# Supplementary material for: Humoral Immune Correlates Analysis of Four Vaccines Against SARS-CoV-2 in Rhesus Macaques
Source: Research Square preprint supplement (doi:10.21203/rs.3.rs-9404931/v1), 2026-04-30
Supplement: Supplementary file 1 [file 02eb2bf90860f13ba0f464bf.docx]

|  |
| --- |
| **Statistical Analysis Plan For**  Assessing Correlates of Protection in Rhesus Macaques Administered Various Vaccine Candidates Designed to Protect Against SARS-CoV-2 Infection |
|  |

Version 2, March 3, 2022

**Authors:**

NIAID - Michael Fay, Allyson Mateja, Martha Nason, Dean Follmann

CoVPN - Peter Gilbert

CDC - Jarad Schiffer, Conrad Quinn

Battelle - Daniel Sanford, Nancy Niemuth

**Sponsor:**

Biomedical Advanced Research and Development Authority (BARDA)

Office of the Assistant Secretary for Preparedness and Response (ASPR)

U. S. Department of Health and Human Services (DHHS)

200 C Street, SW, Washington, DC 20024

**Testing Facility:**

NIAID

5601 Fishers Lane

Rockville, MD 20852

Approval Signatures:

| Michael Fay, Ph.D.  Lead Statistician |  |  |
| --- | --- | --- |
| Date |
| Cristina Cassetti, Ph.D.  NIAID Represenative |  | Date |

Appril Brys, Ph.D. Date

BARDA Represenative

Table of Contents

[1. STATISTICAL ANALYSIS PLAN 5](#_Toc60811572)

[2. OBJECTIVES 5](#_Toc60811573)

[3. INTRODUCTION 5](#_Toc60811575)

[4. TEST SYSTEM 10](#_Toc60811585)

[5. STUDY DESIGN 11](#_Toc60811586)

[6. STATISTICAL CONSIDERATIONS 27](#_Toc60811590)

[7. REFERENCES 33](#_Toc60811607)

Changes to Version 2:

- In Section 3.3.2, we add the clarifying sentence: “AUC will be calculated using log(viral load).”
- In Section 6.4, we revise the models included and the R squared statistics used in the cross validation process. We also added language to discard substantial non-monotonic models if necessary. These changes are motivated by simulations (not included).
- In Sections 3.2, 3.3, and 3.3.2, we added language that “values below the limit of detection will be replaced with half the limit of detection”.

**Statistical Analysis Plan For**

**Assessing Correlates of Protection in Rhesus Macaques Administered Various Vaccine Candidates Designed to Protect Against SARS-CoV-2 Infection**

# STATISTICAL ANALYSIS PLAN

This statistical analysis plan (SAP) is based on the study design as described in Battelle Study Number B06068 “Assessment of Protection Against SARS-CoV-2 Infection in Rhesus Macaques Immunized with Vaccine Candidates”.

# OBJECTIVES

The overall objective of this study is to explore immune correlates in NHPs across different vaccines with different doses within each vaccine. The primary analyses will use humoral antibody immune responses measured at the projected peak immune day (PID) and at the day of challenge as markers to predict infection outcome post-challenge. Secondary analyses will additionally include cellular immune markers. Analyses will explore how vaccine dose and platform affect those predictions.

# A combination of correlates of risk (CoR) and correlates of protection (CoP) analyses will be employed. The objective will be to test markers to see if they are CoR or CoP. The markers encompass both humoral antibody and cellular immune response by use of virus neutralizing antibody assays, binding antibody assays, and/or T cell measurements. Optimally, markers will be reliably measured using a validated assay(s), demonstrate dose response to the vaccine(s), be present in humoral and/or cellular samples obtained from vaccinated trial participants, and strongly correlate with the main efficacy outcome (viral load in the bronchioalveolar lavage (BAL) fluid and nasal swabs by genomic and subgenomic RNA using RT-qPCR).

# INTRODUCTION

**3.1 Study Rationale**

Four vaccines for SARS-CoV-2 are being tested in the United States federal response (previously Operation Warp Speed (OWS)). Each vaccine candidate has undergone testing in animal models and clinical trials. Data from Phase III clinical trials will be evaluated using a combination of correlates of risk (CoR) and correlates of protection (CoP) analyses. This document describes the statistical analysis plan for a study of immune correlates for non-human primates (NHPs) using four vaccines within the Federal Response purview.

In the standard terminology a correlates of risk is a variable or biomarker associated with the risk of a disease or measure of disease severity (Qin, et al 2007), and a correlate of protection is a correlate of risk where additional assumptions and data are added to make statements about the causal effect of the biomarker on protection (Plotkin and Gilbert, 2012). This analysis will primarily be concerned with associations, so in general the term CoR will be used, even though the combination of the many analyses described in this SAP may be used to make a case that any particular CoR is a CoP.

For this study a CoR is a biomarker measured post-vaccination that can be used to predict a disease outcome from SARS-CoV-2 challenge. A CoR study in NHPs is one piece of information that may be used to help bridge the protection in NHPs to protection in humans. There is scientific value to this multi-vaccine NHP study that is not provided by other studies including the following:

- Although each company has done (or may do) their own dose-down studies in NHPs to test for a correlate of protection using their own vaccine, the number of animals tested by any one company is small. This study will add to previous dose-down studies. In addition, by including vaccines from several companies in one study, a more complete picture of the effect of the vaccines on the NHPs may be possible.
- Because all the vaccines are based on inducing an immunological effect (either directly or indirectly) to the spike protein of the SARS-CoV-2 virus, it is possible that one correlate may be identified across different vaccine types and/or platforms. For example, pseudovirus neutralizing antibody titers measured at the predicted peak immunologic day (PID) may be used as a CoR for each vaccine even if those PID occur at different time points with respect to the last immunization. Because of the similarities between vaccines, a single marker may act as a CoR for all four vaccines.
- Although randomized Phase III trials include over 30,000 individuals each, the number of cases used in determining efficacy will be relatively small (approximately 150), and if the vaccine shows high efficacy, the number of cases that received the full regimen of the vaccine will be much smaller (with a 90% vaccine efficacy, a 1:1 randomization, and 150 total events, about 14 cases are expected in the vaccine group). Further, there will be subpopulations that will not be included in the first studies in humans (e.g., children, pregnant women), or will not be included in large numbers (e.g., certain populations of high-risk individuals). Additionally, there is a high dose in the phase III trials which results in high antibody responses, which limit the range of antibody and hinder the ability to identify a correlation with acquisition of disease. Thus, although the randomized clinical trials are the gold standard, in order to expand the populations to receive the vaccine, it will be useful to have an immune correlate to predict efficacy in these other populations. Although there will be correlates analyses from the Phase III data, the NHP study may add valuable information that can inform the human correlates analyses. With the recent emergence of COVID variants of concern with sufficient mutation in the spike protein to evade neutralization, it may be necessary in the near future to rapidly add variant sequences to the vaccine (either as multi-strain vaccines or new single-strain ones). A correlate of protection may allow licensing of new variant vaccines based on immunogenicity rather than efficacy trials, which would be a much faster pathway.
- There are limitations to the Phase III data. There are limited data in the Phase III data on the time of infection, whereas this NHP study is a challenge study where the time of infection is known. The Phase III data have all the experimental vaccinated individuals per trial receiving the same dose, and then getting exposed to infection (or not) through natural exposure. Thus, in Phase III trials the exposures occur at many different times relative to vaccination, so that if the immune markers decrease over time the amount of marker present at exposure will differ as well. Since Phase III trial primary responses are COVID-19 disease through a natural infection process, that process may be related to other unmeasured (and perhaps unknown) confounding factors (‘confounders’) that are also related to the marker values (i.e., it may introduce unmeasured confounding factors), which can invalidate simple causal interpretations of the marker/infection relationship. Further, natural infection will have greater variability than a controlled laboratory experiment. In contrast, this NHP study will be in a controlled environment, so that assumptions about no unmeasured confounding factors are necessary for the causal interpretation of correlates of protection from the Phase III study may not be needed. Further the NHP study will have several different vaccine doses (e.g., the clinical dose and several dilutions), allowing for more variability in the CoR which will be helpful in estimating the CoR associations, especially for outcomes where the full dose provides complete protection.
- If there are robust associations that hold across different vaccines, and those associations are apparent in human studies as well, this will provide more confidence in the usefulness of that correlate in predicting responses in subpopulations of humans where there is less data (e.g., pregnant women), or in vaccines of similar platforms with less direct evidence of efficacy.
- At the VRBPAC meetings with the FDA on Pfizer and Moderna vaccine candidates’ approvals for EUA, questions about correlates of protection were raised by the public and members of VRBPAC committee. This GLP NHP study may potentially address such questions.

**3.2 Purported Correlates of Risk**

For markers that may be possible CoRs we look for several properties. First, there is a plausible biological mechanism of protection for the marker present in both the animal model and in humans (so that it might be a mechanistic correlate of protection [mCoP]), or the marker may be a surrogate that is strongly correlated with such a mechanistic CoP, such that it that might serve as a nonmechanistic CoP (nCoP). Because of this property, assays to determine immune correlates were selected to measure both the humoral and cellular immune response, including virus neutralizing antibody assays, binding antibody assays, or T cell measurements. Second, the possible CoR should be reliably measured using a validated assay. Third, possible CoR should demonstrate a dose response to the vaccine. Finally, and perhaps most importantly, the possible CoR should strongly correlate (or inversely correlate) with the main outcome (see Section 6).

Markers that are possible CoRs in order of preference are discussed below, although many possible immune correlates will be explored, including combinations of different markers. For each possible immune correlate, there may be multiple assays.

The primary analyses will be based on samples collected at both the peak immunological day (two weeks prior to challenge) and the day of challenge. The peak immunological day (PID) will be different for different vaccinations, but for all animals the challenge day will always be 2 weeks after PID (see Table 1). Future durability studies will be needed to explore how durable the vaccine effects are and to explore CoRs in that situation. Values below the limit of detection will be replaced with half the limit of detection.

### **3.2.1 SARS-CoV-2 IgG using ELISA**

There are several possible ways to measure SARS-CoV-2 antibodies using ELISA: full length Spike protein (S-2P)-specific and Receptor Binding Domain (RBD)-specific.

### **3.2.2 Pseudovirus Neutralizing Assay**

This assay has been used in several studies (Mercado, et al., 2020, Fig. 2; Corbett, et al., 2020, Fig. 1D). It has a noticeable dose response to at least one vaccine, and is present in human convalescent sera (Corbett, et al., 2020, Fig. 1D).

### **3.2.3 Wild-type Virus Neutralization Assay**

The wild-type virus neutralization assay correlates well with the pseudo-virus neutralization assay (Mercado, et al., 2020, Extended Fig. 1).

### **3.2.4 Cell Mediated Immune Responses**

Although we expect that the best immune correlates will be among the first three assays described above, it is possible that there is some added benefit from T cell responses.

## **3.3 Possible Challenge Outcome**

Different outcomes will be investigated. For an outcome several properties are desirable. First, the outcome should have a close relationship to an important biological process in human COVID-19 disease, therefore, SARS-CoV-2 viral load in the upper and lower respiratory tract. Second, the outcome should have a strong dose-response relationship with the vaccine, so that higher doses of the vaccine suggest better protection from COVD-19 disease. Third, there should be a large variability in the responses. For example, if all doses of a vaccine reduce an outcome to undetectable limits, that does not allow for sufficient variability to model the vaccine response among animals that received the same dose.

The main outcomes will be measures of viral load in the bronchioalveolar lavage (BAL) fluid and nasal swabs by genomic and subgenomic RNA using RT-qPCR. For the outcome, the sections are based on three decisions: (1) where to take the sample: nasal swab versus BAL; (2) how to summarize the signal: day 2 post-challenge or area under the curve; and (3) whether to dichotomize: log(viral load) versus a binary signal. When using the log transformation and viral load measurements are below the limit of detection, they will be replaced with half the limit of detection here and throughout all analyses. Because this is exploratory, all these measures of viral load will be examined.

**3.3.1 Nasal Swab and Bronchoalveolar Lavage (BAL)**

Nasal swab samples are representative of upper respiratory tract infection, which is biologically close to a measure of transmission since the primary mode of natural transmission appears to be from respiratory droplets emitted from an infected individual. The nasal swab has an apparent advantage over the alternative measure, bronchoalveolar lavage, because in NHP the nasal swab has more variable responses that appear to be related to vaccine dose (see Corbett, et al., 2020, Figure 3), although in some cases it appears to have a less variable response (see Guebre-Xabier, et al., 2020, Figure 1).

Since severe human COVID-19 disease is often associated with respiratory distress, in some ways BAL is a better sample than the nasal swab. The main issue with the BAL is that in several cases the vaccines are closer to near complete suppression of the BAL viral load compared to the nasal swab (see e.g., Corbett, et al., 2020, Figure 3, and Mercado, et al., 2020, Figure 4). One advantage of this study is that there will be several dilutions of the standard vaccine dosages, so that it is likely that some dilutions will not have the complete suppression issue.

**3.3.2 Measure at Day 2 post-challenge or Area Under the Curve (AUC)**

Day 2 post-challenge will be the primary endpoint, because that day appears to have the most variable responses (see Corbett, et al., 2020, Figure 3). An alternative measurement is the peak value after challenge (see e.g., Mercado, et al., 2020, Figure 5); however, day 2 approximates the peak value (see e.g., Mercado, et al., 2020, Figure 4). So, for simplicity, day 2 post-challenge will be evaluated.

To reduce variability, all viral measurements post-challenge will be summarized within each animal using area under the curve (AUC), a measure of the amount of viral load present over time. AUC will be calculated using log(viral load), with viral load measurements below the limit of detection replaced with half the limit of detection.

**3.3.3 Whether and How to Dichotomize the Outcome Measurement**

It is standard to measure viral load on a log scale. Values below the limit of detection will be replaced with half the limit of detection.

If a large proportion of the responses are below the limit of detection, then another approach is a binary response: above the limit of detection (plus/minus). Although there is less differentiation among animals than the log viral count, this binary method alleviates the need to define an arbitrary log viral load value for values less than the limit of detection. Further, the binary response (pos/neg) is suitable when there is a large proportion of the response that are undetectable.

**3.4 Study Design Considerations**

The design is a multi-arm randomized study (Section 5, Table 1). Within most vaccines there will be an undiluted arm and 4 dilution arms as well as a control arm. There will be four vaccine products (e.g., A, B, C, D in Table 2). There will be 8 cohorts of animals for the different challenge days (Table 3).

## Each animal will have two stages within the study. In Stage 1, the animal is vaccinated with one or two immunizations of one of the experimental vaccines or the control. The length of Stage 1 will vary depending on the vaccine and cohort, with the length of Stage 1 chosen such that within each cohort the projected peak immune day (PID) will be the same day. This will require vaccinations to be staggered for each group within a challenge day cohort. The end of Stage 1 will be projected peak immune day (PID). Stage 2 starts from the peak immune day. In Stage 2 the animals in all the arms will be treated the same: they will all be challenged at two weeks post-PID and have post-challenge responses measured on the same days post-PID.

### **3.4.1 Aspects of the Design that are Fixed**

There are many aspects of the design that will be the same for each animal in the study. These are vital to the study, but peripheral to the statistical analysis plan. The following will be the same for every arm of the study:

- - animal species,
  - challenge (dose, routes, virus strain, virus lot),
  - assays (SOPs for collection and running the assays),
  - sample schedule (baseline, peak immunology day, all sample days after PID),
  - animal facility where the study is performed.

### **3.4.2 Stratified Randomization**

Randomization of the animals is detailed in Section 11.1 of the protocol. Briefly, animals will be stratified by body weight and sex and randomized to one of the four vaccine products or placebo.

### **3.4.3 Vaccine Products and Platforms**

There will be several vaccine platforms in the study (e.g., mRNA vaccines as in Corbett, et al., 2020 and the Ad26 vaccines as in Mercado, et al 2020). For some analyses it will be desirable to see if a differential vaccine effect is observed (see Section 6). For these analyses, a way of measuring dose of the vaccines that will translate between different vaccines is required. One difference is the number of scheduled immunizations each vaccine product uses, the mRNA vaccine in Corbett, et al. (2020) uses two immunizations, while the Ad26 vaccine as in Mercado, et al (2020) uses one. Another difference is the way the amount of each vaccine is measured. Corbett, et al. (2020) used micrograms to describe the amount of vaccine, while Mercado et al. (2020) used number of viral particles.

The most straightforward way to handle the differences is to define a standard dose for each vaccine as the dose used in the Phase III trials. Then, within each specific vaccine, the other doses in the animal studies will be represented as fractions (or fold-dilution, or fold increase in concentration) of the standard dose. It will also be possible to calibrate (i.e., estimate a parameter) each vaccine, such that its standard dose is multiplied by a calibration factor.

# TEST SYSTEM

The study population will consist of 126 [63 male (M), 63 female (F)] experimentally naïve rhesus macaques (*Macaca mulatta*) of Chinese origin (>2.5 years of age and >2.5 kg); 15 additional animals will serve as replacements.

# STUDY DESIGN

# 5.1 Study Design

The study design is described in detail in the protocol. For ease of access, some tables from the protocol are reproduced in this document. A summary of the study design is included in Table 1 (same as Protocol Table 1).

Table 1 Study Design

| Vaccine Manufacturer | Group | Vaccine Dose* | Number of animals (M/F) | Vaccination Study Day(s) | Challenge Da y^ | End of In- Life |
| --- | --- | --- | --- | --- | --- | --- |
| Moderna | 1A | Dose 1A | 6 (3/3) | 0, 28 | 56 | 70 |
| 1B | Dose 1B | 6 (3/3) |
| 1C | Dose 1C | 5 (3/2) |
| 1D | Dose 1D | 5 (2/3) |
| 1E | Dose 1E | 4 (2/2) |
| Janssen | 2A | Dose 2A | 6 (3/3) | 0 | 42 | 56 |
| 2B | Dose 2B | 6 (3/3) |
| 2C | Dose 2C | 4 (2/2) |
| 2D | Dose 2D | 6 (3/3) |
| 2E | Dose 2E | 6 (3/3) | 0, 56 | 84 | 98 |
| 2F | Dose 2F | 4 (2/2) |
| Novavax | 3A | Dose 3A | 4 (2/2) | 0, 21 | 49 | 63 |
| 3B | Dose 3B | 6 (3/3) |
| 3C | Dose 3C | 6 (3/3) |
| 3D | Dose 3D | 6 (3/3) |
| 3E | Dose 3E | 4 (2/2) |
| Sanofi | 4A | Dose 4A | 6 (3/3) | 0, 21 | 49 | 63 |
| 4B | Dose 4B | 6 (3/3) |
| 4C | Dose 4C | 6 (3/3) |
| 4D | Dose 4D | 4 (2/2) |
| 4E | Dose 4E | 4 (2/2) |
| Controls | 5A | 5A | 16 (8/8) | 0, 28 | 56 | 70 |

*Information on the various vaccine doses for each manufacturer are found in Attachment 1 of the protocol.

^ Vaccination dates will be staggered for each group within a challenge day cohort in order for challenges to occur on the same calendar date.

Table 2 (protocol Table 3) summarizes the time relative to the day of challenge each group will receive a vaccine candidate dose or control material.

Table 2 Timeline for Vaccination Relative to Challenge

| Vaccine Candidate | 84  days before challenge | 56  days before challenge | 49  days before challenge | 42  days before challenge | 28  days before challenge | Challenge |
| --- | --- | --- | --- | --- | --- | --- |
| Moderna |  | X |  |  | X |
| Janssen (Single Dose Regimen) |  |  |  | X |  |
| Janssen (Two Dose Regimen) | X |  |  |  | X |
| Novavax |  |  | X |  | X |
| Sanofi |  |  | X |  | X |
| Placebo |  | X |  |  | X |

X = Vaccine candidate or control article administered.

# 5.2 Randomization

To account for differences among the animals, they will be randomized, stratified by sex and body weight to receive a vaccine candidate or control (Moderna, Janssen, Novavax, Sanofi, or placebo) or be assigned as a potential replacement. Once this is complete, animals will be randomized to study-group/challenge day combinations (balanced within group by sex, as sample size allows). Vaccine group in relation to challenge day are defined in Table 3 (protocol Table 2).

**Table 3 Randomization to Challenge Day**

| Challenge Day^ | Groups Included (# per Group) |  | Challenge Day^ | Groups Included (# per Group) |
| --- | --- | --- | --- | --- |
| CDA | 1A (3)  2A (3)  3A (4)  4A (3)  5A (2) | CDE | 1E (4)  2D (3)  3E (4)  4E (4)  5A (2) |
| CDB | 1B (3)  2A (3)  2B (3)  3B (3)  4B (3)  5A (2) | CDF | 1B (3)  2E (3)  3B (3)  4B (3)  5A (2) |
| CDC | 1C (3)  2B (3)  2C (2)  3C (3)  4C (3)  5A (2) | CDG | 1A (3)  1C (2)  2E (3)  3C (3)  4C (3)  5A (2) |
| CDD | 1D (2)  2C (2)  2D (3)  3D (3)  4A (3)  5A (2) | CDH | 1D (3)  2F (4)  3D (3)  4D (4)  5A (2) |

^Vaccination dates will be staggered for each group within a challenge day cohort in order for challenges to occur on the same calendar date.

# 5.3 Study Procedures

Baseline clinical pathology (hematology and clinical chemistry) assessment will be conducted for animals prior to vaccination for the sole purpose of determination of animal health status/suitability for use on study.

On the day of challenge, NHPs will be anesthetized and challenged with SARS-CoV-2 via the intratracheal (IT) (0.5 mL) & intranasal (IN) (0.25 mL per nostril) routes with a target dose of 1.0 X 106 TCID50.

Planned specimen collection and measurements for each vaccine group (test and control) are given in Tables 4 – 9. The following study endpoints will be measured at least once prior to and at multiple time points after study initiation:

**Body weight:** Body weights will be collected at least once before the first vaccination, on Day 0, and approximately every two weeks through the end of in-life (the day of euthanasia).

**Clinical observations:**  Animals will be observed twice daily for clinical signs from Day 0 through the day prior to euthanasia. On the scheduled day of euthanasia, clinical observations will only be recorded once.

**Virus specific antibody:** blood collected in serum separator tubes (SSTs) will be processed to serum and tested using a combination of assays including:

Microneutralization (MN) Assay - to detect and quantify neutralizing antibodies to SARS-CoV-2.

Pseudovirus Neutralization Assay (PsVNA) - to detect and quantify neutralizing antibodies to lentivirus particles pseudotyped with the SARS-CoV-2 spike protein.

Meso Scale Discovery Electrochemiluminescence Immunoassay (MSD-ECLIA) - provides for the quantitative detection of IgG antibodies to SARS-CoV-2 spike protein, receptor binding domain, nucleocapsid, and a BSA control.

**Viral load:** nasal swab, oropharyngeal swab, and BAL samples will be tested using a combination of assays:

RT-qPCR Analysis - viral nucleic acid will be quantified in nasal swab, oropharyngeal swab and BAL samples by RT-qPCR using a Nucleocapsid Gene Segment N1 assay and a Small Envelope Protein (E) Gene Subgenomic RNA assay.

Tissue Culture Infectious Dose 50 (TCID50) assay – infectious virus will be quantified in nasal swab and oropharyngeal swab samples using TCID50 assays.

**Cell Mediated Immune Response-** peripheral blood mononuclear cells (PBMCs) will be isolated from whole blood using cell preparation tubes (CPTs). Cryopreserved PBMCs will be shipped to the McElrath Lab for intracellular cytokine staining (ICS) analysis. Conduct of ICS testing is outside the scope of the Battelle study protocol. However, results will be included as part of the correlates of protection analysis and analyzed under this SAP.

**Systems Serology**- serum samples will be shipped to the Alter Lab for systems serology testing and analysis. Conduct of this testing is outside the scope of the Battelle study protocol and correlates of protection analysis for those serum samples and will not be analyzed under this SAP.

**Table 4. Sample Collection Schedule and Testing for Animals in Groups 1A, 1B, 1C, 1D and 1E (Moderna)**

| **Study Day (Relative to Challenge)** | **Blood Collection Volume/**  **Blood Tube** | **Sera for MNA, MSD-ECLIA, PsVNA, ^Systems Serology, Retentions** | **BAL Collection** | **Nasal / Oropharyngeal Swabs** | **Nasal Wash** | **PBMC** |
| --- | --- | --- | --- | --- | --- | --- |
| Prior to Vaccination | ~6 mL SST  ~16 mL CPT | X | X |  | X | X |
| 7 (Day -49 PreC) | ~6 mL SST | X |  |  |  |  |
| 14 (Day -42 PreC) | ~6 mL SST | X |  |  |  |  |
| 21 (Day -35 PreC) | ~6 mL SST | X |  |  |  |  |
| 28 (Day -28 PreC) | ~6 mL SST | X |  |  |  |  |
| 35 (Day -21 PreC) | ~6 mL SST | X |  |  |  |  |
| 42 (Day -14 PreC) | ~6 mL SST  ~16 mL CPT | X | X |  | X | X |
| 49 (Day -7 PreC) | ~6 mL SST | X |  |  |  |  |
| *56 (Challenge) | ~6 mL SST | X |  | X |  |  |
| 57 (Day 1 PC) |  |  |  | X |  |  |
| 58 (Day 2 PC) | ~3 mL SST | X | X | X |  |  |
| 59 (Day 3 PC) |  |  |  | X |  |  |
| 60 (Day 4 PC) | ~3 mL SST | X | X | X |  |  |
| 61 (Day 5 PC) |  |  |  | X |  |  |
| 62 (Day 6 PC) |  |  |  | X |  |  |
| 63 (Day 7 PC) | ~3 mL SST | X | X | X |  |  |
| 65 (Day 9 PC) | ~3 mL SST | X | X | X |  |  |
| 70 (Day 14 PC) | ~40 mL SST | X |  | X |  |  |

BAL = Bronchoalveolar Lavage

CPT = Cell Preparation Tubes

MN = Microneutralization

MSD-ECLIA = Meso Scale Discovery Electrochemiluminescence Immunoassay

PC = Post-challenge

PBMC = peripheral blood mononuclear cells

PreC = Pre-challenge

PsVNA = Pseudovirus Neutralization Assay

SST = Serum separator tube

^ System Serology only performed on pre-challenge samples

*Collected before challenge

**Table 5. Sample Collection Schedule for Animals in Groups 2A, 2B, 2C and 2D (Janssen Single Dose Regimen)**

| **Study Day (Relative to Challenge)** | **Blood Collection Volume/**  **Blood Tube** | **Sera for MNA, MSD-ECLIA, PsVNA, ^Systems Serology, Retentions** | **BAL Collection** | **Nasal / Oropharyngeal Swabs** | **Nasal Wash** | **PBMC** |
| --- | --- | --- | --- | --- | --- | --- |
| Prior to Vaccination | ~6 mL SST  ~16 mL CPT | X | X |  | X | X |
| 7 (Day -35 PreC) | ~6 mL SST | X |  |  |  |  |
| 14 (Day -28 PreC) | ~6 mL SST | X |  |  |  |  |
| 21 (Day -21 PreC) | ~6 mL SST | X |  |  |  |  |
| 28 (Day -14 PreC) | ~6 mL SST  ~16 mL CPT | X | X |  | X | X |
| 35 (Day -7 PreC) | ~6 mL SST | X |  |  |  |  |
| *42 (Challenge) | ~6 mL SST | X |  | X |  |  |
| 43 (Day 1 PC) |  |  |  | X |  |  |
| 44 (Day 2 PC) | ~3 mL SST | X | X | X |  |  |
| 45 (Day 3 PC) |  |  |  | X |  |  |
| 46 (Day 4 PC) | ~3 mL SST | X | X | X |  |  |
| 47 (Day 5 PC) |  |  |  | X |  |  |
| 48 (Day 6 PC) |  |  |  | X |  |  |
| 49 (Day 7 PC) | ~3 mL SST | X | X | X |  |  |
| 51 (Day 9 PC) | ~3 mL SST | X | X | X |  |  |
| 56 (Day 14 PC) | ~40 mL SST | X |  | X |  |  |

BAL = Bronchoalveolar Lavage

CPT = Cell Preparation Tubes

MN = Microneutralization

MSD-ECLIA = Meso Scale Discovery Electrochemiluminescence Immunoassay

PC = Post-challenge

PBMC = peripheral blood mononuclear cells

PreC = Pre-challenge

PsVNA = Pseudovirus Neutralization Assay

SST = Serum separator tube

^ System Serology only performed on pre-challenge samples

*Collected before challenge

**Table 6. Sample Collection Schedule for Animals in Groups 2E and 2F (Janssen Two Dose Regimen)**

| **Study Day (Relative to Challenge)** | **Blood Collection Volume/**  **Blood Tube** | **Sera for MNA, MSD-ECLIA, PsVNA, ^Systems Serology, Retentions** | **BAL Collection** | **Nasal / Oropharyngeal Swabs** | **Nasal Wash** | **PBMC** |
| --- | --- | --- | --- | --- | --- | --- |
| Prior to Vaccination | ~6 mL SST  ~16 mL CPT | X | X |  | X | X |
| 7 (Day -77 PreC) | ~6 mL SST | X |  |  |  |  |
| 14 (Day -70 PreC) | ~6 mL SST | X |  |  |  |  |
| 21 (Day -63 PreC) | ~6 mL SST | X |  |  |  |  |
| 28 (Day -56 PreC) | ~6 mL SST | X |  |  |  |  |
| 35 (Day -49 PreC) | ~6 mL SST | X |  |  |  |  |
| 42 (Day -42 PreC) | ~6 mL SST | X |  |  |  |  |
| 49 (Day -35 PreC) | ~6 mL SST | X |  |  |  |  |
| 56 (Day -28 PreC) | ~6 mL SST | X |  |  |  |  |
| 63 (Day -21 PreC) | ~6 mL SST | X |  |  |  |  |
| 70 (Day -14 PreC) | ~6 mL SST  ~16 mL CPT | X | X |  | X | X |
| 77 (Day -7 PreC) | ~6 mL SST | X |  |  |  |  |
| *84 (Challenge) | ~6 mL SST | X |  | X |  |  |
| 85 (Day 1 PC) |  |  |  | X |  |  |
| 86 (Day 2 PC) | ~3 mL SST | X | X | X |  |  |
| 87 (Day 3 PC) |  |  |  | X |  |  |
| 88 (Day 4 PC) | ~3 mL SST | X | X | X |  |  |
| 89 (Day 5 PC) |  |  |  | X |  |  |
| 90 (Day 6 PC) |  |  |  | X |  |  |
| 91 (Day 7 PC) | ~3 mL SST | X | X | X |  |  |
| 93 (Day 9 PC) | ~3 mL SST | X | X | X |  |  |
| 98 (Day 14 PC) | ~40 mL SST | X |  | X |  |  |

BAL = Bronchoalveolar Lavage

CPT = Cell Preparation Tubes

MN = Microneutralization

MSD-ECLIA = Meso Scale Discovery Electrochemiluminescence Immunoassay

PC = Post-challenge

PBMC = peripheral blood mononuclear cells

PreC = Pre-challenge

PsVNA = Pseudovirus Neutralization Assay

SST = Serum separator tube

^ System Serology only performed on pre-challenge samples

*Collected before challenge

**Table 7. Sample Collection Schedule for Animals in Groups 3A, 3B, 3C, 3D and 3E (Novavax )**

| **Study Day (Relative to Challenge)** | **Blood Collection Volume/**  **Blood Tube** | **Sera for MNA, MSD-ECLIA, PsVNA, ^Systems Serology, Retentions** | **BAL Collection** | **Nasal / Oropharyngeal Swabs** | **Nasal Wash** | **PBMC** |
| --- | --- | --- | --- | --- | --- | --- |
| Prior to Vaccination | ~6 mL SST  ~16 mL CPT | X | X |  | X | X |
| 7 (Day -42 PreC) | ~6 mL SST | X |  |  |  |  |
| 14 (Day -35 PreC) | ~6 mL SST | X |  |  |  |  |
| 21 (Day -28 PreC) | ~6 mL SST | X |  |  |  |  |
| 28 (Day -21 PreC) | ~6 mL SST | X |  |  |  |  |
| 35 (Day -14 PreC) | ~6 mL SST  ~16 mL CPT | X | X |  | X | X |
| 42 (Day -7 PreC) | ~6 mL SST | X |  |  |  |  |
| *49 (Challenge) | ~6 mL SST | X |  | X |  |  |
| 50 (Day 1 PC) |  |  |  | X |  |  |
| 51 (Day 2 PC) | ~3 mL SST | X | X | X |  |  |
| 52 (Day 3 PC) |  |  |  | X |  |  |
| 53 (Day 4 PC) | ~3 mL SST | X | X | X |  |  |
| 54 (Day 5 PC) |  |  |  | X |  |  |
| 55 (Day 6 PC) |  |  |  | X |  |  |
| 56 (Day 7 PC) | ~3 mL SST | X | X | X |  |  |
| 59 (Day 9 PC) | ~3 mL SST | X | X | X |  |  |
| 63 (Day 14 PC) | ~40 mL SST | X |  | X |  |  |

BAL = Bronchoalveolar Lavage

CPT = Cell Preparation Tubes

MN = Microneutralization

MSD-ECLIA = Meso Scale Discovery Electrochemiluminescence Immunoassay

PC = Post-challenge

PBMC = peripheral blood mononuclear cells

PreC = Pre-challenge

PsVNA = Pseudovirus Neutralization Assay

SST = Serum separator tube

^ System Serology only performed on pre-challenge samples

*Collected before challenge

**Table 8. Sample Collection Schedule** for Animals in Groups 4A, 4B, 4C, 4D, and 4E **(Sanofi)**

| **Study Day (Relative to Challenge)** | **Blood Collection Volume/**  **Blood Tube** | **Sera for MNA, MSD-ECLIA, PsVNA, ^Systems Serology, Retentions** | **BAL Collection** | **Nasal / Oropharyngeal Swabs** | **Nasal Wash** | **PBMC** |
| --- | --- | --- | --- | --- | --- | --- |
| Prior to Vaccination | ~6 mL SST  ~16 mL CPT | X | X |  | X | X |
| 7 (Day -42 PreC) | ~6 mL SST | X |  |  |  |  |
| 14 (Day -35 PreC) | ~6 mL SST | X |  |  |  |  |
| 21 (Day -28 PreC) | ~6 mL SST | X |  |  |  |  |
| 28 (Day -21 PreC) | ~6 mL SST | X |  |  |  |  |
| 35 (Day -14 PreC) | ~6 mL SST  ~16 mL CPT | X | X |  | X | X |
| 42 (Day -7 PreC) | ~6 mL SST | X |  |  |  |  |
| *49 (Challenge) | ~6 mL SST | X |  | X |  |  |
| 50 (Day 1 PC) |  |  |  | X |  |  |
| 51 (Day 2 PC) | ~3 mL SST | X | X | X |  |  |
| 52 (Day 3 PC) |  |  |  | X |  |  |
| 53 (Day 4 PC) | ~3 mL SST | X | X | X |  |  |
| 54 (Day 5 PC) |  |  |  | X |  |  |
| 55 (Day 6 PC) |  |  |  | X |  |  |
| 56 (Day 7 PC) | ~3 mL SST | X | X | X |  |  |
| 59 (Day 9 PC) | ~3 mL SST | X | X | X |  |  |
| 63 (Day 14 PC) | ~40 mL SST | X |  | X |  |  |

BAL = Bronchoalveolar Lavage

CPT = Cell Preparation Tubes

MN = Microneutralization

MSD-ECLIA = Meso Scale Discovery Electrochemiluminescence Immunoassay

PC = Post-challenge

PBMC = peripheral blood mononuclear cells

PreC = Pre-challenge

PsVNA = Pseudovirus Neutralization Assay

SST = Serum separator tube

^ System Serology only performed on pre-challenge samples

*Collected before challenge

**Table 9. Sample Collection Schedule for Animals in Group 5A (Placebo Controls)**

| **Study Day (Relative to Challenge)** | **Blood Collection Volume/**  **Blood Tube** | **Sera for MNA, MSD-ECLIA, PsVNA, ^Systems Serology, Retentions** | **BAL Collection** | **Nasal / Oropharyngeal Swabs** | **Nasal Wash** | **PBMC** |
| --- | --- | --- | --- | --- | --- | --- |
| Prior to Vaccination | ~6 mL SST  ~16 mL CPT | X | X |  | X | X |
| 7 (Day -49 PreC) | ~6 mL SST | X |  |  |  |  |
| 14 (Day -42 PreC) | ~6 mL SST | X |  |  |  |  |
| 21 (Day -35 PreC) | ~6 mL SST | X |  |  |  |  |
| 28 (Day -28 PreC) | ~6 mL SST | X |  |  |  |  |
| 35 (Day -21 PreC) | ~6 mL SST | X |  |  |  |  |
| 42 (Day -14 PreC) | ~6 mL SST  ~16 mL CPT | X | X |  | X | X |
| 49 (Day -7 PreC) | ~6 mL SST | X |  |  |  |  |
| *56 (Challenge) | ~6 mL SST | X |  | X |  |  |
| 57 (Day 1 PC) |  |  |  | X |  |  |
| 58 (Day 2 PC) | ~3 mL SST | X | X | X |  |  |
| 59 (Day 3 PC) |  |  |  | X |  |  |
| 60 (Day 4 PC) | ~3 mL SST | X | X | X |  |  |
| 61 (Day 5 PC) |  |  |  | X |  |  |
| 62 (Day 6 PC) |  |  |  | X |  |  |
| 63 (Day 7 PC) | ~3 mL SST | X | X | X |  |  |
| 65 (Day 9 PC) | ~3 mL SST | X | X | X |  |  |
| 70 (Day 14 PC) | ~40 mL SST | X |  | X |  |  |

BAL = Bronchoalveolar Lavage

CPT = Cell Preparation Tubes

MN = Microneutralization

MSD-ECLIA = Meso Scale Discovery Electrochemiluminescence Immunoassay

PC = Post-challenge

PBMC = peripheral blood mononuclear cells

PreC = Pre-challenge

PsVNA = Pseudovirus Neutralization Assay

SST = Serum separator tube

^ System Serology only performed on pre-challenge samples

*Collected before challenge

# Statistical Considerations

## **6.1 Overview**

Immune correlates analyses are a way to get a fuller picture of the possible relationship between post-vaccination immune measurements and post-challenge outcomes. The analyses using a marker (i.e., a purported immune correlate, such as one variable from Section 3.2) and a post-challenge outcome (i.e., one variable from Section 3.3) are described below. The statistical section describes generic analyses defined in terms of the type of data (e.g., outcome is binary and immune correlate is non-binary numeric). Several combinations of outcomes and immune correlates will be examined. Because this study is essentially a hypothesis generating study, there will not be an adjustment for multiple comparisons for several reasons. First, it is expected that several of the purported immune responses will be correlated to each other as well as with the outcomes, therefore many of the results will be similar. Second, the many different combinations will be exploring and explaining different aspects of the vaccine efficacy, therefore, many of the results will be reported rather than only the most significant results. Third, it may not be clear until the data are available as to which analyses will provide the clearest picture of the association of the correlate of risk with the outcome.

Section 6.2 details the simple pairwise statistics and graphics.

Section 6.3 explores the causal effects that can be estimated. To scientifically determine if an intervention causes an outcome, the gold standard is a randomized experiment. For this study, the animals are randomized to different vaccine arms, so the causal inferences that are most easily made and with the fewest assumptions are how the vaccine arms relate to post-vaccination outcomes. In this study the two types of post-vaccination outcomes of the most interest are the challenge responses (Section 6.3.1) and the possible immune correlates (Section 6.3.2). The hypothesis is that within each vaccine product, both of these two types of outcomes will be related to vaccine dose. These hypotheses will be tested as detailed in Section 6.3.

Section 6.4 describes models with one marker and one outcome. Section 6.5 and 6.6 describe the outcome variance explained by the model including only the immune correlate as a percentage of the outcome variance explain by a fuller model including dose level (Section 6.5) or including all dose/vaccine combination levels (Section 6.6). Section 6.7 describes repeating these types of analyses with possibly two immune correlates. Section 6.8 describes a cross validation prediction, whereby one vaccine product (or group of vaccine products) is used to build a model, and that model is used to predict responses for another vaccine product. Section 6.9 discusses a harmonized analysis with the human correlates study. Section 6.10 describes machine learning approaches to incorporate possibly many covariates at once to predict outcomes. Finally, we end in Section 6.11 with a discussion of sample size.

## **6.2 Graphical Exploration of Immune Correlates and Post-Challenge Outcome**

Scatter plots of pairs of immune markers will be generated to determine how well they correlate. All arms (different vaccine products, different dilutions, and controls) will be included on the same figure with different colors for dose groups and different panels for vaccine product. Simple statistics will be performed independent of the vaccine product. For example, the Spearman correlation between each pair of immune markers will be calculated. Spearman (i.e., rank) correlations with confidence intervals will be generated; confidence intervals for the Spearman’s correlation coefficient are calculated by using the ranks in a Pearson’s correlation, which generally performs well (Caruso and Cliff, 1997). If there are many ties, this method will be checked using nonparametric bootstrap as a sensitivity analysis.

Pairwise plots of each immune marker with each post-challenge outcome will be generated. Data will be plotted with different colors for dose group and different panels for vaccine product. For the numeric outcomes, Spearman correlations will be calculated. For binary outcomes, the geometric mean ratio (GMR) as the geometric mean of the immune correlates from those animals with a positive signal for the outcome (e.g., viral sub-genomic RNA for nasal swab at day 2 post-challenge) over the geometric mean of the immune correlates from those animals without a positive signal will be calculated. The confidence interval and tests on the GMR will be calculated by t-test on the difference in means of the log10 immune correlate values, and back-transforming it to GMRs.

## **6.3 Dose-Response Effects of Vaccine Product on Immune Correlates or Post-Challenge Outcome**

The expectation is that there will be a significant dose-response effect for both the immune correlates and the post-challenge outcomes. For each immune correlate or outcome, a test for a dose response will be performed. Since each vaccine product will have its own set of dose dilutions, we define a separate dose score for each vaccine. Let be the jth dose for vaccine A, and let be the minimum dose (i.e., the most diluted dose) of vaccine A, then the corresponding dose score is

Thus, the dose score associated with the minimum dose will always be 1, and the dose 10 times larger will be 2, etc. We define the dose score for the placebo group to be 0, which is functionally equivalent to a 10-fold dilution of the minimum dose for each vaccine. Most vaccines will be given as two immunizations. For those animals that are given as only 1 immunization, we will define two vaccine scores: (1) same as above (i.e., animals that are given 1 immunization of dose x, will have the same dose score as animals that have 2 immunizations [prime+boost] of dose x), or (2) the values associated with one scheduled immunization have their dose divided by 2 (because the cumulative dose is half as much as those that get two scheduled immunizations). Alternatively, some analyses may leave out animal groups that only received one immunization.

### **6.3.1 Numeric Values (immune marker or post-challenge outcome)**

Initially, within each vaccine product a Spearman correlation (i.e., rank correlation) of the dose score with the marker or post-challenge outcome will be performed. This is a check that the marker and outcome is associated with vaccine dose in a monotonic way. Then, the overall Spearman correlation with all vaccine product and the placebo arms included will be done.

We graphically plot the marker and outcome by dose score, with geometric means and 95% confidence intervals within each dose score/vaccine product group.

Next we fit a linear model on the log of the outcome, where the model for the mean will include an intercept, and the dose scores are treated as numeric allowing a different dose parameter for each vaccine product. This model will allow a calibration of each dose score to its vaccine product. Let yjk, vjk, and djk, be the numeric outcome, vaccine product, and dose score, respectively for the kth animal in the jth vaccine dose group (where a vaccine dose group is defined by a row in Table 1, except placebos that are all combined). Then the model is

where =1 if statement S is true, and 0 otherwise.

This will be fit with a generalized estimating equation (GEE) model with the data clustered by challenge day groupings (see groups defined in Table 3) using a working independence variance model. Because the GEE model uses a sandwich estimator of variance, it allows for misspecification of the model. Typically, the GEE models are presumed as misspecifying the variance with a “working variance” model; however, sandwich estimators also work for misspecifying the mean (see e.g., White, 1996). For example, if the models for the CoR predicting the outcome are similar but slightly different for different vaccine product, then the model without vaccine product information will be misspecified and will measure a kind of average effect. Because GEE methods are typically anti-conservative, inferences adjusted for small samples will be made using the saws R package with the default method (Fay and Graubard, 2001).

### **6.3.2 Binary Outcomes**

For binary variables, when possible (i.e., when not all of the binary responses are the same), within each vaccine product a dose-response will be evaluated by a Wilcoxon-Mann-Whitney (WMW) test comparing the dose score of animals with a positive signal to those with a negative signal. Then, the overall WMW test with all vaccine product and the placebo arms included will be done.

We graphically plot the immune correlate for each vaccine product, stratified by animals with a positive signal and animals with a negative signal.

As a combined analysis, a GEE logistic regression will be used when possible. The linear predictor portion of the model will be the same as in Section 6.3.1. The model will be fit with a GEE model with the data clustered by challenge day groupings using a working independence variance model and the saws adjustment for small samples as in Section 6.3.1.

## **6.4 Prediction of Post-Challenge Outcome with Single Immune Correlate**

The first step is to predict a post-challenge outcome (chosen from Section 3.3) using an immune marker (from Section 3.2). Different models are used depending on whether the post-challenge outcome is binary or numeric.

### **6.4.1 Numeric Outcomes**

For numeric outcomes, several models will be fit using the log of the response value. Let yjk and xjk be the outcome (e.g., log of the viral load outcome) and the immune correlate, respectively, for the kth animal in the jth arm. Let be the mean response associated with yjk. For this model, the vaccine arm is not modeled, so that two animals from different vaccine arms with the same value of the immune correlate will have the same predicted response. Several different models will be fit to the data, and best model will be selected by repeated cross validation, where a certain proportion of the animals (e.g., 10%) are randomly left out of the model building and those left-out animals will be used to compare the fits of different models by adjusted R-squared. Here is a list of models that may be tried; however, other models may be used if the fit is appropriate.

The simplest model tried will be the linear model:

Another model is an exponential model (see e.g., McMahan, et al., 2020, Fig. 2). A third set of models are segmented regression models with 2 breakpoints, using the segmented R package (Muggeo, 2020). A fourth set of models are fit with natural cubic splines with 5 degrees of freedom, using the default knots in the ns function in the spline R package. Finally, a four parameter logistic (4-PL) model may also be evaluated in the drm function in the drc R package (Ritz et al., 2015):

µjk= B + (A-B)/(1+(xjk/C)^D )

Where the 4-PL parameters are: A = lower asymptote, B = upper asymptote, C = midpoint, D = slope parameter. That model will be fit by least squares and the BFGS optimization method.

If the cross-validation produces a model with substantial non-monotonicity, we may remove that model type from consideration and repeat the CV without that model. This process may be repeated if necessary.

Once the model is selected by cross validation, the selected model will be fit to all of the data. If the selected model is not segmented regression, pointwise confidence intervals on the predicted values will be calculated using the parametric formula: where = the estimated predicted value for the kth animal in the jth arm, SE = the standard error for the estimate of the predicted value, and = critical value from the t distribution corresponding to α/2 and n-p degrees of freedom (p includes the intercept, where applicable). This is analogous to the built-in predict functions in R. If the segmented regression model is selected by the cross-validation procedure, pointwise confidence intervals on the predicted values will be calculated by nonparametric bootstrap.

### **6.4.2 Binary Outcomes**

For binary outcomes, a logistic model is fit with an intercept and one main effect for the immune correlate. The notation is the same as in Section 6.4.1, except now yjk represents a binary response. As in the previous Section, several models will be tried and the best one selected by cross-validation. Instead of comparing the models using adjusted R-squared, we use the binary analog, the adjusted coefficient of discrimination (Tjur, 2009, Fay et al., 2012). The models tried are the following. The logistic model:

Loge{μjk /(1-μjk )} = + β1 xjk

Analogously to Section 6.4.1, the linear predictor portion of the model may be modeled in different ways: it could be fit as a segmented line with 2 breakpoints, or fit with natural cubic splines with 5 degrees of freedom. As in section 6.4.1, the best model by cross-validation will be fit to all of the data (enforcing monotonicity if needed), with confidence intervals on the prediction calculated using the parametric formula as above or nonparametric bootstrap (for segmented regression).

## **6.5 Percent of Variance Explained by Immune Correlates**

This section aims to answer the question: how much of the variance of the outcome is explained by the immune correlate, compared to models with vaccine type and vaccine dose additionally included? First a variable is defined, PVE: the Percentage of the Variance of the outcome Explained by the immune correlate apart from the vaccine type and dose. This approach will only be used if it is confirmed that the dose is related to outcome (Section 6.3). If the dose is related to outcome, then the PVE equals 0 if the immune correlate explains none of the variability of the outcome, and the PVE will equal 100 if the immune correlate explains as much of the variability as the more expansive model with effects for vaccine type and dose added (in other words, PVE=100 means that all of the effect of the vaccine acts through the immune correlate). If the PVE is substantial, then that immune correlate acts as a correlate of protection (CoP). A dose-response causal effect for the vaccines will likely have already been established in Section 6.3. However, a mechanistic meaning is not assigned to the CoP, as it may or may not be a mediator in the biological pathway to protection (Plotkin and Gilbert, 2012).

We first describe this analysis in its most basic form. The first step is to describe the association between the immune correlate and the outcome with two models: the **base model** and the **base + dose model**. The base model predicts the outcome using the immune correlate. The model is explained for the linear model, although more complicated models (see Section 6.4) may be used if feasible. For a continuous outcome like that described in Section 6.4.2, a linear model is fit with an intercept and a linear term for the immune correlate. To measure how much of the variance of the outcome is explained by the model an adjusted R square value is employed such that,

where n is the sample size, and p is the number of parameters (including the intercept). The base + dose model is a linear model that allows a separate line of prediction of outcome by immune correlate for each dose score (dose scores may have to be adjusted, if the estimated values of from the model in Section 6.3.1 are not approximately equal). We get an adjusted R squared for the base + dose model. Then the percentage of variance explained by the immune correlate apart from the dose (PVE) is 100 times the adjusted R square value from the base model over the adjusted R squared values from the base + dose model.

For binary outcomes there is a slight variation of the method. Logistic regression is used to predict the outcome in the two models, and the adjusted coefficient of discrimination (an analog to the adjusted R squared for use with logistic regression). The case with the binary outcome was used in Fay et al (2012), where the PVE statistic was called the percent of prediction explained (PPE) and the base model was called ``Model 1’’ and the base + dose model was called ``Model 3’’.

Confidence intervals on the PVE are calculated by using nonparametric bootstrap methods as in Fay et al., (2012).

## **6.6 Examining Differential Vaccine Effect**

One way of examining differential vaccine effects is to create two models to predict outcome using the combined data. The base + dose model uses the immune correlate plus the dose of the vaccine with a degree of freedom for each dose score (see Section 6.3 for definition of the dose score). In the base + dose model, information regarding the identity of the vaccine administered is not included in the analysis, except in information captured in the dose score. For the second model, termed the base + dose + vacc model, separate effects for each specific vaccine/dose score combination (i.e., a different linear model for each specific vaccine/dose) will be included. Linear models for numeric outcomes (e.g., Section 6.4.1) or logistic models for binary outcomes (e.g., Section 6.4.2) will be employed. In either case, the base + dose model is a special case of the base + dose + vacc model when the vaccine effects are the same. Thus, we can test if the specific vaccine information significantly improves the fit by using a likelihood ratio test. However, as with Section 4, whether there is a significant difference or not is not as important as how large the difference in effects is. To measure the how large that difference is we use the Percent of Variance Explained (PVE) as was done in Section 6.5, except now the base + dose model replaces the base model and the base + dose + vacc model replaces the base + dose model. Inferences on the PVE will use nonparametric bootstrap as in Section 6.5.

## **6.7 Studying Two Immune Correlates at Once**

As exploratory analyses, Sections 6.4 - 6.6 may be repeated by trying two immune correlates in a model at a time. We will not select from only the best fitting single correlates, because the best pair may come from two. For example, one immune correlate related to antibody response and one immune correlated related to T cell response. For some of the simple linear models, the statistical methods are essentially the same, except for example, the linear predictor part of the model now has a term for each of the two immune correlates instead of only one. More complicated models may not be feasible with two markers (e.g., segmented line regression). Additionally, an interaction term may be added.

## **6.8 Cross Validation Prediction using Vaccine Product**

To explore the robustness of the prediction, a cross validation analysis using the 4 vaccine products will be explored. Specifically, a prediction model for the outcome will be created using a correlate based on data from all but one of the vaccine products (e.g., the final selected model in Section 6.41 or 6.4.2). Then that model will be used to predict the outcome in animals that got the vaccine product that was not used to build the model. We will use agreement measures to predict how well the modelled outcomes predict the observed outcomes (in the animals that got the vaccine product left out of the prediction model). We will use the RMAC (random marginal agreement coefficient) versions of the concordance correlation coefficient for numeric responses or the RMAC Cohen’s Kappa coefficient for binary responses. RMAC are the same as the usual agreement coefficients when the distribution of the predicted outcomes equal the distribution of the observed outcomes, but when those distributions differ the RMAC are slightly better because they do not imply greater agreement when those distributions disagree more (Fay, 2005). This cross validation prediction will be repeated for each vaccine product. See Fay, et al., (2012), for a similar idea predicting outcome in different species. We use a nonparametric bootstrap to perform the inferences.

These types of cross validation prediction may also be done for pairs of vaccine products. For example, build a prediction model using data from Vaccine A and use it to predict Vaccine B, predict using Vaccine A to predict Vaccine C, etc.

## **6.9 Comparison with the Human Correlates Studies**

Additional analyses may be added to facilitate comparison with human studies, either the large human correlates study that is part of the US Federal response (formerly OWS), or other human studies such as challenge studies. One possibility for an analysis between the NHP and human studies is the following. If the outcome is binary, let Y=1 or Y=0 represent the presence or absence of the outcome event (e.g., detectable viral load at day 2 from nasal swab in the NHP study, or detection of natural COVID disease during a specified time period in the human randomized trials) for a random individual. Let S and W represent the correlate and a set of baseline covariates, respectively. It is possible that there will be no useful set of baseline covariates, so that W is not used. The parameters of interest estimated by logistic regression could be the expected probability of the event given the S=s averaged over the baseline covariate. In statistical notation, that is

EW[P(Y=1|S=s,W)]

Alternatively, we could estimate an analogous probability given , i.e.,

EW[P(Y=1|S≥s,W)]

The latter estimate is closer to what regulators use, since there is interest in the probability of the event given the correlate S is at least some threshold value, s. This analysis allows us to model different threshold values. Each of these parameters is estimated based on a standard logistic regression fit, averaging, and use of some estimator for the conditional density f(s|W).

Another option is to try a nonparametric targeted maximum likelihood estimation (TMLE) approach to estimation of the parameter based on S>=s.

Any comparison must take into account differences in study design between the human study and the NHP study, and proper caveats should be given. For example, if the human study is the correlates study that combines data from several large randomized trials, then the report should be clear about the differences between the outcomes from that study and this NHP study (e.g., the human correlates study is a natural infection study, and the NHP study is a challenge study, etc.).

## **6.10** **Machine Learning Approach**

If there is a reasonably highly multivariate set of markers, a statistical/machine learning approach may be considered to combine predictiveness of different sets of immune markers, with the different sets defined by each assay and biological hypotheses (for example, similar to the analysis used by Neidich et al,. 2019). The incorporation of baseline variables into the model such as sex and age may additionally be explored. Dose information will be excluded from the analysis.

Elastic Net or LASSO regression may be used to evaluate multiple correlates at once. LASSO is a parsimonious selection system that will pick only 1 member of a set of predictors that are correlated with each other, generating a minimal set of variables. Elastic Net is a slightly less parsimonious method that will group similar variables together and select one from each group. All predictors will be normalized to a mean of 0 and a standard deviation of 1 prior to selection. Each immune correlate at each measured pre-challenge timepoint will be treated as a separate predictor variable, similar to the method described in Chen et al., 2014. For numeric responses, the multiple marker variables will be used in a linear model and selected by some measure to prevent overfitting (e.g., cross validation with predictive accuracy evaluated by using R-squared). For binary responses, selected variables will then be used in a standard logistic regression model and also be selected to ensure no overfitting (e.g., using cross validation with coefficient for discrimination).

# 6.11 Sample Size

Previous NPH studies of vaccines with sample sizes of 24 (Corbett, et al., 2020) and 16 (Guebre-Xabier, et al., 2020) had sufficient sample sizes to obtain a clear signal. The sample size of the current study will have between 26 and 32 NHPs per vaccine product, plus 16 NHPs randomized to placebo, for a total of 126 animals. Therefore, there should be sufficient sample sizes to explore these correlates of risk and protection models.

# Additional Exploratory Analyses

Additional exploratory analyses may be performed. For example, the duration of outcome may be modeled using immune markers. Additionally, future scientific questions may motivate other exploratory analyses.

- 1. **Methods for Handling Missing Data and Deviated Data**

No imputation of missing data will be performed; animals with missing data for a parameter required for a particular analysis will be excluded from that analysis. Individual animals may be excluded because of missing data or other reasons that will be well documented before the analysis is conducted.

If a data point is an outlier it will continue to be included in the analysis unless the reason that it is an outlier is due to a known error in the assay or the measuring device. Some analyses may be redone without outliers as sensitivity analyses.

# REFERENCES

Caruso, J. C. and Cliff, N. (1997), Empirical size, coverage, and power of confidence intervals for Spearman's Rho," Educational and Psychological Measurement, 57, 637-654.

Chan, J. F. W., Zhang, A. J., Yuan, S., Poon, V. K. M., Chan, C. C. S., Lee, A. C. Y., ... & Liang, R. (2020). Simulation of the clinical and pathological manifestations of Coronavirus Disease 2019 (COVID-19) in golden Syrian hamster model: implications for disease pathogenesis and transmissibility. Clinical Infectious Diseases.

Chandrashekar, A., Liu, J., Martinot, A. J., McMahan, K., Mercado, N. B., Peter, L., ... & Busman-Sahay, K. (2020). SARS-CoV-2 infection protects against rechallenge in rhesus macaques. Science. 369, 812–817.

Corbett, K. S., Flynn, B., Foulds, K. E., Francica, J. R., Boyoglu-Barnum, S., Werner, A. P., ... & Nagata, B. M. (2020). Evaluation of the mRNA-1273 vaccine against SARS-CoV-2 in nonhuman primates. New England Journal of Medicine.

Fay, M. P., Follmann, D. A., Lynn, F., Schiffer, J. M., Stark, G. V., Kohberger, R., Quinn, CP, & Nuzum, E. O. (2012). Anthrax vaccine–induced antibodies provide cross-species prediction of survival to aerosol challenge. Science translational medicine, 4(151), 151ra126-151ra126.

Fay , M. P. and Graubard (2001). Small-Sample Adjustments for Wald-Type Tests Using Sandwich Estimators. Biometrics 57: 1198-1206.

Fay M.P. (2005). Random marginal agreement coefﬁcients: rethinking the adjustment for chance when measuring agreement. Biostatistics 6(1):171-180.

FDA Guidance: Product Development Under the Animal Rule, October 2015. <http://www.fda.gov/Drugs/GuidanceComplianceRegulatoryInformation/Guidances/default.htm> .

Fong, Y., Huang, Y., Gilbert, P. B., & Permar, S. R. (2017). chngpt: threshold regression model estimation and inference. *BMC bioinformatics*, *18*(1), 454.

Guebre-Xabier, M., Patel, N., Tian, J. H., Zhou, B., Maciejewski, S., Lam, K., ... & Smith, G. (2020). NVX-CoV2373 vaccine protects cynomolgus macaque upper and lower airways against SARS-CoV-2 challenge. *Vaccine*, *38*(50), 7892-7896.

Johansen, M. D., Irving, A., Montagutelli, X., Tate, M. D., Rudloff, I., Nold, M. F., ... & Faiz, A. (2020). Animal and translational models of SARS-CoV-2 infection and COVID-19. Mucosal immunology, 1-15.

MacKinnon J.G., White H (1985). “Some Heteroskedasticity-Consistent Covariance Matrix Estimators with Improved Finite Sample Properties.” Journal of Econometrics, 29, 305– 325.

McMahan, Katherine, Jingyou Y., Mercado, N.B., Loos, C., Tostanoski, L.H., Chandrashekar, A., Liu, J. et al. "Correlates of protection against SARS-CoV-2 in rhesus macaques." *Nature* (2020): 1-5.

Mercado, N. B., Zahn, R., Wegmann, F., Loos, C., Chandrashekar, A., Yu, J., ... & He, X. (2020). Single-shot Ad26 vaccine protects against SARS-CoV-2 in rhesus macaques. Nature,

[https://doi.org/10.1038/s41586-020-2607-z](https://doi.org/10.1038/s41586-020-2607-z%20) .

Munster, V. J., Feldmann, F., Williamson, B. N., van Doremalen, N., Pérez-Pérez, L., Schulz, J., ... & Avanzato, V. A. (2020). Respiratory disease in rhesus macaques inoculated with SARS-CoV-2. Nature, <https://doi.org/10.1038/s41586-020-2324-7>.

Muggeo, V. (2020) Selecting number of breakpoints in segmented regression: implementation in the R package segmented <https://www.researchgate.net/publication/343737604>

Neidich, S. D., Fong, Y. Li,S.S., Geraghty, D.E., Williamson, B.D., Young, W.C., Goodman, D. et al. "Antibody Fc effector functions and IgG3 associate with decreased HIV-1 risk." *Journal of Clinical Investigation* 129, no. 11 (2019): 4838-4849.

Plotkin, S. A., and Gilbert, P. B. (2012). Nomenclature for immune correlates of protection after vaccination. Clinical Infectious Diseases, 54(11), 1615-1617.

Qin, L., Gilbert, P. B., Corey, L., McElrath, M. J., and Self, S. G. (2007). A framework for assessing immunological correlates of protection in vaccine trials. The Journal of infectious diseases, 196(9), 1304-1312.

Ritz, C., Baty, F., Streibig, J.C., and Gerhard, D. (2015). Dose-Response Analysis Using R. PLoS ONE, 10(12), 1-13.

Tjur, T. (2009). Coefficients of determination in logistic regression models—A new proposal: The coefficient of discrimination. The American Statistician, 63(4), 366-372.

White, Halbert. (1996). Estimation, inference and specification analysis. No. 22. Cambridge University Press.

Zeileis, A. (2004). Econometric Computing with HC and HAC Covariance Matrix Estimators. Journal of Statistical Software. Vol 11, Issue 10.

Zheng, W. and van der Laan, M.J. (2012), Targeted maximum likelihood estimation of natural direct effects," The International Journal of Biostatistics, 8.
