# Supplementary material for: Humoral Immune Correlates Analysis of Four Vaccines Against SARS-CoV-2 in Rhesus Macaques
Source: Research Square preprint supplement (doi:10.21203/rs.3.rs-9404931/v1), 2026-04-30
Supplement: Supplementary file 2 [file 41fa290a7d8ccb22c5f3625e.pdf]

## CoP SAP 6.3

Allyson Mateja

July 07, 2023

### 6.3 Dose-Response Effects of Vaccine Product on Virus Specific Antibody or Viral Load

The expectation is that there will be a significant dose-response effect for both the virus-specific antibodies and the viral load. For each virus-specific antibody or viral load, a test for a dose response will be performed. Since each vaccine product will have its own set of dose dilutions, we define a separate dose score for each vaccine. Let  $D_{Aj}$  be the  $j^{th}$  dose for vaccine A, and let  $D_{A,min}$  be the minimum dose (i.e., the most diluted dose) of vaccine A, then the corresponding dose score is:

$$d_{Aj} = \log_{10}\left(\frac{10 * D_{Aj}}{D_{A,min}}\right)$$

Thus, the dose score associated with the minimum dose will always be 1, and the dose 10 times larger will be 2, etc. We define the dose score for the placebo group to be 0, which is functionally equivalent to a 10-fold dilution of the minimum dose for each vaccine. Most vaccines will be given as two immunizations. For those animals that are given as only 1 immunization, we will define two vaccine scores: (1) same as above (i.e., animals that are given 1 immunization of dose x, will have the same dose score as animals that have 2 immunizations [prime+boost] of dose x), or (2) the values associated with one scheduled immunization have their dose divided by 2 (because the cumulative dose is half as much as those that get two scheduled immunizations). Alternatively, some analyses may leave out animal groups that only received one immunization.

For the remainder of this report, the dose score calculated in the normal way will be referred to as the “original dose score”, and the dose score where the single dose group has the dose divided by 2 will be referred to as the “single dose halved dose score”.

Initially, within each vaccine product a Spearman correlation (i.e., rank correlation) of the dose score with the virus-specific antibody or viral load will be performed. This is a check that the virus-specific antibody and viral load are associated with vaccine dose in a monotonic way. Then, the overall Spearman correlation with all vaccine product and the placebo arms included will be done.

We graphically plot the virus specific antibody and viral load by dose score, with geometric means and 95% confidence intervals within each dose score/vaccine product group, using the original dose score.

Next we fit a linear model on the log of the viral load, where the model for the mean will include an intercept, and the dose scores are treated as numeric allowing a different dose parameter for each vaccine product. This model will allow a calibration of each dose score to its vaccine product. Let  $y_{jk}$ ,  $v_{jk}$ , and  $d_{jk}$ , be the numeric viral load, vaccine product, and dose score, respectively for the  $k^{th}$  animal in the  $j^{th}$  vaccine dose group (where a vaccine dose group is defined by a row in Table 1, except placebos that are all combined). Then the model is:

$$\log_{10}(y_{jk}) = \beta_0 + \beta_1 d_{jk} I(v_{jk} = A) + \beta_2 d_{jk} I(v_{jk} = B) + \beta_3 d_{jk} I(v_{jk} = C) + \beta_4 d_{jk} I(v_{jk} = D)$$

where  $I(S) = 1$  if statement S is true, and 0 otherwise.

This will be fit with a generalized estimating equation (GEE) model with the data clustered by challenge day groupings (see groups defined in Table 3) using a working independence variance model. Because the GEE model uses a sandwich estimator of variance, it allows for misspecification of the model. Typically, the GEE

models are presumed as misspecifying the variance with a “working variance” model; however, sandwich estimators also work for misspecifying the mean (see e.g., White, 1996). For example, if the models for the CoR predicting the viral load are similar but slightly different for different vaccine product, then the model without vaccine product information will be misspecified and will measure a kind of average effect. Because GEE methods are typically anti-conservative, inferences adjusted for small samples will be made using the `saws` R package with the default method (Fay and Graubard, 2001).

A: Janssen

B: Moderna

C: Novavax

D: Sanofi

For binary variables, when possible (i.e., when not all of the binary responses are the same), within each vaccine product a dose-response will be evaluated by a Wilcoxon-Mann-Whitney (WMW) test comparing the dose score of animals with a positive signal to those with a negative signal. NA is indicated when the binary responses are the same. Then, the overall MW test with all vaccine product and the placebo arms included will be done.

We graphically plot the virus-specific antibody for each vaccine product, stratified by animals with a positive signal and animals with a negative signal.

As a combined analysis, a GEE logistic regression will be used when possible. The linear predictor portion of the model will be the same as numeric viral load. The model will be fit with a GEE model with the data clustered by challenge day groupings using a working independence variance model and the `saws` adjustment for small samples as with numeric viral load.

## Dose Response on Virus Specific Antibody

### Correlations

#### By Vaccine Product

Table 6.3.1: Spearman Correlation of Dose Score with Virus Specific Antibody By Vaccine

|                                              | Janssen<br>Original<br>Dose<br>Score | Janssen<br>Single<br>Dose<br>Halved<br>Dose<br>Score | Janssen<br>Single<br>Dose<br>Removed | Moderna                 | Novavax                  | Sanofi                   |
|----------------------------------------------|--------------------------------------|------------------------------------------------------|--------------------------------------|-------------------------|--------------------------|--------------------------|
| log MN 2 weeks<br>prior challenge            | 0.43<br>(0.09,<br>0.68)              | 0.55<br>(0.25,<br>0.75)                              | -0.43<br>(-0.83,<br>0.27)            | 0.81<br>(0.62,<br>0.91) | 0.34<br>(-0.06,<br>0.64) | 0.31<br>(-0.09,<br>0.62) |
| log MN day<br>challenge                      | 0.33<br>(-0.02,<br>0.61)             | 0.46<br>(0.13,<br>0.7)                               | 0.37<br>(-0.34,<br>0.81)             | 0.76<br>(0.53,<br>0.89) | 0.32<br>(-0.08,<br>0.63) | 0.15<br>(-0.25,<br>0.51) |
| log MSD ECL 2<br>weeks prior<br>challenge    | 0.53<br>(0.22,<br>0.74)              | 0.64<br>(0.38,<br>0.81)                              | 0.43<br>(-0.28,<br>0.83)             | 0.85<br>(0.69,<br>0.93) | 0.17<br>(-0.23,<br>0.52) | 0.52<br>(0.16,<br>0.75)  |
| log MSD ECL day<br>challenge                 | 0.57<br>(0.28,<br>0.77)              | 0.63<br>(0.37,<br>0.8)                               | 0 (-0.63,<br>0.63)                   | 0.86<br>(0.71,<br>0.93) | 0.24<br>(-0.16,<br>0.58) | 0.6 (0.28,<br>0.8)       |
| log PsVNA ID50<br>2 weeks prior<br>challenge | 0.42<br>(0.08,<br>0.67)              | 0.57<br>(0.27,<br>0.76)                              | 0.5<br>(-0.19,<br>0.86)              | 0.8 (0.59,<br>0.9)      | 0.17<br>(-0.23,<br>0.52) | 0.35<br>(-0.05,<br>0.65) |
| log PsVNA ID50<br>day challenge              | 0.46<br>(0.13,<br>0.7)               | 0.6 (0.31,<br>0.78)                                  | 0.43<br>(-0.28,<br>0.83)             | 0.74<br>(0.49,<br>0.87) | 0.28<br>(-0.12,<br>0.6)  | 0.33<br>(-0.06,<br>0.64) |
| log PsVNA ID80<br>2 weeks prior<br>challenge | 0.6 (0.31,<br>0.78)                  | 0.71<br>(0.47,<br>0.85)                              | 0.57<br>(-0.1,<br>0.88)              | 0.81<br>(0.62,<br>0.91) | 0.21<br>(-0.2,<br>0.55)  | 0.43<br>(0.05,<br>0.7)   |
| log PsVNA ID80<br>day challenge              | 0.63<br>(0.37,<br>0.81)              | 0.74<br>(0.52,<br>0.86)                              | 0.5<br>(-0.19,<br>0.86)              | 0.84<br>(0.67,<br>0.93) | 0.27<br>(-0.13,<br>0.59) | 0.39 (0,<br>0.67)        |

## Overall

Table 6.3.2: Spearman Correlation of Dose Score with Virus-Specific Antibody Overall

|                                        | Original Dose Score | Single Dose Halved Dose Score | Single Dose Group Removed |
|----------------------------------------|---------------------|-------------------------------|---------------------------|
| log MN 2 weeks prior challenge         | 0.69 (0.58, 0.77)   | 0.7 (0.6, 0.78)               | 0.68 (0.56, 0.77)         |
| log MN day challenge                   | 0.65 (0.54, 0.74)   | 0.68 (0.57, 0.76)             | 0.66 (0.54, 0.76)         |
| log MSD ECL 2 weeks prior challenge    | 0.7 (0.59, 0.78)    | 0.7 (0.59, 0.78)              | 0.72 (0.61, 0.8)          |
| log MSD ECL day challenge              | 0.71 (0.62, 0.79)   | 0.71 (0.61, 0.79)             | 0.72 (0.61, 0.8)          |
| log PsVNA ID50 2 weeks prior challenge | 0.63 (0.51, 0.72)   | 0.63 (0.51, 0.72)             | 0.69 (0.57, 0.78)         |
| log PsVNA ID50 day challenge           | 0.61 (0.49, 0.71)   | 0.61 (0.48, 0.71)             | 0.65 (0.53, 0.75)         |
| log PsVNA ID80 2 weeks prior challenge | 0.69 (0.59, 0.77)   | 0.7 (0.6, 0.78)               | 0.72 (0.61, 0.8)          |
| log PsVNA ID80 day challenge           | 0.7 (0.59, 0.78)    | 0.7 (0.6, 0.78)               | 0.69 (0.57, 0.78)         |

## Plots

Displayed below are geometric means and the corresponding 95% confidence intervals.

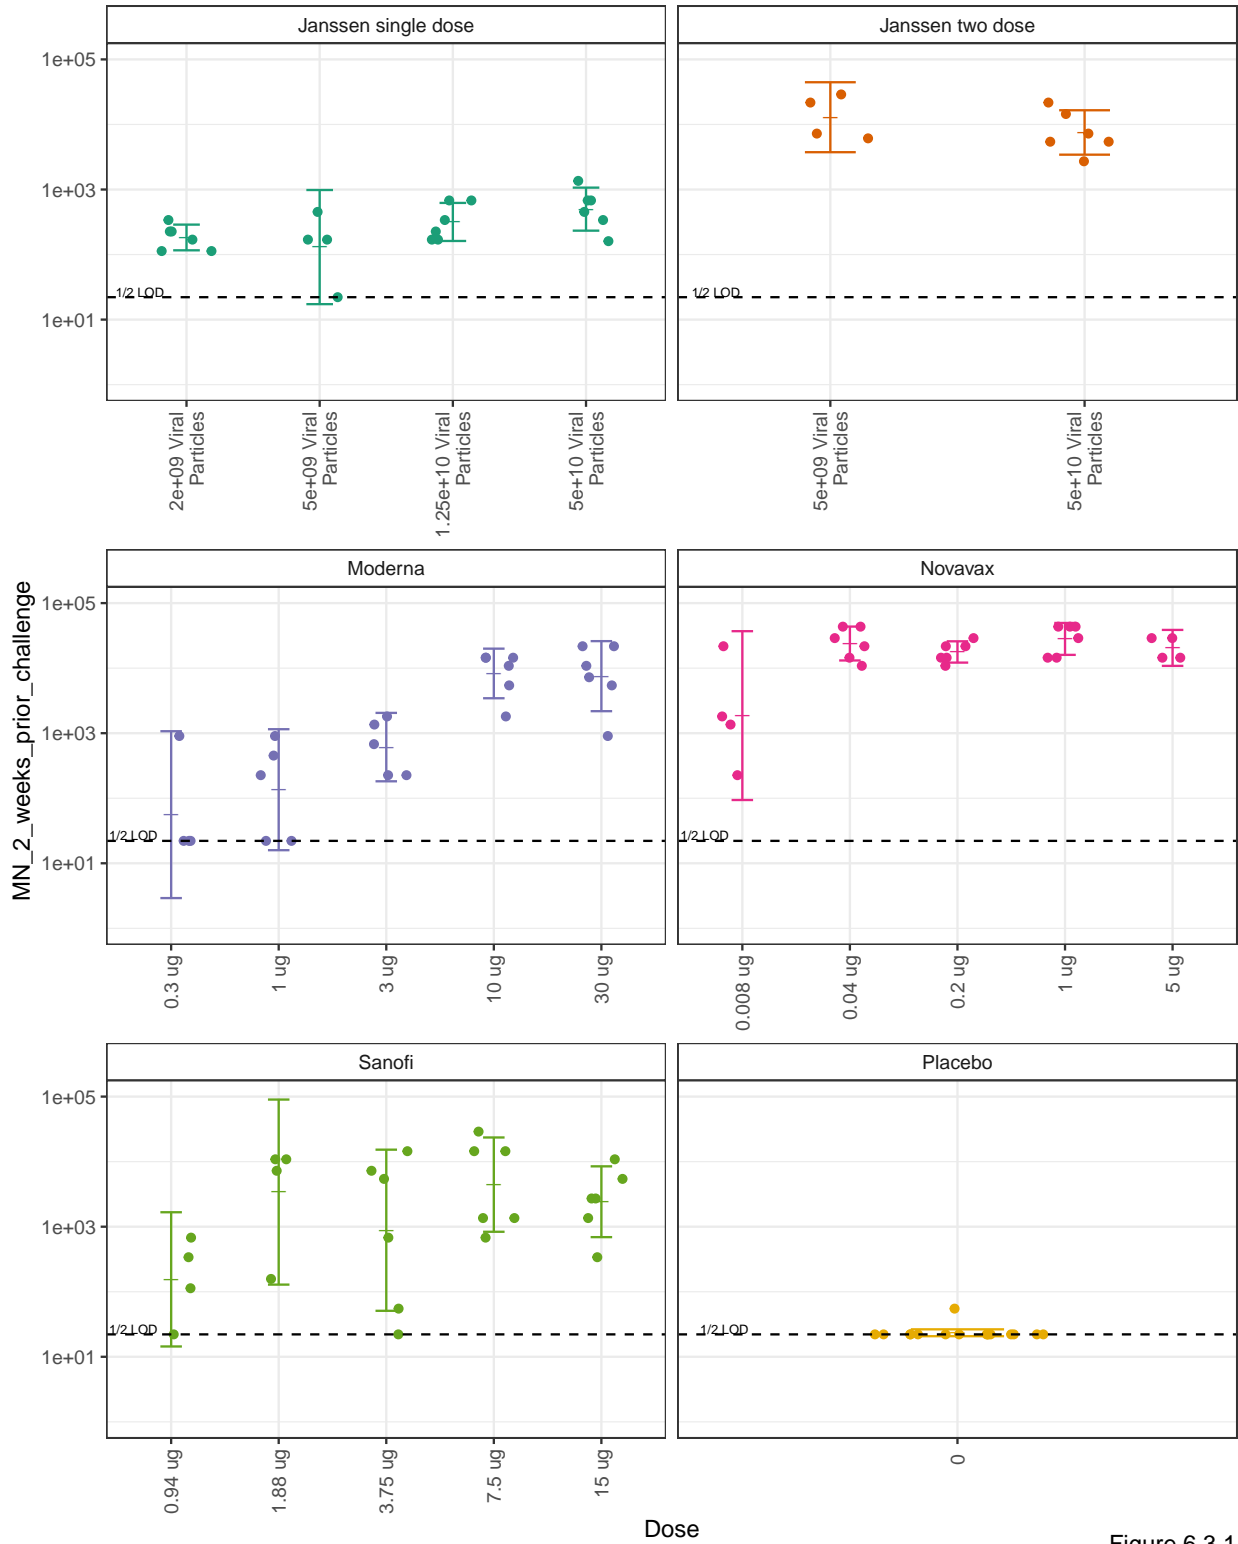

Figure 6.3.1

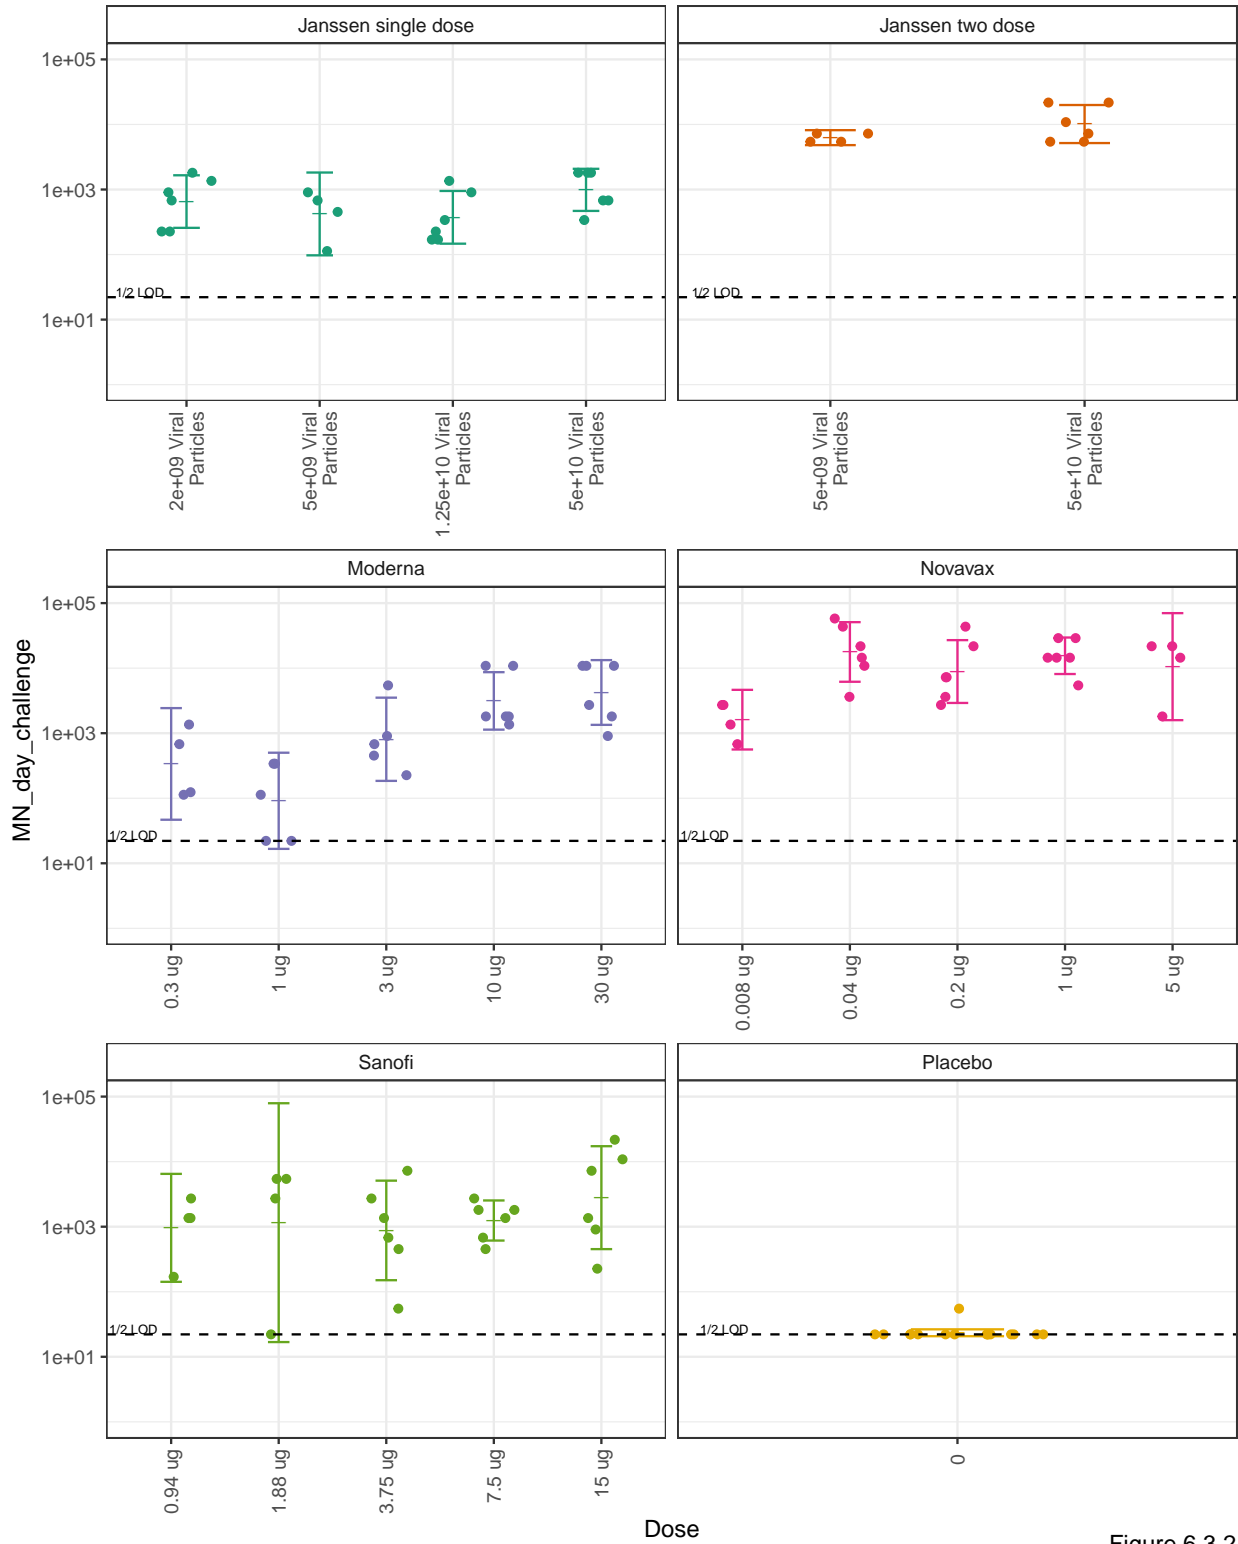

Figure 6.3.2

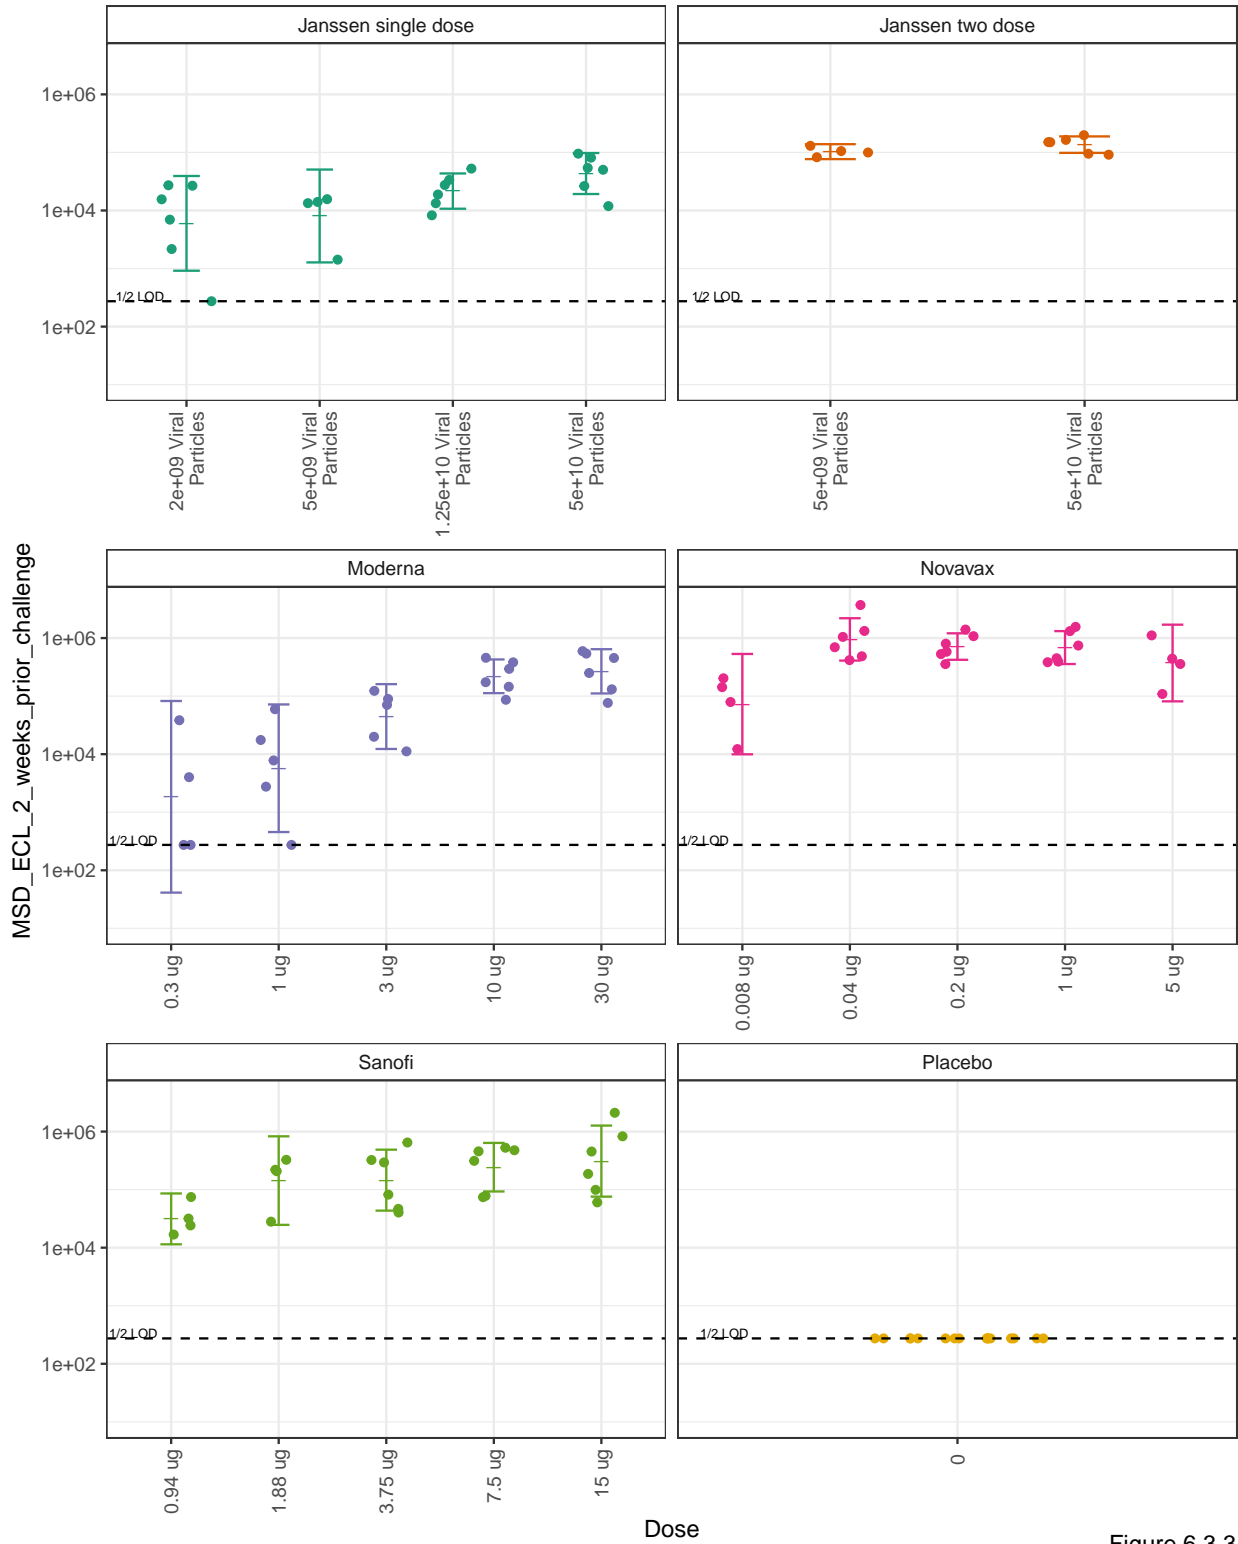

Figure 6.3.3

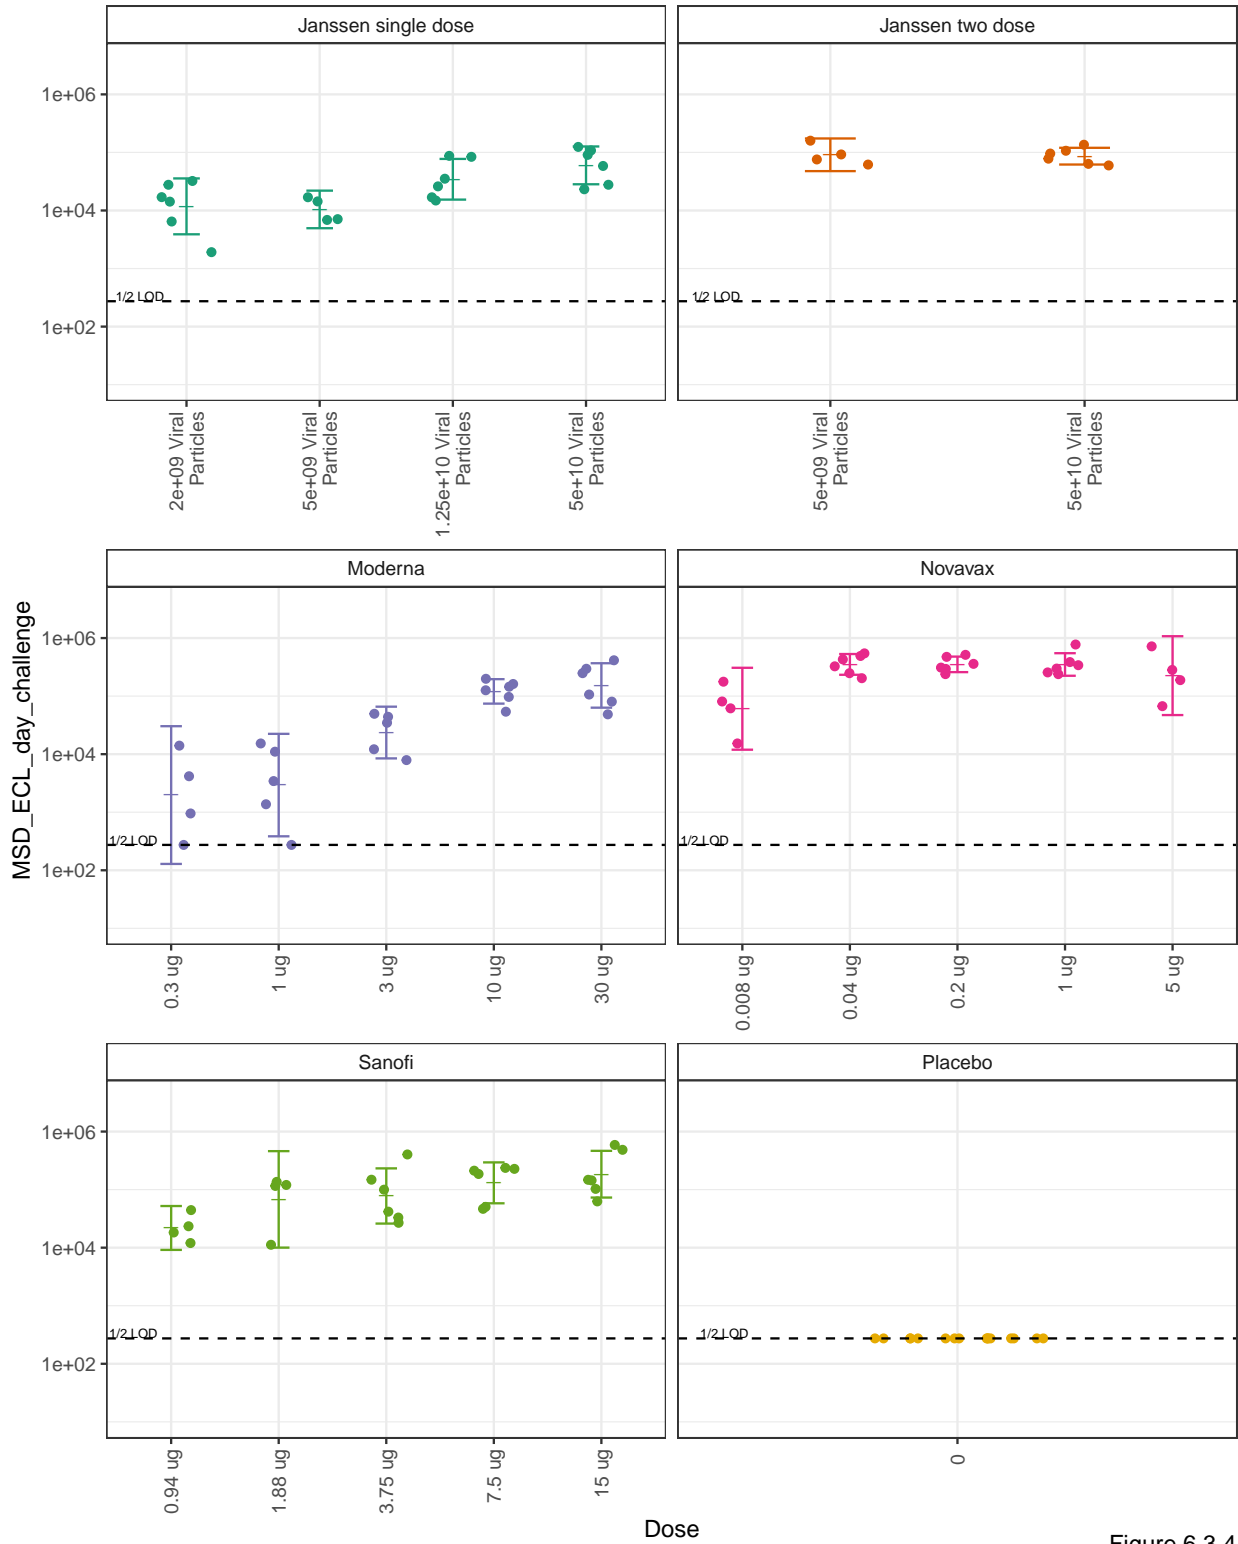

Figure 6.3.4

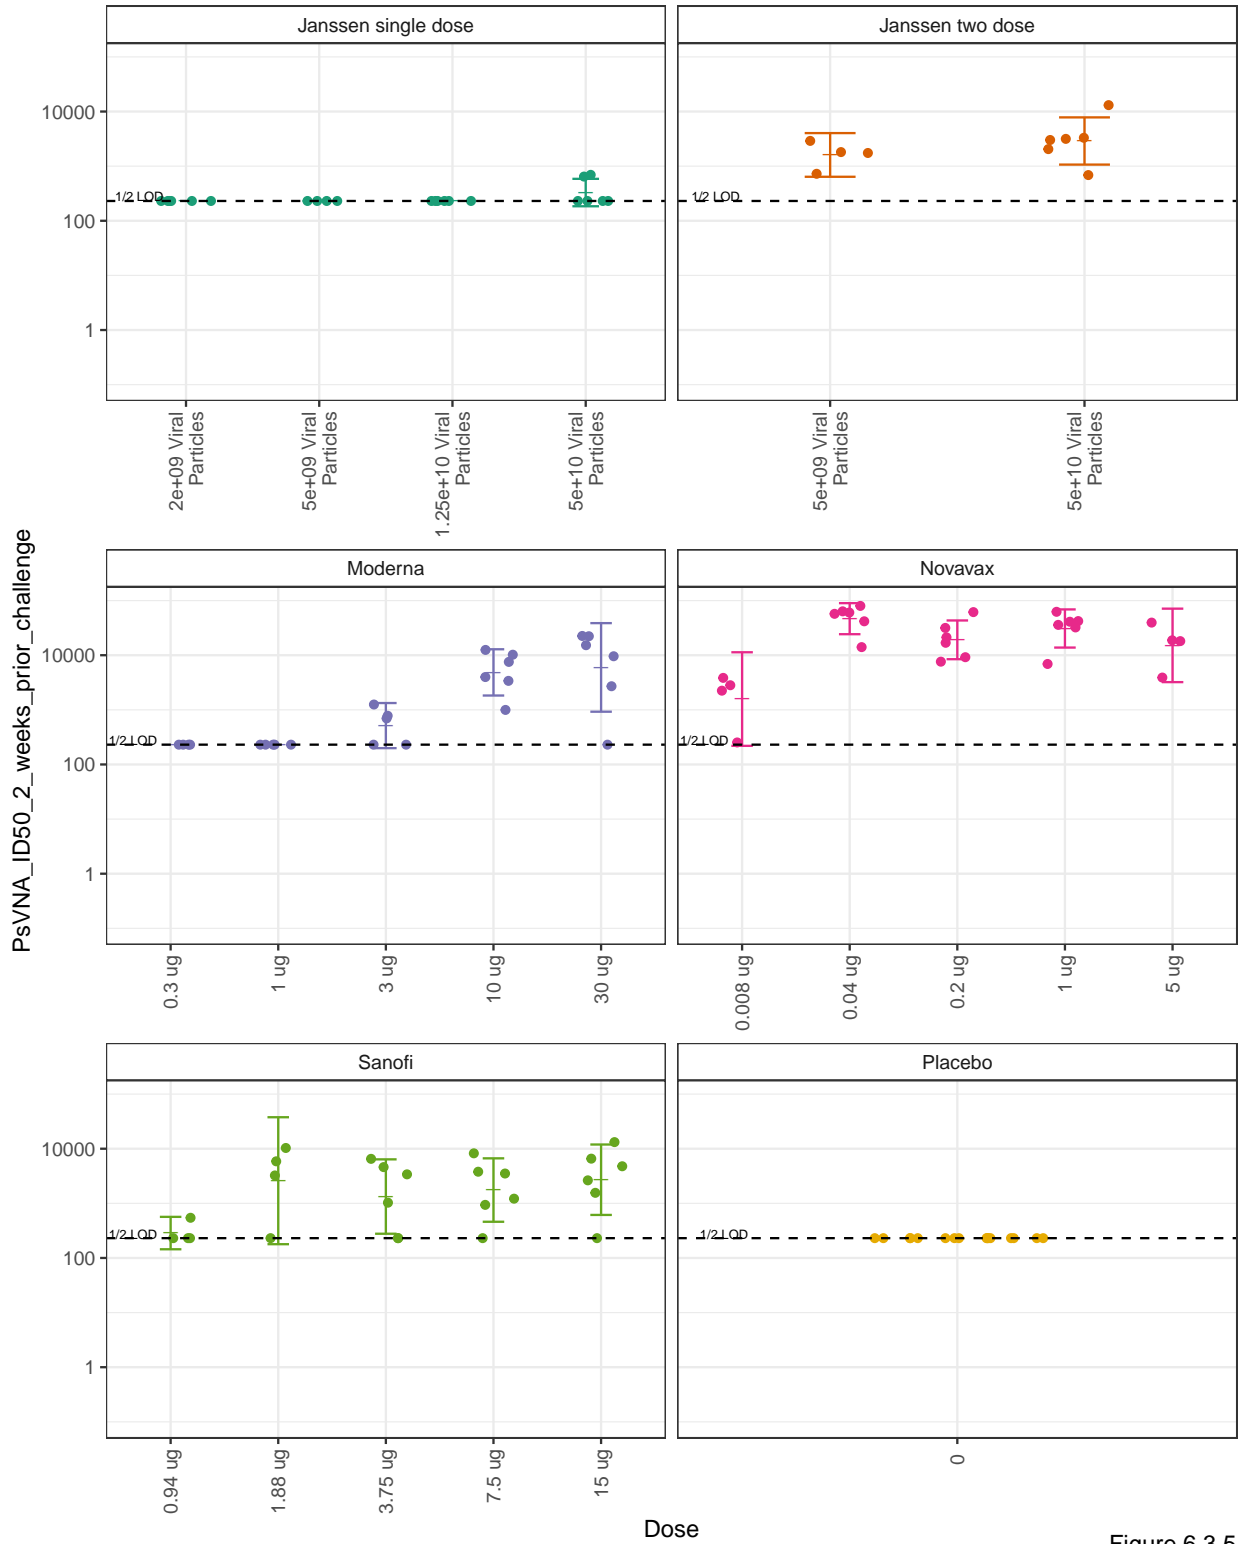

Figure 6.3.5

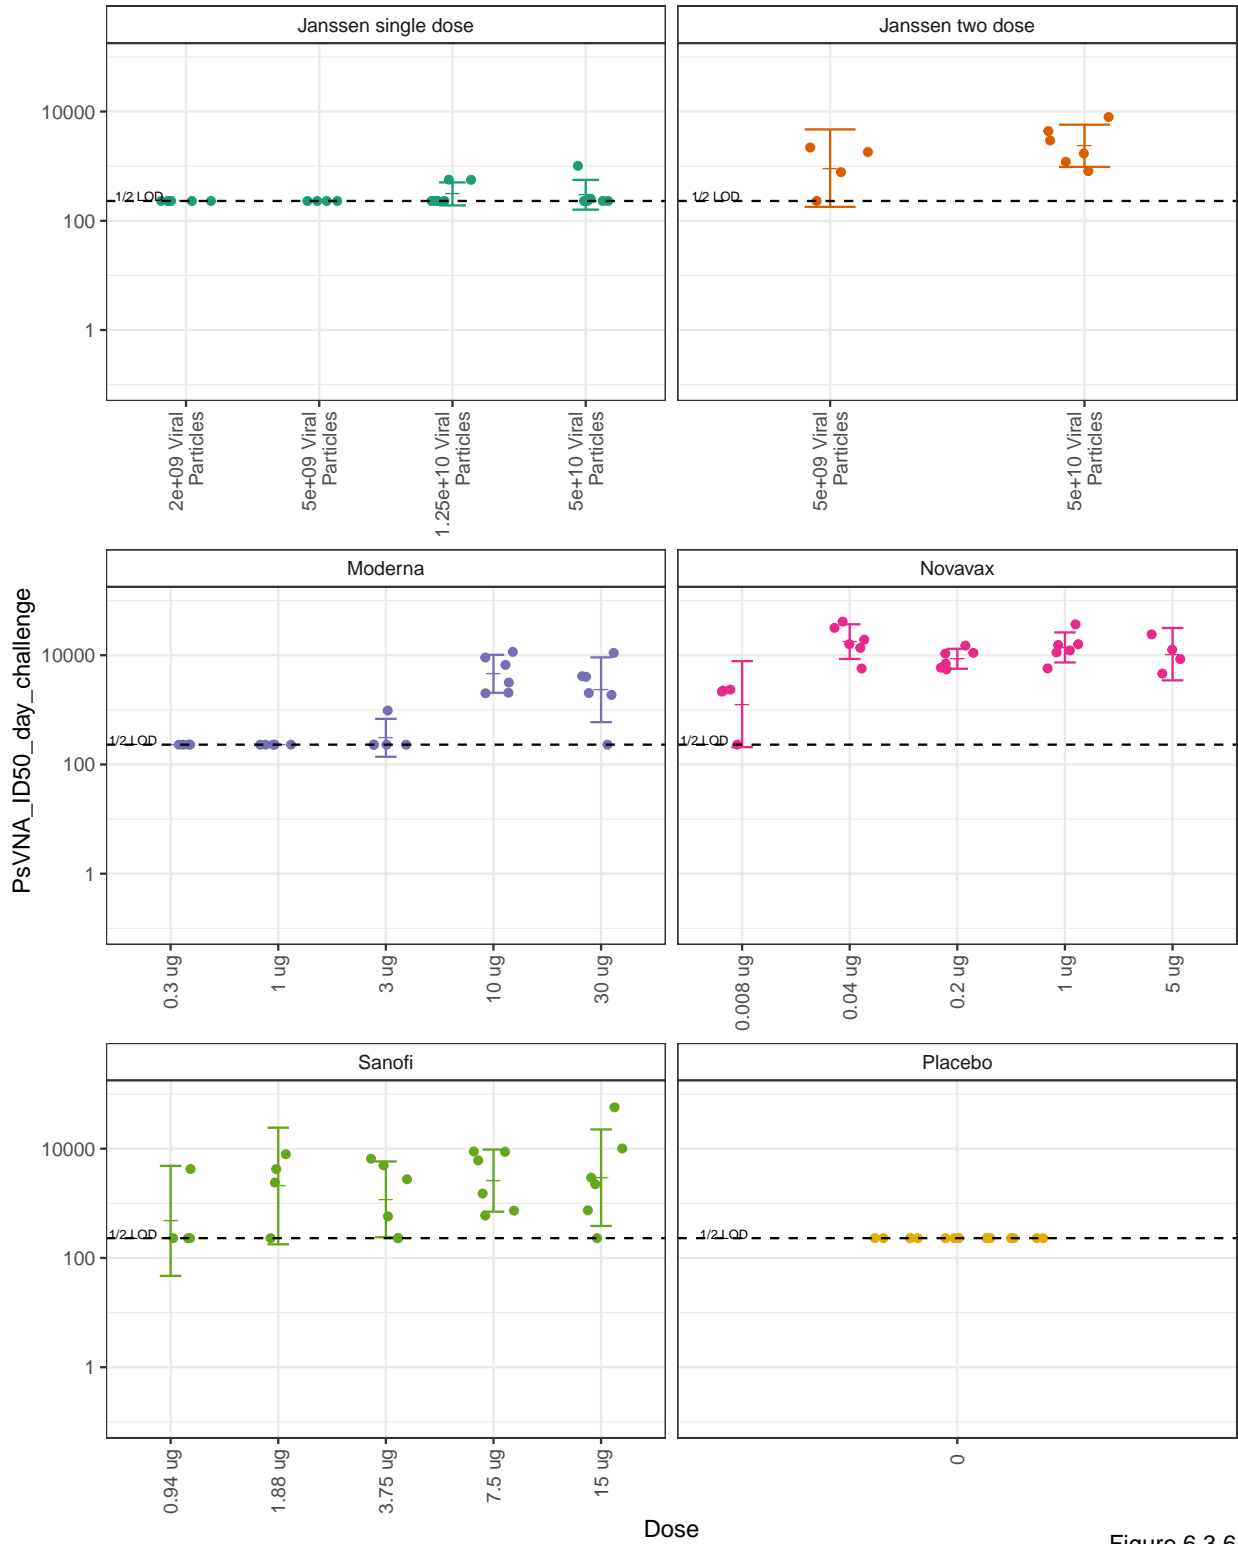

Figure 6.3.6

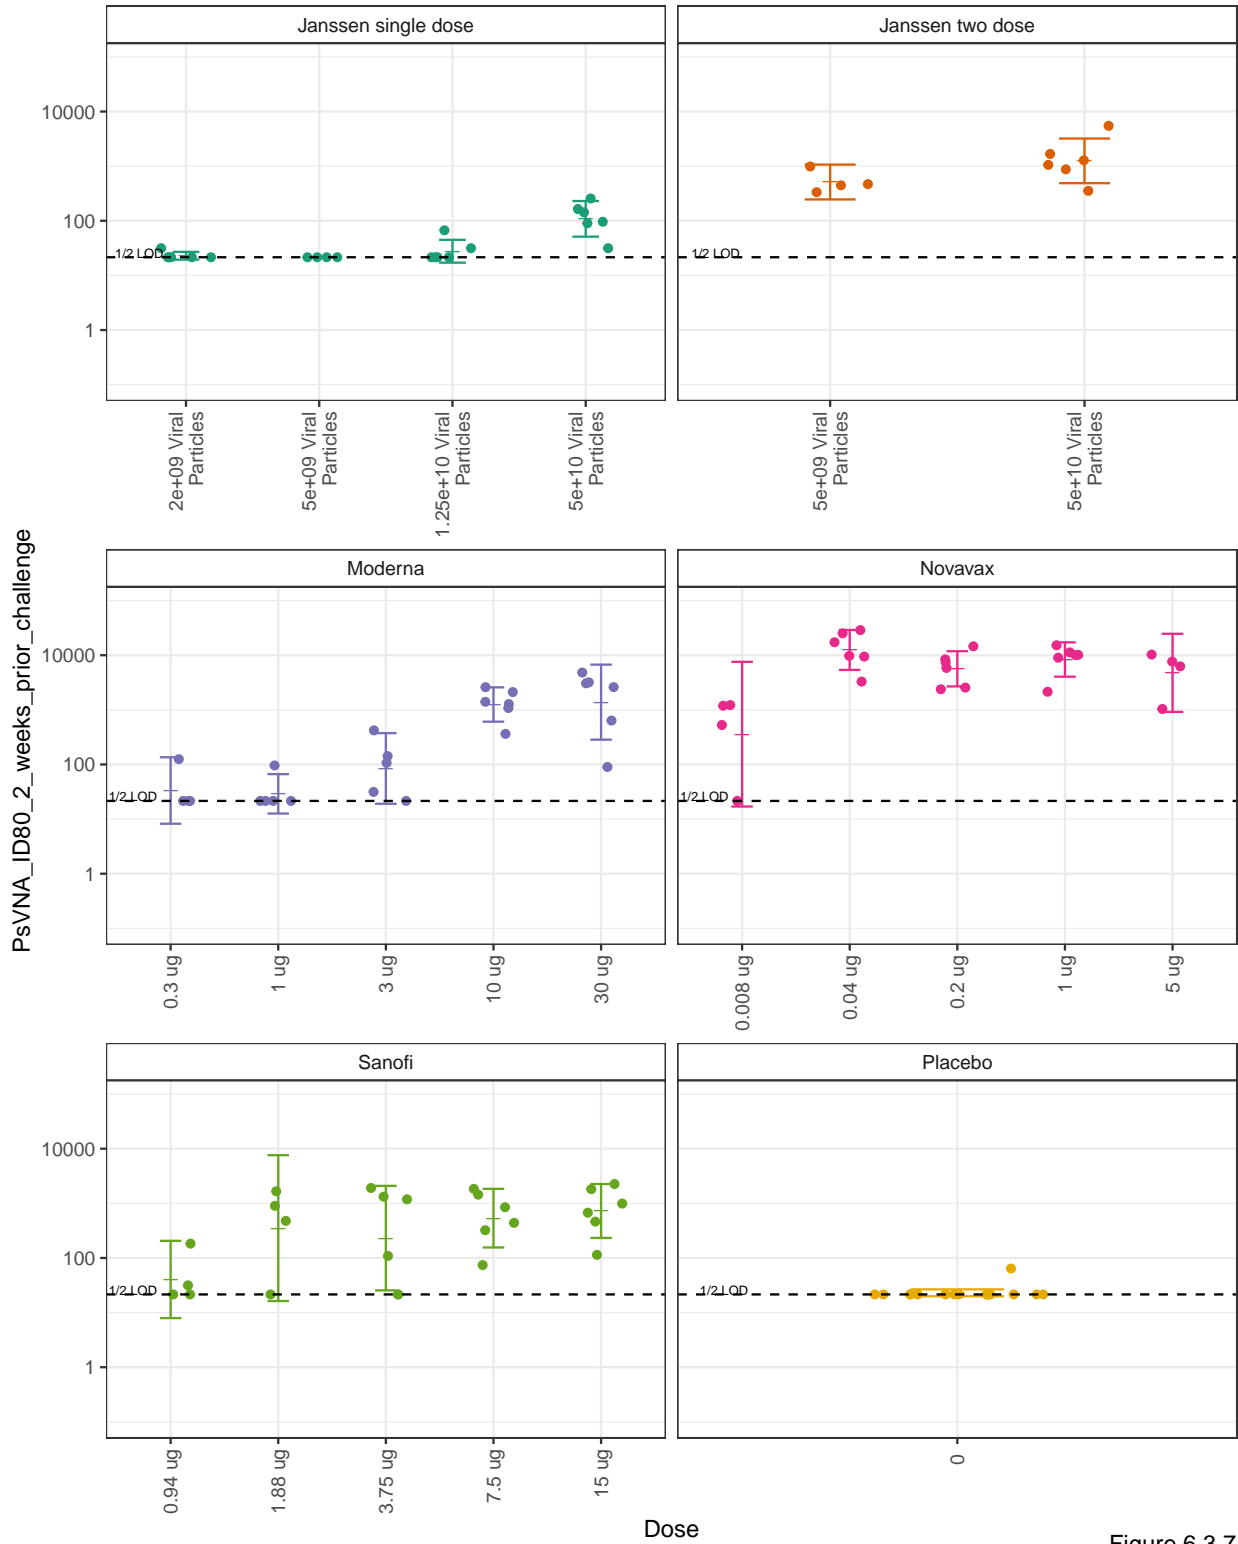

Figure 6.3.7

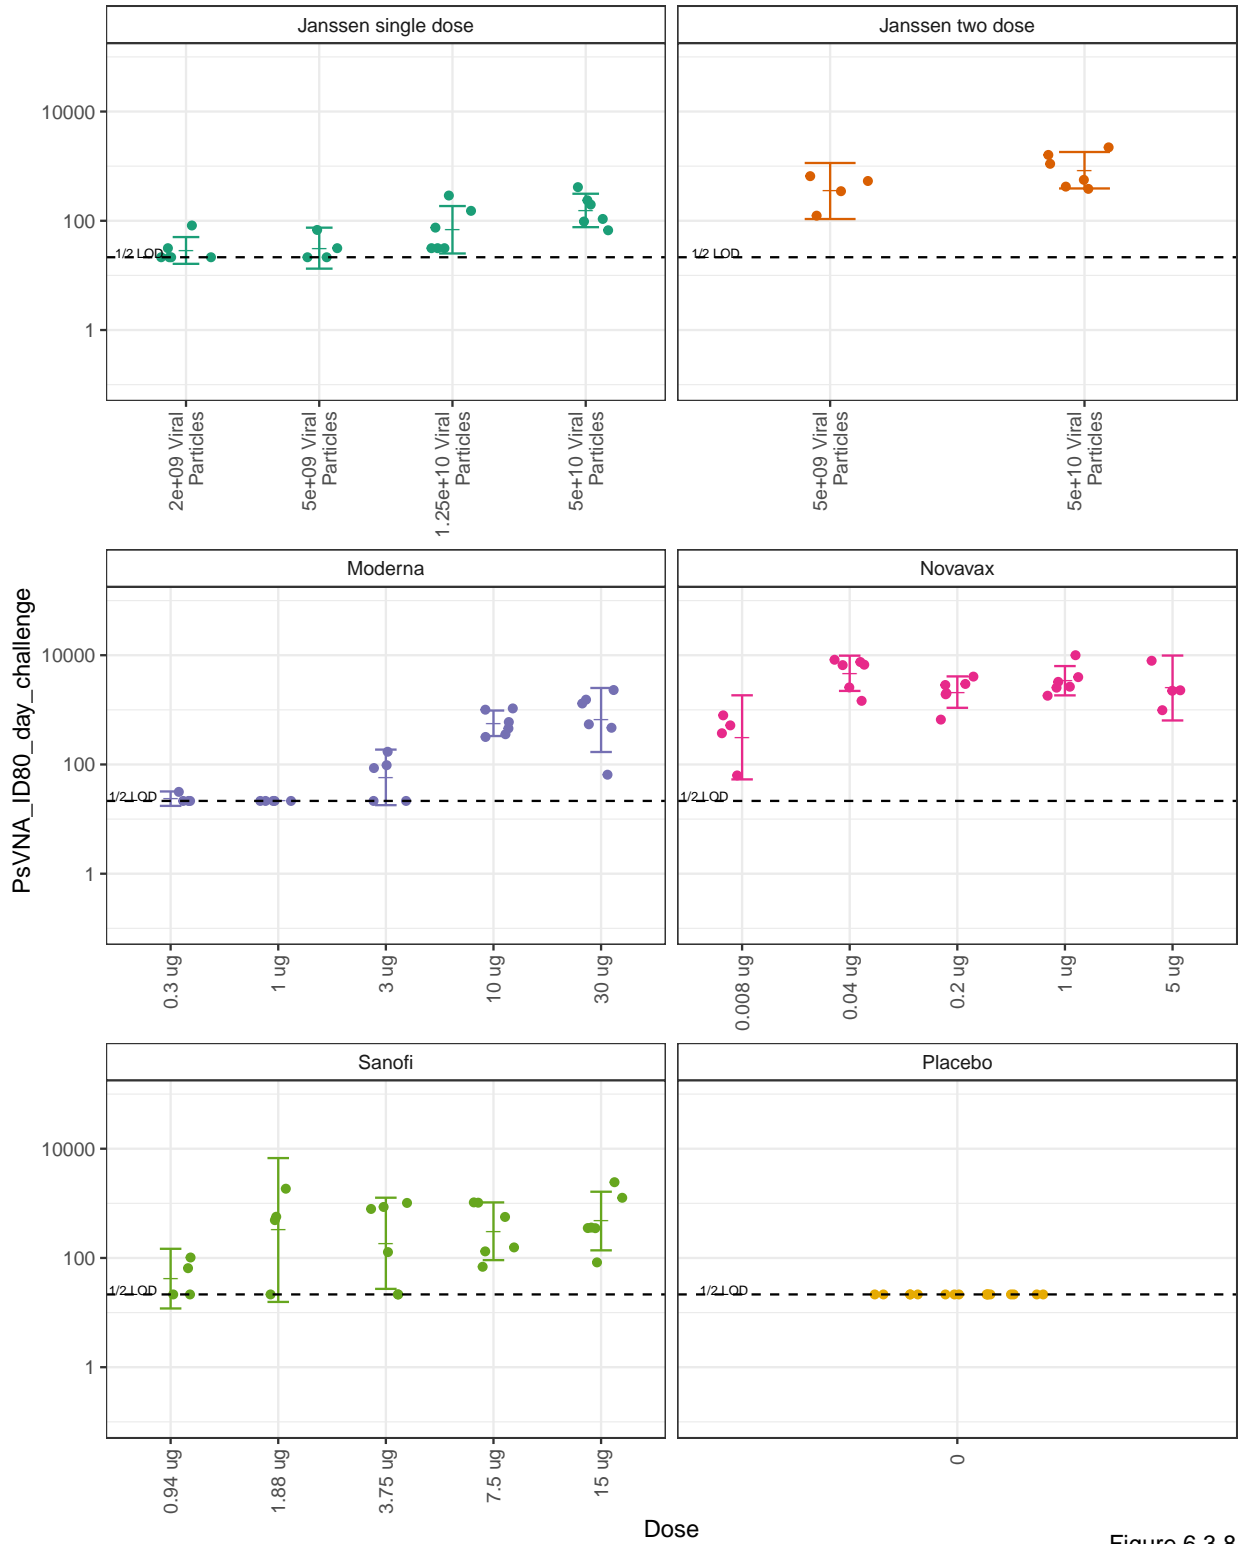

Figure 6.3.8

## Dose Response on Viral Load - Numeric

### Correlations

#### By Vaccine Product

Table 6.3.3: Spearman Correlation of Dose Score with Viral Load By Vaccine

|                                                         | Janssen<br>Original<br>Dose<br>Score | Janssen<br>Single<br>Dose<br>Halved<br>Dose<br>Score | Janssen<br>Single<br>Dose<br>Removed | Moderna                    | Novavax                   | Sanofi                    |
|---------------------------------------------------------|--------------------------------------|------------------------------------------------------|--------------------------------------|----------------------------|---------------------------|---------------------------|
| AUC BAL N1                                              | 0 (-0.35,<br>0.35)                   | -0.09<br>(-0.42,<br>0.27)                            | 0.11<br>(-0.56,<br>0.69)             | -0.27<br>(-0.59,<br>0.14)  | -0.1<br>(-0.47,<br>0.3)   | -0.17<br>(-0.53,<br>0.23) |
| AUC BAL<br>Subgenomic                                   | 0.1<br>(-0.25,<br>0.44)              | 0.04<br>(-0.31,<br>0.38)                             | 0.23<br>(-0.47,<br>0.75)             | -0.37<br>(-0.66,<br>0.02)  | -0.09<br>(-0.46,<br>0.31) | -0.08<br>(-0.45,<br>0.32) |
| AUC Nasal Swab<br>N1                                    | -0.21<br>(-0.52,<br>0.15)            | -0.28<br>(-0.57,<br>0.07)                            | -0.36<br>(-0.8,<br>0.35)             | -0.54<br>(-0.77,<br>-0.2)  | -0.21<br>(-0.55,<br>0.2)  | -0.26<br>(-0.59,<br>0.14) |
| AUC Nasal Swab<br>Subgenomic                            | -0.22<br>(-0.53,<br>0.14)            | -0.28<br>(-0.57,<br>0.08)                            | -0.21<br>(-0.74,<br>0.48)            | -0.53<br>(-0.76,<br>-0.19) | -0.23<br>(-0.57,<br>0.17) | -0.14<br>(-0.5,<br>0.26)  |
| AUC OP Swab N1                                          | -0.2<br>(-0.52,<br>0.15)             | -0.26<br>(-0.56,<br>0.1)                             | -0.14<br>(-0.71,<br>0.54)            | -0.34<br>(-0.64,<br>0.06)  | -0.19<br>(-0.53,<br>0.22) | -0.19<br>(-0.54,<br>0.22) |
| AUC OP Swab<br>Subgenomic                               | -0.27<br>(-0.56,<br>0.09)            | -0.3<br>(-0.59,<br>0.06)                             | -0.14<br>(-0.71,<br>0.54)            | -0.29<br>(-0.61,<br>0.11)  | -0.09<br>(-0.46,<br>0.31) | -0.26<br>(-0.59,<br>0.14) |
| log VL Day2<br>PostChallenge<br>BAL N1                  | 0.24<br>(-0.12,<br>0.54)             | 0.16<br>(-0.2,<br>0.48)                              | 0.11<br>(-0.56,<br>0.69)             | -0.24<br>(-0.58,<br>0.17)  | -0.03<br>(-0.41,<br>0.36) | -0.1<br>(-0.47,<br>0.3)   |
| log VL Day2<br>PostChallenge<br>BAL Subgenomic          | 0.17<br>(-0.19,<br>0.49)             | 0.11<br>(-0.24,<br>0.45)                             | 0.23<br>(-0.47,<br>0.75)             | -0.36<br>(-0.66,<br>0.04)  | -0.11<br>(-0.48,<br>0.29) | -0.09<br>(-0.46,<br>0.31) |
| log VL Day2<br>PostChallenge<br>OPswab N1               | -0.02<br>(-0.37,<br>0.33)            | -0.07<br>(-0.41,<br>0.28)                            | 0.61<br>(-0.04,<br>0.89)             | -0.18<br>(-0.53,<br>0.23)  | -0.23<br>(-0.57,<br>0.17) | -0.23<br>(-0.57,<br>0.17) |
| log VL Day2<br>PostChallenge<br>OPswab<br>Subgenomic    | -0.12<br>(-0.45,<br>0.24)            | -0.19<br>(-0.5,<br>0.17)                             | 0.76<br>(0.25,<br>0.94)              | -0.28<br>(-0.6,<br>0.12)   | -0.16<br>(-0.51,<br>0.24) | -0.32<br>(-0.63,<br>0.08) |
| log VL Day2<br>PostChallenge<br>NasalSwab N1            | -0.3<br>(-0.59,<br>0.06)             | -0.42<br>(-0.67,<br>-0.09)                           | 0 (-0.63,<br>0.63)                   | -0.52<br>(-0.75,<br>-0.16) | -0.17<br>(-0.52,<br>0.23) | -0.28<br>(-0.6,<br>0.12)  |
| log VL Day2<br>PostChallenge<br>NasalSwab<br>Subgenomic | -0.26<br>(-0.56,<br>0.1)             | -0.38<br>(-0.64,<br>-0.04)                           | 0.36<br>(-0.35,<br>0.81)             | -0.5<br>(-0.74,<br>-0.14)  | -0.1<br>(-0.47,<br>0.3)   | -0.33<br>(-0.63,<br>0.07) |

**Overall**

Table 6.3.4: Spearman Correlation of Dose Score with Viral Load Overall

|                                                         | Original Dose Score  | Single Dose Halved Dose Score | Single Dose Group Removed |
|---------------------------------------------------------|----------------------|-------------------------------|---------------------------|
| AUC BAL N1                                              | -0.42 (-0.55, -0.26) | -0.43 (-0.56, -0.28)          | -0.46 (-0.6, -0.29)       |
| AUC BAL<br>Subgenomic                                   | -0.39 (-0.53, -0.23) | -0.4 (-0.54, -0.24)           | -0.45 (-0.59, -0.28)      |
| AUC Nasal Swab<br>N1                                    | -0.51 (-0.63, -0.37) | -0.52 (-0.64, -0.38)          | -0.55 (-0.67, -0.4)       |
| AUC Nasal Swab<br>Subgenomic                            | -0.52 (-0.64, -0.38) | -0.53 (-0.64, -0.39)          | -0.54 (-0.66, -0.38)      |
| AUC OP Swab N1                                          | -0.48 (-0.6, -0.33)  | -0.48 (-0.61, -0.34)          | -0.51 (-0.64, -0.35)      |
| AUC OP Swab<br>Subgenomic                               | -0.45 (-0.58, -0.3)  | -0.45 (-0.58, -0.3)           | -0.47 (-0.61, -0.3)       |
| log VL Day2<br>PostChallenge<br>BAL N1                  | -0.33 (-0.48, -0.17) | -0.34 (-0.49, -0.18)          | -0.42 (-0.56, -0.24)      |
| log VL Day2<br>PostChallenge<br>BAL Subgenomic          | -0.34 (-0.49, -0.18) | -0.36 (-0.5, -0.19)           | -0.43 (-0.57, -0.25)      |
| log VL Day2<br>PostChallenge<br>OPswab N1               | -0.25 (-0.4, -0.07)  | -0.26 (-0.42, -0.09)          | -0.24 (-0.42, -0.05)      |
| log VL Day2<br>PostChallenge<br>OPswab<br>Subgenomic    | -0.3 (-0.45, -0.13)  | -0.31 (-0.46, -0.14)          | -0.28 (-0.45, -0.09)      |
| log VL Day2<br>PostChallenge<br>NasalSwab N1            | -0.55 (-0.66, -0.41) | -0.56 (-0.67, -0.43)          | -0.57 (-0.68, -0.42)      |
| log VL Day2<br>PostChallenge<br>NasalSwab<br>Subgenomic | -0.54 (-0.65, -0.4)  | -0.56 (-0.67, -0.42)          | -0.55 (-0.67, -0.4)       |

## Plots

Displayed below are geometric means and the corresponding 95% confidence intervals.

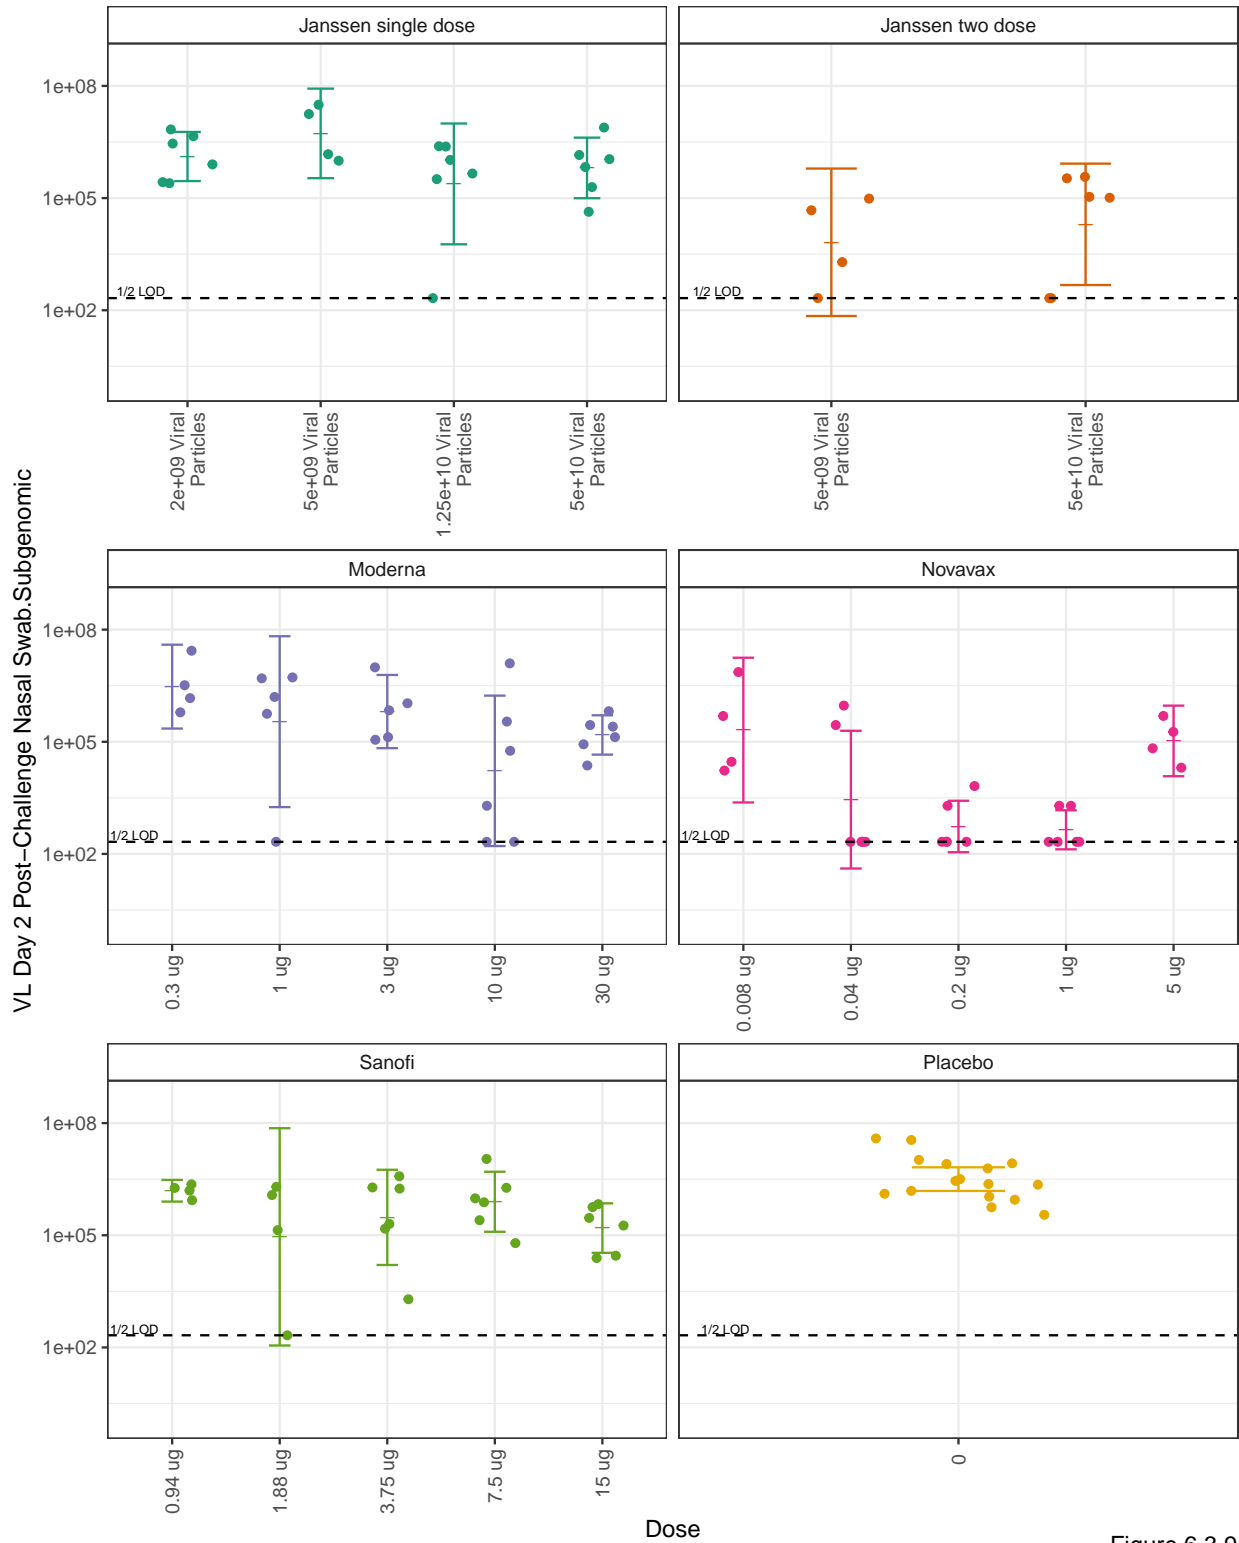

Figure 6.3.9

VL Day 2 Post-Challenge Nasal Swab, N1

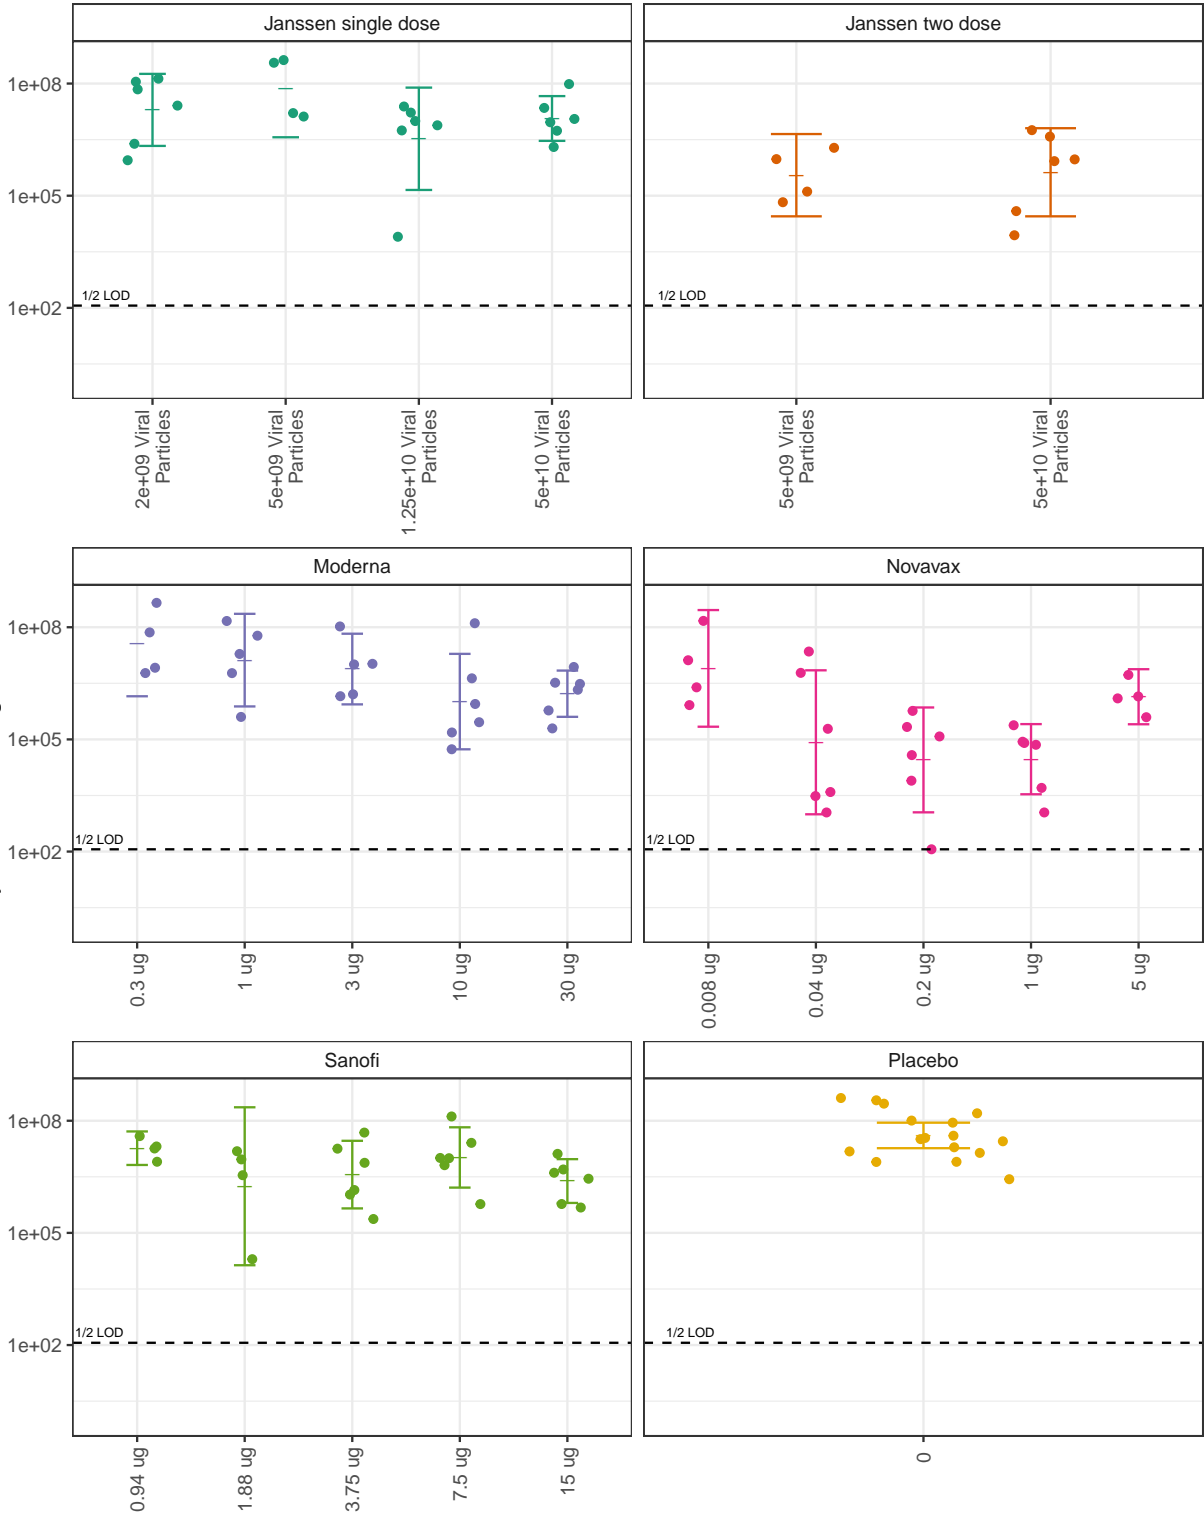

Dose

Figure 6.3.10

VL Day 2 Post-Challenge OP Swab.Subgenomic

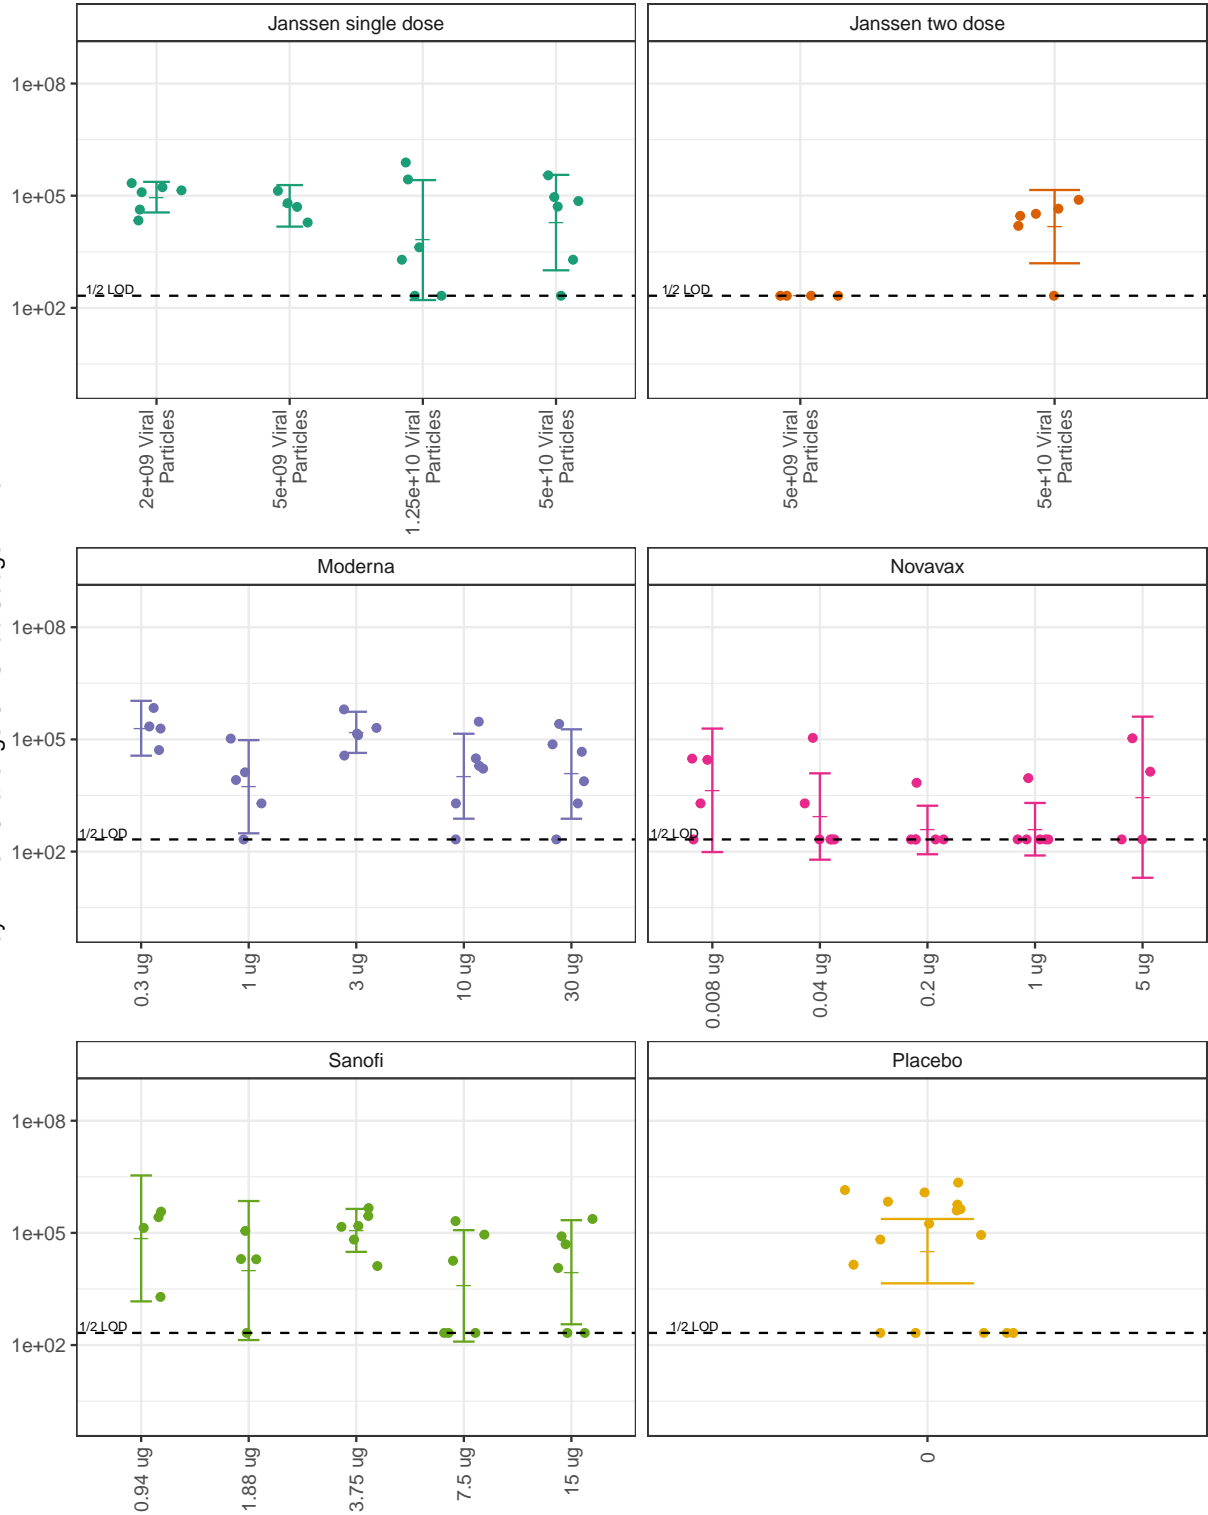

Dose

Figure 6.3.11

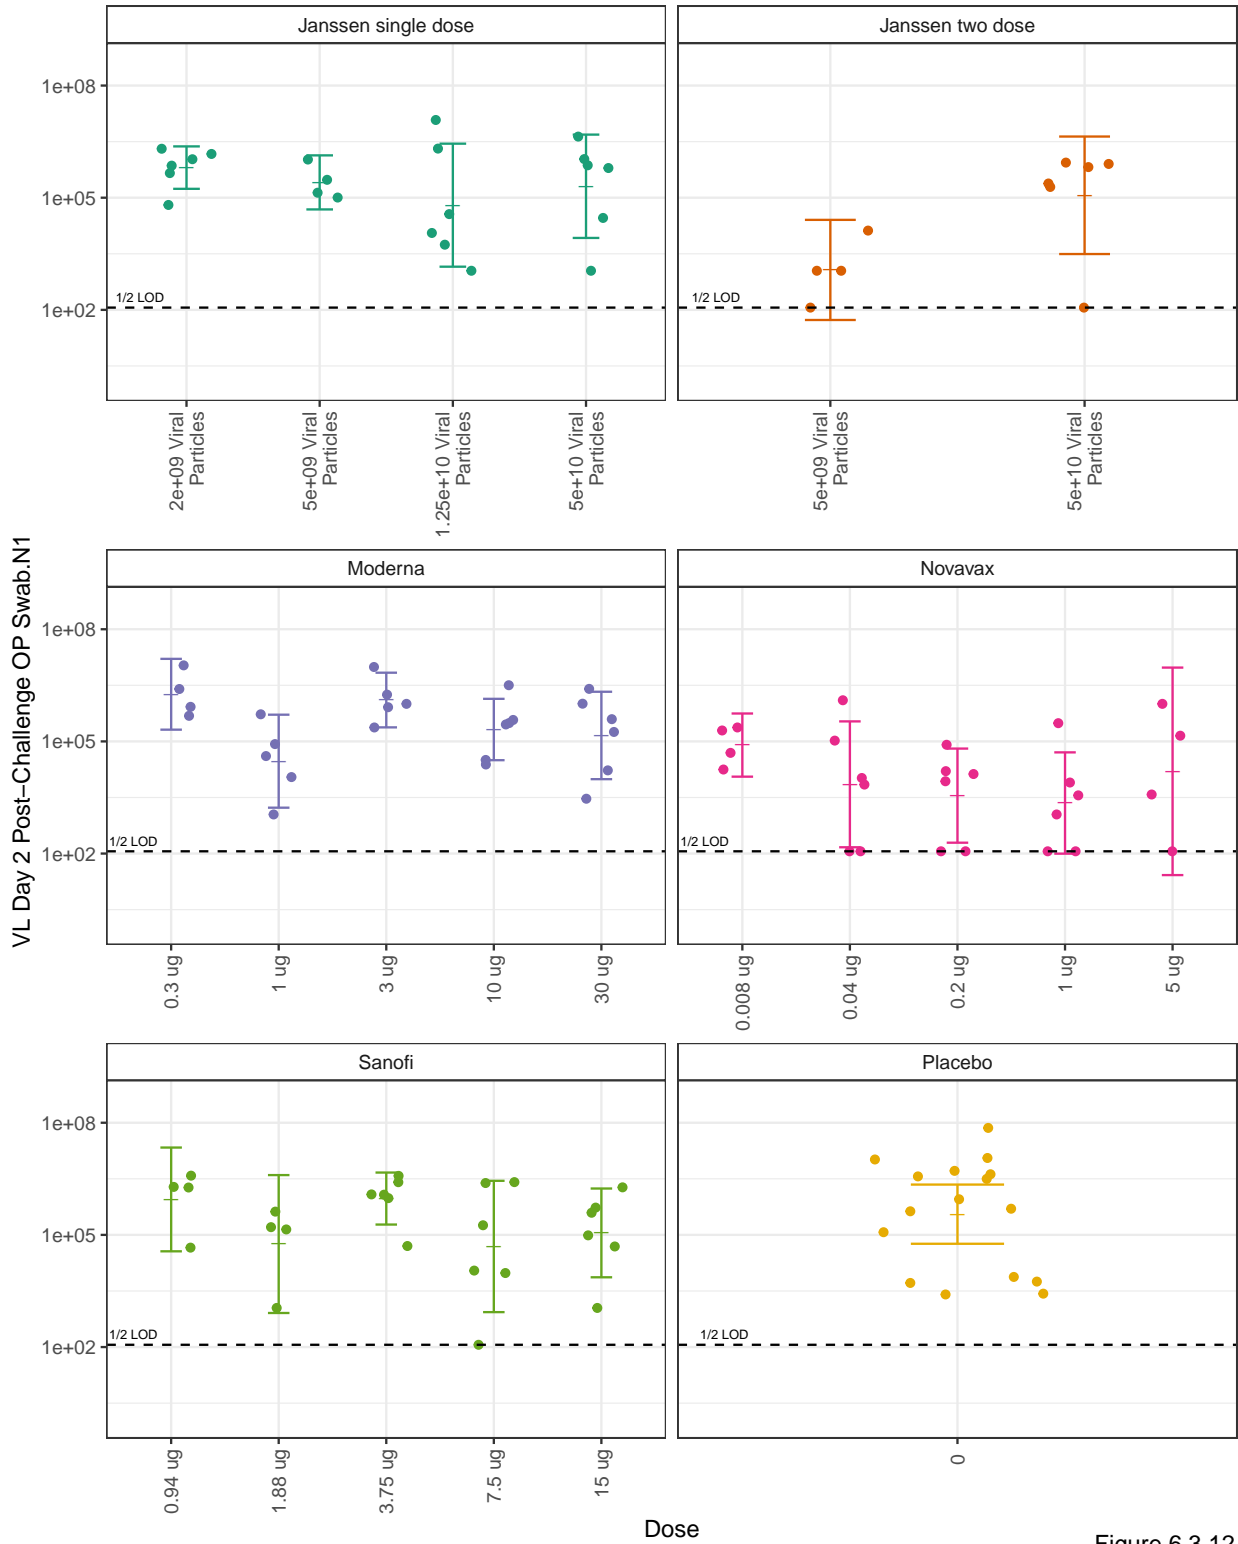

Figure 6.3.12

VL Day 2 Post-Challenge BAL: Subgenomic

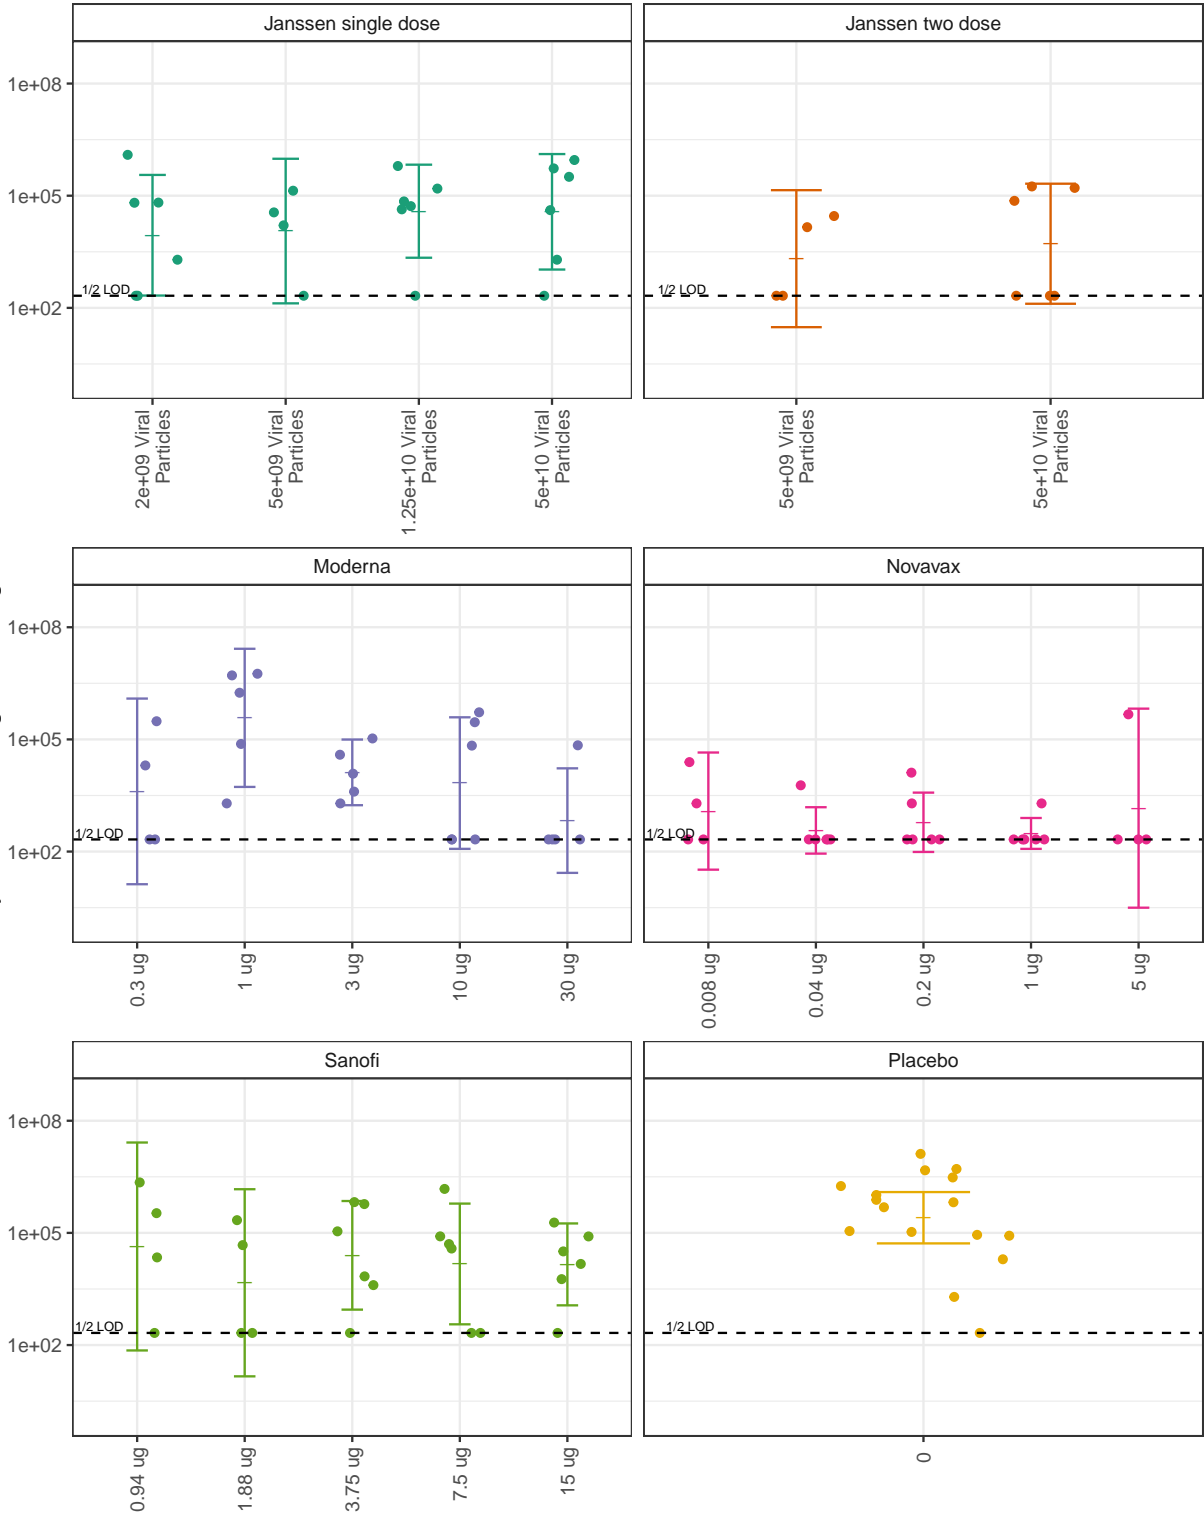

Figure 6.3.13

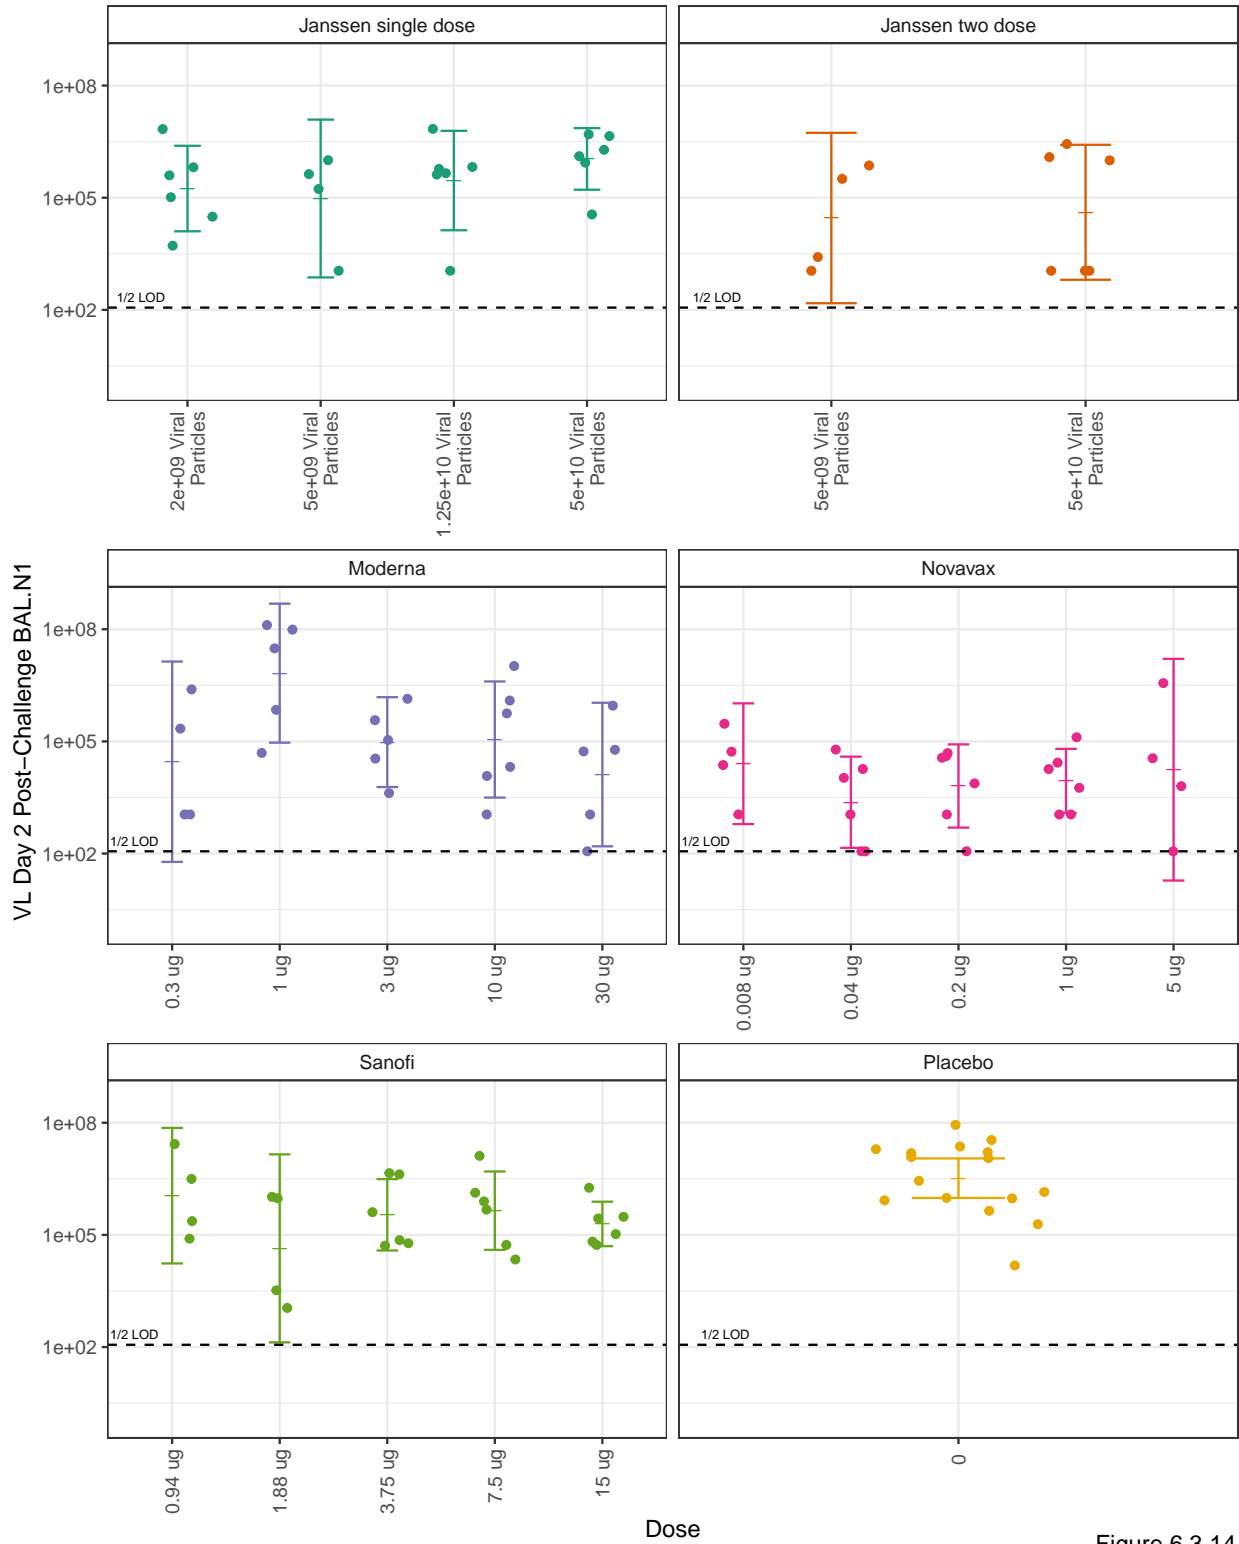

Figure 6.3.14

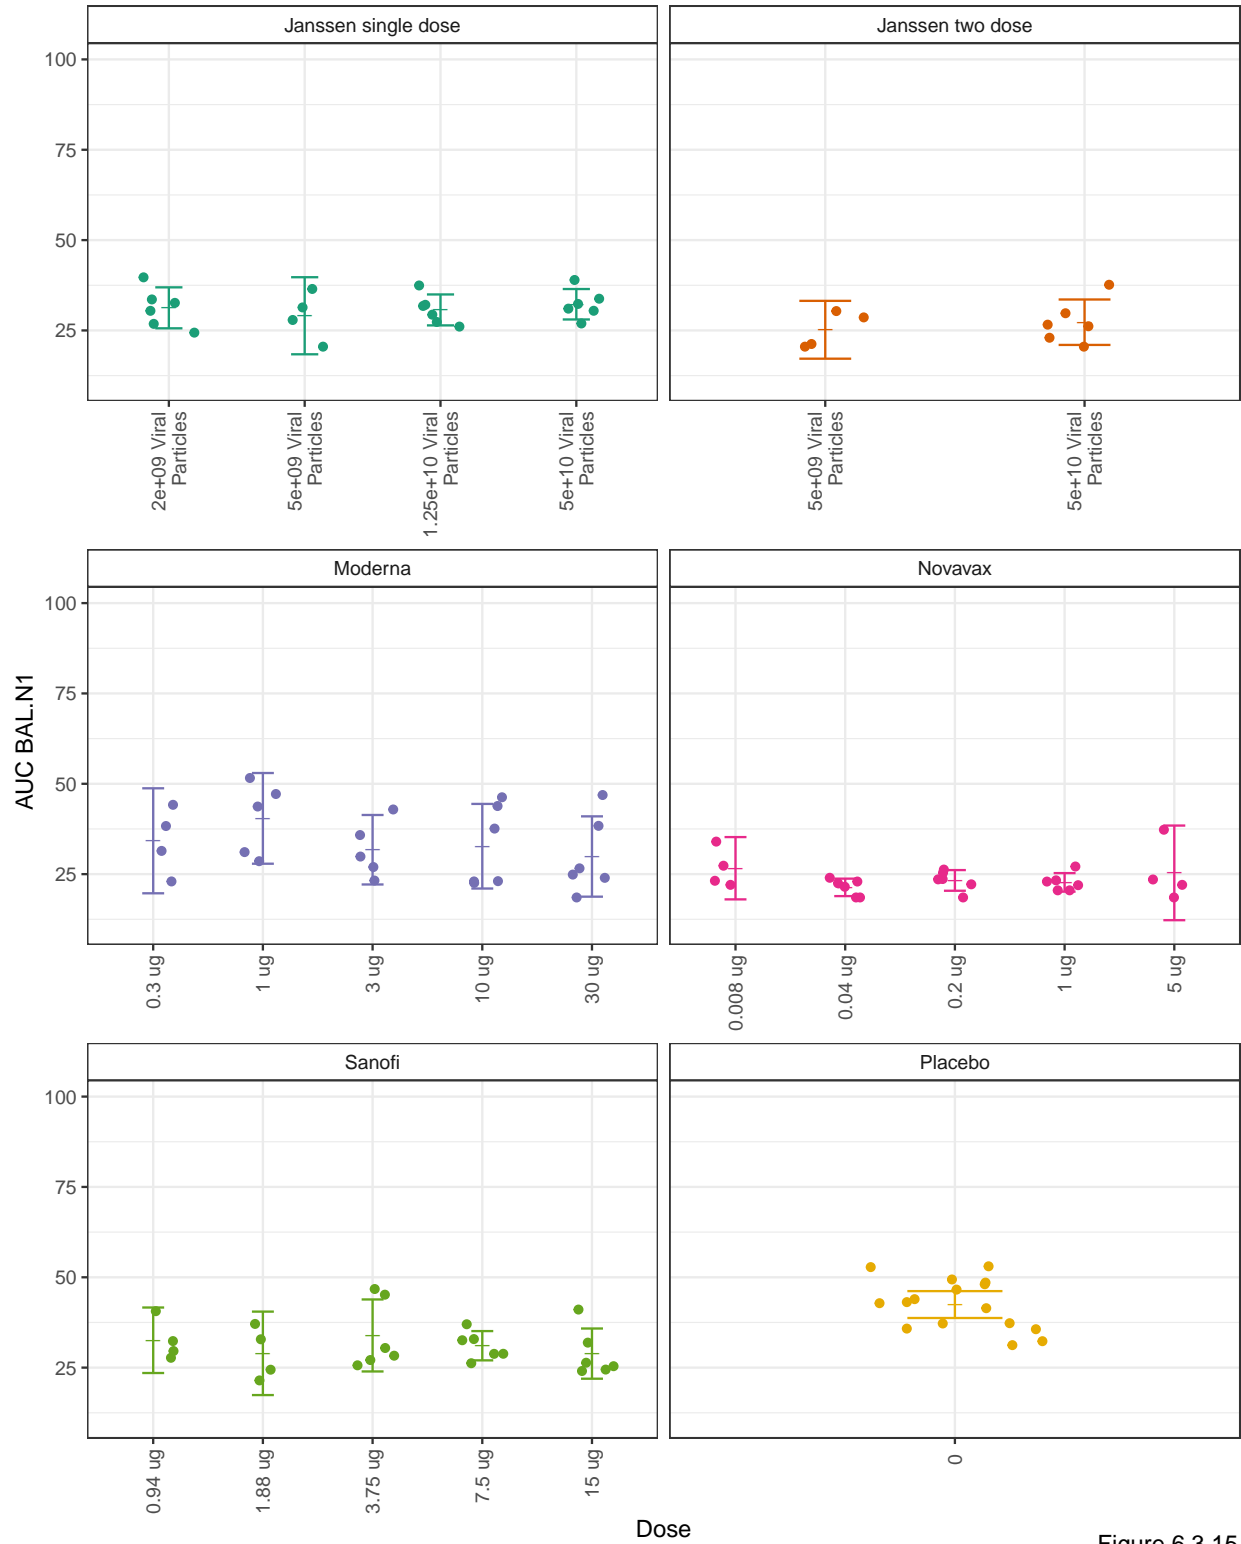

Figure 6.3.15

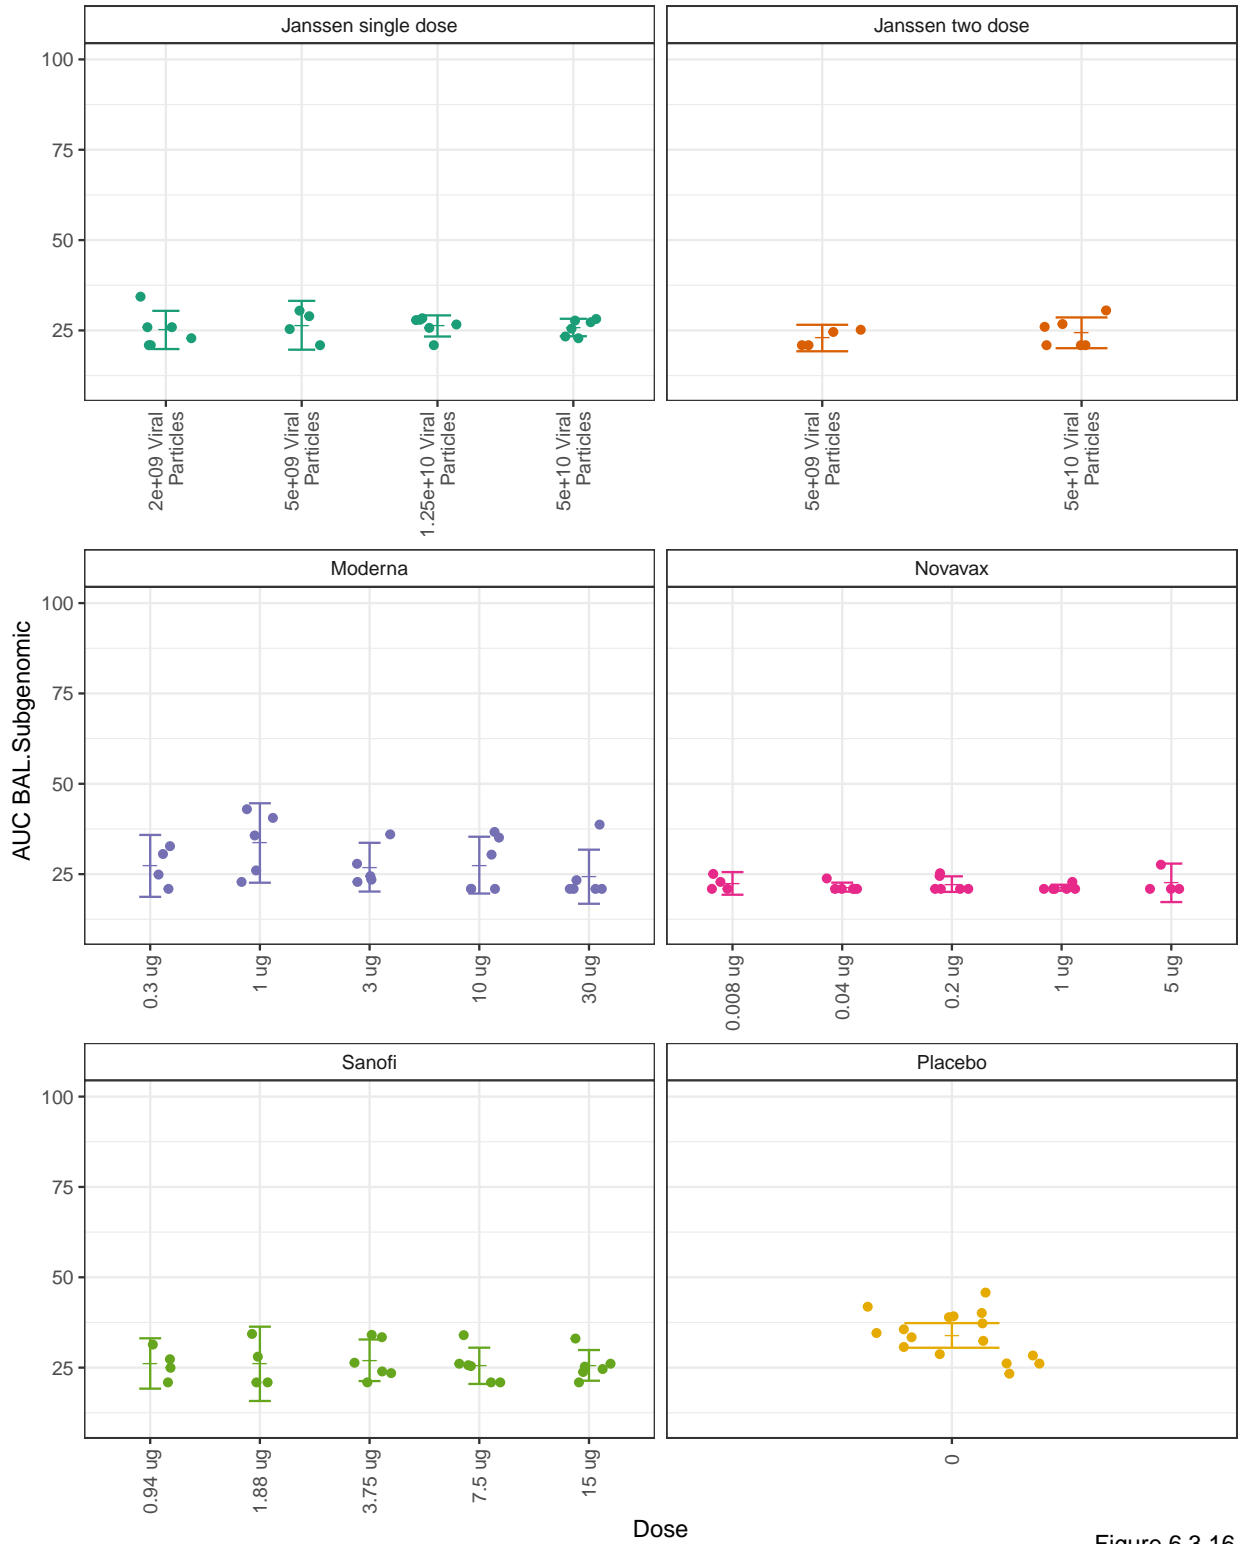

Figure 6.3.16

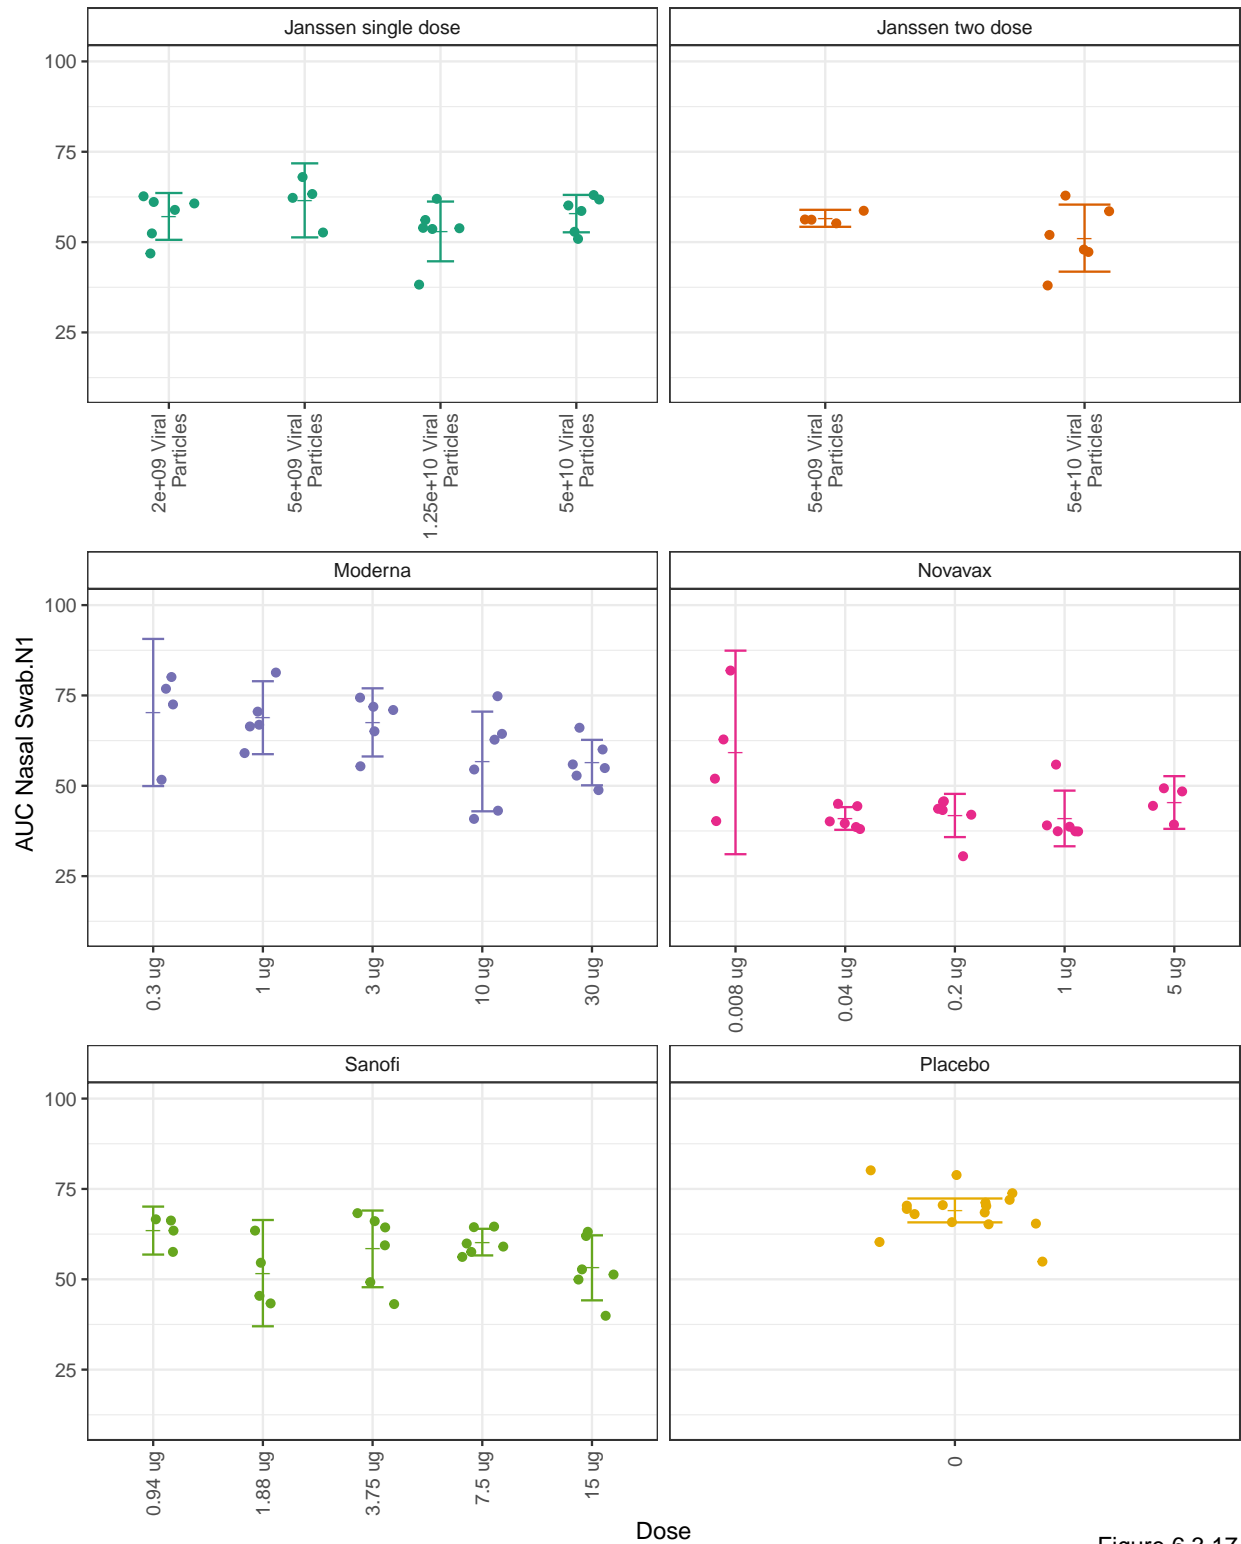

Figure 6.3.17

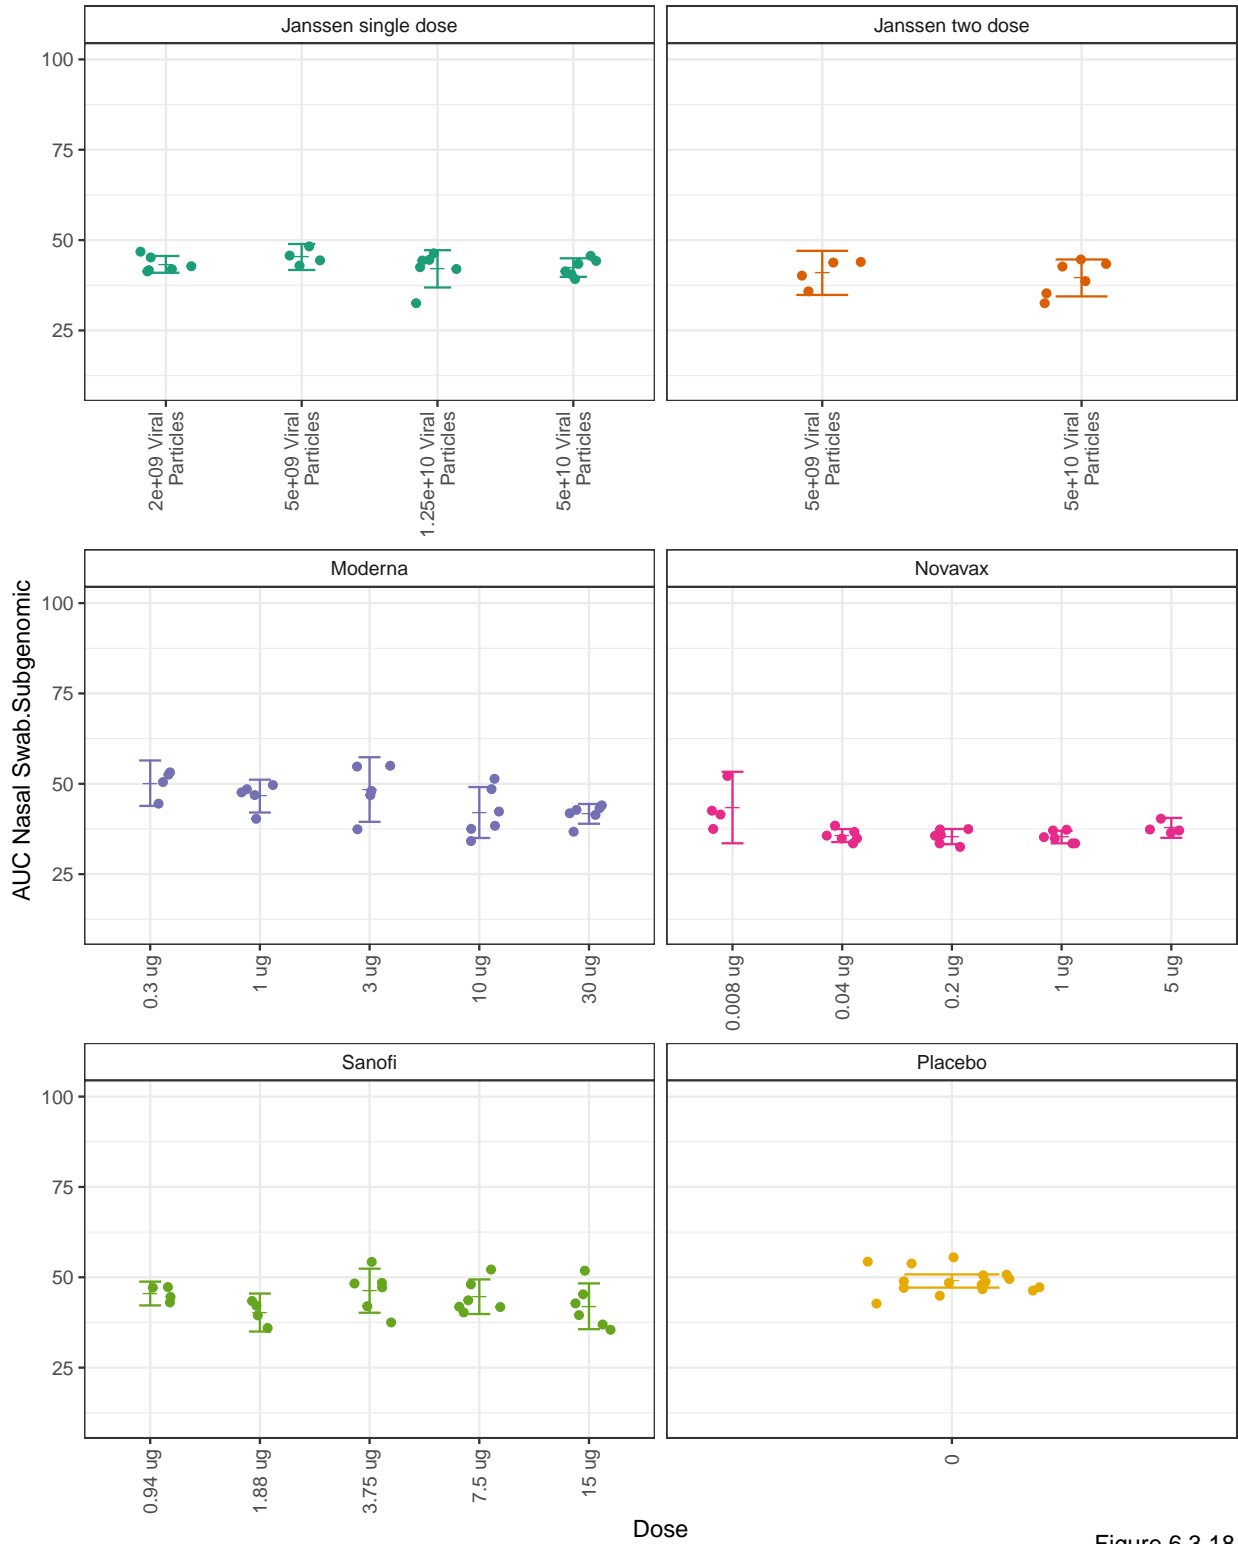

Figure 6.3.18

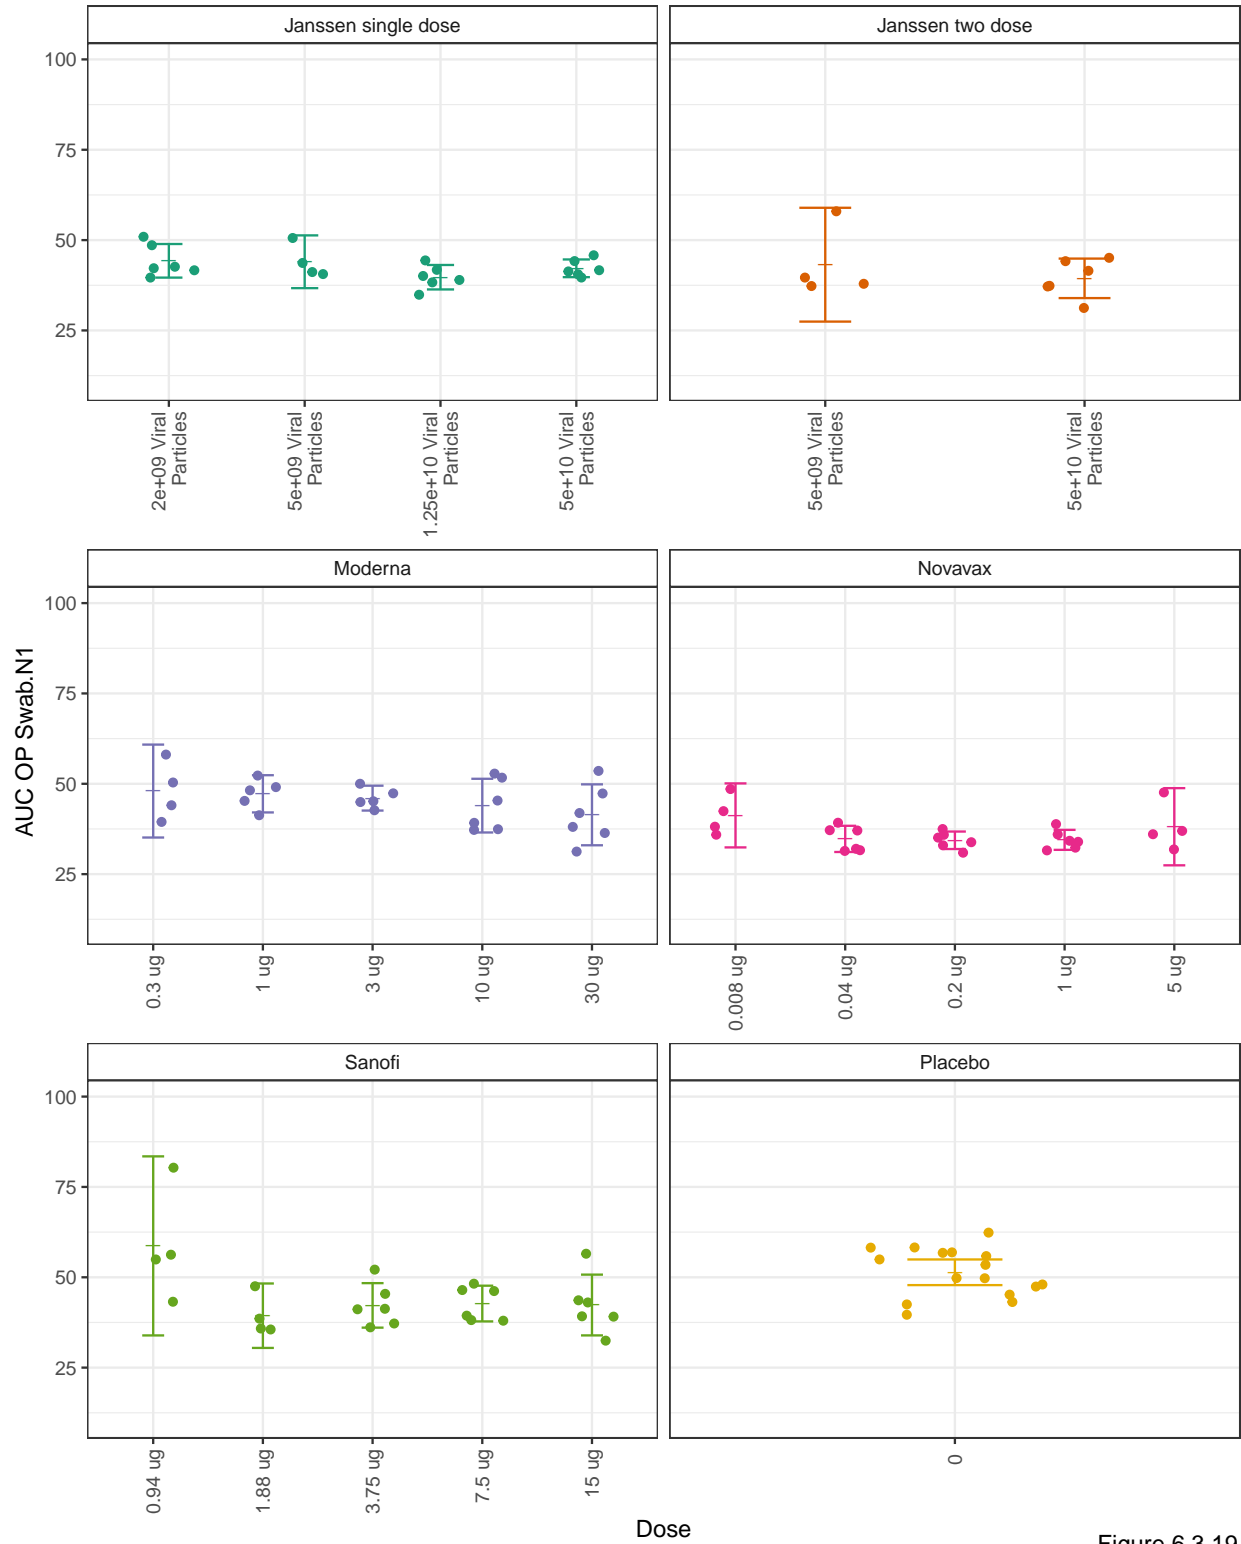

Figure 6.3.19

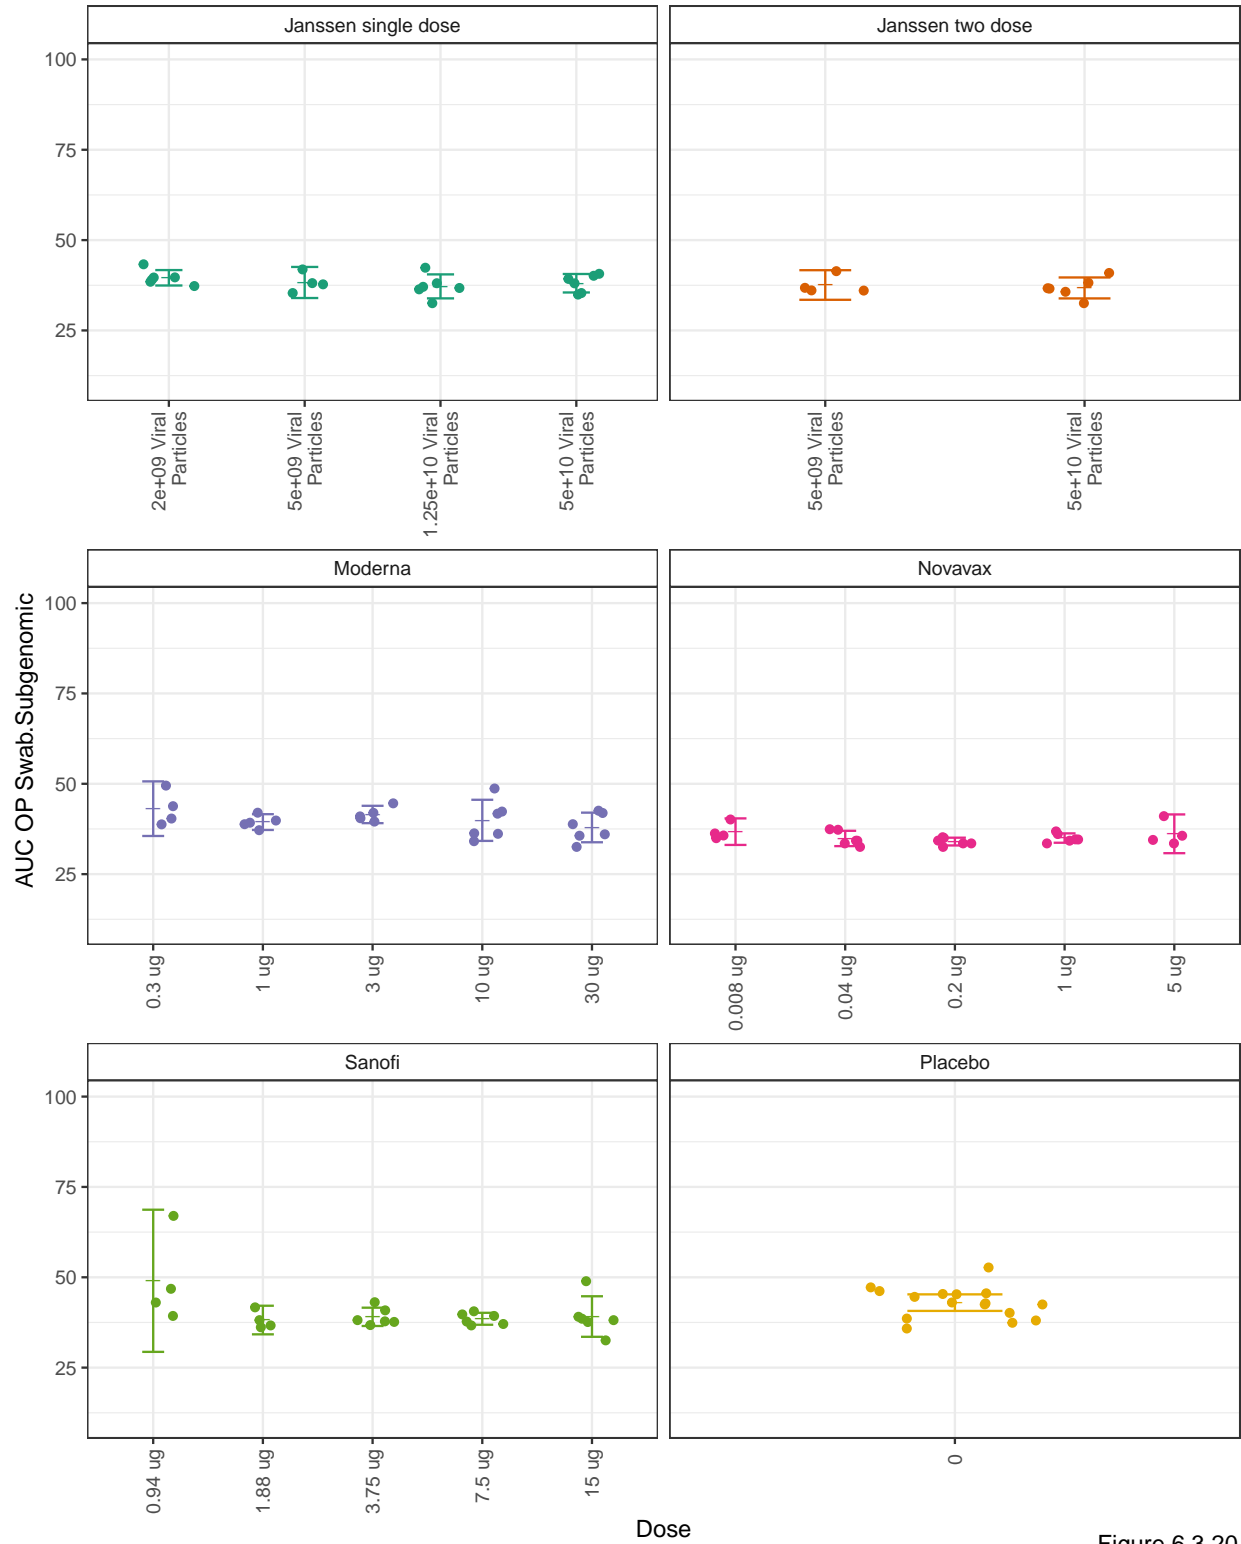

Figure 6.3.20

## Linear GEE

Original dose score:

Table 6.3.5: Linear GEE Results, Original Dose Score AUC BAL.N1

|                    | Estimate | Lower | Upper | p      |
|--------------------|----------|-------|-------|--------|
| Intercept          | 38.13    | 35.10 | 41.16 | <0.001 |
| Janssen dose score | -4.41    | -6.89 | -1.93 | 0.005  |
| Moderna dose score | -2.29    | -5.52 | 0.95  | 0.133  |
| Novavax dose score | -5.33    | -7.61 | -3.05 | 0.002  |
| Sanofi dose score  | -4.07    | -6.17 | -1.97 | 0.003  |

Table 6.3.6: Linear GEE Results, Original Dose Score AUC BAL.Subgenomic

|                    | Estimate | Lower | Upper | p      |
|--------------------|----------|-------|-------|--------|
| Intercept          | 31.03    | 28.55 | 33.52 | <0.001 |
| Janssen dose score | -3.00    | -4.38 | -1.62 | 0.002  |
| Moderna dose score | -1.66    | -3.64 | 0.33  | 0.086  |
| Novavax dose score | -3.33    | -4.41 | -2.25 | 0.001  |
| Sanofi dose score  | -2.84    | -4.41 | -1.27 | 0.004  |

Table 6.3.7: Linear GEE Results, Original Dose Score AUC Nasal Swab.N1

|                    | Estimate | Lower  | Upper | p      |
|--------------------|----------|--------|-------|--------|
| Intercept          | 67.03    | 62.30  | 71.77 | <0.001 |
| Janssen dose score | -6.01    | -9.28  | -2.74 | 0.004  |
| Moderna dose score | -2.47    | -4.64  | -0.30 | 0.032  |
| Novavax dose score | -8.62    | -12.73 | -4.50 | 0.003  |
| Sanofi dose score  | -5.68    | -8.79  | -2.56 | 0.004  |

Table 6.3.8: Linear GEE Results, Original Dose Score AUC Nasal Swab.Subgenomic

|                    | Estimate | Lower | Upper | p      |
|--------------------|----------|-------|-------|--------|
| Intercept          | 47.91    | 45.06 | 50.76 | <0.001 |
| Janssen dose score | -3.13    | -4.75 | -1.51 | 0.003  |
| Moderna dose score | -1.54    | -2.92 | -0.17 | 0.034  |
| Novavax dose score | -4.16    | -6.37 | -1.95 | 0.005  |
| Sanofi dose score  | -2.36    | -4.51 | -0.20 | 0.037  |

Table 6.3.9: Linear GEE Results, Original Dose Score AUC OP Swab.N1

|                    | Estimate | Lower | Upper | p      |
|--------------------|----------|-------|-------|--------|
| Intercept          | 49.74    | 46.12 | 53.37 | <0.001 |
| Janssen dose score | -4.24    | -6.40 | -2.09 | 0.003  |
| Moderna dose score | -2.35    | -4.74 | 0.03  | 0.052  |
| Novavax dose score | -5.08    | -7.43 | -2.72 | 0.003  |
| Sanofi dose score  | -3.49    | -6.15 | -0.83 | 0.018  |

Table 6.3.10: Linear GEE Results, Original Dose Score AUC OP Swab.Subgenomic

|                    | Estimate | Lower | Upper | p      |
|--------------------|----------|-------|-------|--------|
| Intercept          | 42.27    | 39.61 | 44.94 | <0.001 |
| Janssen dose score | -2.36    | -3.79 | -0.93 | 0.007  |
| Moderna dose score | -1.10    | -2.56 | 0.36  | 0.113  |
| Novavax dose score | -2.60    | -3.93 | -1.27 | 0.004  |
| Sanofi dose score  | -1.42    | -2.73 | -0.12 | 0.037  |

Table 6.3.11: Linear GEE Results, Original Dose Score log VL Day2 PostChallenge BAL.N1

|                    | Estimate | Lower | Upper | p      |
|--------------------|----------|-------|-------|--------|
| Intercept          | 5.91     | 5.47  | 6.35  | <0.001 |
| Janssen dose score | -0.36    | -0.88 | 0.17  | 0.15   |
| Moderna dose score | -0.41    | -0.97 | 0.16  | 0.129  |
| Novavax dose score | -0.73    | -1.12 | -0.33 | 0.005  |
| Sanofi dose score  | -0.27    | -0.62 | 0.08  | 0.106  |

Table 6.3.12: Linear GEE Results, Original Dose Score log VL Day2 PostChallenge BAL.Subgenomic

|                    | Estimate | Lower | Upper | p      |
|--------------------|----------|-------|-------|--------|
| Intercept          | 4.84     | 4.35  | 5.33  | <0.001 |
| Janssen dose score | -0.37    | -0.80 | 0.05  | 0.076  |
| Moderna dose score | -0.44    | -0.94 | 0.06  | 0.074  |
| Novavax dose score | -0.76    | -1.11 | -0.40 | 0.003  |
| Sanofi dose score  | -0.36    | -0.72 | -0.01 | 0.048  |

Table 6.3.13: Linear GEE Results, Original Dose Score log VL Day2 PostChallenge OPswab.N1

|                    | Estimate | Lower | Upper | p      |
|--------------------|----------|-------|-------|--------|
| Intercept          | 5.45     | 4.43  | 6.48  | <0.001 |
| Janssen dose score | -0.24    | -0.64 | 0.17  | 0.196  |
| Moderna dose score | -0.04    | -0.40 | 0.32  | 0.793  |
| Novavax dose score | -0.61    | -1.00 | -0.22 | 0.011  |
| Sanofi dose score  | -0.14    | -0.60 | 0.32  | 0.489  |

Table 6.3.14: Linear GEE Results, Original Dose Score log VL Day2 PostChallenge OPswab.Subgenomic

|                    | Estimate | Lower | Upper | p      |
|--------------------|----------|-------|-------|--------|
| Intercept          | 4.47     | 3.48  | 5.46  | <0.001 |
| Janssen dose score | -0.20    | -0.58 | 0.19  | 0.254  |
| Moderna dose score | -0.07    | -0.42 | 0.28  | 0.623  |
| Novavax dose score | -0.56    | -1.01 | -0.12 | 0.023  |
| Sanofi dose score  | -0.16    | -0.64 | 0.32  | 0.446  |

Table 6.3.15: Linear GEE Results, Original Dose Score log VL Day2 PostChallenge NasalSwab.N1

|                    | Estimate | Lower | Upper | p      |
|--------------------|----------|-------|-------|--------|
| Intercept          | 7.44     | 6.75  | 8.13  | <0.001 |
| Janssen dose score | -0.46    | -0.94 | 0.02  | 0.059  |
| Moderna dose score | -0.40    | -0.78 | -0.02 | 0.043  |
| Novavax dose score | -0.85    | -1.51 | -0.19 | 0.021  |
| Sanofi dose score  | -0.44    | -0.83 | -0.06 | 0.031  |

Table 6.3.16: Linear GEE Results, Original Dose Score log VL Day2 PostChallenge NasalSwab.Subgenomic

|                    | Estimate | Lower | Upper | p      |
|--------------------|----------|-------|-------|--------|
| Intercept          | 6.22     | 5.46  | 6.99  | <0.001 |
| Janssen dose score | -0.49    | -0.99 | 0.01  | 0.052  |
| Moderna dose score | -0.45    | -0.94 | 0.05  | 0.068  |
| Novavax dose score | -0.98    | -1.80 | -0.15 | 0.028  |
| Sanofi dose score  | -0.41    | -0.80 | -0.01 | 0.046  |

**Single dose halved dose score:**

Also shown are geometric means and the corresponding 95% confidence intervals, along with the fitted line from the linear GEE model. Dashed horizontal lines are the placebo estimate from the model.

Table 6.3.17: Linear GEE Results, Single Dose Halved Dose Score AUC BAL.N1

|                    | Estimate | Lower | Upper | p      |
|--------------------|----------|-------|-------|--------|
| Intercept          | 38.23    | 35.40 | 41.06 | <0.001 |
| Janssen dose score | -4.28    | -6.33 | -2.23 | 0.002  |
| Moderna dose score | -2.33    | -5.43 | 0.77  | 0.114  |
| Novavax dose score | -5.37    | -7.60 | -3.13 | 0.002  |
| Sanofi dose score  | -4.13    | -6.12 | -2.14 | 0.002  |

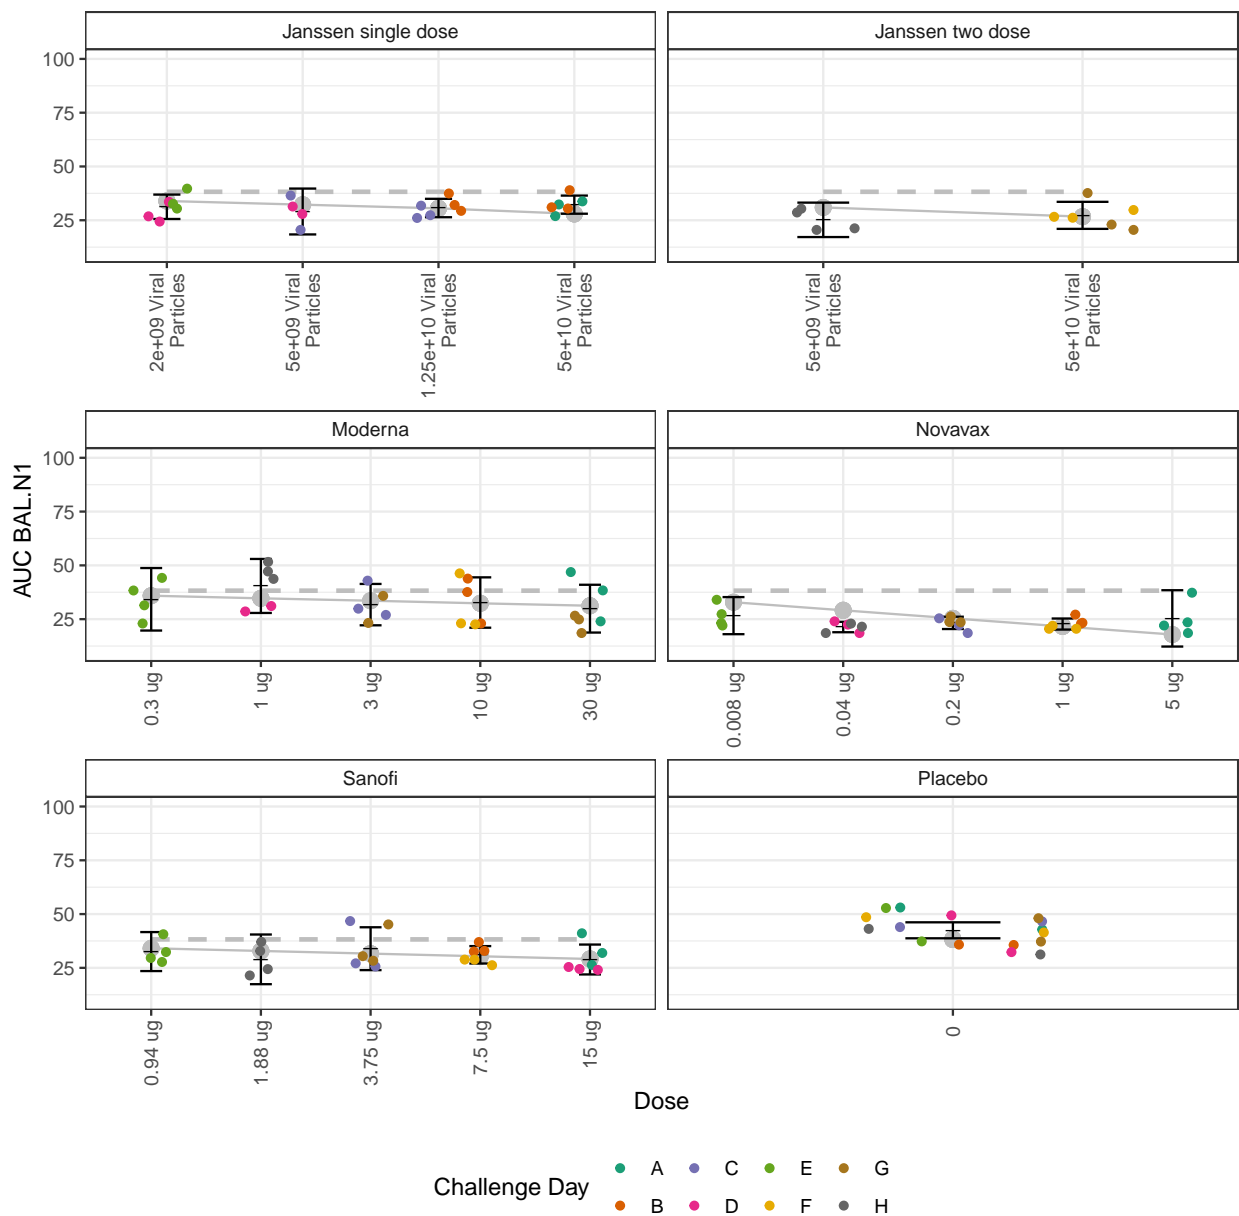

Figure 6.3.21

Table 6.3.18: Linear GEE Results, Single Dose Halved Dose Score AUC BAL.Subgenomic

|                    | Estimate | Lower | Upper | p      |
|--------------------|----------|-------|-------|--------|
| Intercept          | 31.06    | 28.61 | 33.52 | <0.001 |
| Janssen dose score | -2.87    | -4.09 | -1.66 | 0.001  |
| Moderna dose score | -1.67    | -3.57 | 0.24  | 0.075  |
| Novavax dose score | -3.34    | -4.41 | -2.27 | 0.001  |
| Sanofi dose score  | -2.86    | -4.39 | -1.32 | 0.004  |

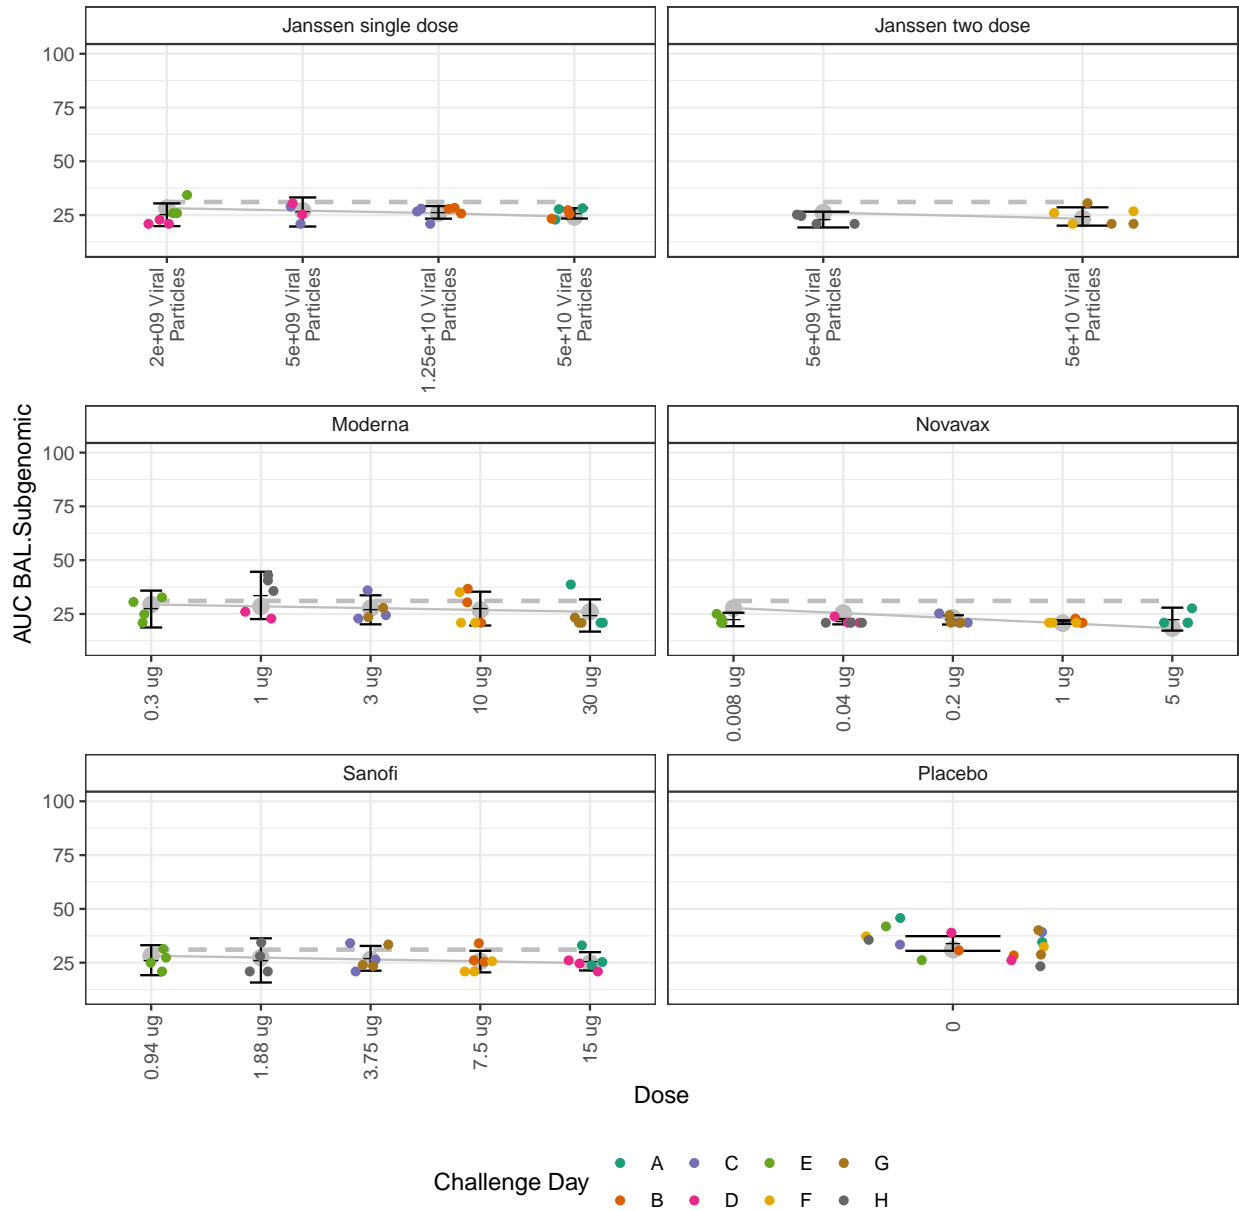

Figure 6.3.22

Table 6.3.19: Linear GEE Results, Single Dose Halved Dose Score AUC Nasal Swab.N1

|                    | Estimate | Lower  | Upper | p      |
|--------------------|----------|--------|-------|--------|
| Intercept          | 67.05    | 62.50  | 71.60 | <0.001 |
| Janssen dose score | -5.72    | -8.56  | -2.88 | 0.003  |
| Moderna dose score | -2.47    | -4.58  | -0.36 | 0.029  |
| Novavax dose score | -8.62    | -12.68 | -4.57 | 0.003  |
| Sanofi dose score  | -5.69    | -8.73  | -2.64 | 0.004  |

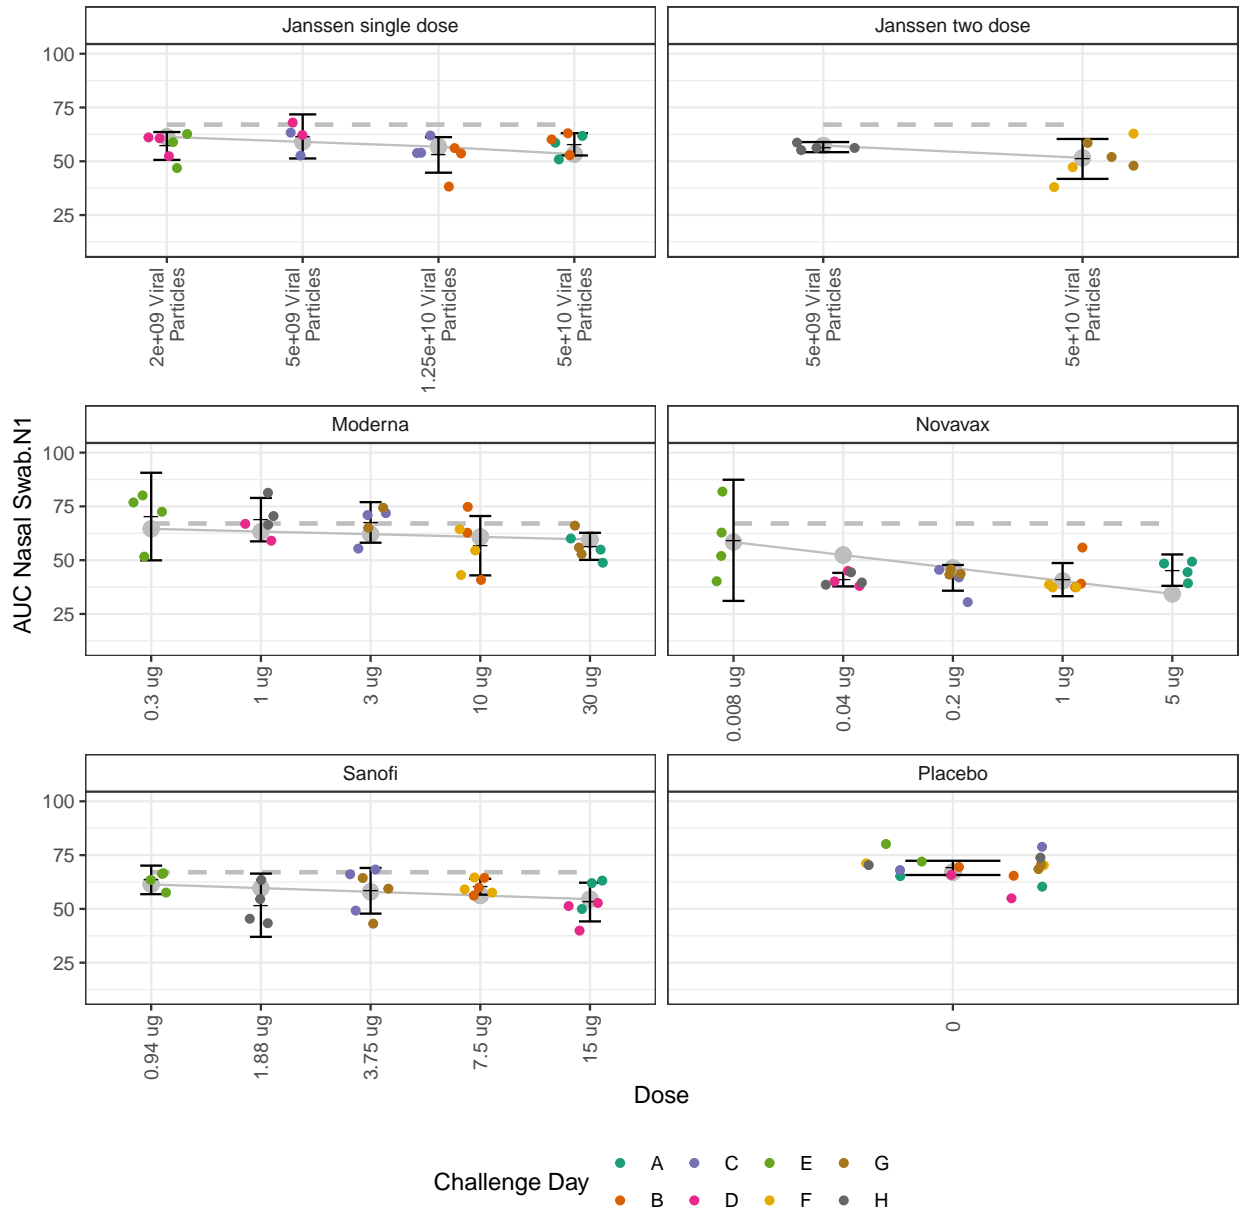

Figure 6.3.23

Table 6.3.20: Linear GEE Results, Single Dose Halved Dose Score AUC Nasal Swab.Subgenomic

|                    | Estimate | Lower | Upper | p      |
|--------------------|----------|-------|-------|--------|
| Intercept          | 47.96    | 45.21 | 50.71 | <0.001 |
| Janssen dose score | -3.02    | -4.46 | -1.57 | 0.002  |
| Moderna dose score | -1.56    | -2.89 | -0.23 | 0.029  |
| Novavax dose score | -4.18    | -6.36 | -1.99 | 0.005  |
| Sanofi dose score  | -2.38    | -4.50 | -0.26 | 0.033  |

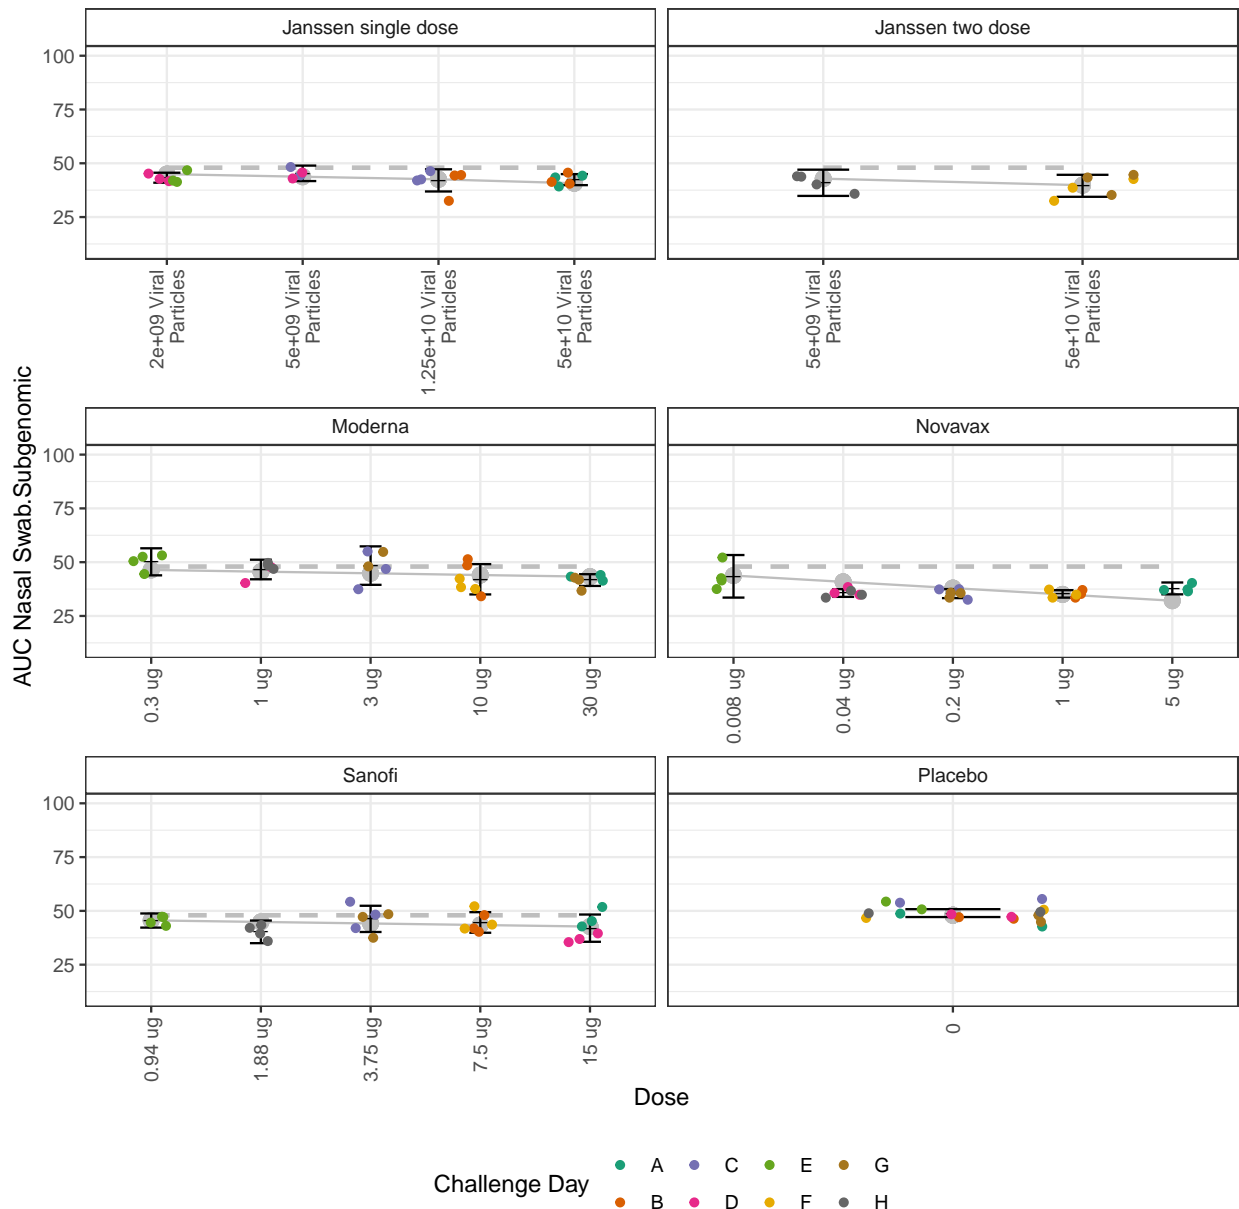

Figure 6.3.24

Table 6.3.21: Linear GEE Results, Single Dose Halved Dose Score AUC OP Swab.N1

|                    | Estimate | Lower | Upper | p      |
|--------------------|----------|-------|-------|--------|
| Intercept          | 49.71    | 46.25 | 53.17 | <0.001 |
| Janssen dose score | -3.99    | -5.90 | -2.08 | 0.002  |
| Moderna dose score | -2.34    | -4.66 | -0.02 | 0.049  |
| Novavax dose score | -5.06    | -7.36 | -2.77 | 0.002  |
| Sanofi dose score  | -3.47    | -6.06 | -0.88 | 0.017  |

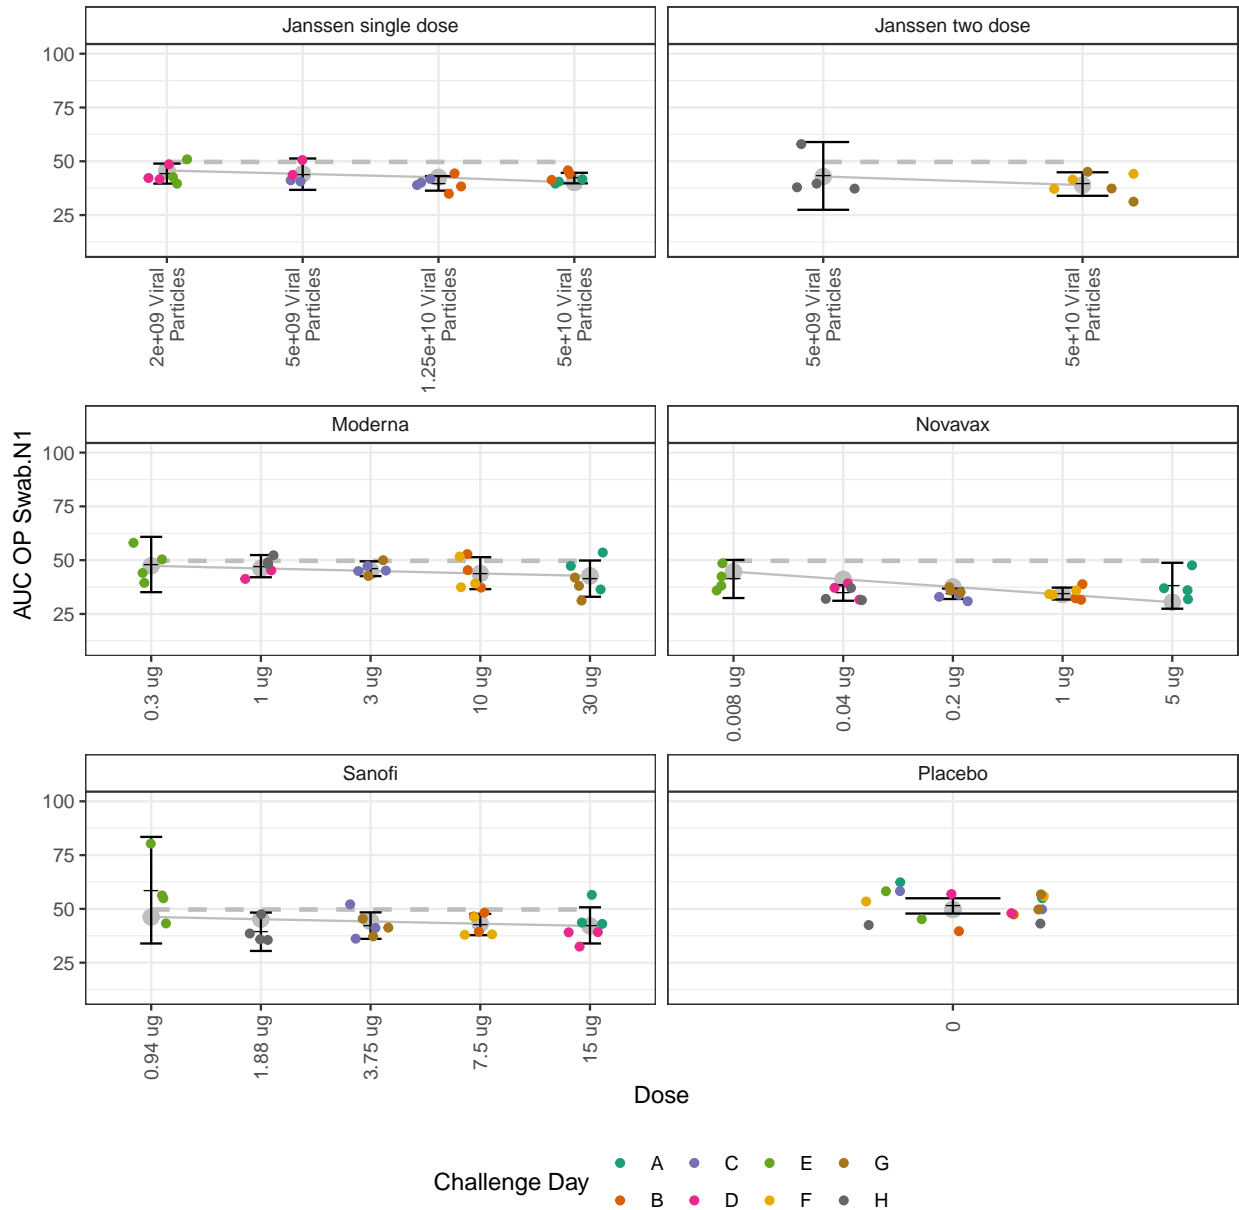

Figure 6.3.25

Table 6.3.22: Linear GEE Results, Single Dose Halved Dose Score AUC OP Swab.Subgenomic

|                    | Estimate | Lower | Upper | p      |
|--------------------|----------|-------|-------|--------|
| Intercept          | 42.27    | 39.72 | 44.82 | <0.001 |
| Janssen dose score | -2.24    | -3.50 | -0.97 | 0.005  |
| Moderna dose score | -1.10    | -2.51 | 0.31  | 0.104  |
| Novavax dose score | -2.60    | -3.89 | -1.31 | 0.004  |
| Sanofi dose score  | -1.42    | -2.66 | -0.19 | 0.031  |

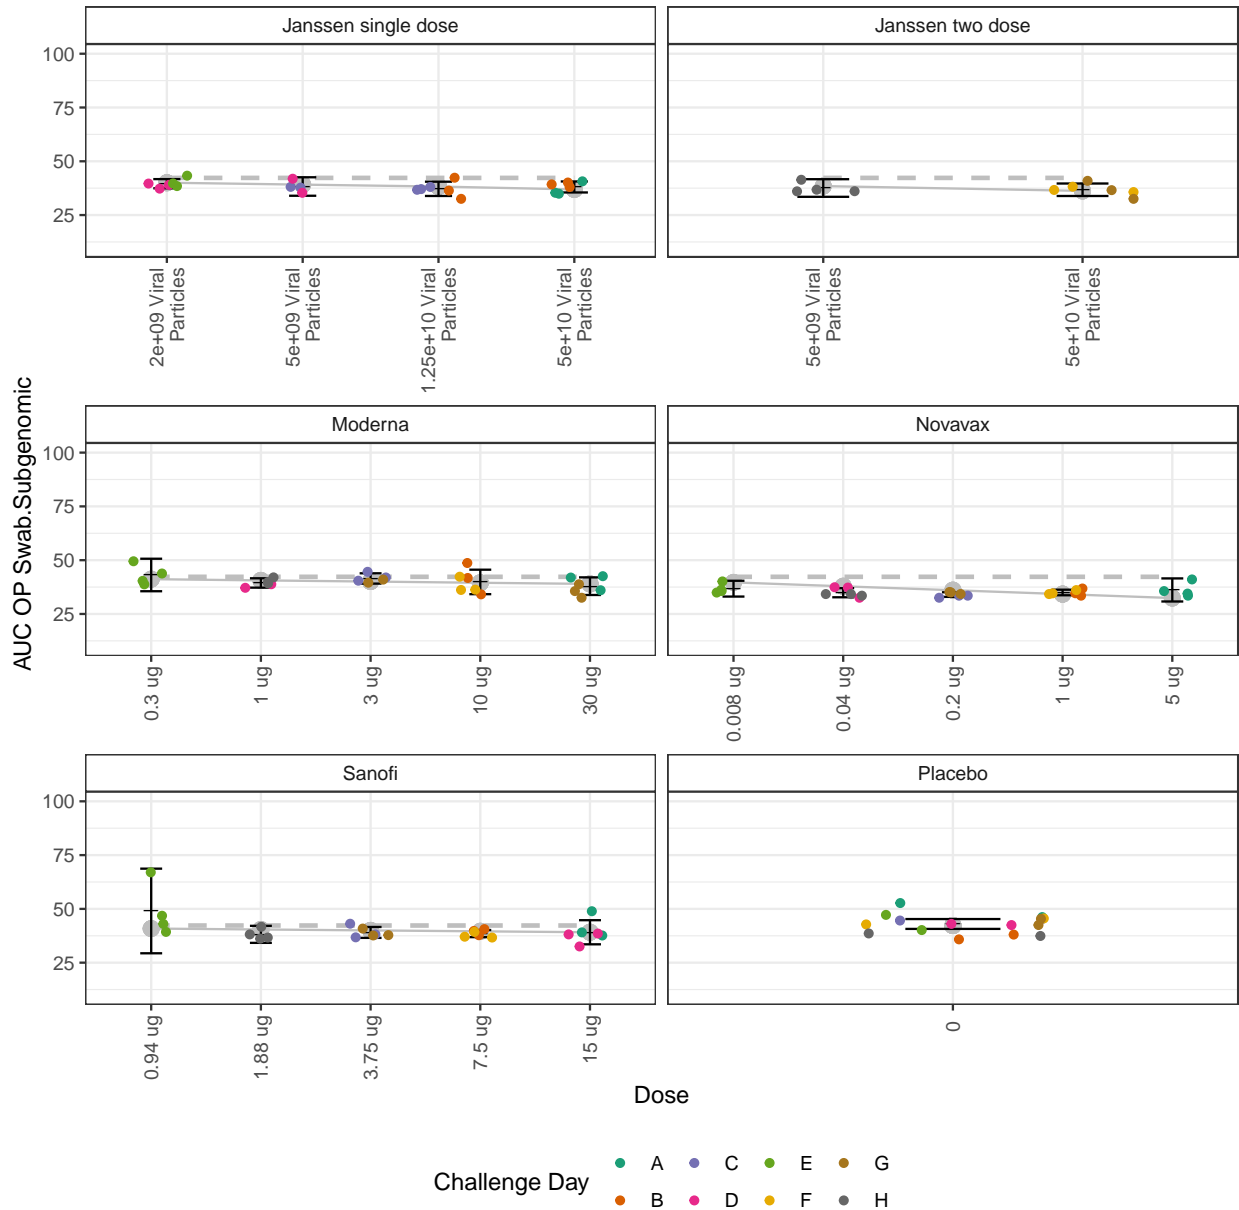

Figure 6.3.26

Table 6.3.23: Linear GEE Results, Single Dose Halved Dose Score log VL Day2 PostChallenge BAL.N1

|                    | Estimate | Lower | Upper | p      |
|--------------------|----------|-------|-------|--------|
| Intercept          | 5.95     | 5.52  | 6.37  | <0.001 |
| Janssen dose score | -0.37    | -0.84 | 0.10  | 0.104  |
| Moderna dose score | -0.42    | -0.98 | 0.14  | 0.114  |
| Novavax dose score | -0.74    | -1.13 | -0.35 | 0.004  |
| Sanofi dose score  | -0.29    | -0.63 | 0.05  | 0.085  |

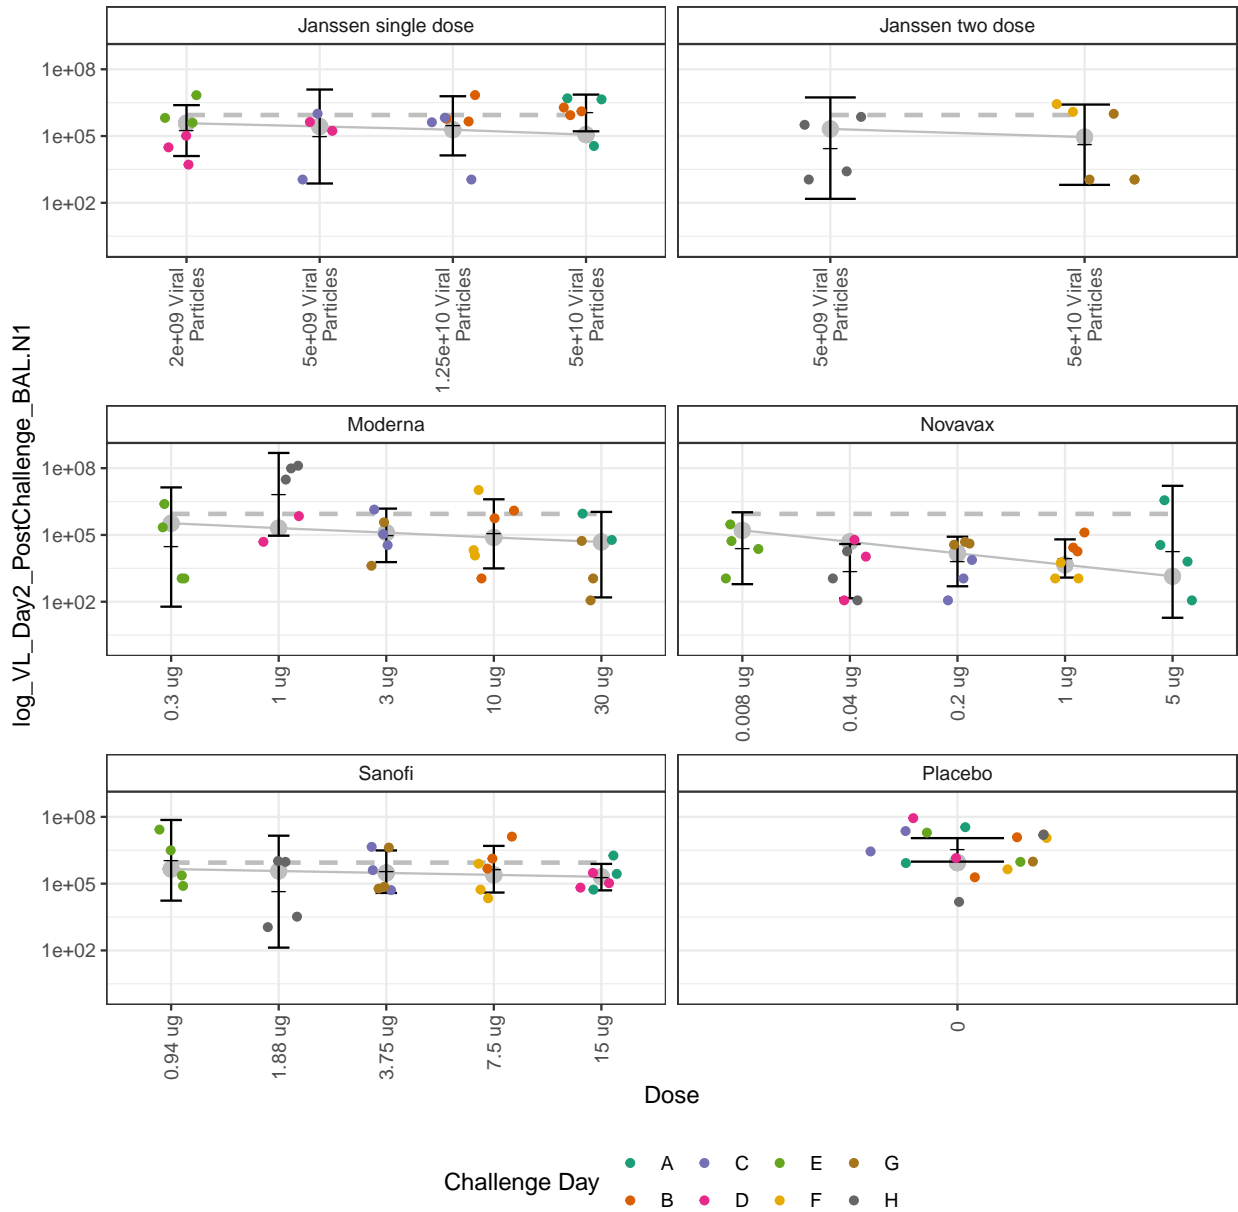

Figure 6.3.27

Table 6.3.24: Linear GEE Results, Single Dose Halved Dose Score log VL Day2 PostChallenge BAL.Subgenomic

|                    | Estimate | Lower | Upper | p      |
|--------------------|----------|-------|-------|--------|
| Intercept          | 4.87     | 4.40  | 5.34  | <0.001 |
| Janssen dose score | -0.38    | -0.76 | 0.00  | 0.052  |
| Moderna dose score | -0.45    | -0.93 | 0.03  | 0.062  |
| Novavax dose score | -0.76    | -1.11 | -0.41 | 0.002  |
| Sanofi dose score  | -0.38    | -0.72 | -0.03 | 0.037  |

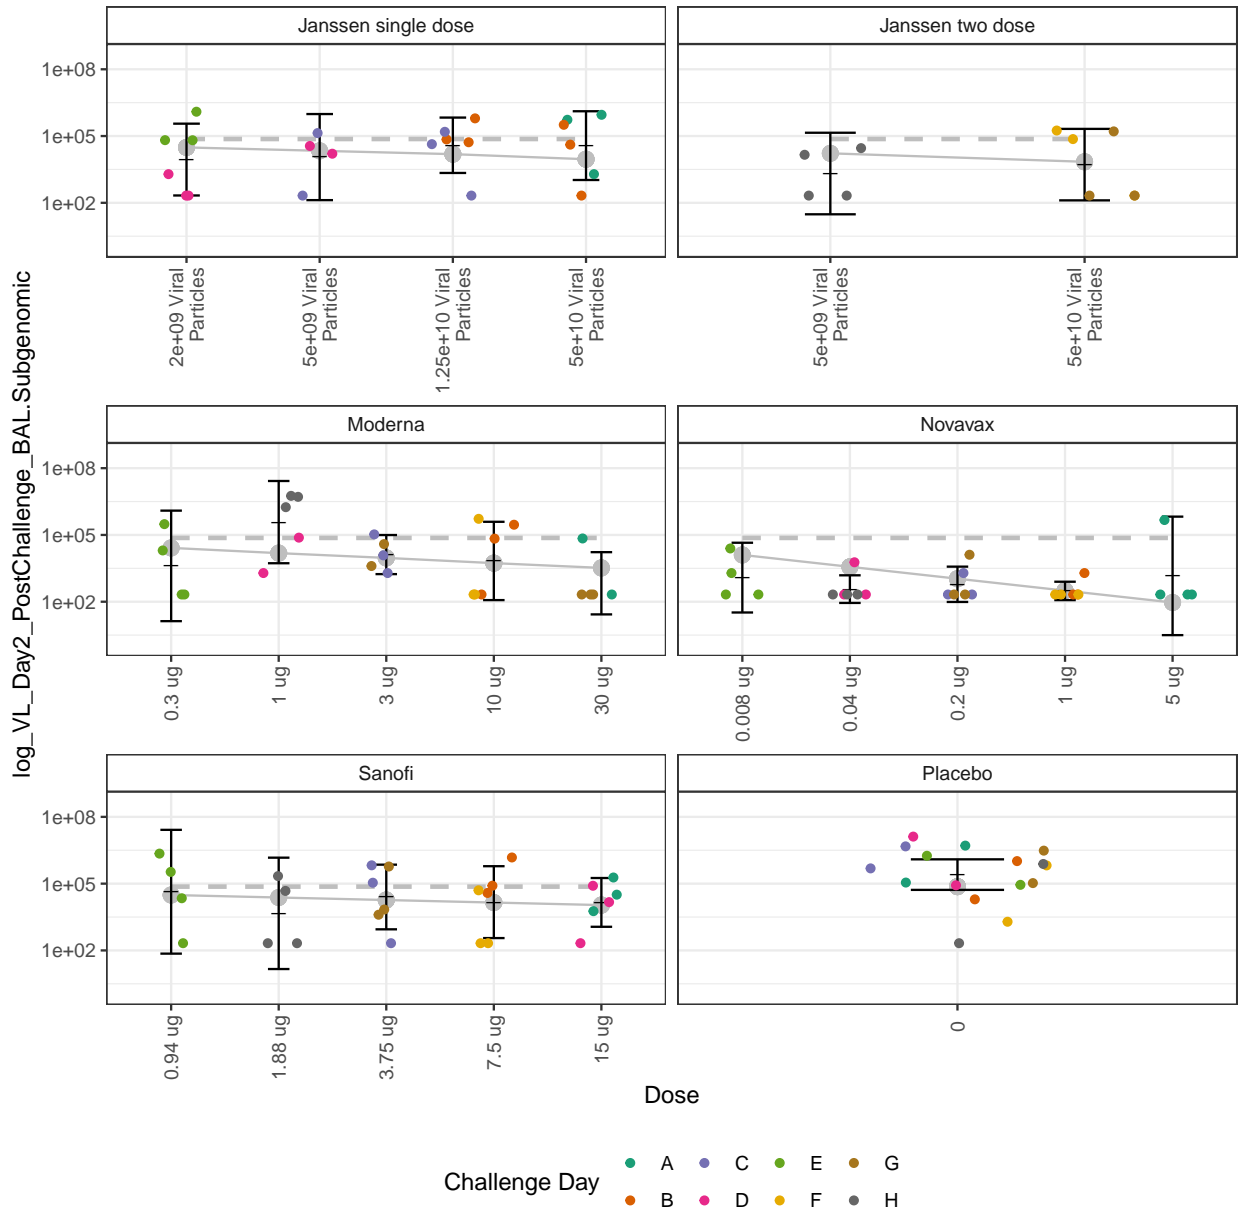

Figure 6.3.28

Table 6.3.25: Linear GEE Results, Single Dose Halved Dose Score log VL Day2 PostChallenge OPswab.N1

|                    | Estimate | Lower | Upper | p      |
|--------------------|----------|-------|-------|--------|
| Intercept          | 5.49     | 4.55  | 6.43  | <0.001 |
| Janssen dose score | -0.26    | -0.61 | 0.09  | 0.121  |
| Moderna dose score | -0.05    | -0.39 | 0.28  | 0.69   |
| Novavax dose score | -0.62    | -1.00 | -0.25 | 0.009  |
| Sanofi dose score  | -0.16    | -0.57 | 0.26  | 0.384  |

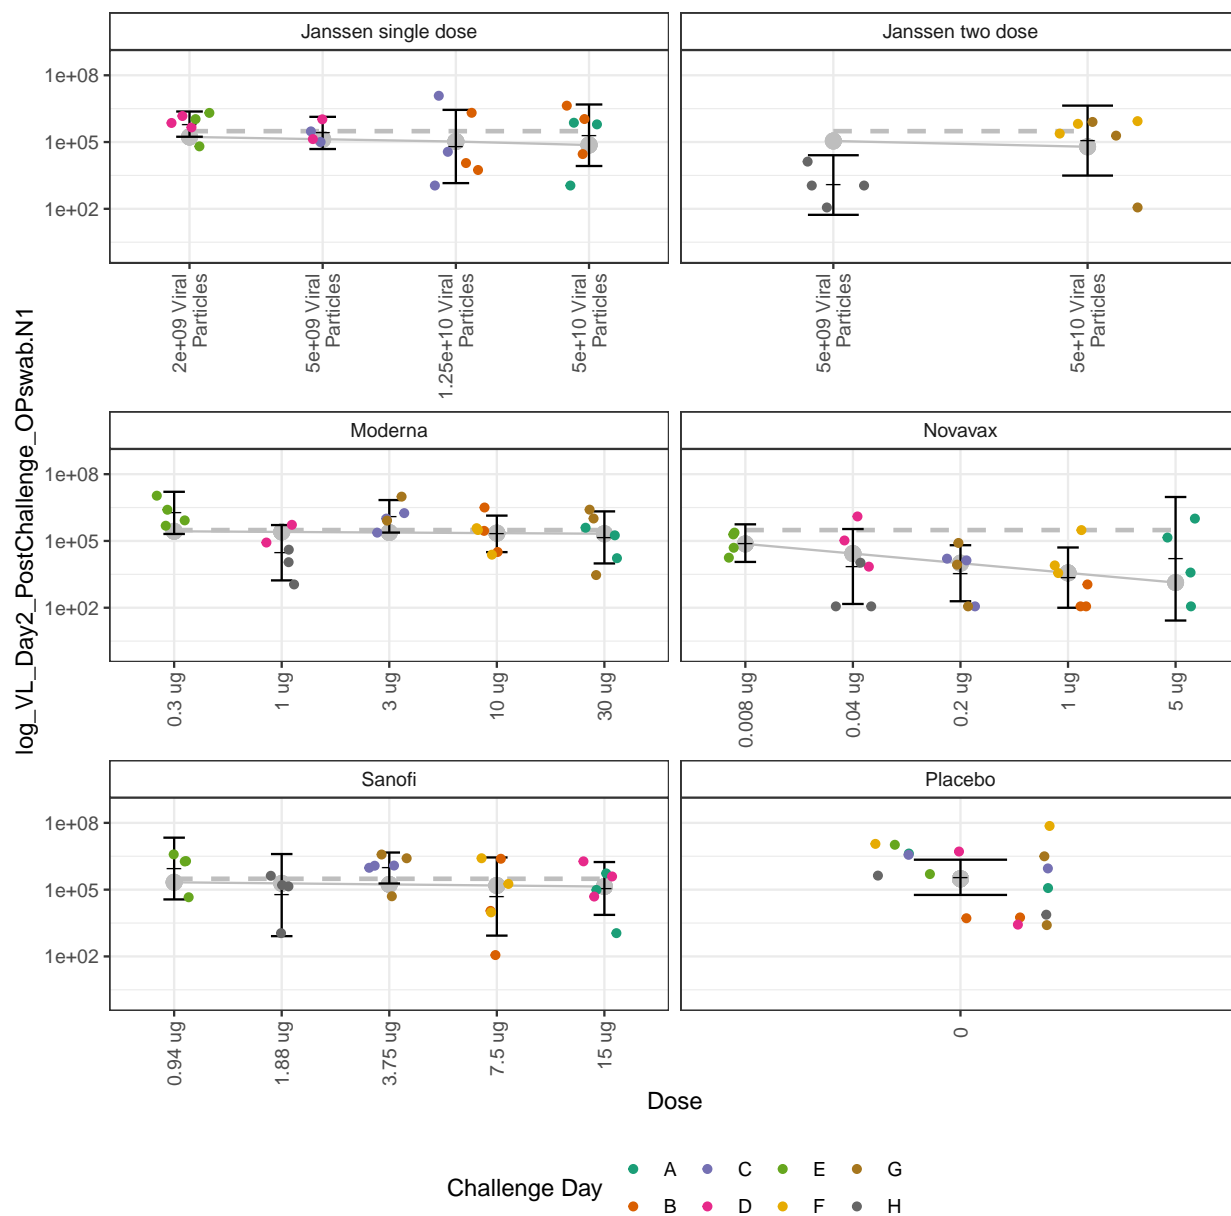

Figure 6.3.29

Table 6.3.26: Linear GEE Results, Single Dose Halved Dose Score log VL Day2 PostChallenge OP-swab.Subgenomic

|                    | Estimate | Lower | Upper | p      |
|--------------------|----------|-------|-------|--------|
| Intercept          | 4.50     | 3.58  | 5.43  | <0.001 |
| Janssen dose score | -0.22    | -0.56 | 0.12  | 0.169  |
| Moderna dose score | -0.09    | -0.41 | 0.24  | 0.532  |
| Novavax dose score | -0.58    | -1.01 | -0.15 | 0.019  |
| Sanofi dose score  | -0.18    | -0.62 | 0.26  | 0.362  |

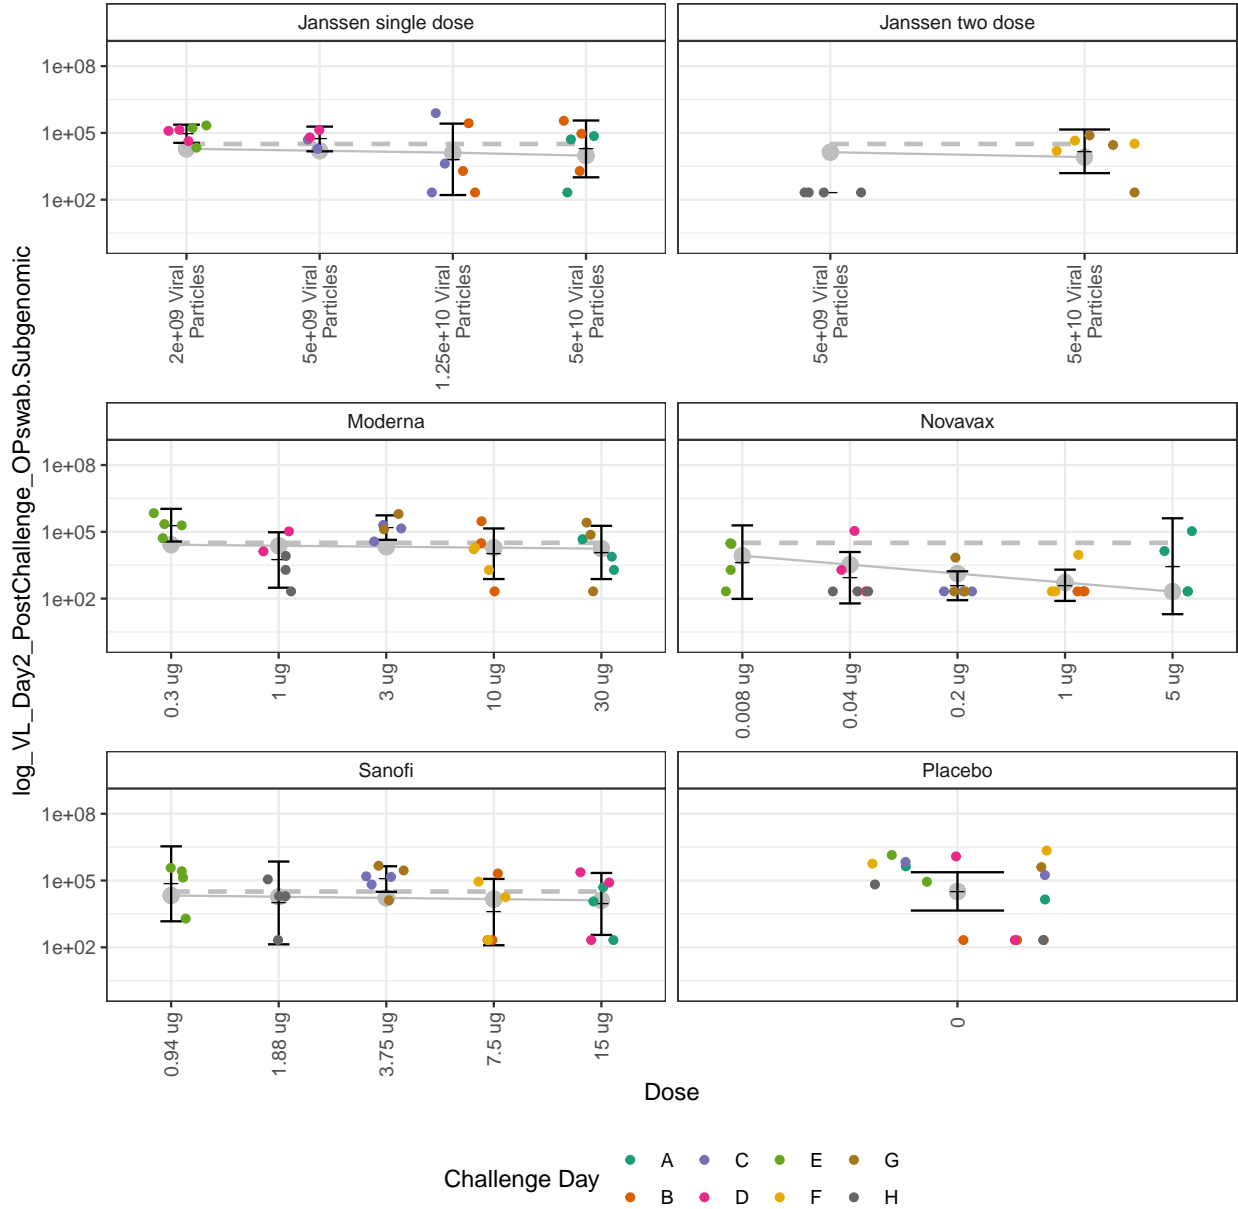

Figure 6.3.30

Table 6.3.27: Linear GEE Results, Single Dose Halved Dose Score log VL Day2 PostChallenge NasalSwab.N1

|                    | Estimate | Lower | Upper | p      |
|--------------------|----------|-------|-------|--------|
| Intercept          | 7.48     | 6.83  | 8.14  | <0.001 |
| Janssen dose score | -0.48    | -0.90 | -0.05 | 0.033  |
| Moderna dose score | -0.42    | -0.79 | -0.05 | 0.032  |
| Novavax dose score | -0.87    | -1.53 | -0.20 | 0.02   |
| Sanofi dose score  | -0.47    | -0.84 | -0.09 | 0.022  |

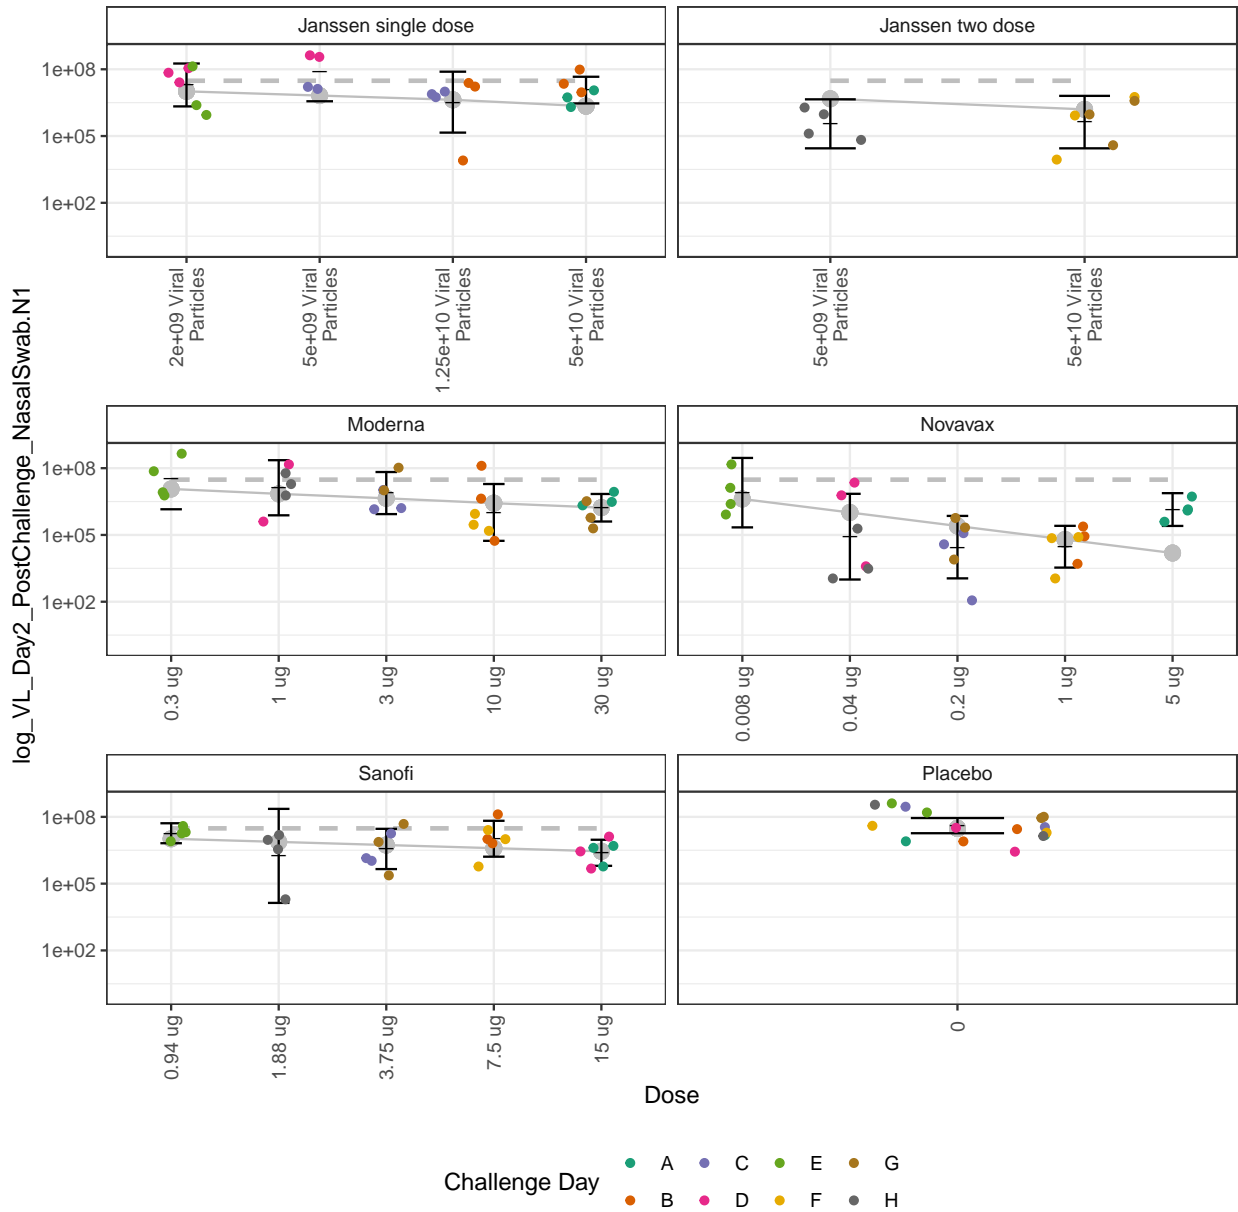

Figure 6.3.31

Table 6.3.28: Linear GEE Results, Single Dose Halved Dose Score log VL Day2 PostChallenge Nasal-Swab.Subgenomic

|                    | Estimate | Lower | Upper | p      |
|--------------------|----------|-------|-------|--------|
| Intercept          | 6.28     | 5.56  | 6.99  | <0.001 |
| Janssen dose score | -0.52    | -0.96 | -0.07 | 0.029  |
| Moderna dose score | -0.47    | -0.96 | 0.01  | 0.053  |
| Novavax dose score | -1.00    | -1.82 | -0.17 | 0.027  |
| Sanofi dose score  | -0.44    | -0.82 | -0.06 | 0.031  |

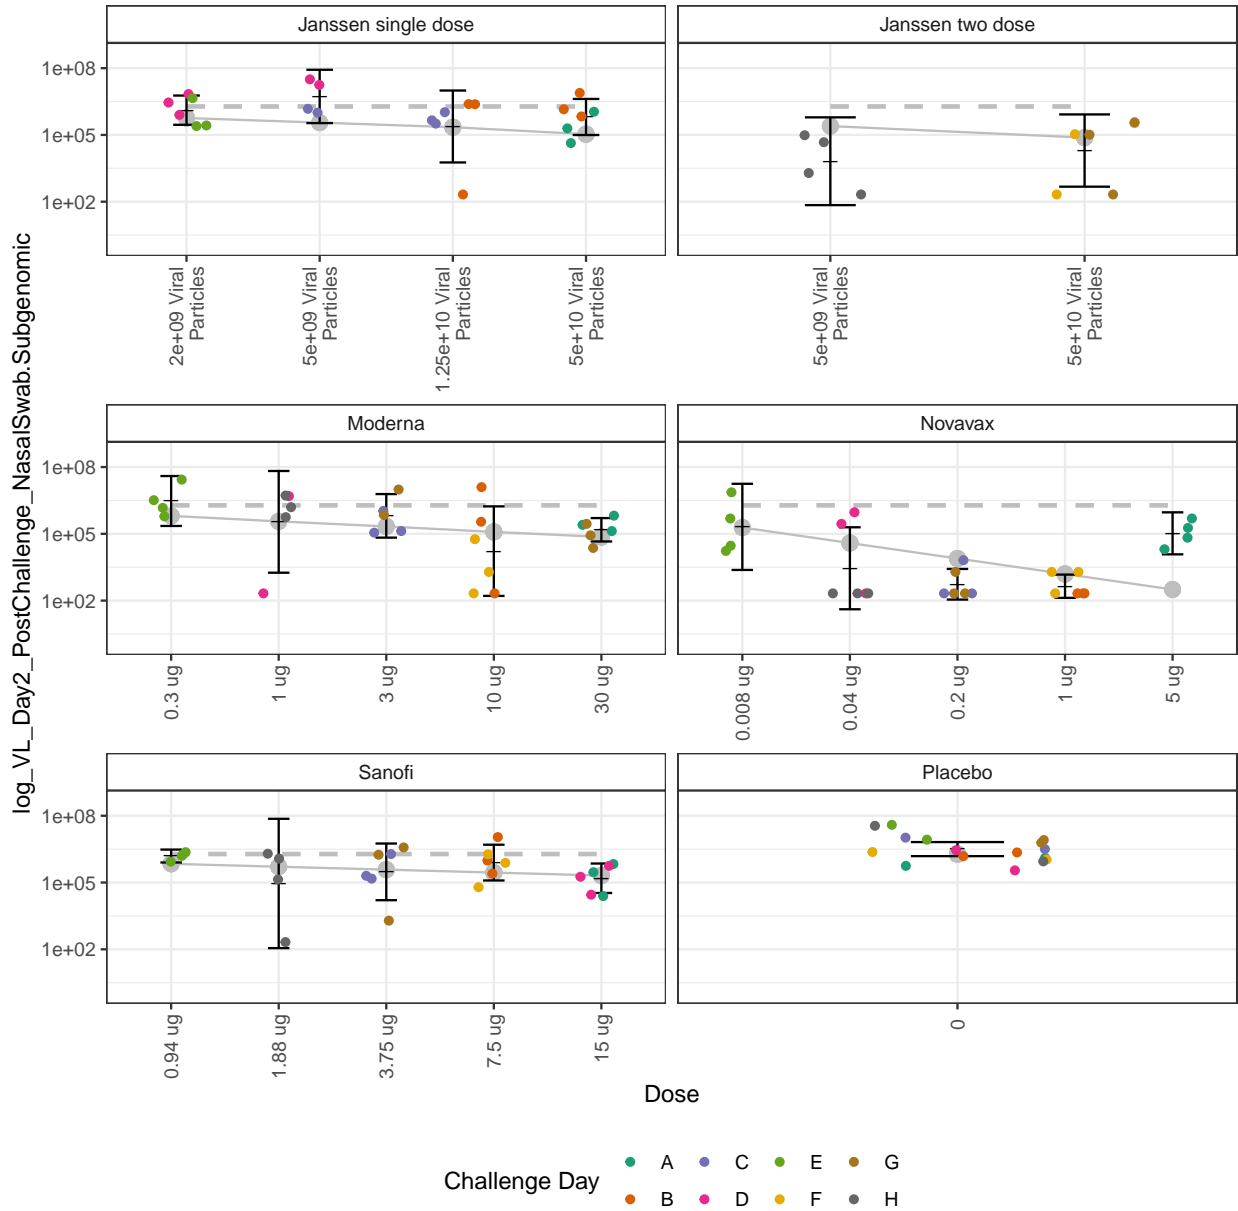

Figure 6.3.32

**Single dose group removed:**

Table 6.3.29: Linear GEE Results, Original Dose Score Single Dose Group Removed AUC BAL.N1

|                    | Estimate | Lower | Upper | p      |
|--------------------|----------|-------|-------|--------|
| Intercept          | 38.59    | 35.49 | 41.69 | <0.001 |
| Janssen dose score | -6.76    | -9.15 | -4.38 | 0.002  |
| Moderna dose score | -2.48    | -5.78 | 0.82  | 0.114  |
| Novavax dose score | -5.50    | -7.79 | -3.21 | 0.002  |
| Sanofi dose score  | -4.33    | -6.44 | -2.22 | 0.002  |

Table 6.3.30: Linear GEE Results, Original Dose Score Single Dose Group Removed AUC BAL.Subgenomic

|                    | Estimate | Lower | Upper | p      |
|--------------------|----------|-------|-------|--------|
| Intercept          | 31.38    | 28.73 | 34.03 | <0.001 |
| Janssen dose score | -4.23    | -6.54 | -1.92 | 0.01   |
| Moderna dose score | -1.80    | -3.91 | 0.30  | 0.08   |
| Novavax dose score | -3.45    | -4.55 | -2.36 | 0.001  |
| Sanofi dose score  | -3.03    | -4.63 | -1.44 | 0.003  |

Table 6.3.31: Linear GEE Results, Original Dose Score Single Dose Group Removed AUC Nasal Swab.N1

|                    | Estimate | Lower  | Upper | p      |
|--------------------|----------|--------|-------|--------|
| Intercept          | 67.57    | 62.37  | 72.76 | <0.001 |
| Janssen dose score | -8.63    | -12.81 | -4.45 | 0.007  |
| Moderna dose score | -2.69    | -5.05  | -0.34 | 0.031  |
| Novavax dose score | -8.81    | -12.99 | -4.64 | 0.003  |
| Sanofi dose score  | -5.98    | -9.15  | -2.81 | 0.003  |

Table 6.3.32: Linear GEE Results, Original Dose Score Single Dose Group Removed AUC Nasal Swab.Subgenomic

|                    | Estimate | Lower | Upper | p      |
|--------------------|----------|-------|-------|--------|
| Intercept          | 48.00    | 45.03 | 50.98 | <0.001 |
| Janssen dose score | -4.64    | -7.39 | -1.89 | 0.012  |
| Moderna dose score | -1.58    | -2.98 | -0.18 | 0.033  |
| Novavax dose score | -4.19    | -6.43 | -1.96 | 0.005  |
| Sanofi dose score  | -2.41    | -4.64 | -0.18 | 0.038  |

Table 6.3.33: Linear GEE Results, Original Dose Score Single Dose Group Removed AUC OP Swab.N1

|                    | Estimate | Lower | Upper | p      |
|--------------------|----------|-------|-------|--------|
| Intercept          | 50.00    | 46.09 | 53.92 | <0.001 |
| Janssen dose score | -5.51    | -8.25 | -2.76 | 0.007  |
| Moderna dose score | -2.47    | -4.94 | 0.01  | 0.051  |
| Novavax dose score | -5.17    | -7.60 | -2.75 | 0.003  |
| Sanofi dose score  | -3.64    | -6.27 | -1.00 | 0.015  |

Table 6.3.34: Linear GEE Results, Original Dose Score Single Dose Group Removed AUC OP Swab.Subgenomic

|                    | Estimate | Lower | Upper | p      |
|--------------------|----------|-------|-------|--------|
| Intercept          | 42.38    | 39.58 | 45.19 | <0.001 |
| Janssen dose score | -3.10    | -4.71 | -1.48 | 0.009  |
| Moderna dose score | -1.15    | -2.65 | 0.35  | 0.109  |
| Novavax dose score | -2.64    | -4.00 | -1.28 | 0.004  |
| Sanofi dose score  | -1.49    | -2.87 | -0.10 | 0.039  |

Table 6.3.35: Linear GEE Results, Original Dose Score Single Dose Group Removed log VL Day2 PostChallenge BAL.N1

|                    | Estimate | Lower | Upper | p      |
|--------------------|----------|-------|-------|--------|
| Intercept          | 5.99     | 5.50  | 6.47  | <0.001 |
| Janssen dose score | -0.81    | -1.58 | -0.04 | 0.044  |
| Moderna dose score | -0.44    | -1.00 | 0.12  | 0.103  |
| Novavax dose score | -0.75    | -1.16 | -0.35 | 0.005  |
| Sanofi dose score  | -0.31    | -0.67 | 0.04  | 0.075  |

Table 6.3.36: Linear GEE Results, Original Dose Score Single Dose Group Removed log VL Day2 PostChallenge BAL.Subgenomic

|                    | Estimate | Lower | Upper | p      |
|--------------------|----------|-------|-------|--------|
| Intercept          | 4.91     | 4.32  | 5.50  | <0.001 |
| Janssen dose score | -0.74    | -1.47 | -0.01 | 0.049  |
| Moderna dose score | -0.47    | -0.98 | 0.05  | 0.068  |
| Novavax dose score | -0.78    | -1.15 | -0.41 | 0.003  |
| Sanofi dose score  | -0.40    | -0.80 | 0.00  | 0.049  |

Table 6.3.37: Linear GEE Results, Original Dose Score Single Dose Group Removed log VL Day2 PostChallenge OPswab.N1

|                    | Estimate | Lower | Upper | p      |
|--------------------|----------|-------|-------|--------|
| Intercept          | 5.35     | 4.23  | 6.47  | <0.001 |
| Janssen dose score | -0.45    | -1.27 | 0.38  | 0.179  |
| Moderna dose score | 0.01     | -0.39 | 0.40  | 0.972  |
| Novavax dose score | -0.57    | -0.98 | -0.16 | 0.017  |
| Sanofi dose score  | -0.08    | -0.61 | 0.45  | 0.731  |

Table 6.3.38: Linear GEE Results, Original Dose Score Single Dose Group Removed log VL Day2 PostChallenge OPswab.Subgenomic

|                    | Estimate | Lower | Upper | p      |
|--------------------|----------|-------|-------|--------|
| Intercept          | 4.34     | 3.29  | 5.39  | <0.001 |
| Janssen dose score | -0.36    | -1.07 | 0.35  | 0.198  |
| Moderna dose score | -0.02    | -0.39 | 0.36  | 0.916  |
| Novavax dose score | -0.52    | -0.96 | -0.07 | 0.031  |
| Sanofi dose score  | -0.09    | -0.61 | 0.44  | 0.702  |

Table 6.3.39: Linear GEE Results, Original Dose Score Single Dose Group Removed log VL Day2 PostChallenge NasalSwab.N1

|                    | Estimate | Lower | Upper | p      |
|--------------------|----------|-------|-------|--------|
| Intercept          | 7.34     | 6.63  | 8.05  | <0.001 |
| Janssen dose score | -0.99    | -1.49 | -0.49 | 0.007  |
| Moderna dose score | -0.36    | -0.73 | 0.02  | 0.058  |
| Novavax dose score | -0.82    | -1.46 | -0.17 | 0.023  |
| Sanofi dose score  | -0.39    | -0.76 | -0.02 | 0.042  |

Table 6.3.40: Linear GEE Results, Original Dose Score Single Dose Group Removed log VL Day2 PostChallenge NasalSwab.Subgenomic

|                    | Estimate | Lower | Upper | p      |
|--------------------|----------|-------|-------|--------|
| Intercept          | 6.10     | 5.31  | 6.89  | <0.001 |
| Janssen dose score | -1.10    | -1.75 | -0.45 | 0.012  |
| Moderna dose score | -0.40    | -0.88 | 0.09  | 0.09   |
| Novavax dose score | -0.93    | -1.74 | -0.12 | 0.032  |
| Sanofi dose score  | -0.34    | -0.71 | 0.03  | 0.068  |

## Dose Response on Viral Load - Binary

### Wilcoxon-Mann-Whitney

#### By Vaccine Product:

Table 6.3.41: Wilcoxon Mann Whitney test p values of Dose Score with Binary Viral Load By Vaccine

|                                                         | Janssen<br>Original<br>Dose<br>Score | Janssen<br>Single<br>Dose<br>Halved<br>Dose<br>Score | Janssen<br>Single<br>Dose<br>Removed | Moderna | Novavax | Sanofi |
|---------------------------------------------------------|--------------------------------------|------------------------------------------------------|--------------------------------------|---------|---------|--------|
| bin VL Day2<br>PostChallenge<br>BAL N1                  | NA                                   | NA                                                   | NA                                   | 0.179   | 0.971   | NA     |
| bin VL Day2<br>PostChallenge<br>BAL Subgenomic          | 0.916                                | 0.853                                                | 1                                    | 0.064   | 0.535   | 0.616  |
| bin VL Day2<br>PostChallenge<br>OPswab N1               | 0.776                                | 0.502                                                | 0.878                                | NA      | 0.535   | 0.633  |
| bin VL Day2<br>PostChallenge<br>OPswab<br>Subgenomic    | 0.946                                | 0.808                                                | 0.02                                 | 0.566   | 0.363   | 0.128  |
| bin VL Day2<br>PostChallenge<br>NasalSwab N1            | NA                                   | NA                                                   | NA                                   | NA      | 1       | NA     |
| bin VL Day2<br>PostChallenge<br>NasalSwab<br>Subgenomic | 0.389                                | 0.193                                                | 0.894                                | 0.935   | 1.000   | 0.376  |

*Note:*

NA is indicated when all animals for that vaccine manufacturer and viral load have a positive signal

## Overall

Table 6.3.42: Wilcoxon-Mann-Whitney Test p-value of Dose Score with Binary Viral Load Overall

|                                                         | Original Dose Score | Single Dose Halved Dose Score | Single Dose Group Removed |
|---------------------------------------------------------|---------------------|-------------------------------|---------------------------|
| bin VL Day2<br>PostChallenge<br>BAL N1                  | 0.082               | 0.099                         | 0.083                     |
| bin VL Day2<br>PostChallenge<br>BAL Subgenomic          | 0.001               | 0.001                         | <0.001                    |
| bin VL Day2<br>PostChallenge<br>OPswab N1               | 0.023               | 0.015                         | 0.046                     |
| bin VL Day2<br>PostChallenge<br>OPswab<br>Subgenomic    | 0.068               | 0.042                         | 0.153                     |
| bin VL Day2<br>PostChallenge<br>NasalSwab N1            | 0.385               | 0.432                         | 0.375                     |
| bin VL Day2<br>PostChallenge<br>NasalSwab<br>Subgenomic | 0.004               | 0.004                         | 0.008                     |

## Logistic GEE

### Original dose score:

[1] “Model not fit for bin VL Day2 PostChallenge BAL.N1 due to the logistic model for probability has fitted value very close to 1. This occurs when at least one vaccine manufacturer has all positive responses.”

Table 6.3.43: Logistic GEE Results, Original Dose Score bin VL Day2 PostChallenge BAL.Subgenomic

|                    | Estimate | Lower | Upper | p     |
|--------------------|----------|-------|-------|-------|
| Intercept          | 1.65     | 0.46  | 2.85  | 0.015 |
| Janssen dose score | -0.43    | -1.25 | 0.38  | 0.242 |
| Moderna dose score | -0.57    | -1.36 | 0.23  | 0.131 |
| Novavax dose score | -1.08    | -1.64 | -0.52 | 0.003 |
| Sanofi dose score  | -0.33    | -1.17 | 0.50  | 0.366 |

[1] “Model not fit for bin VL Day2 PostChallenge OPswab.N1 due to the logistic model for probability has fitted value very close to 1. This occurs when at least one vaccine manufacturer has all positive responses.”

Table 6.3.44: Logistic GEE Results, Original Dose Score bin VL Day2 PostChallenge OPswab.Subgenomic

|                    | Estimate | Lower | Upper | p     |
|--------------------|----------|-------|-------|-------|
| Intercept          | 1.06     | -0.59 | 2.70  | 0.167 |
| Janssen dose score | 0.03     | -0.70 | 0.76  | 0.918 |
| Moderna dose score | 0.38     | -0.20 | 0.95  | 0.158 |
| Novavax dose score | -0.69    | -1.37 | -0.01 | 0.047 |
| Sanofi dose score  | -0.01    | -0.79 | 0.76  | 0.967 |

[1] “Model not fit for bin VL Day2 PostChallenge NasalSwab.N1 due to the logistic model for probability has fitted value very close to 1. This occurs when at least one vaccine manufacturer has all positive responses.”

Table 6.3.45: Logistic GEE Results, Original Dose Score bin VL Day2 PostChallenge NasalSwab.Subgenomic

|                    | Estimate | Lower | Upper | p     |
|--------------------|----------|-------|-------|-------|
| Intercept          | 2.35     | 0.54  | 4.17  | 0.020 |
| Janssen dose score | -0.28    | -1.31 | 0.75  | 0.534 |
| Moderna dose score | -0.15    | -1.26 | 0.95  | 0.740 |
| Novavax dose score | -0.79    | -1.97 | 0.38  | 0.143 |
| Sanofi dose score  | 0.65     | -0.48 | 1.78  | 0.211 |

### Single Dose Halved Dose Score

The fitted line of predictions from the logistic GEE model is shown on the plots. Dashed horizontal lines are the placebo estimate from the model.

[1] “Model not fit for bin VL Day2 PostChallenge BAL.N1 due to the logistic model for probability has fitted value very close to 1. This occurs when at least one vaccine manufacturer has all positive responses.”

Table 6.3.46: Logistic GEE Results, Single Dose Halved Dose Score bin VL Day2 PostChallenge BAL.Subgenomic

|                    | Estimate | Lower | Upper | p     |
|--------------------|----------|-------|-------|-------|
| Intercept          | 1.71     | 0.54  | 2.87  | 0.012 |
| Janssen dose score | -0.46    | -1.19 | 0.28  | 0.178 |
| Moderna dose score | -0.59    | -1.38 | 0.20  | 0.115 |
| Novavax dose score | -1.10    | -1.65 | -0.55 | 0.002 |
| Sanofi dose score  | -0.37    | -1.18 | 0.45  | 0.311 |

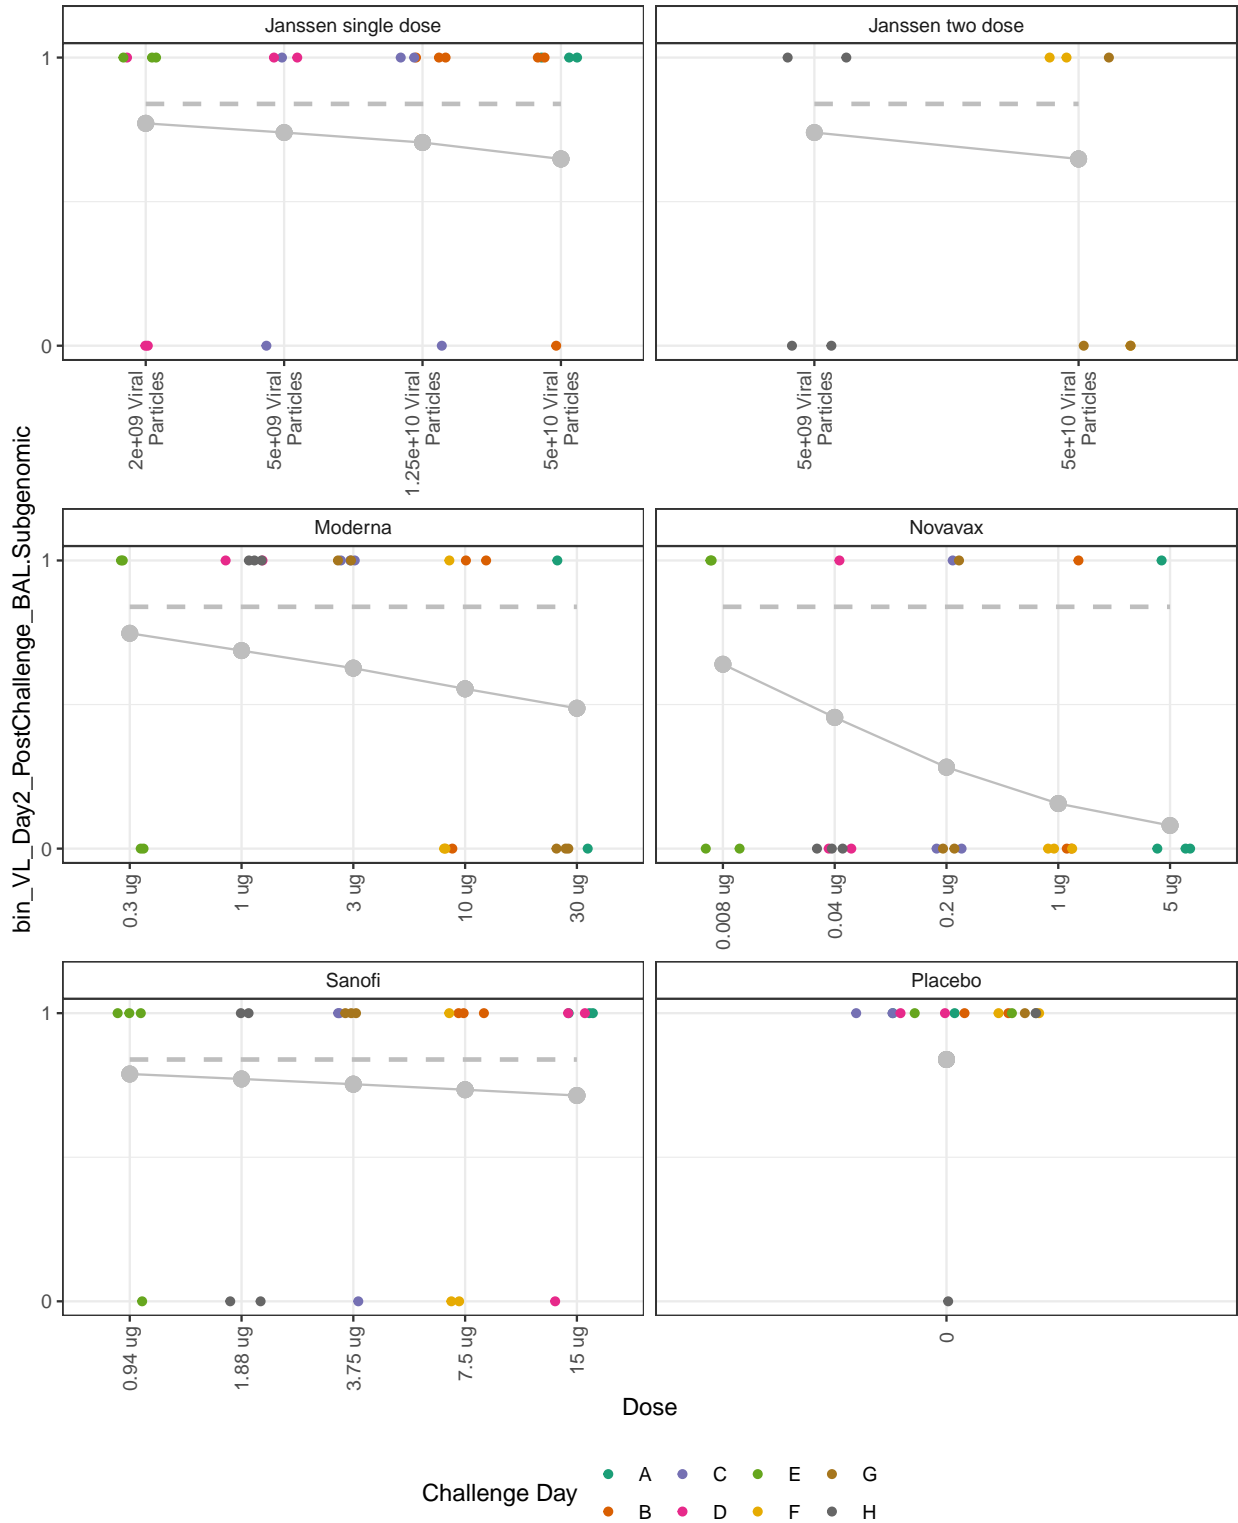

Figure 6.3.33

[1] “Model not fit for bin VL Day2 PostChallenge OPswab.N1 due to the logistic model for probability has fitted value very close to 1. This occurs when at least one vaccine manufacturer has all positive responses.”

Table 6.3.47: Logistic GEE Results, Single Dose Halved Dose Score bin VL Day2 PostChallenge OP-swab.Subgenomic

|                    | Estimate | Lower | Upper | p     |
|--------------------|----------|-------|-------|-------|
| Intercept          | 1.13     | -0.44 | 2.71  | 0.129 |
| Janssen dose score | -0.04    | -0.74 | 0.66  | 0.894 |
| Moderna dose score | 0.34     | -0.21 | 0.90  | 0.178 |
| Novavax dose score | -0.72    | -1.41 | -0.04 | 0.041 |
| Sanofi dose score  | -0.06    | -0.78 | 0.67  | 0.854 |

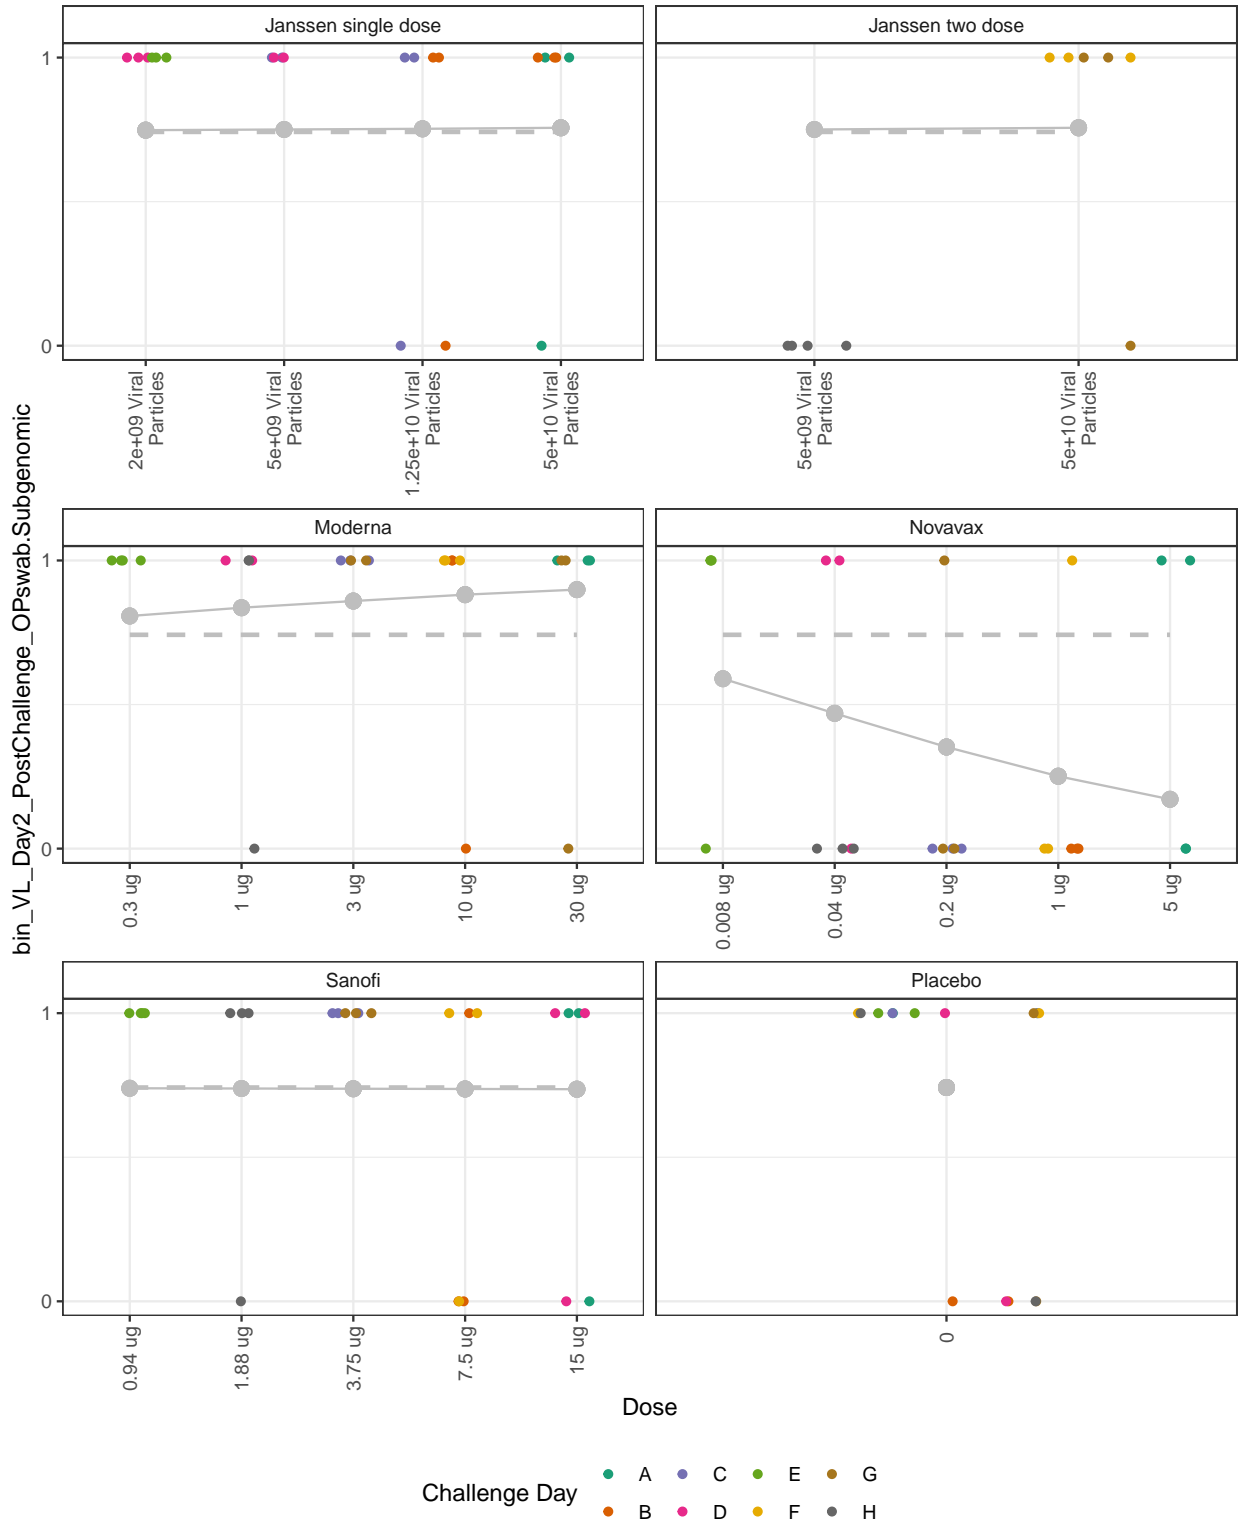

Figure 6.3.34

[1] “Model not fit for bin VL Day2 PostChallenge NasalSwab.N1 due to the logistic model for probability has fitted value very close to 1. This occurs when at least one vaccine manufacturer has all positive responses.”

Table 6.3.48: Logistic GEE Results, Single Dose Halved Dose Score bin VL Day2 PostChallenge Nasal-Swab.Subgenomic

|                    | Estimate | Lower | Upper | p     |
|--------------------|----------|-------|-------|-------|
| Intercept          | 2.44     | 0.62  | 4.26  | 0.017 |
| Janssen dose score | -0.33    | -1.28 | 0.62  | 0.423 |
| Moderna dose score | -0.19    | -1.29 | 0.91  | 0.682 |
| Novavax dose score | -0.82    | -2.01 | 0.37  | 0.135 |
| Sanofi dose score  | 0.60     | -0.54 | 1.74  | 0.248 |

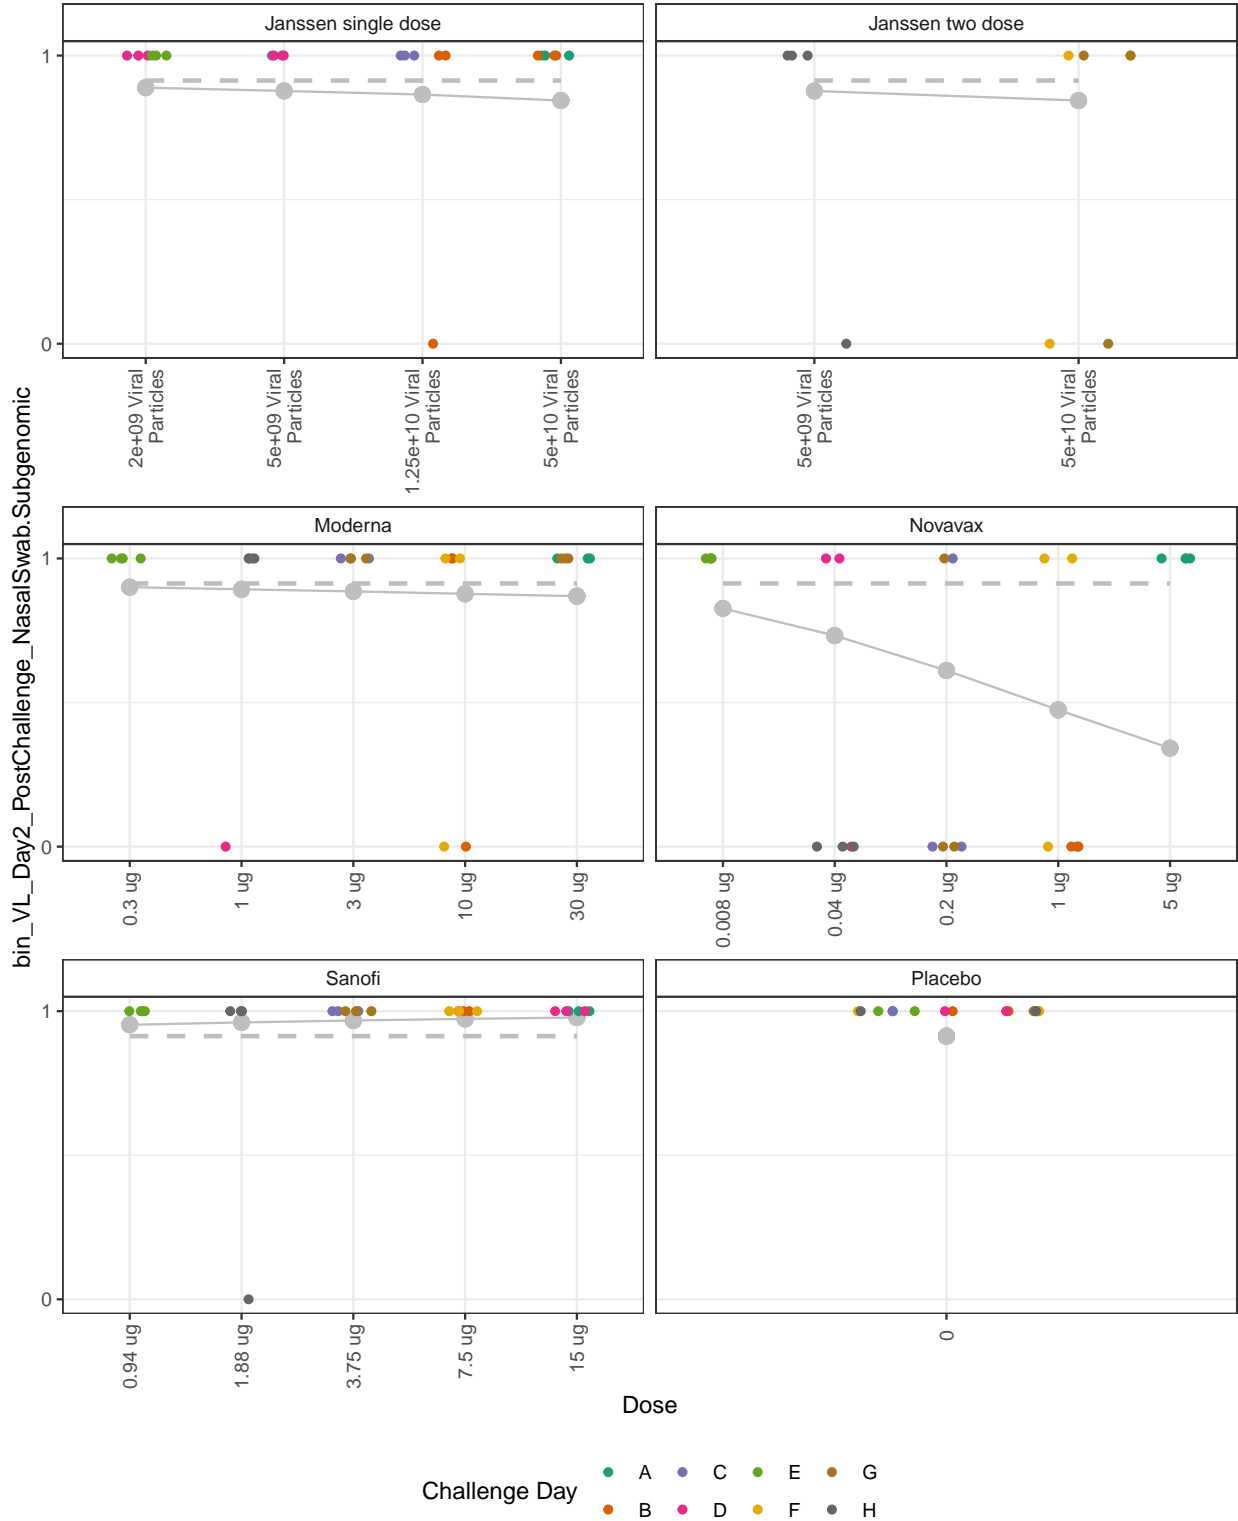

Figure 6.3.35

**Single dose group removed:**

[1] “Model not fit for bin VL Day2 PostChallenge BAL.N1 due to the logistic model for probability has fitted value very close to 1. This occurs when at least one vaccine manufacturer has all positive responses.”

Table 6.3.49: Logistic GEE Results, Original Dose Score Single Dose Group Removed bin VL Day2 PostChallenge BAL.Subgenomic

|                    | Estimate | Lower | Upper | p     |
|--------------------|----------|-------|-------|-------|
| Intercept          | 1.71     | 0.34  | 3.08  | 0.023 |
| Janssen dose score | -0.97    | -1.99 | 0.05  | 0.056 |
| Moderna dose score | -0.59    | -1.40 | 0.22  | 0.122 |
| Novavax dose score | -1.10    | -1.69 | -0.51 | 0.004 |
| Sanofi dose score  | -0.37    | -1.25 | 0.52  | 0.352 |

[1] “Model not fit for bin VL Day2 PostChallenge OPswab.N1 due to the logistic model for probability has fitted value very close to 1. This occurs when at least one vaccine manufacturer has all positive responses.”

Table 6.3.50: Logistic GEE Results, Original Dose Score Single Dose Group Removed bin VL Day2 PostChallenge OPswab.Subgenomic

|                    | Estimate | Lower | Upper | p     |
|--------------------|----------|-------|-------|-------|
| Intercept          | 0.79     | -0.77 | 2.35  | 0.262 |
| Janssen dose score | -0.16    | -1.57 | 1.25  | 0.742 |
| Moderna dose score | 0.50     | -0.08 | 1.08  | 0.080 |
| Novavax dose score | -0.59    | -1.23 | 0.04  | 0.062 |
| Sanofi dose score  | 0.14     | -0.64 | 0.92  | 0.686 |

[1] “Model not fit for bin VL Day2 PostChallenge NasalSwab.N1 due to the logistic model for probability has fitted value very close to 1. This occurs when at least one vaccine manufacturer has all positive responses.”

Table 6.3.51: Logistic GEE Results, Original Dose Score Single Dose Group Removed bin VL Day2 PostChallenge NasalSwab.Subgenomic

|                    | Estimate | Lower | Upper | p     |
|--------------------|----------|-------|-------|-------|
| Intercept          | 2.16     | 0.58  | 3.75  | 0.016 |
| Janssen dose score | -0.77    | -1.74 | 0.19  | 0.089 |
| Moderna dose score | -0.07    | -1.11 | 0.96  | 0.867 |
| Novavax dose score | -0.72    | -1.82 | 0.37  | 0.150 |
| Sanofi dose score  | 0.77     | -0.36 | 1.89  | 0.149 |
