# Supplementary material for: Humoral Immune Correlates Analysis of Four Vaccines Against SARS-CoV-2 in Rhesus Macaques
Source: Research Square preprint supplement (doi:10.21203/rs.3.rs-9404931/v1), 2026-04-30
Supplement: Supplementary file 3 [file 64a8850dea4fde3787a3d8fa.pdf]

# CoP SAP 6.5 and 6.6 Appendix

Allyson Mateja

2023-07-07

## 6.5 Appendix

As an appendix to section 6.5, we repeat the analysis using binned dose scores. The single-dose halved dose scores are binned as follows: 0, 1, (1, 1.5], (1.5, 2], (2, 2.5], (2.5, 3], > 3. This is being done in an attempt to improve the performance of the bootstrap confidence intervals.

## Numeric viral load

Table A6.5.1: Percent of Variance Explained by Immune Virus-Specific Antibodies - Numeric Viral Load with Binned Dose Score

|                                                              | log<br>MN 2<br>weeks<br>prior<br>chal-<br>lenge | log<br>MN<br>day<br>chal-<br>lenge | log<br>MSD<br>ECL 2<br>weeks<br>prior<br>chal-<br>lenge | log<br>MSD<br>ECL<br>day<br>chal-<br>lenge | log<br>PsVNA<br>ID50 2<br>weeks<br>prior<br>chal-<br>lenge | log<br>PsVNA<br>ID50<br>day<br>chal-<br>lenge | log<br>PsVNA<br>ID80 2<br>weeks<br>prior<br>chal-<br>lenge | log<br>PsVNA<br>ID80<br>day<br>chal-<br>lenge |
|--------------------------------------------------------------|-------------------------------------------------|------------------------------------|---------------------------------------------------------|--------------------------------------------|------------------------------------------------------------|-----------------------------------------------|------------------------------------------------------------|-----------------------------------------------|
| AUC BAL<br>N1                                                | 89.94<br>(77.35,<br>100)                        | 97.62<br>(93.97,<br>100)           | 89.83<br>(77.8,<br>100)                                 | 92.46<br>(86,<br>100)                      | 79.84<br>(65.43,<br>100)                                   | 78.31<br>(62.9,<br>100)                       | 81.76<br>(68.03,<br>100)                                   | 87.16<br>(76.9,<br>100)                       |
| AUC BAL<br>Subgenomic                                        | 89.47<br>(79.75,<br>100)                        | 100<br>(96.75,<br>100)             | 91.09<br>(79.44,<br>100)                                | 94.19<br>(85.69,<br>100)                   | 70.41<br>(51.05,<br>100)                                   | 64.13<br>(43.03,<br>100)                      | 76.7<br>(59.65,<br>100)                                    | 82.07<br>(65.49,<br>100)                      |
| AUC Nasal<br>Swab N1                                         | 93.81<br>(87.24,<br>100)                        | 94.69<br>(90.04,<br>100)           | 93.42<br>(88.7,<br>100)                                 | 90.28<br>(84.66,<br>100)                   | 85.79<br>(76.72,<br>99.7)                                  | 92.14<br>(85.16,<br>100)                      | 93.51<br>(89.27,<br>100)                                   | 99.61<br>(96.63,<br>100)                      |
| AUC Nasal<br>Swab<br>Subgenomic                              | 100<br>(96.71,<br>100)                          | 95.68<br>(92.13,<br>100)           | 96.89<br>(92.11,<br>100)                                | 93.71<br>(87.38,<br>100)                   | 94.71<br>(89.26,<br>100)                                   | 94.32<br>(87.52,<br>100)                      | 100<br>(97.49,<br>100)                                     | 100<br>(95.96,<br>100)                        |
| AUC OP<br>Swab N1                                            | 99.3<br>(96,<br>100)                            | 96.69<br>(92.63,<br>100)           | 97.34<br>(91.27,<br>100)                                | 95.39<br>(87.77,<br>100)                   | 93.31<br>(85.22,<br>100)                                   | 77.85<br>(40.67,<br>100)                      | 94.52<br>(88.36,<br>100)                                   | 98.17<br>(93.52,<br>100)                      |
| AUC OP<br>Swab<br>Subgenomic                                 | 100<br>(88.7,<br>100)                           | 95.08<br>(87.58,<br>100)           | 98.45<br>(91.08,<br>100)                                | 97.52<br>(89.66,<br>100)                   | 95.99<br>(86.09,<br>100)                                   | 66.43<br>(13.32,<br>99.1)                     | 99.83<br>(93.01,<br>100)                                   | 100<br>(90.27,<br>100)                        |
| log VL Day2<br>PostChal-<br>lenge BAL<br>N1                  | 87.48<br>(75.16,<br>100)                        | 100<br>(96.98,<br>100)             | 73.4<br>(57.4,<br>100)                                  | 74.92<br>(57.72,<br>100)                   | 95.72<br>(87.79,<br>100)                                   | 86.28<br>(74.16,<br>100)                      | 90.89<br>(81.91,<br>100)                                   | 93.44<br>(85.86,<br>100)                      |
| log VL Day2<br>PostChal-<br>lenge BAL<br>Subgenomic          | 94.95<br>(87.92,<br>100)                        | 100<br>(95.3,<br>100)              | 75.46<br>(58.32,<br>100)                                | 77.27<br>(61.26,<br>100)                   | 96.9<br>(87.34,<br>100)                                    | 90.61<br>(79.09,<br>100)                      | 93.43<br>(83.07,<br>100)                                   | 95.63<br>(86.64,<br>100)                      |
| log VL Day2<br>PostChal-<br>lenge<br>OPswab N1               | 86.82<br>(76.97,<br>100)                        | 81.86<br>(64.52,<br>100)           | 86.61<br>(70.85,<br>100)                                | 75.55<br>(54.51,<br>100)                   | 100<br>(87.5,<br>100)                                      | 97.27<br>(88.09,<br>100)                      | 100<br>(85.8,<br>100)                                      | 100<br>(87.05,<br>100)                        |
| log VL Day2<br>PostChal-<br>lenge<br>OPswab<br>Subgenomic    | 91.53<br>(80.86,<br>100)                        | 91.35<br>(79.56,<br>100)           | 88.21<br>(72.61,<br>100)                                | 79<br>(58.04,<br>100)                      | 100<br>(90.01,<br>100)                                     | 100<br>(86.32,<br>100)                        | 100<br>(86.44,<br>100)                                     | 100<br>(87.1,<br>100)                         |
| log VL Day2<br>PostChal-<br>lenge<br>NasalSwab<br>N1         | 99.75<br>(96.53,<br>100)                        | 95.94<br>(92.69,<br>100)           | 93.41<br>(88.56,<br>100)                                | 88.64<br>(82.32,<br>100)                   | 100<br>(97.99,<br>100)                                     | 96.03<br>(88.33,<br>100)                      | 100<br>(94.18,<br>100)                                     | 100<br>(97.35,<br>100)                        |
| log VL Day2<br>PostChal-<br>lenge<br>NasalSwab<br>Subgenomic | 100<br>(96.59,<br>100)                          | 99.9<br>(98.04,<br>100)            | 95.69<br>(91.52,<br>100)                                | 90.33<br>(86.57,<br>100)                   | 100<br>(98.1,<br>100)                                      | 97.29<br>(92.22,<br>100)                      | 100<br>(93.39,<br>100)                                     | 100<br>(96.23,<br>100)                        |

## Binary Viral Load

Table A6.5.2: Percent of Variance Explained by Immune Virus Specific Antibodies - Binary Viral Load with Binned Dose Score

|                                                              | log<br>MN 2<br>weeks<br>prior<br>chal-<br>lenge | log<br>MN<br>day<br>chal-<br>lenge | log<br>MSD<br>ECL 2<br>weeks<br>prior<br>chal-<br>lenge | log<br>MSD<br>ECL<br>day<br>chal-<br>lenge | log<br>PsVNA<br>ID50 2<br>weeks<br>prior<br>chal-<br>lenge | log<br>PsVNA<br>ID50<br>day<br>chal-<br>lenge | log<br>PsVNA<br>ID80 2<br>weeks<br>prior<br>chal-<br>lenge | log<br>PsVNA<br>ID80<br>day<br>chal-<br>lenge |
|--------------------------------------------------------------|-------------------------------------------------|------------------------------------|---------------------------------------------------------|--------------------------------------------|------------------------------------------------------------|-----------------------------------------------|------------------------------------------------------------|-----------------------------------------------|
| bin VL Day2<br>PostChal-<br>lenge BAL<br>N1                  | 100<br>(47.52,<br>100)                          | 70.74<br>(33.51,<br>100)           | 57.51<br>(13.39,<br>100)                                | 36.28<br>(6.21,<br>100)                    | 100<br>(59.88,<br>100)                                     | 100<br>(23.05,<br>100)                        | 100<br>(47.68,<br>100)                                     | 94.71<br>(60.67,<br>100)                      |
| bin VL Day2<br>PostChal-<br>lenge BAL<br>Subgenomic          | 96.86<br>(94.05,<br>100)                        | 100<br>(93.56,<br>100)             | 63.4<br>(45.07,<br>100)                                 | 59.58<br>(40.07,<br>100)                   | 100<br>(95.05,<br>100)                                     | 89.43<br>(81.2,<br>100)                       | 90.74<br>(82.85,<br>100)                                   | 97.98<br>(92.51,<br>100)                      |
| bin VL Day2<br>PostChal-<br>lenge<br>OPswab N1               | 100<br>(87.74,<br>100)                          | 100<br>(61.56,<br>100)             | 100<br>(56.95,<br>100)                                  | 100<br>(55.34,<br>100)                     | 92.26<br>(57.18,<br>100)                                   | 100<br>(68.52,<br>100)                        | 100<br>(52.8,<br>100)                                      | 100<br>(58.82,<br>100)                        |
| bin VL Day2<br>PostChal-<br>lenge<br>OPswab<br>Subgenomic    | 56.34<br>(31.89,<br>100)                        | 45.05<br>(18.62,<br>100)           | 35.52<br>(5.86,<br>97.38)                               | 26.85<br>(0.04,<br>79.58)                  | 73.99<br>(56.21,<br>100)                                   | 85.89<br>(75.34,<br>100)                      | 69.65<br>(50.72,<br>100)                                   | 69.65<br>(50.55,<br>100)                      |
| bin VL Day2<br>PostChal-<br>lenge<br>NasalSwab<br>N1         | 6.4 (0,<br>100)                                 | 17.42<br>(4.34,<br>53.78)          | 0 (0,<br>100)                                           | 0 (0,<br>100)                              | 9.83<br>(0,<br>100)                                        | 47.69<br>(0,<br>100)                          | 6.47<br>(0,<br>100)                                        | 1.08<br>(0,<br>17.12)                         |
| bin VL Day2<br>PostChal-<br>lenge<br>NasalSwab<br>Subgenomic | 100<br>(81.4,<br>100)                           | 100<br>(71.15,<br>100)             | 100<br>(70.98,<br>100)                                  | 100<br>(59.65,<br>100)                     | 100<br>(84.95,<br>100)                                     | 100<br>(84.07,<br>100)                        | 100<br>(64.4,<br>100)                                      | 100<br>(77.18,<br>100)                        |

## 6.6 Appendix

SAP section 6.6 is also repeated using larger bins of the single dose halved dose scores: 0, 1, (1, 2], >2. This was done to increase the amount of data in each bin, after splitting by vaccine.

## Numeric Viral Load

Table A6.6.1: Differential Vaccine Effect - Numeric Viral Load with Binned Dose Score

|                                                              | log<br>MN 2<br>weeks<br>prior<br>chal-<br>lenge | log<br>MN<br>day<br>chal-<br>lenge | log<br>MSD<br>ECL 2<br>weeks<br>prior<br>chal-<br>lenge | log<br>MSD<br>ECL<br>day<br>chal-<br>lenge | log<br>PsVNA<br>ID50 2<br>weeks<br>prior<br>chal-<br>lenge | log<br>PsVNA<br>ID50<br>day<br>chal-<br>lenge | log<br>PsVNA<br>ID80 2<br>weeks<br>prior<br>chal-<br>lenge | log<br>PsVNA<br>ID80<br>day<br>chal-<br>lenge |
|--------------------------------------------------------------|-------------------------------------------------|------------------------------------|---------------------------------------------------------|--------------------------------------------|------------------------------------------------------------|-----------------------------------------------|------------------------------------------------------------|-----------------------------------------------|
| AUC BAL<br>N1                                                | 90.83<br>(81.78,<br>100)                        | 100<br>(98.74,<br>100)             | 82.2<br>(71.22,<br>98.49)                               | 91.12<br>(86.59,<br>100)                   | 90.05<br>(83.97,<br>100)                                   | 94.08<br>(90.6,<br>100)                       | 88.38<br>(83.09,<br>100)                                   | 99.17<br>(97.17,<br>100)                      |
| AUC BAL<br>Subgenomic                                        | 98.51<br>(90.88,<br>100)                        | 100<br>(92.39,<br>100)             | 89.43<br>(81.26,<br>100)                                | 99<br>(96.66,<br>100)                      | 100<br>(94.17,<br>100)                                     | 100<br>(91.02,<br>100)                        | 92.67<br>(85.28,<br>100)                                   | 100<br>(88.47,<br>100)                        |
| AUC Nasal<br>Swab N1                                         | 73.23<br>(59.49,<br>88.79)                      | 74.78<br>(63.87,<br>90.93)         | 74.87<br>(61.2,<br>89.12)                               | 82.1<br>(73.1,<br>94.6)                    | 76.63<br>(64.24,<br>91.77)                                 | 77.08<br>(65.82,<br>92.99)                    | 74.05<br>(61.4,<br>88.19)                                  | 79.03<br>(67.49,<br>92.75)                    |
| AUC Nasal<br>Swab<br>Subgenomic                              | 86.82<br>(79.81,<br>99.26)                      | 88.36<br>(82.25,<br>100)           | 81.52<br>(71.94,<br>96.26)                              | 87.33<br>(80.52,<br>100)                   | 83.36<br>(74.84,<br>98.07)                                 | 82.26<br>(71.21,<br>96.1)                     | 81.41<br>(72.29,<br>96.06)                                 | 89.08<br>(83.46,<br>100)                      |
| AUC OP<br>Swab N1                                            | 67.88<br>(41.02,<br>92)                         | 71.5<br>(41.39,<br>94.19)          | 62.24<br>(36.79,<br>84.79)                              | 63.52<br>(36.06,<br>86.59)                 | 65.89<br>(38.49,<br>91.26)                                 | 66.53<br>(37.82,<br>91.12)                    | 62.73<br>(35.27,<br>87.41)                                 | 71.23<br>(42.62,<br>94.61)                    |
| AUC OP<br>Swab<br>Subgenomic                                 | 51.83<br>(23.64,<br>87.28)                      | 56.75<br>(25.5,<br>90.21)          | 43.9<br>(19,<br>76)                                     | 46.46<br>(22.26,<br>82.3)                  | 46.93<br>(22.19,<br>86.66)                                 | 45.59<br>(13.27,<br>75.82)                    | 43.66<br>(17.72,<br>80.29)                                 | 51.15<br>(21.64,<br>88.04)                    |
| log VL Day2<br>PostChal-<br>lenge BAL<br>N1                  | 91.18<br>(82.72,<br>100)                        | 90.76<br>(86.8,<br>100)            | 84.13<br>(75.23,<br>100)                                | 91.05<br>(87.88,<br>100)                   | 95.2<br>(91.94,<br>100)                                    | 88.34<br>(82.62,<br>100)                      | 93.02<br>(88.59,<br>100)                                   | 95.63<br>(91.83,<br>100)                      |
| log VL Day2<br>PostChal-<br>lenge BAL<br>Subgenomic          | 100<br>(95.7,<br>100)                           | 100<br>(96.58,<br>100)             | 93.02<br>(90.62,<br>100)                                | 97.3<br>(95.77,<br>100)                    | 100<br>(93.43,<br>100)                                     | 100<br>(93.65,<br>100)                        | 100<br>(99.31,<br>100)                                     | 100<br>(96.05,<br>100)                        |
| log VL Day2<br>PostChal-<br>lenge<br>OPswab N1               | 62.63<br>(44.15,<br>100)                        | 48.73<br>(24.74,<br>84.16)         | 58.13<br>(40.65,<br>100)                                | 57.89<br>(37.44,<br>90.53)                 | 64.07<br>(43.9,<br>100)                                    | 48.9<br>(26.66,<br>81.38)                     | 66.93<br>(49.33,<br>100)                                   | 74.42<br>(60.09,<br>100)                      |
| log VL Day2<br>PostChal-<br>lenge<br>OPswab<br>Subgenomic    | 75.54<br>(62.13,<br>100)                        | 65.74<br>(48.9,<br>100)            | 67.52<br>(51.14,<br>100)                                | 65.49<br>(46.92,<br>96.61)                 | 78.98<br>(67.89,<br>100)                                   | 61.01<br>(40.18,<br>92.85)                    | 75.14<br>(63.65,<br>100)                                   | 86.95<br>(78.79,<br>100)                      |
| log VL Day2<br>PostChal-<br>lenge<br>NasalSwab<br>N1         | 100<br>(94.25,<br>100)                          | 85.43<br>(77.89,<br>100)           | 97.27<br>(94.49,<br>100)                                | 100<br>(95,<br>100)                        | 100<br>(92.94,<br>100)                                     | 92.92<br>(87.79,<br>100)                      | 100<br>(95.48,<br>100)                                     | 100<br>(93.38,<br>100)                        |
| log VL Day2<br>PostChal-<br>lenge<br>NasalSwab<br>Subgenomic | 99.79<br>(96.45,<br>100)                        | 85.99<br>(81.05,<br>100)           | 96.38<br>(94.04,<br>100)                                | 98.43<br>(95.07,<br>100)                   | 100<br>(96.82,<br>100)                                     | 86.83<br>(79.01,<br>100)                      | 100<br>(96.66,<br>100)                                     | 100<br>(97.14,<br>100)                        |

## Binary Viral Load

Table A6.6.2: Differential Vaccine Effect - Binary Viral Load with Binned Dose Score

|                                                              | log<br>MN 2<br>weeks<br>prior<br>chal-<br>lenge | log<br>MN<br>day<br>chal-<br>lenge | log<br>MSD<br>ECL 2<br>weeks<br>prior<br>chal-<br>lenge | log<br>MSD<br>ECL<br>day<br>chal-<br>lenge | log<br>PsVNA<br>ID50 2<br>weeks<br>prior<br>chal-<br>lenge | log<br>PsVNA<br>ID50<br>day<br>chal-<br>lenge | log<br>PsVNA<br>ID80 2<br>weeks<br>prior<br>chal-<br>lenge | log<br>PsVNA<br>ID80<br>day<br>chal-<br>lenge |
|--------------------------------------------------------------|-------------------------------------------------|------------------------------------|---------------------------------------------------------|--------------------------------------------|------------------------------------------------------------|-----------------------------------------------|------------------------------------------------------------|-----------------------------------------------|
| bin VL Day2<br>PostChal-<br>lenge BAL<br>N1                  | 17.07<br>(0,<br>100)                            | 66.37<br>(0,<br>100)               | 100 (0,<br>100)                                         | 92.78<br>(0,<br>100)                       | 0 (0,<br>100)                                              | 0 (0,<br>100)                                 | 58.01<br>(0,<br>100)                                       | 49.78<br>(0,<br>100)                          |
| bin VL Day2<br>PostChal-<br>lenge BAL<br>Subgenomic          | 100<br>(85.16,<br>100)                          | 93.71<br>(77.39,<br>100)           | 100<br>(85.49,<br>100)                                  | 100<br>(85.75,<br>100)                     | 100<br>(81.14,<br>100)                                     | 94.91<br>(73.11,<br>100)                      | 97.26<br>(81.69,<br>100)                                   | 81.44<br>(58.53,<br>100)                      |
| bin VL Day2<br>PostChal-<br>lenge<br>OPswab N1               | 0 (0,<br>100)                                   | 0 (0,<br>100)                      | 45.43<br>(0,<br>100)                                    | 57.14<br>(0,<br>100)                       | 18.7<br>(0,<br>100)                                        | 0 (0,<br>100)                                 | 100<br>(42.36,<br>100)                                     | 96.29<br>(30.1,<br>100)                       |
| bin VL Day2<br>PostChal-<br>lenge<br>OPswab<br>Subgenomic    | 74.61<br>(53.24,<br>100)                        | 56.8<br>(28.02,<br>100)            | 72.56<br>(54.35,<br>100)                                | 84.63<br>(63.06,<br>100)                   | 73.26<br>(50.9,<br>100)                                    | 53.93<br>(26.98,<br>100)                      | 58.52<br>(30.87,<br>100)                                   | 95<br>(76.2,<br>100)                          |
| bin VL Day2<br>PostChal-<br>lenge<br>NasalSwab<br>N1         | 14.84<br>(0,<br>100)                            | 100<br>(100,<br>100)               | 0 (0,<br>100)                                           | 0 (0,<br>100)                              | 16.01<br>(0,<br>100)                                       | 5.99<br>(0,<br>100)                           | 17.23<br>(0,<br>100)                                       | 6.45<br>(0,<br>100)                           |
| bin VL Day2<br>PostChal-<br>lenge<br>NasalSwab<br>Subgenomic | 93.78<br>(51.33,<br>100)                        | 100<br>(55.08,<br>100)             | 69.36<br>(24.17,<br>100)                                | 92.69<br>(50.38,<br>100)                   | 76.48<br>(39.88,<br>100)                                   | 50.8<br>(19.12,<br>100)                       | 0 (0,<br>100)                                              | 58.87<br>(0,<br>100)                          |

## Additional Analysis - Base+Dose+Vacc vs. Base

As an additional analysis for the appendix, we compare the base model to the base+dose+vacc model. Details of the base model are explained in the SAP section 6.5. The base+dose+vacc model used here is slightly different than that described in SAP section 6.6. In this model, the single dose halved dose score is used as a numeric value, with a separate effect for each vaccine manufacturer. Linear models for numeric viral load (e.g., Section 6.4.1) or logistic models for binary viral load (more complicated models, regardless of what was selected by the cross-validation procedure in section 6.4.2, are not used) will be employed. The percentage of variance (PVE) is 100 times the adjusted R square value from the base model over the adjusted R squared values from the base+dose+vacc model. Confidence intervals on the PVE are calculated by using bias-adjusted nonparametric bootstrap methods (using 5000 replicates).

## Numeric Viral Load

Table A6.6.3: Compare Base to Base, Dose, Vacc - Numeric Viral Load with Binned Dose Score

|                                                              | log<br>MN 2<br>weeks<br>prior<br>chal-<br>lenge | log<br>MN<br>day<br>chal-<br>lenge | log<br>MSD<br>ECL 2<br>weeks<br>prior<br>chal-<br>lenge | log<br>MSD<br>ECL<br>day<br>chal-<br>lenge | log<br>PsVNA<br>ID50 2<br>weeks<br>prior<br>chal-<br>lenge | log<br>PsVNA<br>ID50<br>day<br>chal-<br>lenge | log<br>PsVNA<br>ID80 2<br>weeks<br>prior<br>chal-<br>lenge | log<br>PsVNA<br>ID80<br>day<br>chal-<br>lenge |
|--------------------------------------------------------------|-------------------------------------------------|------------------------------------|---------------------------------------------------------|--------------------------------------------|------------------------------------------------------------|-----------------------------------------------|------------------------------------------------------------|-----------------------------------------------|
| AUC BAL<br>N1                                                | 88.8<br>(81.23,<br>100)                         | 98.2<br>(96.63,<br>100)            | 77.71<br>(62.88,<br>96.09)                              | 85.42<br>(76.65,<br>100)                   | 71.53<br>(62.09,<br>94.64)                                 | 71.43<br>(60.72,<br>98.51)                    | 75.08<br>(66.23,<br>100)                                   | 85.9<br>(79.74,<br>100)                       |
| AUC BAL<br>Subgenomic                                        | 91.92<br>(85.6,<br>100)                         | 97.25<br>(93.52,<br>100)           | 80.09<br>(63.3,<br>100)                                 | 89.19<br>(77.58,<br>100)                   | 67.32<br>(56.23,<br>100)                                   | 63.02<br>(49.37,<br>100)                      | 72.22<br>(60.1,<br>100)                                    | 83.68<br>(73.51,<br>100)                      |
| AUC Nasal<br>Swab N1                                         | 77.44<br>(67.5,<br>91.85)                       | 78.51<br>(69.86,<br>95.34)         | 72.73<br>(62.82,<br>86.61)                              | 74.44<br>(65.03,<br>88.82)                 | 74.32<br>(64.72,<br>90.73)                                 | 74.52<br>(65.38,<br>91.74)                    | 76.64<br>(67.79,<br>91.24)                                 | 84.57<br>(76.9,<br>98.19)                     |
| AUC Nasal<br>Swab<br>Subgenomic                              | 88.38<br>(82.98,<br>99.07)                      | 85.29<br>(79.61,<br>99.33)         | 73.88<br>(62.91,<br>90.36)                              | 76.66<br>(66.94,<br>91.73)                 | 80.07<br>(73.37,<br>94.77)                                 | 77.34<br>(67.72,<br>93.07)                    | 81.68<br>(74.48,<br>92.93)                                 | 90.64<br>(86.61,<br>99.56)                    |
| AUC OP<br>Swab N1                                            | 82.53<br>(72.82,<br>100)                        | 92.28<br>(86.48,<br>100)           | 76.81<br>(62.11,<br>94.82)                              | 83.08<br>(71.26,<br>100)                   | 76.46<br>(69.89,<br>95.33)                                 | 71.1<br>(54.25,<br>94.11)                     | 83.63<br>(79,<br>100)                                      | 90.88<br>(86.33,<br>100)                      |
| AUC OP<br>Swab<br>Subgenomic                                 | 82.55<br>(70.55,<br>100)                        | 77.24<br>(44.5,<br>100)            | 71.52<br>(47.11,<br>94.7)                               | 79.33<br>(58.84,<br>100)                   | 70.62<br>(59.3,<br>98.01)                                  | 50.29<br>(13.47,<br>80.26)                    | 78.56<br>(69.63,<br>100)                                   | 82.46<br>(73.29,<br>100)                      |
| log VL Day2<br>PostChal-<br>lenge BAL<br>N1                  | 83.29<br>(75.83,<br>100)                        | 98.13<br>(97.55,<br>100)           | 65.1<br>(51.39,<br>91.13)                               | 73.82<br>(65.47,<br>97.18)                 | 90.1<br>(87.76,<br>100)                                    | 84.45<br>(81.57,<br>100)                      | 88.23<br>(84.16,<br>100)                                   | 92.5<br>(91.65,<br>100)                       |
| log VL Day2<br>PostChal-<br>lenge BAL<br>Subgenomic          | 86.67<br>(80.05,<br>100)                        | 100<br>(98.36,<br>100)             | 64.54<br>(48.56,<br>91.14)                              | 70.41<br>(56.83,<br>100)                   | 90.11<br>(84.84,<br>100)                                   | 87.88<br>(82.15,<br>100)                      | 89.44<br>(82.98,<br>100)                                   | 89.96<br>(83.45,<br>100)                      |
| log VL Day2<br>PostChal-<br>lenge<br>OPswab N1               | 74.66<br>(65.32,<br>100)                        | 69.86<br>(59.88,<br>100)           | 60.18<br>(43.55,<br>100)                                | 51.88<br>(33.83,<br>100)                   | 76.82<br>(65.84,<br>100)                                   | 74.18<br>(62.21,<br>100)                      | 82.62<br>(75.78,<br>100)                                   | 92.8<br>(85.98,<br>100)                       |
| log VL Day2<br>PostChal-<br>lenge<br>OPswab<br>Subgenomic    | 77.99<br>(66.4,<br>100)                         | 78.61<br>(71.45,<br>100)           | 68.61<br>(51.21,<br>100)                                | 59.14<br>(39.53,<br>100)                   | 88.5<br>(84.59,<br>100)                                    | 84.97<br>(80.16,<br>100)                      | 88.99<br>(84.86,<br>100)                                   | 100<br>(97.59,<br>100)                        |
| log VL Day2<br>PostChal-<br>lenge<br>NasalSwab<br>N1         | 99.78<br>(94.37,<br>100)                        | 100<br>(98.13,<br>100)             | 81.02<br>(73.62,<br>100)                                | 78.98<br>(69.81,<br>100)                   | 100<br>(98.32,<br>100)                                     | 96.45<br>(93.61,<br>100)                      | 100<br>(95.88,<br>100)                                     | 100<br>(93.21,<br>100)                        |
| log VL Day2<br>PostChal-<br>lenge<br>NasalSwab<br>Subgenomic | 97.53<br>(93.73,<br>100)                        | 99.21<br>(97.65,<br>100)           | 81.3<br>(76.45,<br>100)                                 | 78.89<br>(72.7,<br>100)                    | 97.15<br>(96.18,<br>100)                                   | 93.08<br>(88.54,<br>100)                      | 99.74<br>(99.11,<br>100)                                   | 100<br>(96.06,<br>100)                        |

## Binary Viral Load

Table A6.6.4: Compare Base to Base, Dose, Vacc - Binary Viral Load with Binned Dose Score

|                                                              | log<br>MN 2<br>weeks<br>prior<br>chal-<br>lenge | log<br>MN<br>day<br>chal-<br>lenge | log<br>MSD<br>ECL 2<br>weeks<br>prior<br>chal-<br>lenge | log<br>MSD<br>ECL<br>day<br>chal-<br>lenge | log<br>PsVNA<br>ID50 2<br>weeks<br>prior<br>chal-<br>lenge | log<br>PsVNA<br>ID50<br>day<br>chal-<br>lenge | log<br>PsVNA<br>ID80 2<br>weeks<br>prior<br>chal-<br>lenge | log<br>PsVNA<br>ID80<br>day<br>chal-<br>lenge |
|--------------------------------------------------------------|-------------------------------------------------|------------------------------------|---------------------------------------------------------|--------------------------------------------|------------------------------------------------------------|-----------------------------------------------|------------------------------------------------------------|-----------------------------------------------|
| bin VL Day2<br>PostChal-<br>lenge BAL<br>N1                  | 100<br>(41.59,<br>100)                          | 100<br>(58.73,<br>100)             | 47.52<br>(19.33,<br>100)                                | 39.4<br>(21.56,<br>100)                    | 100<br>(54.98,<br>100)                                     | 100<br>(40.25,<br>100)                        | 100<br>(31.39,<br>100)                                     | 94.41<br>(52.57,<br>100)                      |
| bin VL Day2<br>PostChal-<br>lenge BAL<br>Subgenomic          | 78.31<br>(72.4,<br>100)                         | 100<br>(93.43,<br>100)             | 56.34<br>(42.3,<br>95.48)                               | 56.84<br>(42.28,<br>93.22)                 | 91.82<br>(91.8,<br>100)                                    | 95.69<br>(99.49,<br>100)                      | 80.1<br>(75.17,<br>100)                                    | 90.63<br>(90.36,<br>100)                      |
| bin VL Day2<br>PostChal-<br>lenge<br>OPswab N1               | 67.02<br>(36.22,<br>100)                        | 100<br>(66.55,<br>100)             | 47.13<br>(14.31,<br>100)                                | 48.92<br>(18.68,<br>100)                   | 46.6<br>(19.47,<br>100)                                    | 63.65<br>(28.73,<br>100)                      | 65.52<br>(32.43,<br>100)                                   | 75.53<br>(43.28,<br>100)                      |
| bin VL Day2<br>PostChal-<br>lenge<br>OPswab<br>Subgenomic    | 51.17<br>(37.48,<br>100)                        | 41.56<br>(23.17,<br>100)           | 28.27<br>(8.39,<br>68.77)                               | 29.51<br>(8.48,<br>72.69)                  | 62.51<br>(50.62,<br>100)                                   | 66.49<br>(59.65,<br>100)                      | 53.74<br>(41.58,<br>100)                                   | 74.4<br>(67.48,<br>100)                       |
| bin VL Day2<br>PostChal-<br>lenge<br>NasalSwab<br>N1         | 0 (0,<br>100)                                   | 17.42<br>(4.5,<br>58.69)           | 0 (0,<br>100)                                           | 0 (0,<br>100)                              | 3.85<br>(0,<br>100)                                        | 0 (0,<br>100)                                 | 2.92<br>(0,<br>100)                                        | 0 (0,<br>100)                                 |
| bin VL Day2<br>PostChal-<br>lenge<br>NasalSwab<br>Subgenomic | 67.83<br>(60.21,<br>100)                        | 83.21<br>(81.79,<br>100)           | 58.96<br>(47.45,<br>100)                                | 69.04<br>(60.12,<br>100)                   | 76.23<br>(63.96,<br>100)                                   | 58.64<br>(45.14,<br>100)                      | 100<br>(98.45,<br>100)                                     | 78.05<br>(70.11,<br>100)                      |
