# Supplementary material for: Humoral Immune Correlates Analysis of Four Vaccines Against SARS-CoV-2 in Rhesus Macaques
Source: Research Square preprint supplement (doi:10.21203/rs.3.rs-9404931/v1), 2026-04-30
Supplement: Supplementary file 4 [file 66304d45e78c4922f6693ea4.pdf]

# CoP SAP 6.4 Appendix

Allyson Mateja

June 26, 2023

## 6.4 Appendix: Prediction of Post-Challenge Viral Load with Single Virus-Specific Antibody

### Binary Viral Load

We graphically plot the virus-specific antibody for each vaccine product, stratified by animals with a positive signal and animals with a negative signal.

### Plots

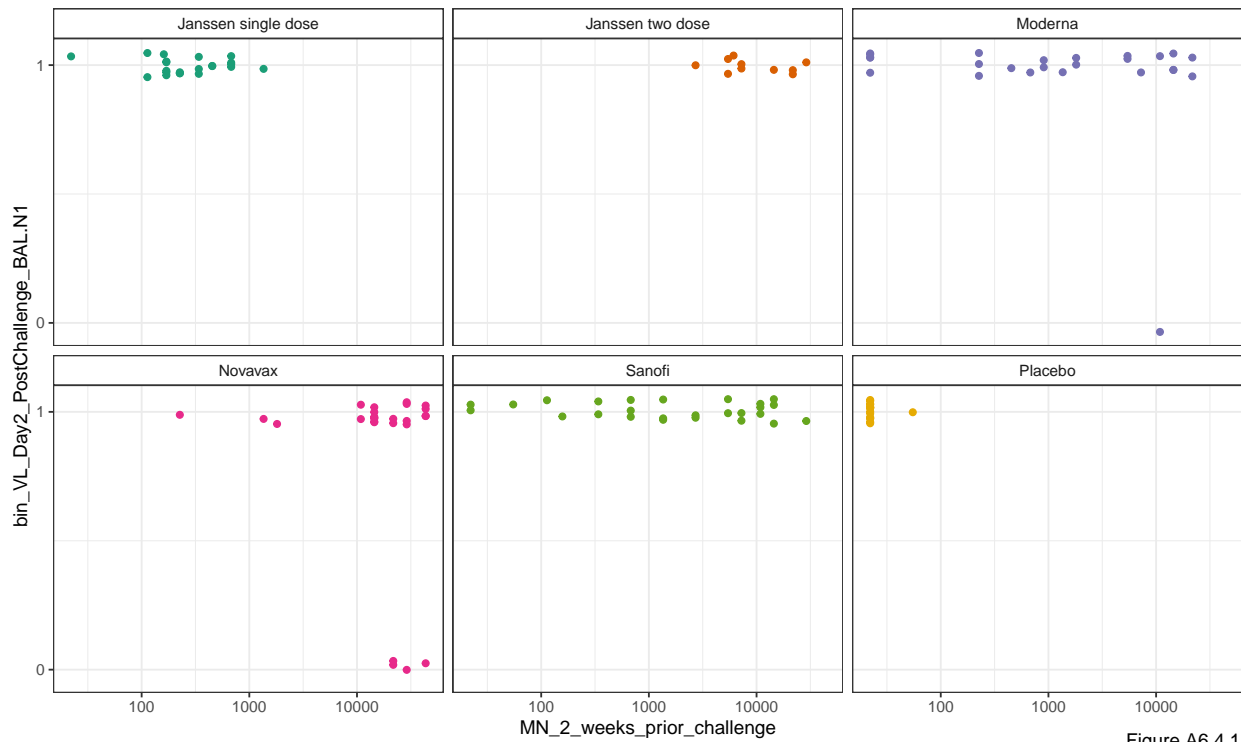

Figure A6.4.1

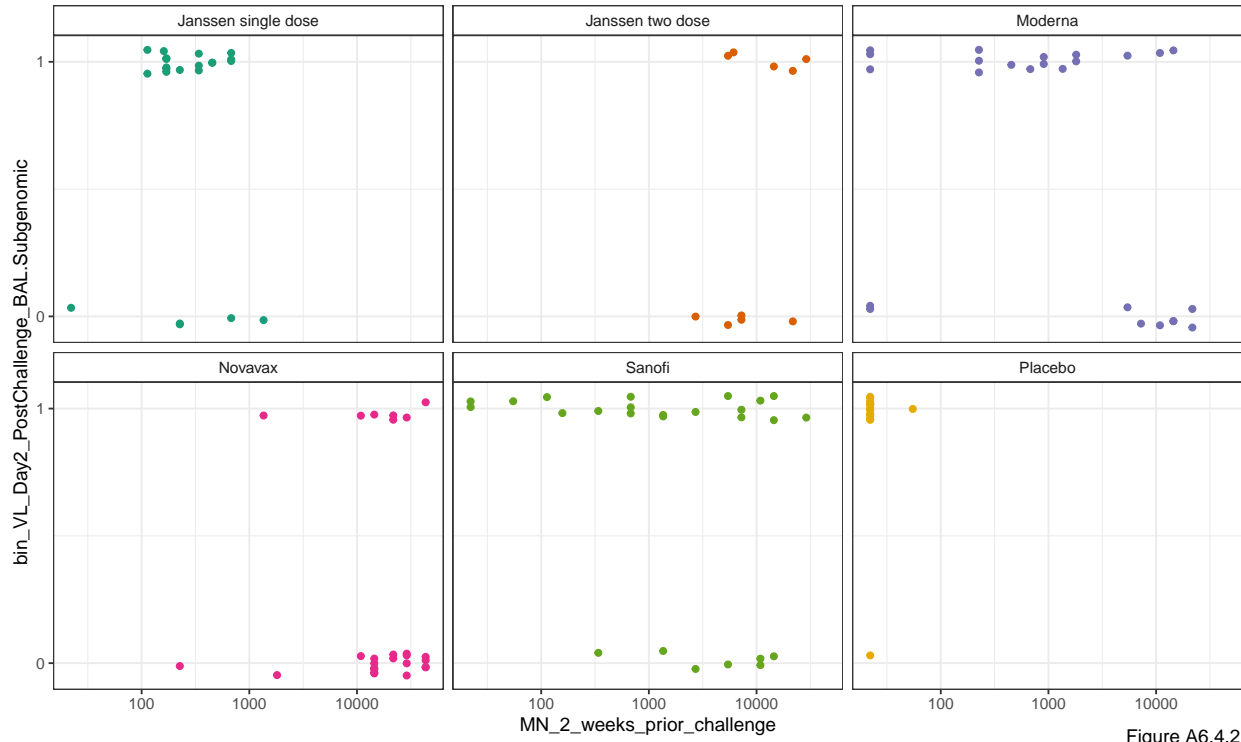

Figure A6.4.2

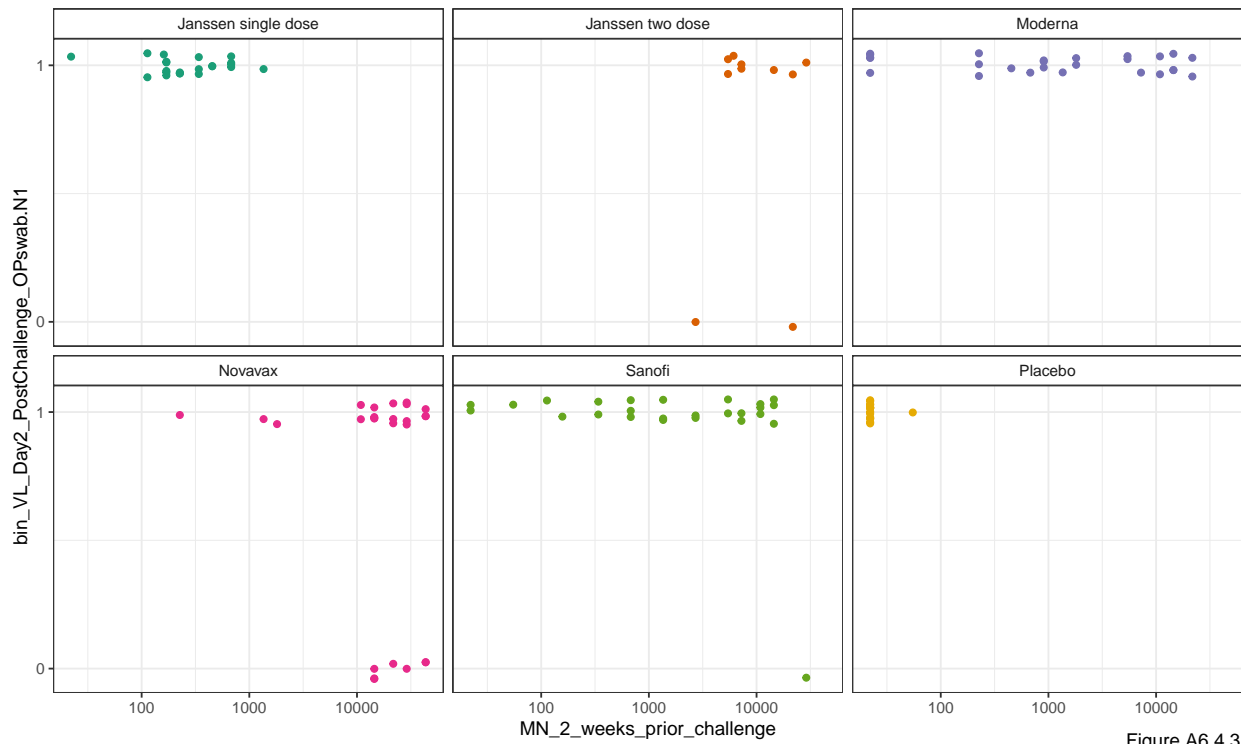

Figure A6.4.3

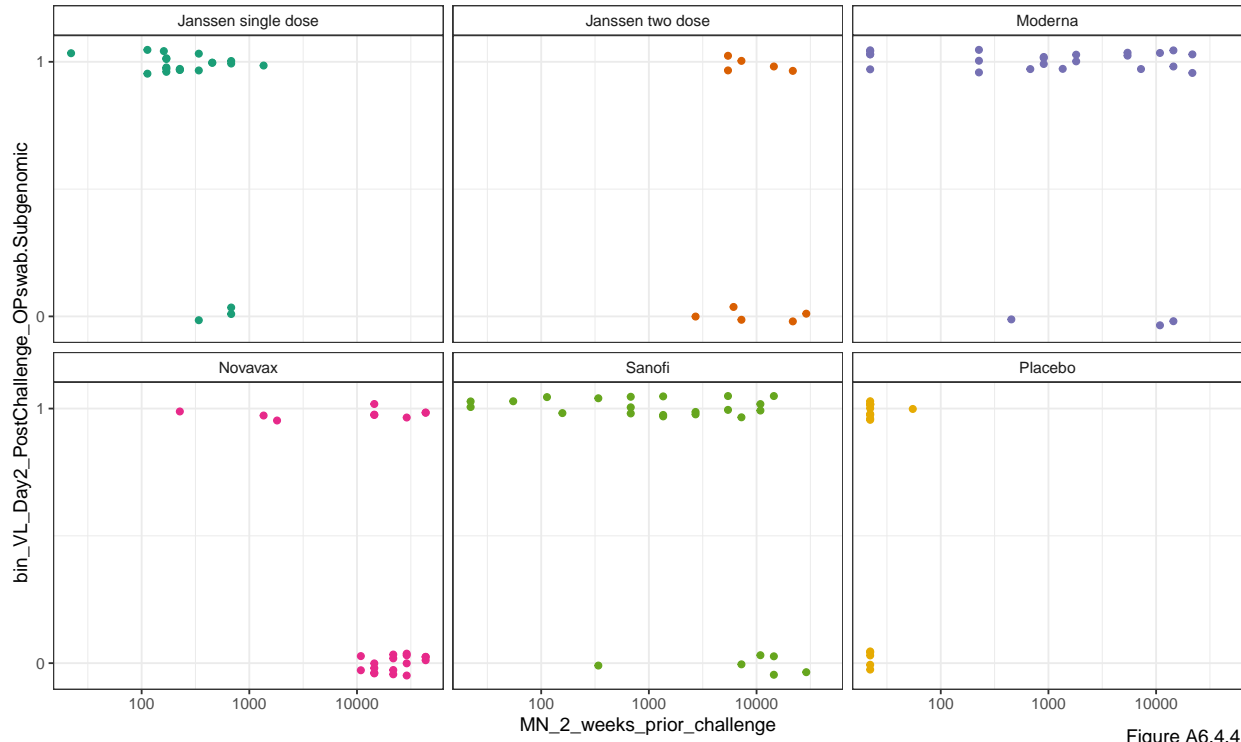

Figure A6.4.4

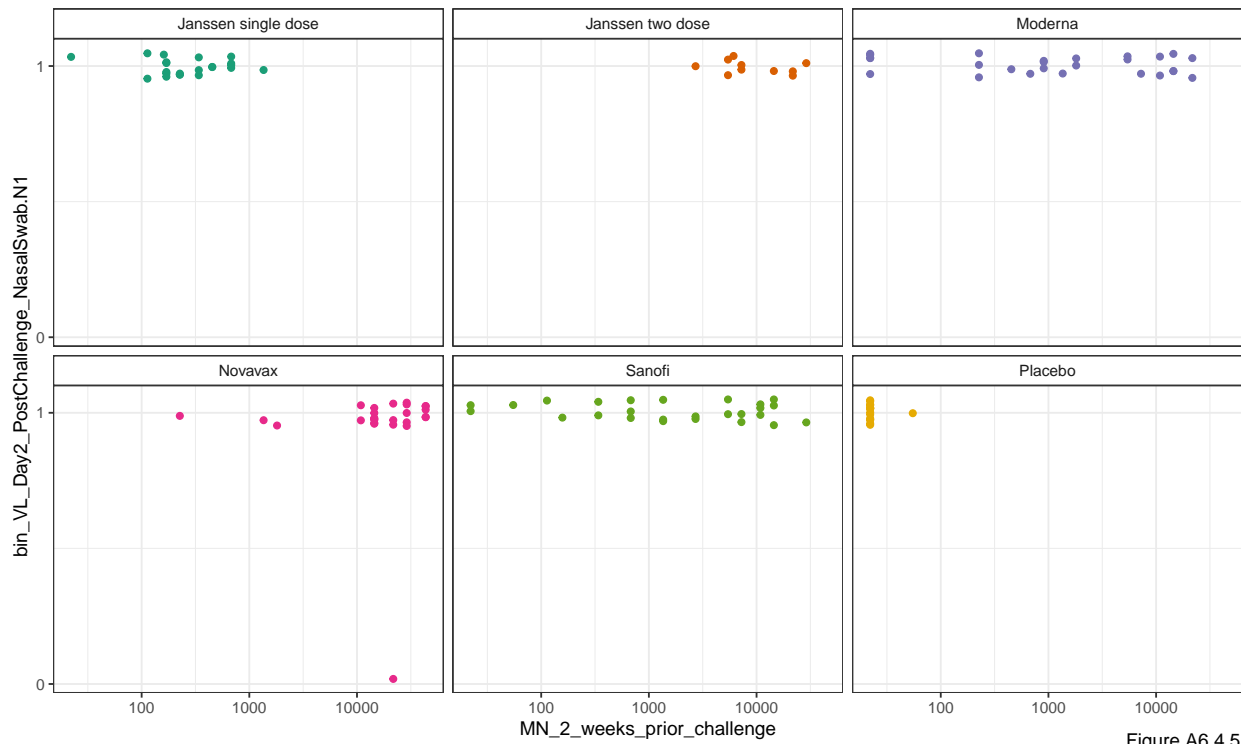

Figure A6.4.5

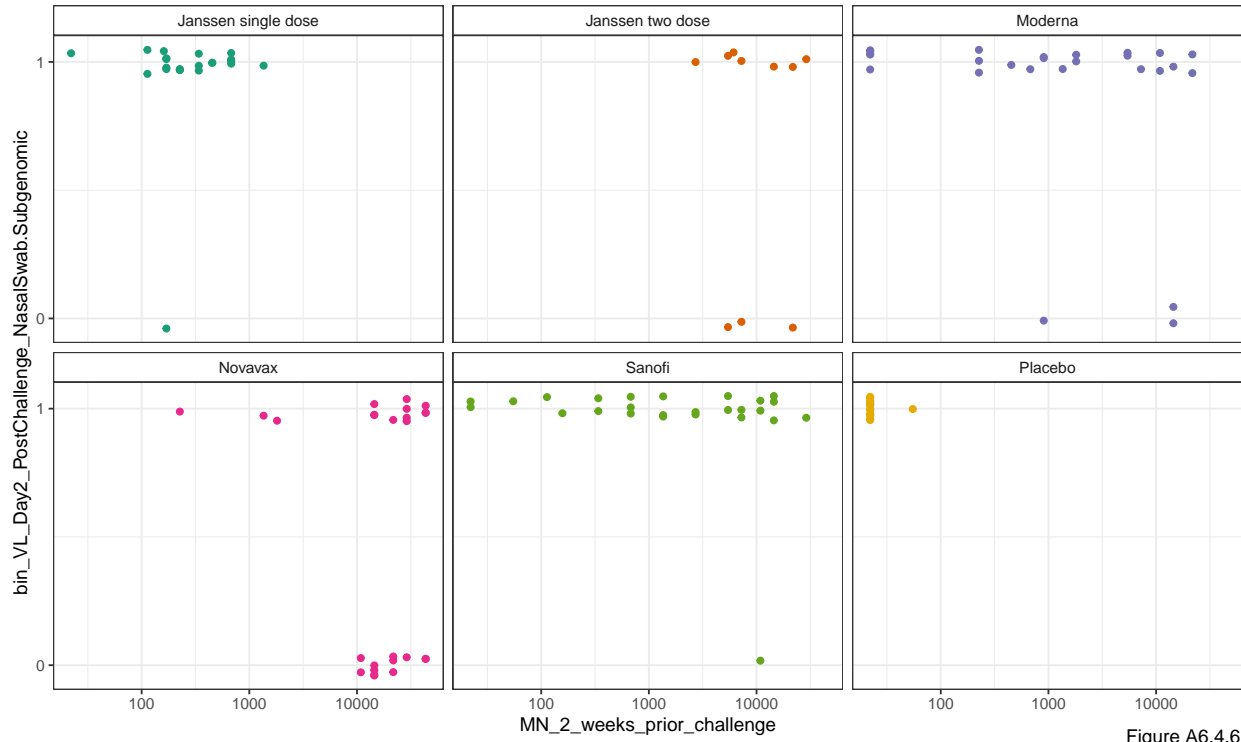

Figure A6.4.6

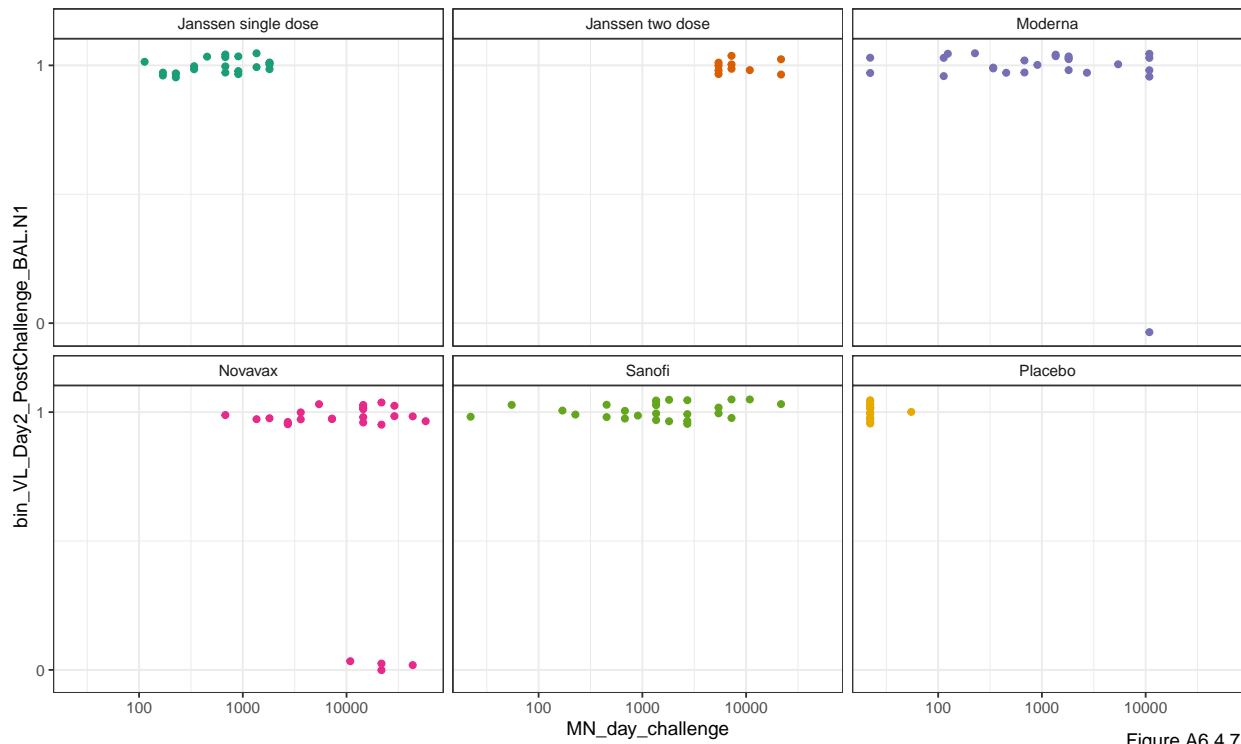

Figure A6.4.7

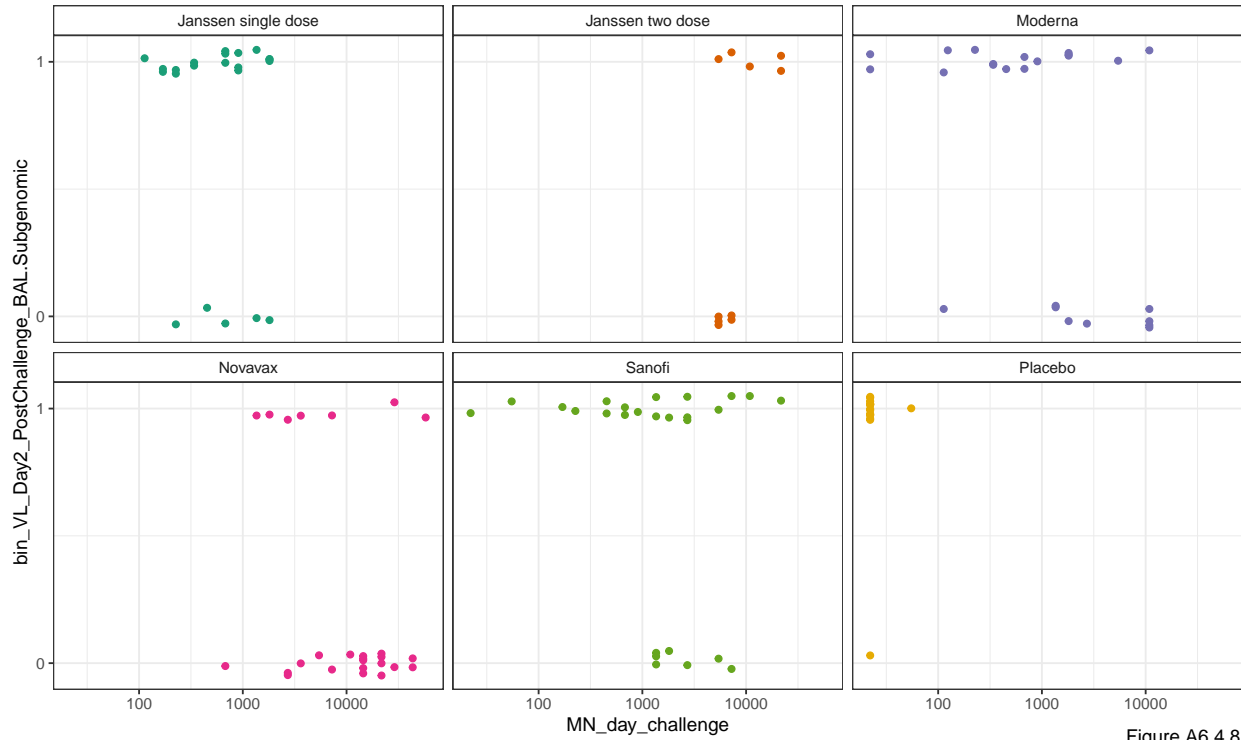

Figure A6.4.8

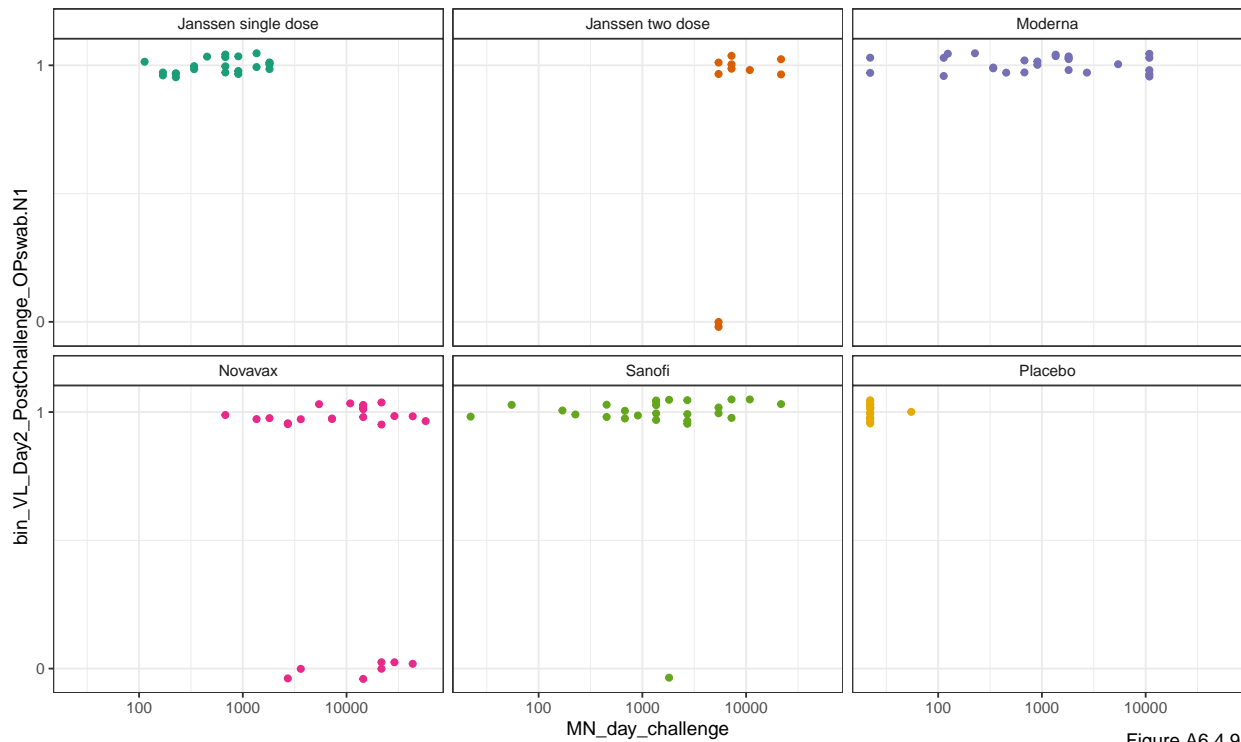

Figure A6.4.9

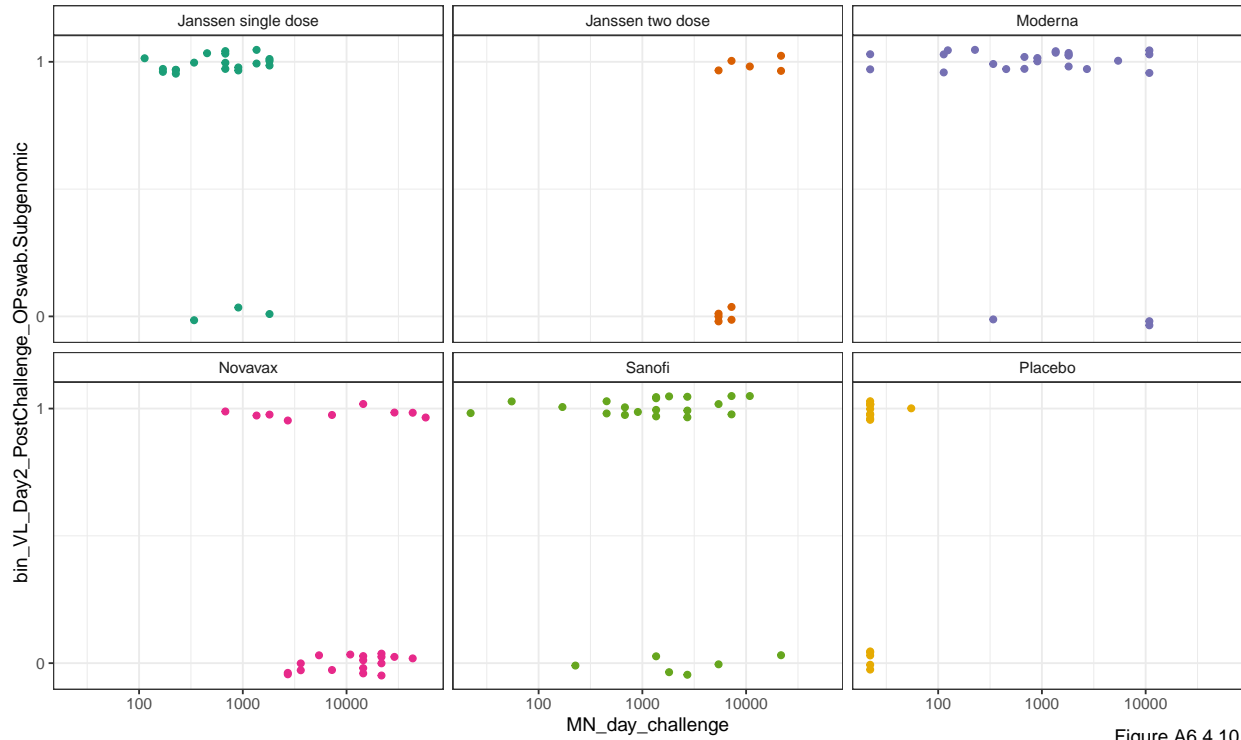

Figure A6.4.10

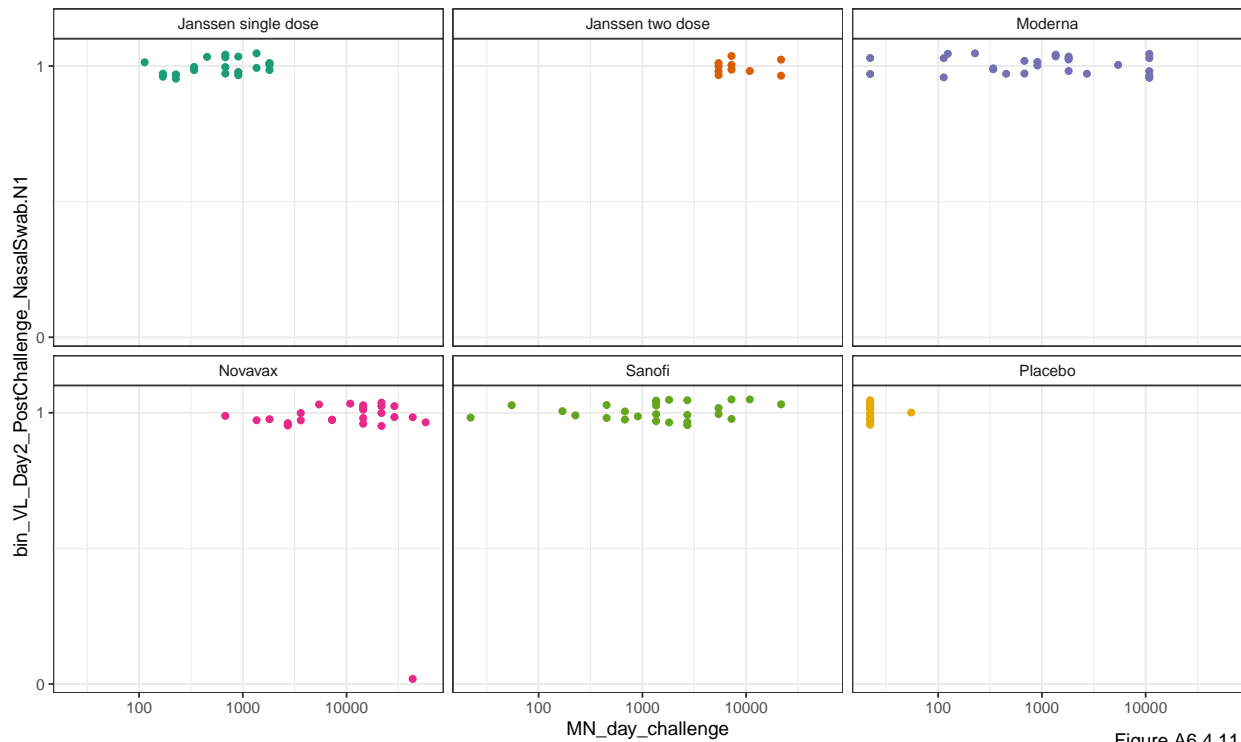

Figure A6.4.11

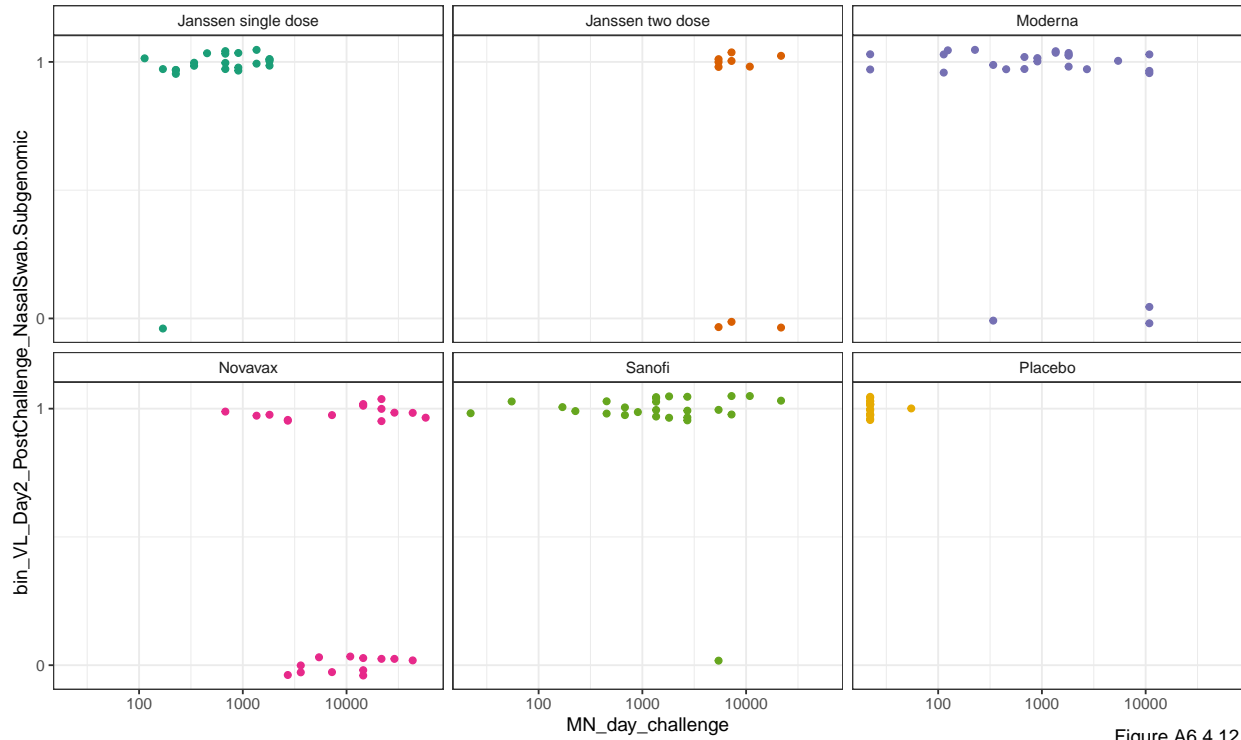

Figure A6.4.12

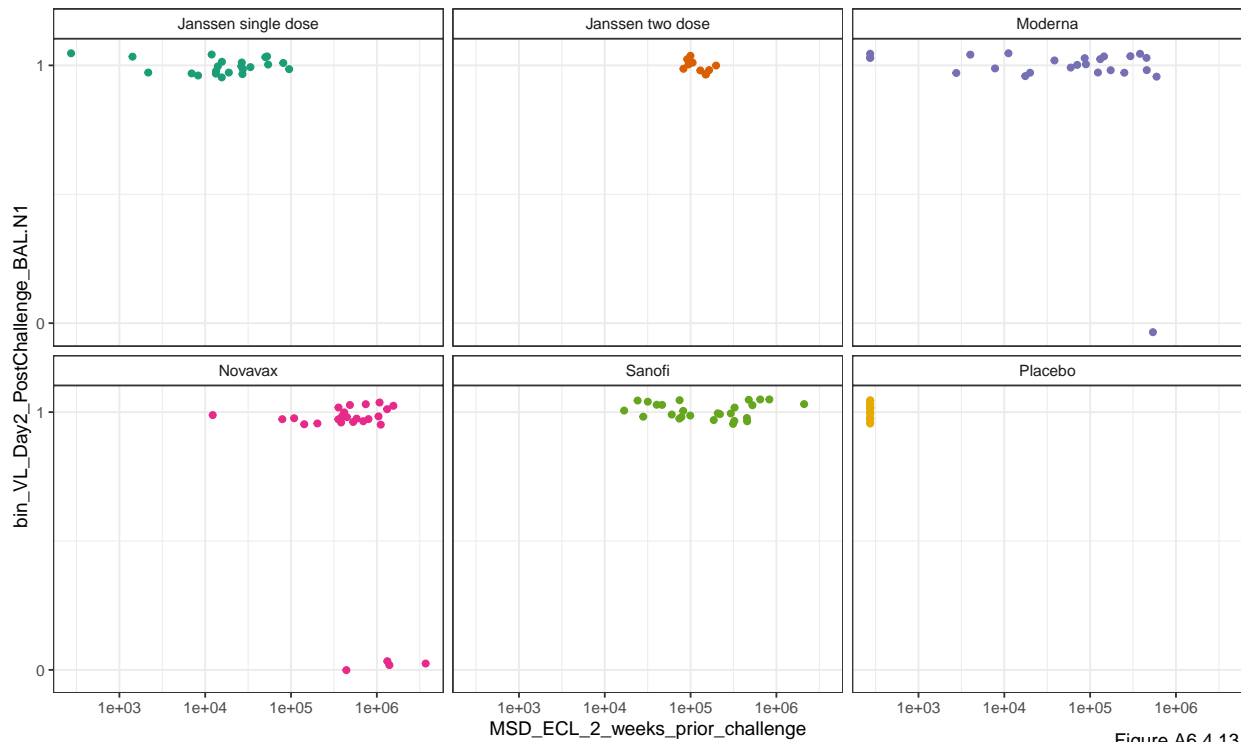

Figure A6.4.13

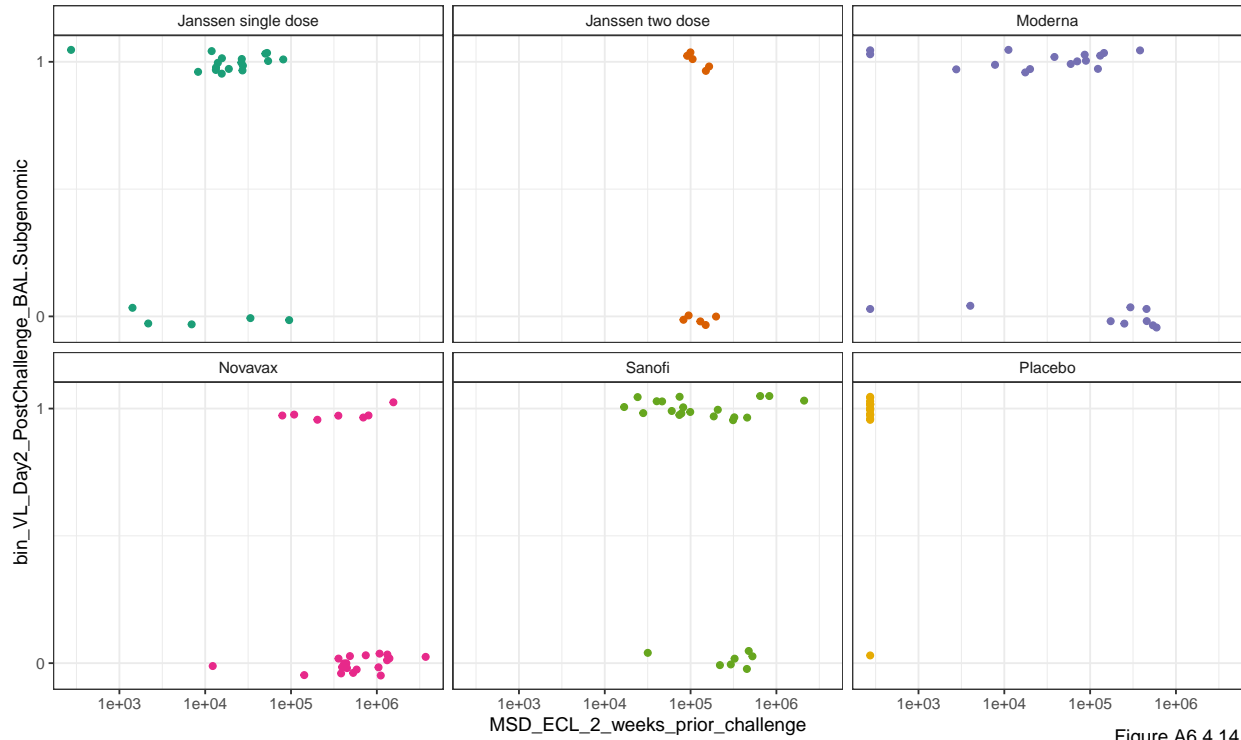

Figure A6.4.14

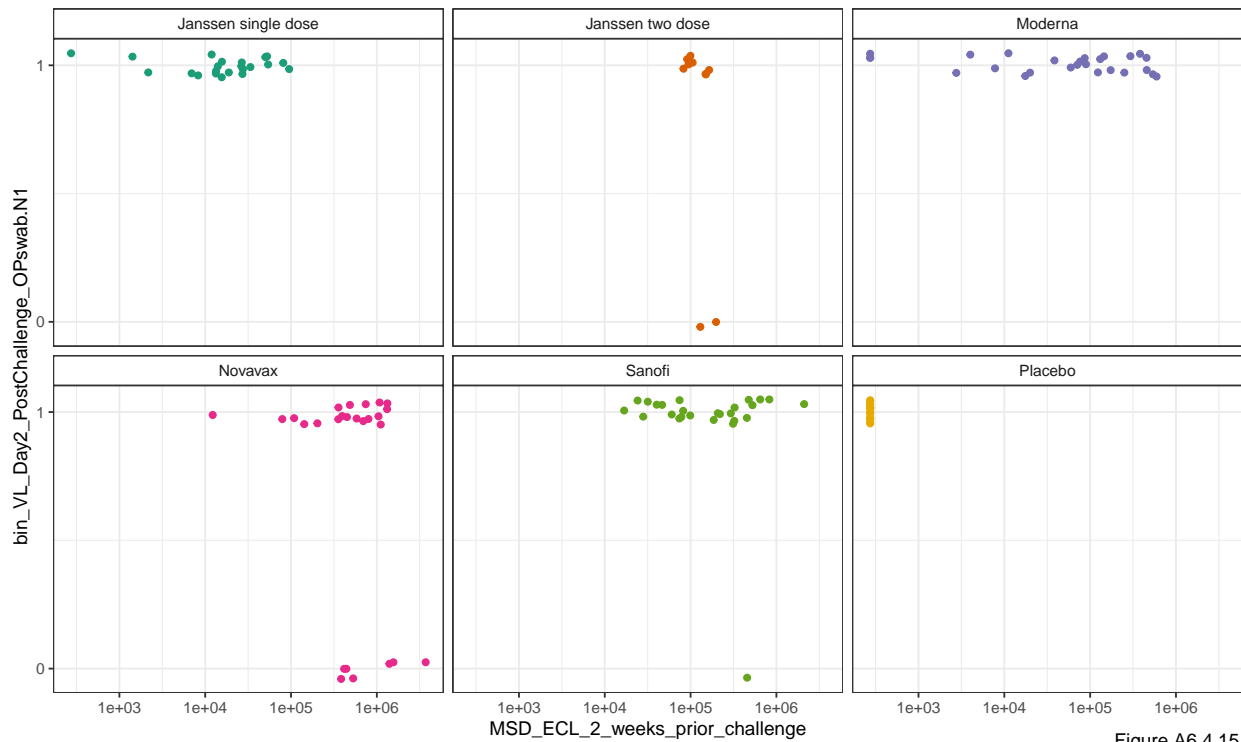

Figure A6.4.15

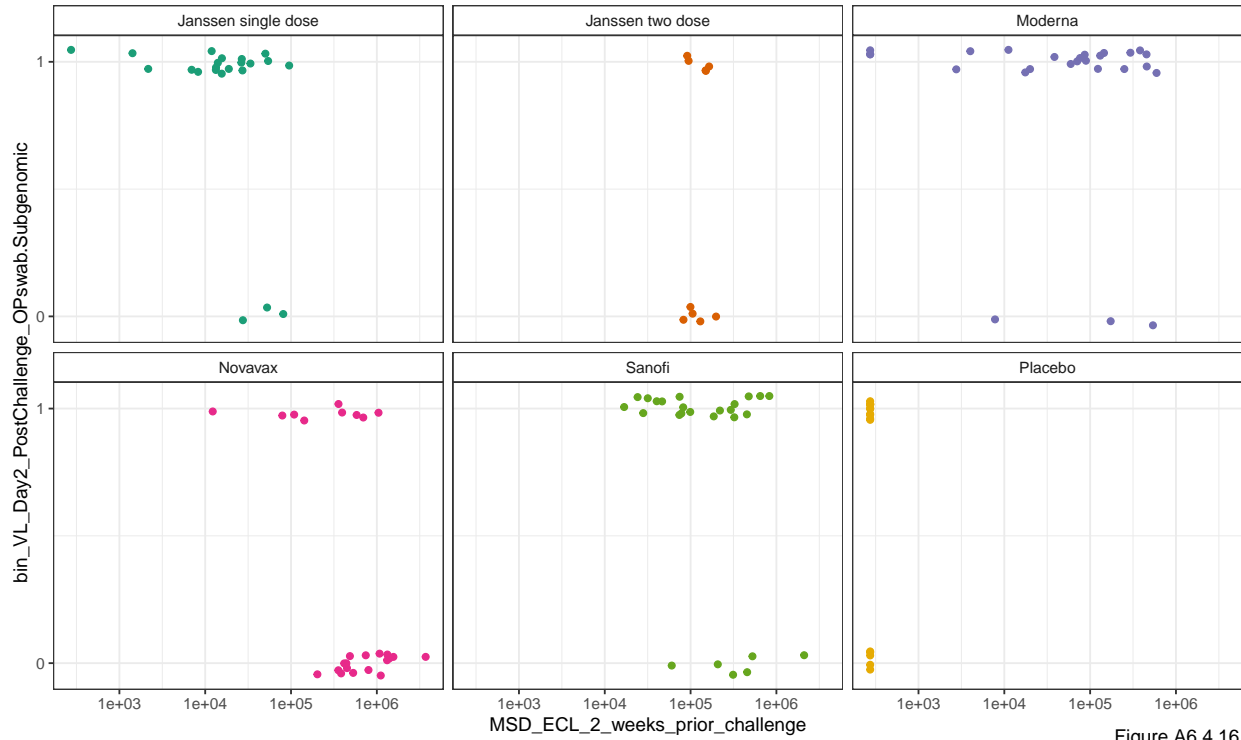

Figure A6.4.16

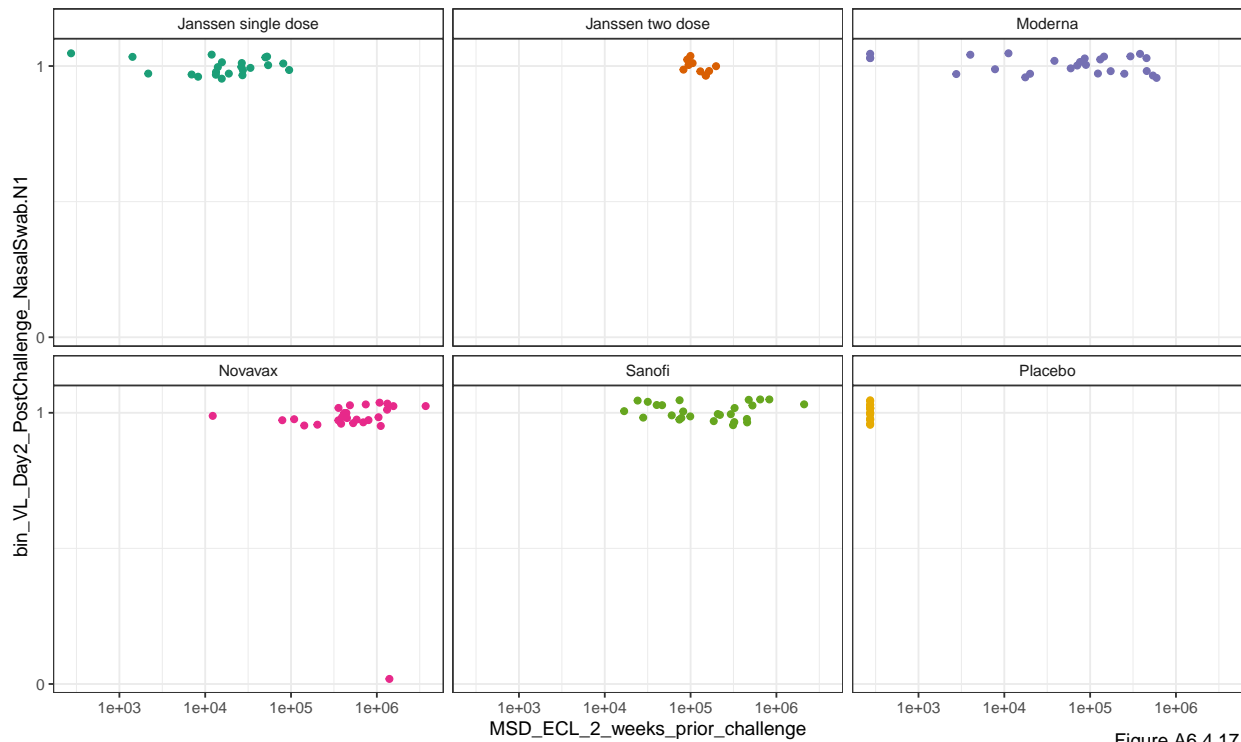

Figure A6.4.17

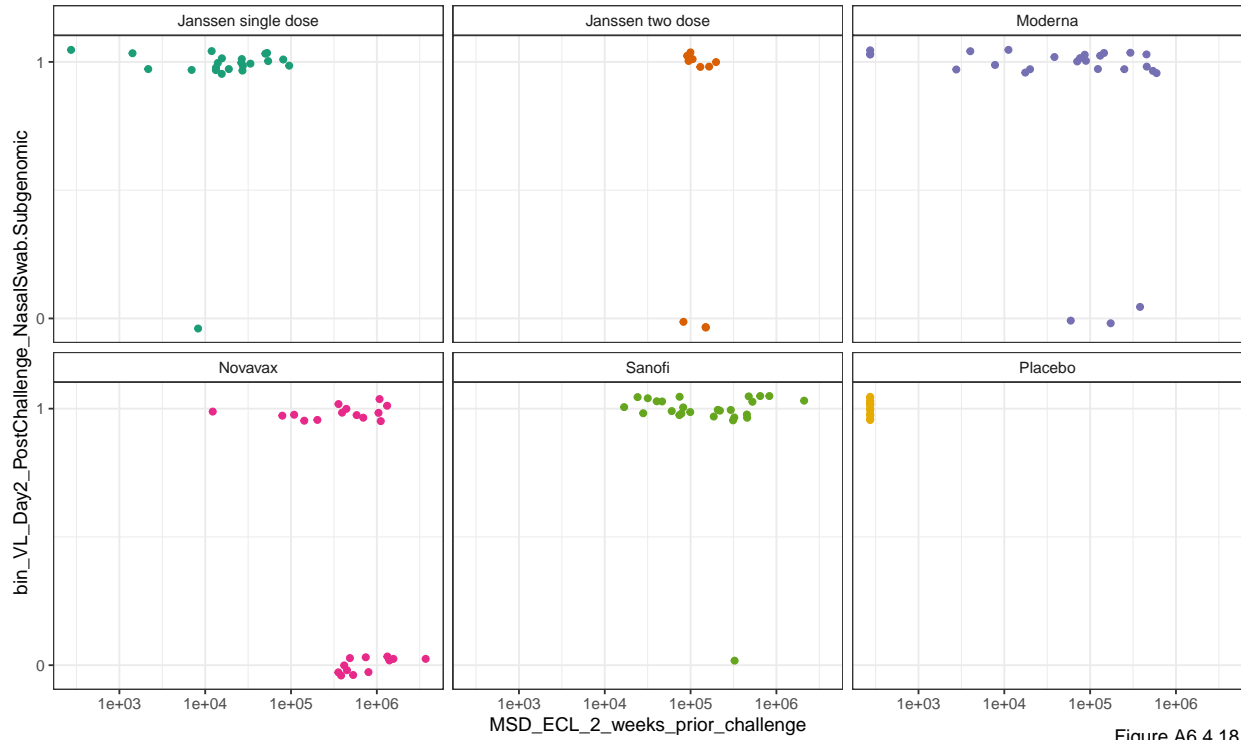

Figure A6.4.18

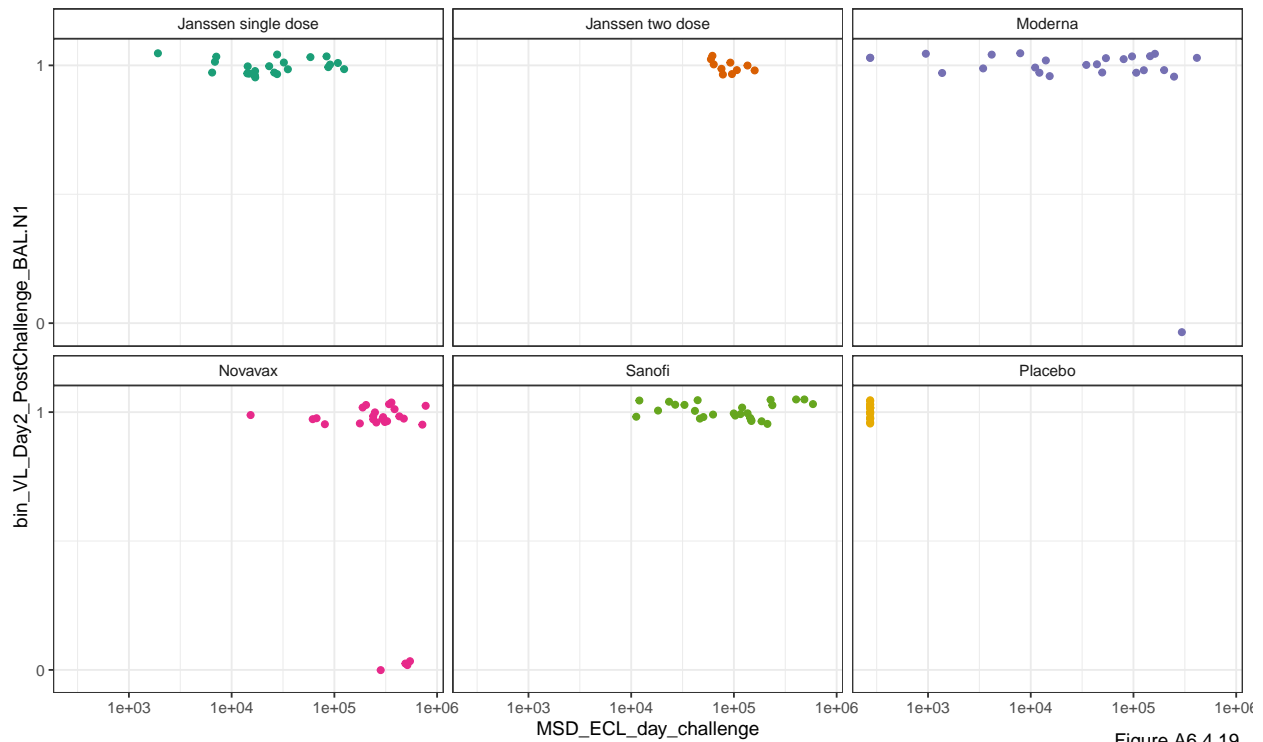

Figure A6.4.19

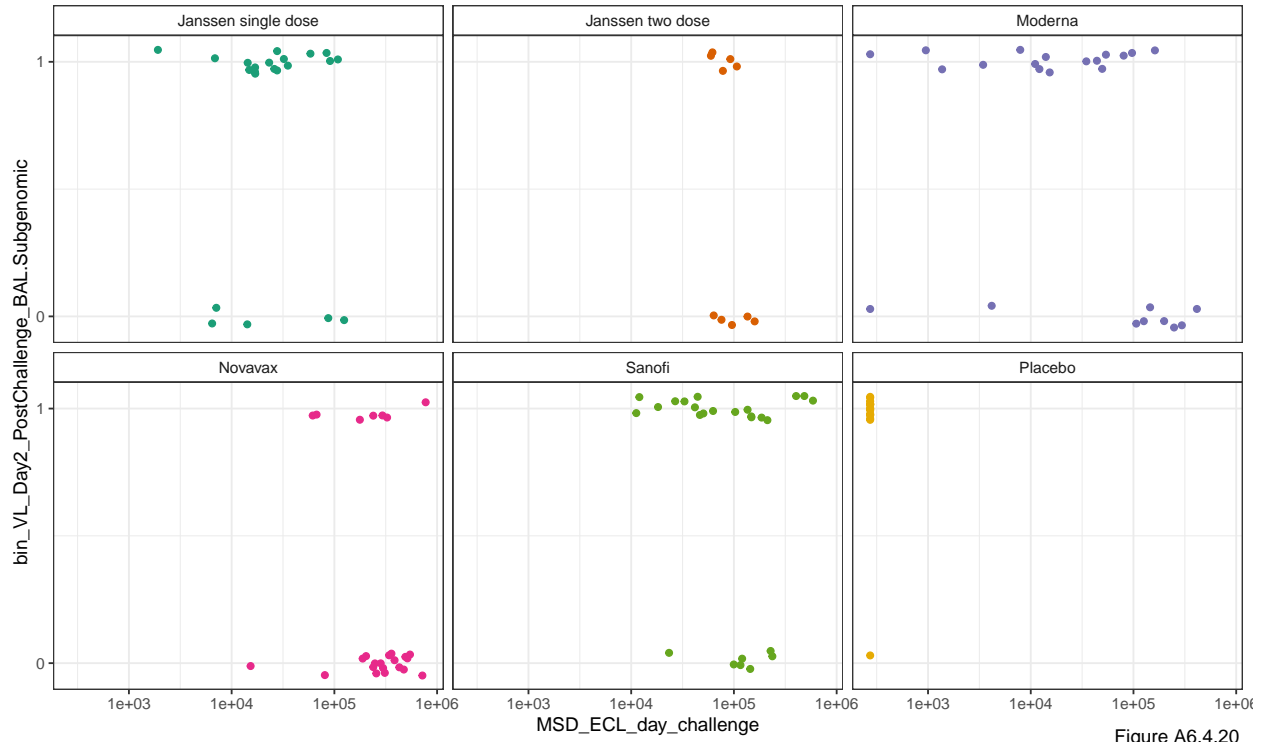

Figure A6.4.20

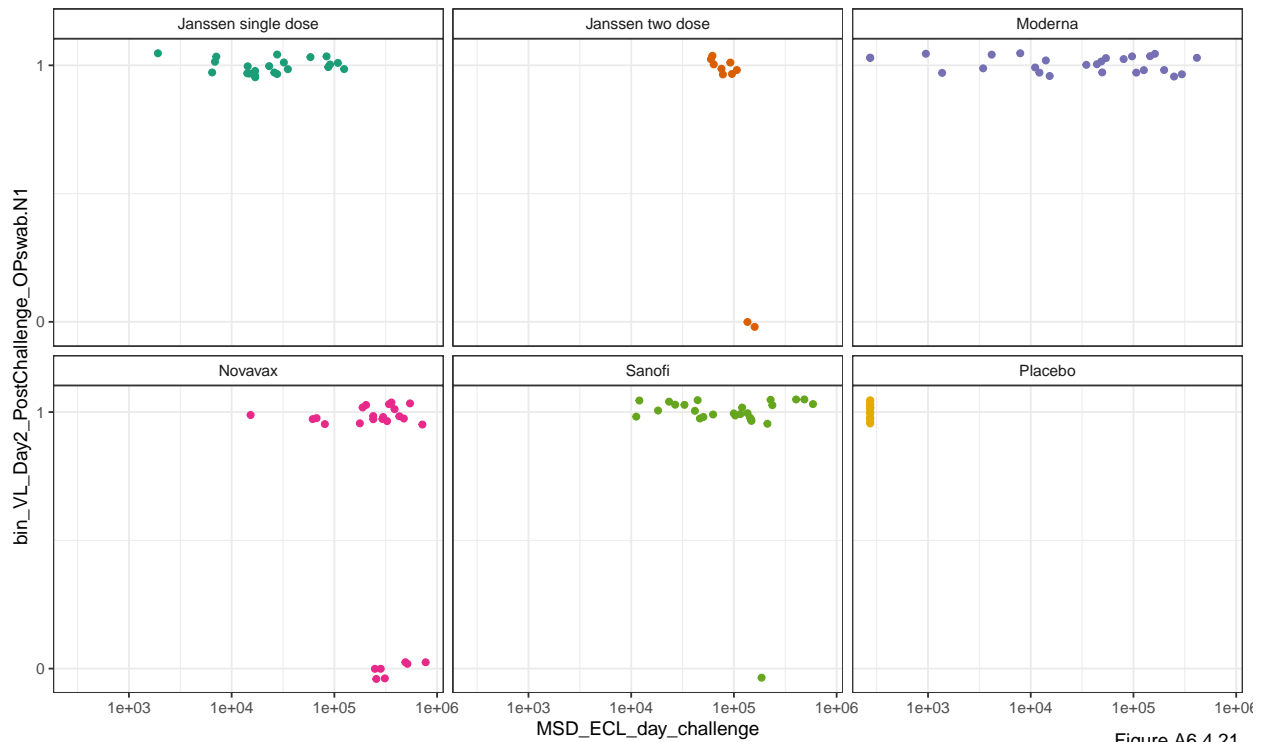

Figure A6.4.21

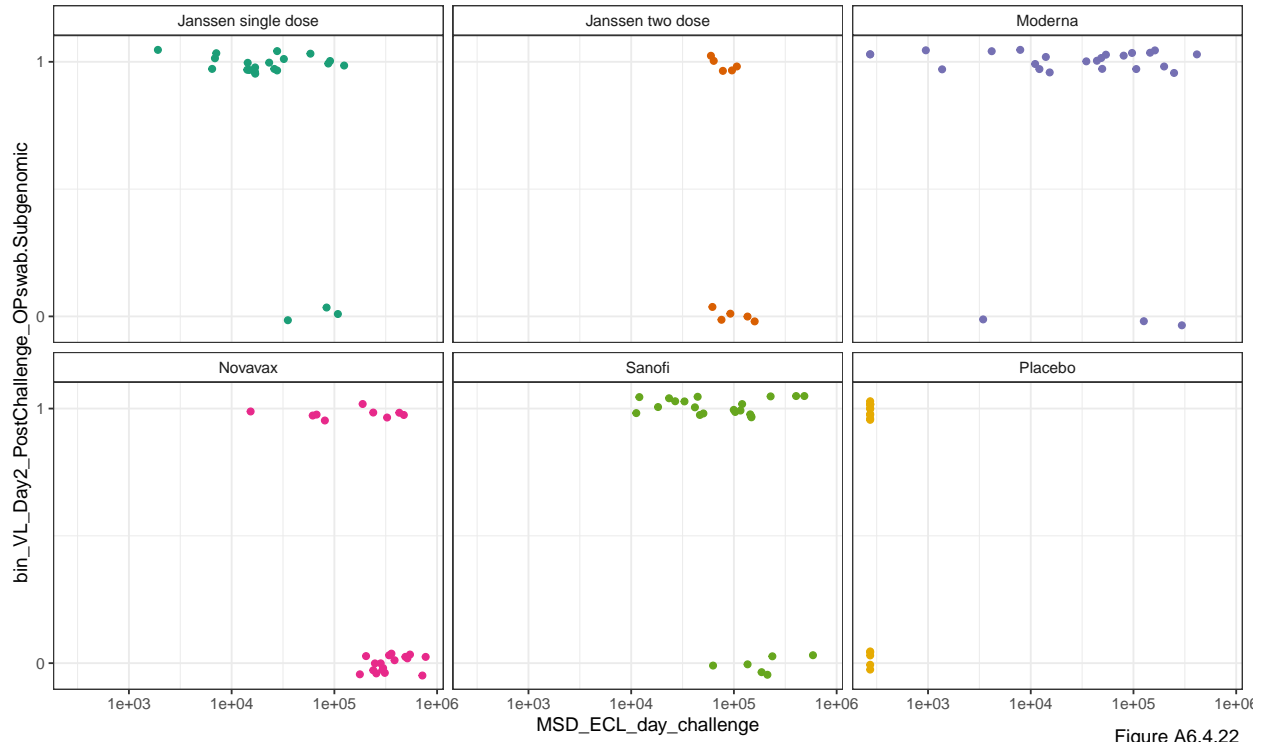

Figure A6.4.22

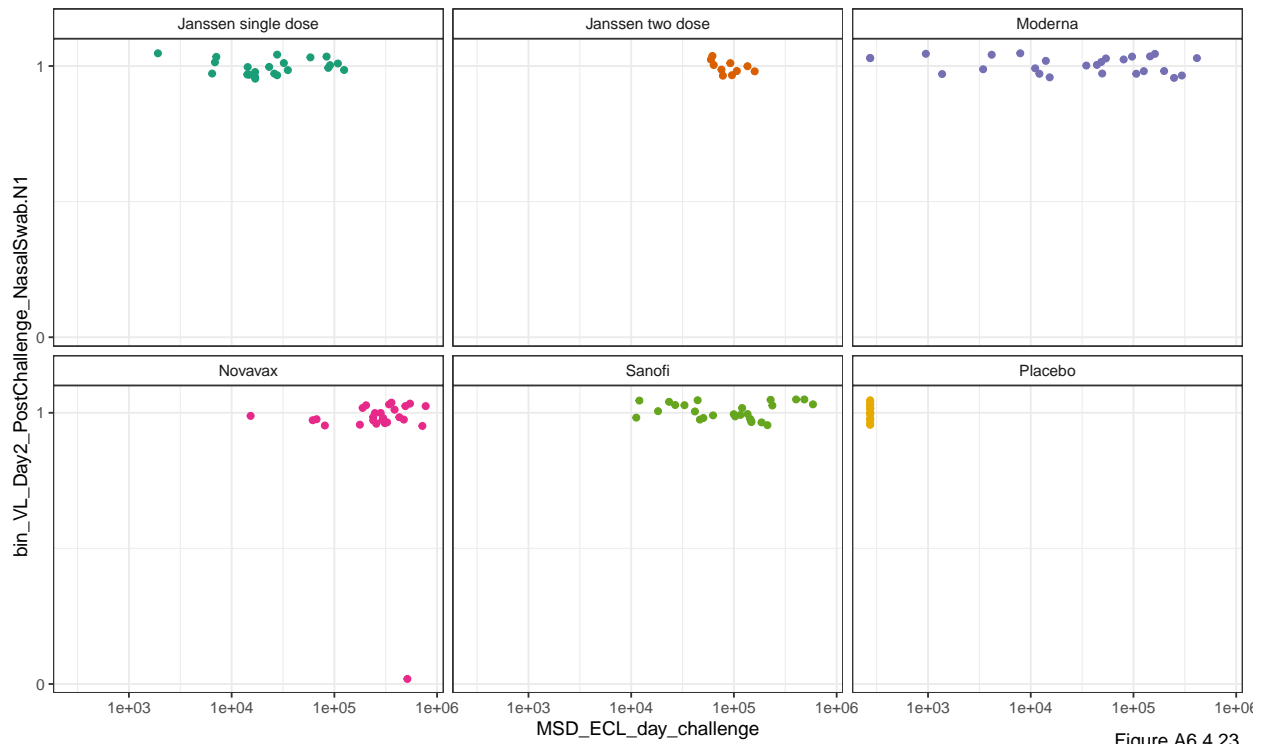

Figure A6.4.23

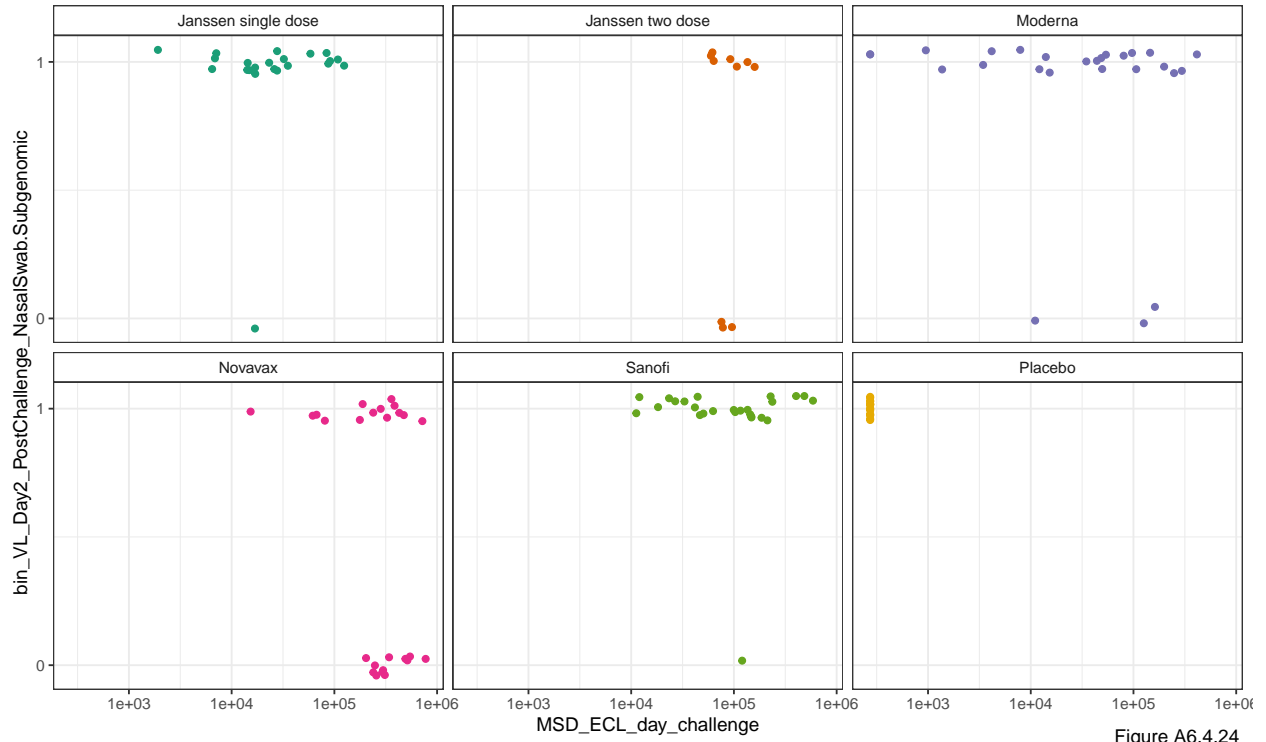

Figure A6.4.24

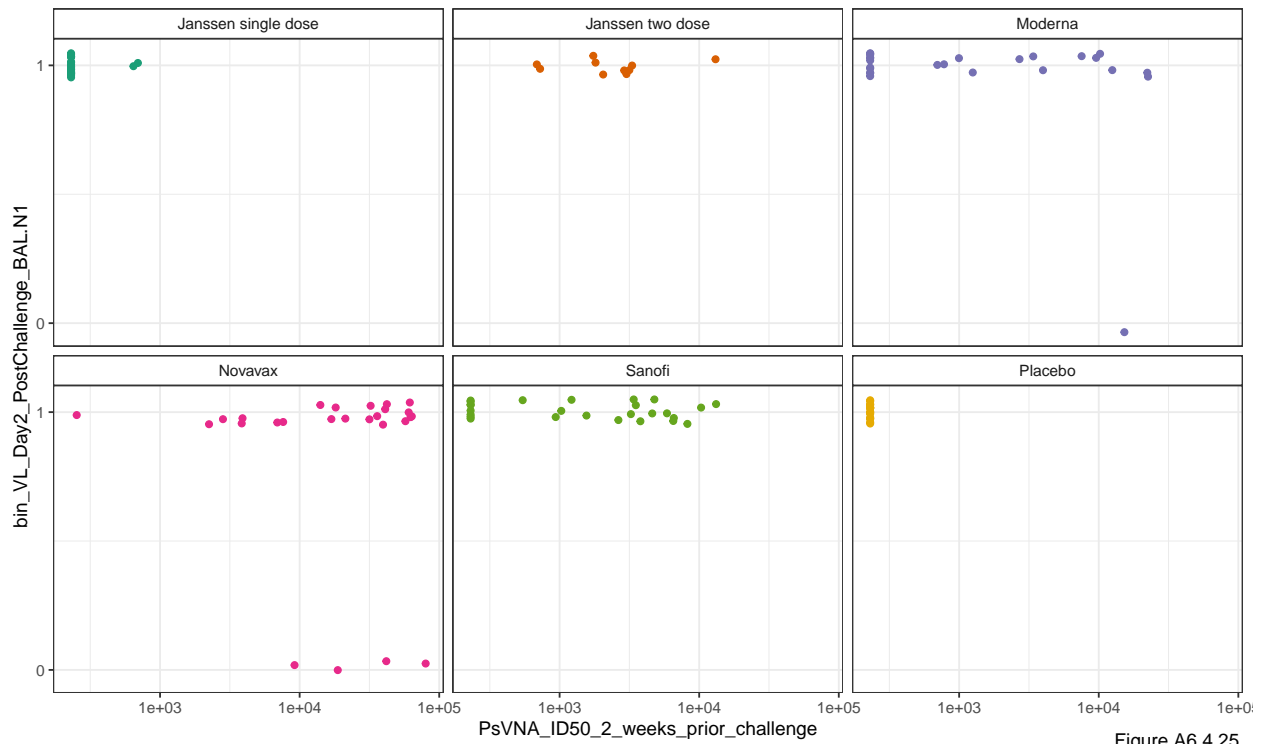

Figure A6.4.25

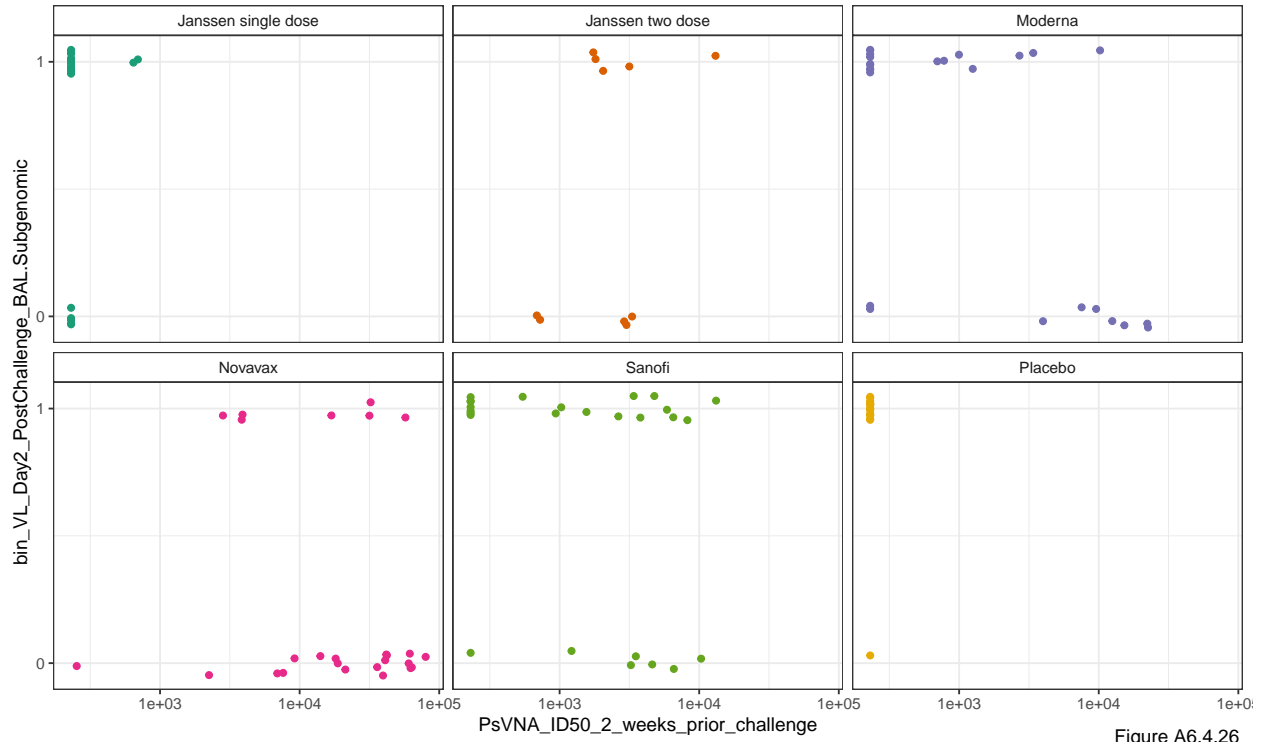

Figure A6.4.26

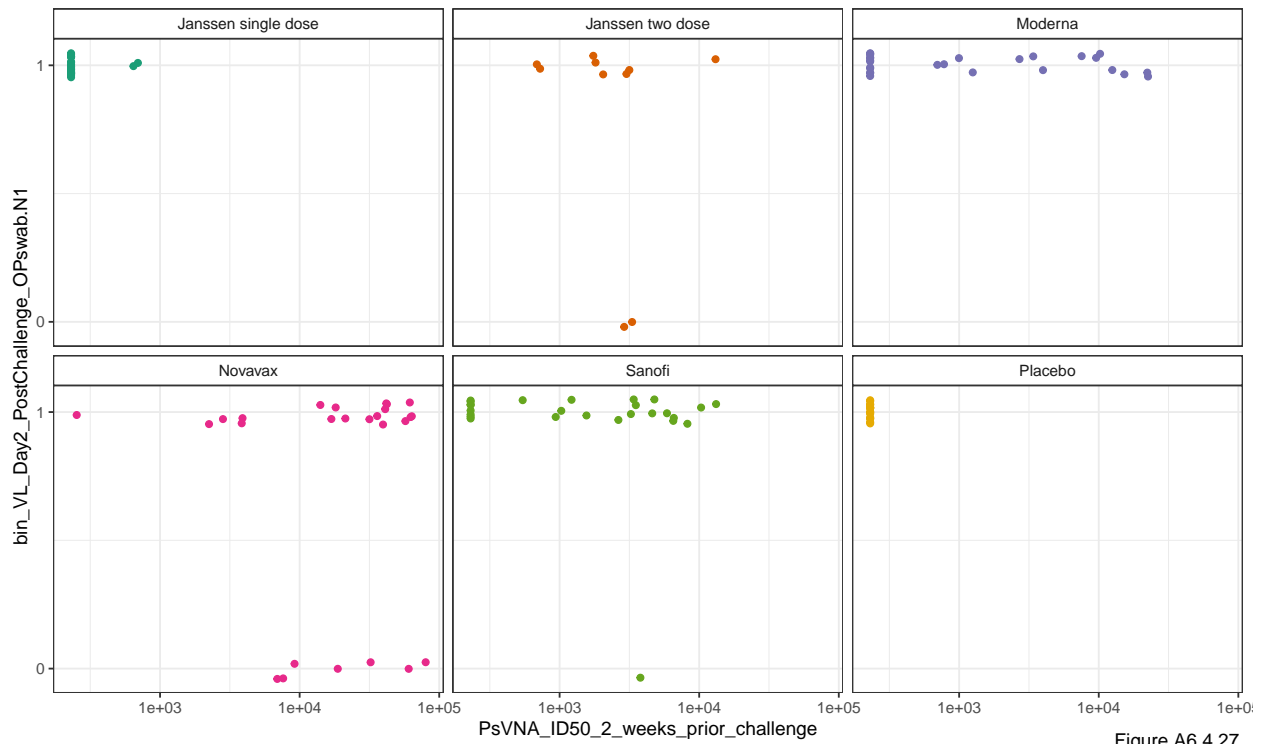

Figure A6.4.27

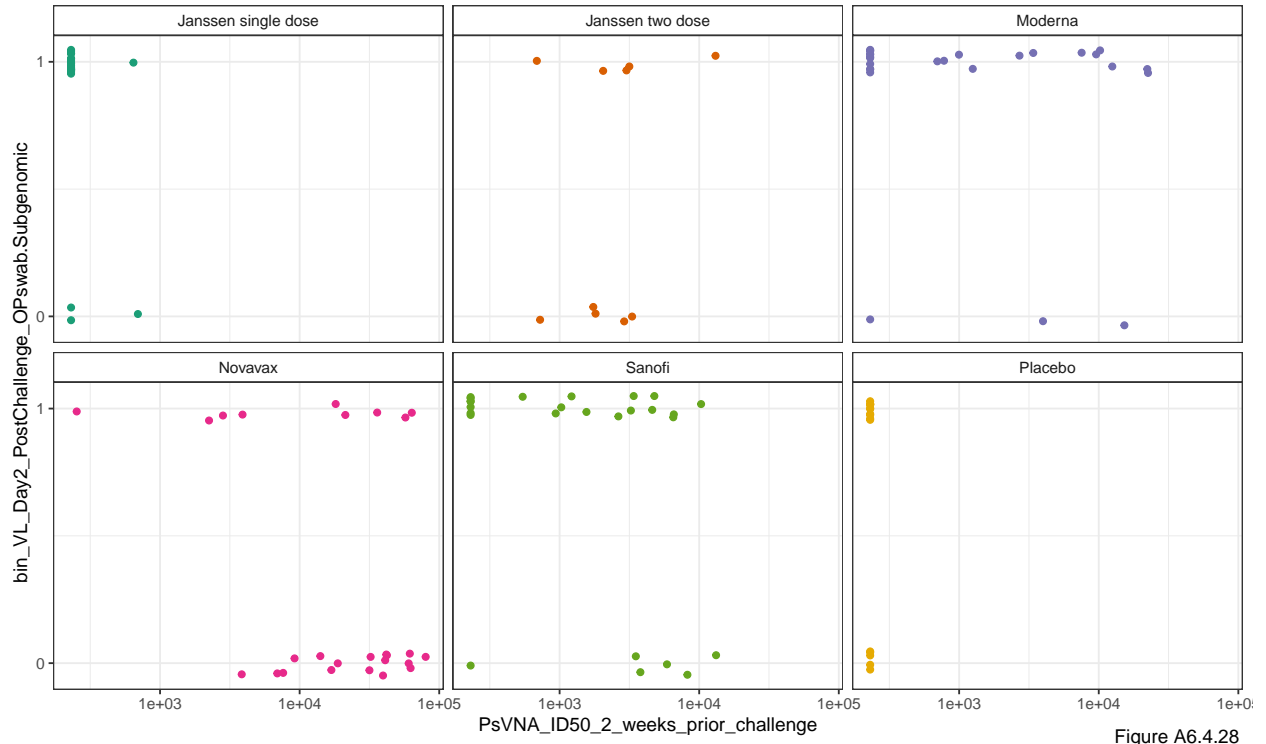

Figure A6.4.28

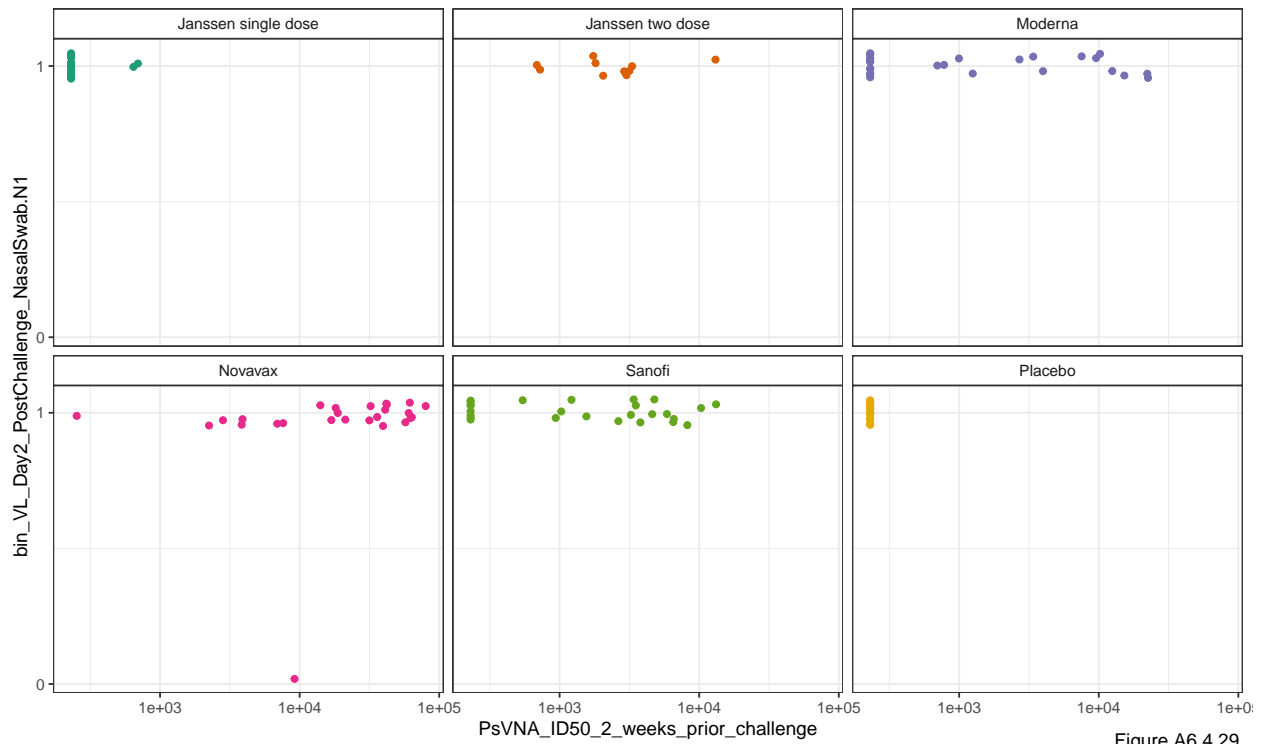

Figure A6.4.29

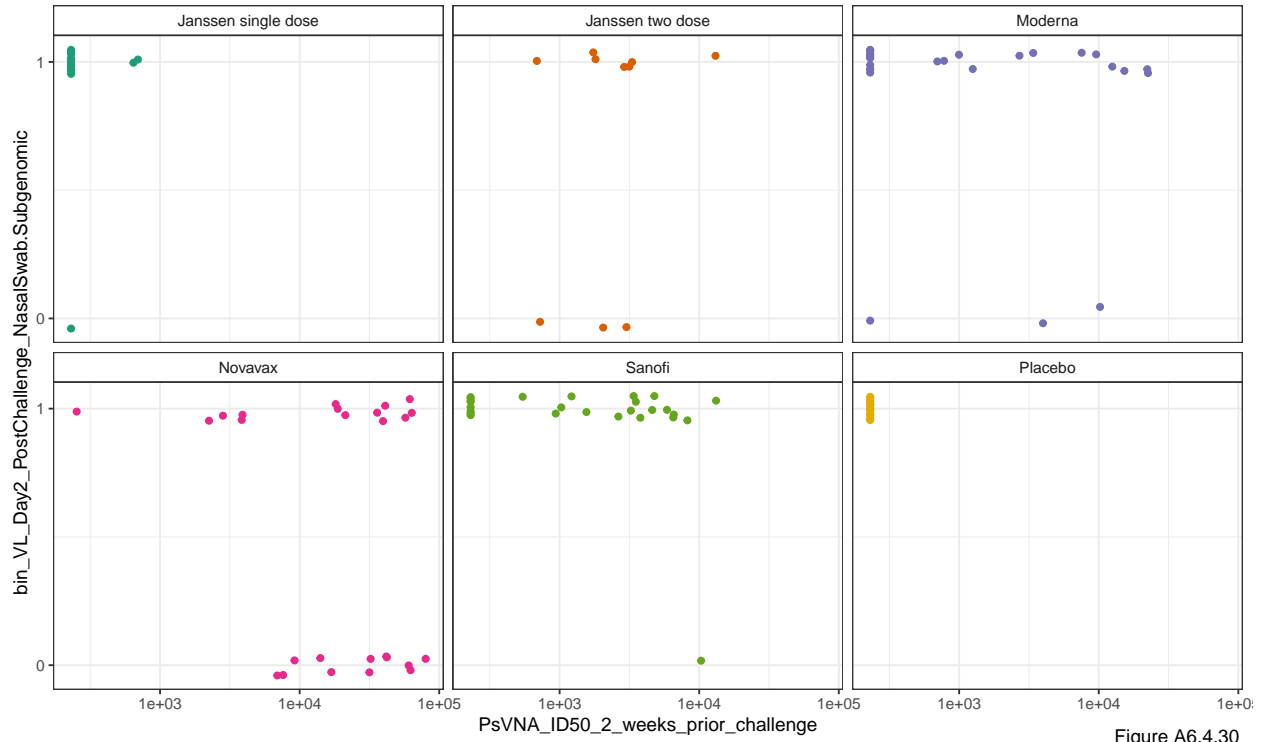

Figure A6.4.30

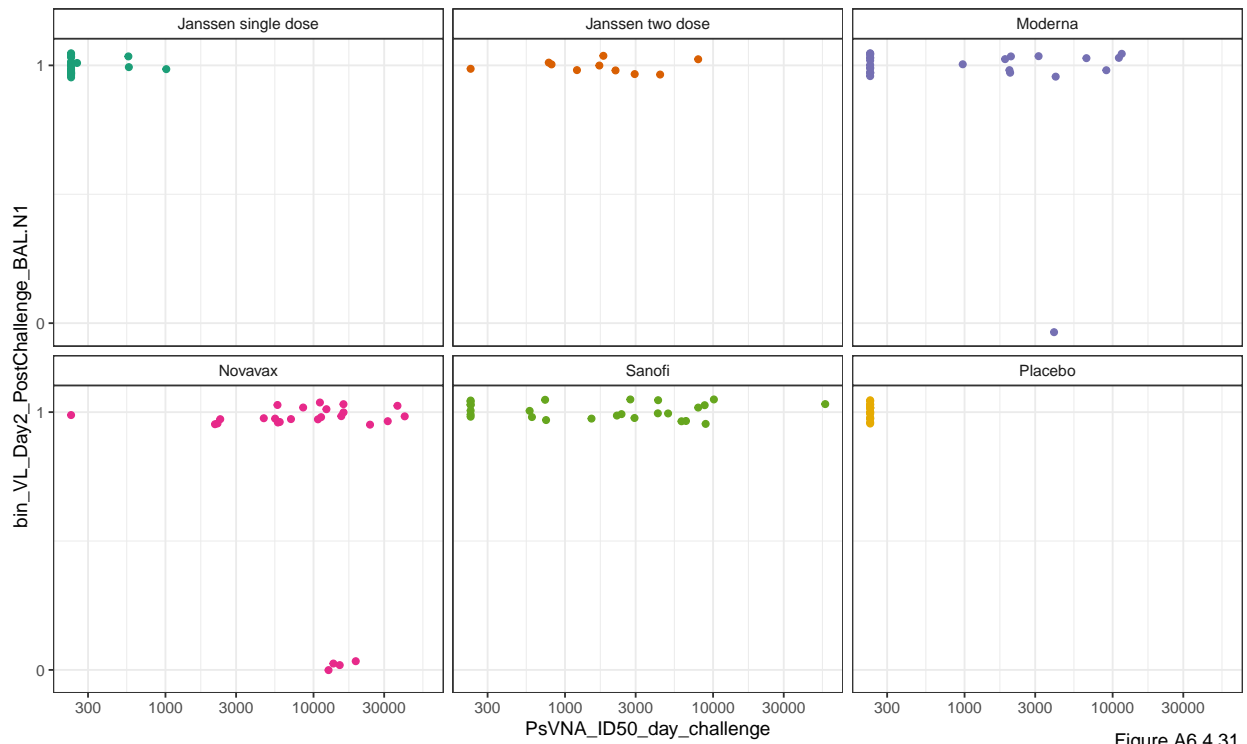

Figure A6.4.31

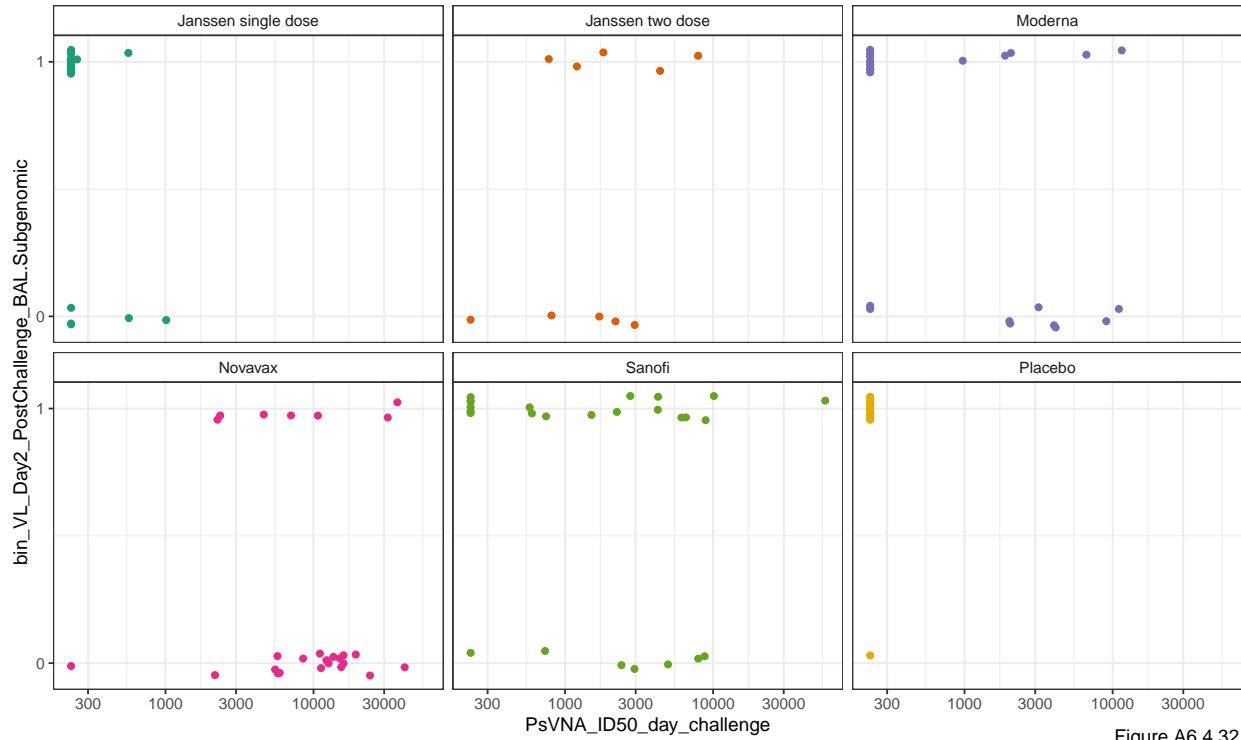

Figure A6.4.32

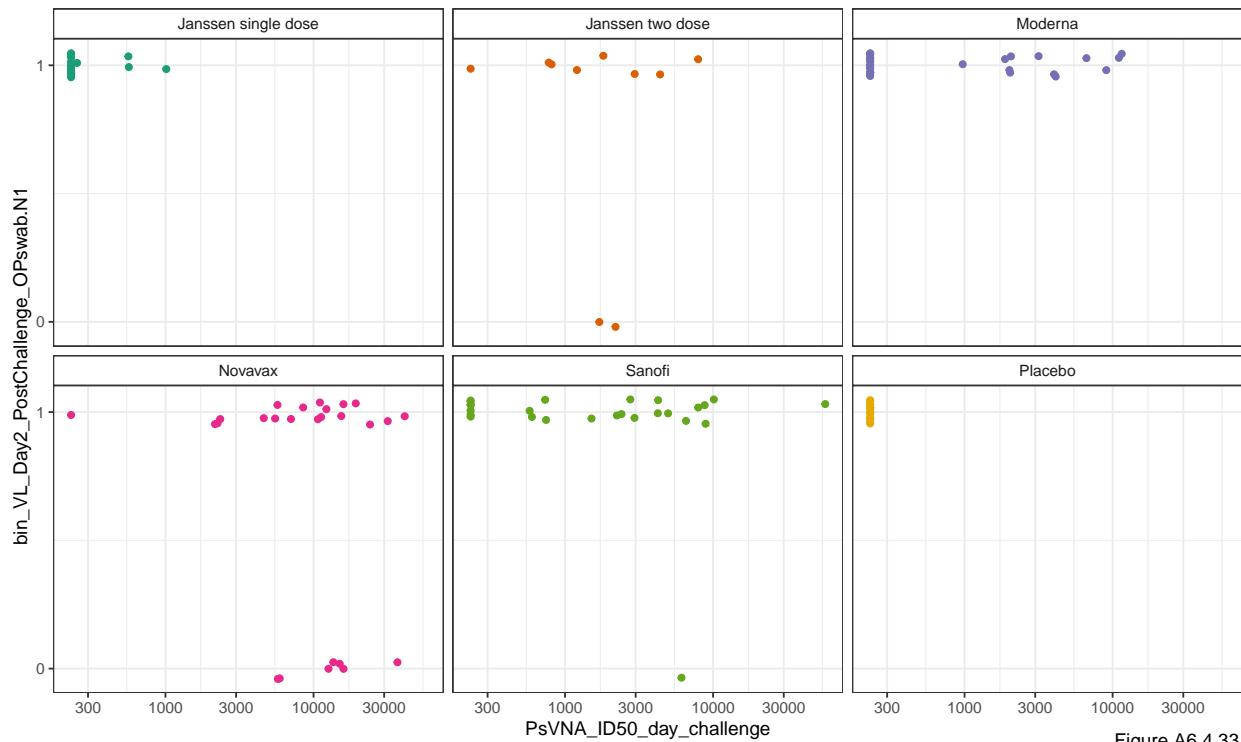

Figure A6.4.33

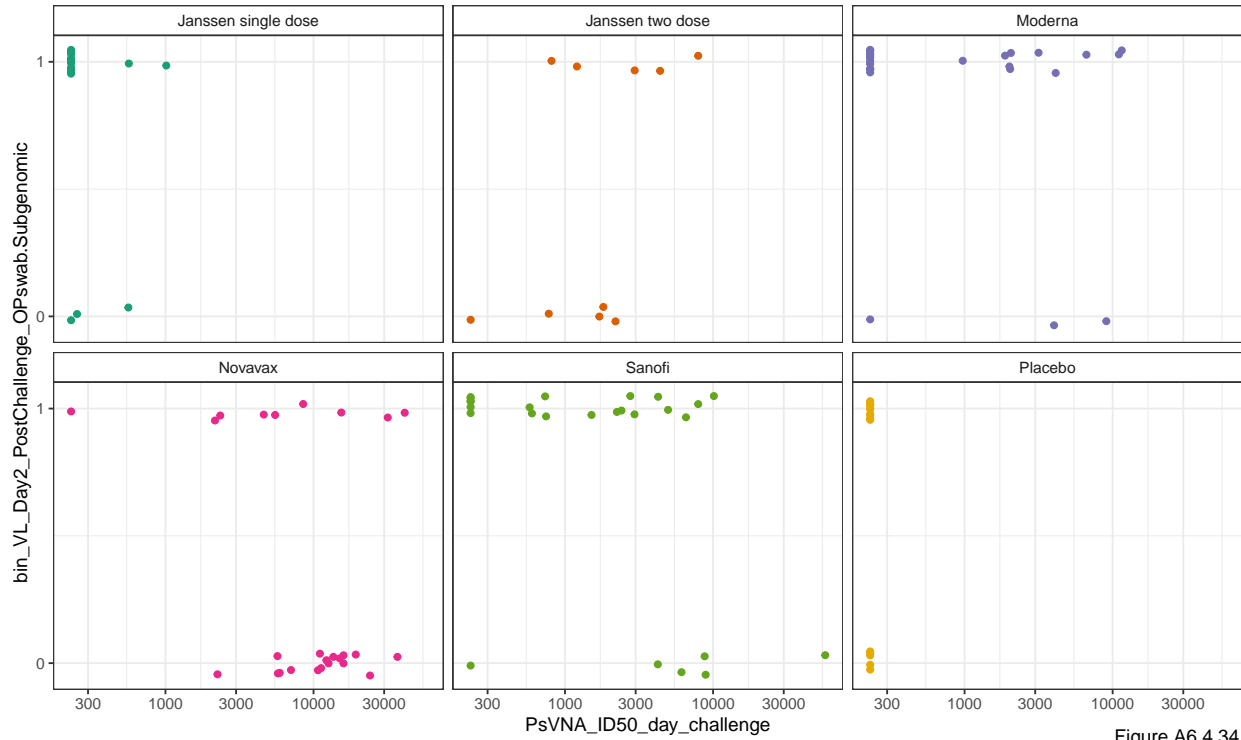

Figure A6.4.34

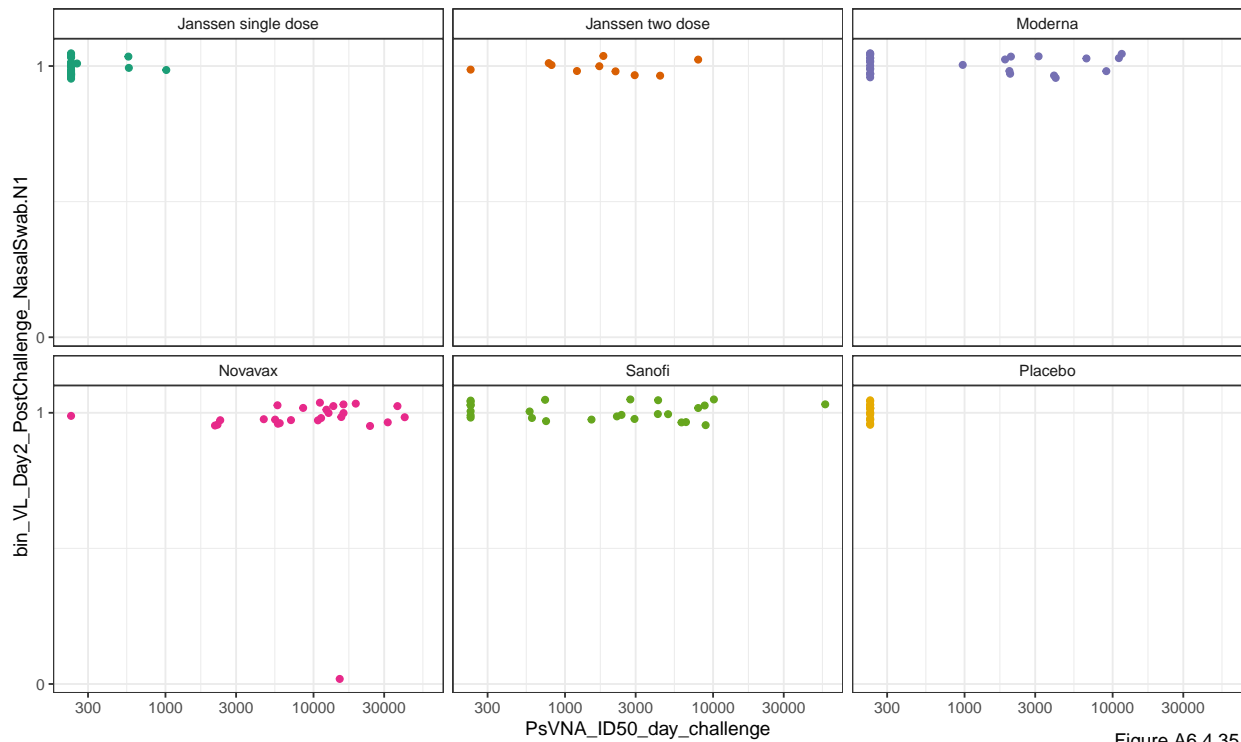

Figure A6.4.35

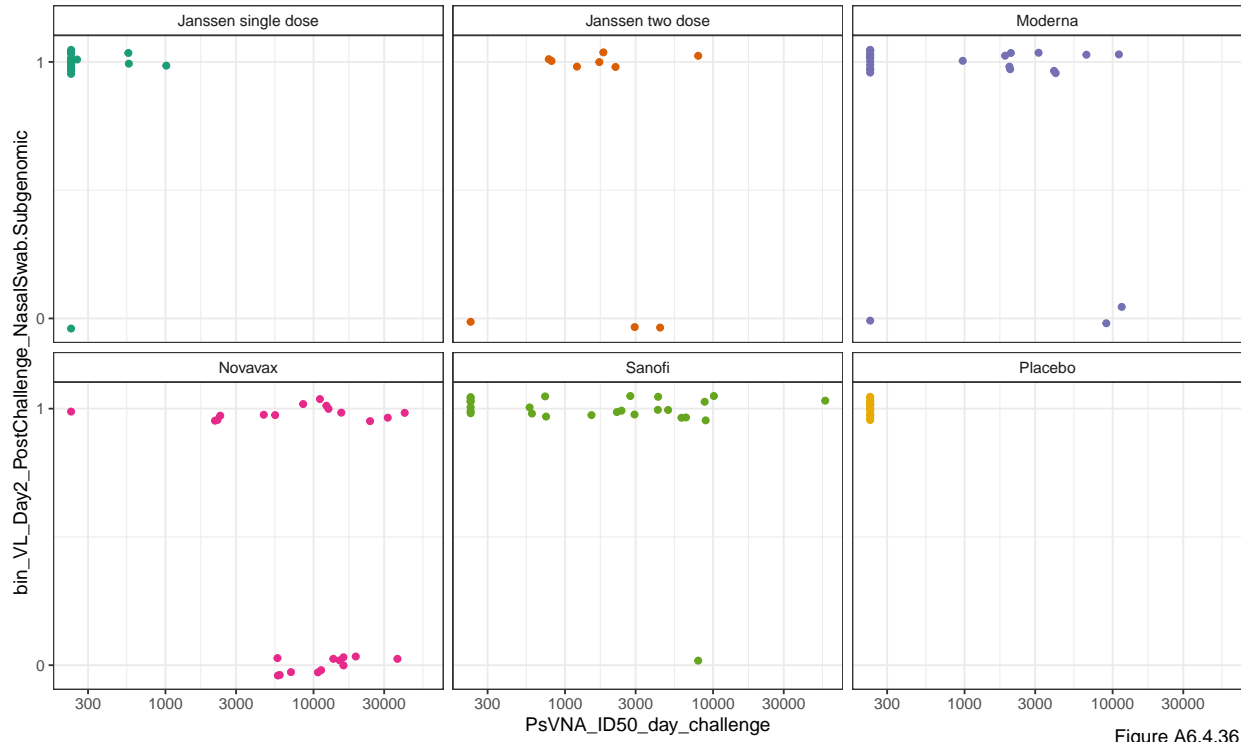

Figure A6.4.36

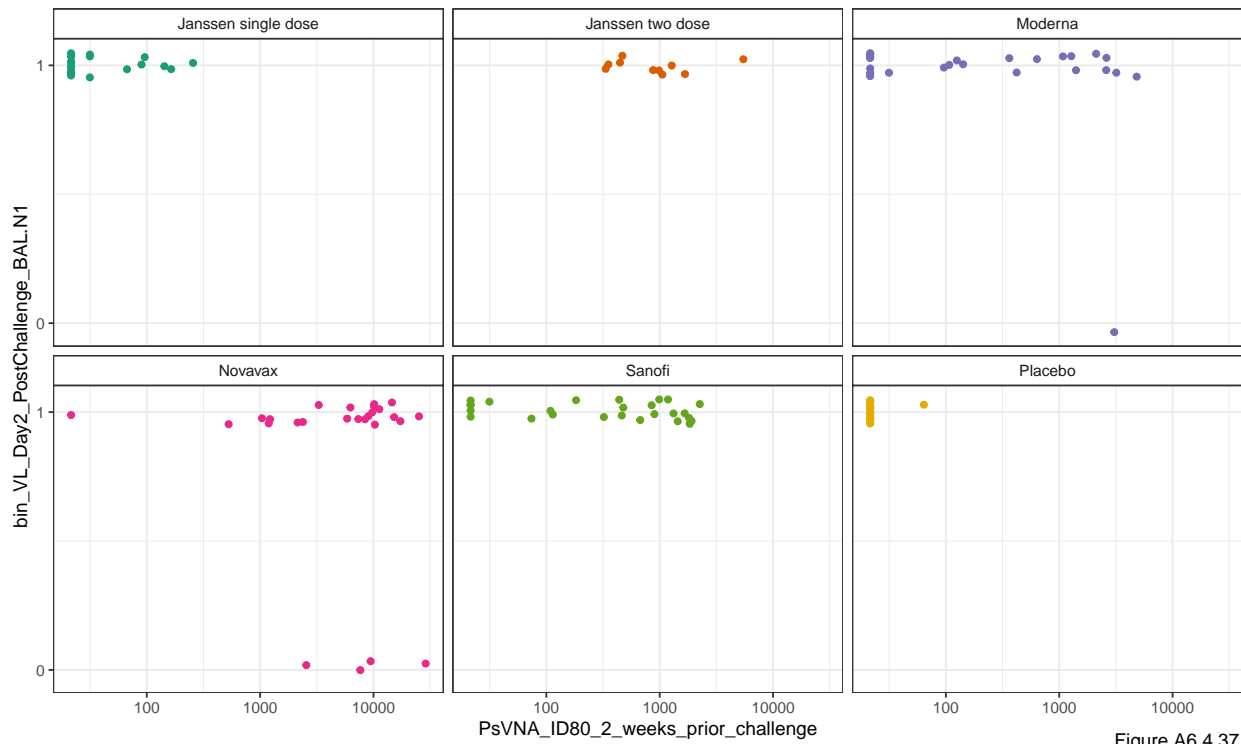

Figure A6.4.37

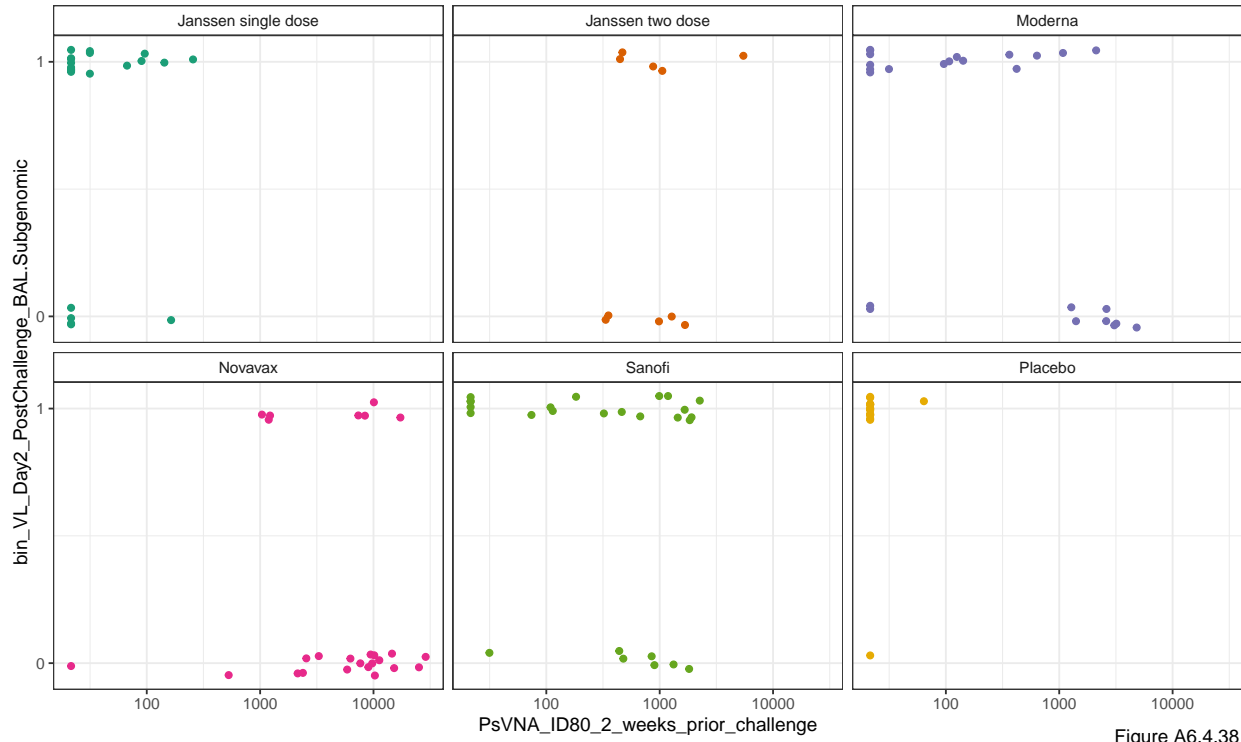

Figure A6.4.38

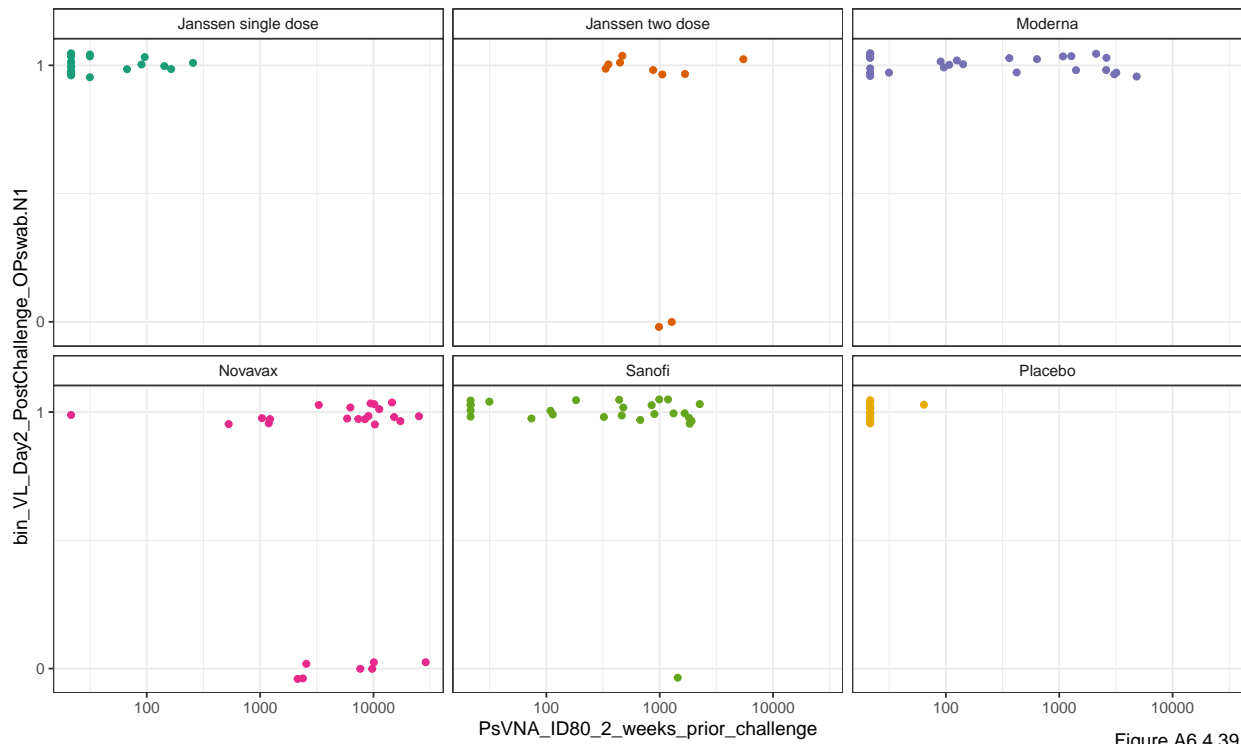

Figure A6.4.39

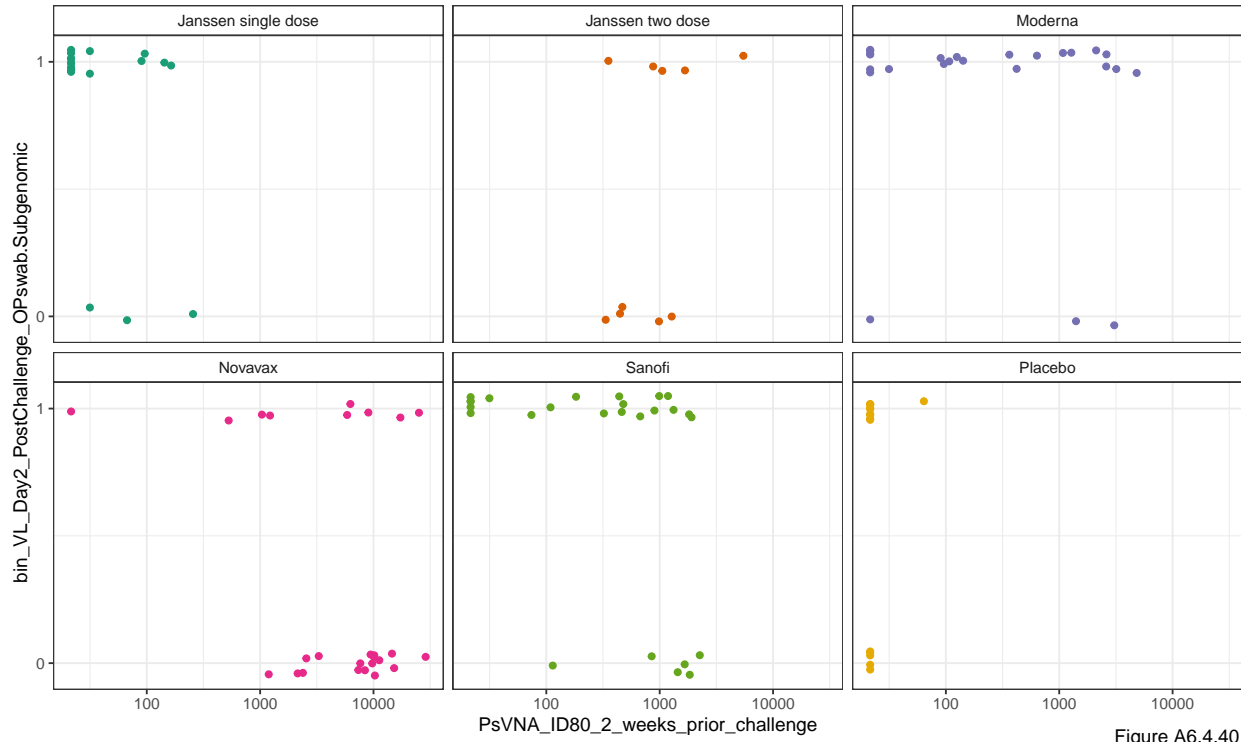

Figure A6.4.40

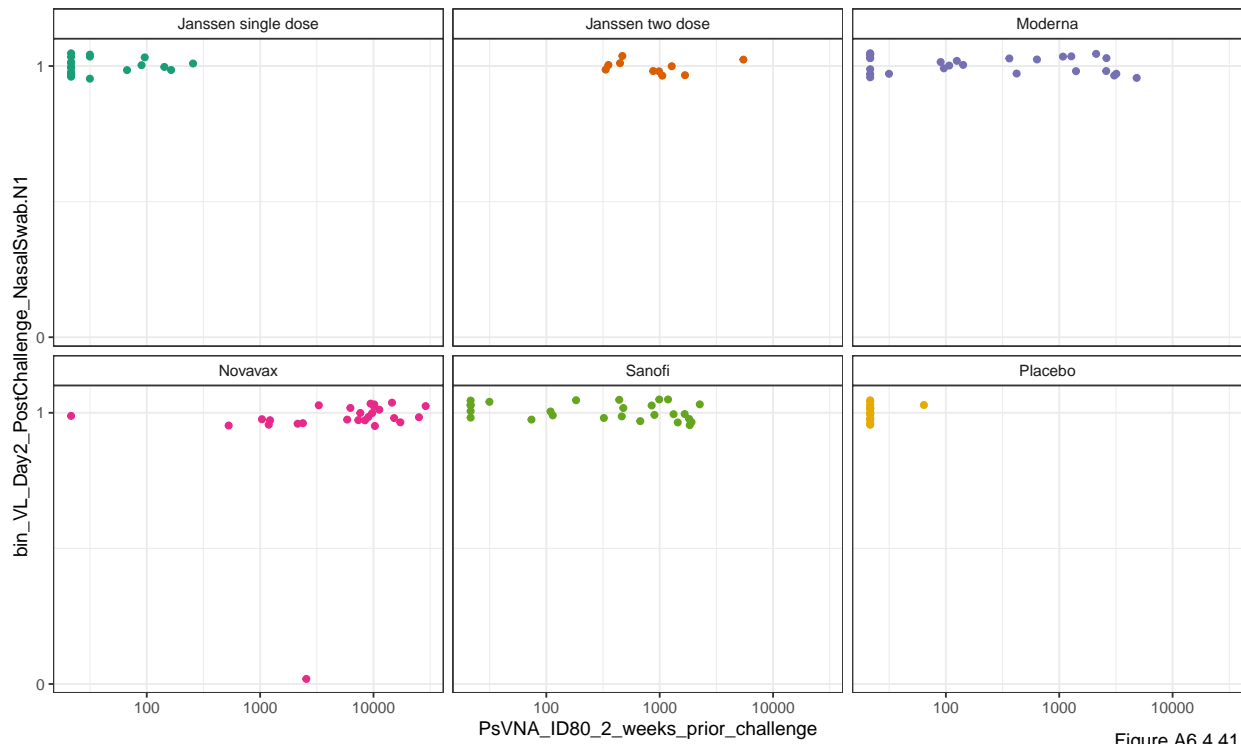

Figure A6.4.41

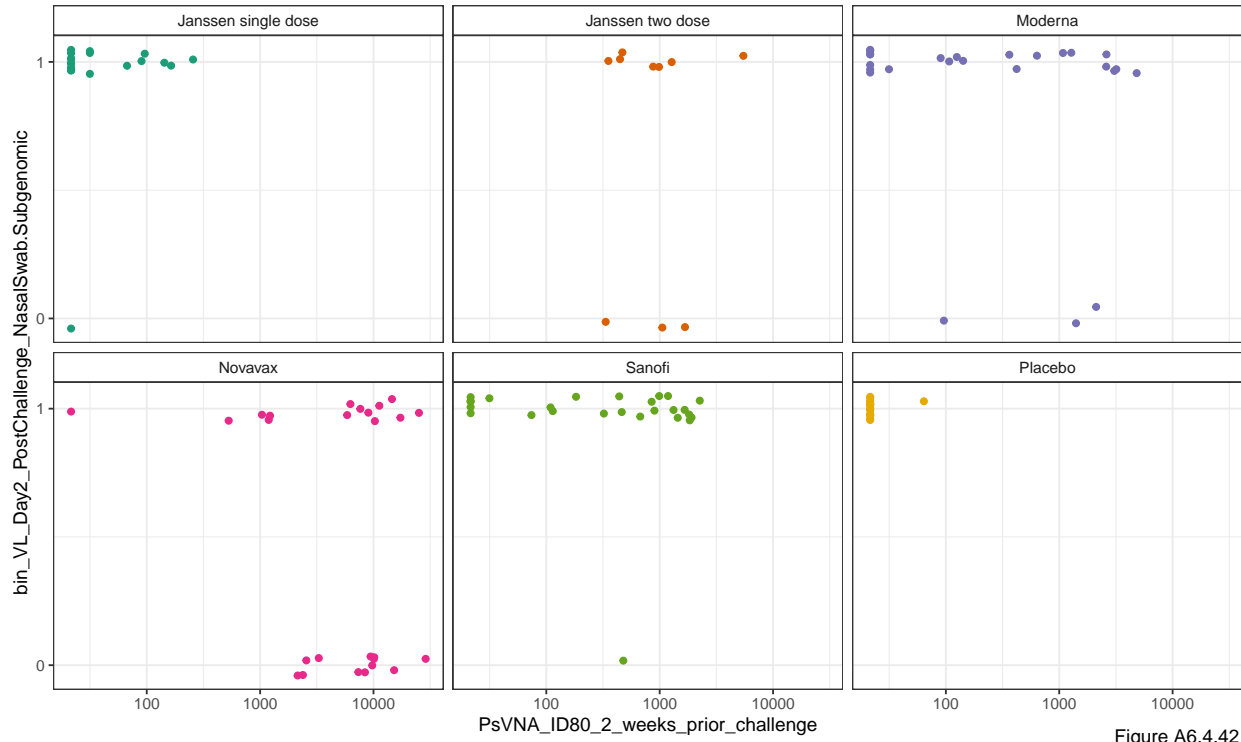

Figure A6.4.42

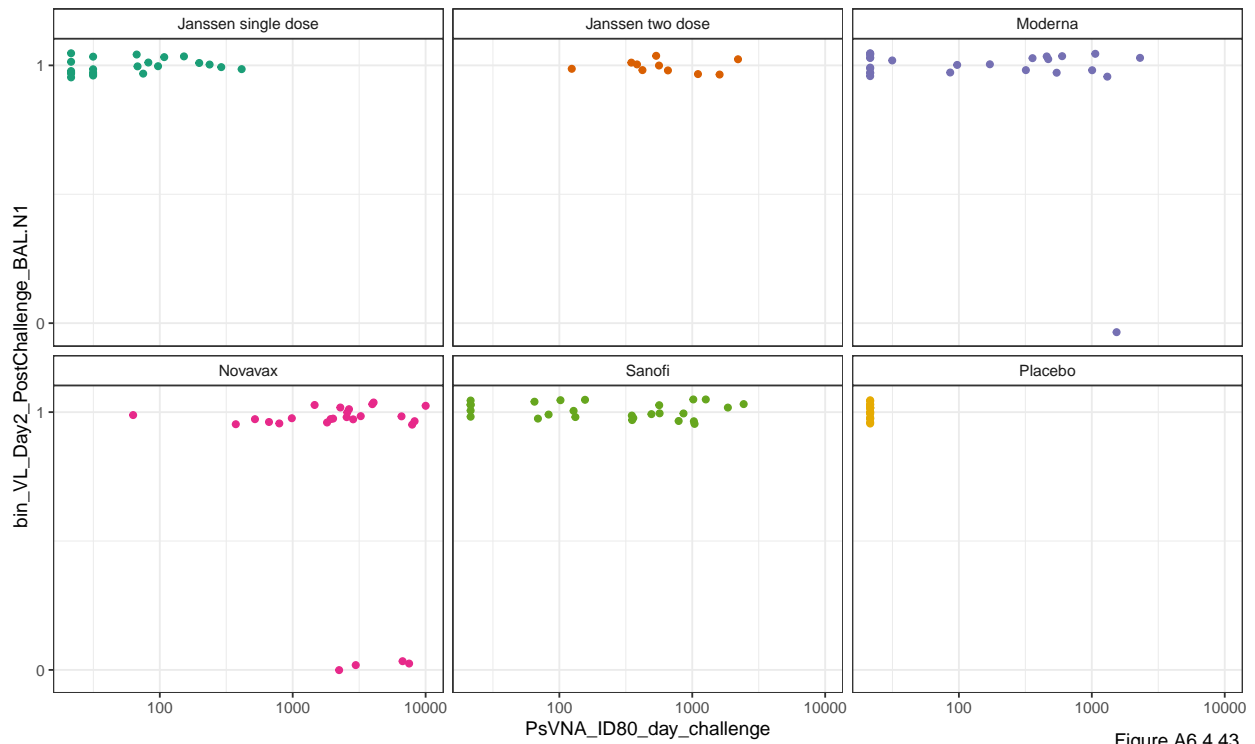

Figure A6.4.43

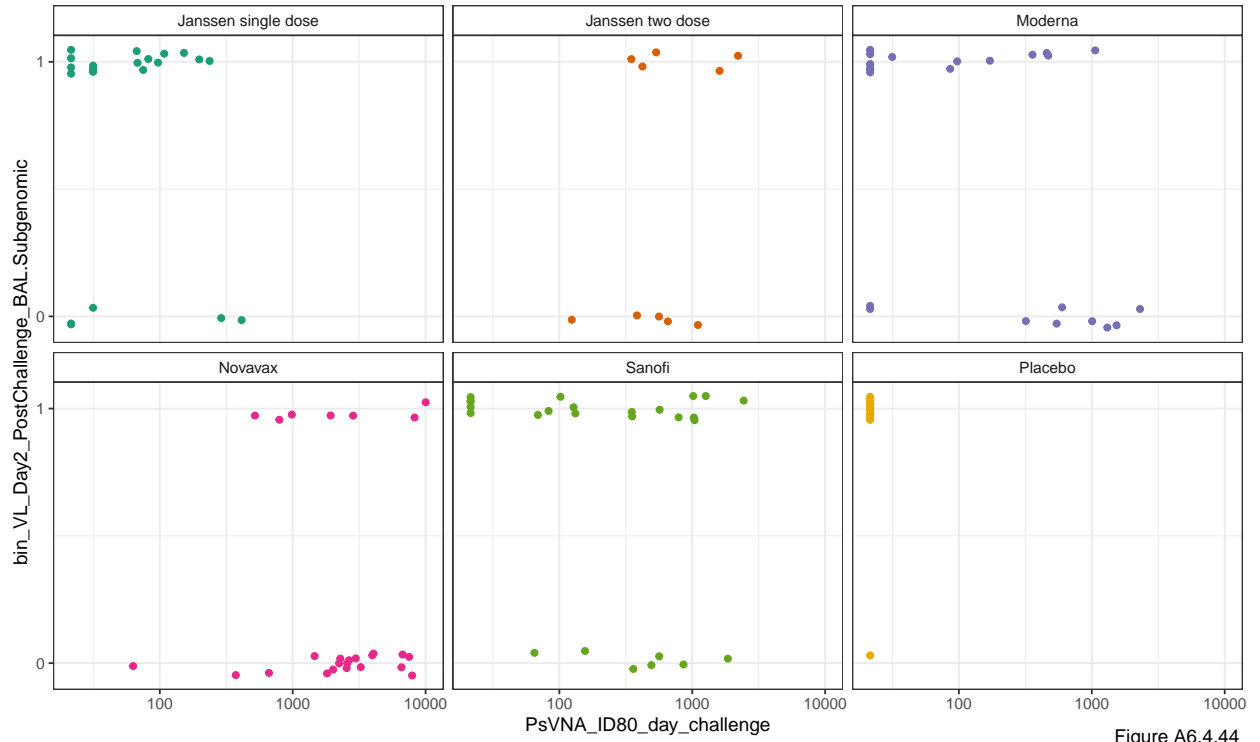

Figure A6.4.44

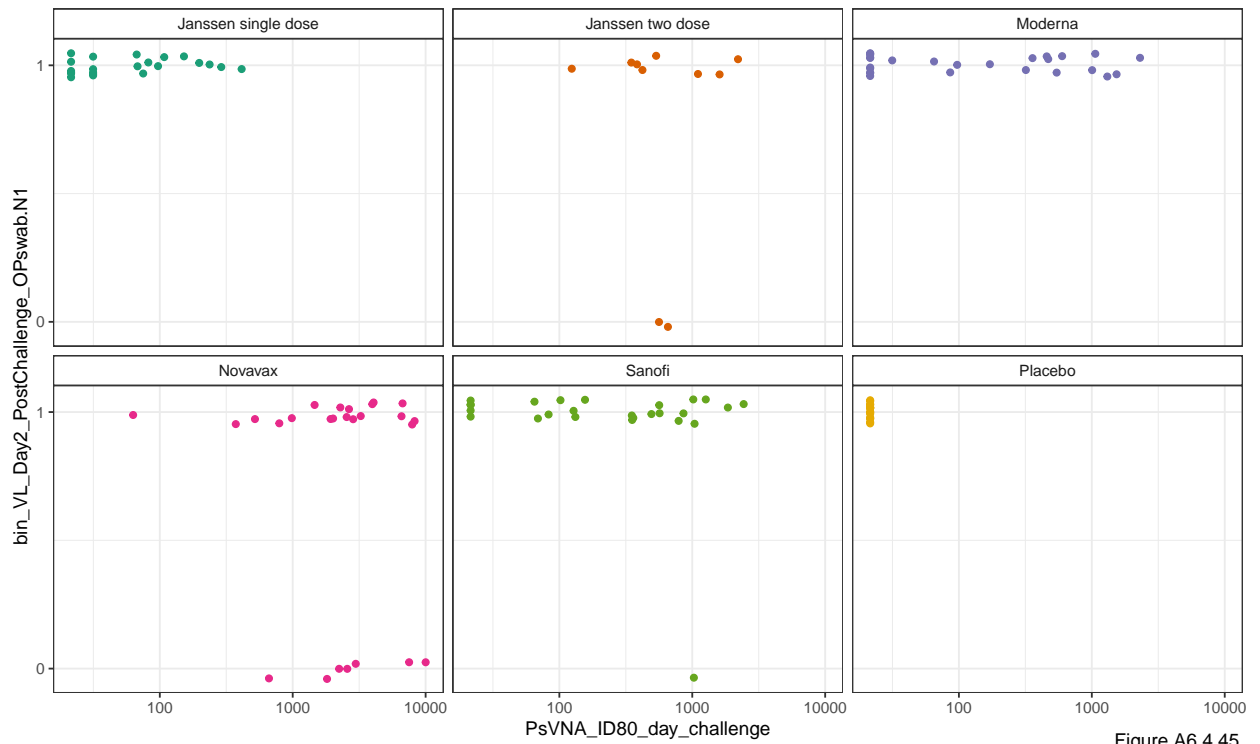

Figure A6.4.45

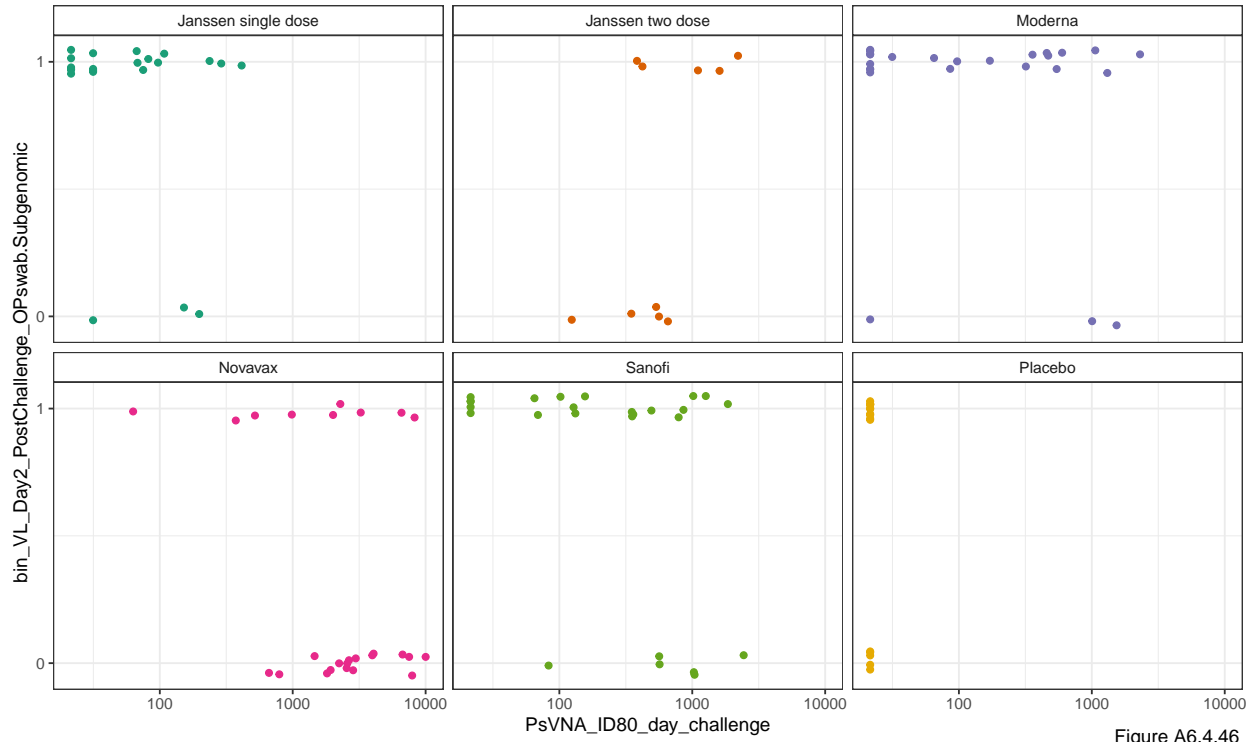

Figure A6.4.46

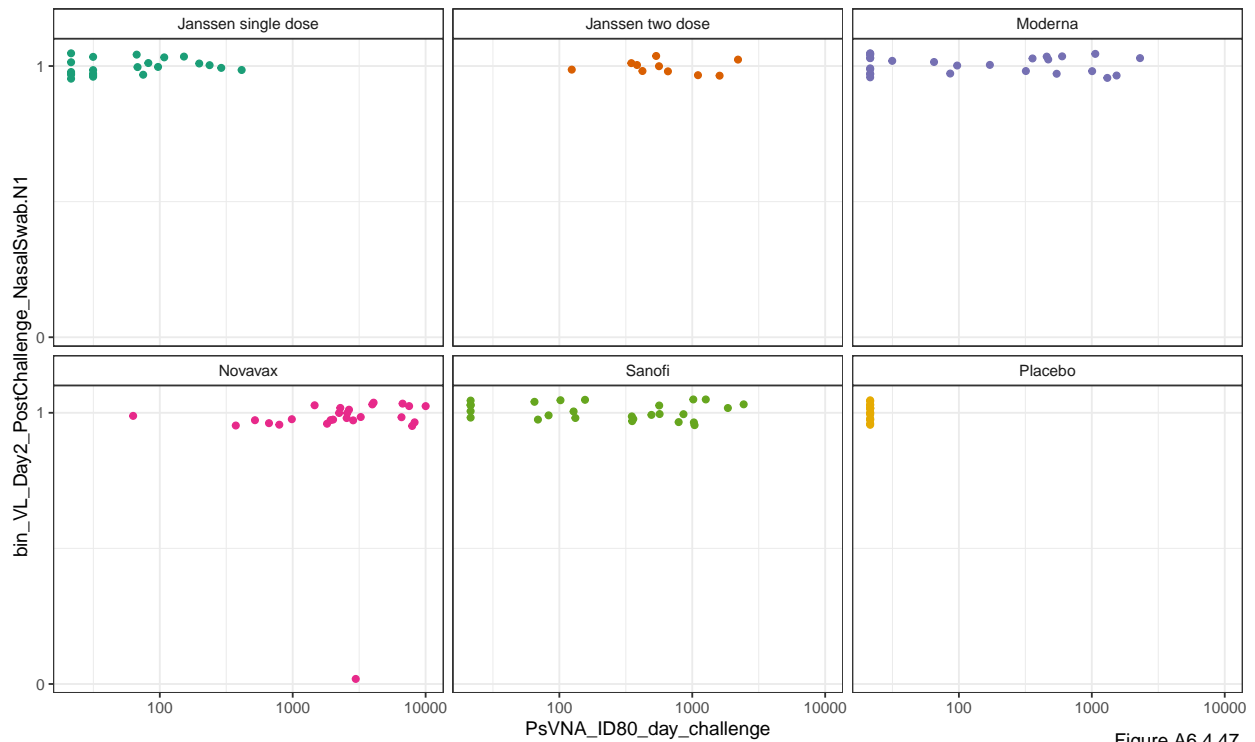

Figure A6.4.47

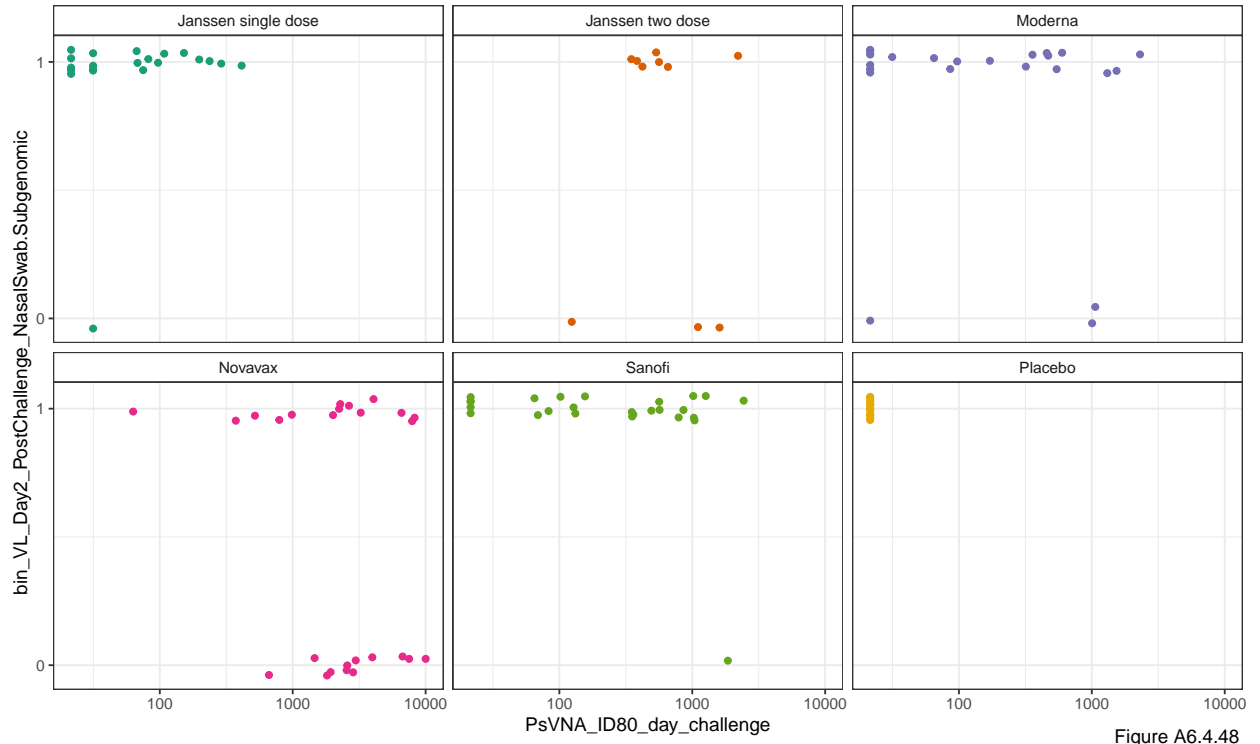

Figure A6.4.48
