# Supplementary material for: Humoral Immune Correlates Analysis of Four Vaccines Against SARS-CoV-2 in Rhesus Macaques
Source: Research Square preprint supplement (doi:10.21203/rs.3.rs-9404931/v1), 2026-04-30
Supplement: Supplementary file 6 [file 6c997cd532c6b44f2b7344d5.pdf]

# CoP SAP 6.4

Allyson Mateja

May 23, 2024

## 6.4 Prediction of Post-Challenge Viral Load with Single Virus-Specific Antibody

The first step is to predict a post-challenge viral load (chosen from Section 3.3) using a virus-specific antibody (from Section 3.2). Different models are used depending on whether the post-challenge viral load is binary or numeric.

### 6.4.1 Numeric Viral Load

For numeric viral load, several models will be fit using the log of the response value. Let  $y_{jk}$  and  $x_{jk}$  be the outcome (e.g., log of the viral load) and the virus-specific antibody, respectively, for the  $k^{th}$  animal in the  $j^{th}$  arm. Let  $\mu_{jk}$  be the mean response associated with  $y_{jk}$ . For this model, the vaccine arm is not modeled, so that two animals from different vaccine arms with the same value of virus-specific antibody will have the same predicted response. Several different models will be fit to the data, and best model will be selected by repeated cross validation with 500 replicates, where a certain proportion of the animals (e.g., 10%) are randomly left out of the model building and those left-out animals will be used to compare the fits of different models by adjusted R-squared. The animals selected for the test set will be stratified by challenge day; 1-2 animals will be selected per challenge day with the added constraint that both animals selected from a given day will not both be placebo.

The simplest model tried will be the linear model:  $\mu_{jk} = \beta_0 + \beta_1 x_{jk}$ . Another model is an exponential model (see e.g., McMahan, et al, 2020, Fig. 2). A third set of models are segmented regression models, with 2 breakpoints, using the segmented R package (Muggeo, 2020). A fourth set of models are fit with natural cubic splines with 5 degrees of freedom, using the default knots in the ns function in the spline R package. Finally, a four parameter logistic (4-PL) model may also be evaluated using the drm function in the drc R package (Ritz et al., 2015):  $\mu_{jk} = B + ((A - B)/(1 + (x_{jk}/C)^D))$ , where the 4-PL parameters are: A = lower asymptote, B = upper asymptote, C = midpoint, D = slope parameter. That model will be fit by least squares and the BFGS optimization method.

$$f(x) = c + \frac{d-c}{1+\exp(b(\log(x)-\log(e)))}$$

If the cross-validation produces a model with substantial non-monotonicity, we may remove that model type from consideration and repeat the CV without that model. This process may be repeated if necessary.

Once the model is selected by cross validation, the selected model will be fit to all of the data. If the selected model is not segmented regression, pointwise confidence intervals on the predicted values will be calculated using the parametric formula:  $\hat{y}_{jk} \pm t_{\alpha/2,df} SE$ , where  $\hat{y}_{jk}$  = the estimated predicted value for the  $k^{th}$  animal in the  $j^{th}$  arm, SE = the standard error for the estimate of the predicted value, and  $t_{\alpha/2,df}$  = critical value from the t distribution corresponding to  $\alpha/2$  and n-p degrees of freedom (p includes the intercept, where applicable). This is analogous to the built-in predict functions in R. If the segmented regression model is selected by the cross-validation procedure, pointwise confidence intervals on the predicted values will be calculated by nonparametric bootstrap.

Table 6.4.1: Model Selection Results Using Single Virus-Specific Antibody to Predict Post Challenge Viral Load - Numeric

| Virus-Specific Antibody                | Viral Load                                     | Model Selected | Adjusted Rsq | Figure Number |
|----------------------------------------|------------------------------------------------|----------------|--------------|---------------|
| log MN day challenge                   | AUC BAL N1                                     | exp            | 0.522        | 6.4.2         |
| log PsVNA ID80 day challenge           | AUC Nasal Swab Subgenomic                      | lm             | 0.504        | 6.4.32        |
| log PsVNA ID80 day challenge           | AUC Nasal Swab N1                              | lm             | 0.500        | 6.4.24        |
| log MN 2 weeks prior challenge         | AUC Nasal Swab Subgenomic                      | lm             | 0.494        | 6.4.25        |
| log MN 2 weeks prior challenge         | AUC Nasal Swab N1                              | lm             | 0.474        | 6.4.17        |
| log MSD ECL day challenge              | AUC Nasal Swab N1                              | lm             | 0.472        | 6.4.20        |
| log PsVNA ID80 2 weeks prior challenge | AUC Nasal Swab Subgenomic                      | lm             | 0.472        | 6.4.31        |
| log MN day challenge                   | AUC Nasal Swab Subgenomic                      | lm             | 0.468        | 6.4.26        |
| log PsVNA ID80 day challenge           | log VL Day2 PostChallenge NasalSwab N1         | lm             | 0.458        | 6.4.88        |
| log MSD ECL 2 weeks prior challenge    | AUC Nasal Swab N1                              | lm             | 0.456        | 6.4.19        |
| log MSD ECL day challenge              | AUC BAL N1                                     | lm             | 0.448        | 6.4.4         |
| log PsVNA ID80 2 weeks prior challenge | AUC Nasal Swab N1                              | lm             | 0.446        | 6.4.23        |
| log PsVNA ID80 2 weeks prior challenge | log VL Day2 PostChallenge NasalSwab N1         | lm             | 0.446        | 6.4.87        |
| log MN day challenge                   | AUC Nasal Swab N1                              | lm             | 0.445        | 6.4.18        |
| log PsVNA ID50 2 weeks prior challenge | AUC Nasal Swab Subgenomic                      | lm             | 0.443        | 6.4.29        |
| log MSD ECL day challenge              | AUC Nasal Swab Subgenomic                      | lm             | 0.441        | 6.4.28        |
| log PsVNA ID50 2 weeks prior challenge | log VL Day2 PostChallenge NasalSwab N1         | lm             | 0.440        | 6.4.85        |
| log PsVNA ID80 2 weeks prior challenge | log VL Day2 PostChallenge NasalSwab Subgenomic | lm             | 0.439        | 6.4.95        |

Table 6.4.1: Model Selection Results Using Single Virus-Specific Antibody to Predict Post Challenge Viral Load - Numeric (*continued*)

| Virus-Specific Antibody                | Viral Load                                     | Model Selected | Adjusted Rsq | Figure Number |
|----------------------------------------|------------------------------------------------|----------------|--------------|---------------|
| log MN 2 weeks prior challenge         | log VL Day2 PostChallenge NasalSwab Subgenomic | lm             | 0.438        | 6.4.89        |
| log MSD ECL 2 weeks prior challenge    | AUC Nasal Swab Subgenomic                      | lm             | 0.434        | 6.4.27        |
| log PsVNA ID80 day challenge           | log VL Day2 PostChallenge NasalSwab Subgenomic | lm             | 0.434        | 6.4.96        |
| log MN 2 weeks prior challenge         | log VL Day2 PostChallenge NasalSwab N1         | lm             | 0.431        | 6.4.81        |
| log MN day challenge                   | AUC BAL Subgenomic                             | exp            | 0.426        | 6.4.10        |
| log PsVNA ID50 day challenge           | AUC Nasal Swab N1                              | lm             | 0.424        | 6.4.22        |
| log PsVNA ID50 2 weeks prior challenge | AUC Nasal Swab N1                              | lm             | 0.423        | 6.4.21        |
| log PsVNA ID50 2 weeks prior challenge | log VL Day2 PostChallenge NasalSwab Subgenomic | lm             | 0.423        | 6.4.93        |
| log MSD ECL 2 weeks prior challenge    | AUC BAL N1                                     | lm             | 0.407        | 6.4.3         |
| log PsVNA ID50 day challenge           | AUC Nasal Swab Subgenomic                      | lm             | 0.404        | 6.4.30        |
| log MSD ECL day challenge              | AUC BAL Subgenomic                             | lm             | 0.392        | 6.4.12        |
| log MN 2 weeks prior challenge         | AUC BAL N1                                     | exp            | 0.389        | 6.4.1         |
| log PsVNA ID50 day challenge           | log VL Day2 PostChallenge NasalSwab N1         | lm             | 0.385        | 6.4.86        |
| log MSD ECL 2 weeks prior challenge    | log VL Day2 PostChallenge NasalSwab N1         | lm             | 0.381        | 6.4.83        |
| log PsVNA ID50 day challenge           | log VL Day2 PostChallenge NasalSwab Subgenomic | exp            | 0.367        | 6.4.94        |
| log MN day challenge                   | log VL Day2 PostChallenge NasalSwab N1         | lm             | 0.366        | 6.4.82        |

Table 6.4.1: Model Selection Results Using Single Virus-Specific Antibody to Predict Post Challenge Viral Load - Numeric (*continued*)

| Virus-Specific Antibody                | Viral Load                                     | Model Selected | Adjusted Rsq | Figure Number |
|----------------------------------------|------------------------------------------------|----------------|--------------|---------------|
| log MN day challenge                   | log VL Day2 PostChallenge NasalSwab Subgenomic | lm             | 0.365        | 6.4.90        |
| log PsVNA ID80 day challenge           | AUC BAL N1                                     | exp            | 0.363        | 6.4.8         |
| log MSD ECL 2 weeks prior challenge    | log VL Day2 PostChallenge NasalSwab Subgenomic | lm             | 0.360        | 6.4.91        |
| log MSD ECL day challenge              | AUC OP Swab N1                                 | lm             | 0.357        | 6.4.36        |
| log PsVNA ID80 day challenge           | AUC OP Swab N1                                 | lm             | 0.355        | 6.4.40        |
| log MSD ECL 2 weeks prior challenge    | AUC OP Swab N1                                 | lm             | 0.343        | 6.4.35        |
| log MSD ECL day challenge              | log VL Day2 PostChallenge NasalSwab N1         | lm             | 0.343        | 6.4.84        |
| log MSD ECL 2 weeks prior challenge    | AUC BAL Subgenomic                             | lm             | 0.341        | 6.4.11        |
| log PsVNA ID80 2 weeks prior challenge | AUC BAL N1                                     | lm             | 0.335        | 6.4.7         |
| log MN day challenge                   | log VL Day2 PostChallenge BAL N1               | lm             | 0.334        | 6.4.50        |
| log MN day challenge                   | AUC OP Swab N1                                 | lm             | 0.330        | 6.4.34        |
| log MSD ECL day challenge              | log VL Day2 PostChallenge NasalSwab Subgenomic | lm             | 0.330        | 6.4.92        |
| log PsVNA ID80 2 weeks prior challenge | AUC OP Swab N1                                 | lm             | 0.326        | 6.4.39        |
| log MN 2 weeks prior challenge         | AUC OP Swab N1                                 | lm             | 0.324        | 6.4.33        |
| log MN day challenge                   | log VL Day2 PostChallenge BAL Subgenomic       | lm             | 0.322        | 6.4.58        |
| log PsVNA ID50 2 weeks prior challenge | AUC OP Swab N1                                 | lm             | 0.316        | 6.4.37        |

Table 6.4.1: Model Selection Results Using Single Virus-Specific Antibody to Predict Post Challenge Viral Load - Numeric (*continued*)

| Virus-Specific Antibody                | Viral Load                               | Model Selected | Adjusted Rsq | Figure Number |
|----------------------------------------|------------------------------------------|----------------|--------------|---------------|
| log MN 2 weeks prior challenge         | AUC BAL Subgenomic                       | exp            | 0.310        | 6.4.9         |
| log PsVNA ID50 2 weeks prior challenge | AUC BAL N1                               | lm             | 0.303        | 6.4.5         |
| log PsVNA ID50 day challenge           | AUC BAL N1                               | exp            | 0.284        | 6.4.6         |
| log PsVNA ID80 2 weeks prior challenge | log VL Day2 PostChallenge BAL Subgenomic | lm             | 0.262        | 6.4.63        |
| log PsVNA ID80 day challenge           | AUC BAL Subgenomic                       | exp            | 0.261        | 6.4.16        |
| log PsVNA ID80 day challenge           | log VL Day2 PostChallenge BAL N1         | lm             | 0.260        | 6.4.56        |
| log PsVNA ID80 day challenge           | log VL Day2 PostChallenge BAL Subgenomic | exp            | 0.260        | 6.4.64        |
| log PsVNA ID50 2 weeks prior challenge | log VL Day2 PostChallenge BAL N1         | lm             | 0.259        | 6.4.53        |
| log MSD ECL day challenge              | log VL Day2 PostChallenge BAL Subgenomic | lm             | 0.259        | 6.4.60        |
| log PsVNA ID50 2 weeks prior challenge | log VL Day2 PostChallenge BAL Subgenomic | lm             | 0.259        | 6.4.61        |
| log MN 2 weeks prior challenge         | log VL Day2 PostChallenge BAL Subgenomic | lm             | 0.257        | 6.4.57        |
| log PsVNA ID80 2 weeks prior challenge | log VL Day2 PostChallenge BAL N1         | lm             | 0.253        | 6.4.55        |
| log PsVNA ID50 day challenge           | AUC OP Swab N1                           | lm             | 0.249        | 6.4.38        |
| log PsVNA ID80 2 weeks prior challenge | AUC BAL Subgenomic                       | exp            | 0.247        | 6.4.15        |
| log MSD ECL day challenge              | AUC OP Swab Subgenomic                   | lm             | 0.247        | 6.4.44        |
| log MSD ECL day challenge              | log VL Day2 PostChallenge BAL N1         | lm             | 0.244        | 6.4.52        |
| log MN 2 weeks prior challenge         | log VL Day2 PostChallenge BAL N1         | lm             | 0.241        | 6.4.49        |

Table 6.4.1: Model Selection Results Using Single Virus-Specific Antibody to Predict Post Challenge Viral Load - Numeric (*continued*)

| Virus-Specific Antibody                | Viral Load                                  | Model Selected | Adjusted Rsq | Figure Number |
|----------------------------------------|---------------------------------------------|----------------|--------------|---------------|
| log MSD ECL 2 weeks prior challenge    | log VL Day2 PostChallenge BAL Subgenomic    | lm             | 0.237        | 6.4.59        |
| log PsVNA ID80 day challenge           | AUC OP Swab Subgenomic                      | lm             | 0.235        | 6.4.48        |
| log MSD ECL 2 weeks prior challenge    | AUC OP Swab Subgenomic                      | lm             | 0.231        | 6.4.43        |
| log MN 2 weeks prior challenge         | AUC OP Swab Subgenomic                      | lm             | 0.230        | 6.4.41        |
| log MSD ECL 2 weeks prior challenge    | log VL Day2 PostChallenge BAL N1            | lm             | 0.228        | 6.4.51        |
| log PsVNA ID80 2 weeks prior challenge | AUC OP Swab Subgenomic                      | lm             | 0.226        | 6.4.47        |
| log PsVNA ID50 2 weeks prior challenge | AUC OP Swab Subgenomic                      | lm             | 0.222        | 6.4.45        |
| log MN day challenge                   | AUC OP Swab Subgenomic                      | lm             | 0.211        | 6.4.42        |
| log PsVNA ID50 day challenge           | log VL Day2 PostChallenge BAL Subgenomic    | exp            | 0.208        | 6.4.62        |
| log PsVNA ID50 2 weeks prior challenge | AUC BAL Subgenomic                          | exp            | 0.205        | 6.4.13        |
| log PsVNA ID50 day challenge           | log VL Day2 PostChallenge BAL N1            | exp            | 0.199        | 6.4.54        |
| log PsVNA ID80 day challenge           | log VL Day2 PostChallenge OPswab Subgenomic | lm             | 0.196        | 6.4.80        |
| log PsVNA ID80 2 weeks prior challenge | log VL Day2 PostChallenge OPswab Subgenomic | lm             | 0.194        | 6.4.79        |
| log MN 2 weeks prior challenge         | log VL Day2 PostChallenge OPswab Subgenomic | lm             | 0.186        | 6.4.73        |
| log PsVNA ID50 2 weeks prior challenge | log VL Day2 PostChallenge OPswab Subgenomic | lm             | 0.182        | 6.4.77        |

Table 6.4.1: Model Selection Results Using Single Virus-Specific Antibody to Predict Post Challenge Viral Load - Numeric (*continued*)

| Virus-Specific Antibody                | Viral Load                                  | Model Selected | Adjusted Rsq | Figure Number |
|----------------------------------------|---------------------------------------------|----------------|--------------|---------------|
| log PsVNA ID50 day challenge           | AUC BAL Subgenomic                          | exp            | 0.180        | 6.4.14        |
| log PsVNA ID50 day challenge           | log VL Day2 PostChallenge OPswab Subgenomic | lm             | 0.167        | 6.4.78        |
| log PsVNA ID80 day challenge           | log VL Day2 PostChallenge OPswab N1         | lm             | 0.158        | 6.4.72        |
| log MN 2 weeks prior challenge         | log VL Day2 PostChallenge OPswab N1         | lm             | 0.157        | 6.4.65        |
| log PsVNA ID80 2 weeks prior challenge | log VL Day2 PostChallenge OPswab N1         | lm             | 0.155        | 6.4.71        |
| log PsVNA ID50 2 weeks prior challenge | log VL Day2 PostChallenge OPswab N1         | lm             | 0.143        | 6.4.69        |
| log PsVNA ID50 day challenge           | AUC OP Swab Subgenomic                      | lm             | 0.138        | 6.4.46        |
| log MSD ECL 2 weeks prior challenge    | log VL Day2 PostChallenge OPswab Subgenomic | lm             | 0.129        | 6.4.75        |
| log MSD ECL day challenge              | log VL Day2 PostChallenge OPswab Subgenomic | lm             | 0.128        | 6.4.76        |
| log PsVNA ID50 day challenge           | log VL Day2 PostChallenge OPswab N1         | lm             | 0.124        | 6.4.70        |
| log MN day challenge                   | log VL Day2 PostChallenge OPswab Subgenomic | lm             | 0.120        | 6.4.74        |
| log MSD ECL day challenge              | log VL Day2 PostChallenge OPswab N1         | lm             | 0.112        | 6.4.68        |
| log MSD ECL 2 weeks prior challenge    | log VL Day2 PostChallenge OPswab N1         | lm             | 0.110        | 6.4.67        |
| log MN day challenge                   | log VL Day2 PostChallenge OPswab N1         | lm             | 0.101        | 6.4.66        |

There are 82 pairs of virus-specific antibodies/viral loads (out of 96 total pairs) where the best model fit is linear; 14 where the best model fit is exponential; 0 where the best model fit is segmented linear (with 2

breakpoints); 0 where the best model fit is natural cubic splines with 5 degrees of freedom; and 0 where the best model fit is 4-parameter logistic.

### Predicted Values

exp

Est. = 0.86 (0.83, 0.88),  $p < 0.001$

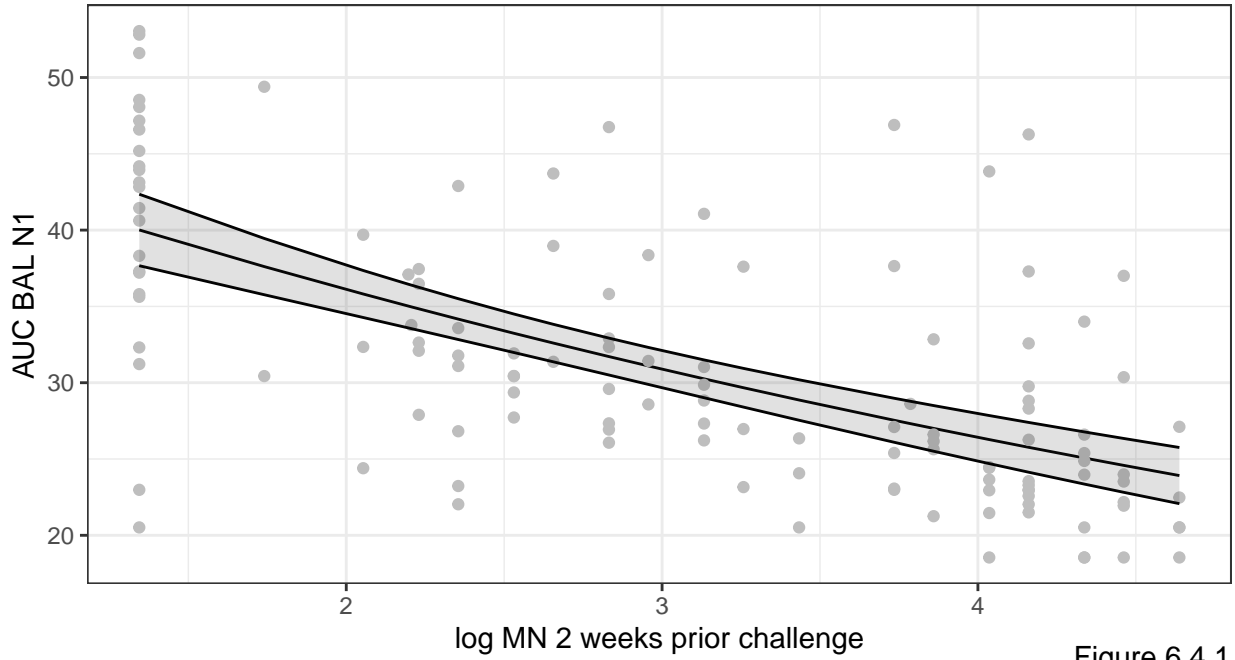

Figure 6.4.1

exp

Est. = 0.82 (0.79, 0.84),  $p < 0.001$

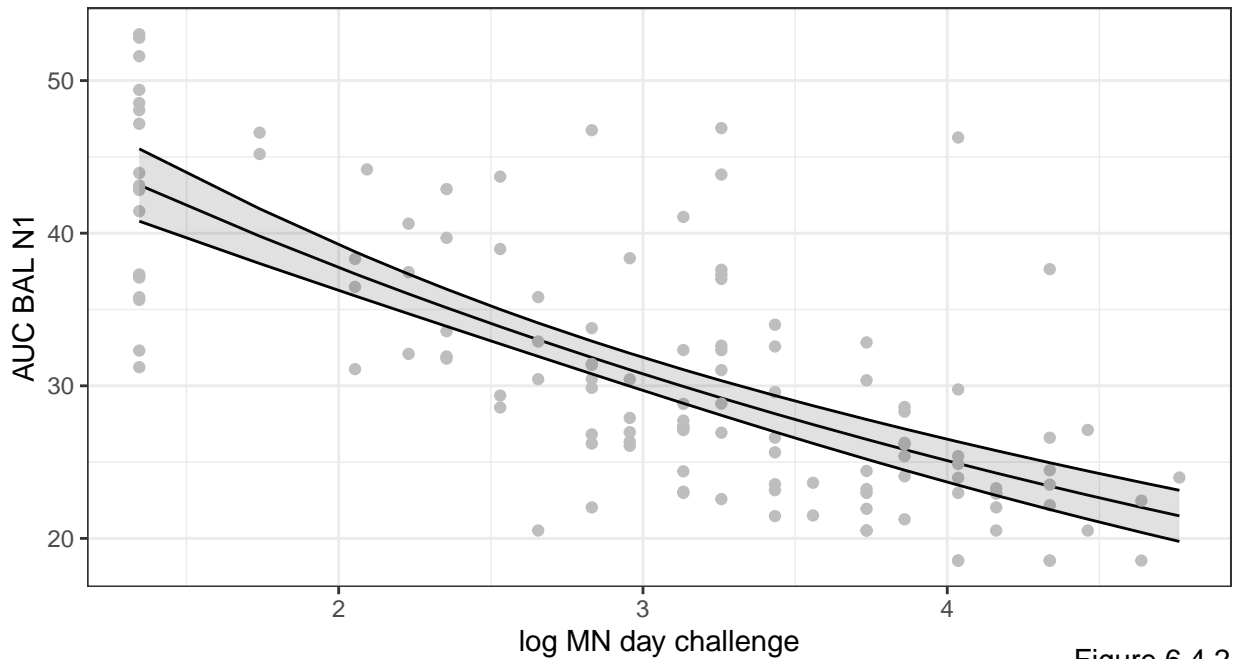

Figure 6.4.2

lm

Est. = -4.83 (-5.85, -3.82),  $p < 0.001$

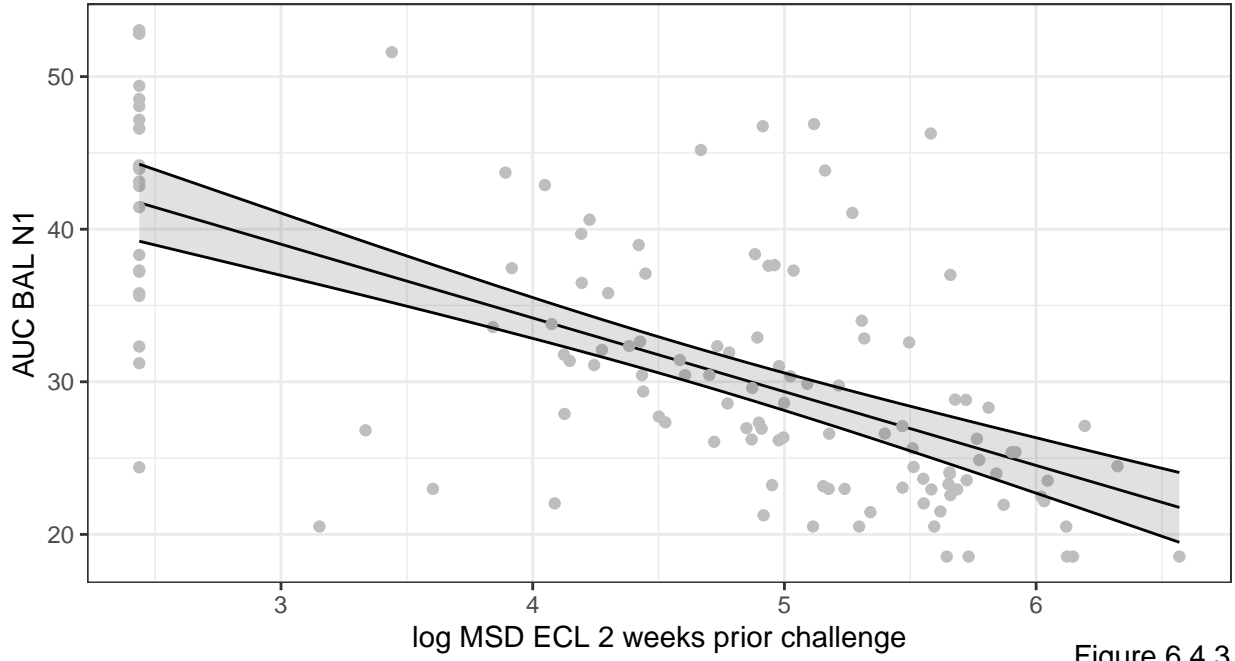

Figure 6.4.3

lm

Est. = -5.72 (-6.83, -4.61),  $p < 0.001$

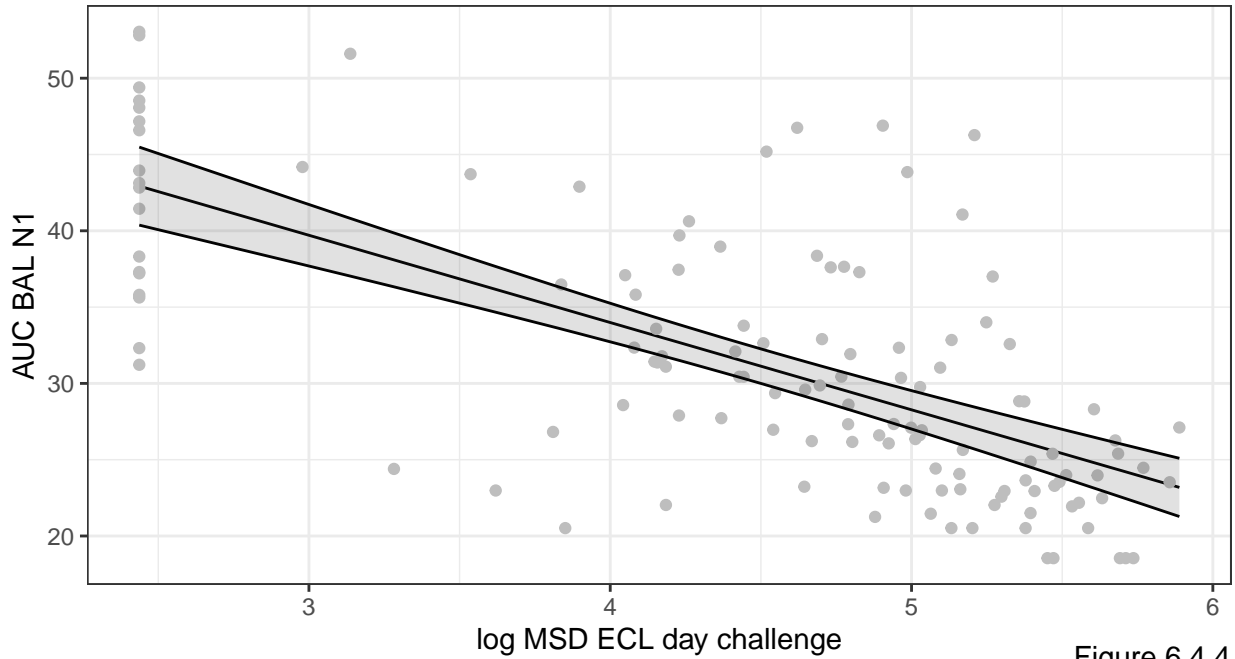

Figure 6.4.4

lm

Est. = -5.77 (-7.29, -4.25),  $p < 0.001$

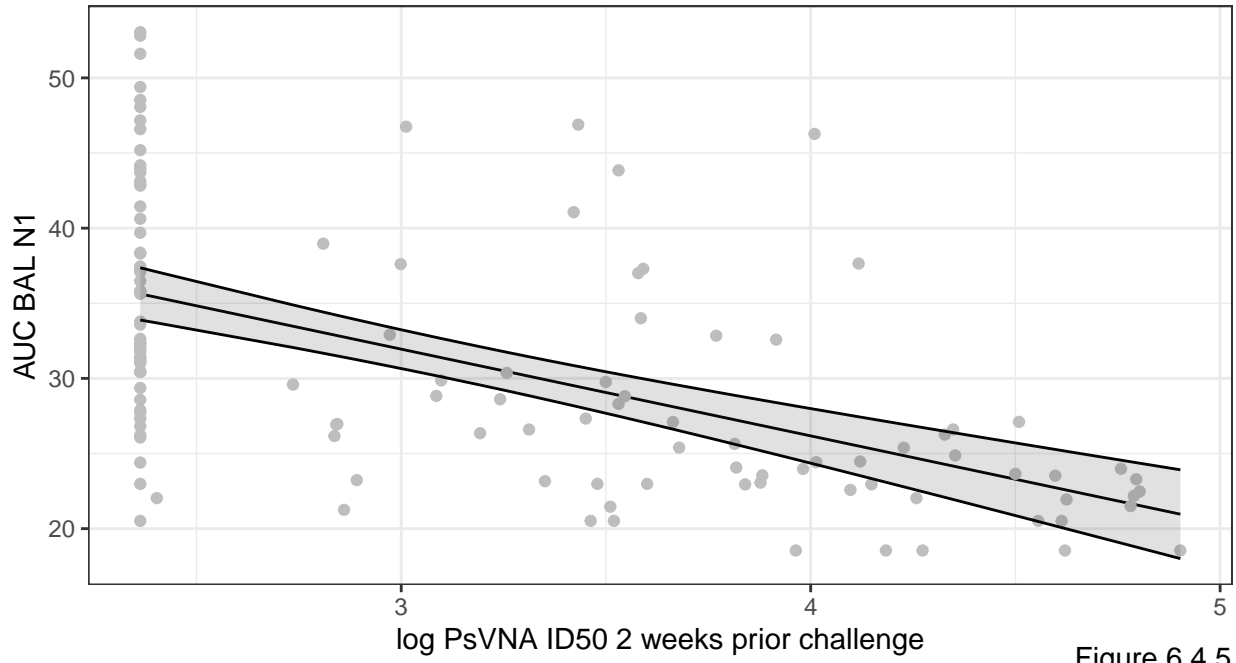

Figure 6.4.5

exp

Est. = 0.81 (0.76, 0.86),  $p < 0.001$

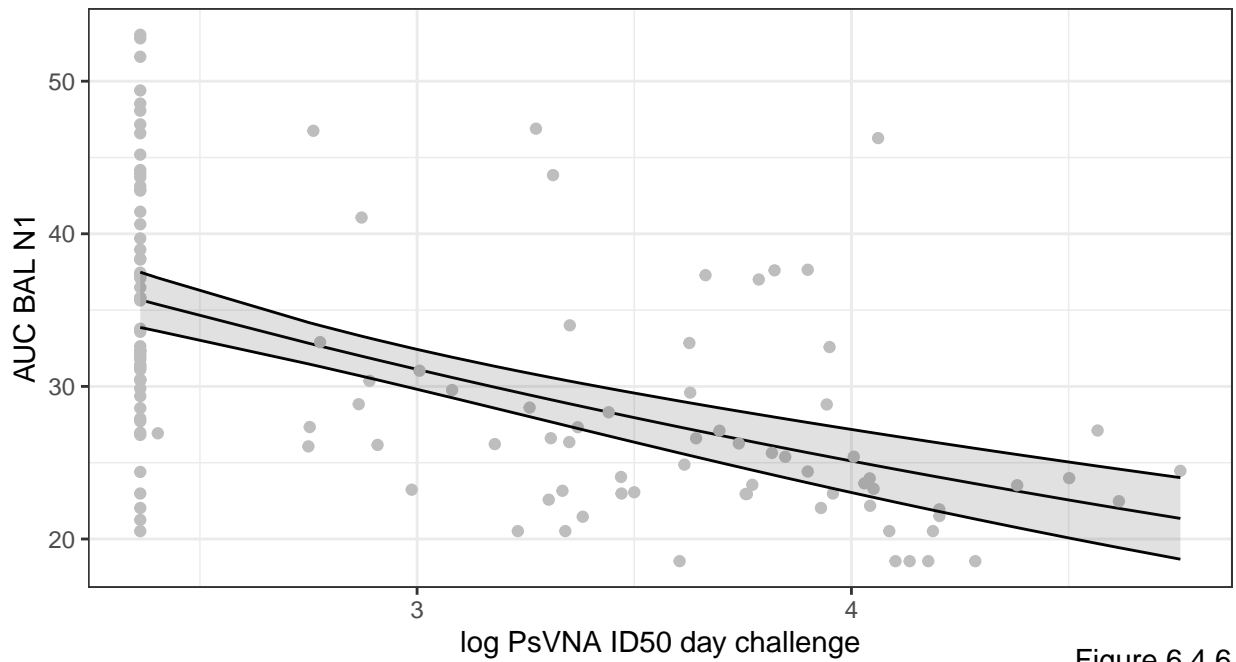

Figure 6.4.6

lm

Est. = -5.08 (-6.33, -3.84),  $p < 0.001$

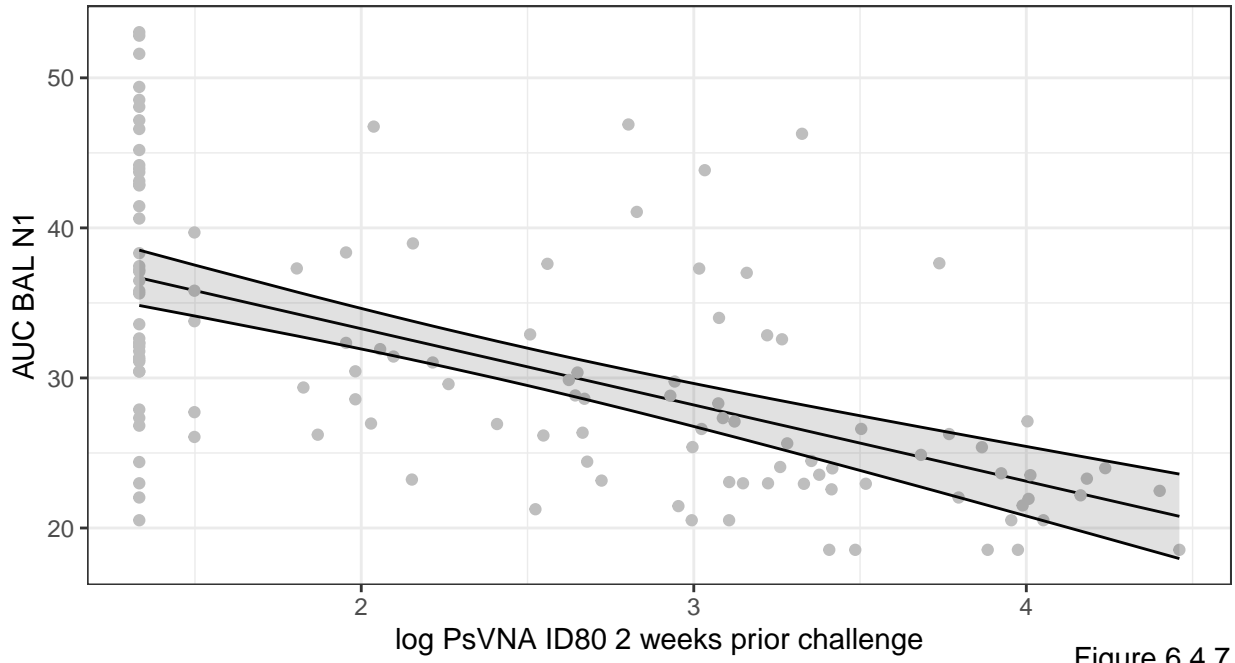

Figure 6.4.7

exp

Est. = 0.81 (0.77, 0.85),  $p < 0.001$

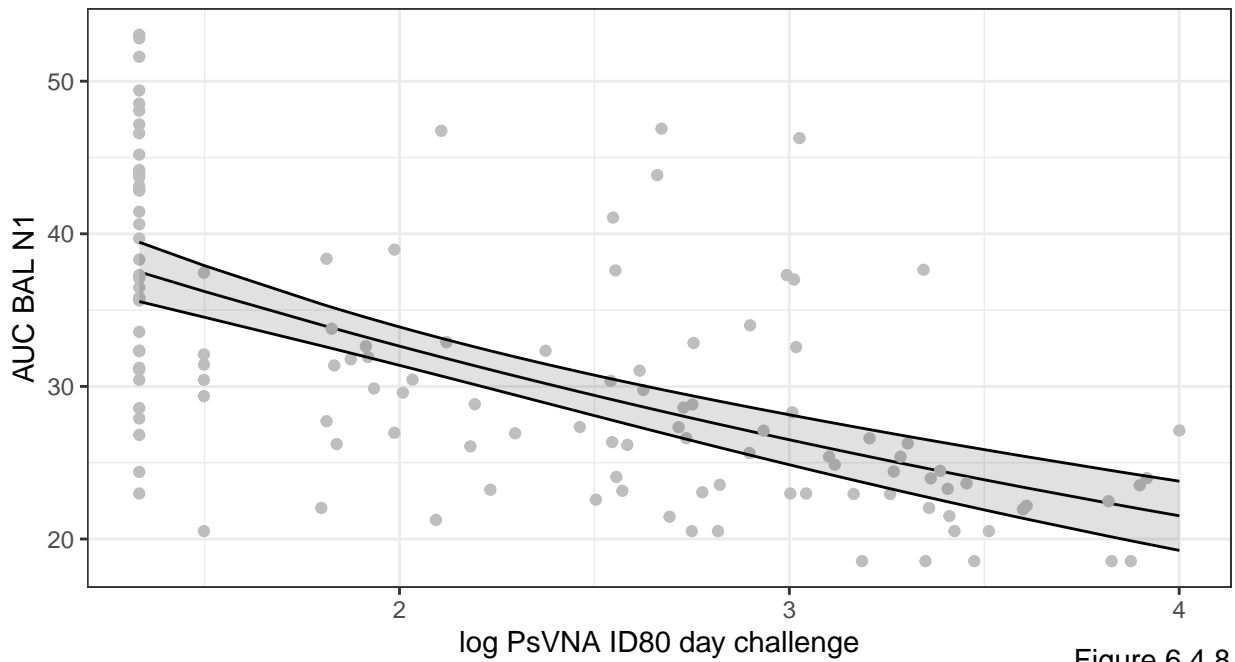

Figure 6.4.8

exp

Est. = 0.89 (0.87, 0.92),  $p < 0.001$

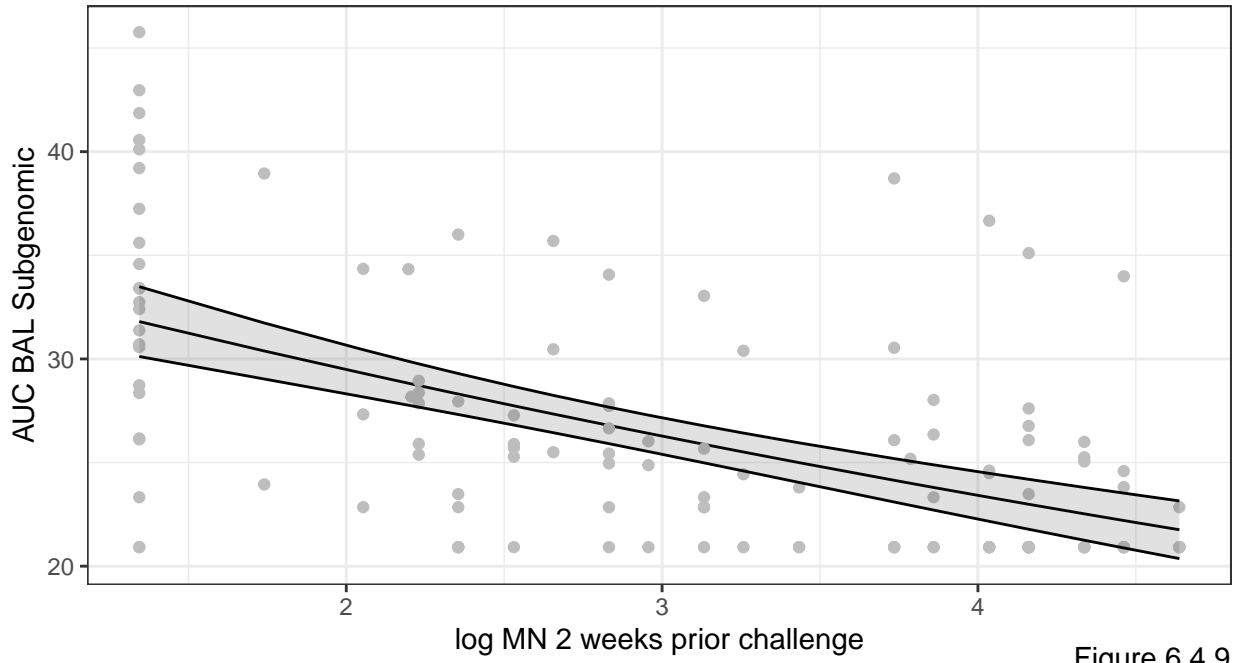

Figure 6.4.9

exp

Est. = 0.86 (0.83, 0.88),  $p < 0.001$

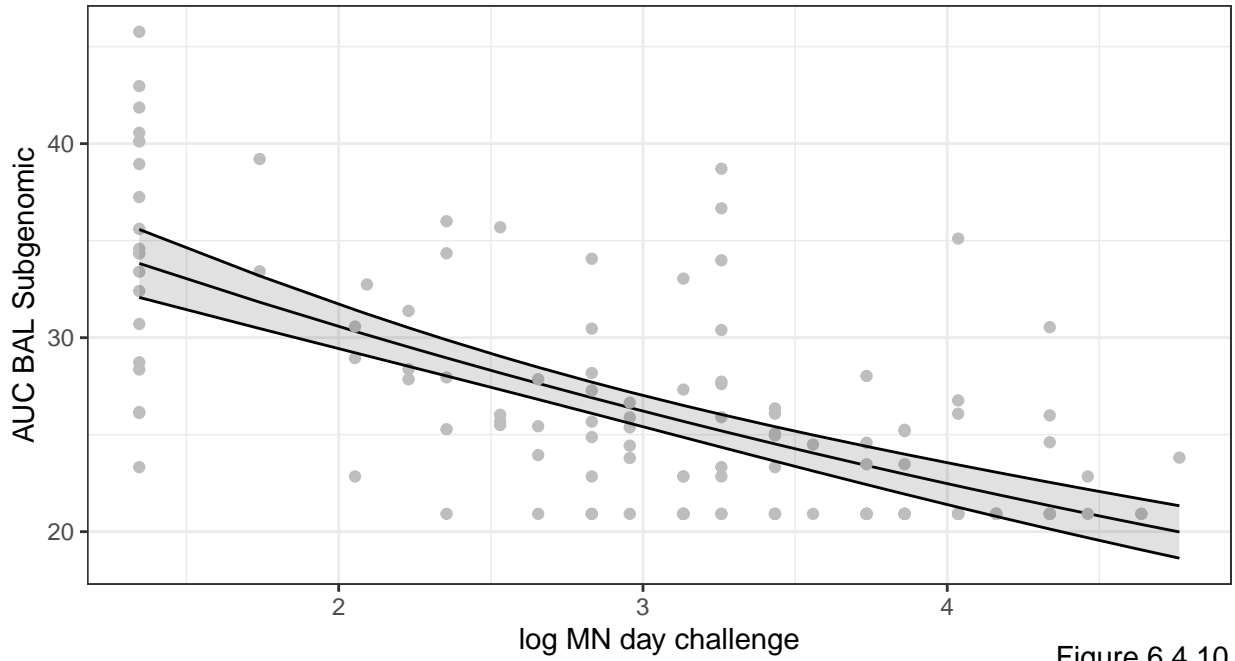

Figure 6.4.10

lm

Est. = -3.05 (-3.79, -2.32),  $p < 0.001$

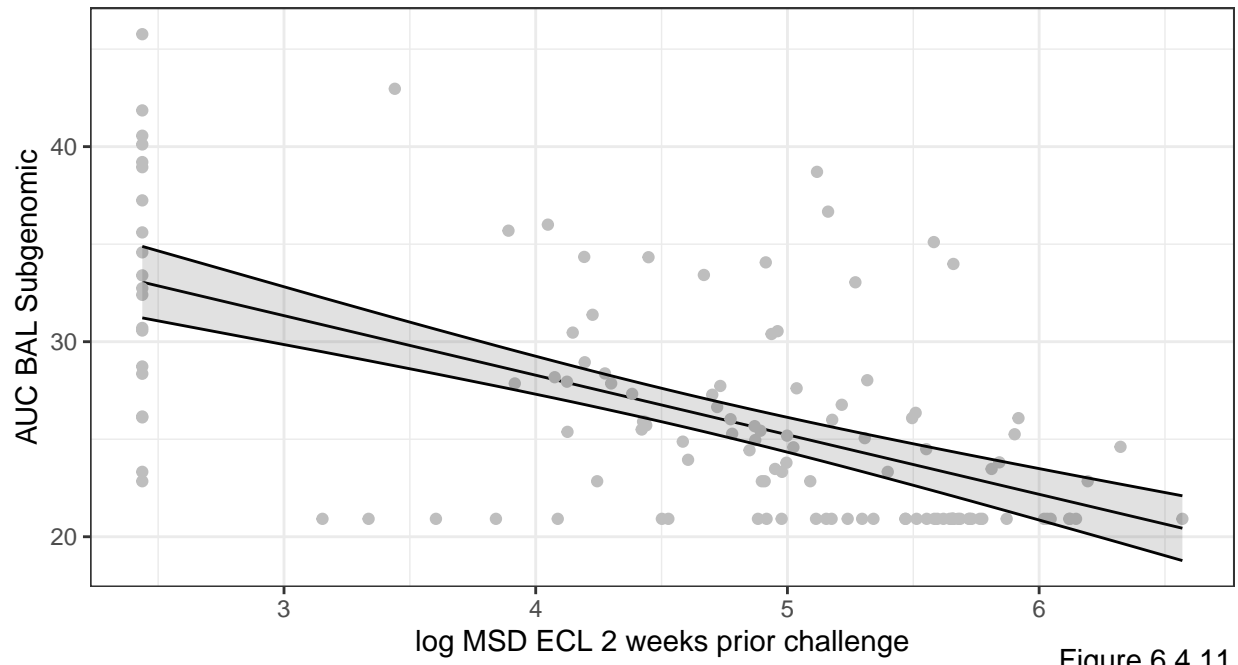

Figure 6.4.11

lm

Est. = -3.69 (-4.49, -2.89),  $p < 0.001$

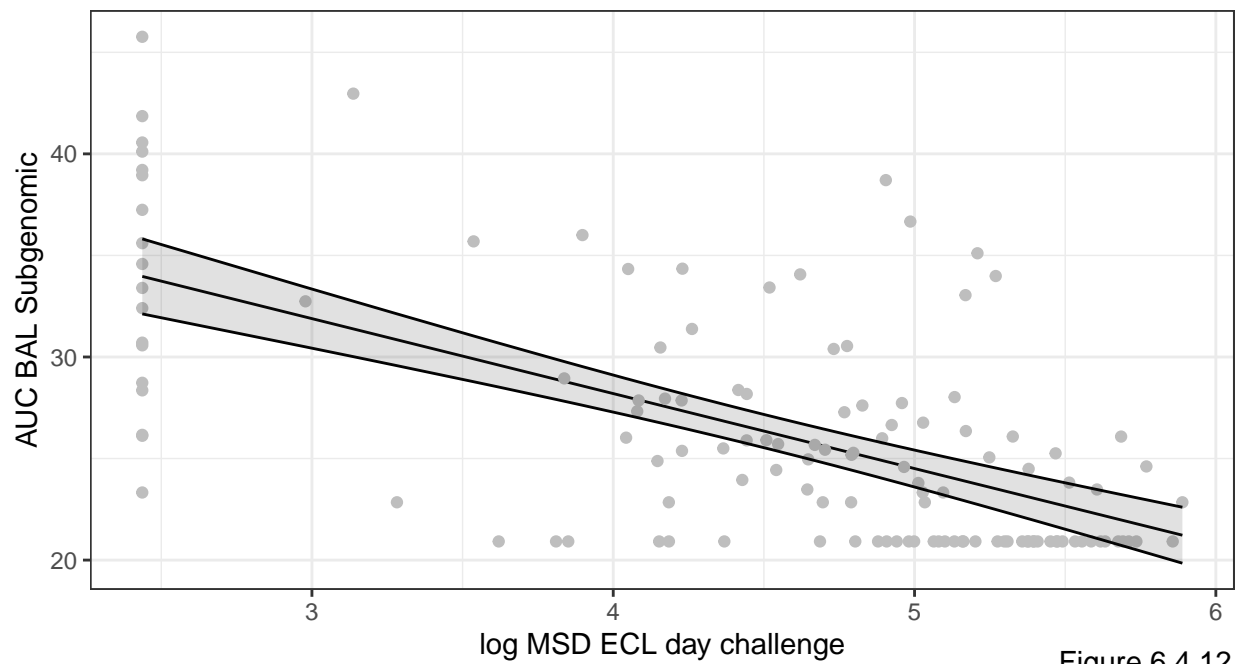

Figure 6.4.12

exp

Est. = 0.88 (0.84, 0.92),  $p < 0.001$

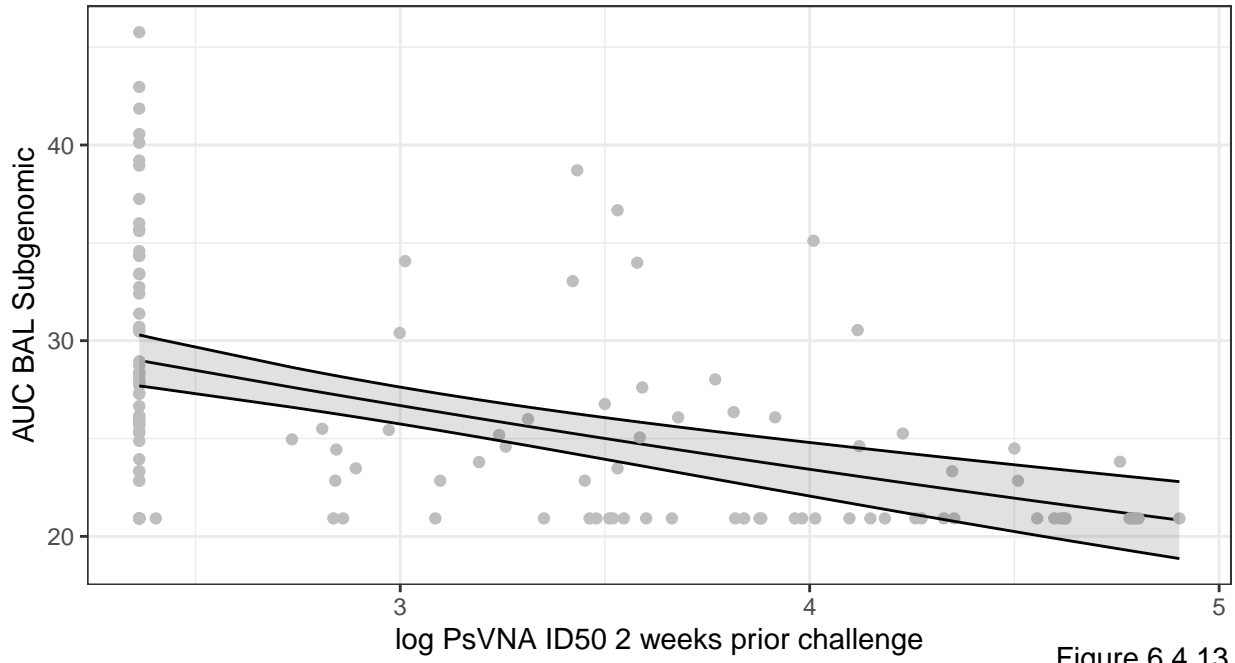

Figure 6.4.13

exp

Est. = 0.87 (0.83, 0.92),  $p < 0.001$

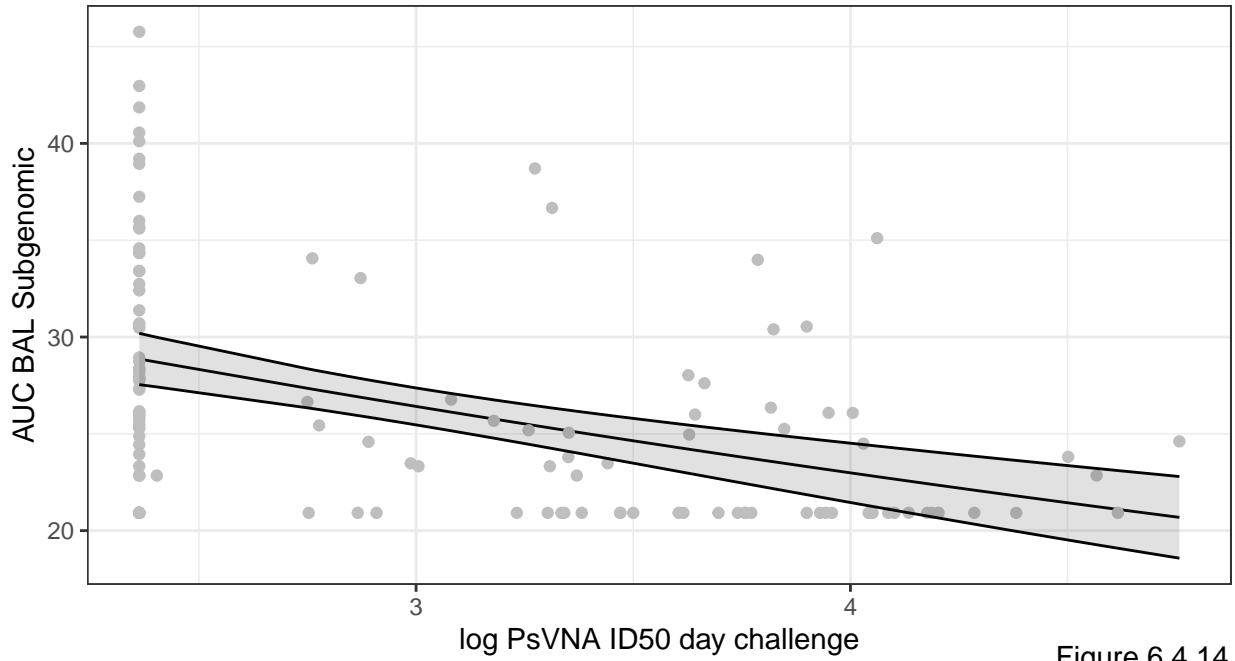

Figure 6.4.14

exp

Est. = 0.89 (0.86, 0.92),  $p < 0.001$

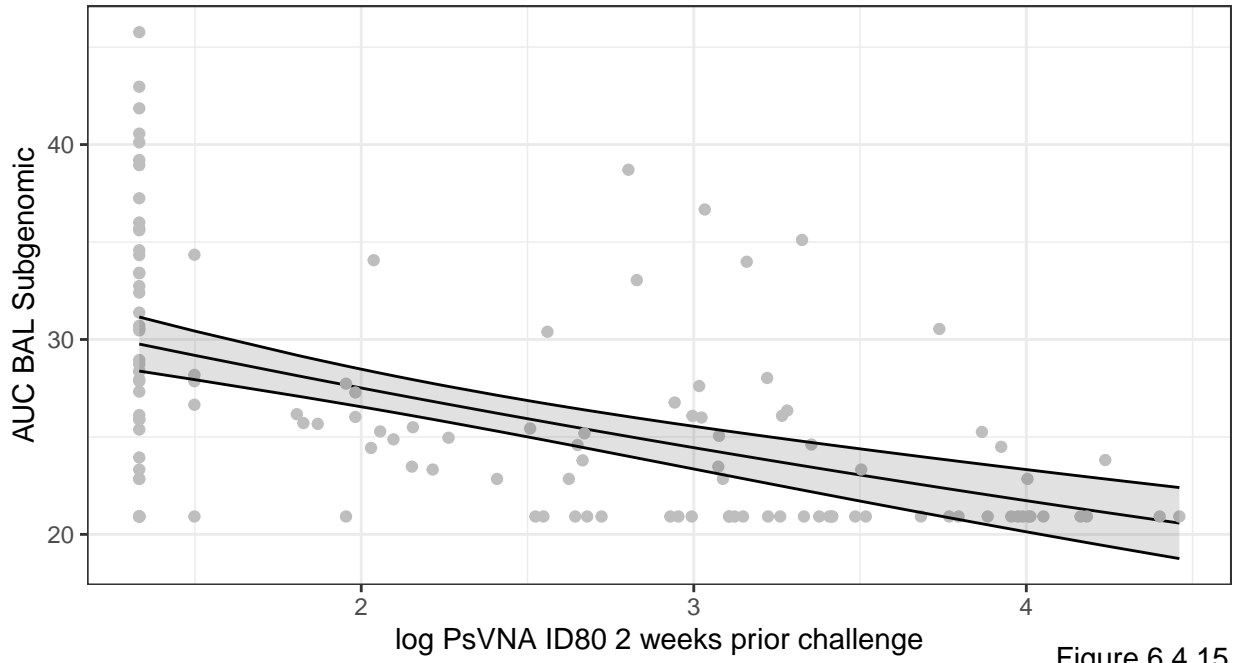

Figure 6.4.15

exp

Est. = 0.87 (0.83, 0.9),  $p < 0.001$

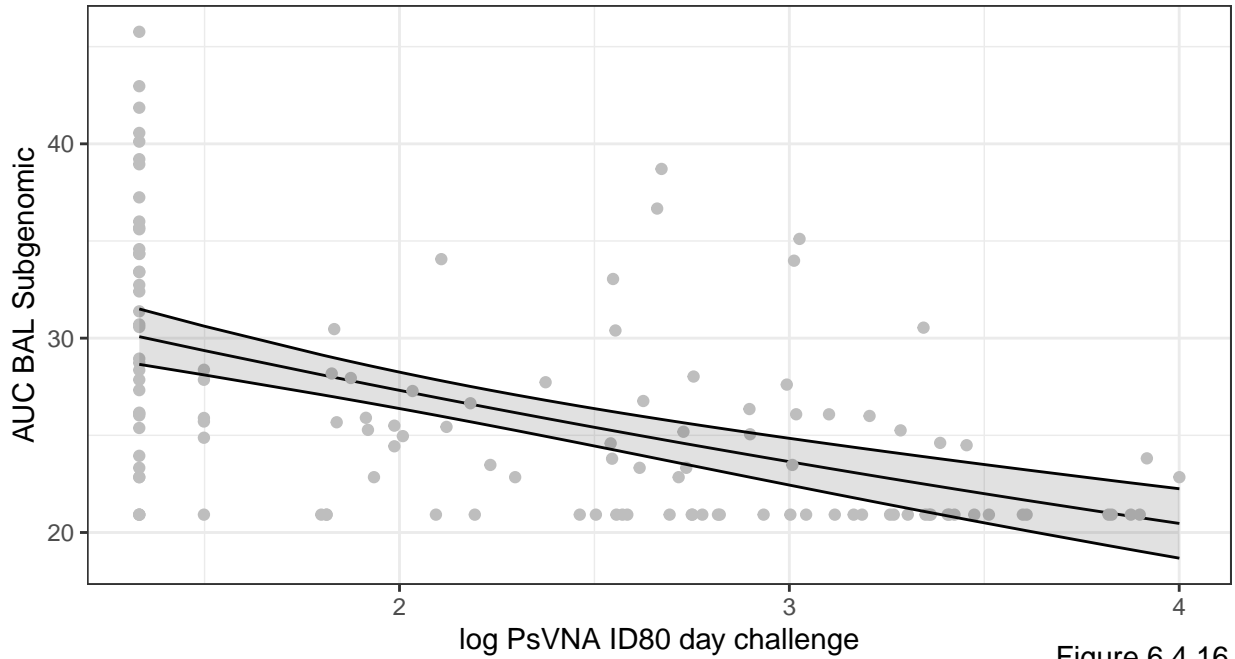

Figure 6.4.16

lm

Est. = -7.2 (-8.53, -5.87),  $p < 0.001$

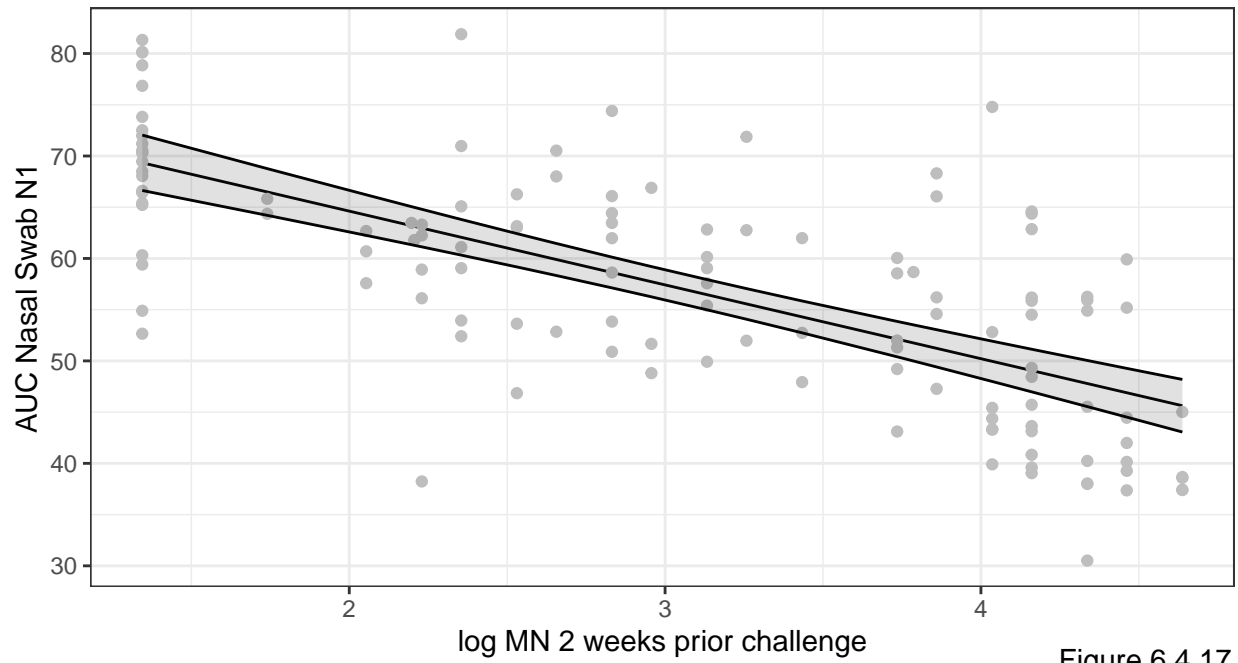

Figure 6.4.17

lm

Est. = -8.13 (-9.71, -6.54),  $p < 0.001$

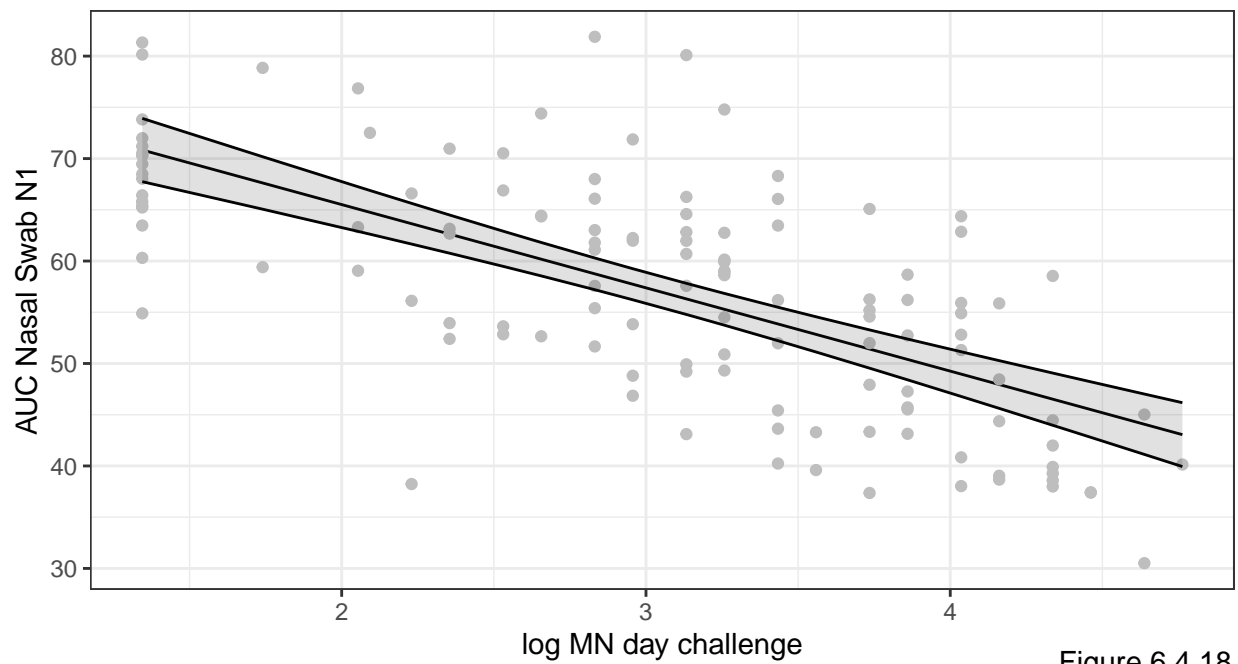

Figure 6.4.18

lm

Est. = -6.79 (-8.09, -5.5), p<0.001

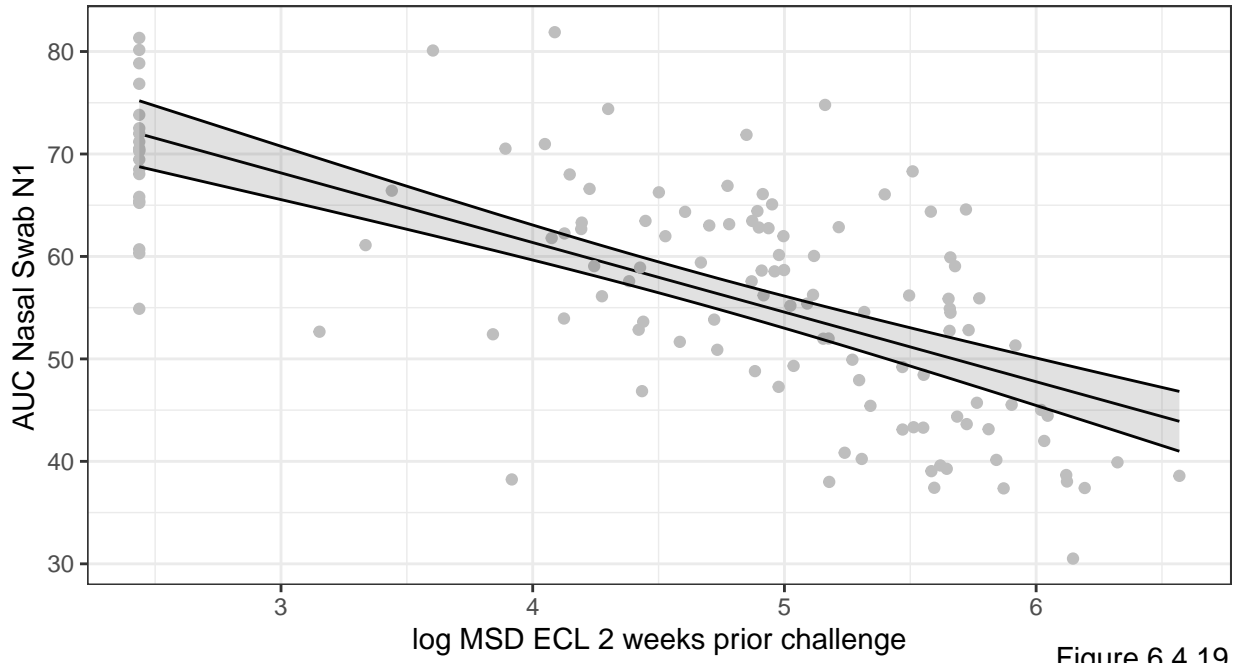

Figure 6.4.19

lm

Est. = -7.81 (-9.25, -6.36), p<0.001

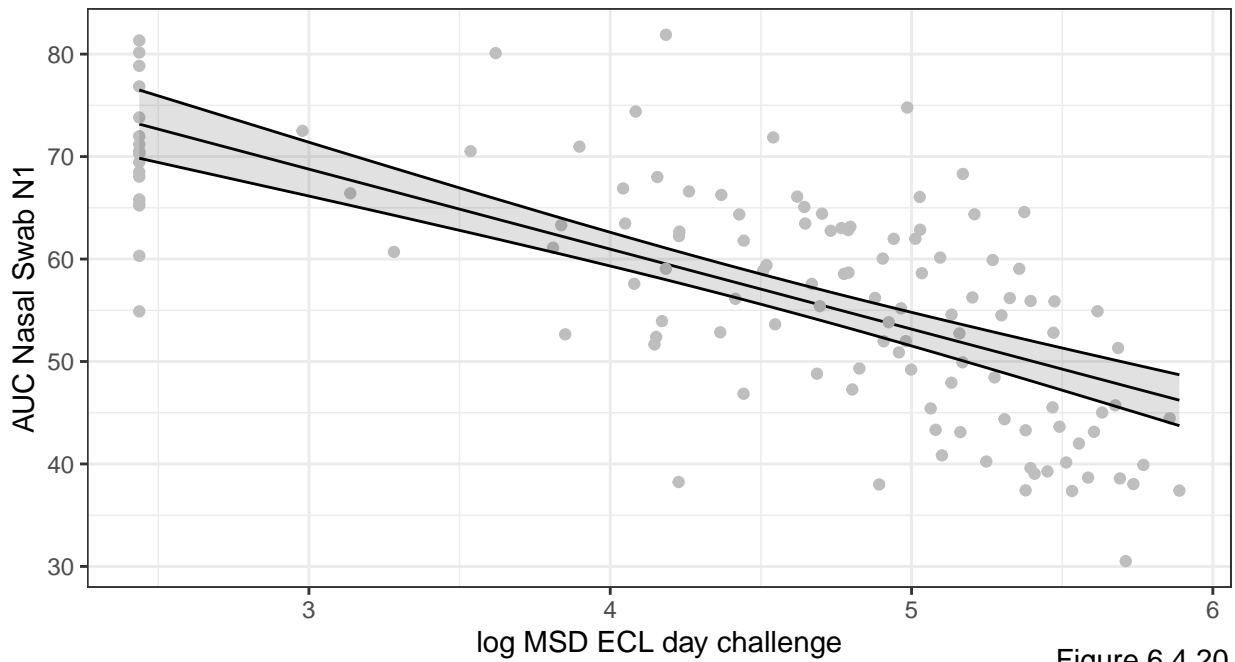

Figure 6.4.20

lm

Est. = -9.02 (-10.86, -7.18), p<0.001

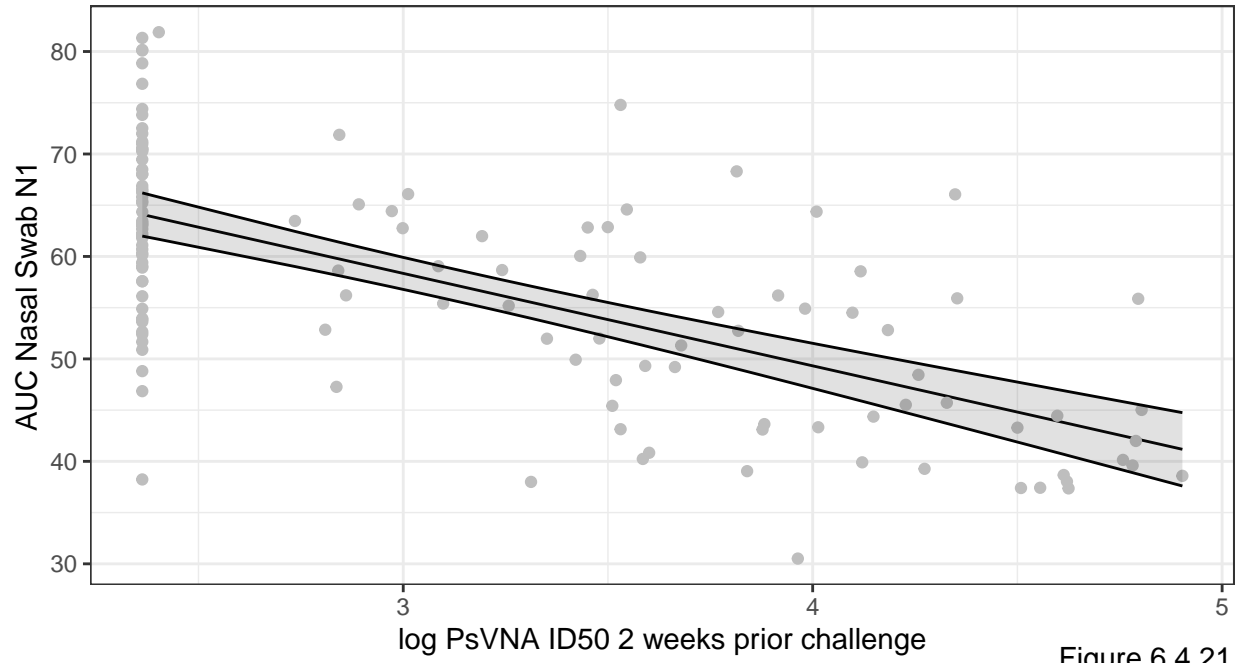

Figure 6.4.21

lm

Est. = -10.27 (-12.35, -8.18), p<0.001

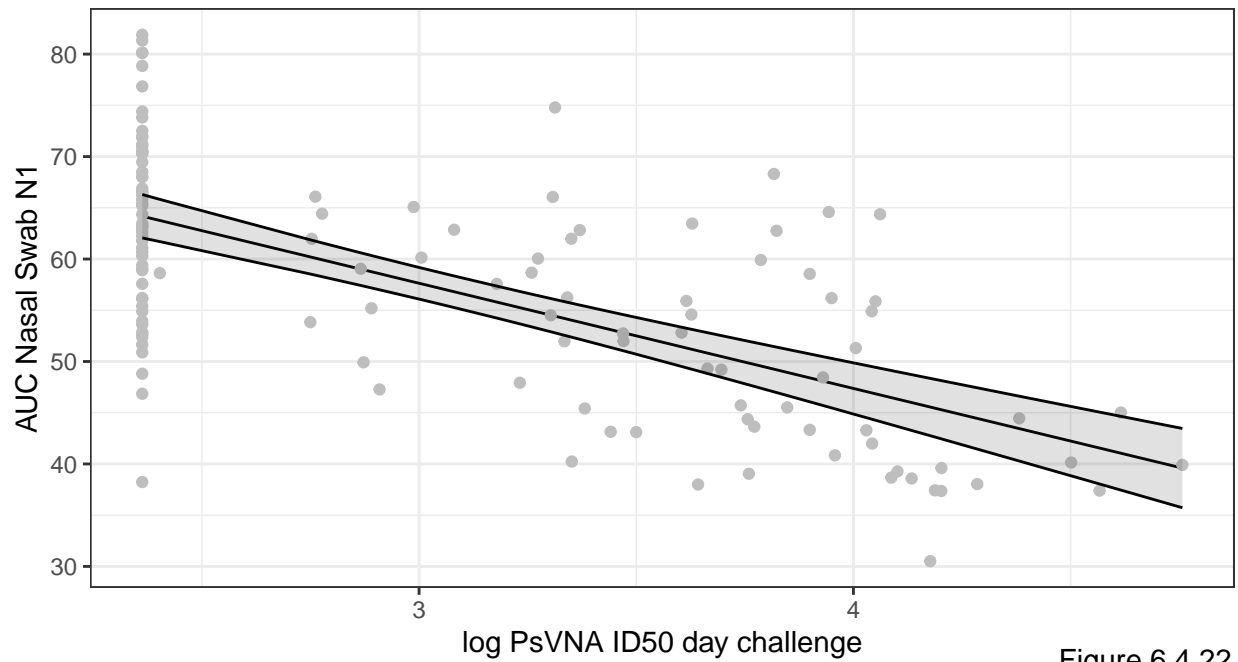

Figure 6.4.22

lm

Est. = -7.77 (-9.28, -6.26), p<0.001

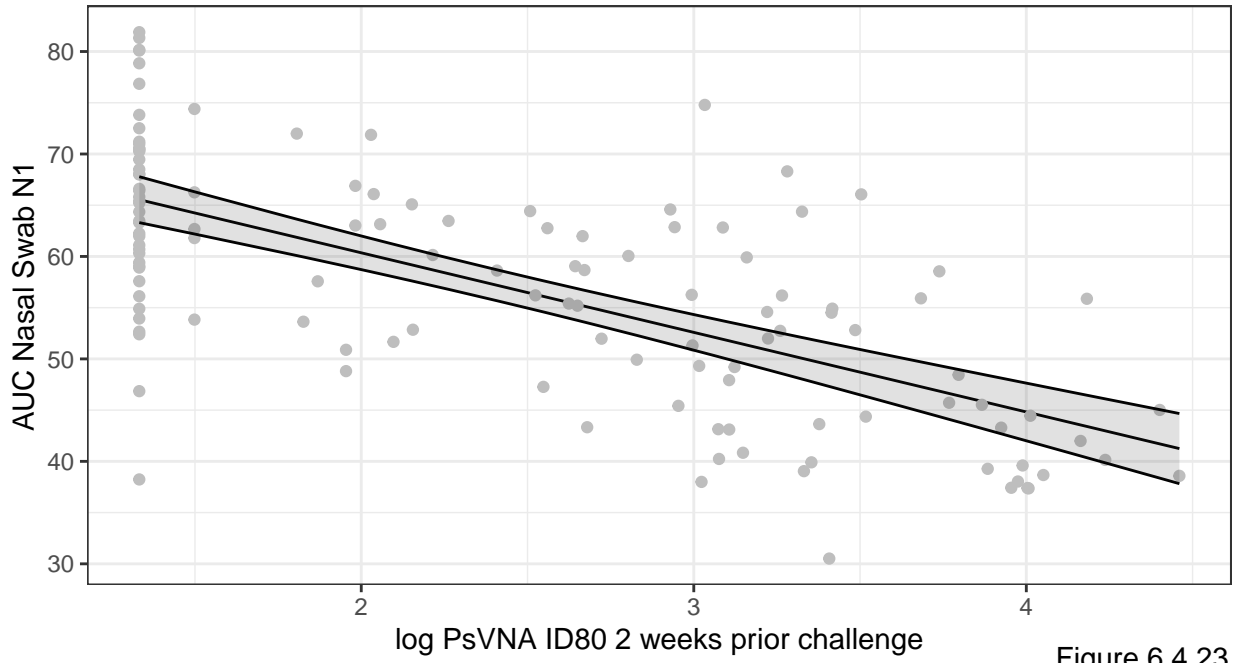

Figure 6.4.23

lm

Est. = -9.78 (-11.49, -8.07), p<0.001

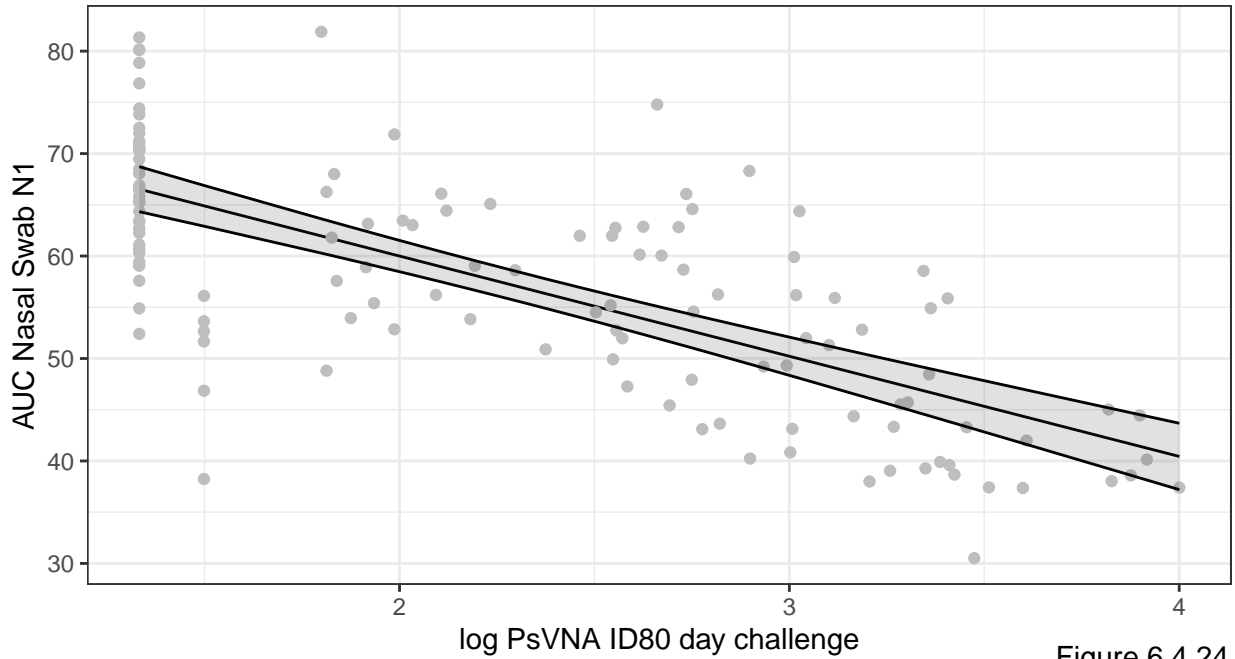

Figure 6.4.24

lm

Est. = -3.68 (-4.33, -3.03),  $p < 0.001$

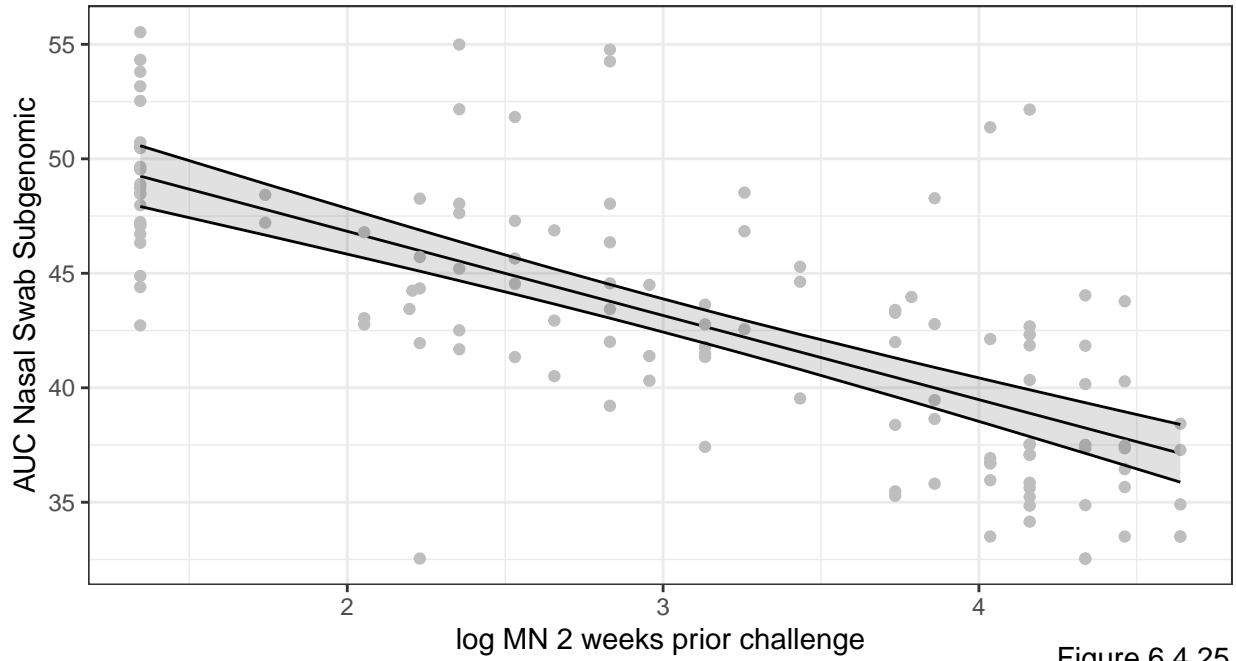

Figure 6.4.25

lm

Est. = -4.17 (-4.95, -3.39),  $p < 0.001$

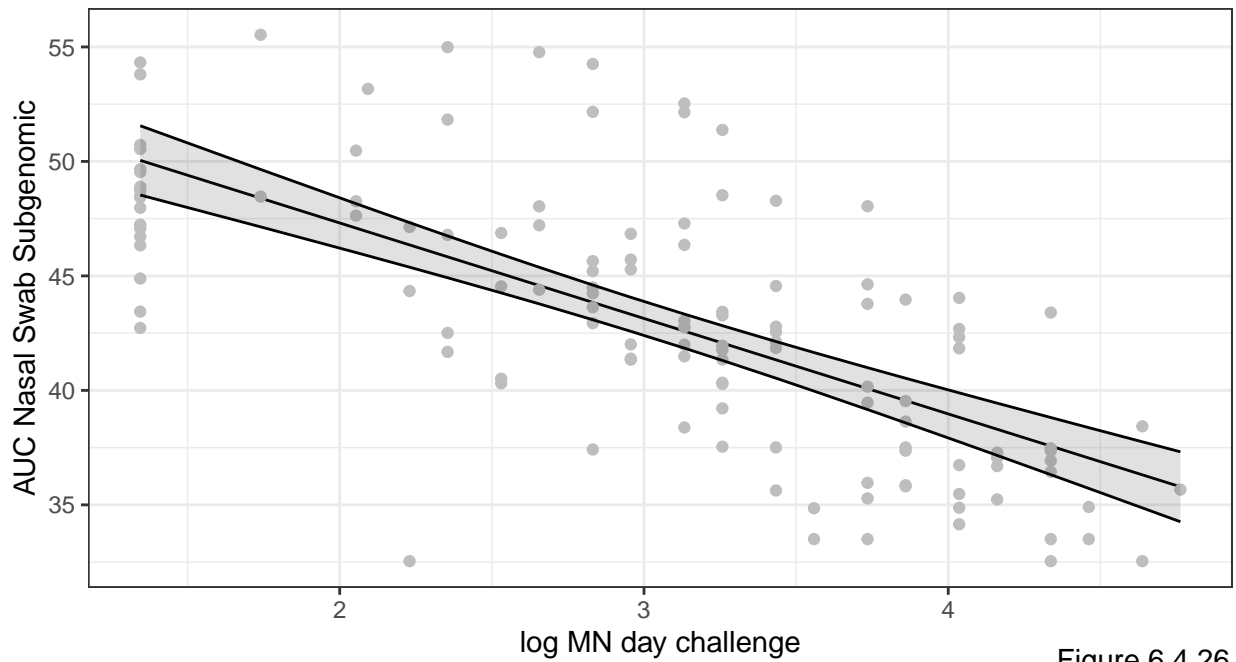

Figure 6.4.26

lm

Est. = -3.32 (-3.98, -2.66), p<0.001

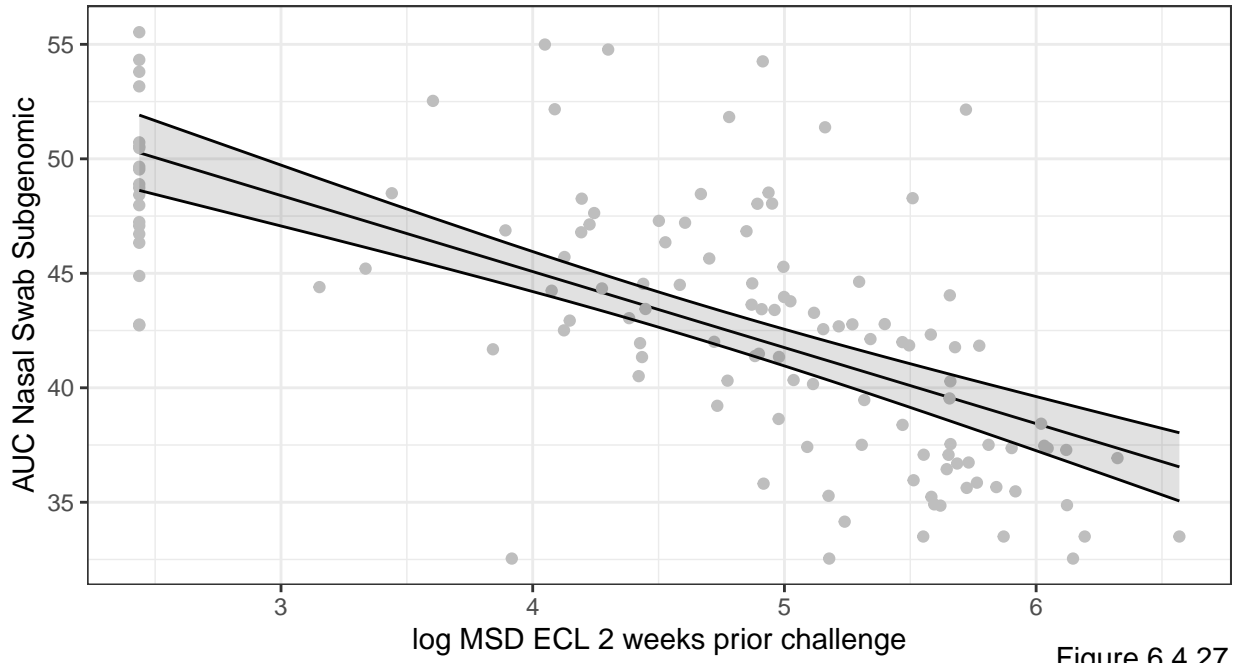

Figure 6.4.27

lm

Est. = -3.78 (-4.53, -3.04), p<0.001

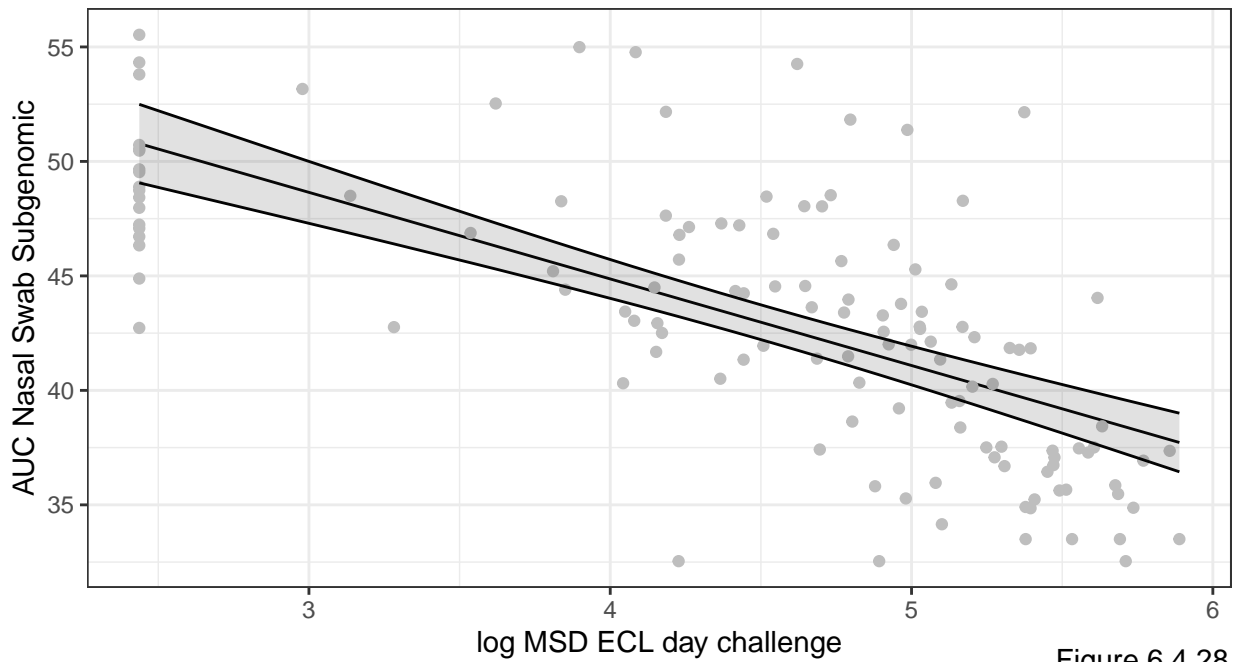

Figure 6.4.28

lm

Est. = -4.62 (-5.52, -3.71), p<0.001

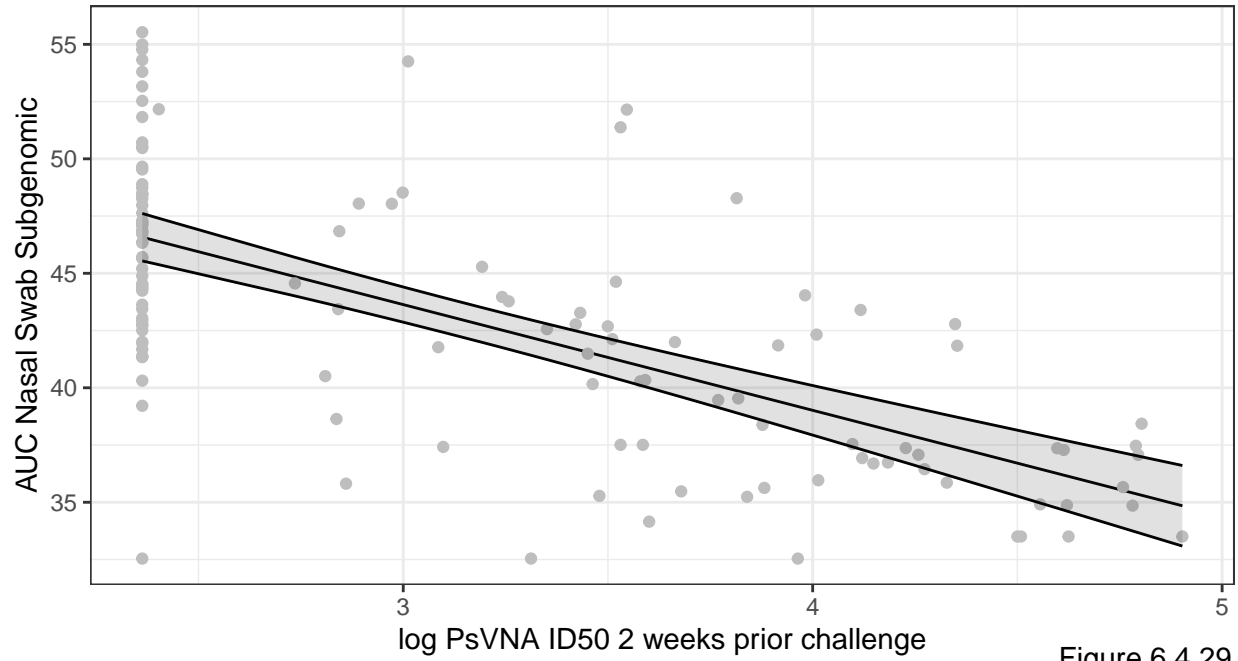

Figure 6.4.29

lm

Est. = -5.02 (-6.09, -3.96), p<0.001

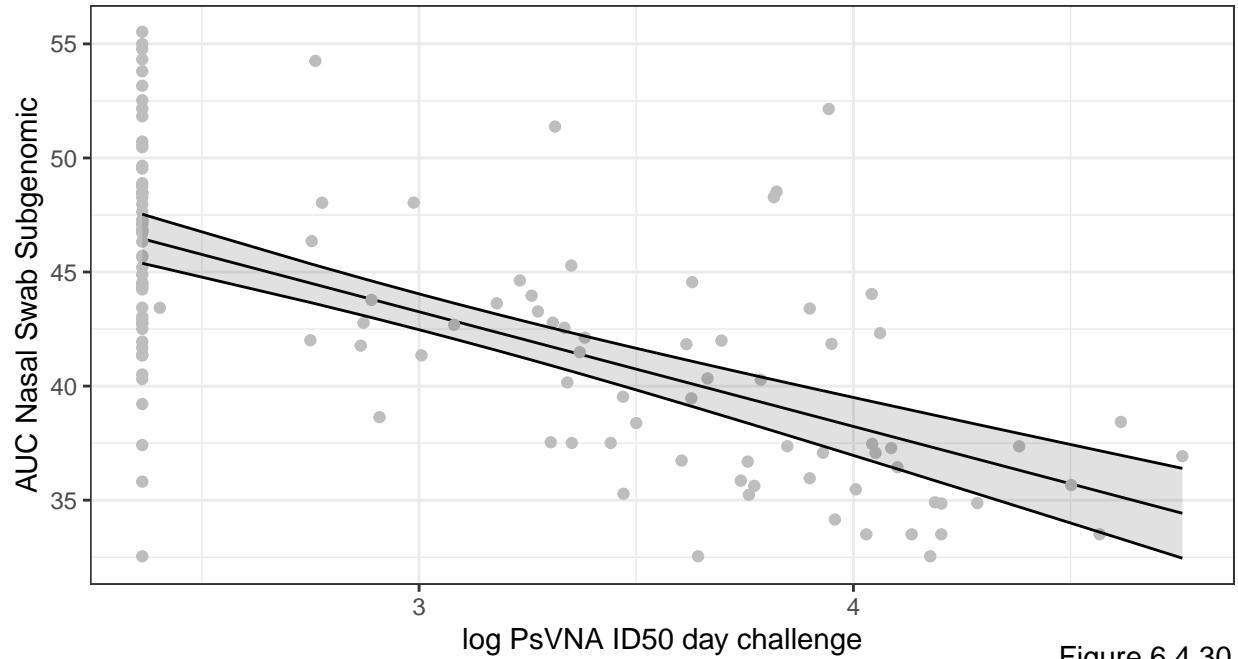

Figure 6.4.30

lm

Est. = -4 (-4.73, -3.26), p<0.001

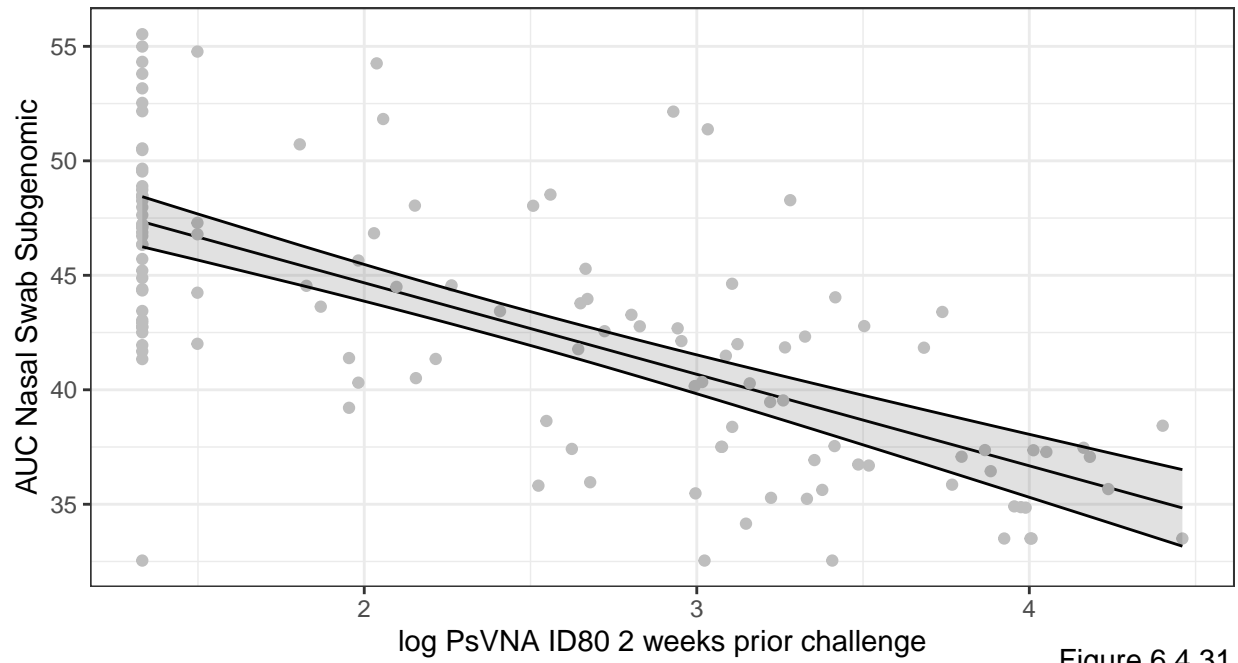

Figure 6.4.31

lm

Est. = -4.91 (-5.77, -4.06), p<0.001

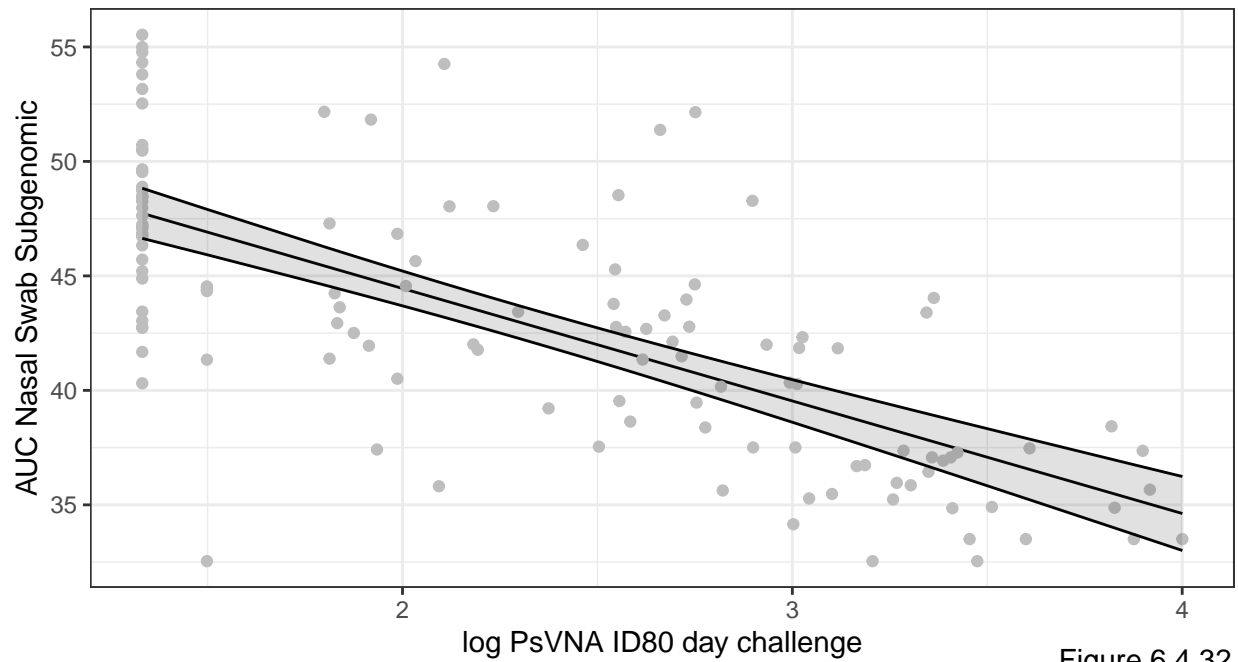

Figure 6.4.32

lm

Est. = -4.15 (-5.19, -3.11),  $p < 0.001$

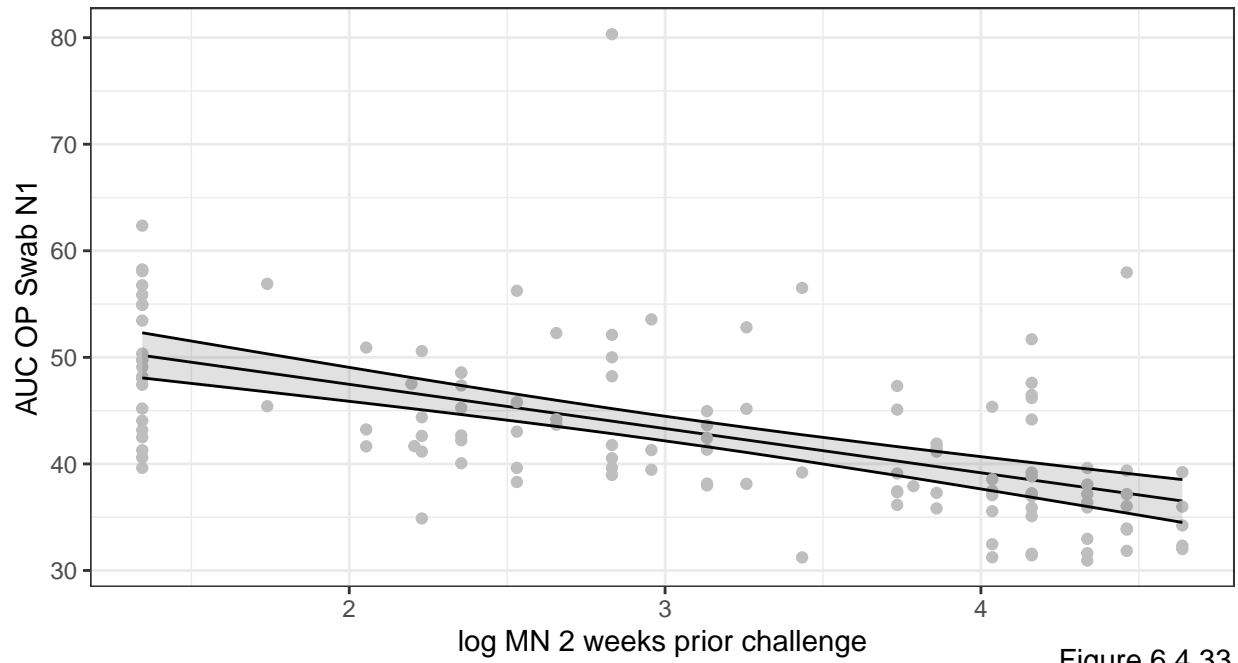

Figure 6.4.33

lm

Est. = -4.87 (-6.07, -3.66),  $p < 0.001$

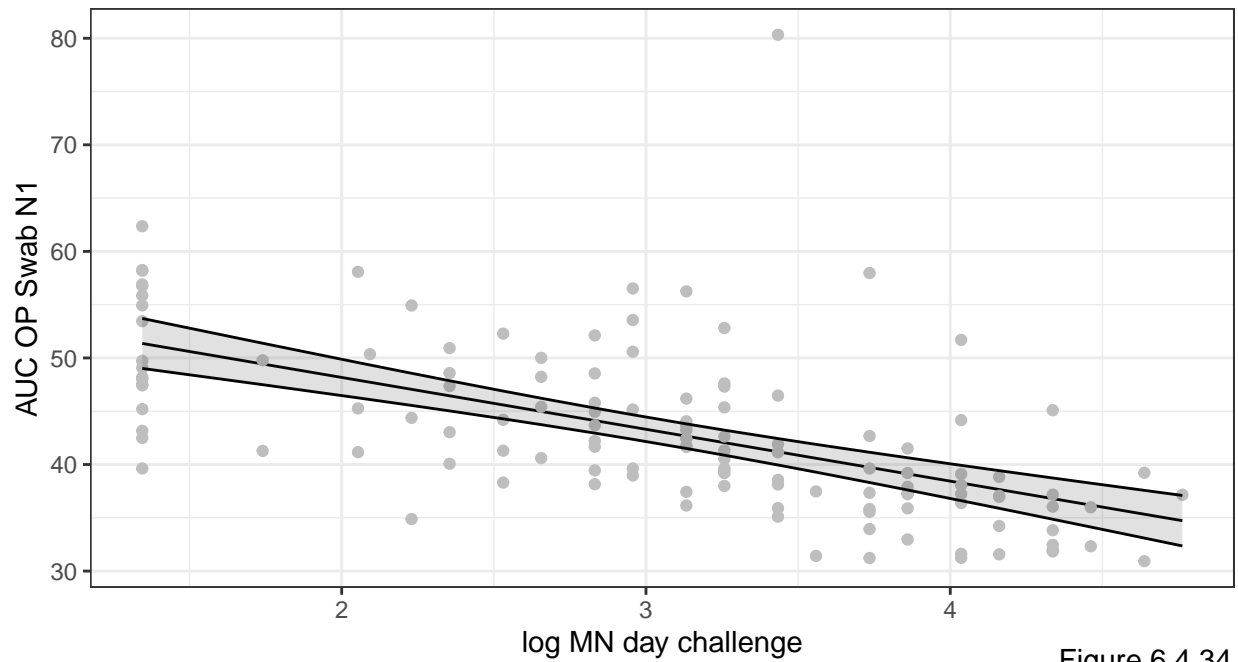

Figure 6.4.34

lm

Est. = -4.1 (-5.08, -3.11), p<0.001

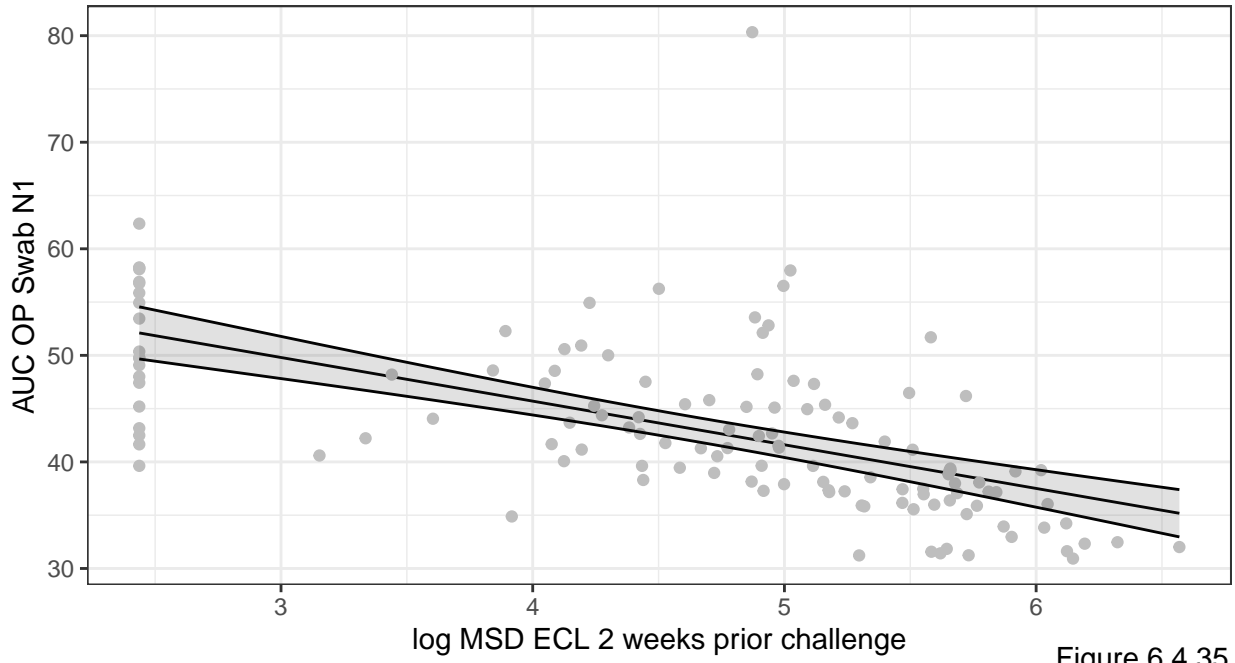

Figure 6.4.35

lm

Est. = -4.72 (-5.82, -3.62), p<0.001

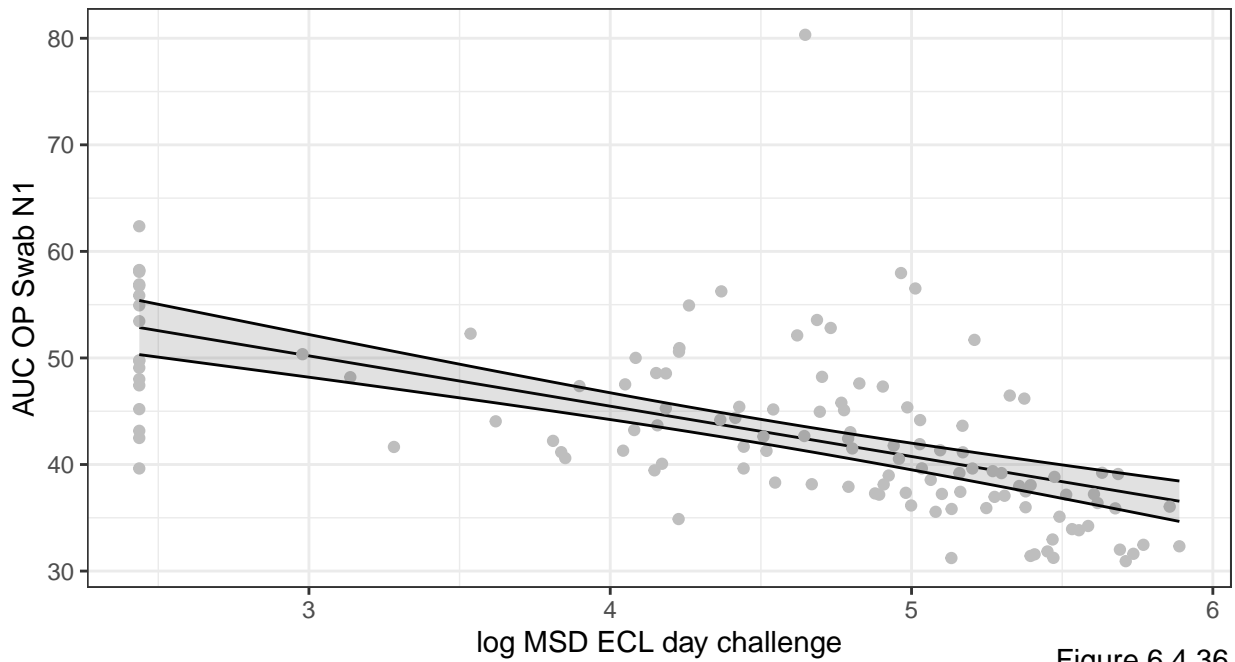

Figure 6.4.36

lm

Est. = -5.43 (-6.81, -4.04),  $p < 0.001$

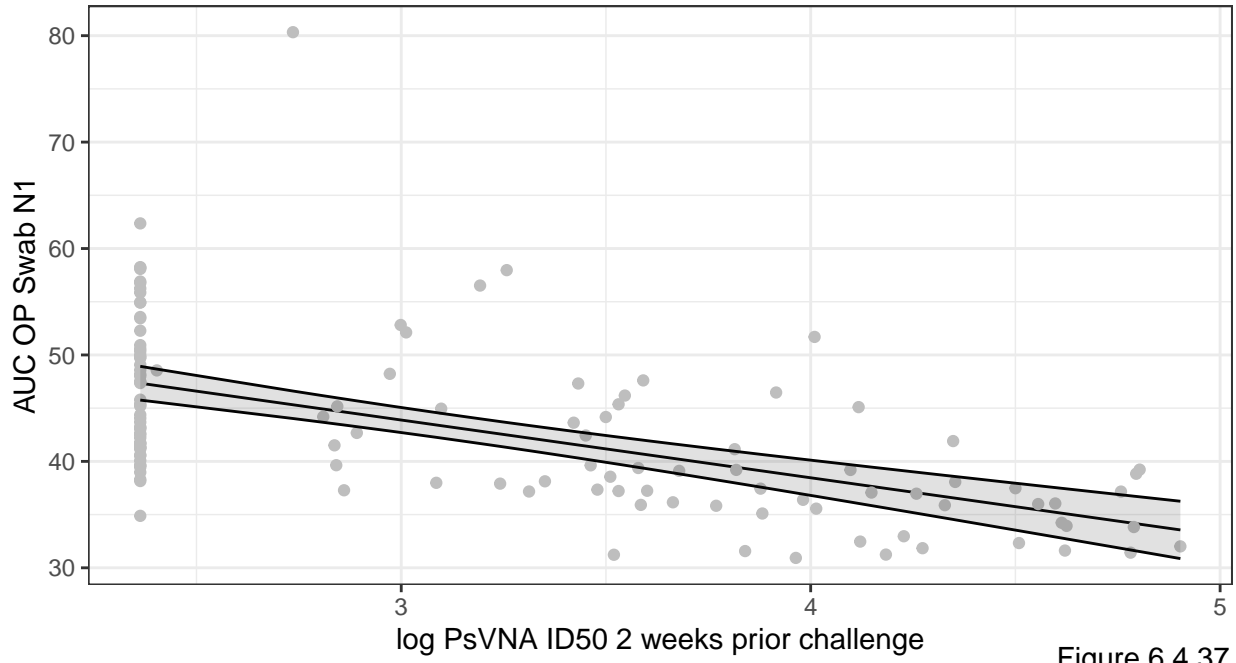

Figure 6.4.37

lm

Est. = -5.52 (-7.16, -3.87),  $p < 0.001$

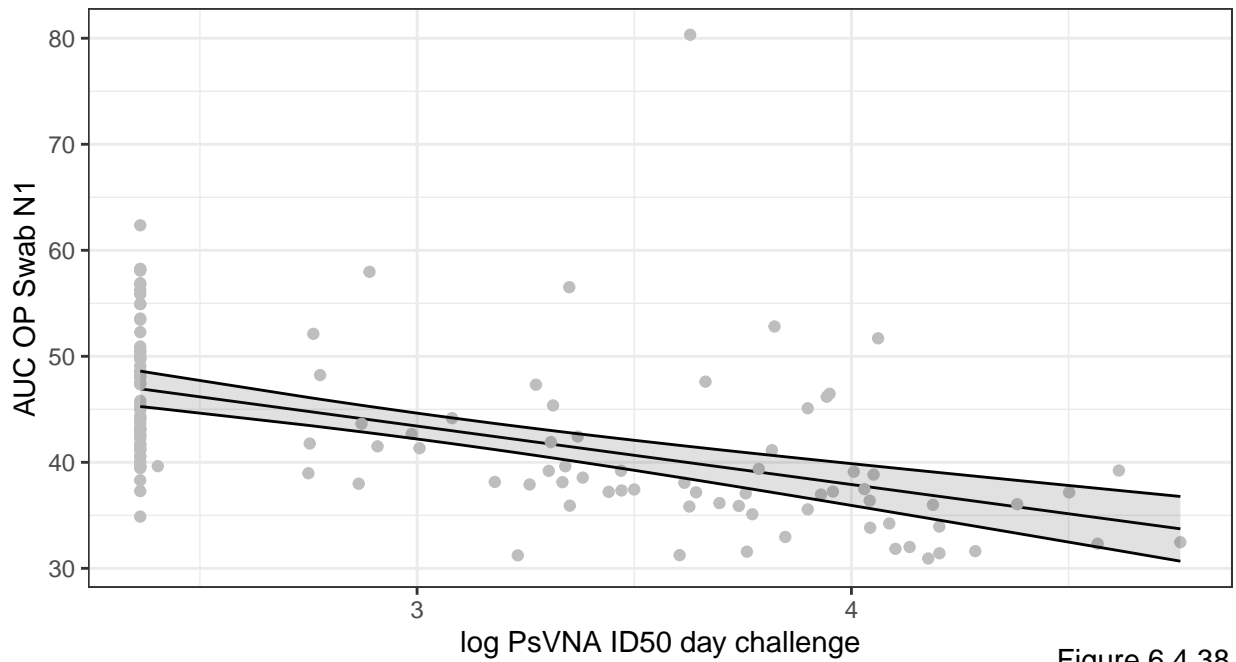

Figure 6.4.38

lm

Est. = -4.62 (-5.77, -3.46),  $p < 0.001$

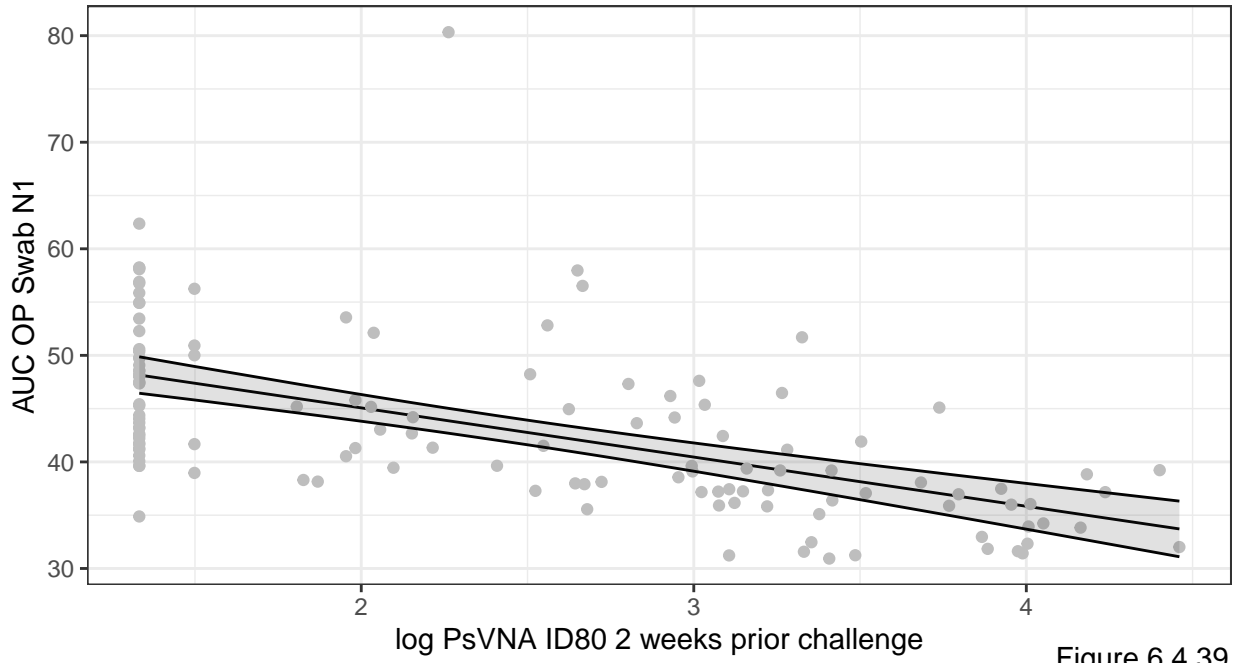

Figure 6.4.39

lm

Est. = -5.73 (-7.08, -4.39),  $p < 0.001$

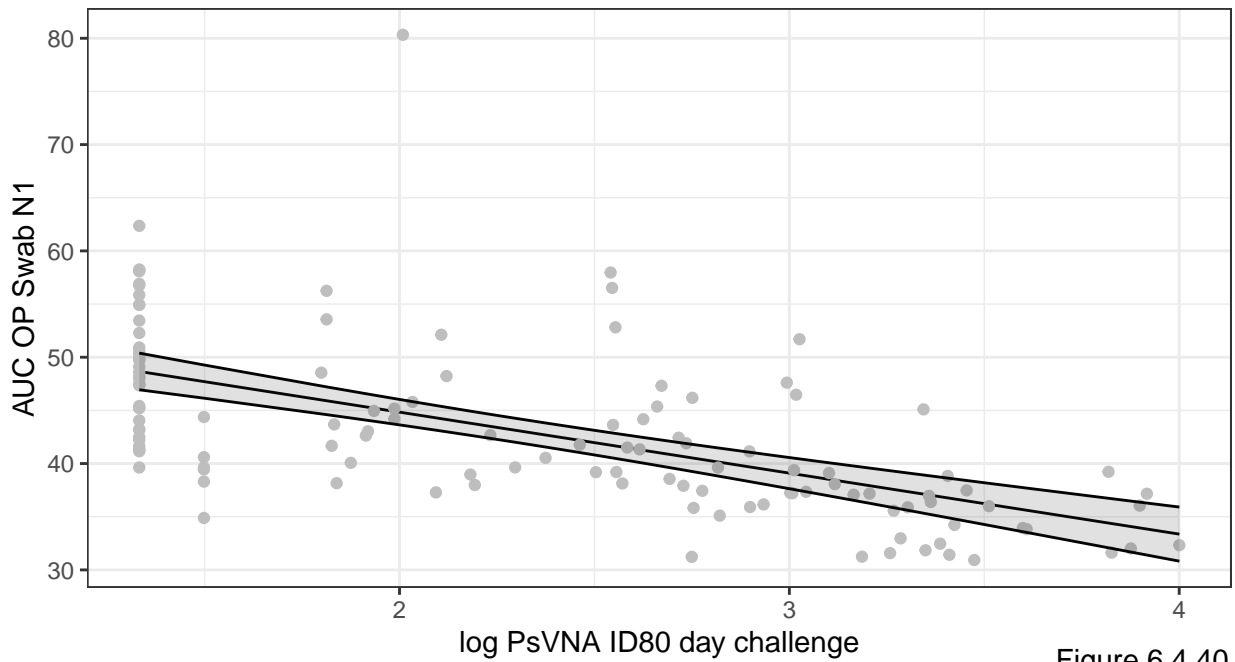

Figure 6.4.40

lm

Est. = -2.08 (-2.73, -1.43),  $p < 0.001$

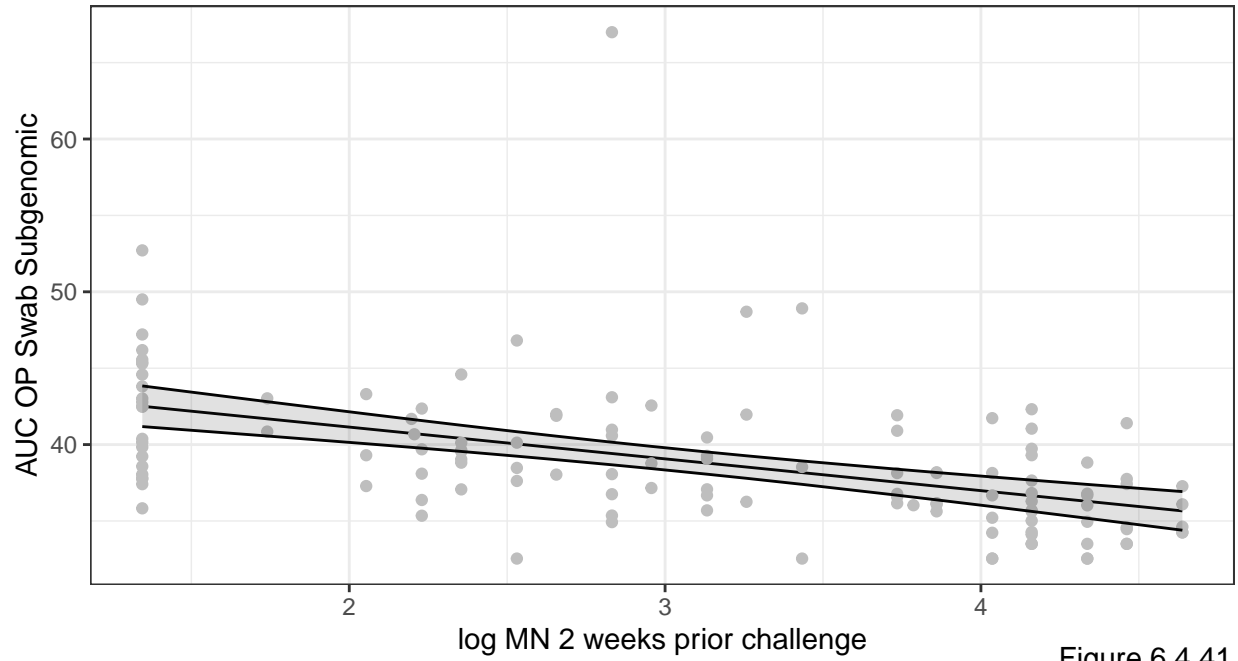

Figure 6.4.41

lm

Est. = -2.32 (-3.09, -1.55),  $p < 0.001$

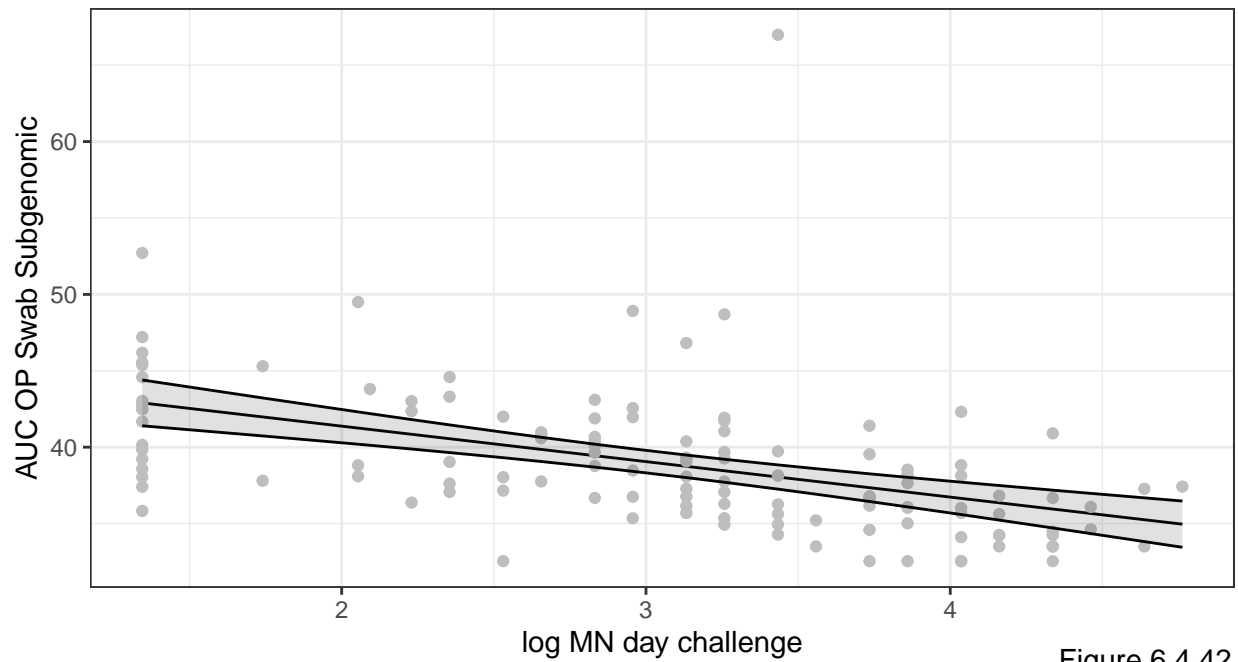

Figure 6.4.42

lm

Est. = -2 (-2.63, -1.37),  $p < 0.001$

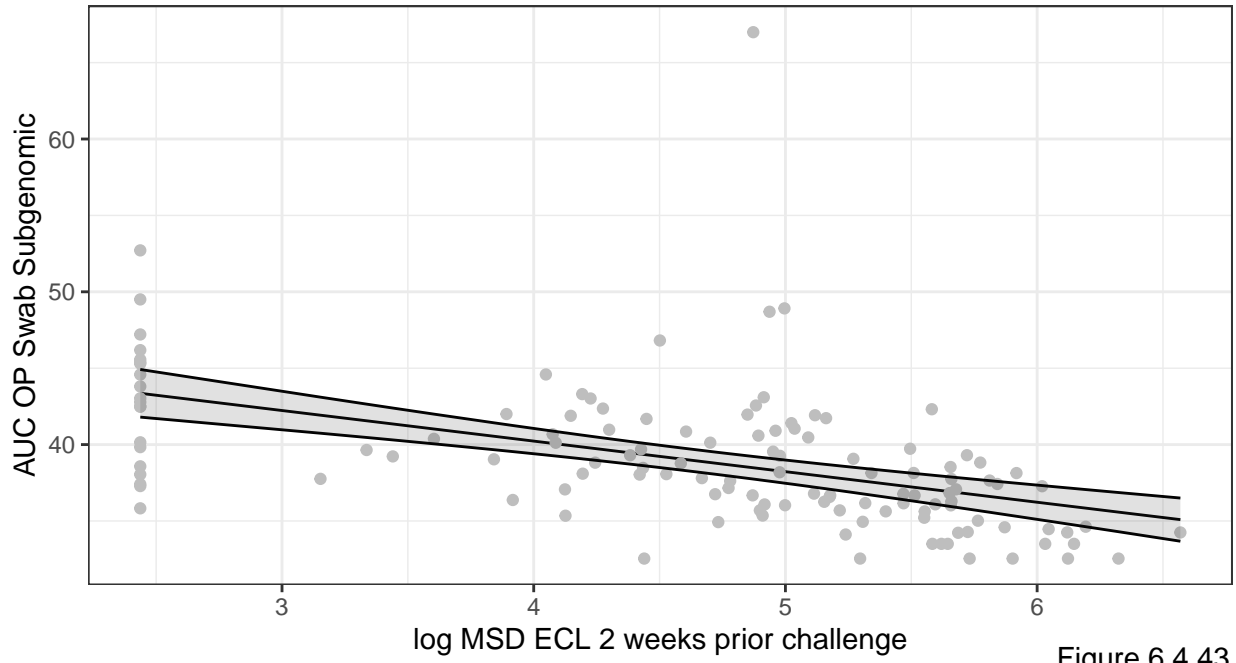

Figure 6.4.43

lm

Est. = -2.33 (-3.04, -1.63),  $p < 0.001$

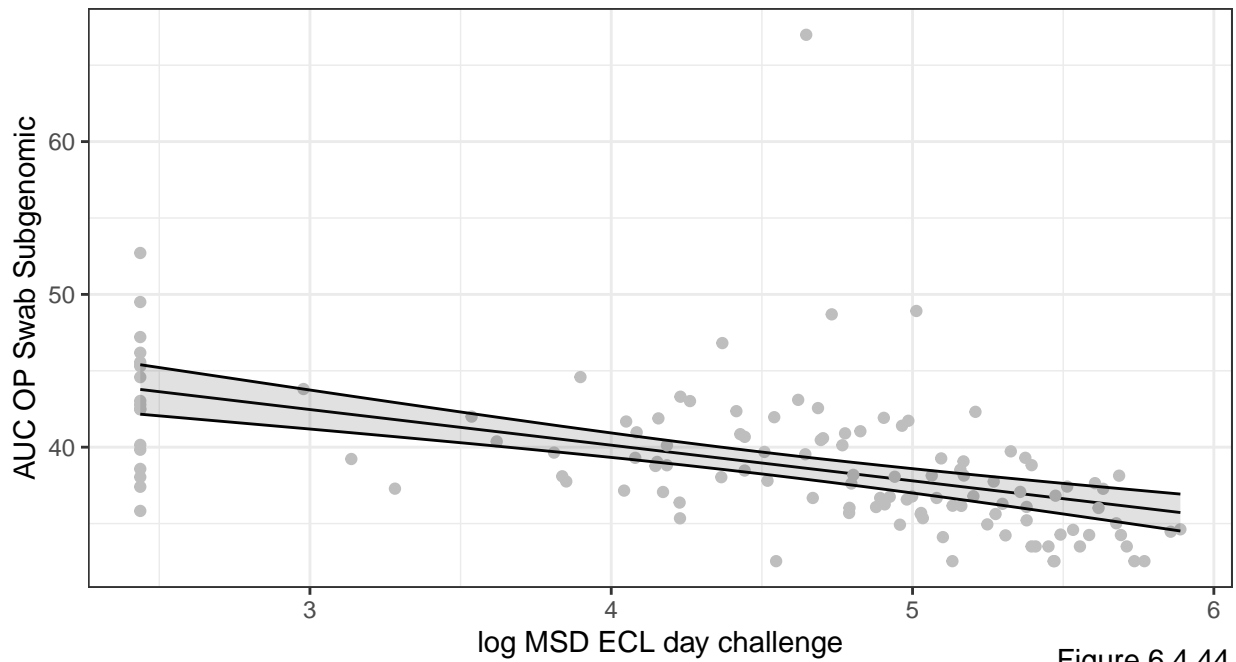

Figure 6.4.44

lm

Est. = -2.71 (-3.58, -1.84), p<0.001

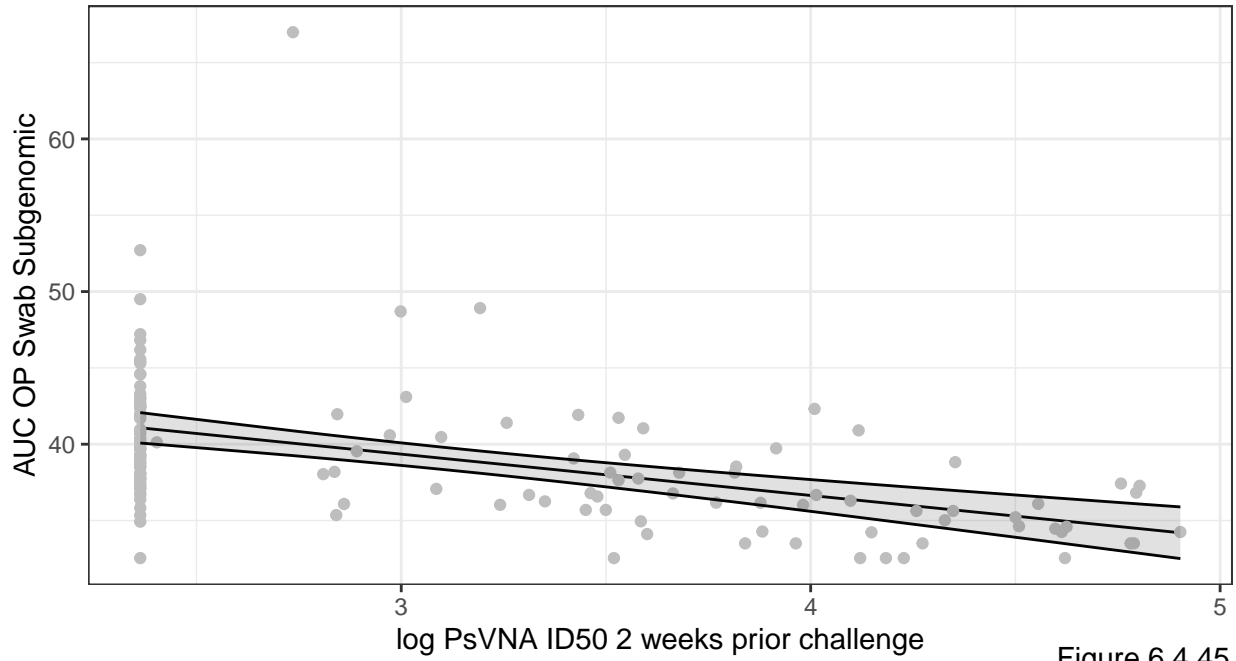

Figure 6.4.45

lm

Est. = -2.48 (-3.52, -1.43), p<0.001

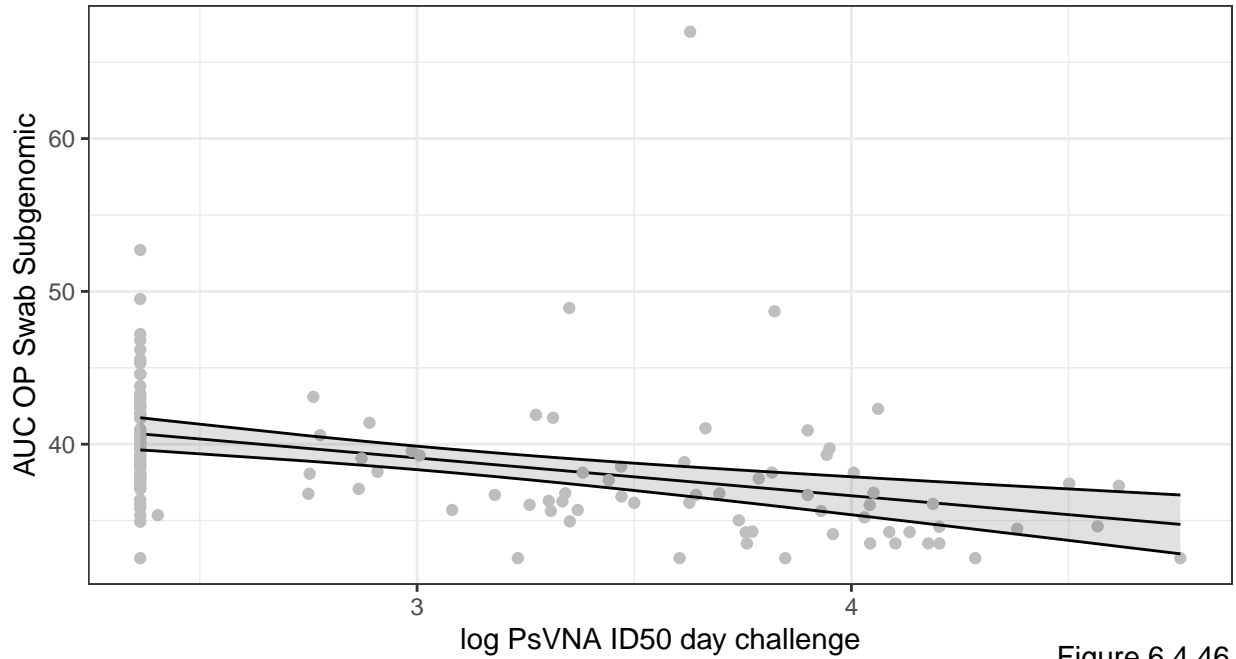

Figure 6.4.46

lm

Est. = -2.29 (-3.02, -1.56),  $p < 0.001$

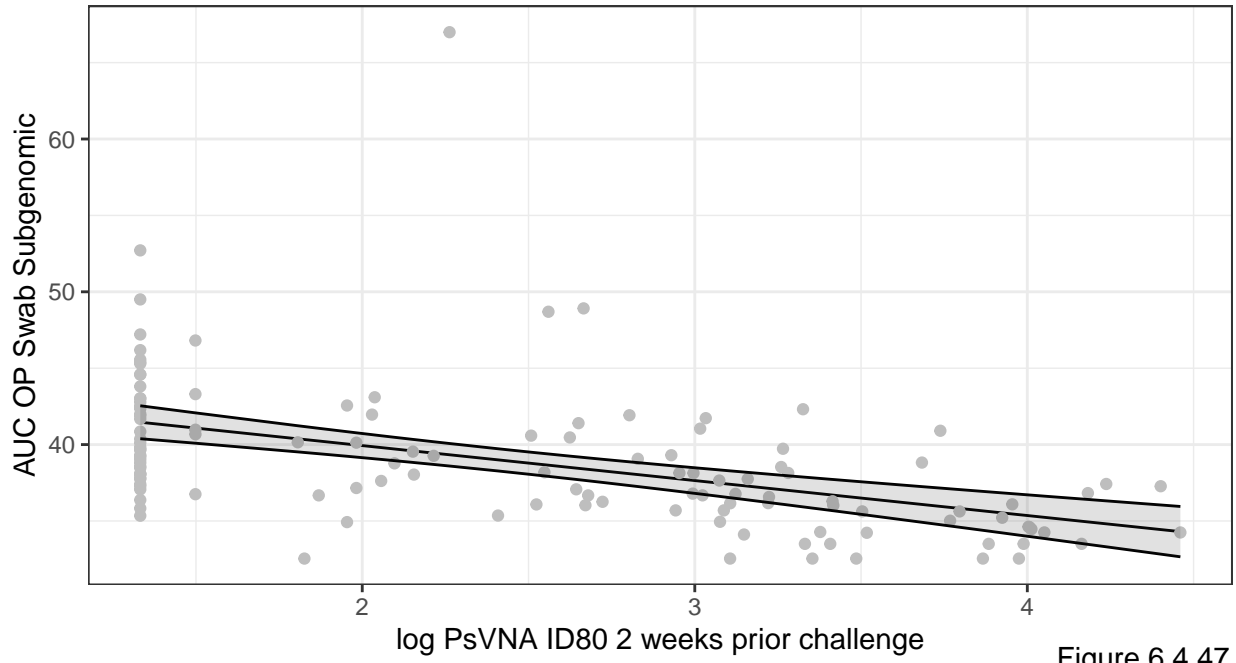

Figure 6.4.47

lm

Est. = -2.78 (-3.64, -1.91),  $p < 0.001$

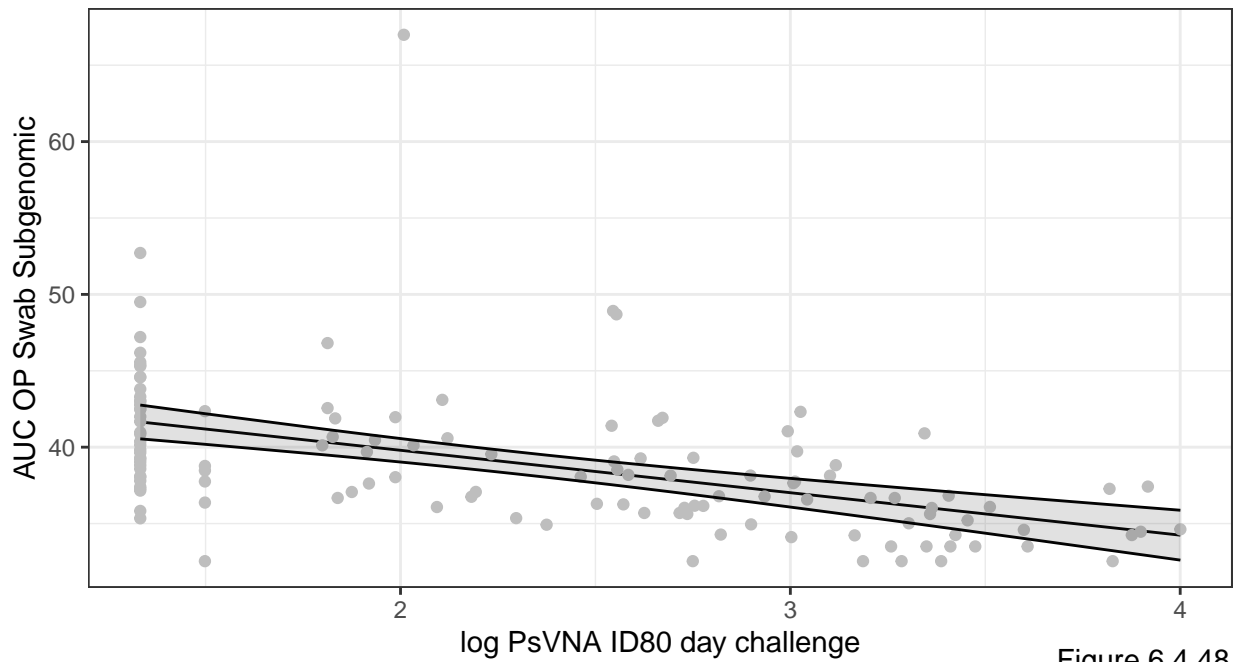

Figure 6.4.48

lm

Est. = -0.66 (-0.86, -0.45), p<0.001

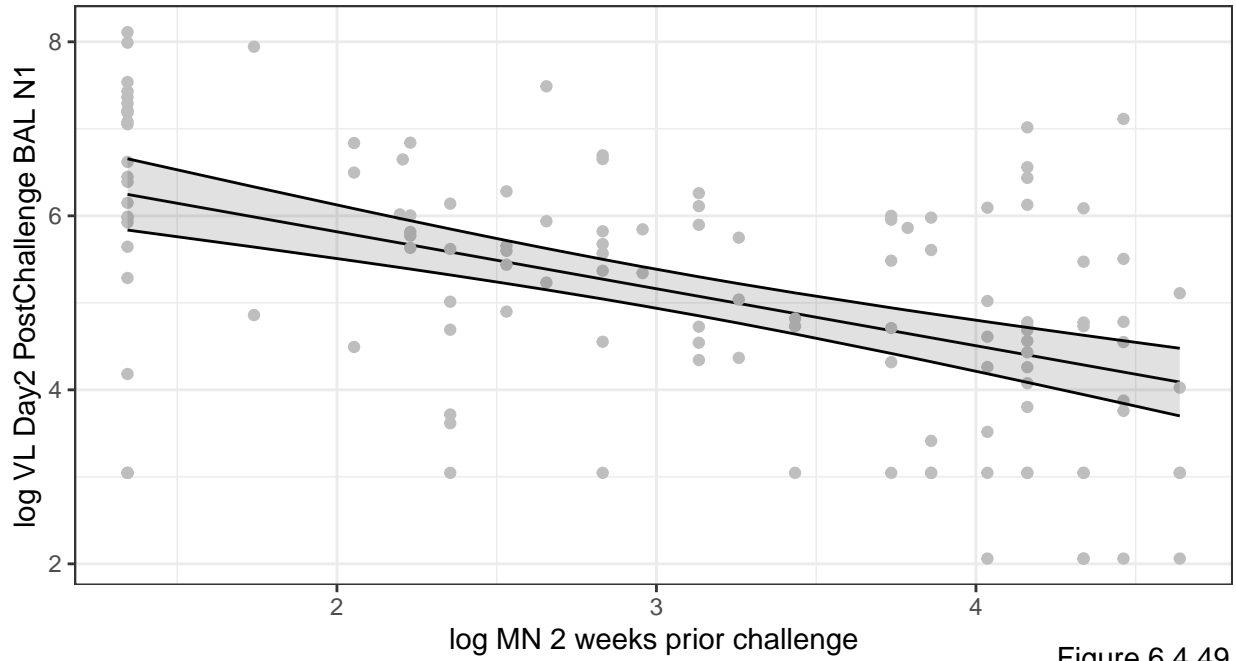

Figure 6.4.49

lm

Est. = -0.89 (-1.11, -0.67), p<0.001

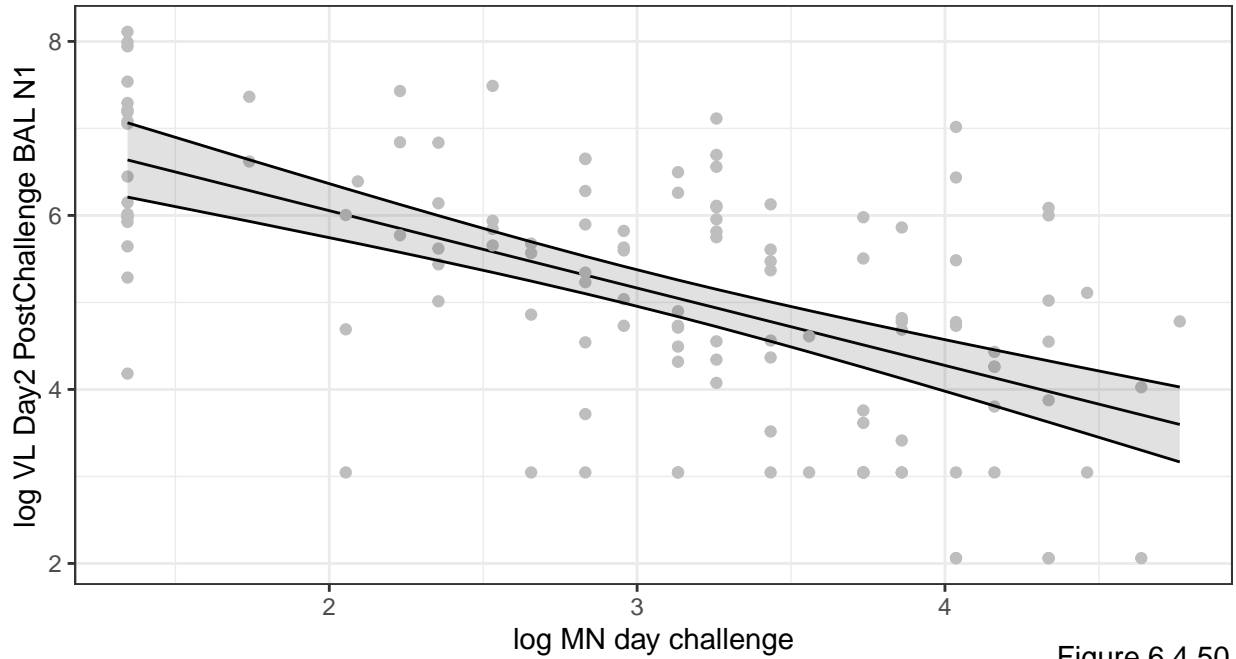

Figure 6.4.50

lm

Est. = -0.61 (-0.81, -0.42), p<0.001

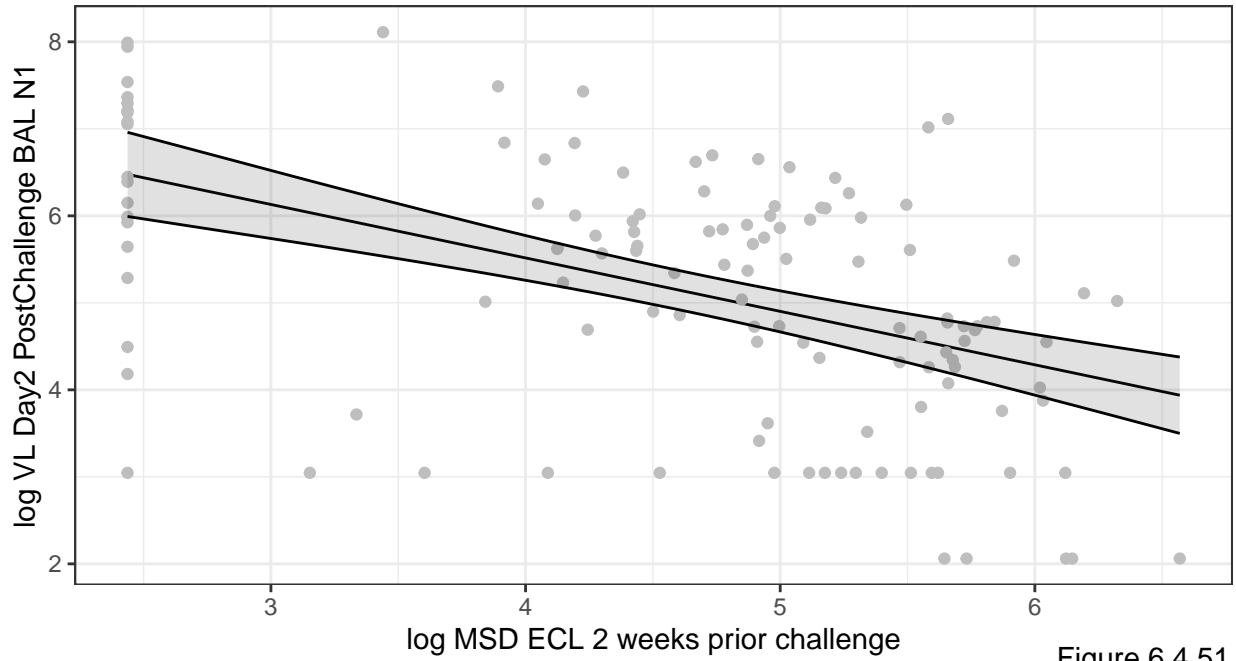

Figure 6.4.51

lm

Est. = -0.72 (-0.93, -0.5), p<0.001

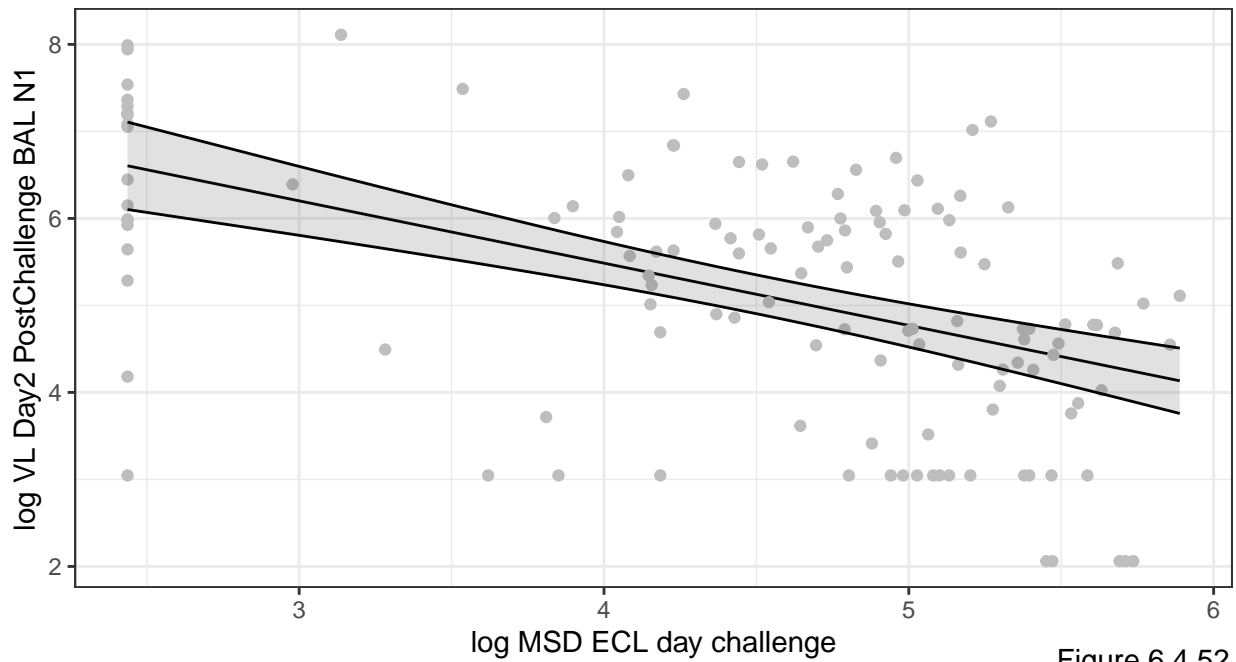

Figure 6.4.52

lm

Est. = -0.9 (-1.16, -0.64),  $p < 0.001$

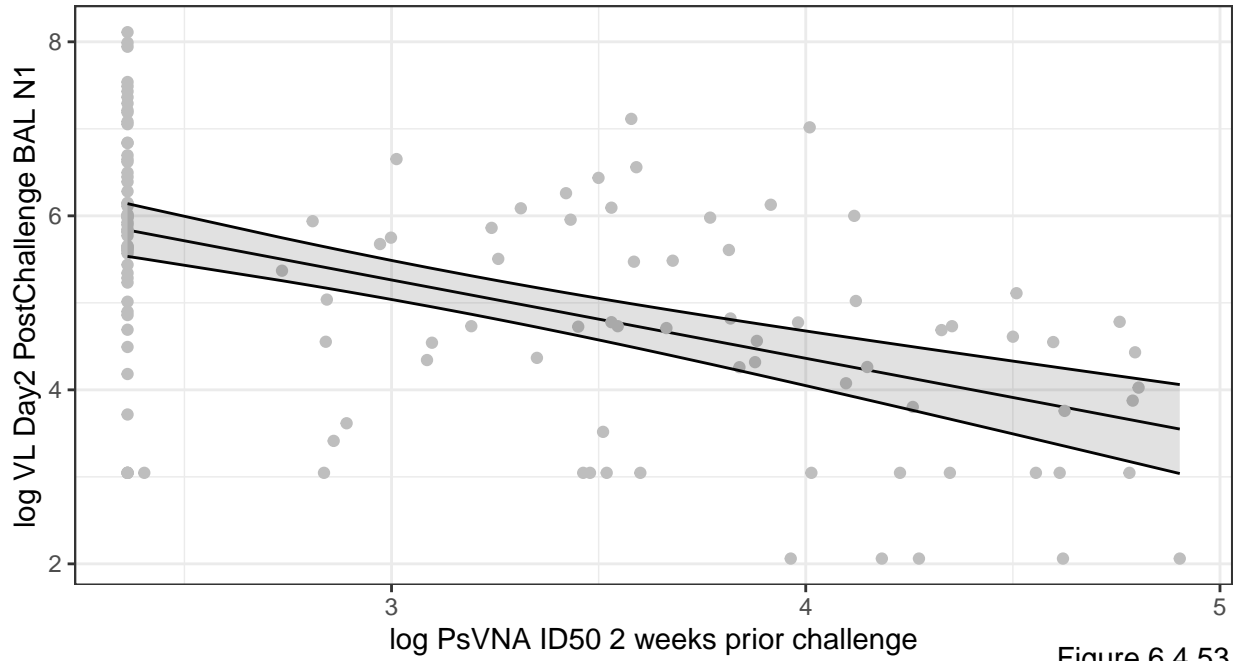

Figure 6.4.53

exp

Est. = 0.83 (0.78, 0.89),  $p < 0.001$

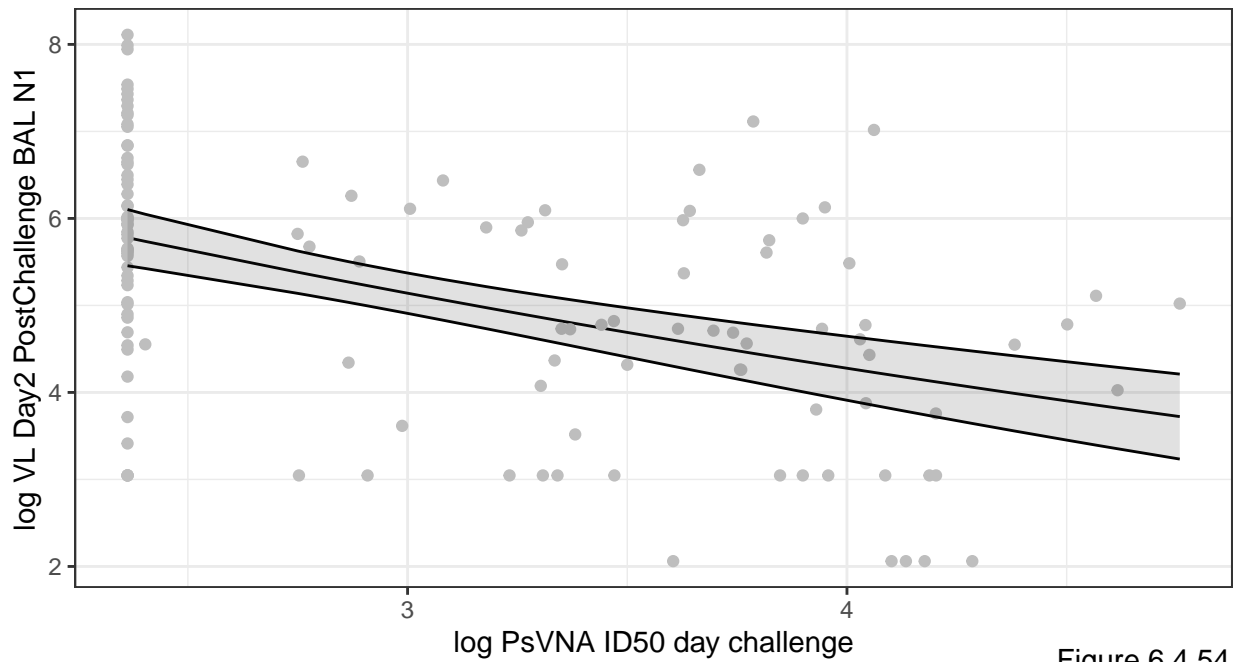

Figure 6.4.54

lm

Est. = -0.75 (-0.97, -0.52), p<0.001

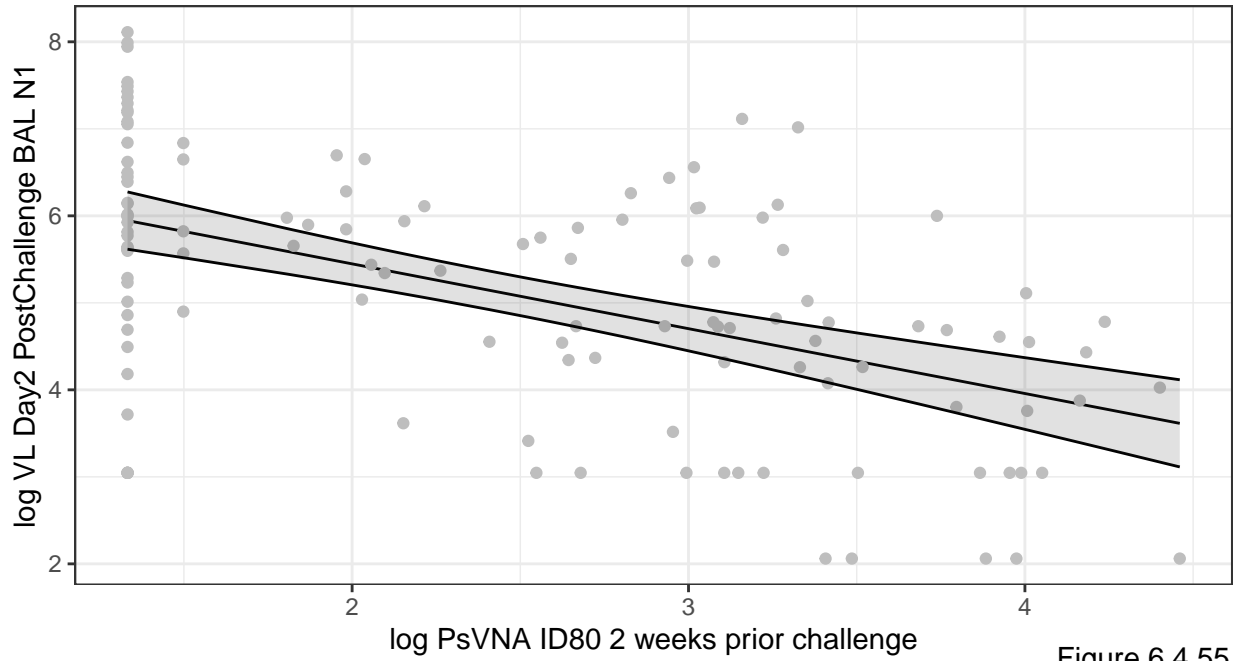

Figure 6.4.55

lm

Est. = -0.9 (-1.16, -0.64), p<0.001

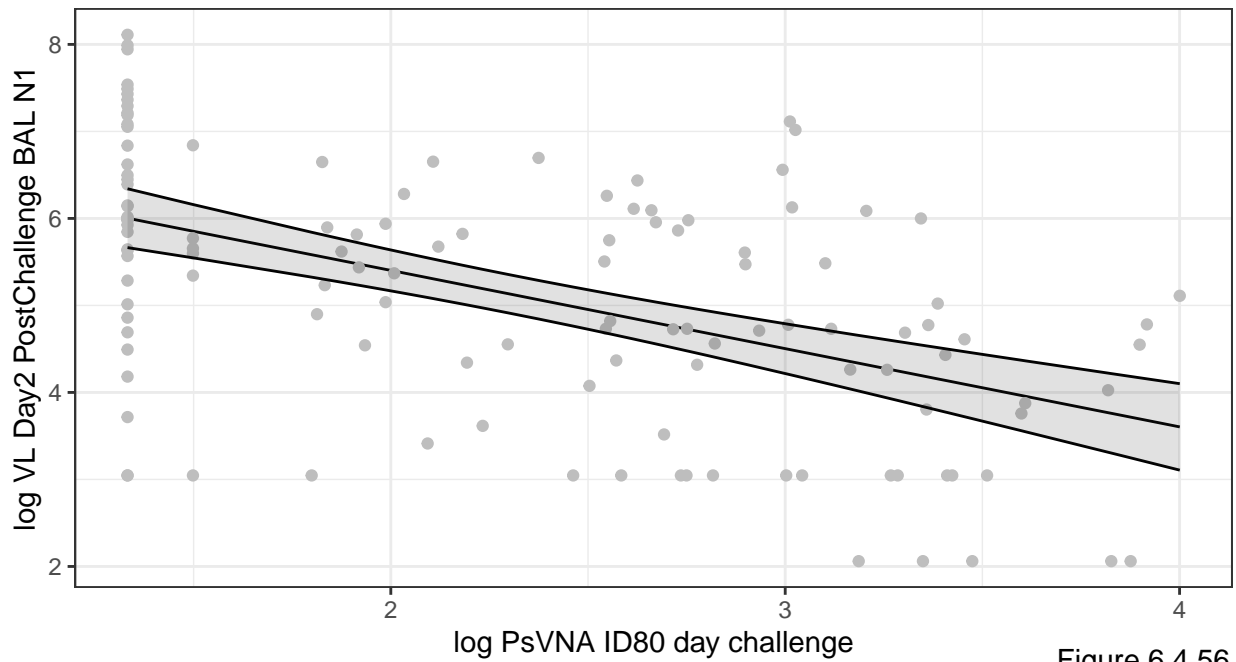

Figure 6.4.56

lm

Est. = -0.69 (-0.89, -0.49), p<0.001

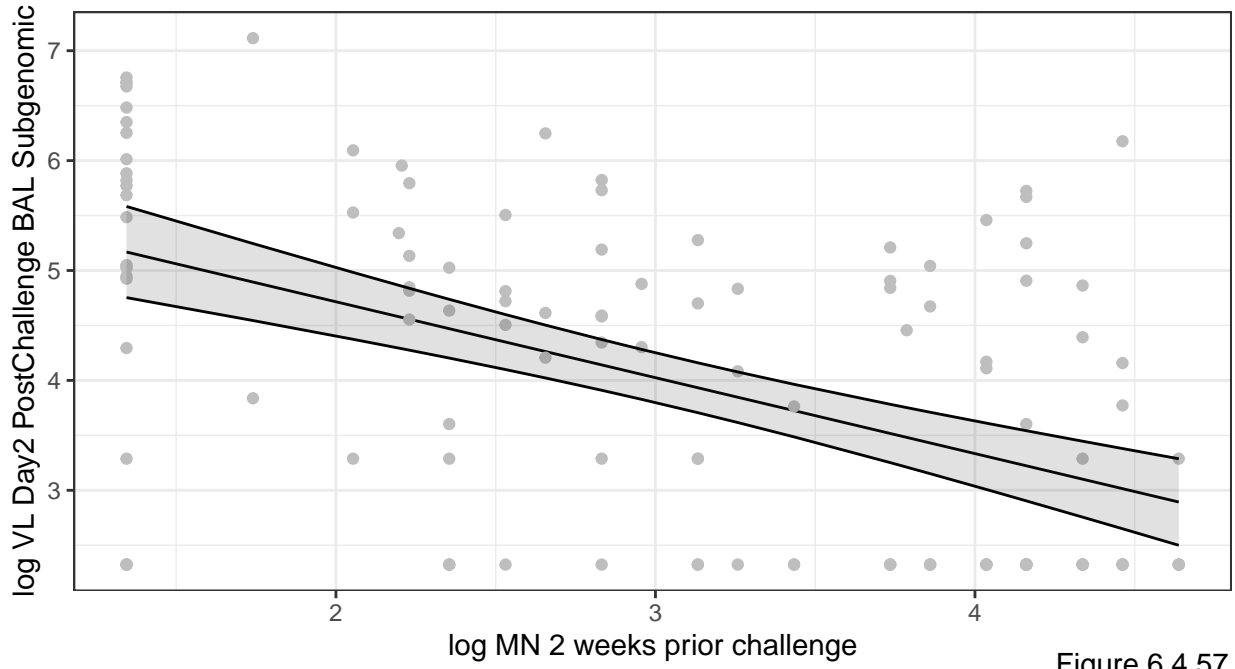

Figure 6.4.57

lm

Est. = -0.89 (-1.12, -0.67), p<0.001

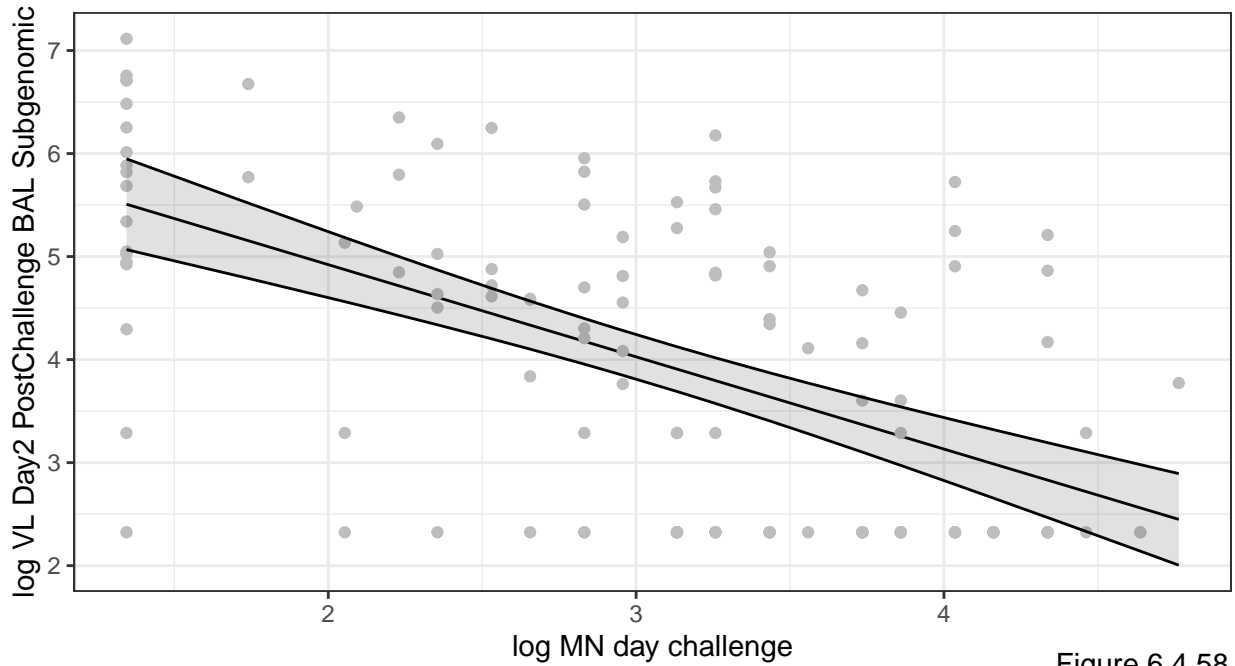

Figure 6.4.58

lm

Est. = -0.64 (-0.84, -0.44), p<0.001

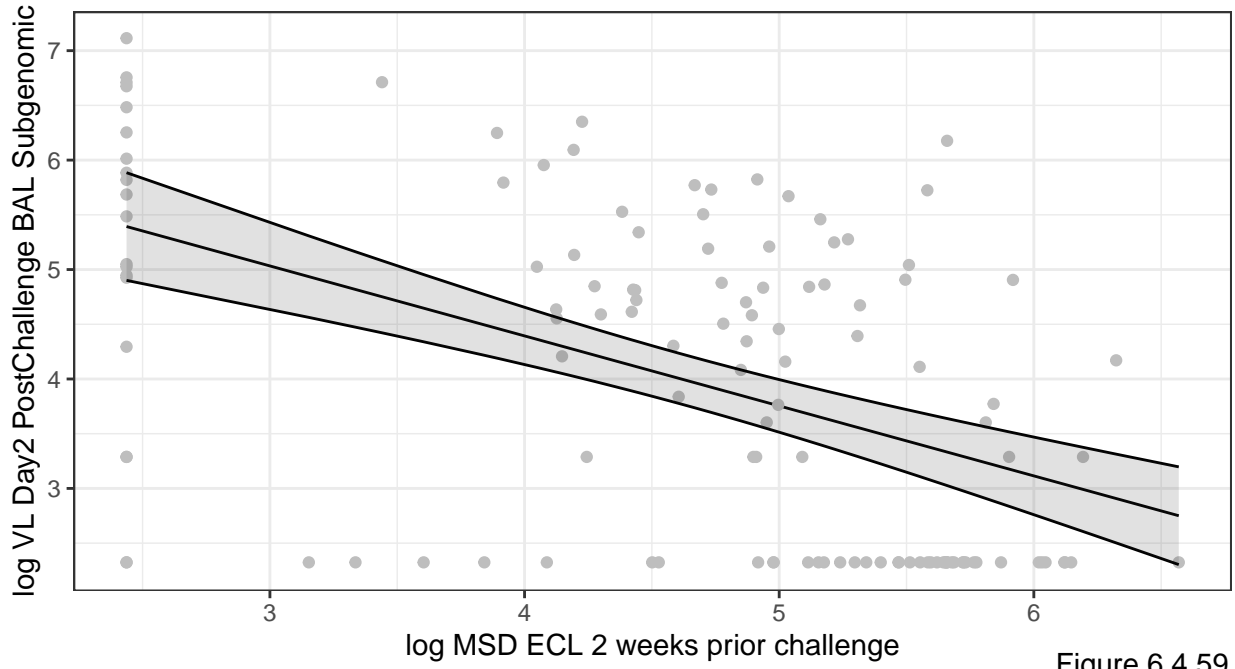

Figure 6.4.59

lm

Est. = -0.75 (-0.97, -0.53), p<0.001

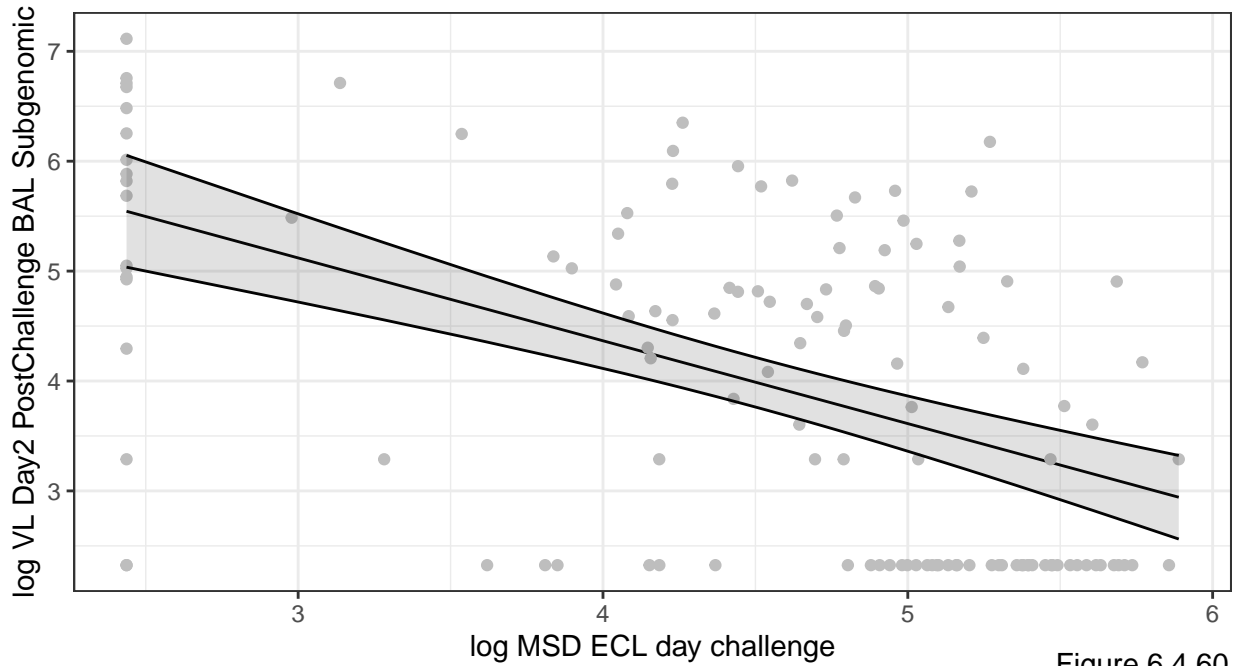

Figure 6.4.60

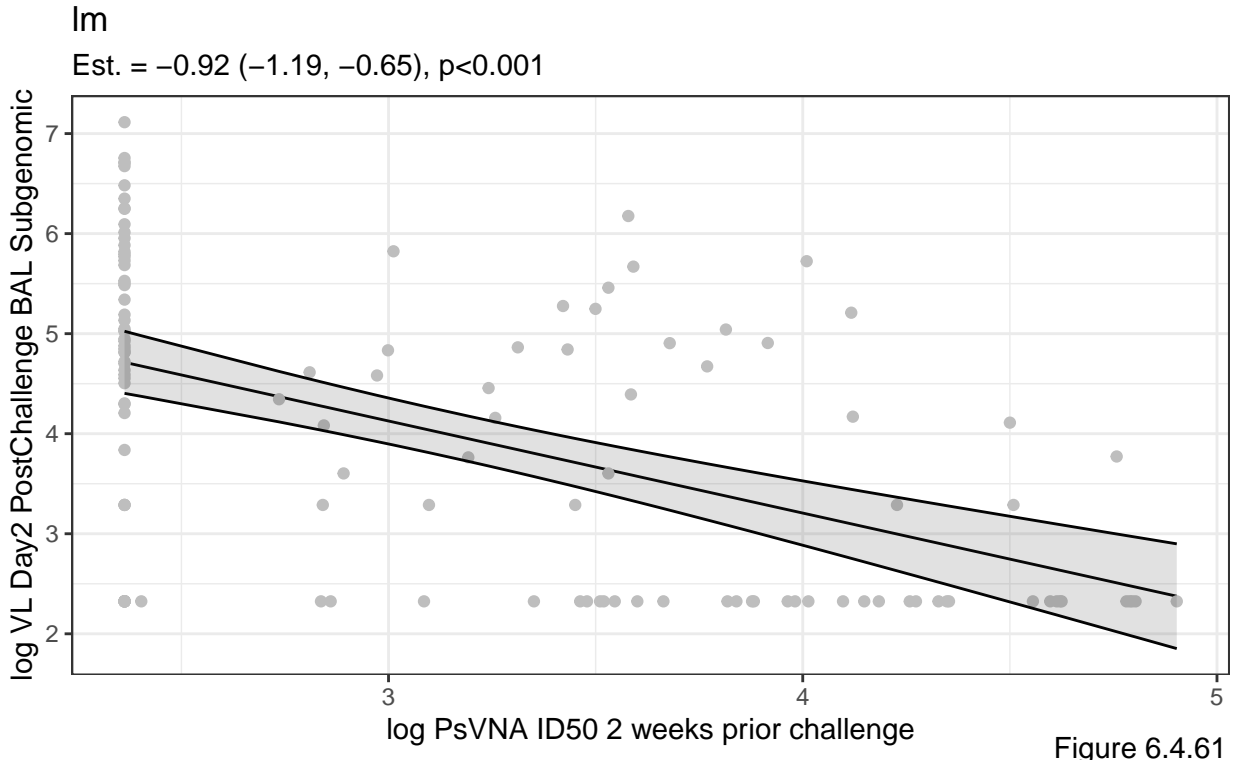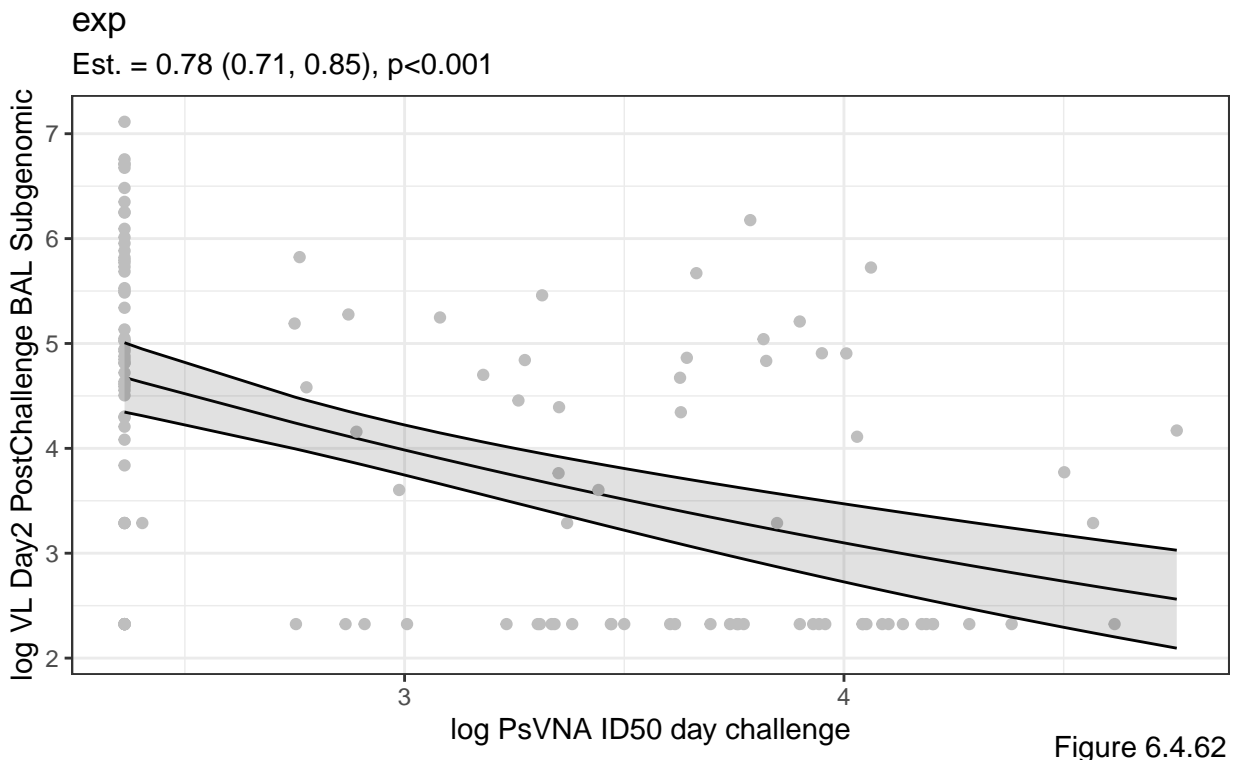

lm

Est. = -0.77 (-1, -0.55),  $p < 0.001$

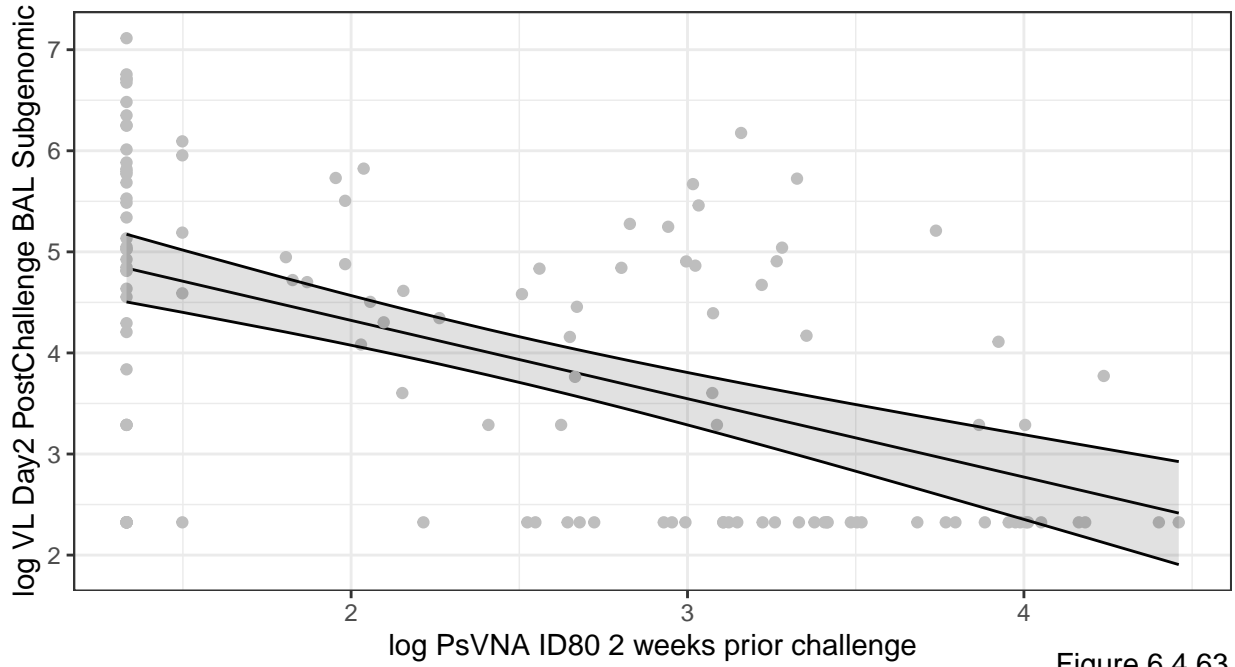

exp

Est. = 0.79 (0.73, 0.85),  $p < 0.001$

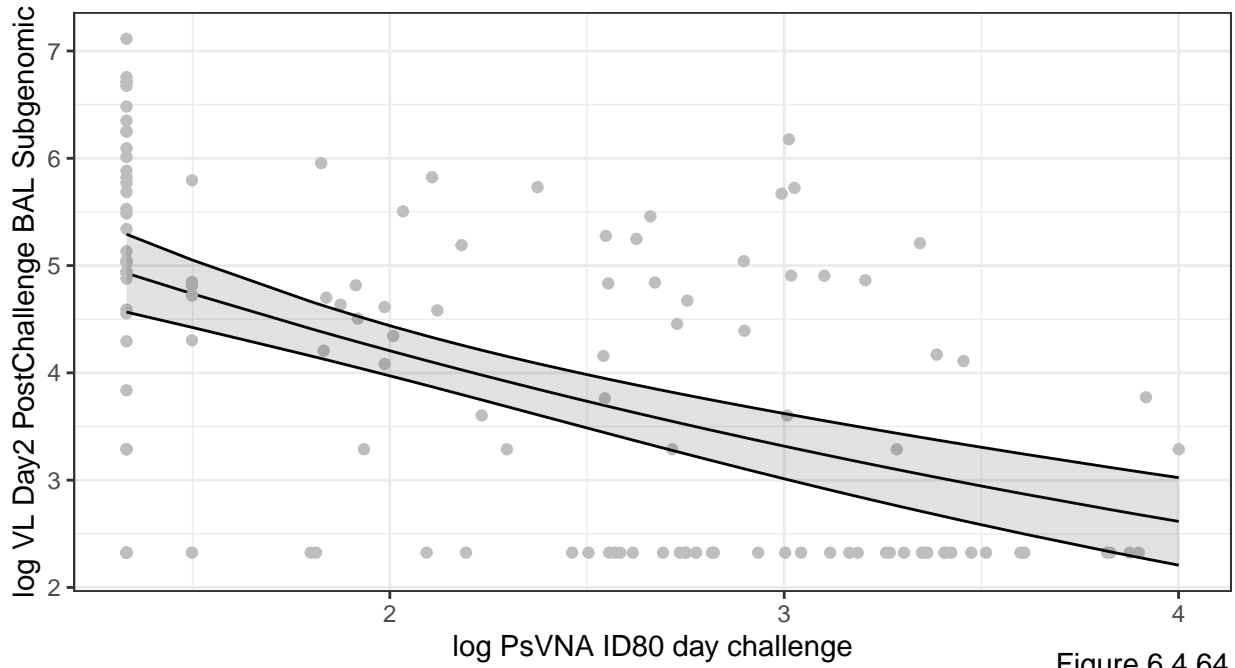

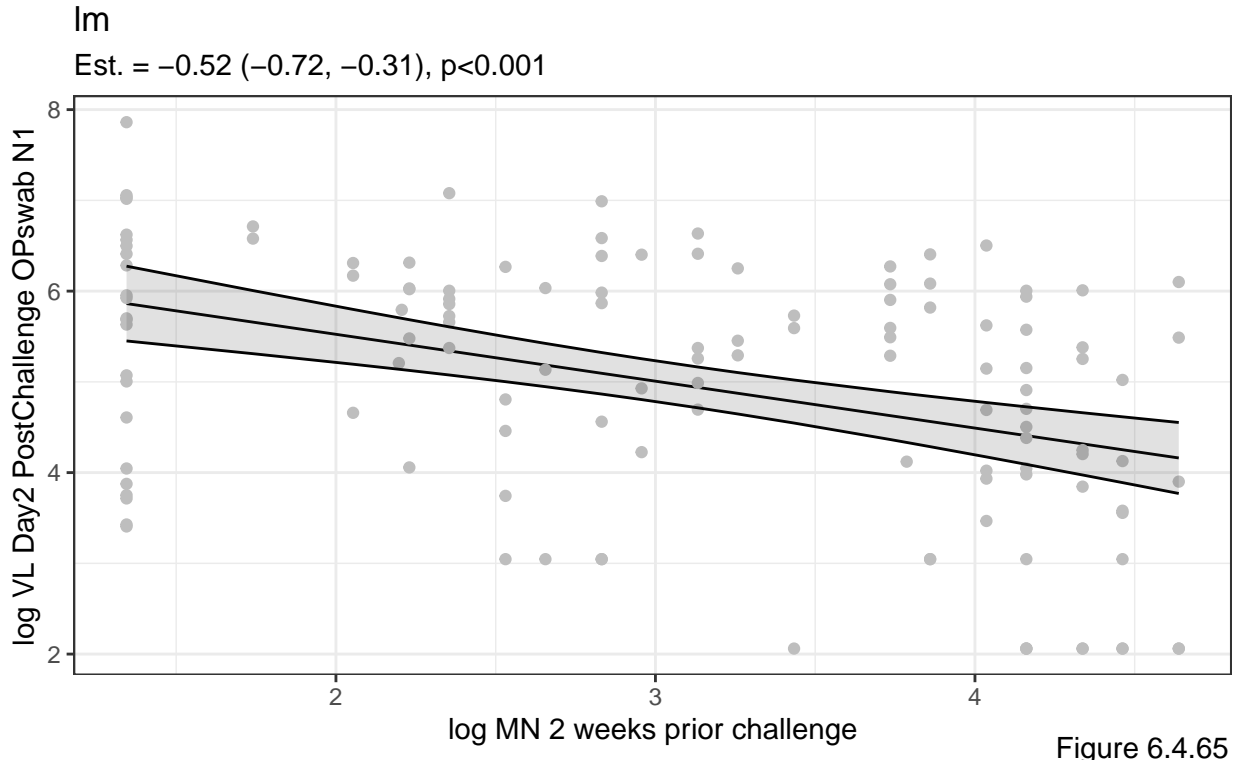

Figure 6.4.65

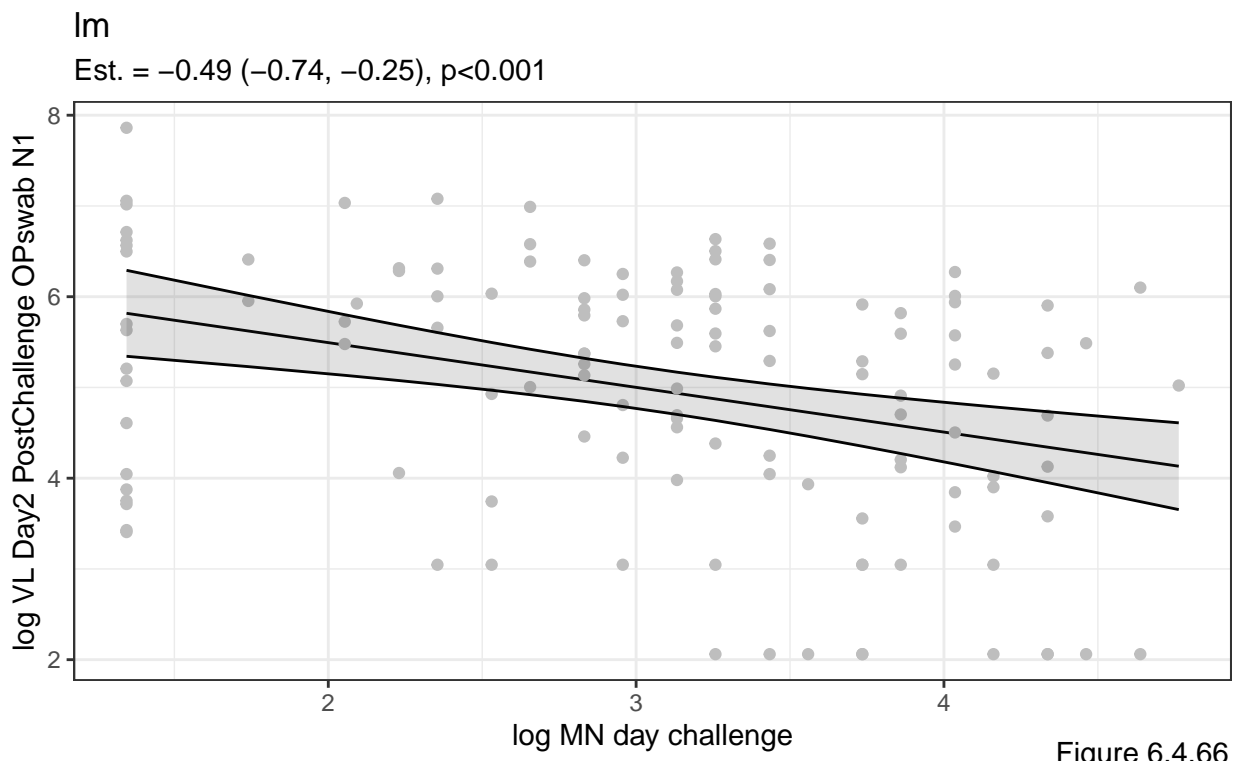

Figure 6.4.66

lm

Est. = -0.42 (-0.62, -0.22), p<0.001

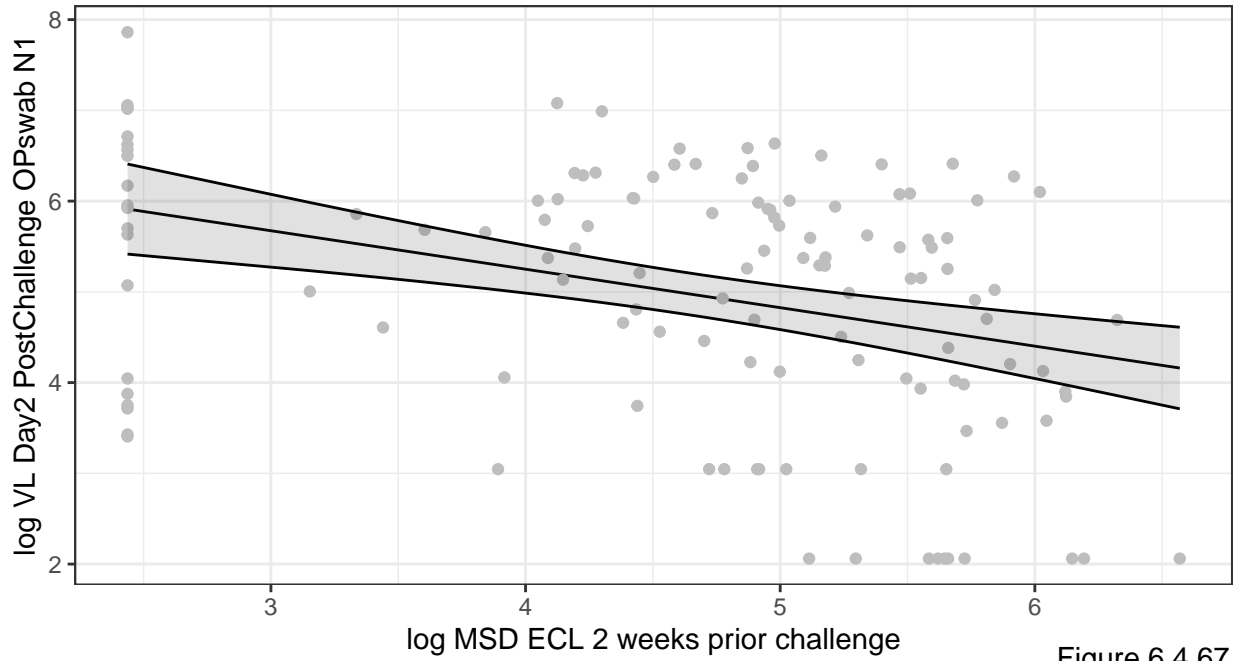

Figure 6.4.67

lm

Est. = -0.48 (-0.71, -0.26), p<0.001

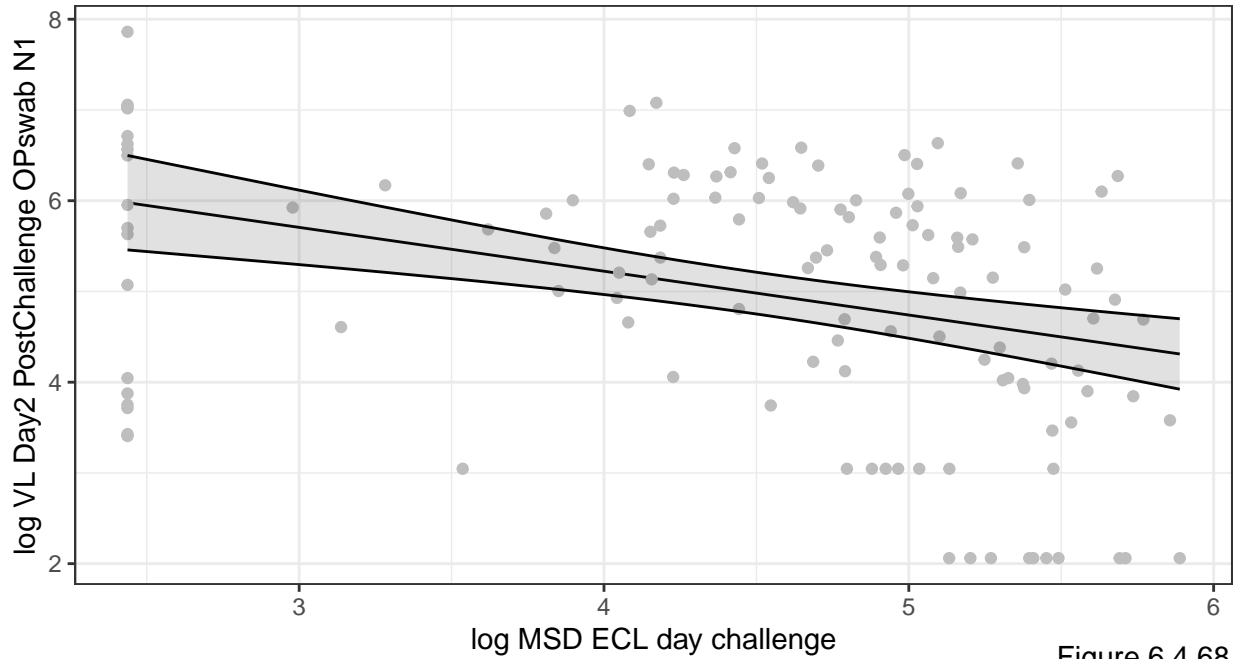

Figure 6.4.68

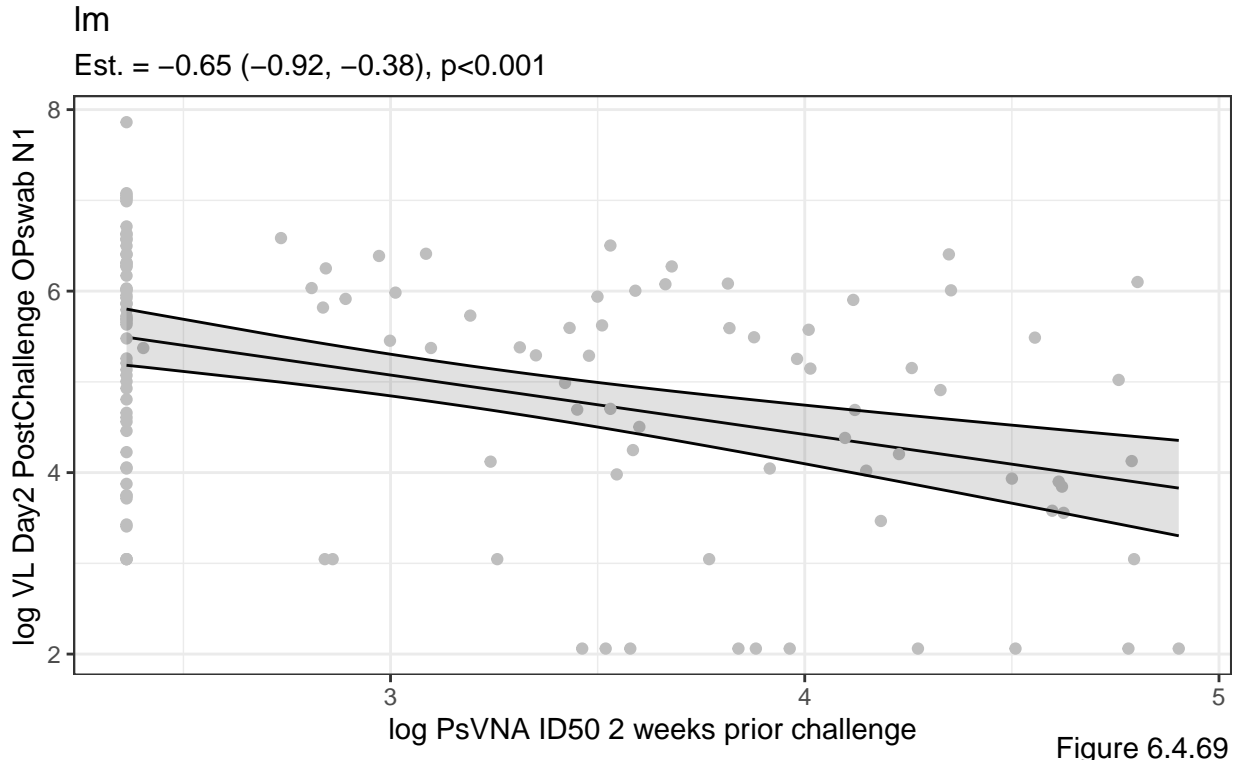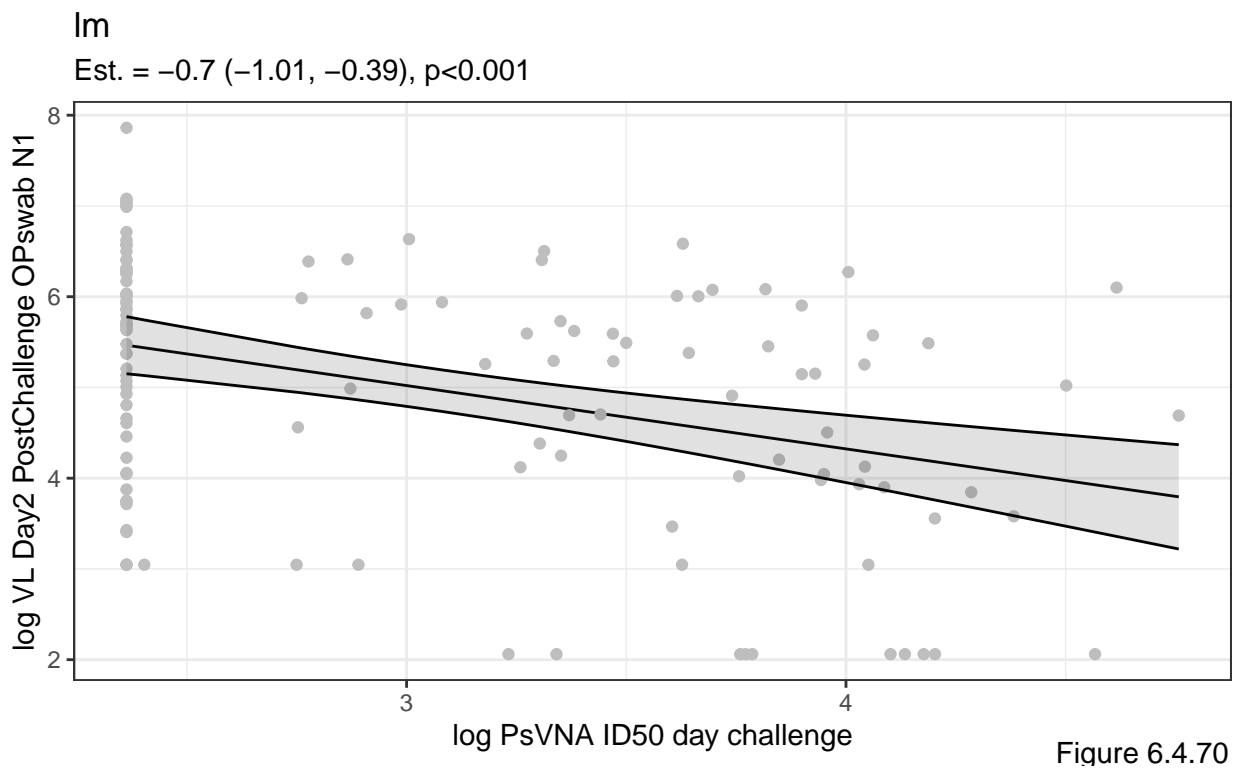

lm

Est. = -0.57 (-0.79, -0.34), p<0.001

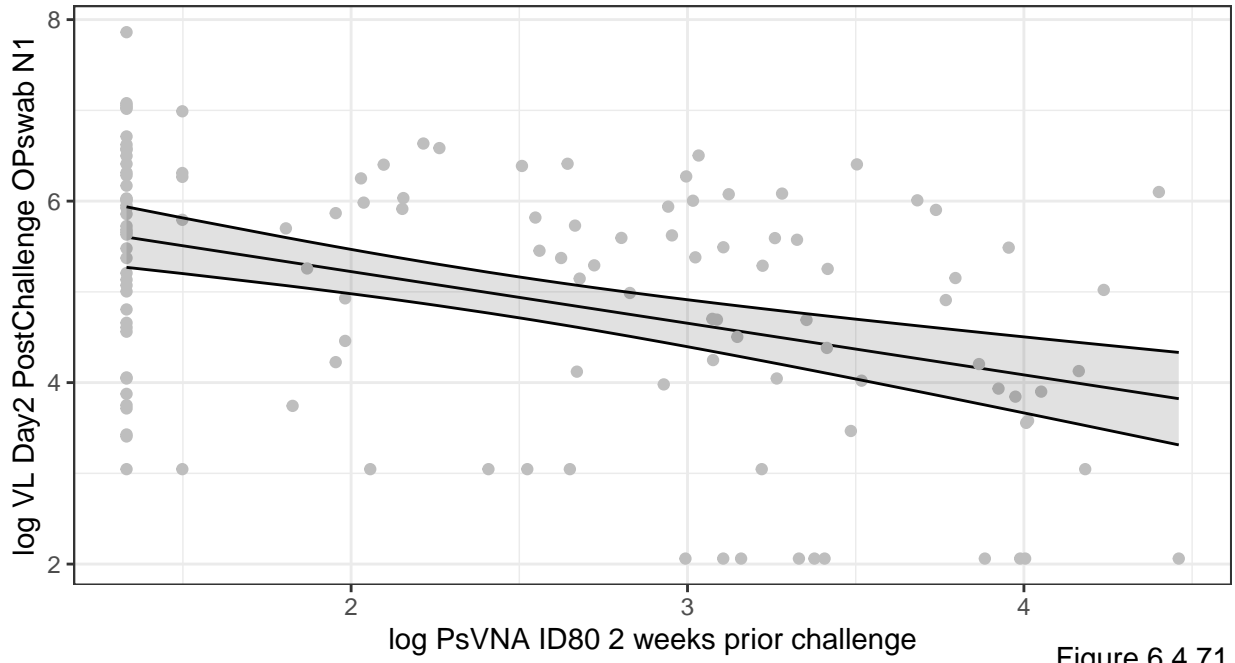

lm

Est. = -0.69 (-0.95, -0.42), p<0.001

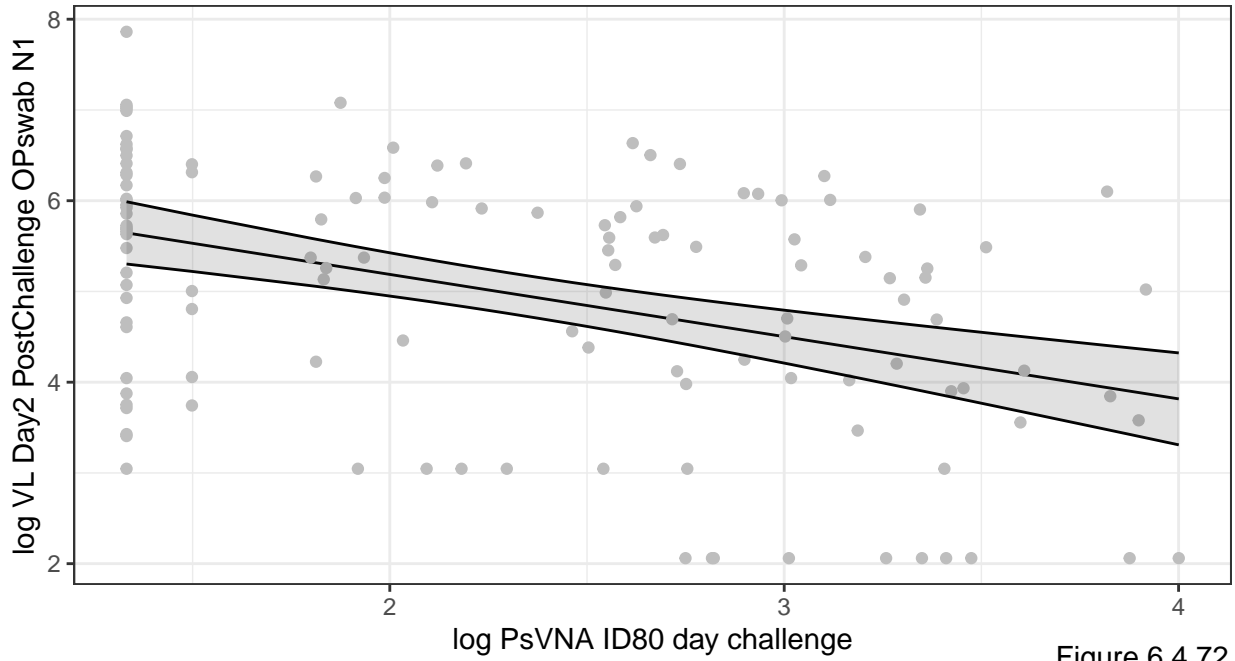

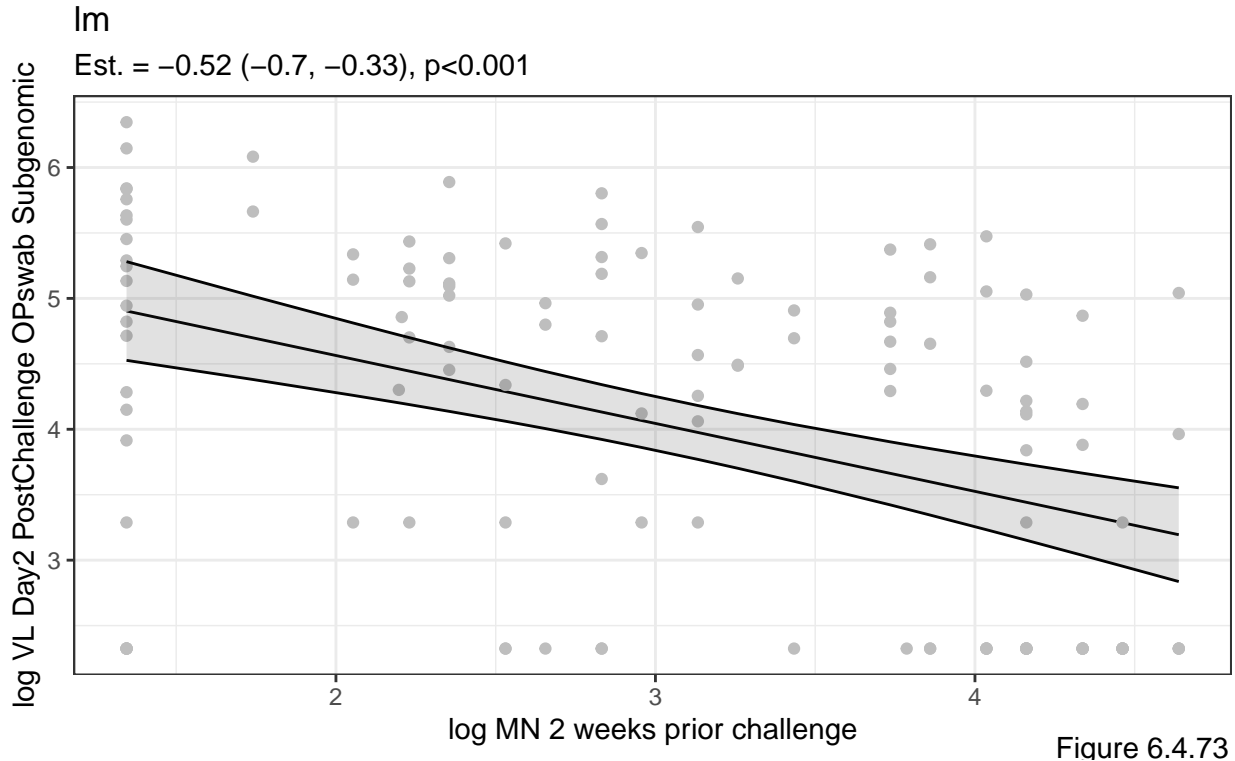

Figure 6.4.73

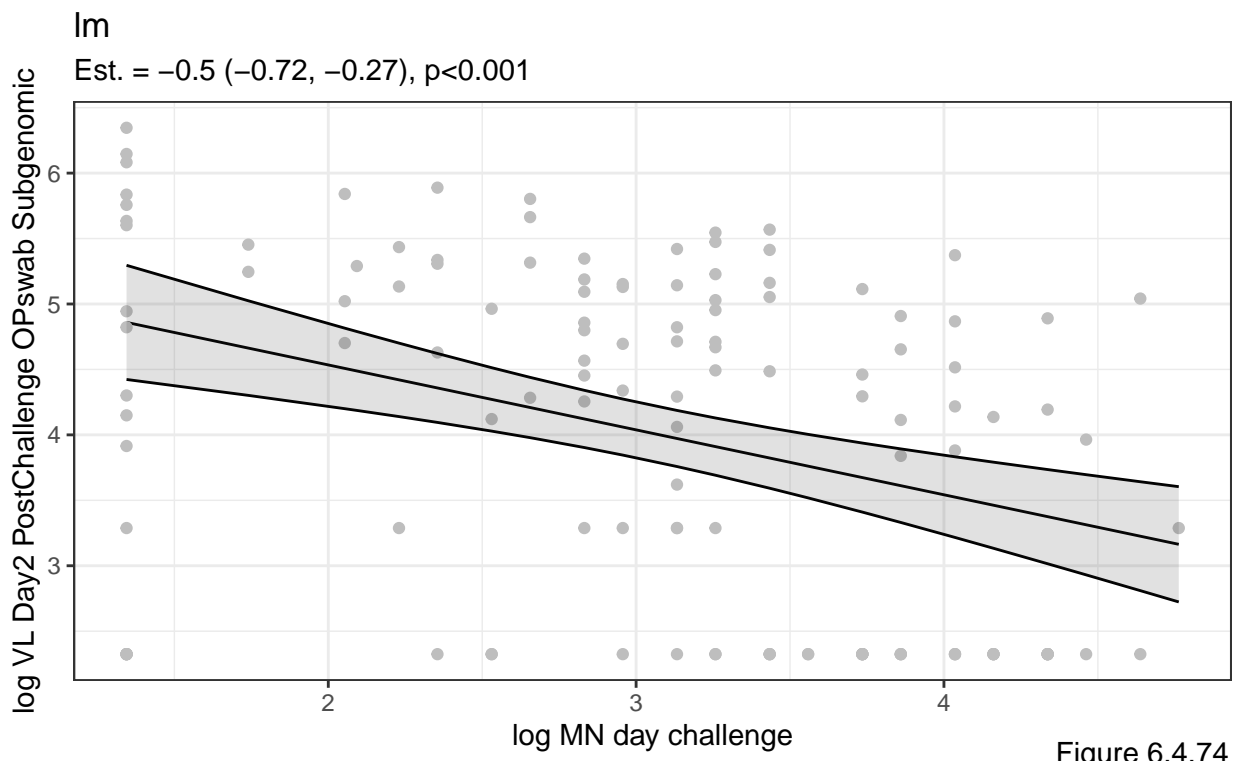

Figure 6.4.74

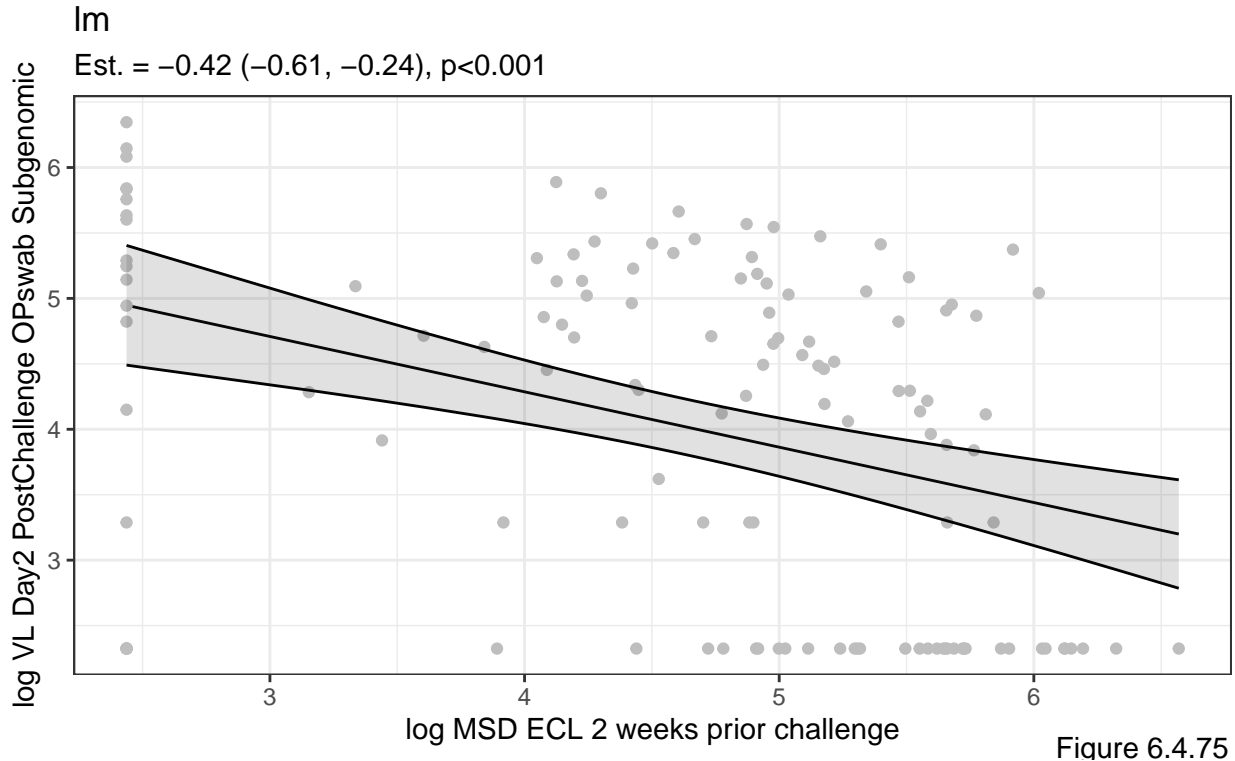

Figure 6.4.75

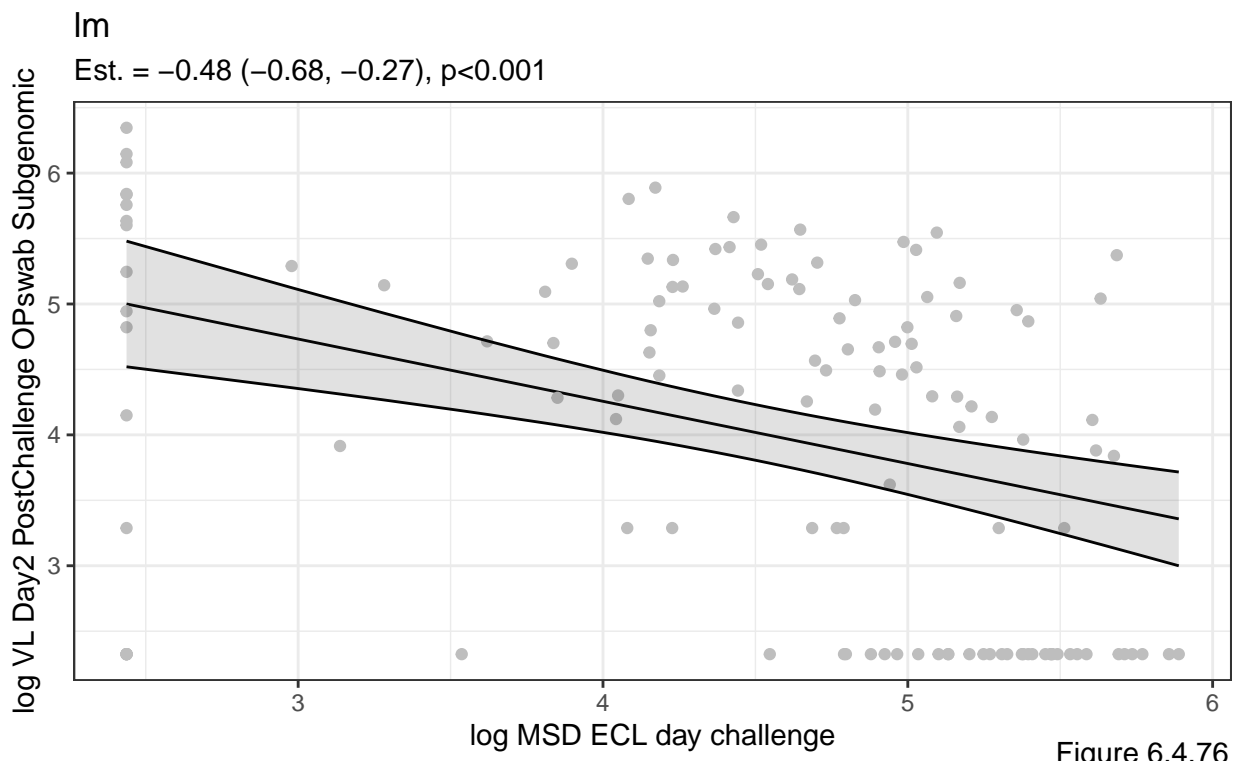

Figure 6.4.76

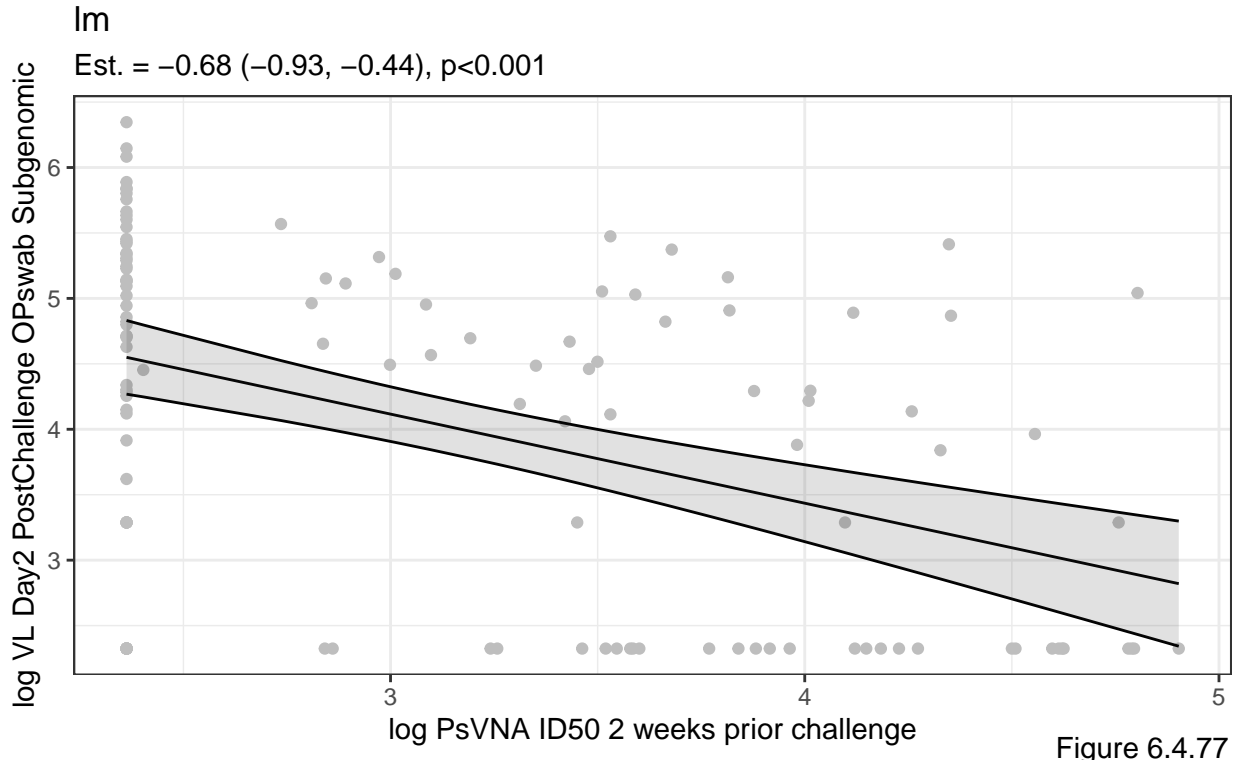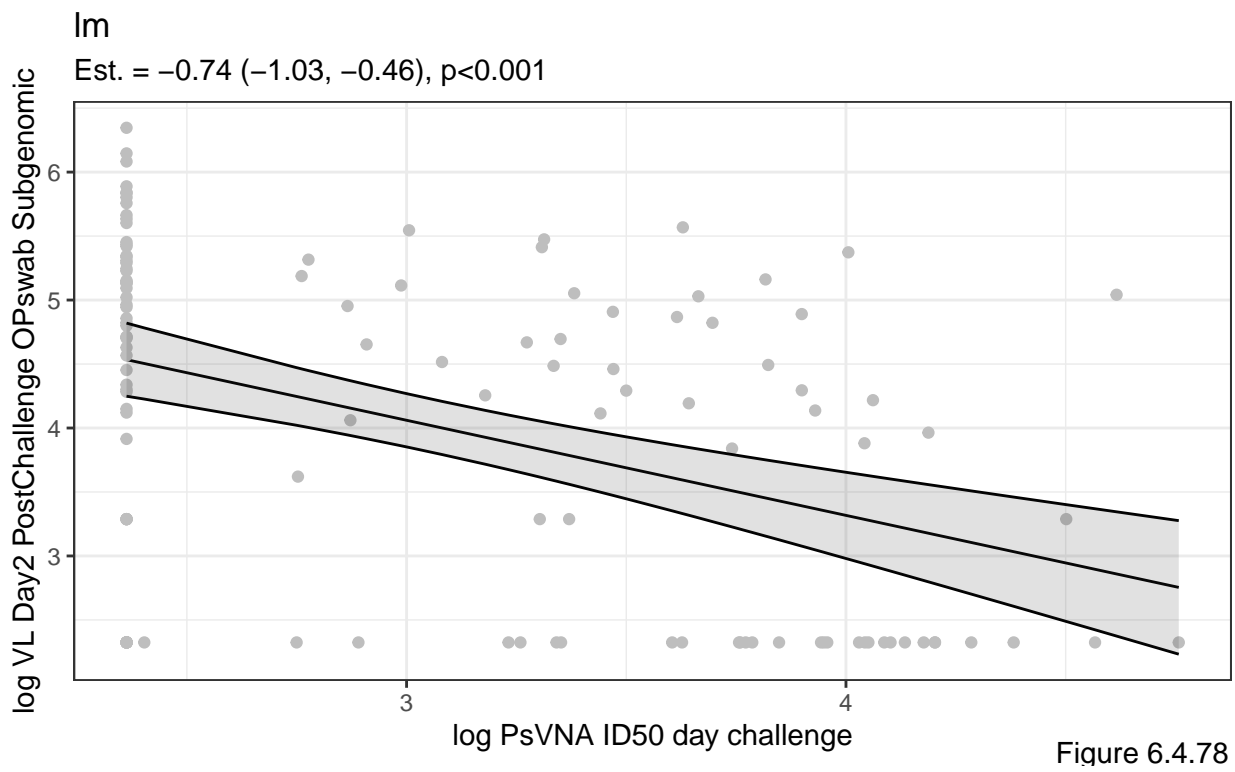

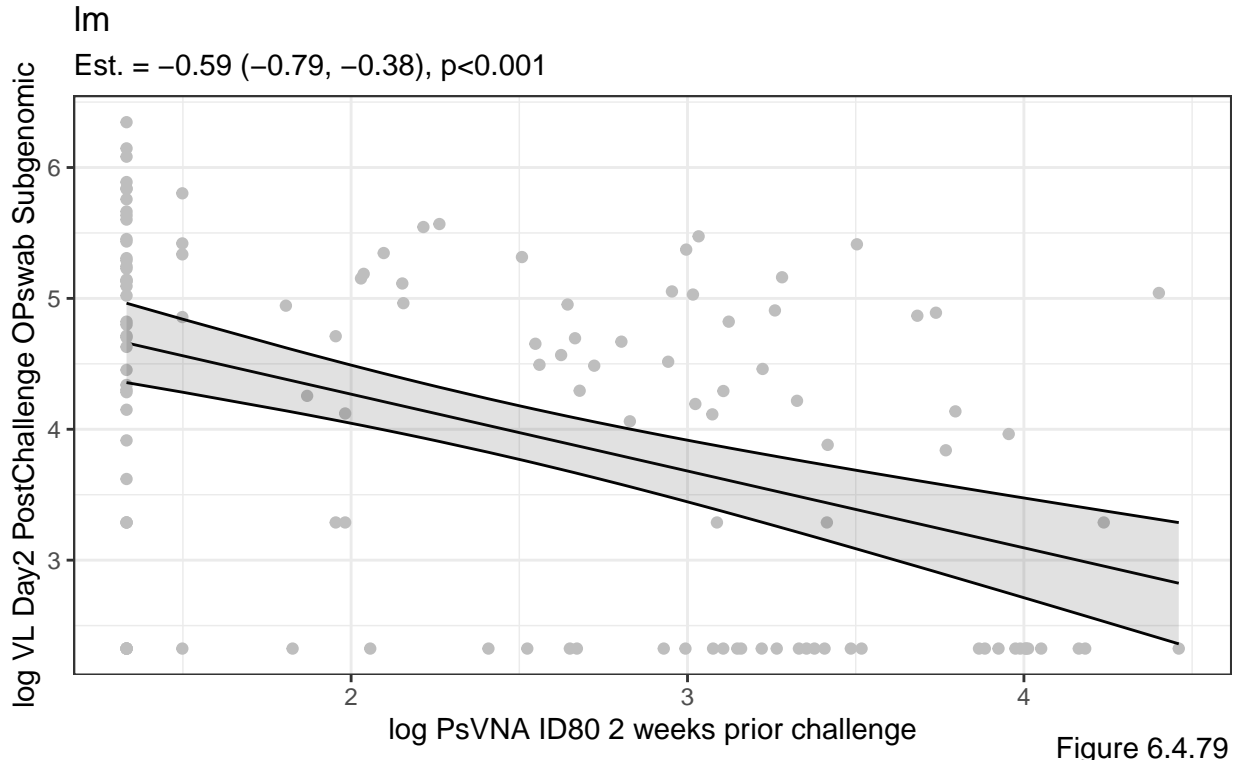

Figure 6.4.79

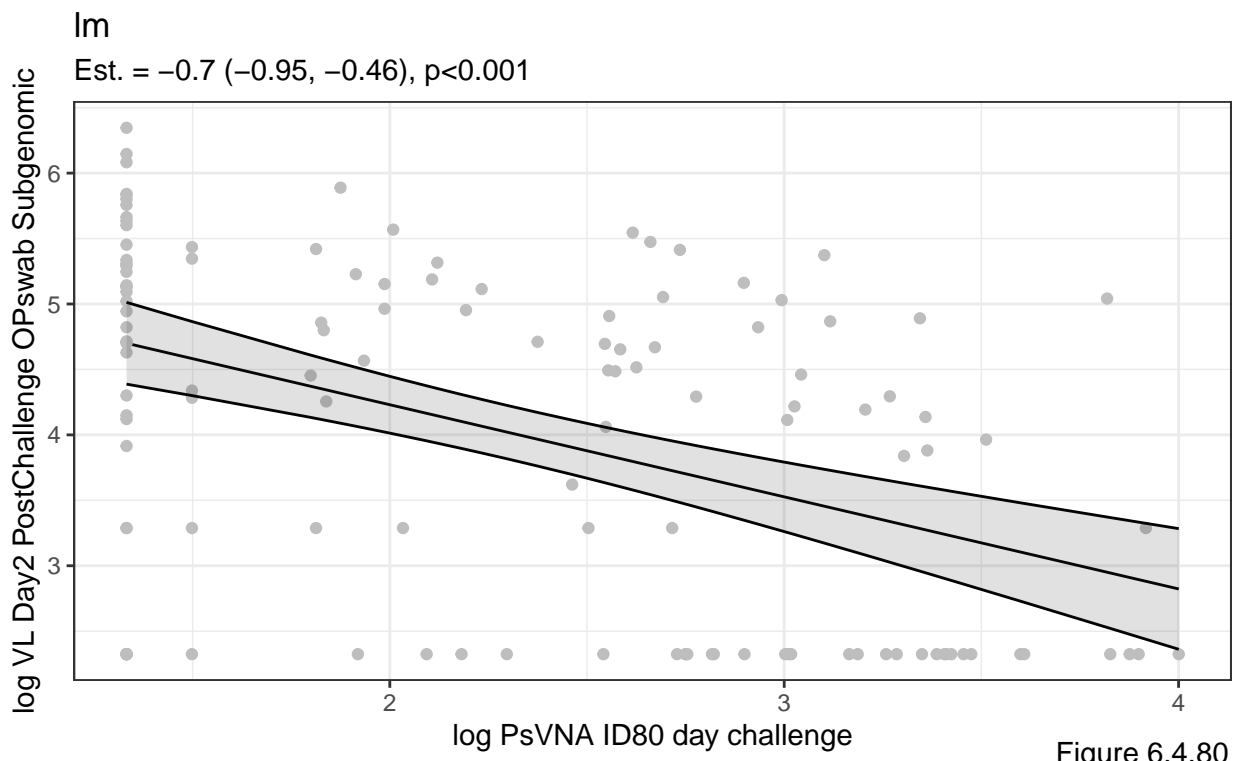

Figure 6.4.80

lm

Est. = -0.78 (-0.94, -0.63), p<0.001

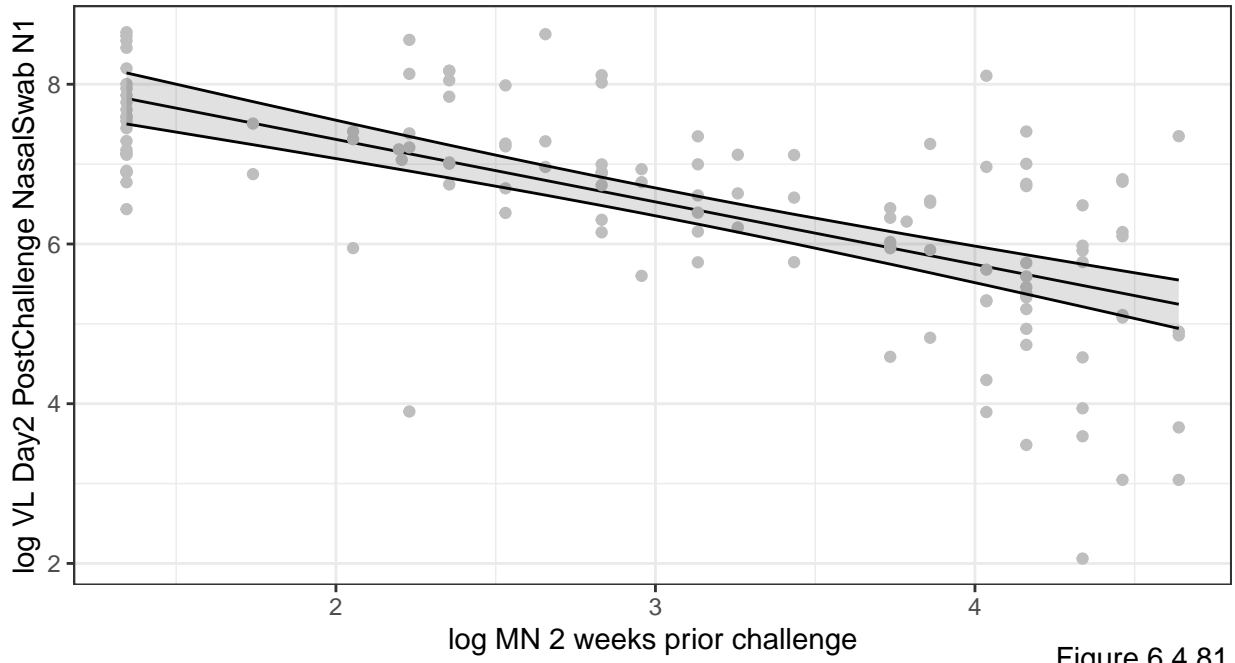

Figure 6.4.81

lm

Est. = -0.84 (-1.03, -0.65), p<0.001

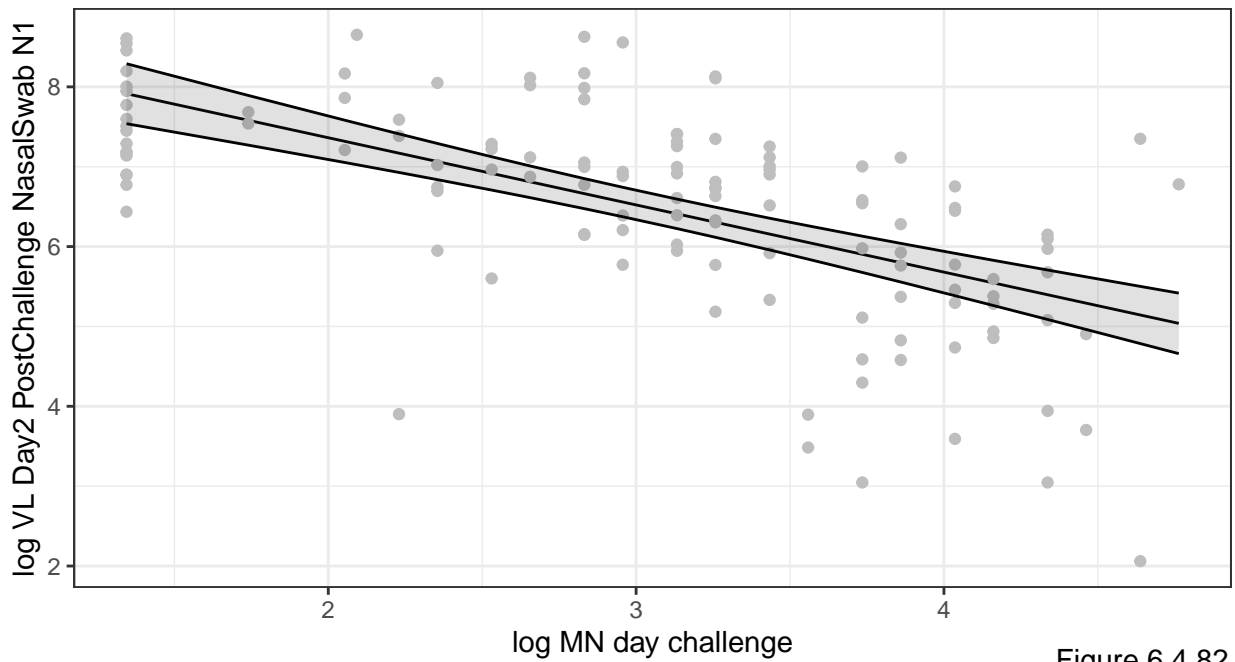

Figure 6.4.82

lm

Est. = -0.71 (-0.87, -0.55), p<0.001

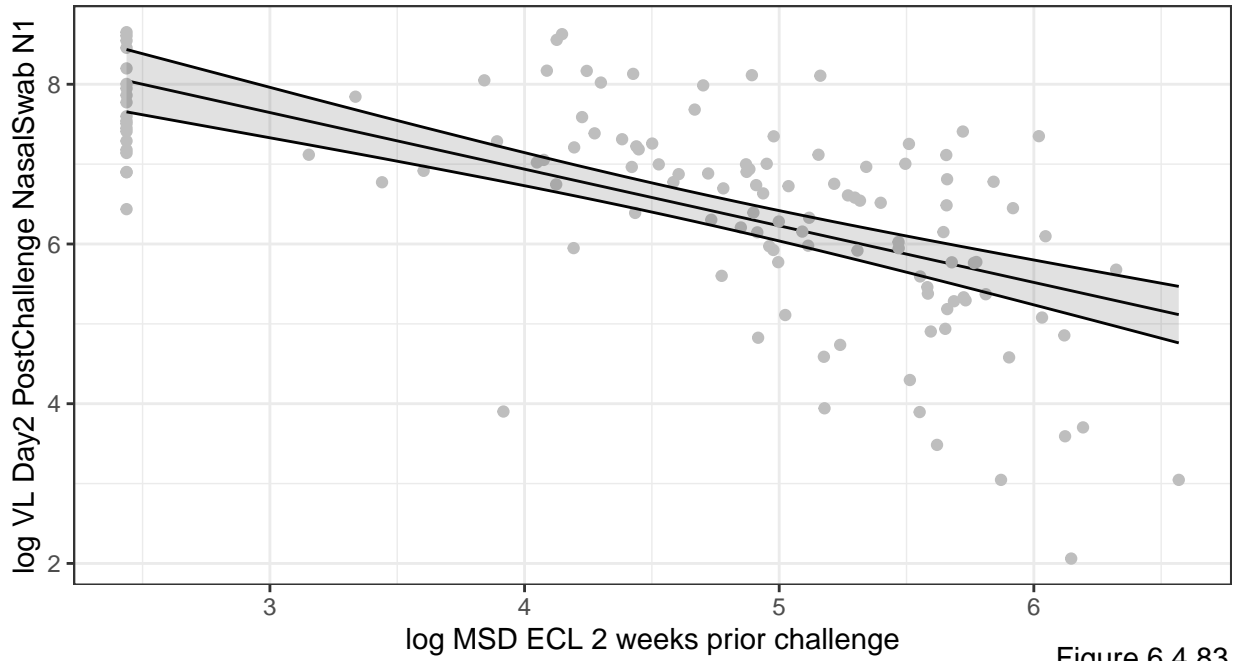

Figure 6.4.83

lm

Est. = -0.76 (-0.95, -0.58), p<0.001

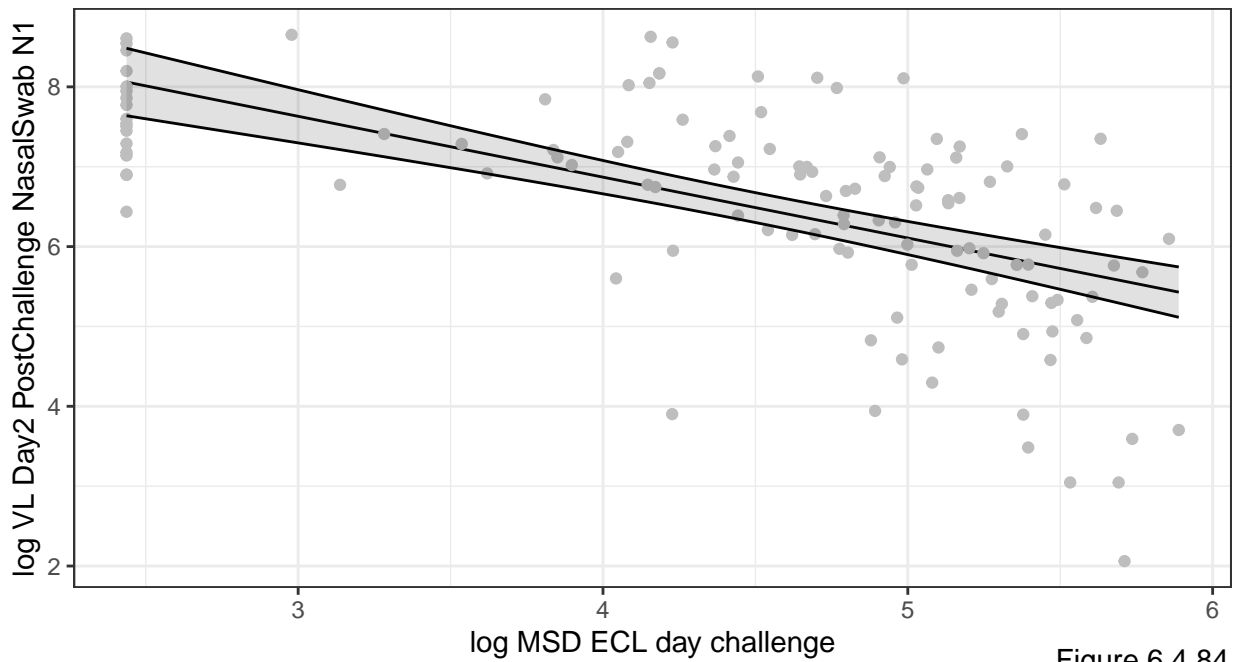

Figure 6.4.84

lm

Est. = -1.05 (-1.25, -0.84), p<0.001

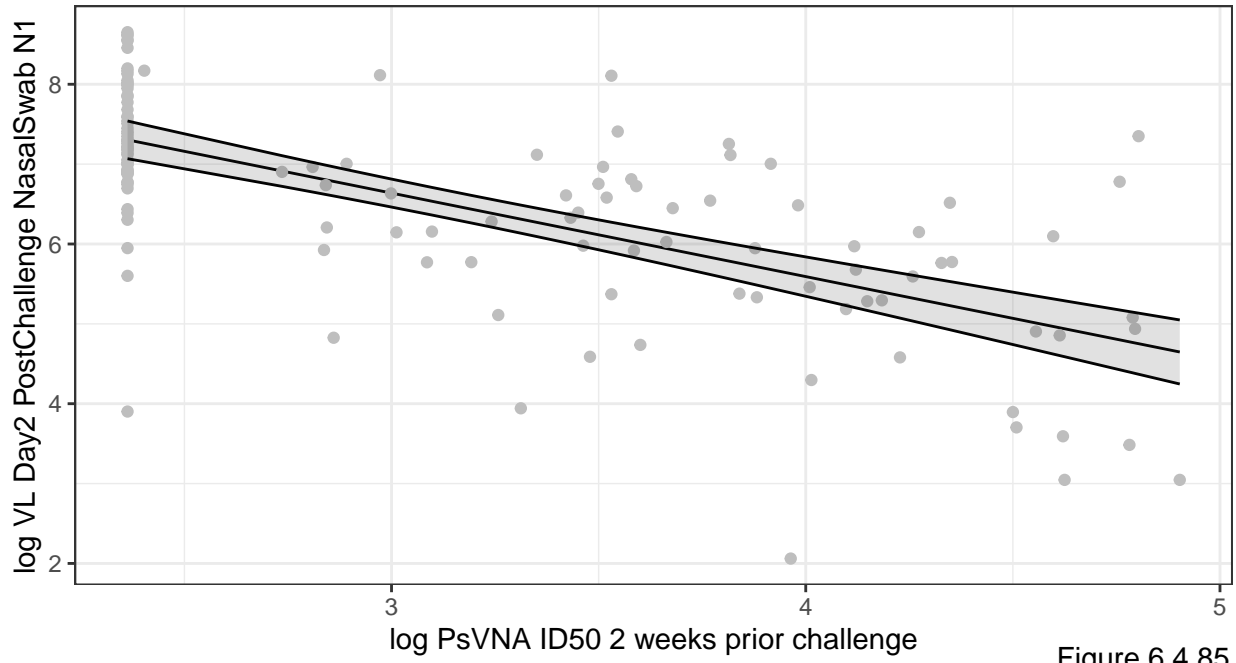

Figure 6.4.85

lm

Est. = -1.12 (-1.36, -0.87), p<0.001

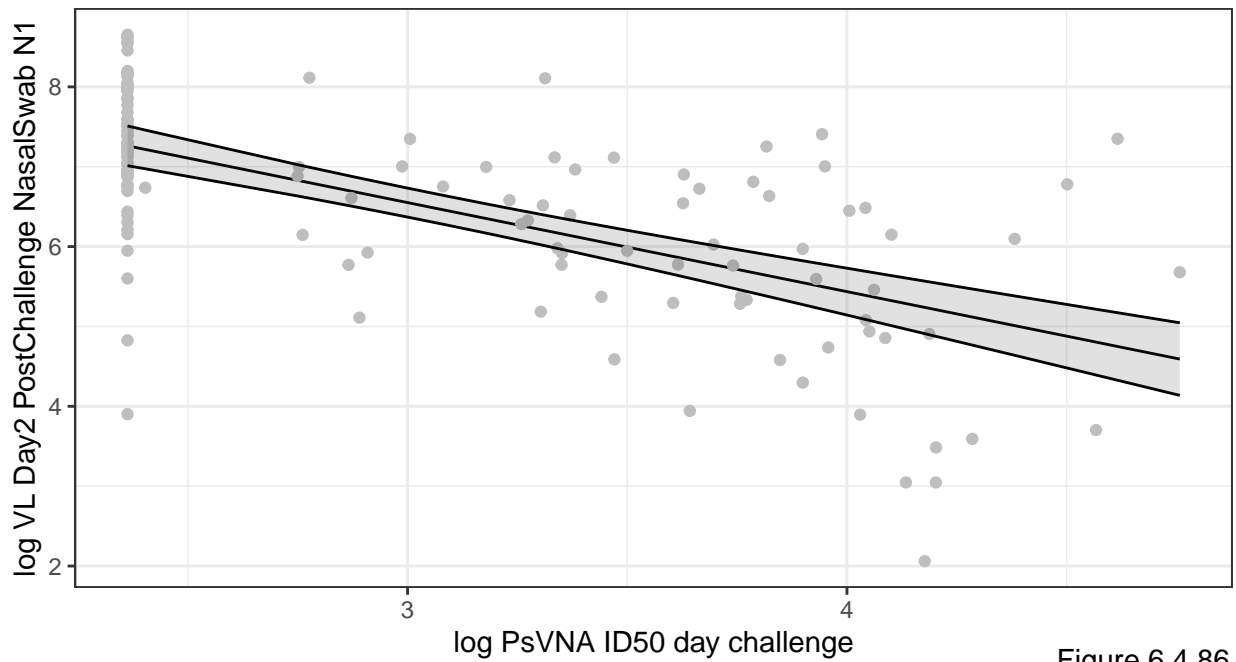

Figure 6.4.86

lm

Est. = -0.88 (-1.05, -0.71), p<0.001

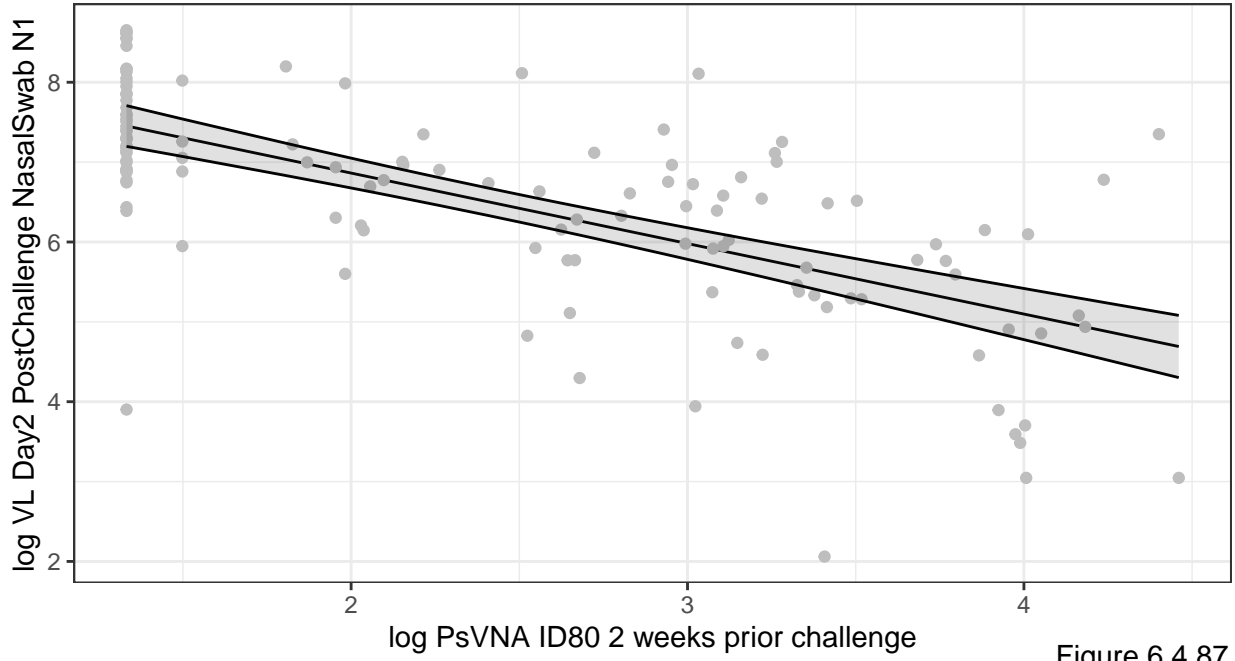

Figure 6.4.87

lm

Est. = -1.07 (-1.27, -0.86), p<0.001

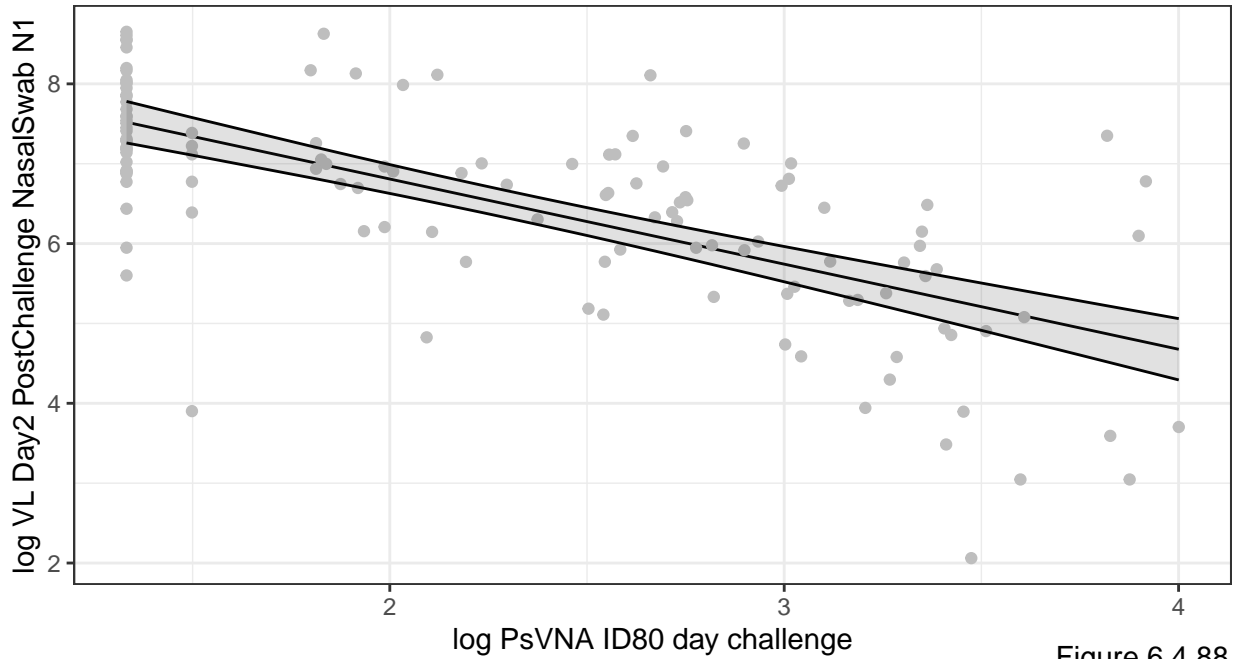

Figure 6.4.88

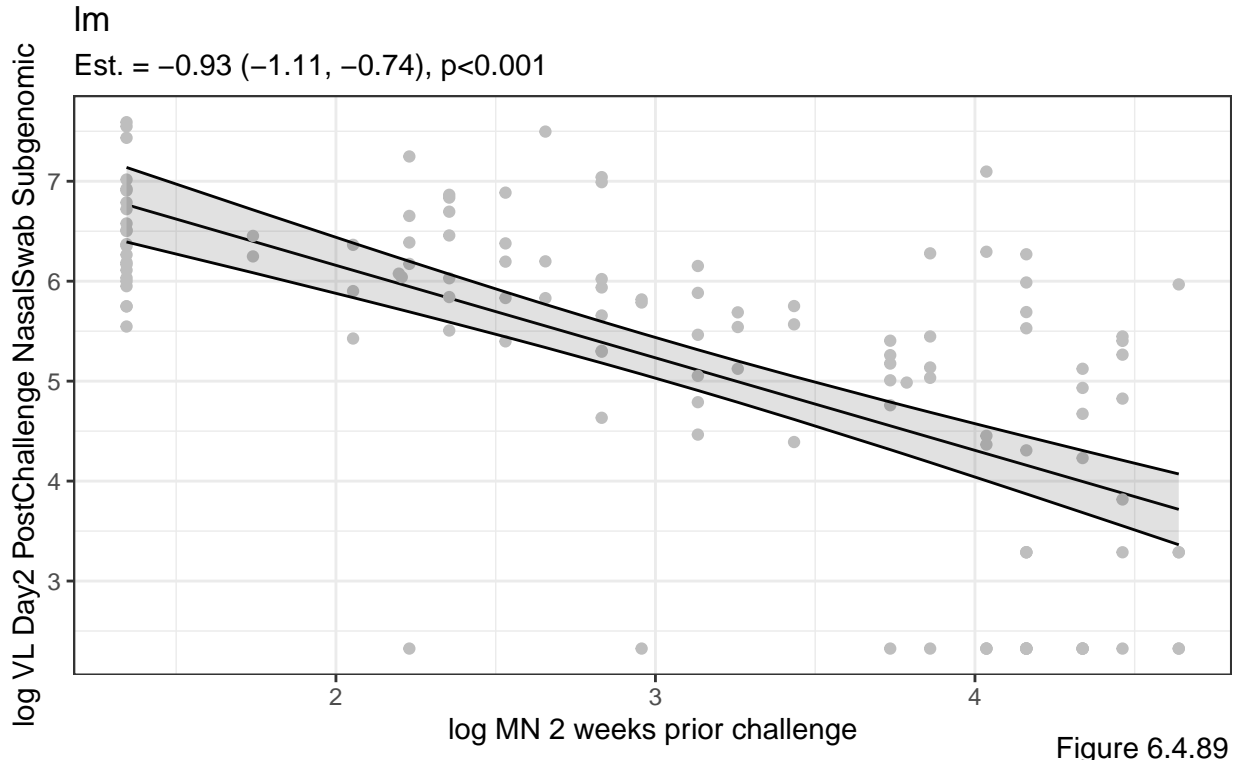

Figure 6.4.89

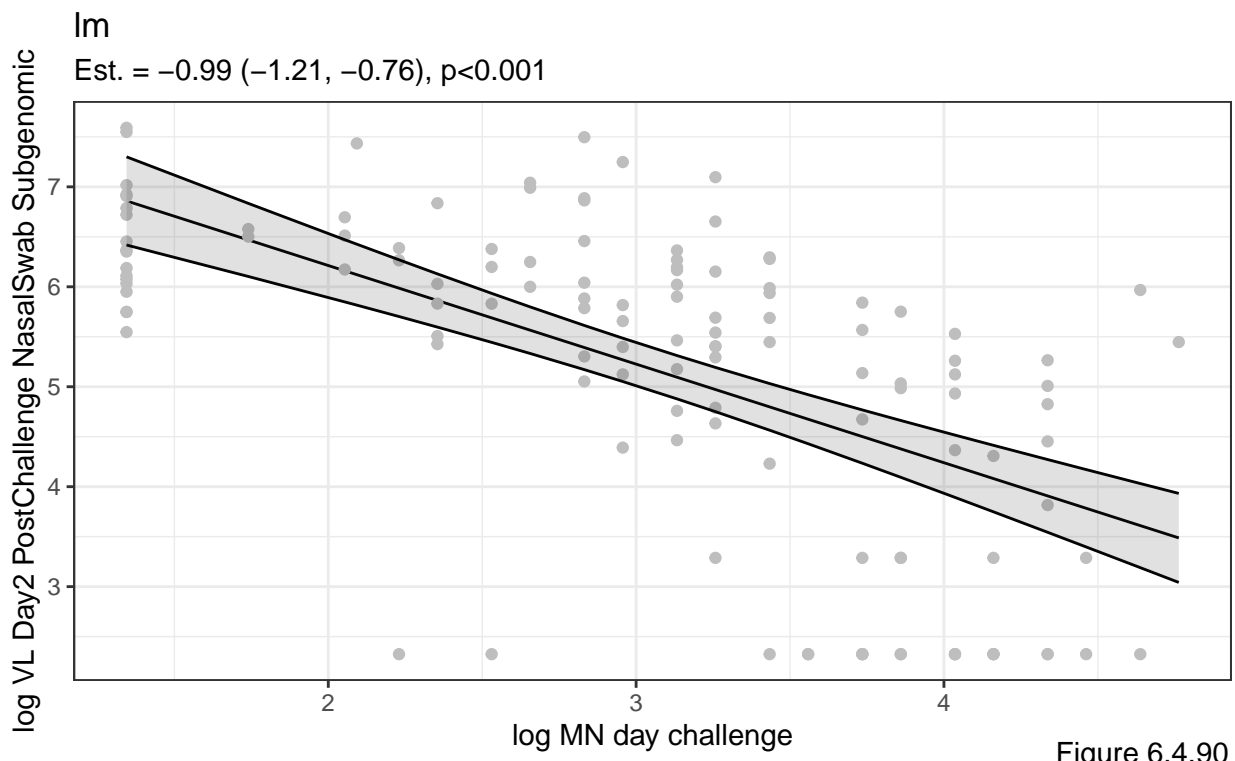

Figure 6.4.90

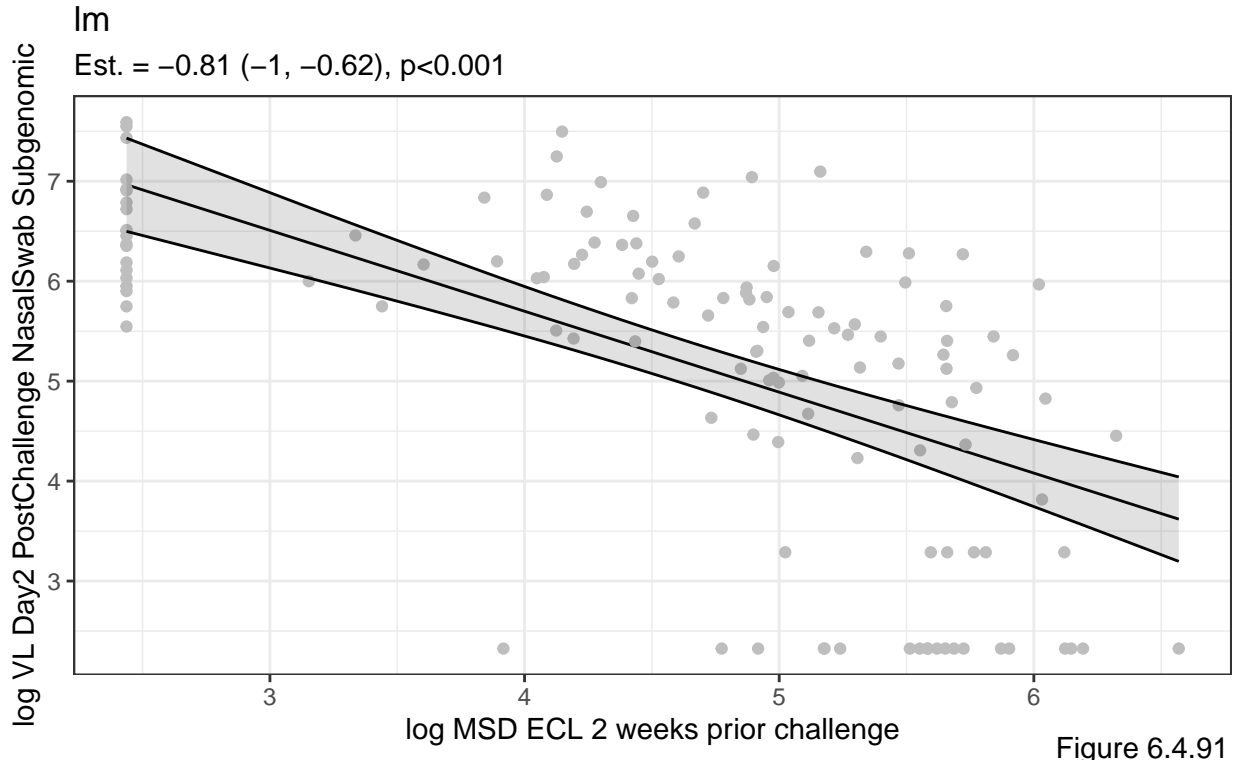

Figure 6.4.91

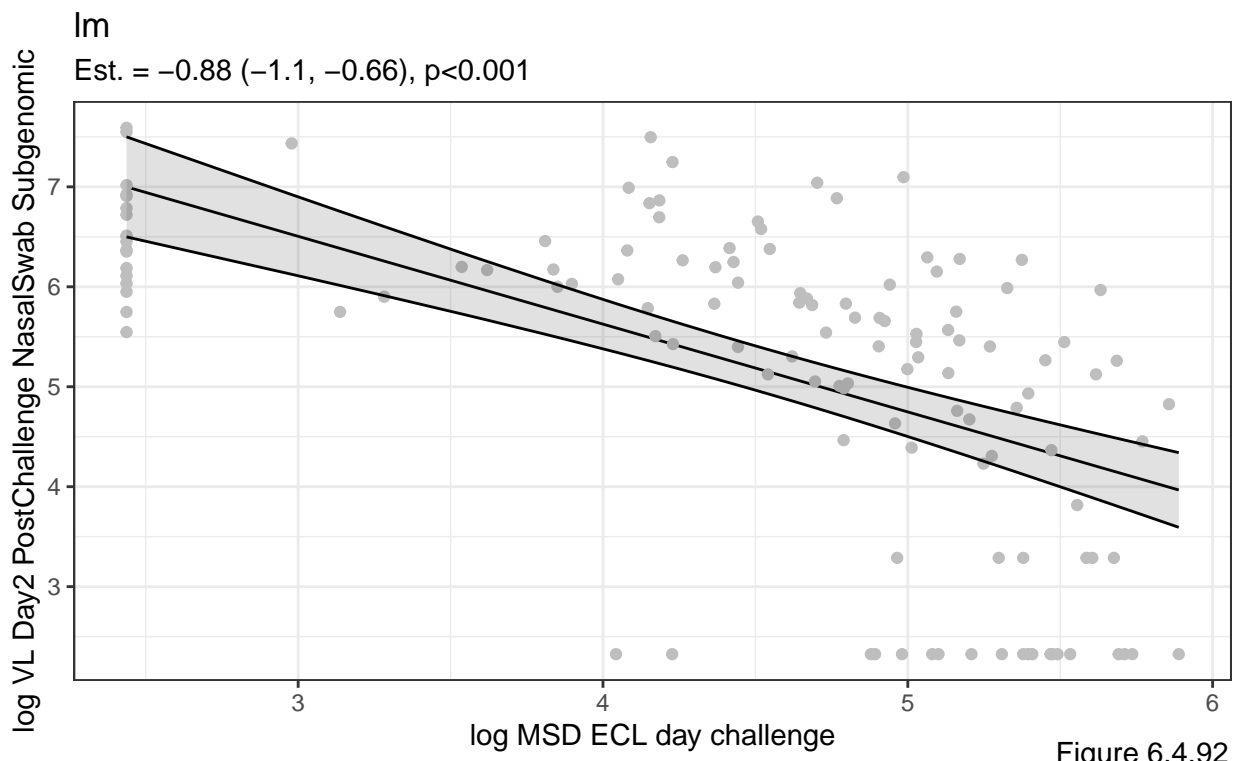

Figure 6.4.92

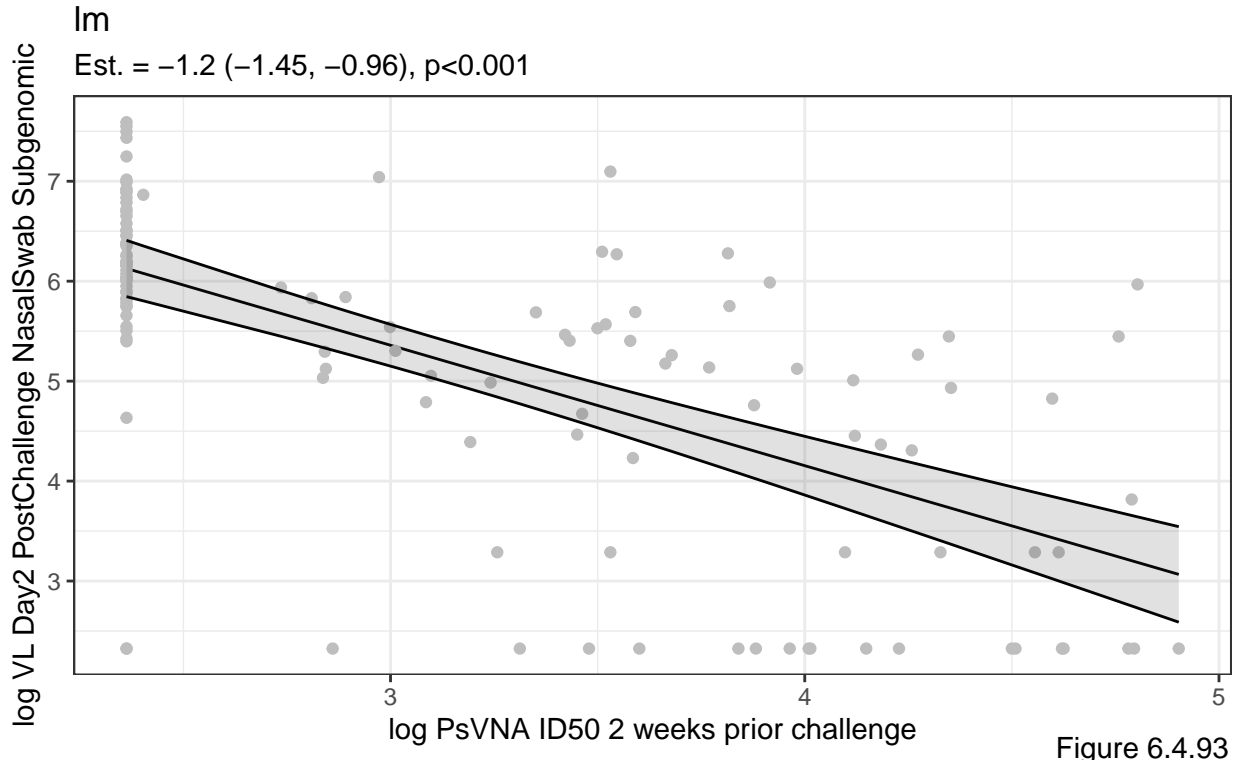

Figure 6.4.93

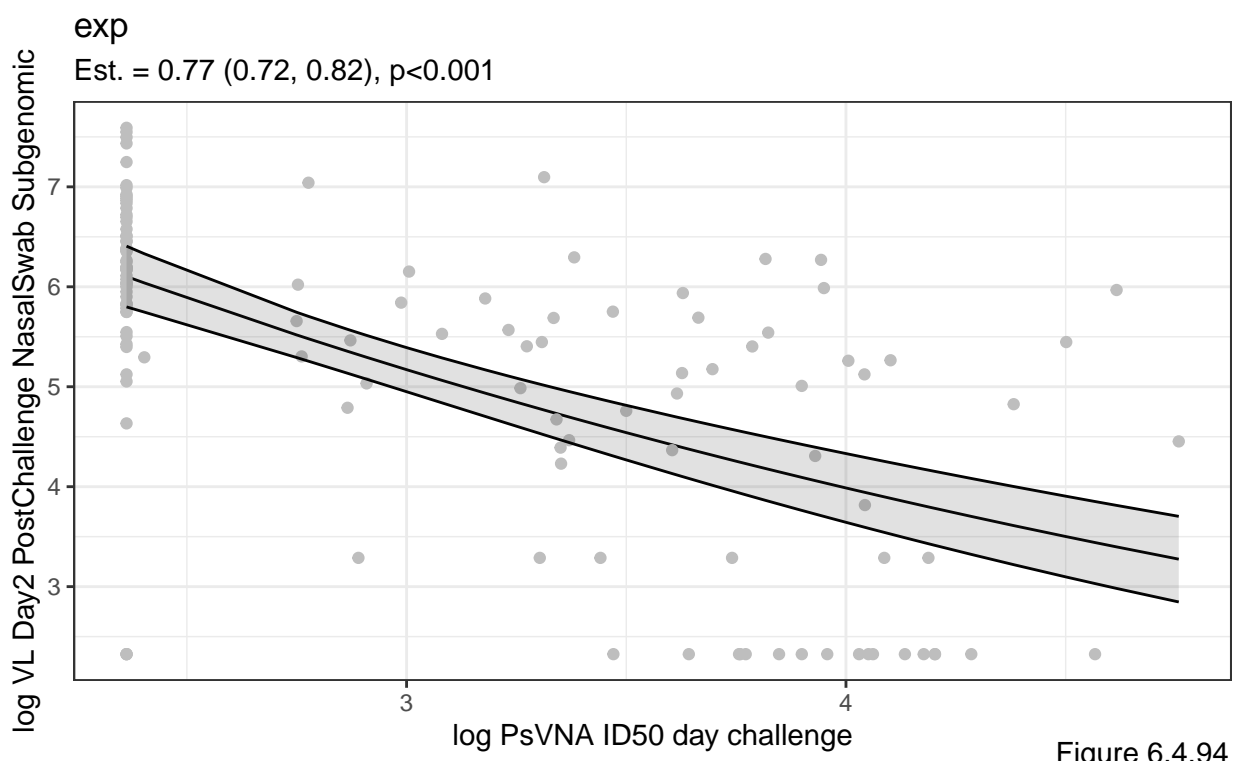

Figure 6.4.94

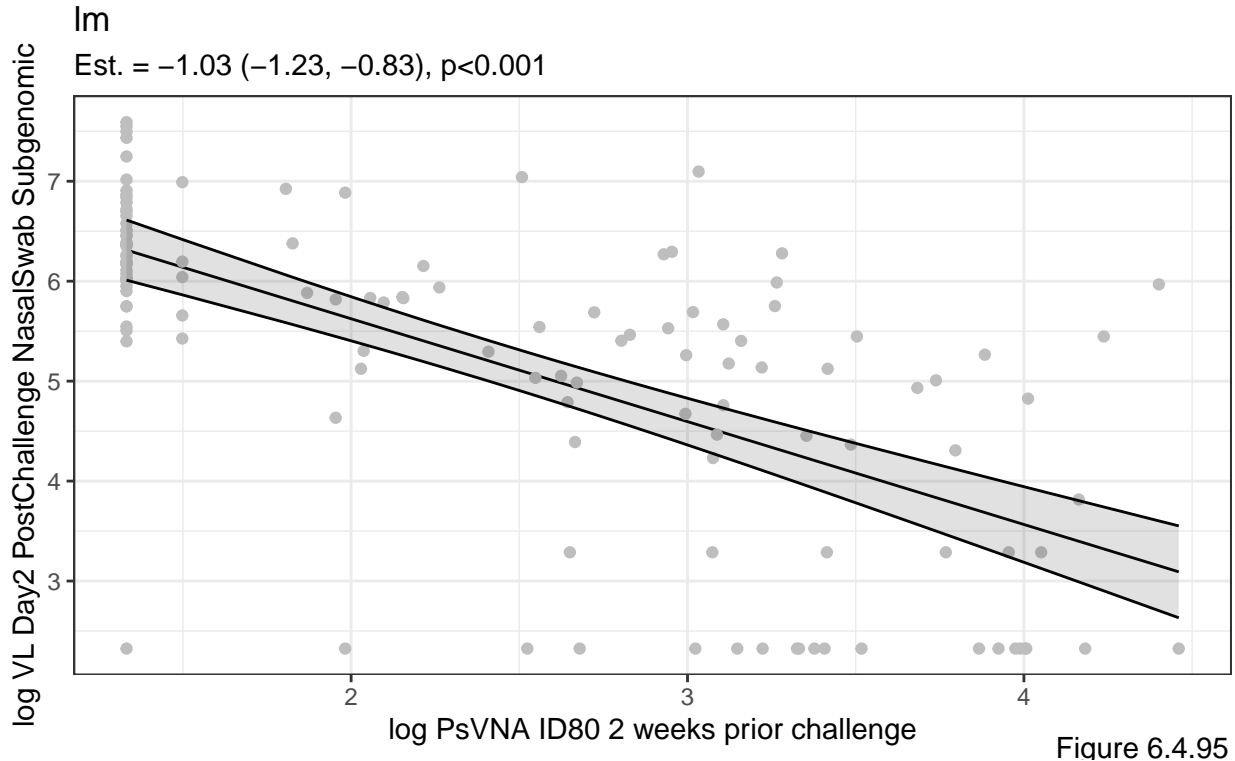

Figure 6.4.95

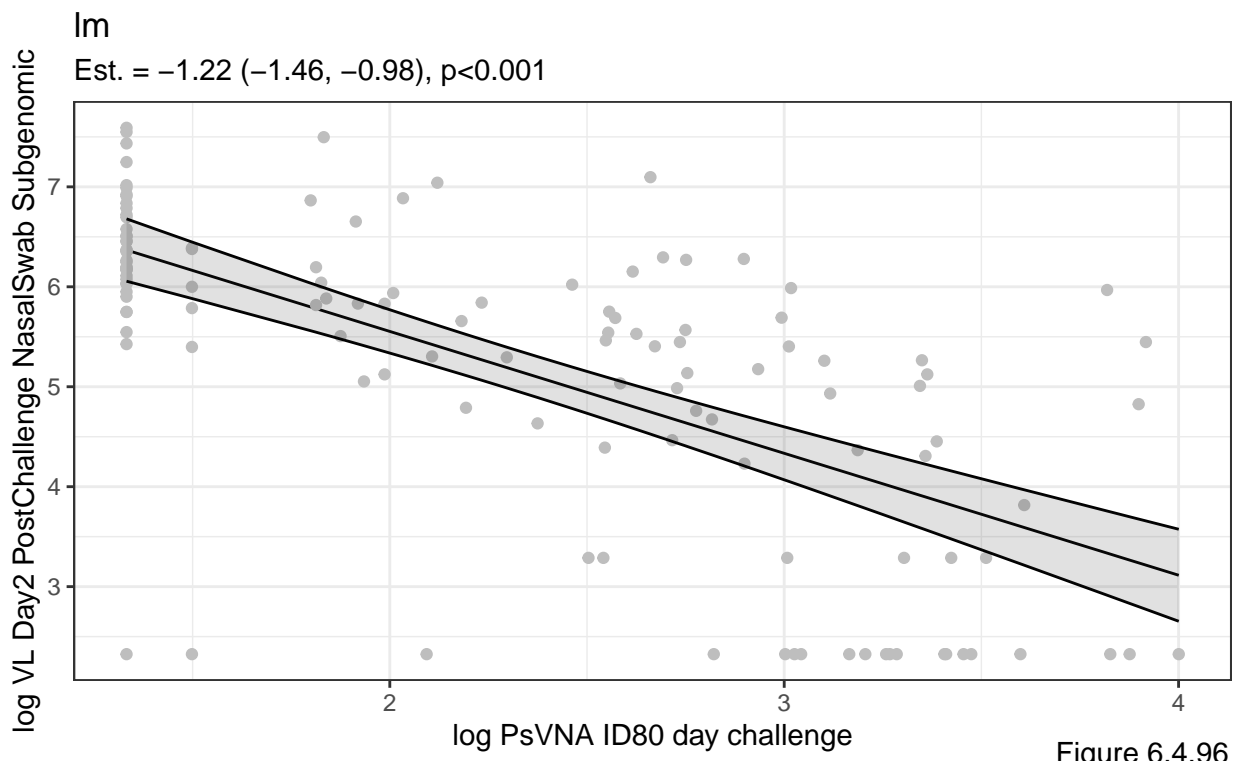

Figure 6.4.96

## 6.4.2 Binary Viral Load

For binary viral load, a logistic model is fit with an intercept and one main effect for virus-specific antibody. The notation is the same as in Section 6.4.1, except now  $y_{jk}$  represents a binary response. As in the previous section, several models will be tried and the best one selected by cross-validation. Instead of comparing the models using adjusted R-squared, we use the binary analog, the adjusted coefficient of discrimination (Tjur, 2009, Fay et al., 2012). The models tried are the following: the logistic model:

$$\log_e\{\mu_{jk}/(1 - \mu_{jk})\} = \beta_0 + \beta_1 x_{jk}$$

Analogously to Section 6.4.1, the linear predictor portion of the model may be modeled in different ways: it could be fit as a segmented line with 2 breakpoints, or fit with natural cubic splines with 5 degrees of freedom. As in section 6.4.1, the best model by cross-validation will be fit to all of the data (enforcing monotonicity if needed), with confidence intervals on the prediction calculated using the parametric formula as above or nonparametric bootstrap (for segmented regression).

Table 6.4.2: Model Selection Results Using Single Virus-Specific Antibody to Predict Post Challenge Viral Load - Binary

| Virus-Specific Antibody                | Binary Viral Load                        | Model Selected | Adjusted CoD | Figure Number |
|----------------------------------------|------------------------------------------|----------------|--------------|---------------|
| log MSD ECL 2 weeks prior challenge    | bin VL Day2 PostChallenge NasalSwab N1   | ns5            | 1.000        | 6.4.131       |
| log MSD ECL day challenge              | bin VL Day2 PostChallenge NasalSwab N1   | ns5            | 1.000        | 6.4.132       |
| log PsVNA ID50 2 weeks prior challenge | bin VL Day2 PostChallenge NasalSwab N1   | ns5            | 1.000        | 6.4.133       |
| log PsVNA ID50 day challenge           | bin VL Day2 PostChallenge NasalSwab N1   | ns5            | 1.000        | 6.4.134       |
| log PsVNA ID80 2 weeks prior challenge | bin VL Day2 PostChallenge NasalSwab N1   | ns5            | 1.000        | 6.4.135       |
| log PsVNA ID80 day challenge           | bin VL Day2 PostChallenge NasalSwab N1   | ns5            | 1.000        | 6.4.136       |
| log MN day challenge                   | bin VL Day2 PostChallenge NasalSwab N1   | ns5            | 0.475        | 6.4.130       |
| log MSD ECL 2 weeks prior challenge    | bin VL Day2 PostChallenge BAL Subgenomic | ns5            | 0.280        | 6.4.107       |
| log MSD ECL 2 weeks prior challenge    | bin VL Day2 PostChallenge BAL N1         | log            | 0.259        | 6.4.99        |
| log MSD ECL day challenge              | bin VL Day2 PostChallenge BAL Subgenomic | ns5            | 0.250        | 6.4.108       |
| log PsVNA ID50 2 weeks prior challenge | bin VL Day2 PostChallenge BAL Subgenomic | log            | 0.223        | 6.4.109       |

Table 6.4.2: Model Selection Results Using Single Virus-Specific Antibody to Predict Post Challenge Viral Load - Binary (*continued*)

| Virus-Specific Antibody                | Binary Viral Load                                       | Model Selected | Adjusted CoD | Figure Number |
|----------------------------------------|---------------------------------------------------------|----------------|--------------|---------------|
| log PsVNA ID80 day challenge           | bin VL Day2<br>PostChallenge<br>NasalSwab<br>Subgenomic | ns5            | 0.223        | 6.4.144       |
| log PsVNA ID50 day challenge           | bin VL Day2<br>PostChallenge<br>NasalSwab<br>Subgenomic | ns5            | 0.216        | 6.4.142       |
| log MSD ECL day challenge              | bin VL Day2<br>PostChallenge<br>OPswab<br>Subgenomic    | ns5            | 0.215        | 6.4.124       |
| log MN day challenge                   | bin VL Day2<br>PostChallenge<br>BAL Subgenomic          | log            | 0.209        | 6.4.106       |
| log PsVNA ID80 2 weeks prior challenge | bin VL Day2<br>PostChallenge<br>BAL Subgenomic          | log            | 0.203        | 6.4.111       |
| log MN 2 weeks prior challenge         | bin VL Day2<br>PostChallenge<br>OPswab<br>Subgenomic    | ns5            | 0.203        | 6.4.121       |
| log PsVNA ID80 day challenge           | bin VL Day2<br>PostChallenge<br>BAL Subgenomic          | log            | 0.199        | 6.4.112       |
| log MSD ECL 2 weeks prior challenge    | bin VL Day2<br>PostChallenge<br>OPswab<br>Subgenomic    | seg            | 0.194        | 6.4.123       |
| log MN day challenge                   | bin VL Day2<br>PostChallenge<br>NasalSwab<br>Subgenomic | ns5            | 0.188        | 6.4.138       |
| log MN 2 weeks prior challenge         | bin VL Day2<br>PostChallenge<br>BAL Subgenomic          | log            | 0.179        | 6.4.105       |
| log PsVNA ID80 2 weeks prior challenge | bin VL Day2<br>PostChallenge<br>NasalSwab<br>Subgenomic | log            | 0.174        | 6.4.143       |
| log PsVNA ID50 2 weeks prior challenge | bin VL Day2<br>PostChallenge<br>NasalSwab<br>Subgenomic | log            | 0.173        | 6.4.141       |

Table 6.4.2: Model Selection Results Using Single Virus-Specific Antibody to Predict Post Challenge Viral Load - Binary (*continued*)

| Virus-Specific Antibody                | Binary Viral Load                                       | Model Selected | Adjusted CoD | Figure Number |
|----------------------------------------|---------------------------------------------------------|----------------|--------------|---------------|
| log MN 2 weeks prior challenge         | bin VL Day2<br>PostChallenge<br>NasalSwab<br>Subgenomic | log            | 0.168        | 6.4.137       |
| log PsVNA ID50 day challenge           | bin VL Day2<br>PostChallenge<br>BAL Subgenomic          | log            | 0.164        | 6.4.110       |
| log MN 2 weeks prior challenge         | bin VL Day2<br>PostChallenge<br>OPswab N1               | log            | 0.162        | 6.4.113       |
| log MSD ECL 2 weeks prior challenge    | bin VL Day2<br>PostChallenge<br>NasalSwab<br>Subgenomic | log            | 0.160        | 6.4.139       |
| log MSD ECL day challenge              | bin VL Day2<br>PostChallenge<br>BAL N1                  | log            | 0.157        | 6.4.100       |
| log MSD ECL 2 weeks prior challenge    | bin VL Day2<br>PostChallenge<br>OPswab N1               | log            | 0.153        | 6.4.115       |
| log MSD ECL day challenge              | bin VL Day2<br>PostChallenge<br>OPswab N1               | log            | 0.153        | 6.4.116       |
| log PsVNA ID80 day challenge           | bin VL Day2<br>PostChallenge<br>BAL N1                  | log            | 0.152        | 6.4.104       |
| log PsVNA ID80 2 weeks prior challenge | bin VL Day2<br>PostChallenge<br>OPswab<br>Subgenomic    | log            | 0.152        | 6.4.127       |
| log PsVNA ID50 2 weeks prior challenge | bin VL Day2<br>PostChallenge<br>OPswab<br>Subgenomic    | log            | 0.149        | 6.4.125       |
| log PsVNA ID80 day challenge           | bin VL Day2<br>PostChallenge<br>OPswab<br>Subgenomic    | log            | 0.149        | 6.4.128       |
| log MN day challenge                   | bin VL Day2<br>PostChallenge<br>OPswab<br>Subgenomic    | seg            | 0.143        | 6.4.122       |
| log MN day challenge                   | bin VL Day2<br>PostChallenge<br>BAL N1                  | log            | 0.141        | 6.4.98        |

Table 6.4.2: Model Selection Results Using Single Virus-Specific Antibody to Predict Post Challenge Viral Load - Binary (*continued*)

| Virus-Specific Antibody                | Binary Viral Load                              | Model Selected | Adjusted CoD | Figure Number |
|----------------------------------------|------------------------------------------------|----------------|--------------|---------------|
| log PsVNA ID50 day challenge           | bin VL Day2 PostChallenge OPswab Subgenomic    | log            | 0.140        | 6.4.126       |
| log MSD ECL day challenge              | bin VL Day2 PostChallenge NasalSwab Subgenomic | log            | 0.134        | 6.4.140       |
| log PsVNA ID80 day challenge           | bin VL Day2 PostChallenge OPswab N1            | log            | 0.131        | 6.4.120       |
| log PsVNA ID80 2 weeks prior challenge | bin VL Day2 PostChallenge BAL N1               | log            | 0.124        | 6.4.103       |
| log PsVNA ID80 2 weeks prior challenge | bin VL Day2 PostChallenge OPswab N1            | log            | 0.116        | 6.4.119       |
| log PsVNA ID50 2 weeks prior challenge | bin VL Day2 PostChallenge BAL N1               | log            | 0.110        | 6.4.101       |
| log PsVNA ID50 day challenge           | bin VL Day2 PostChallenge OPswab N1            | log            | 0.110        | 6.4.118       |
| log MN day challenge                   | bin VL Day2 PostChallenge OPswab N1            | log            | 0.104        | 6.4.114       |
| log MN 2 weeks prior challenge         | bin VL Day2 PostChallenge BAL N1               | log            | 0.101        | 6.4.97        |
| log PsVNA ID50 2 weeks prior challenge | bin VL Day2 PostChallenge OPswab N1            | log            | 0.096        | 6.4.117       |
| log PsVNA ID50 day challenge           | bin VL Day2 PostChallenge BAL N1               | log            | 0.074        | 6.4.102       |
| log MN 2 weeks prior challenge         | bin VL Day2 PostChallenge NasalSwab N1         | log            | 0.007        | 6.4.129       |

There are 32 pairs of virus-specific antibodies/viral loads (out of 48 total pairs) where the best model fit is logistic; 2 where the best model fit is segmented (with 2 breakpoints); and 14 where the best model fit is natural cubic splines with 5 degrees of freedom.

Predicted Values

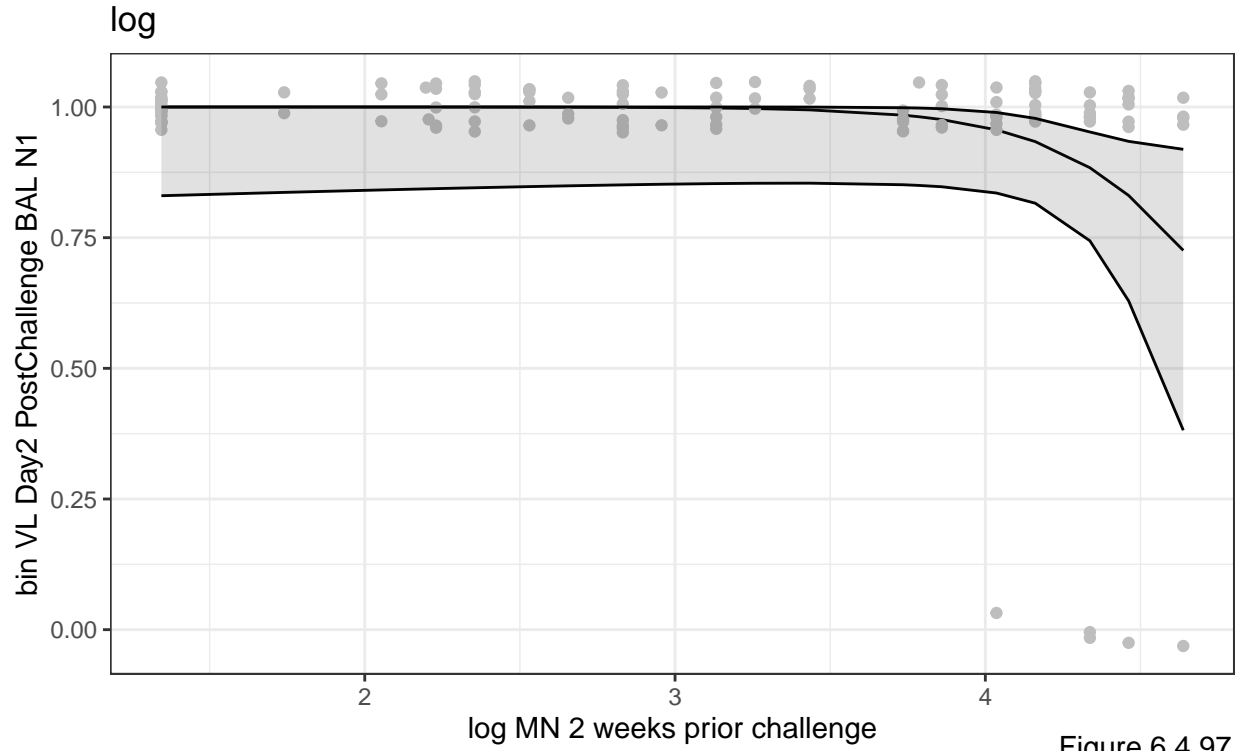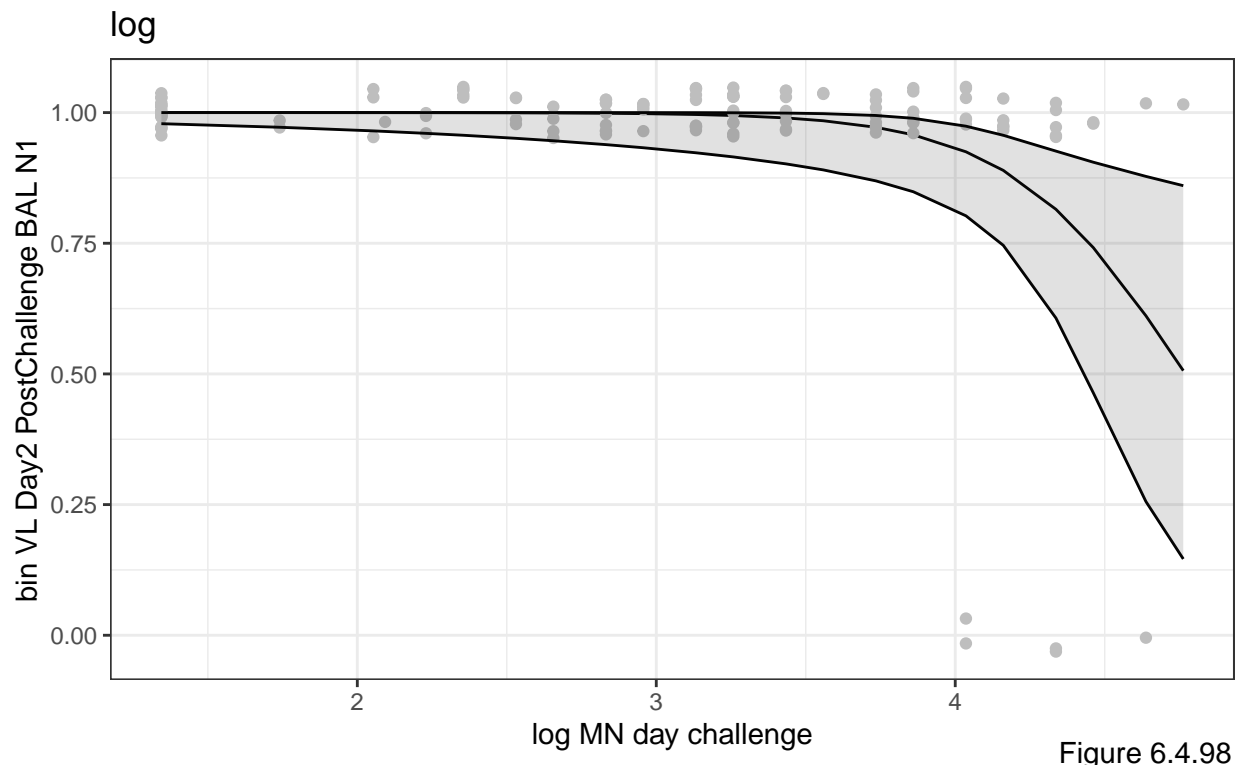

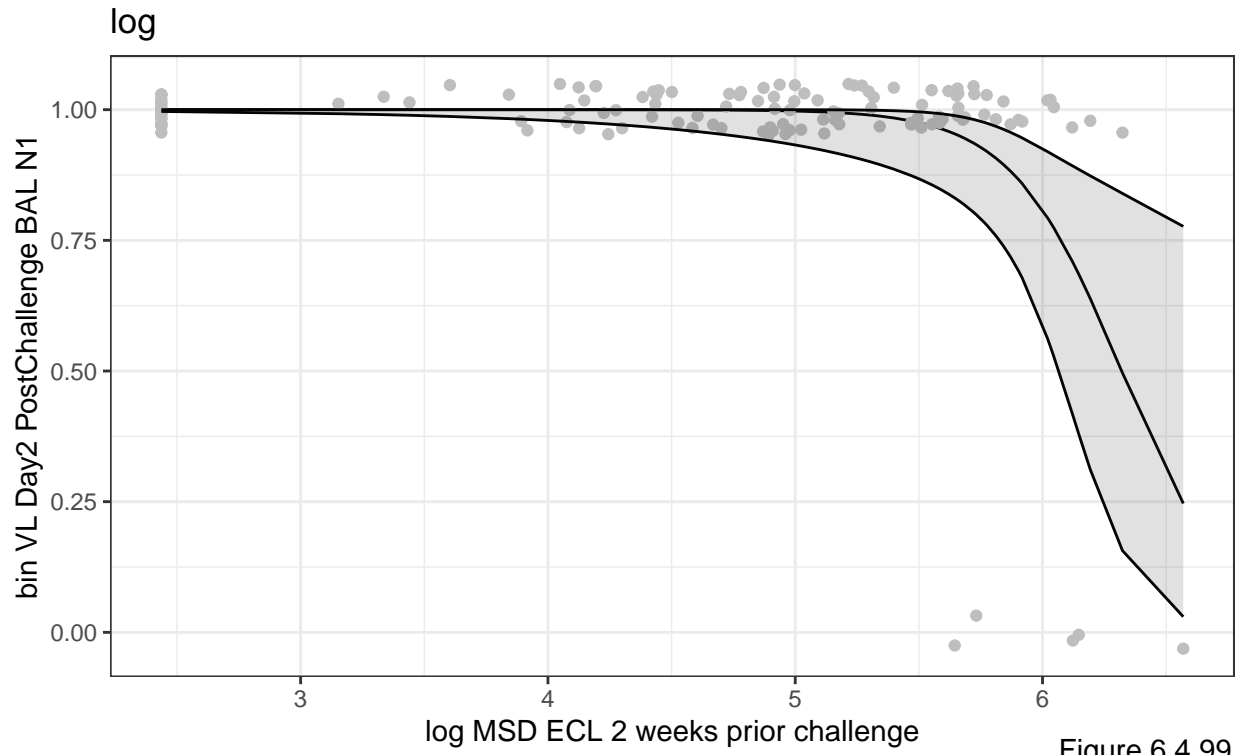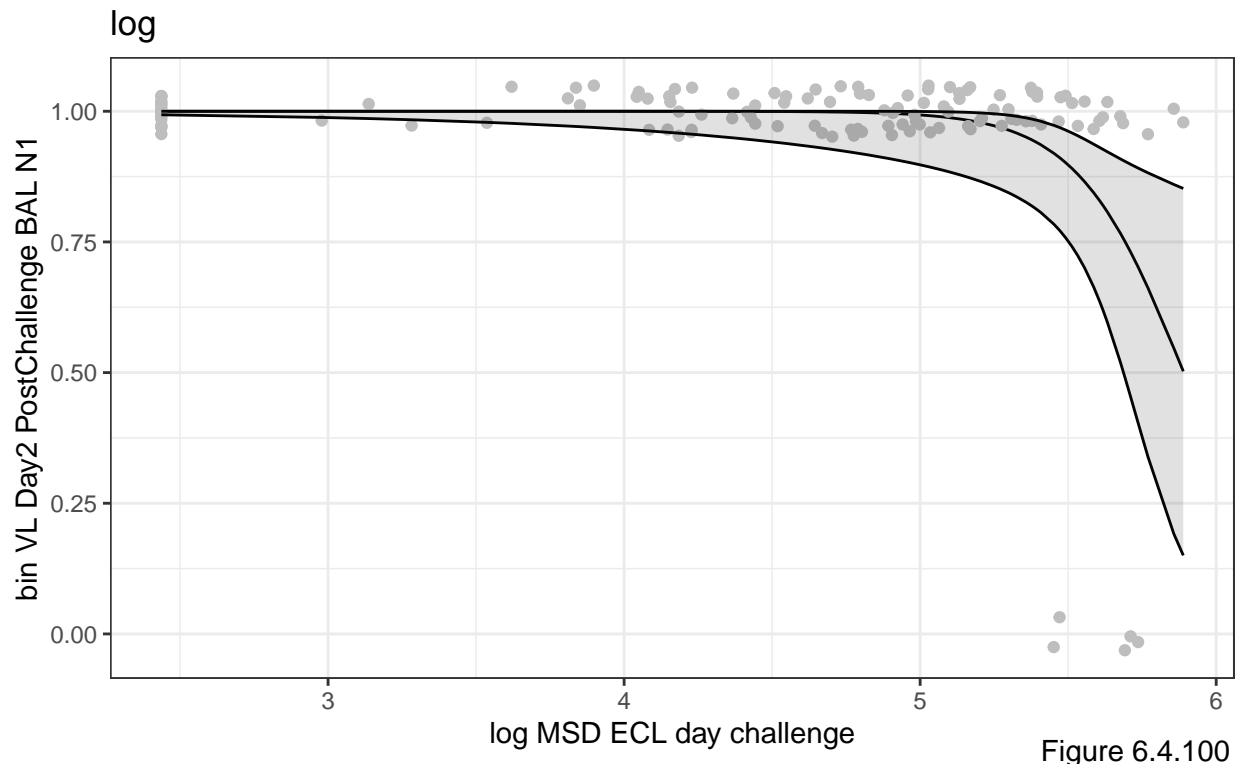

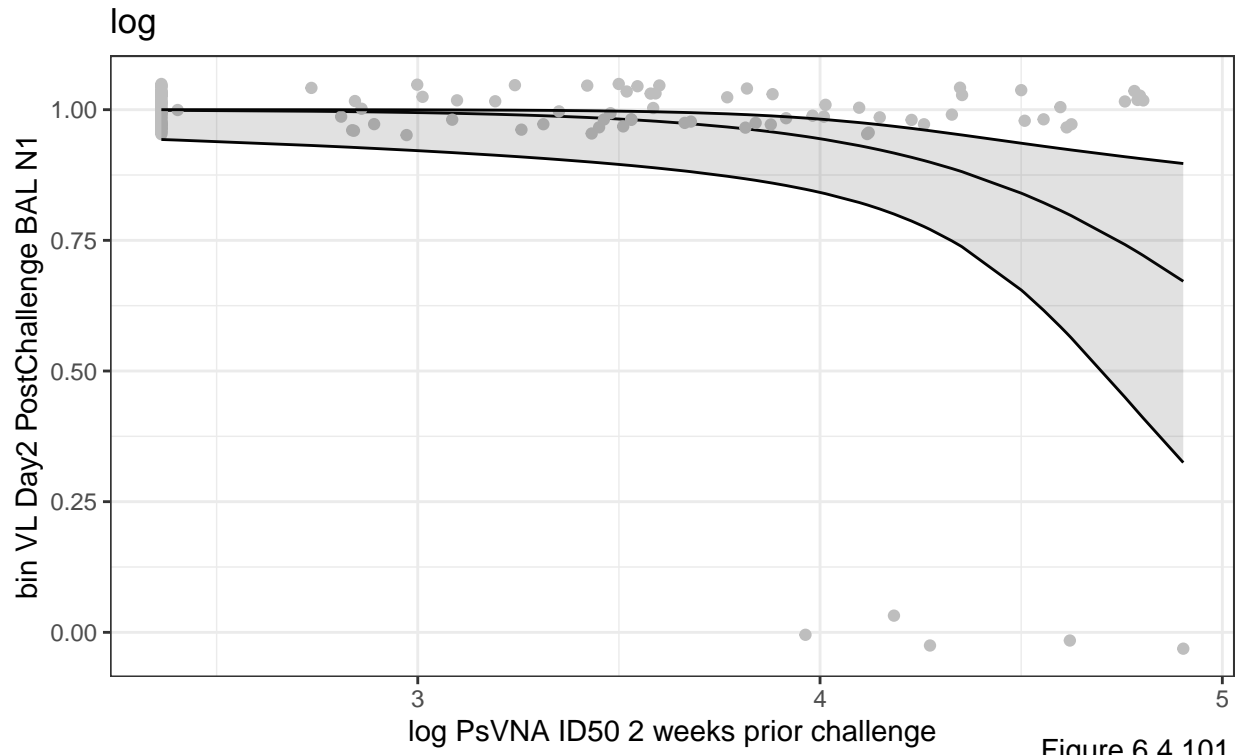

Figure 6.4.101

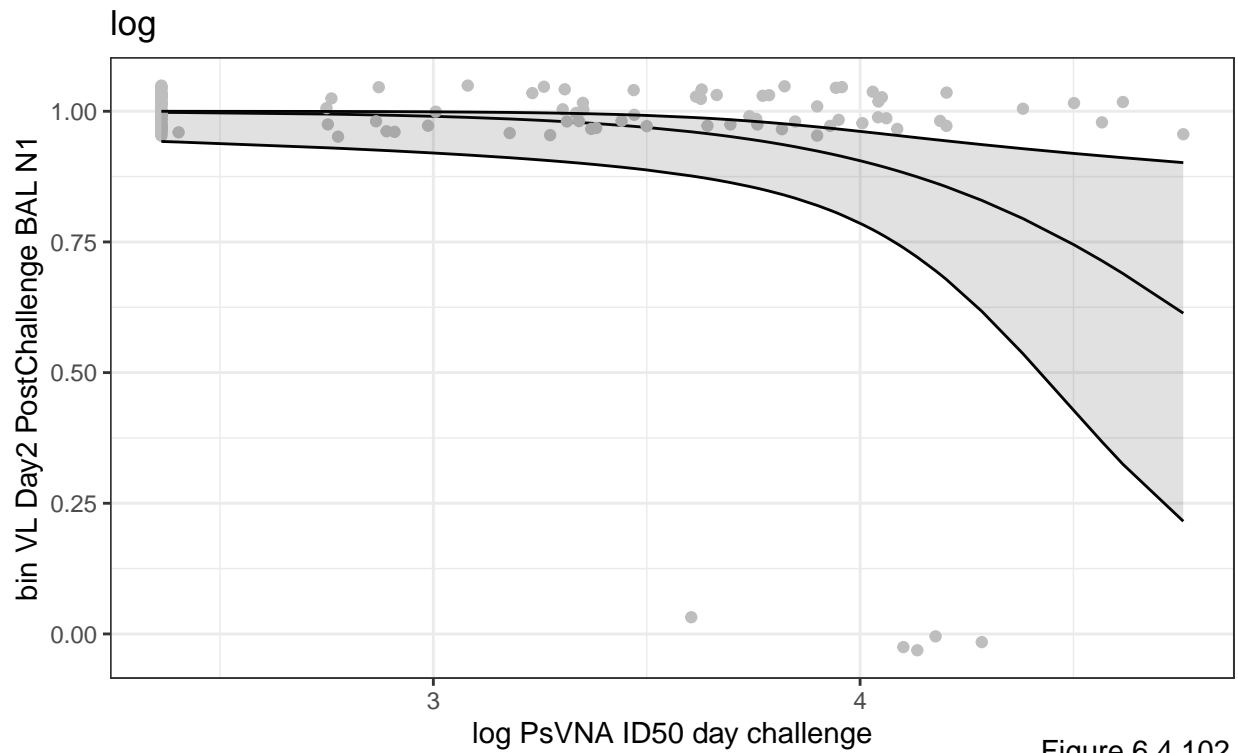

Figure 6.4.102

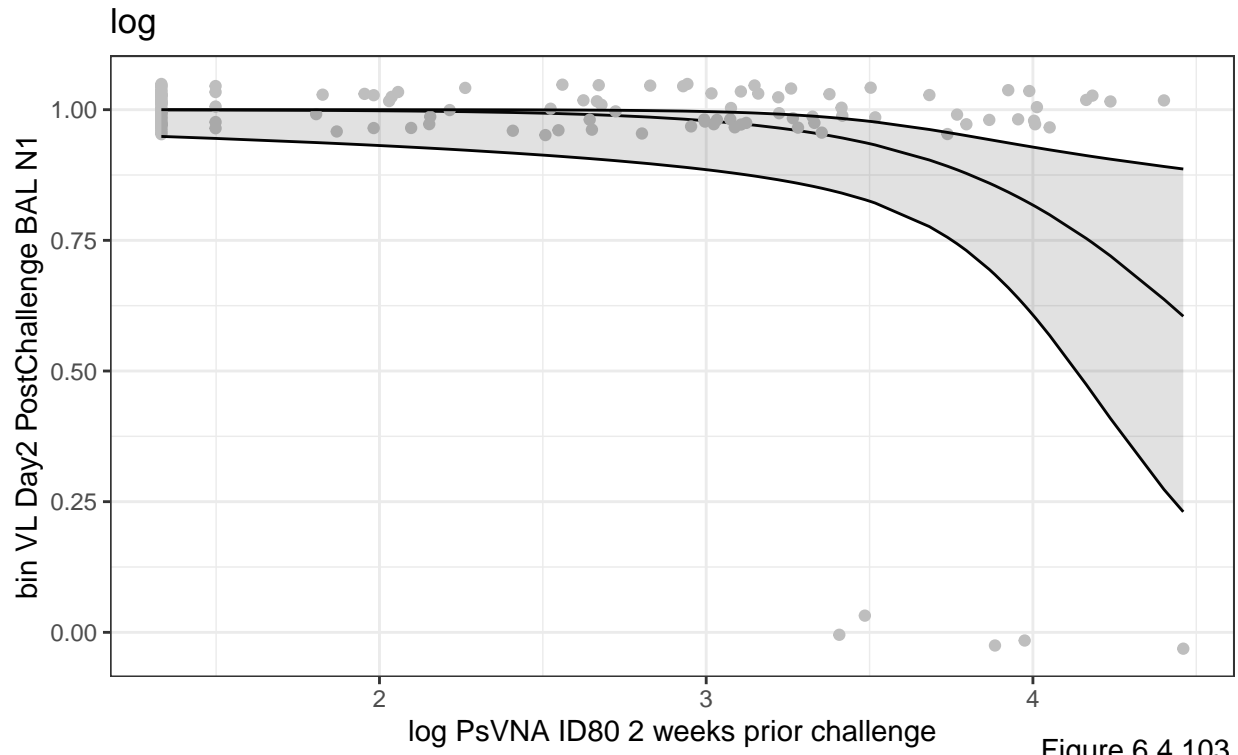

Figure 6.4.103

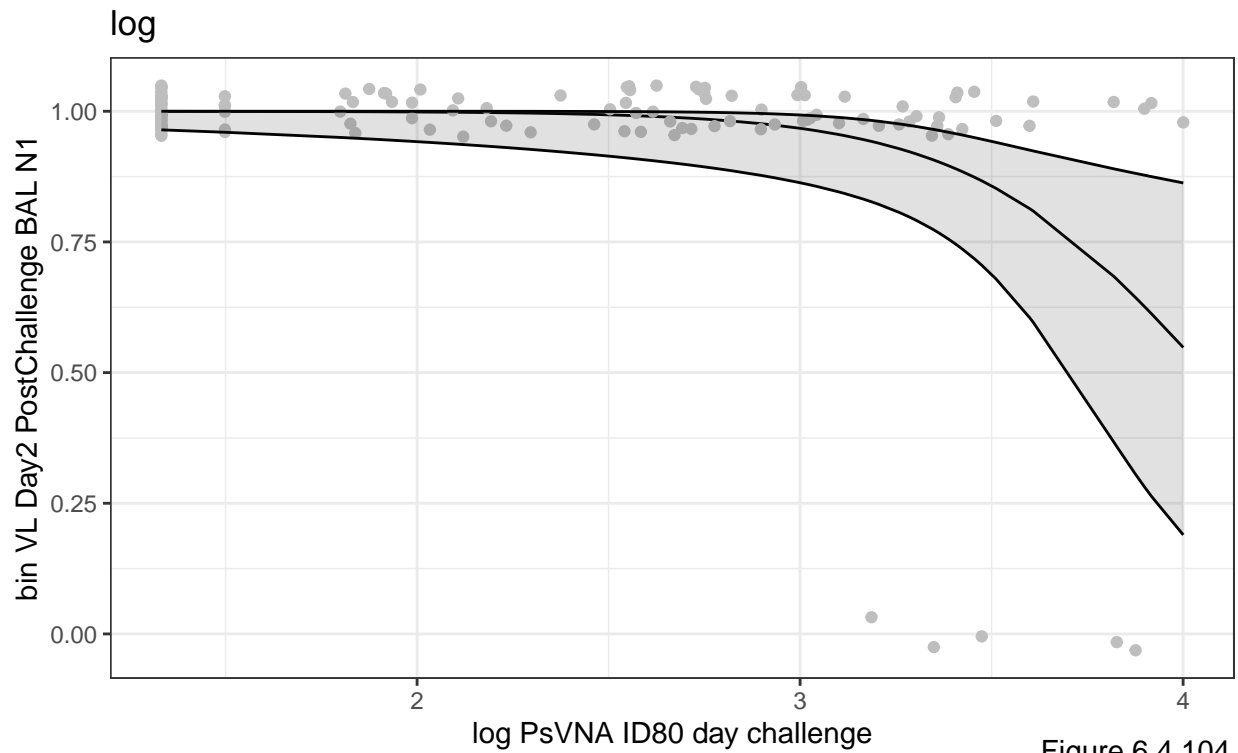

Figure 6.4.104

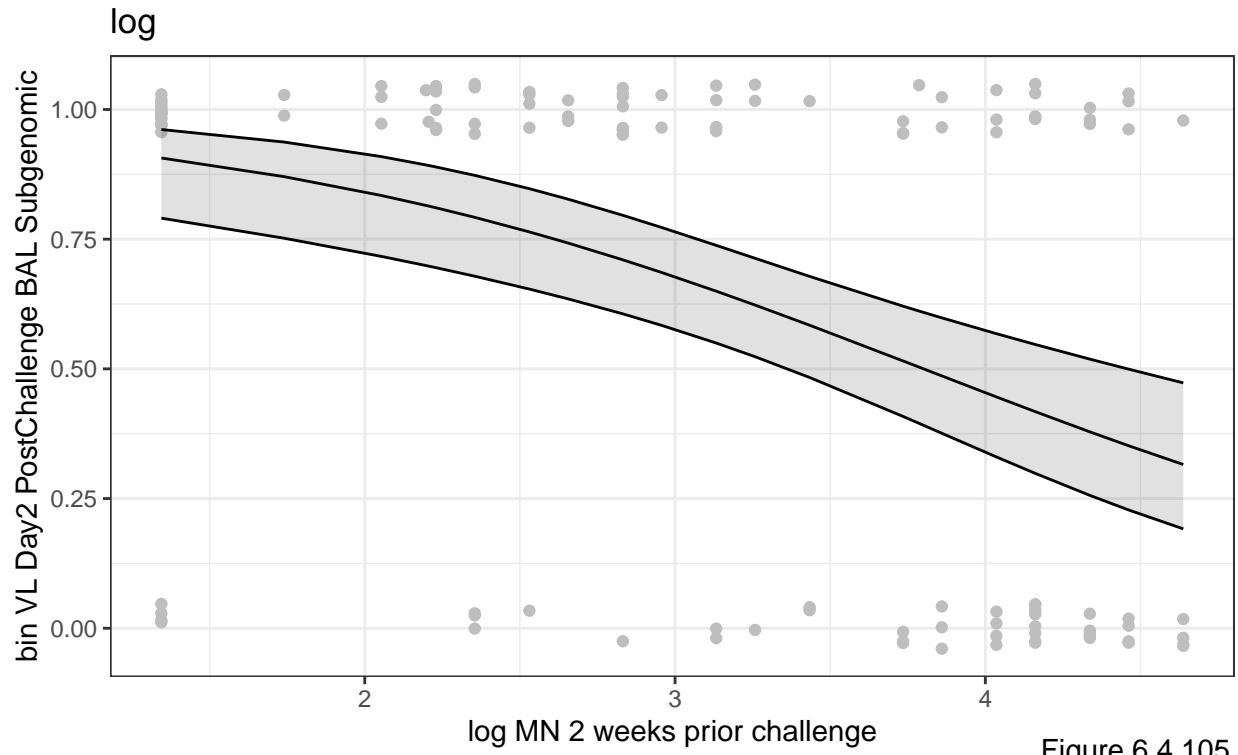

Figure 6.4.105

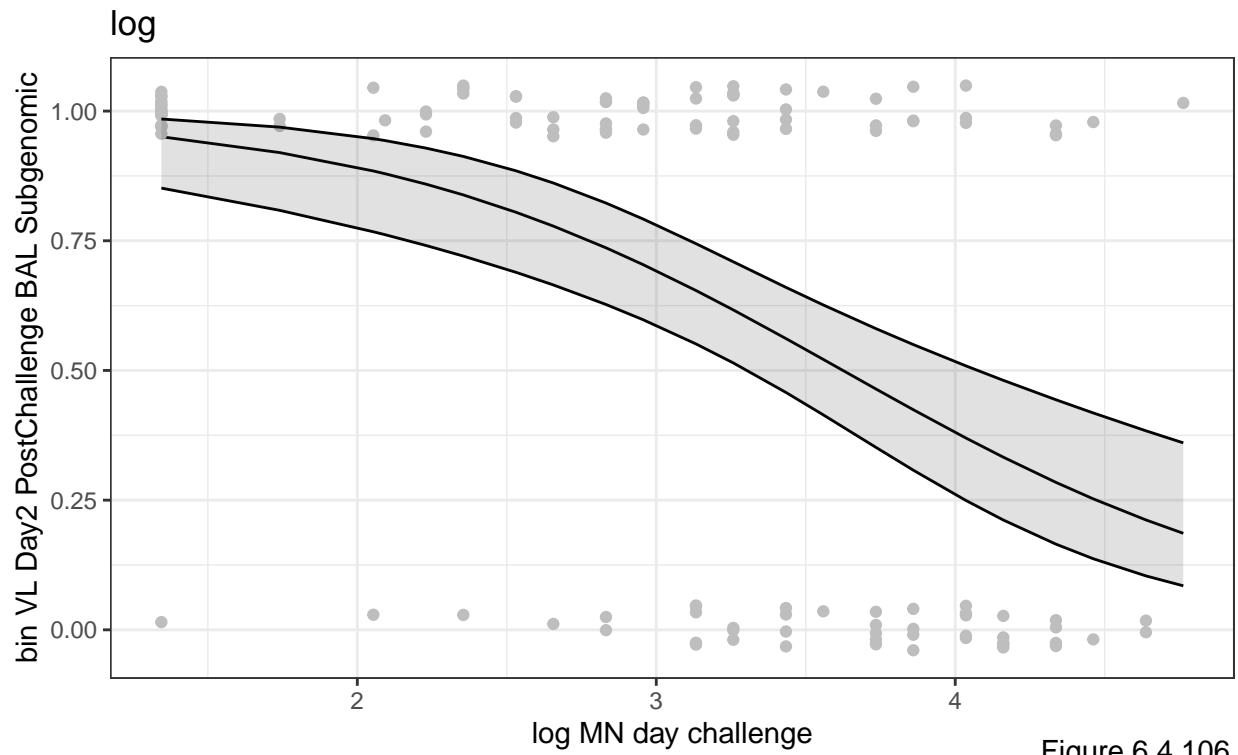

Figure 6.4.106

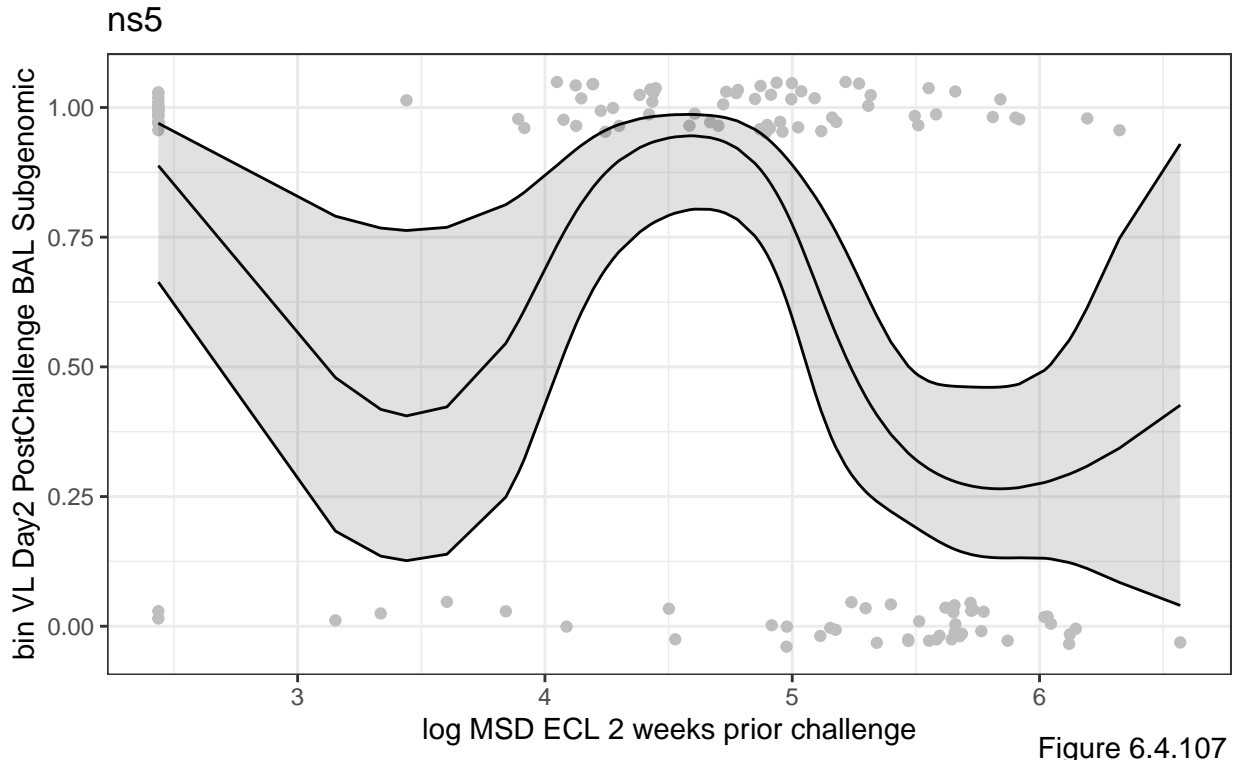

Figure 6.4.107

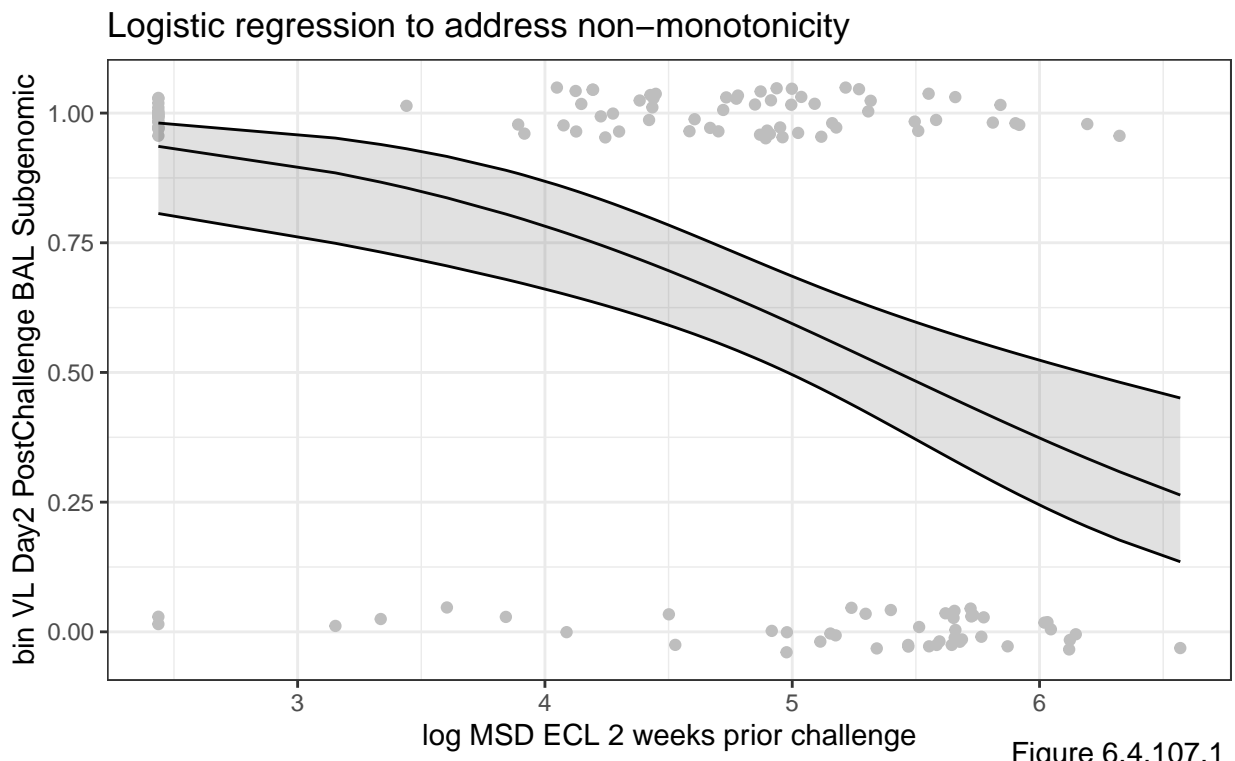

Figure 6.4.107.1

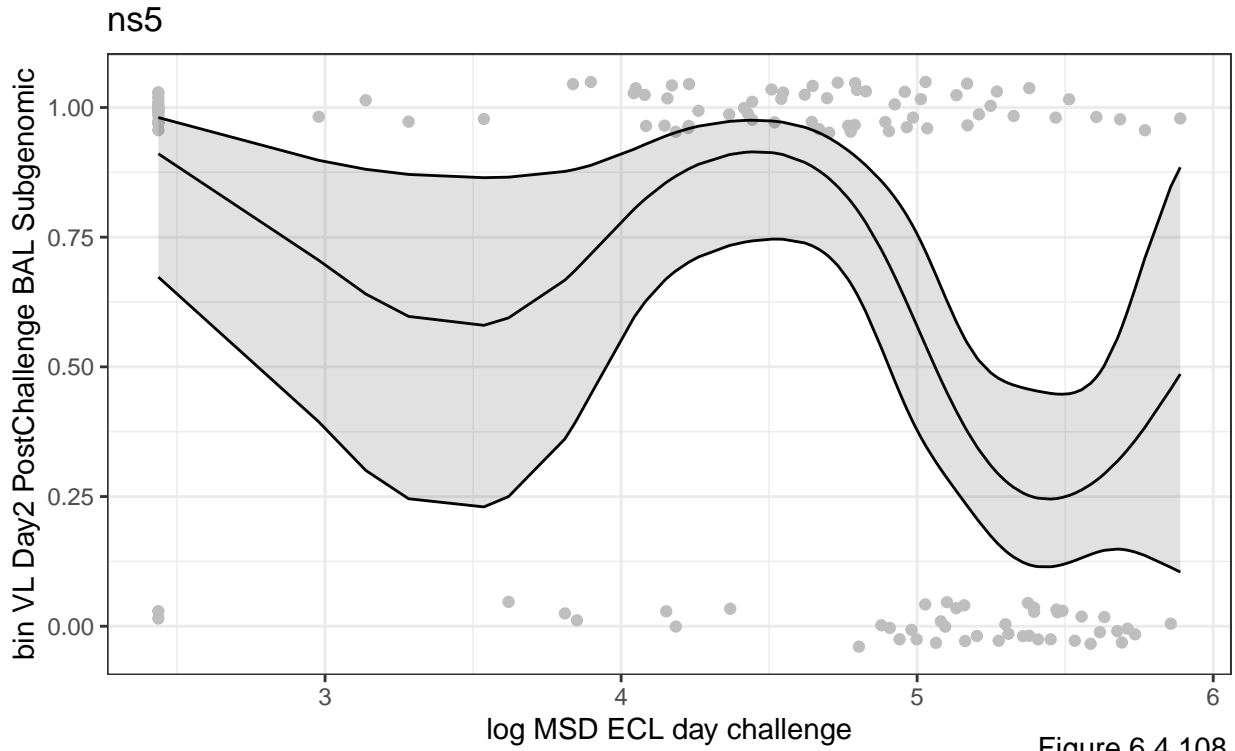

Figure 6.4.108

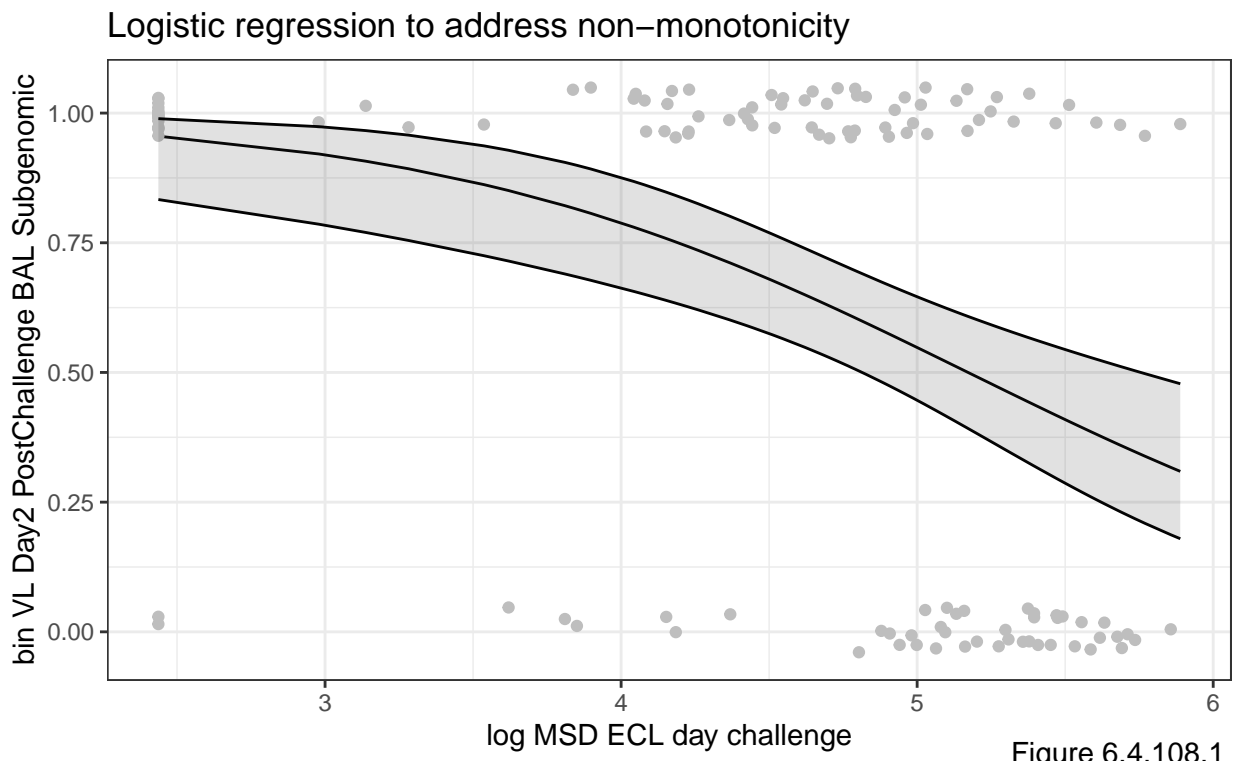

Figure 6.4.108.1

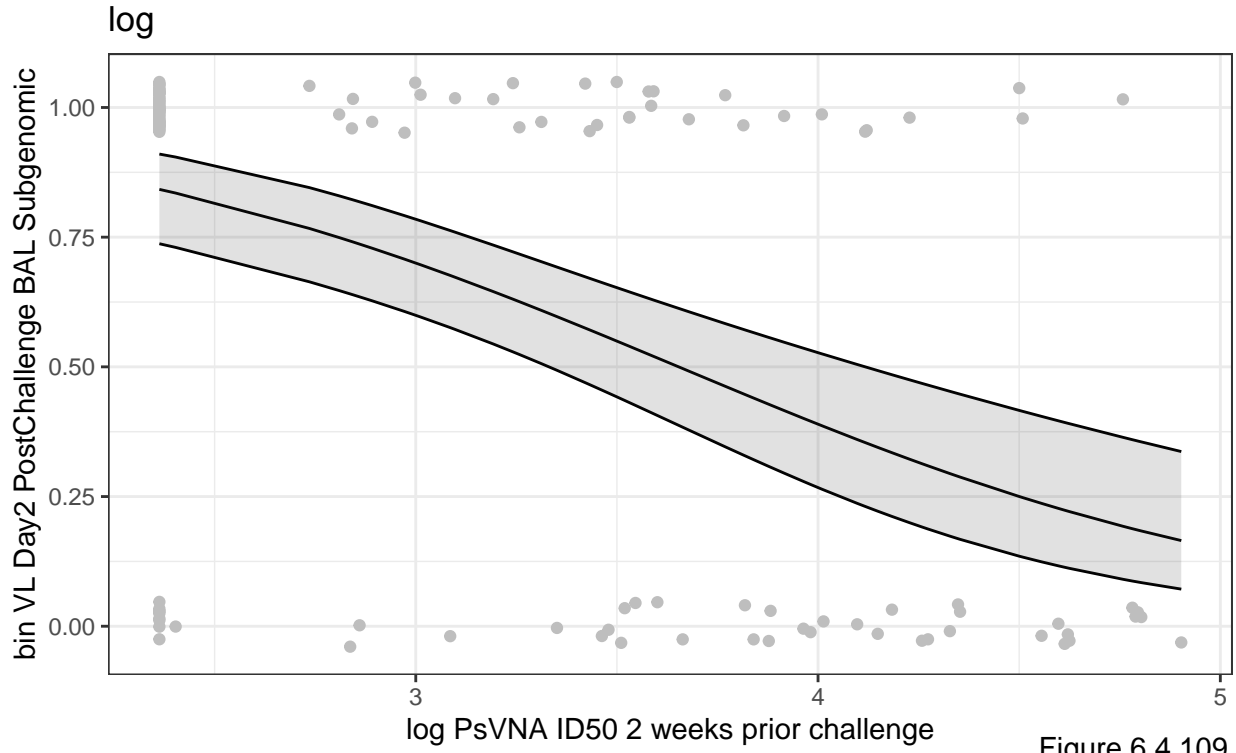

Figure 6.4.109

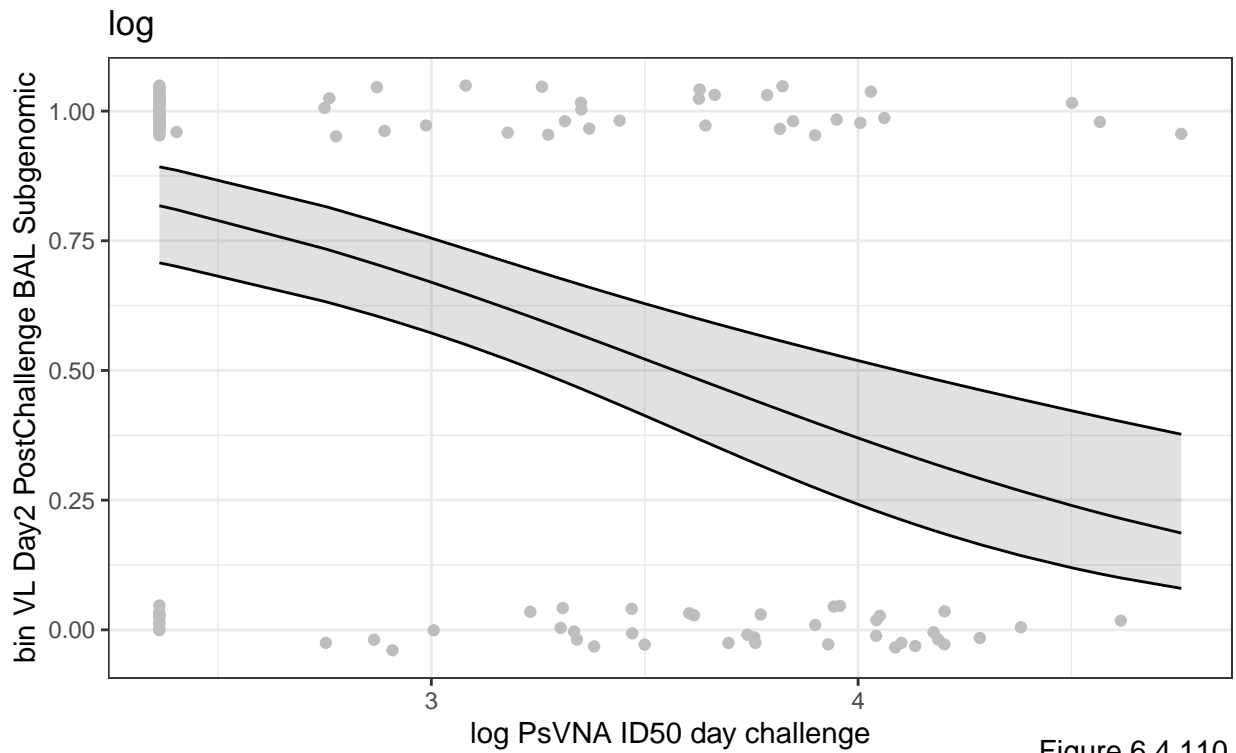

Figure 6.4.110

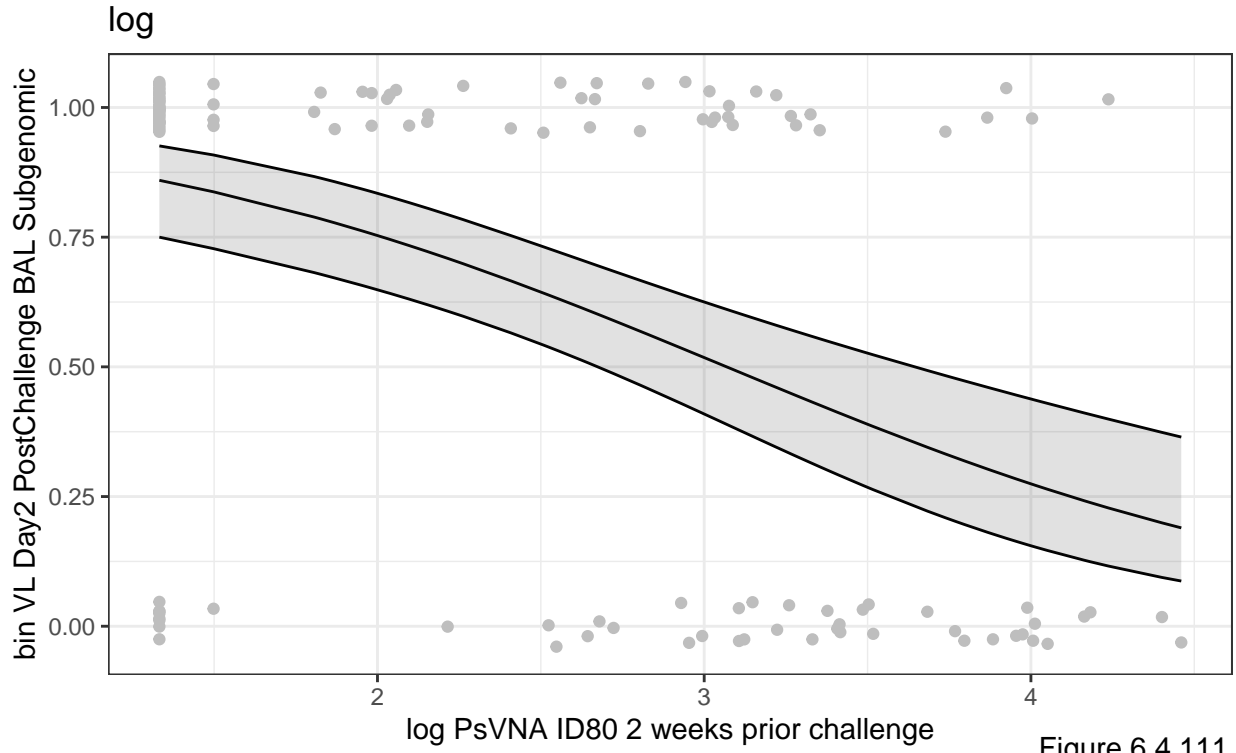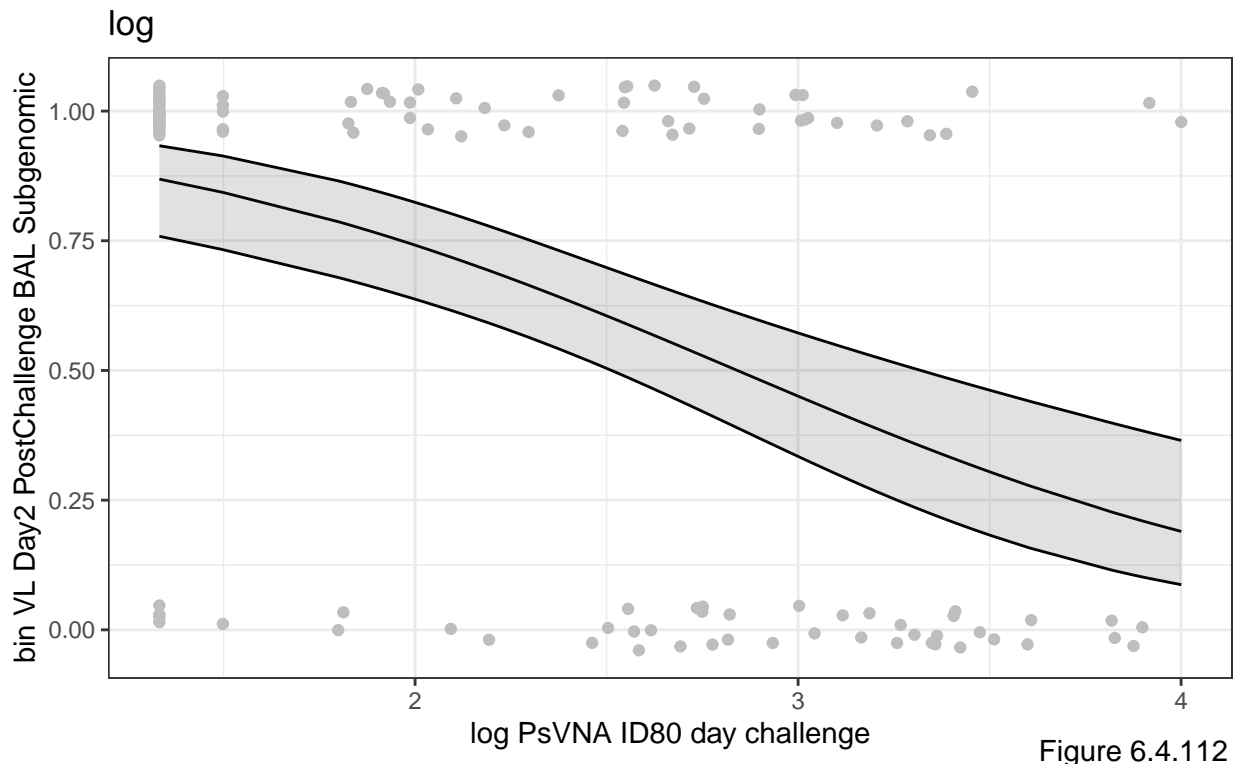

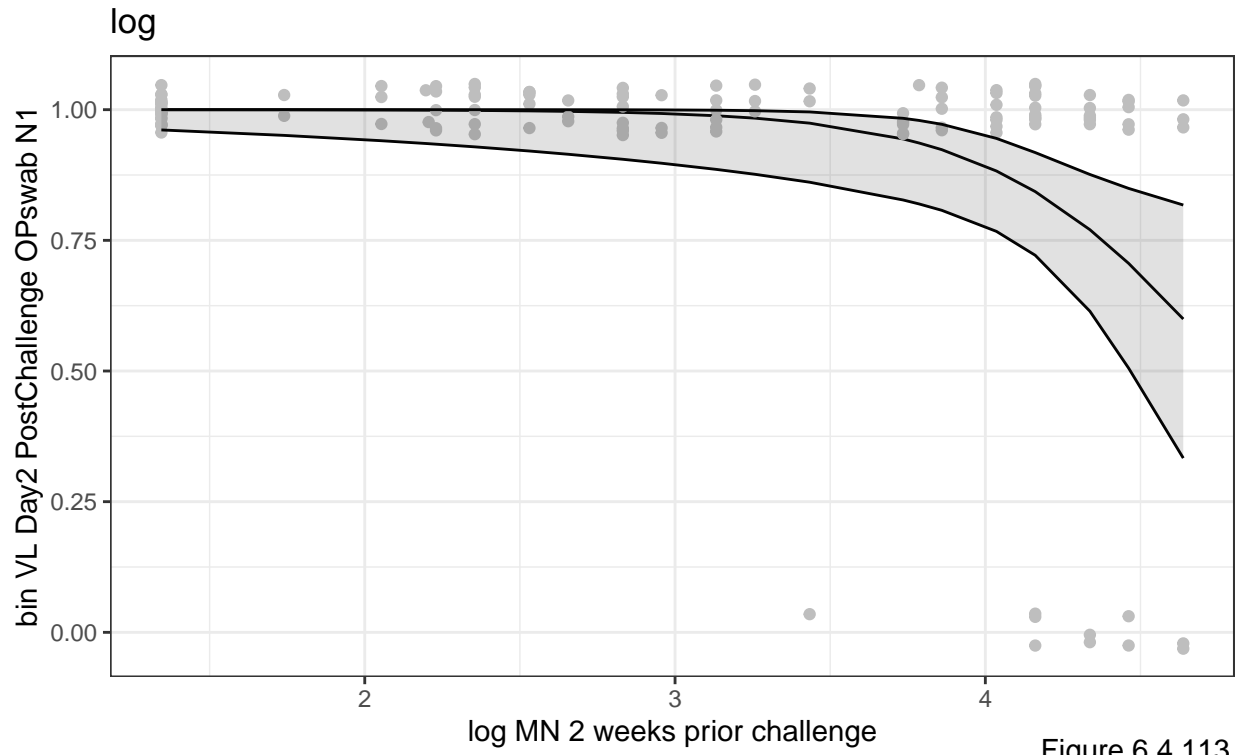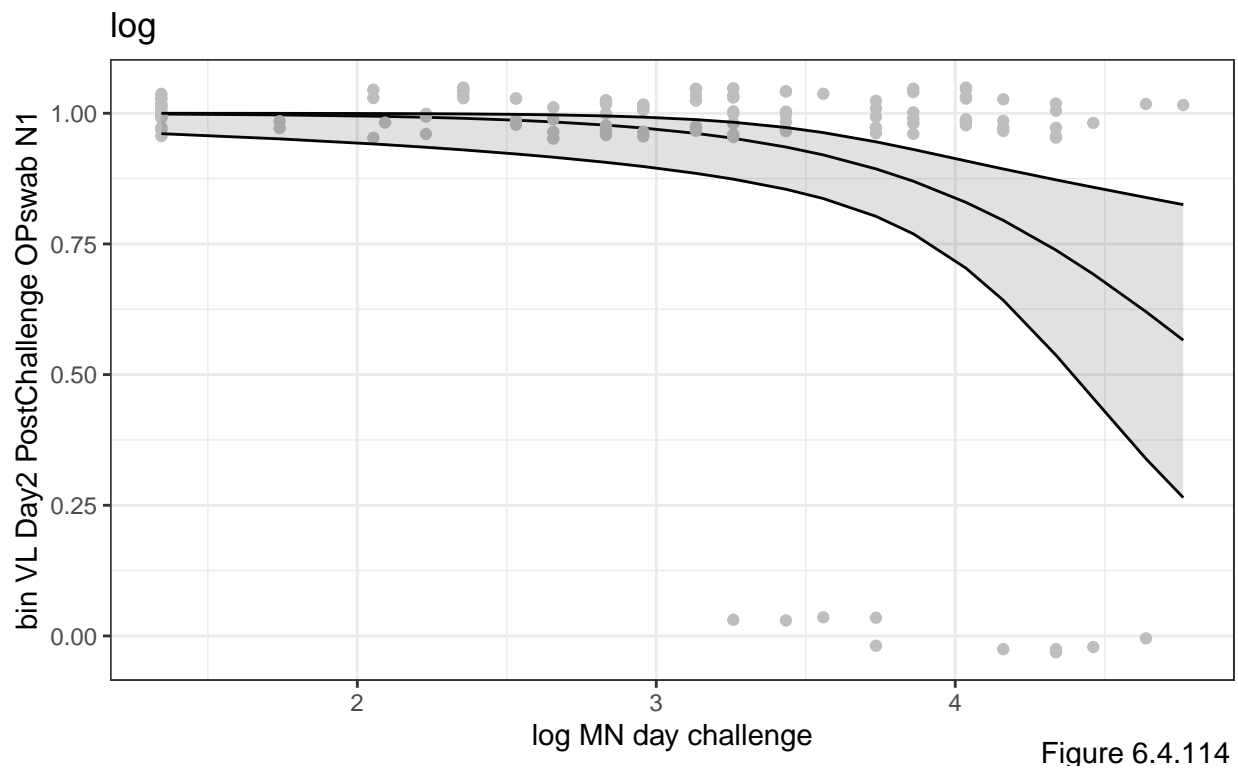

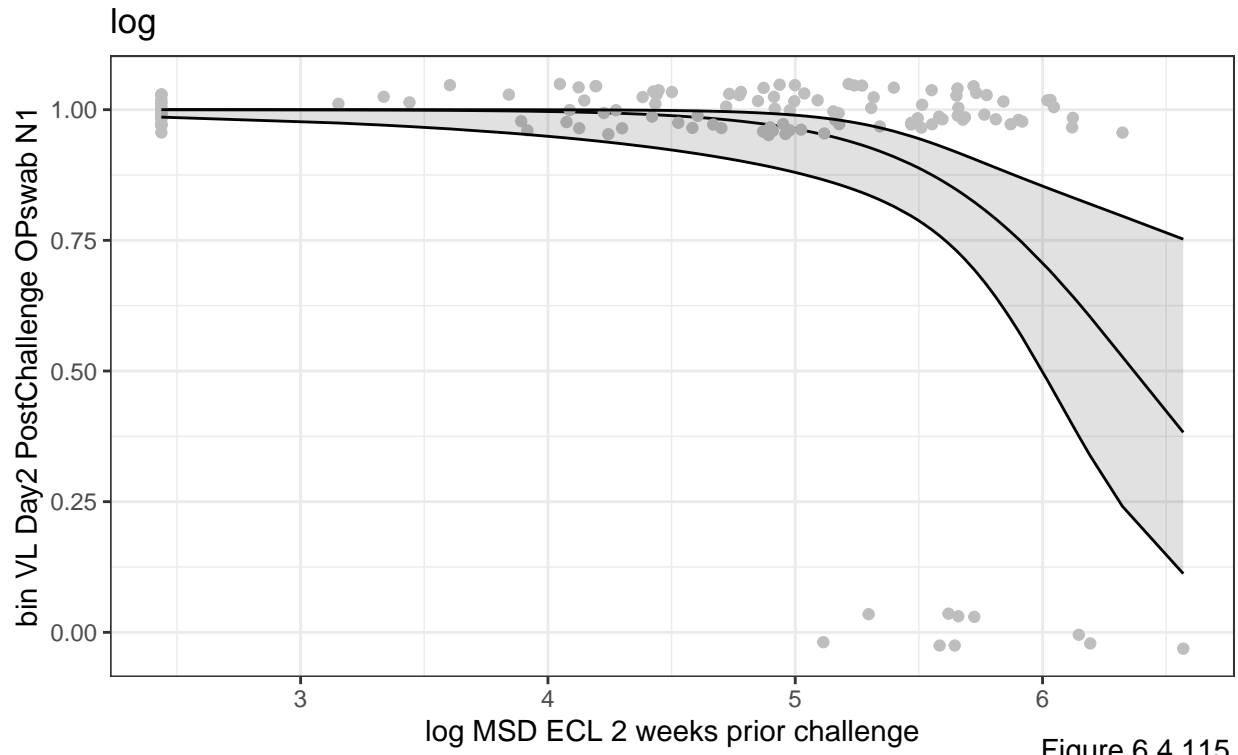

Figure 6.4.115

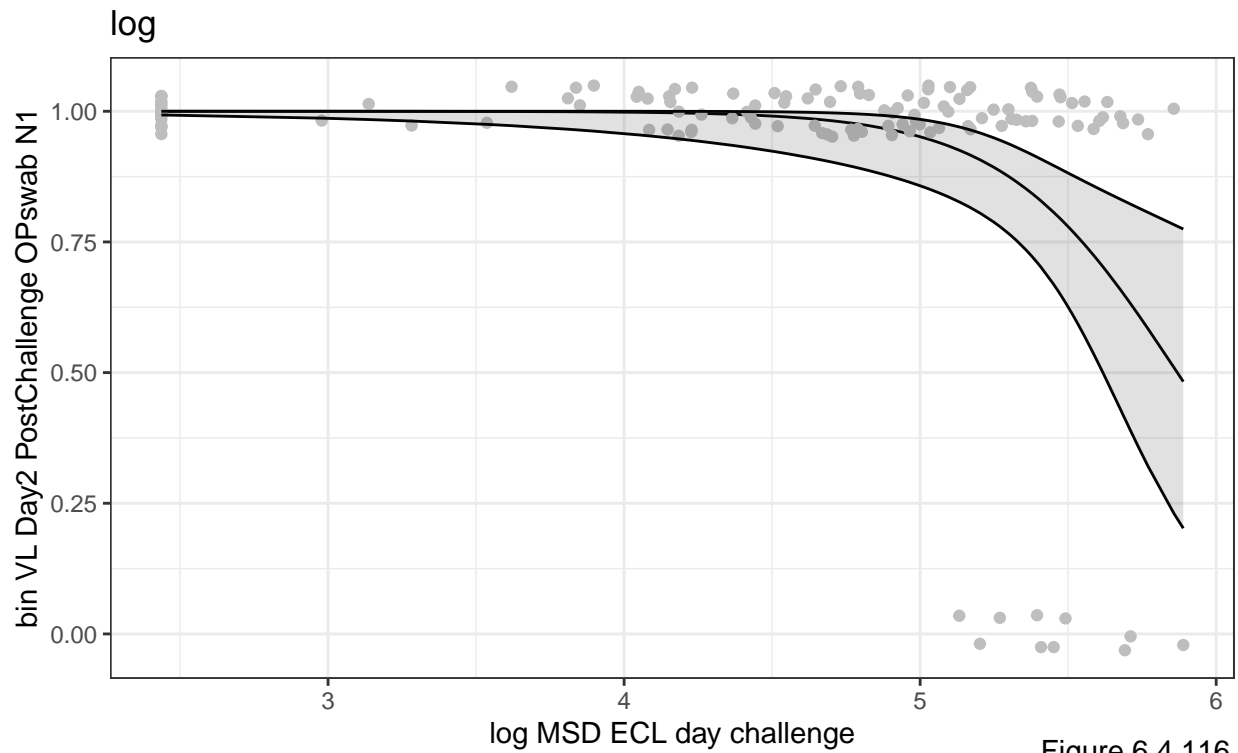

Figure 6.4.116

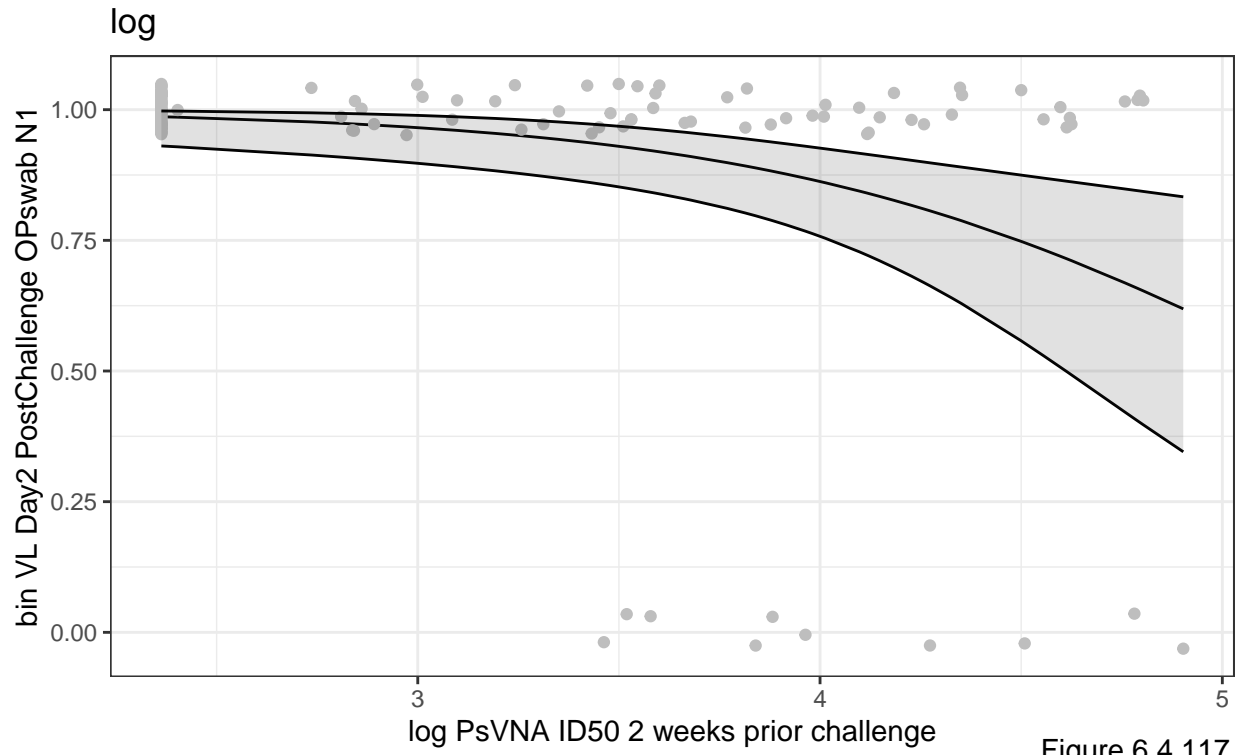

Figure 6.4.117

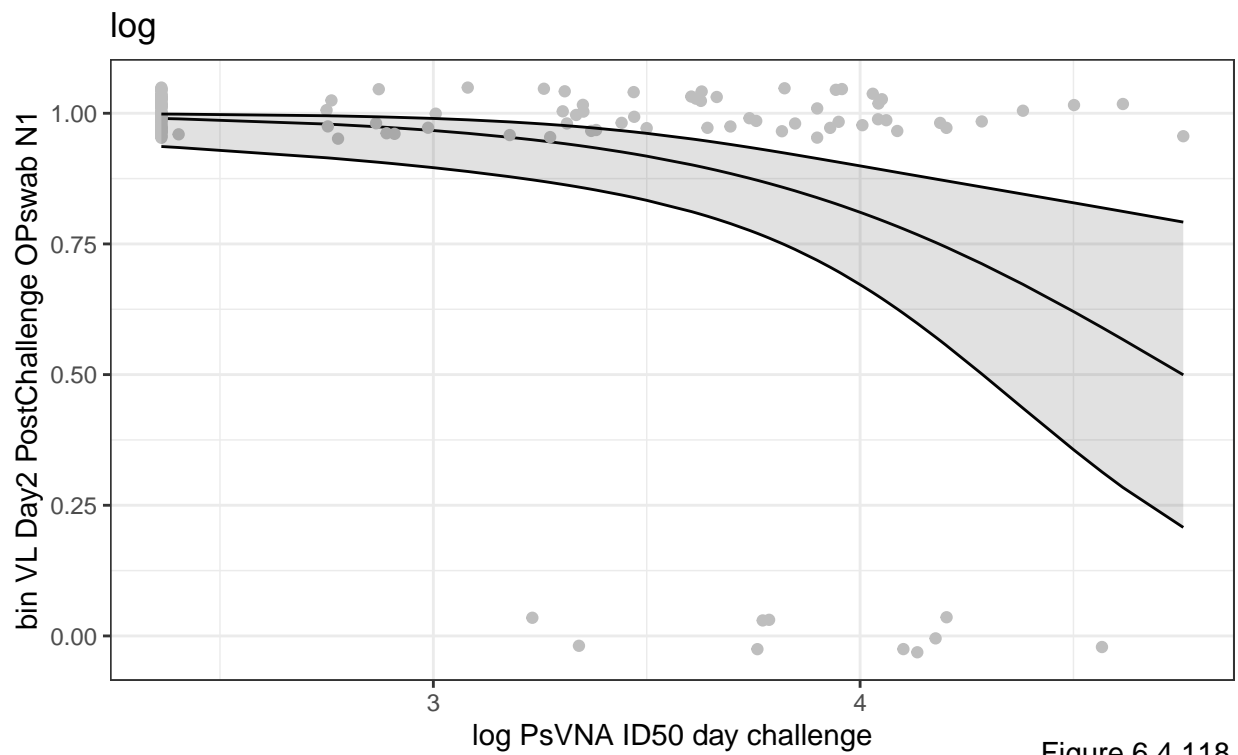

Figure 6.4.118

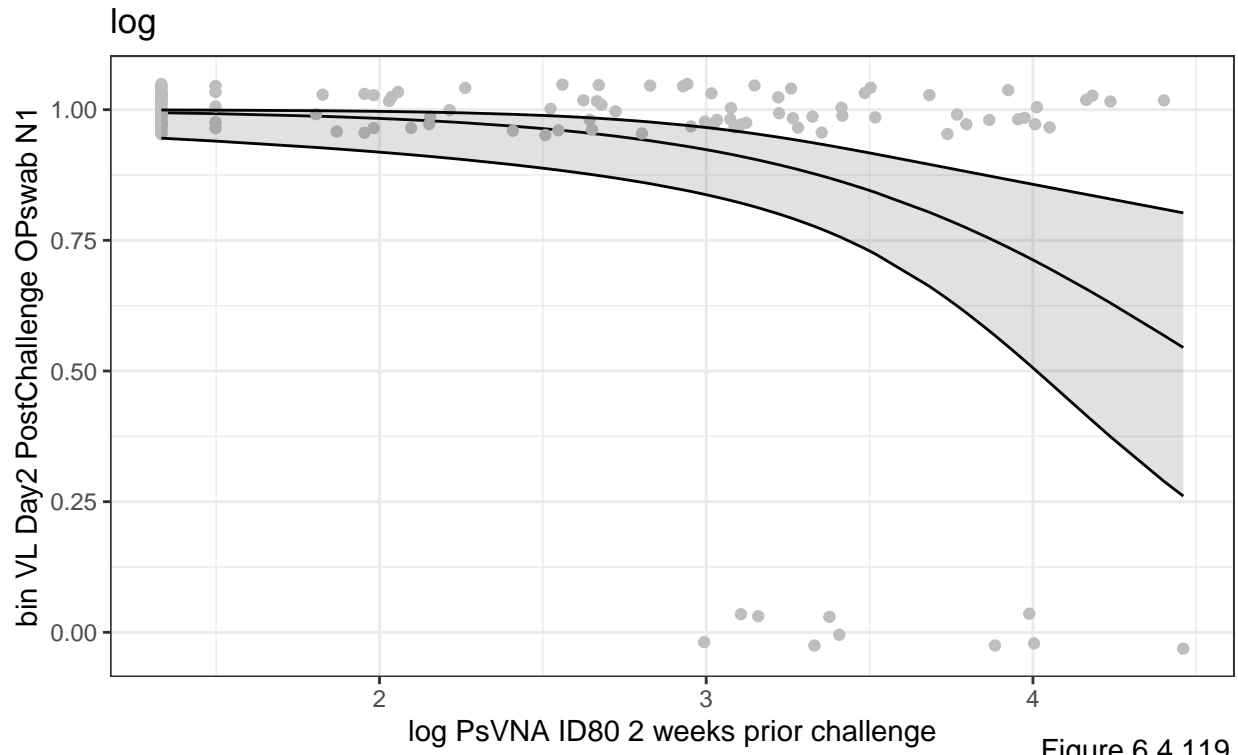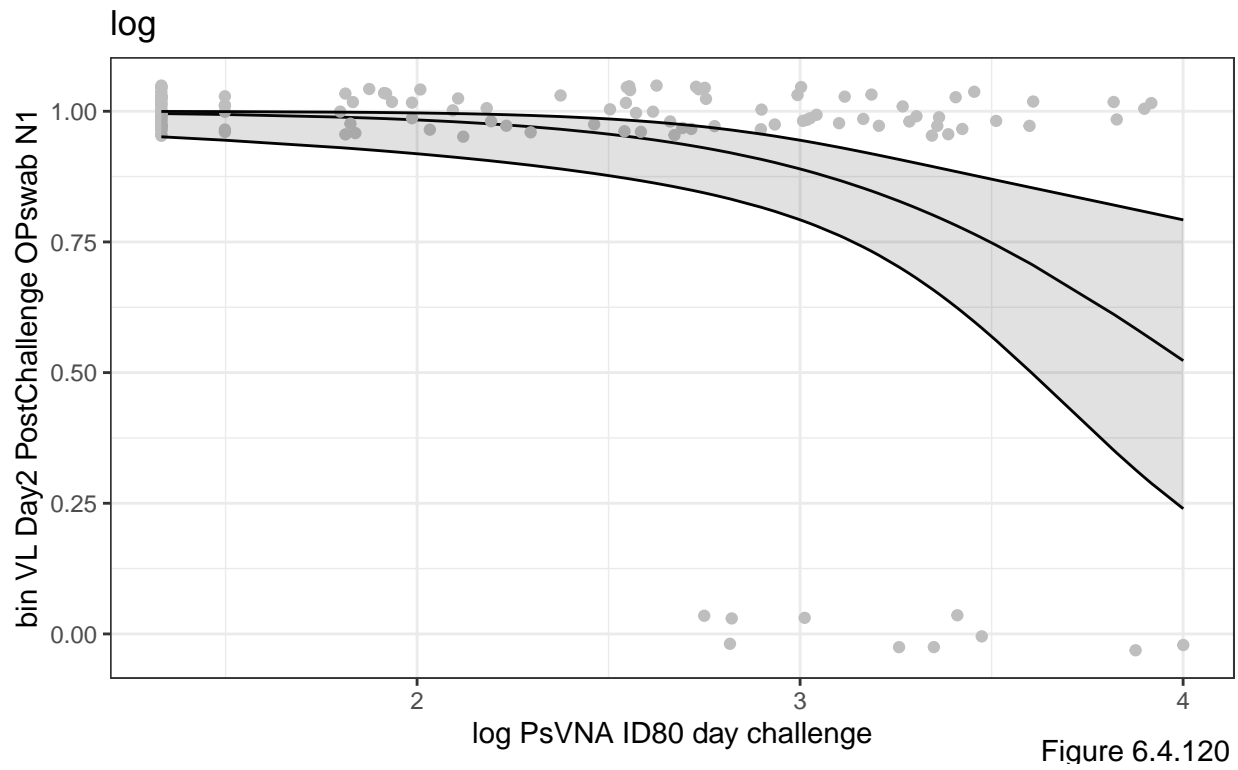

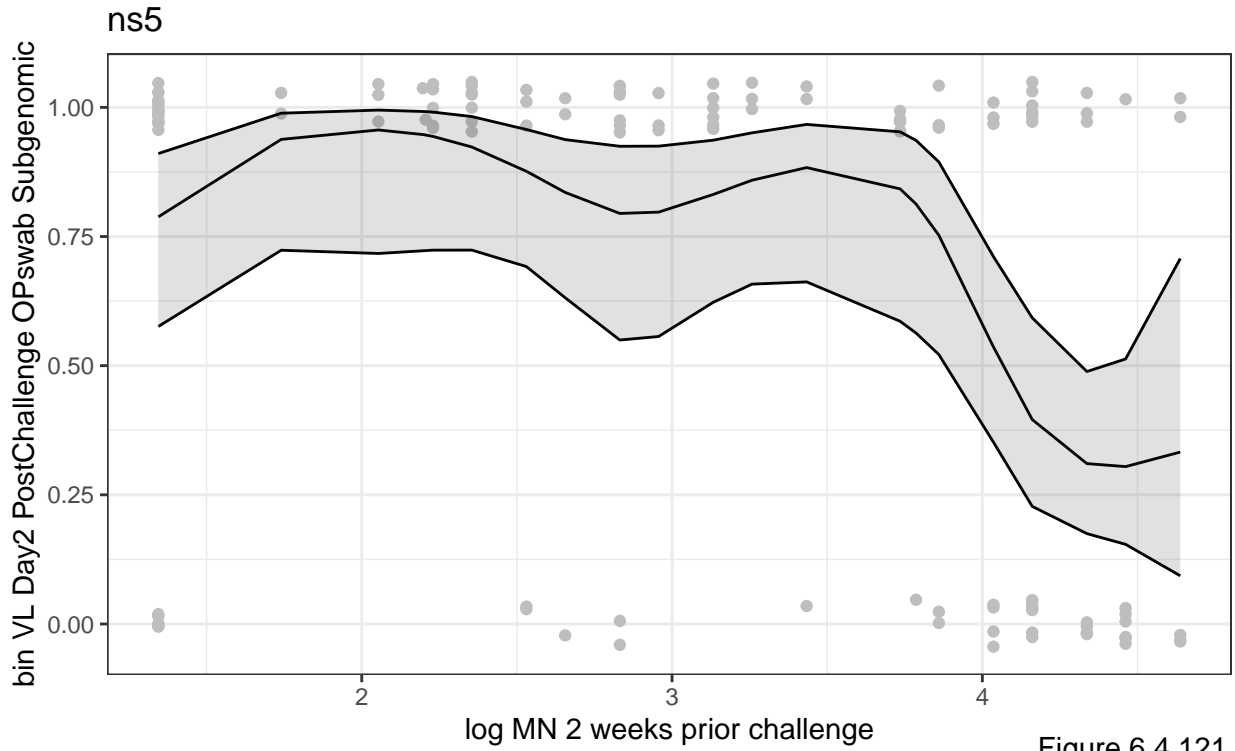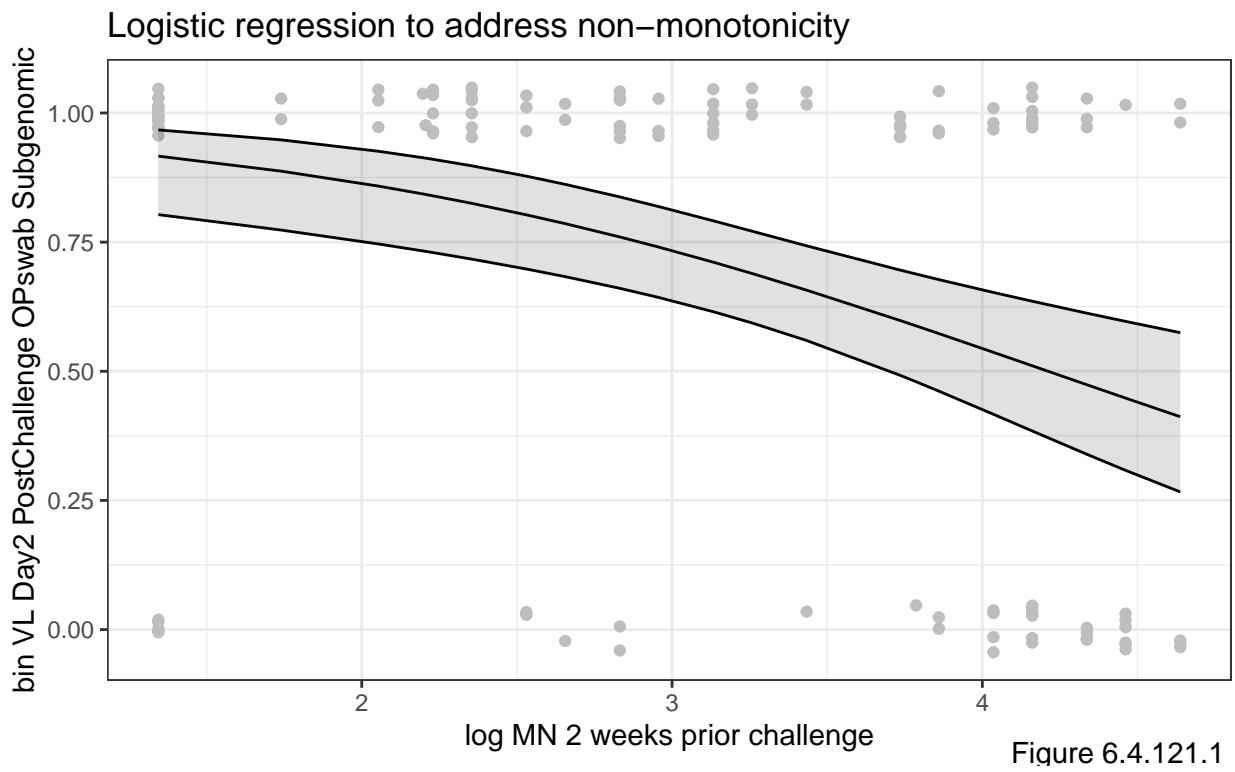

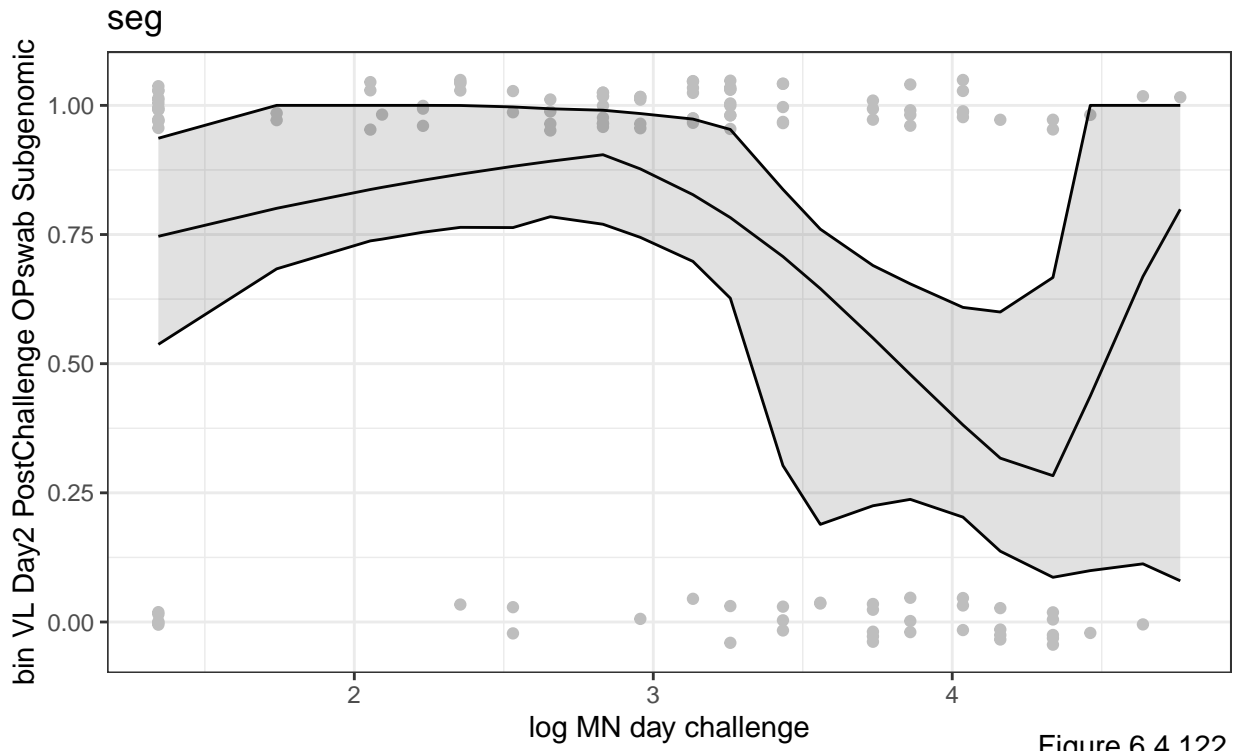

Figure 6.4.122

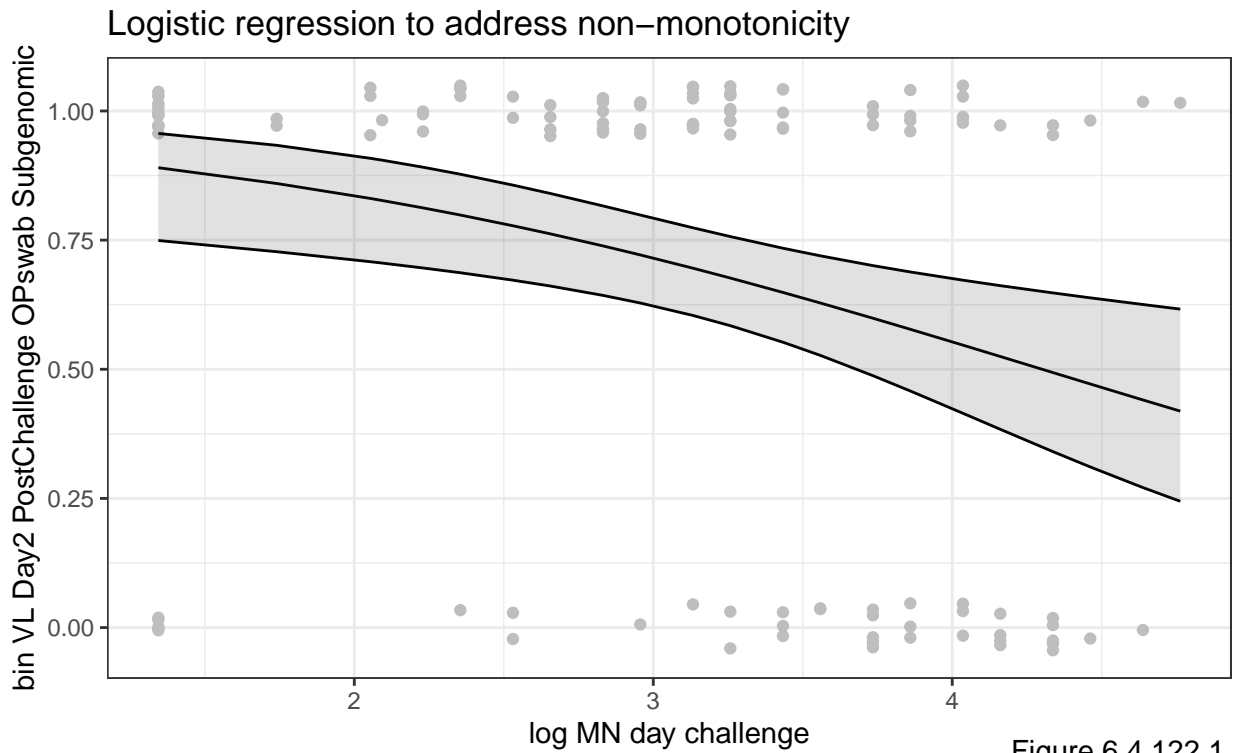

Figure 6.4.122.1

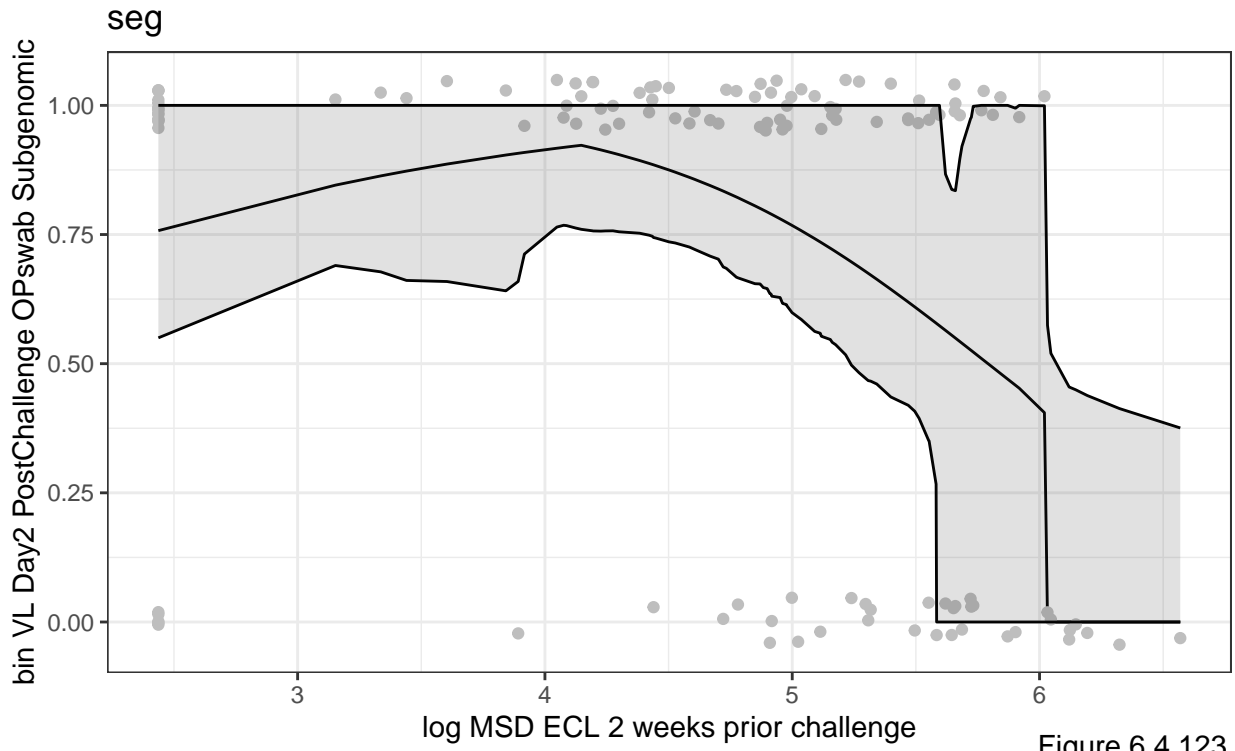

Figure 6.4.123

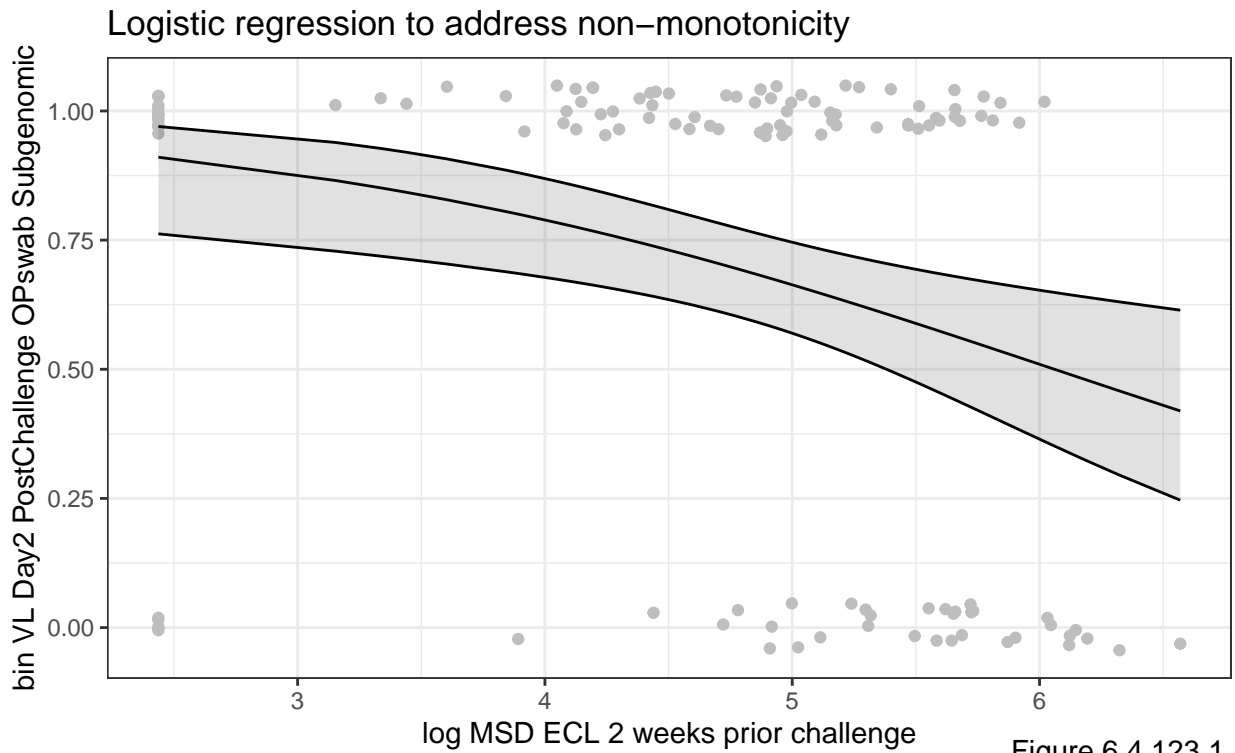

Figure 6.4.123.1

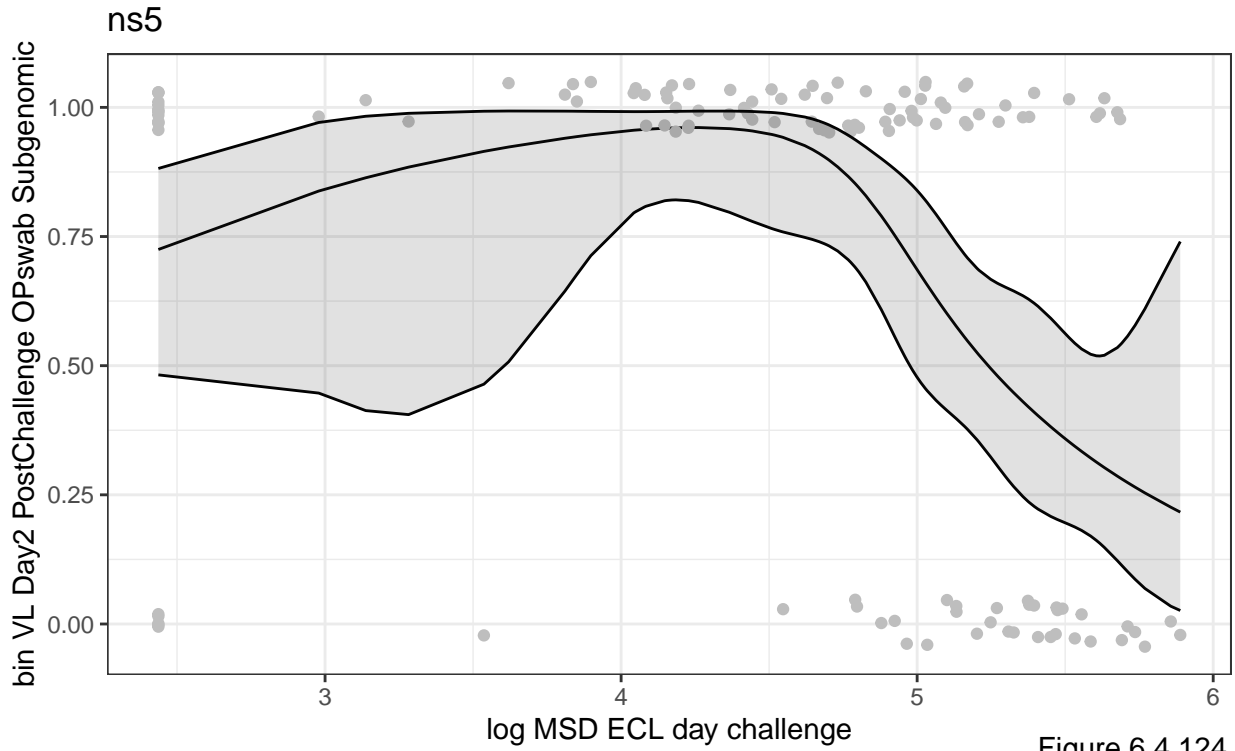

Figure 6.4.124

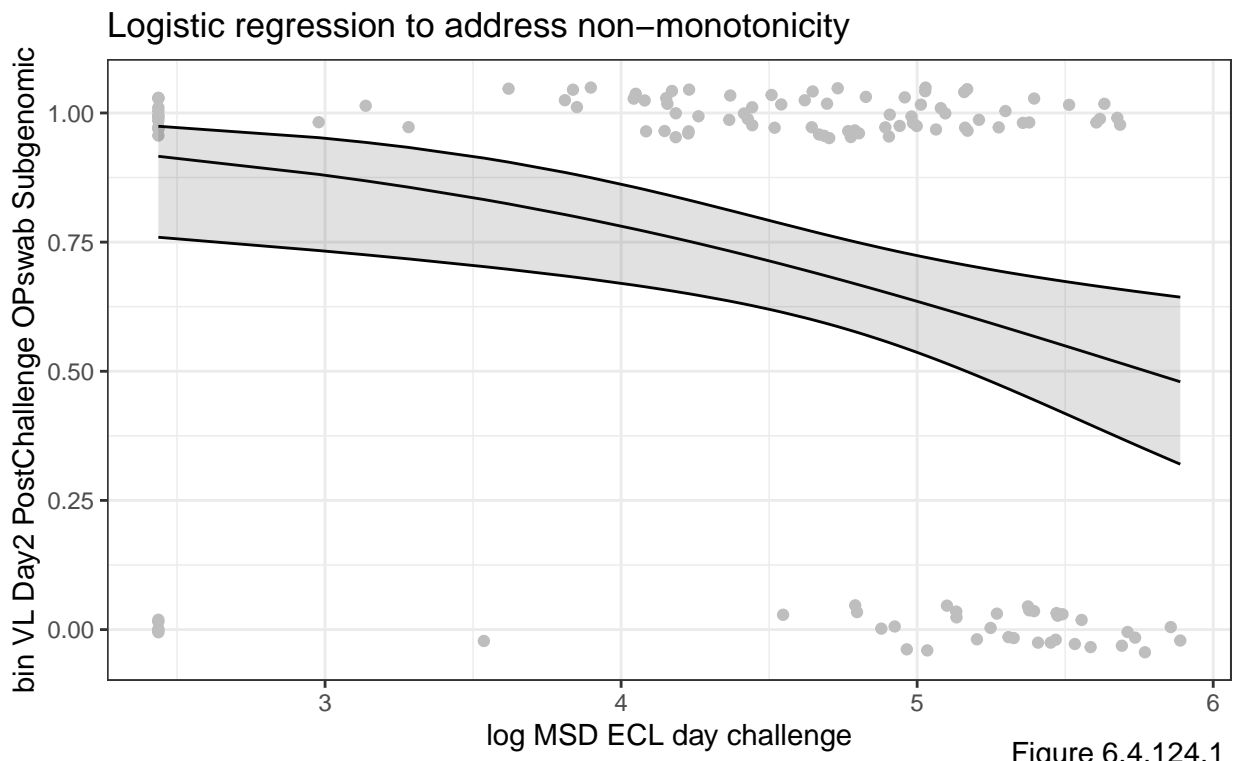

Figure 6.4.124.1

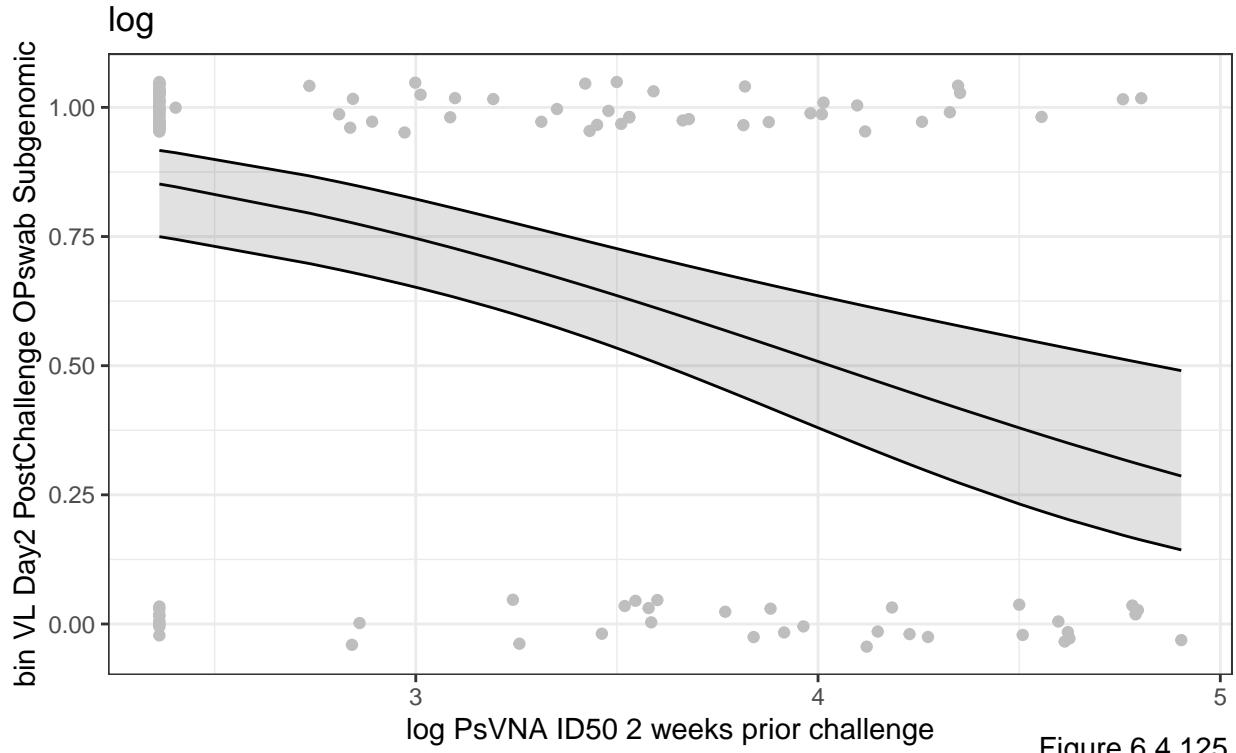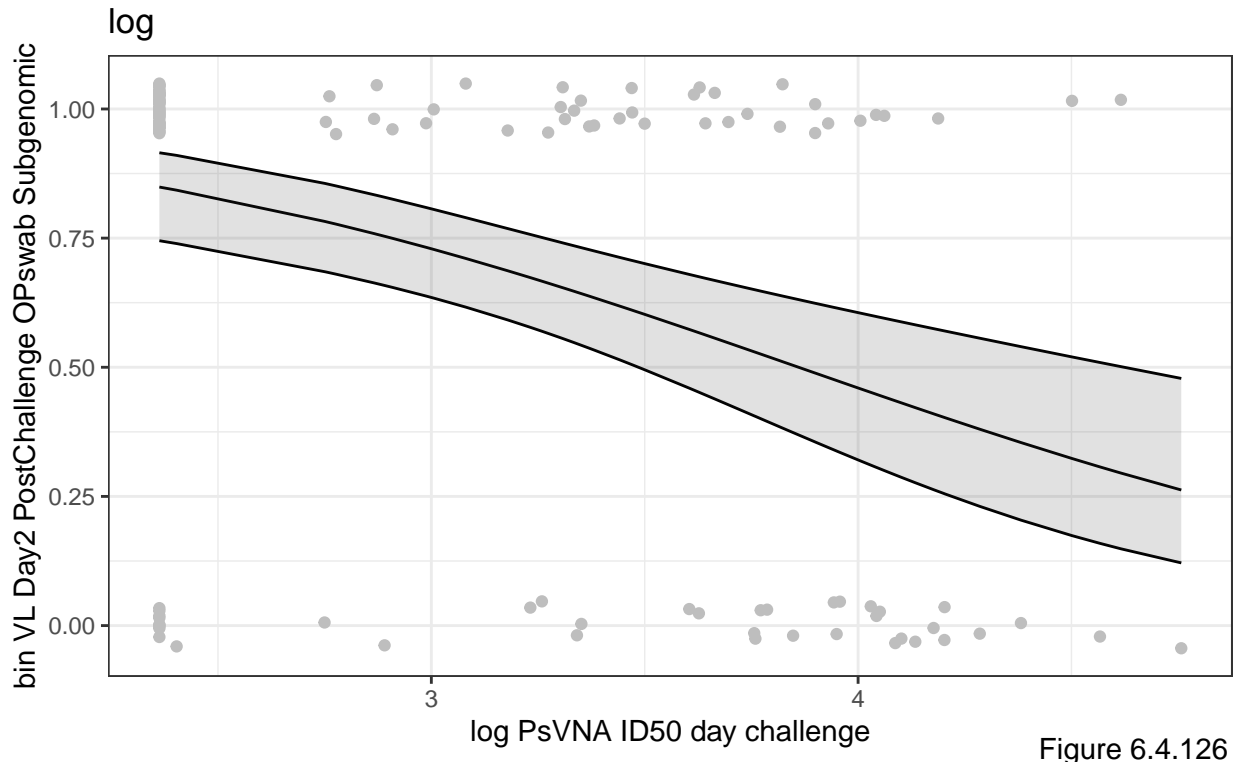

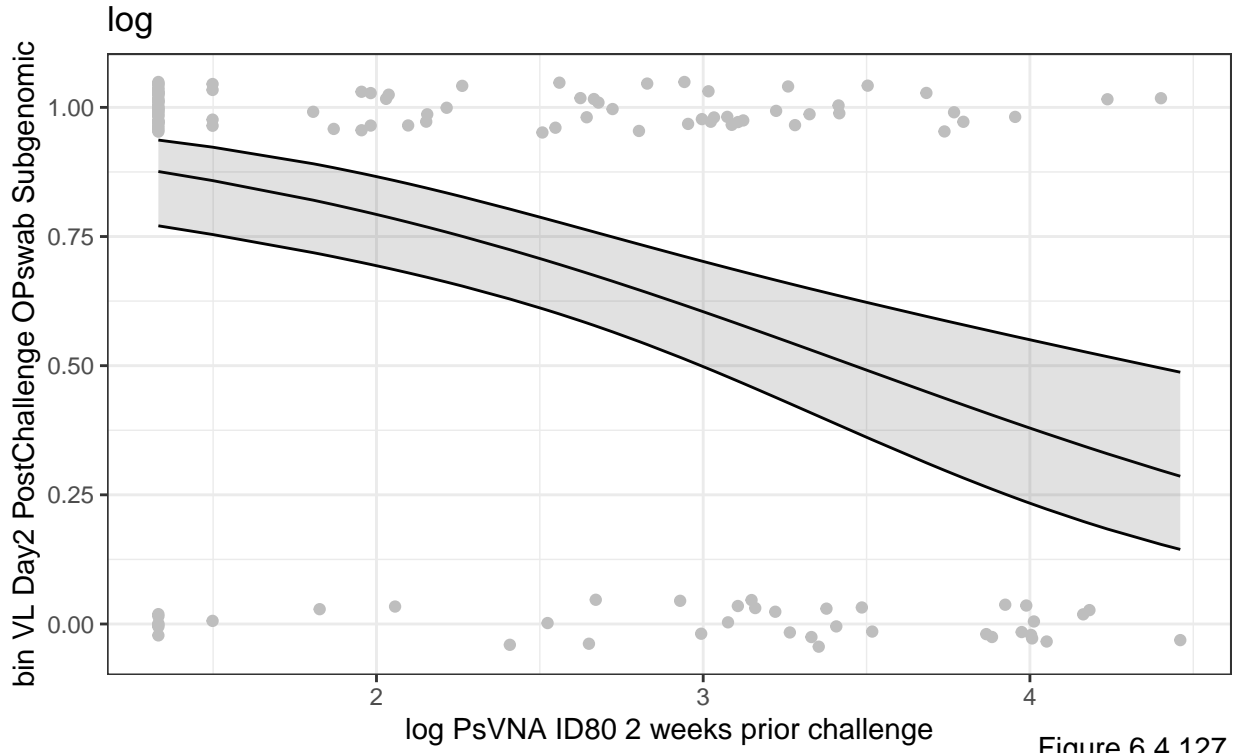

Figure 6.4.127

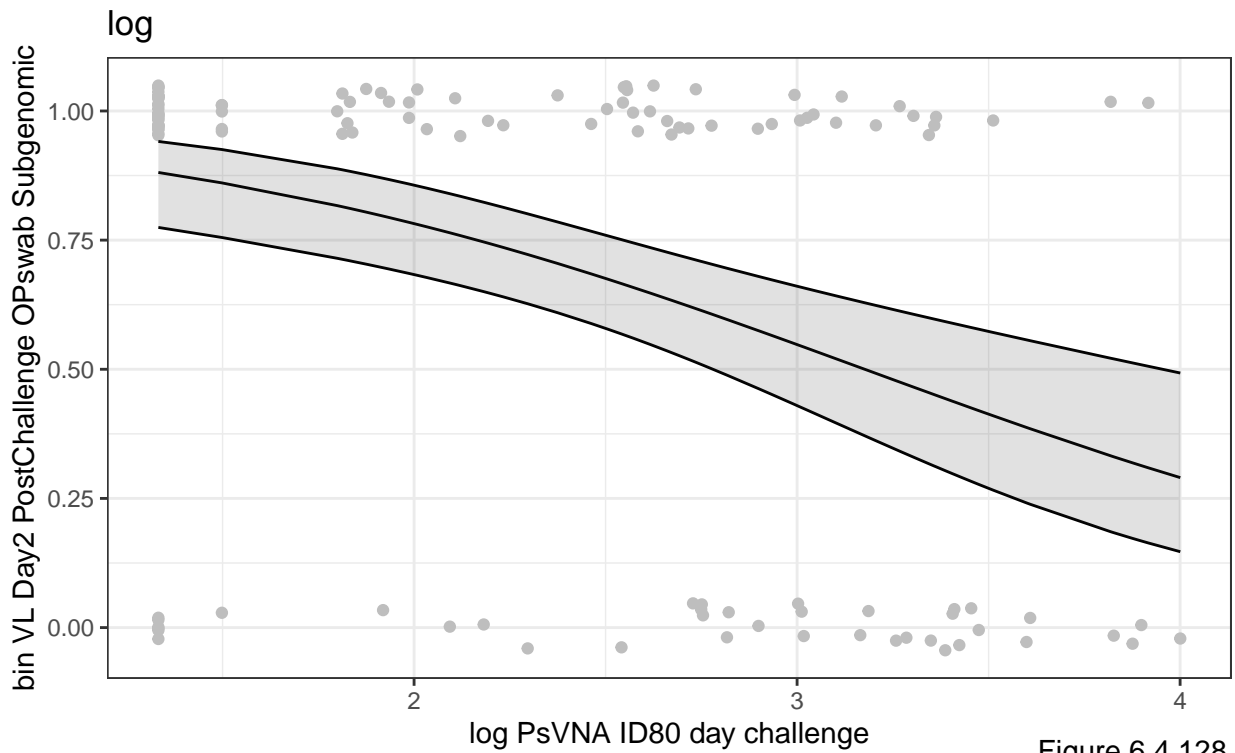

Figure 6.4.128

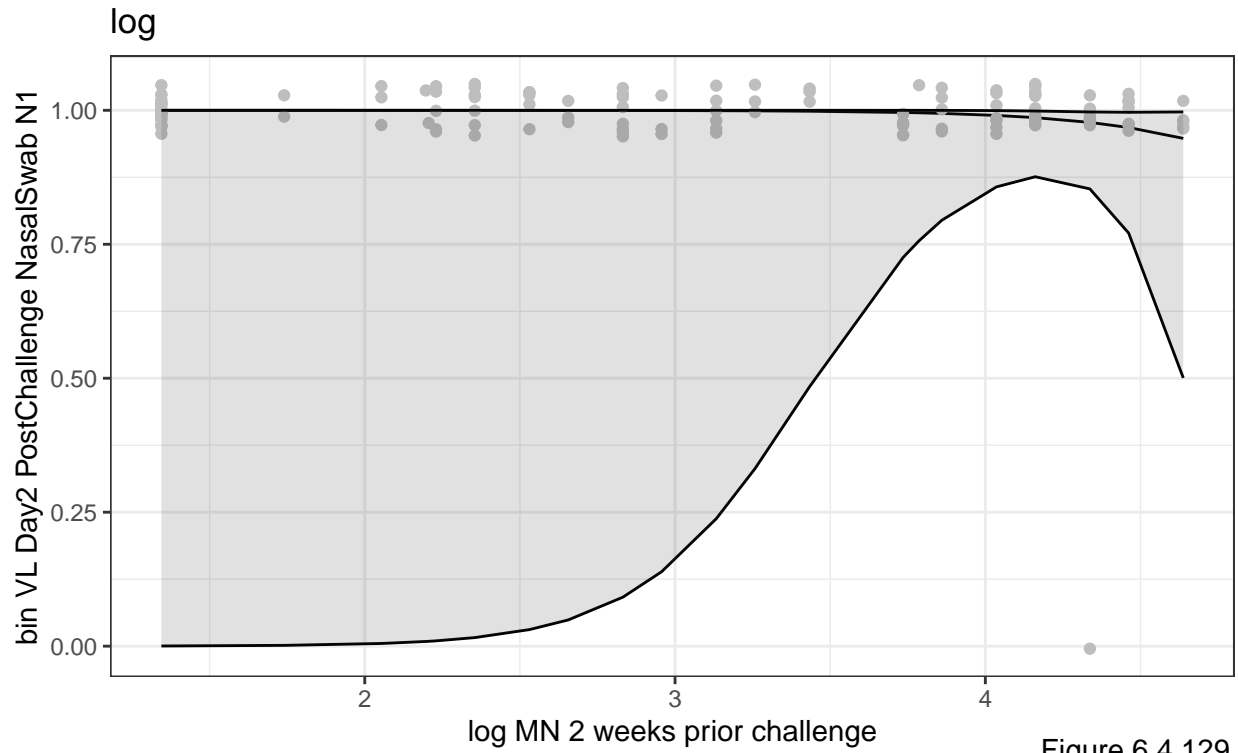

Figure 6.4.129

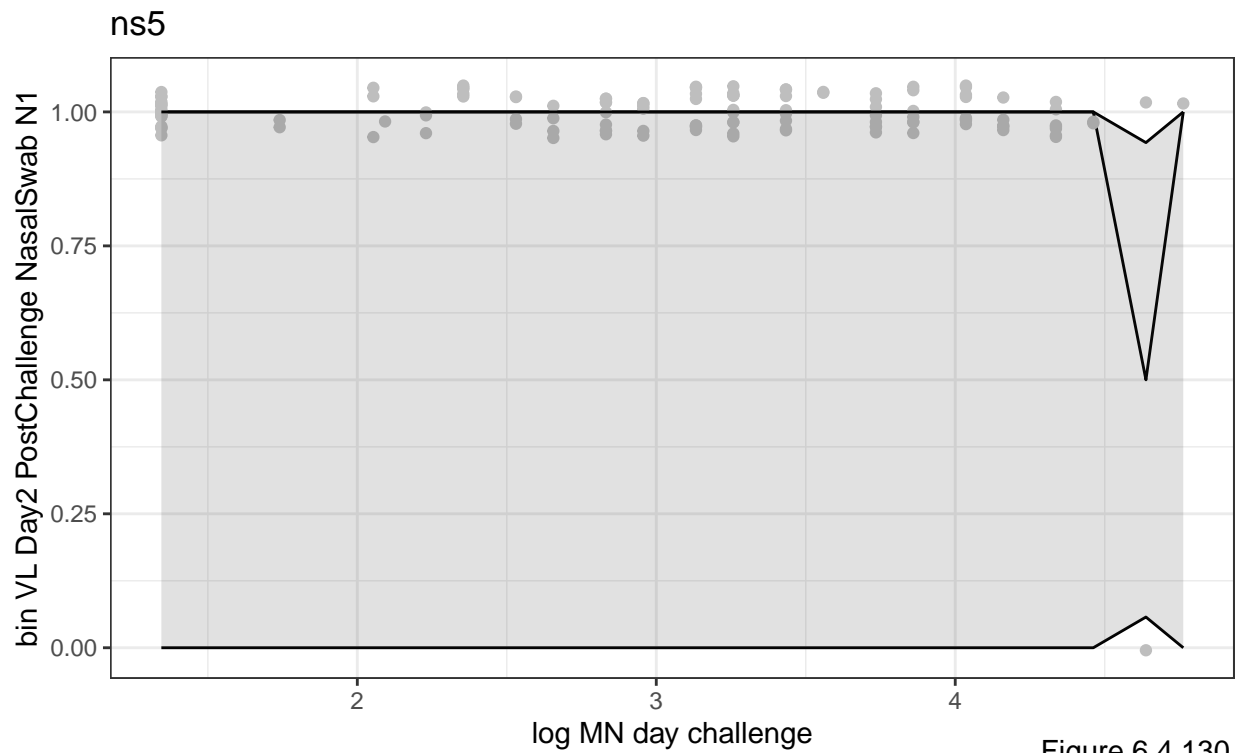

Figure 6.4.130

Logistic regression to address non-monotonicity

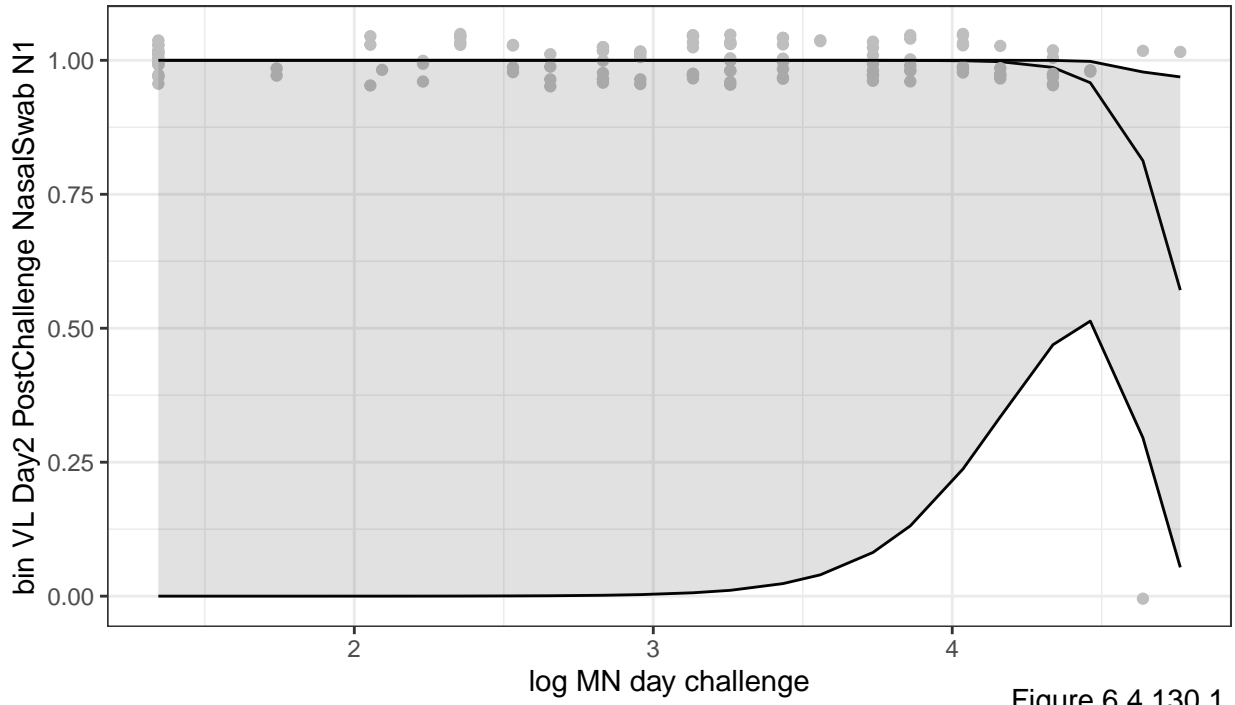

Figure 6.4.130.1

ns5

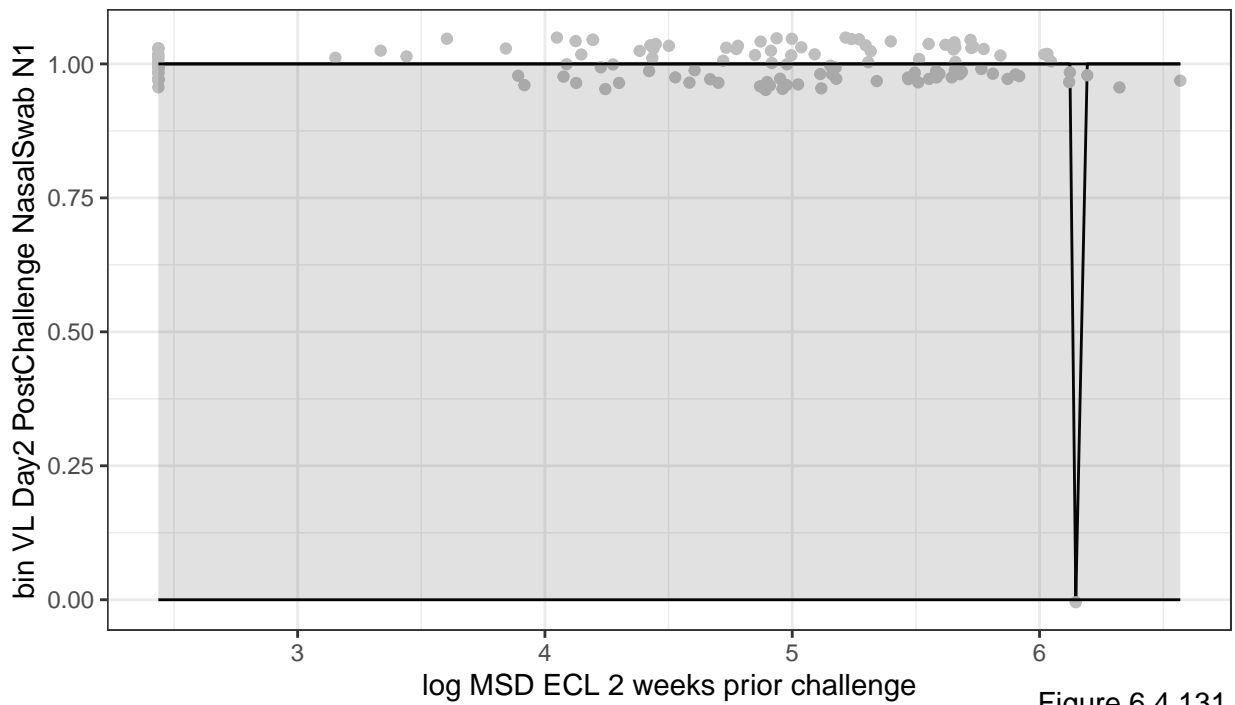

Figure 6.4.131

Logistic regression to address non-monotonicity

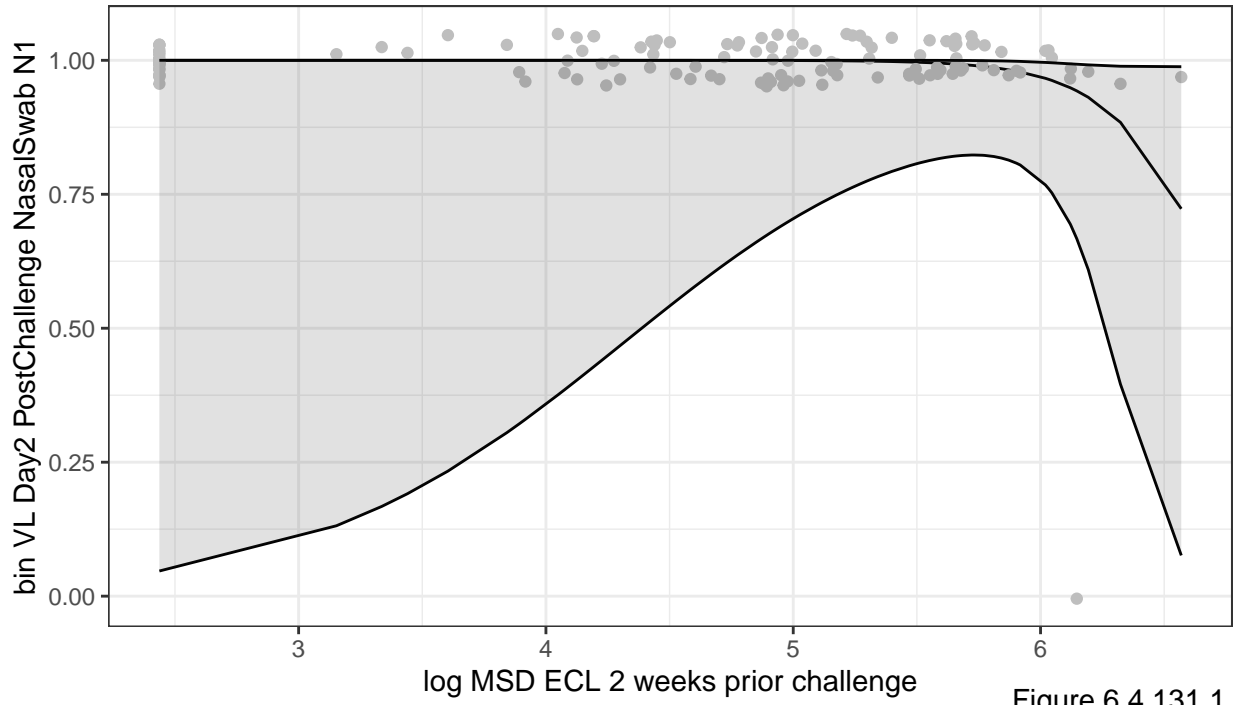

Figure 6.4.131.1

ns5

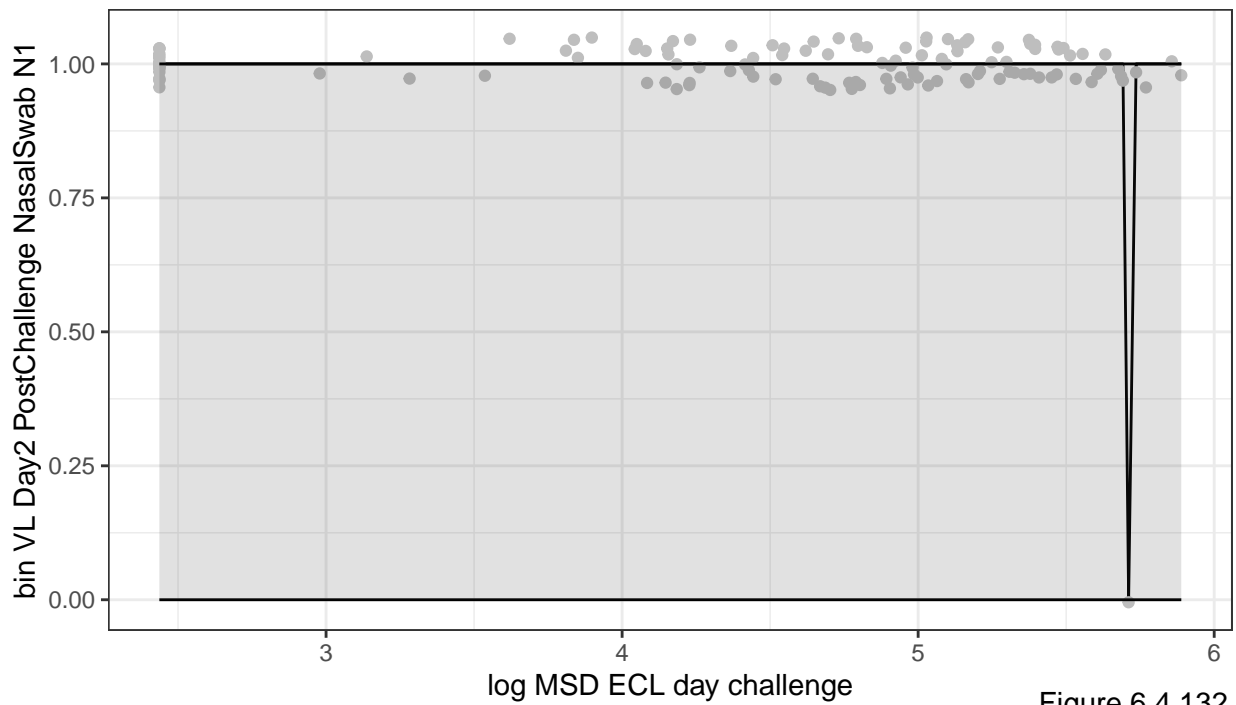

Figure 6.4.132

Logistic regression to address non-monotonicity

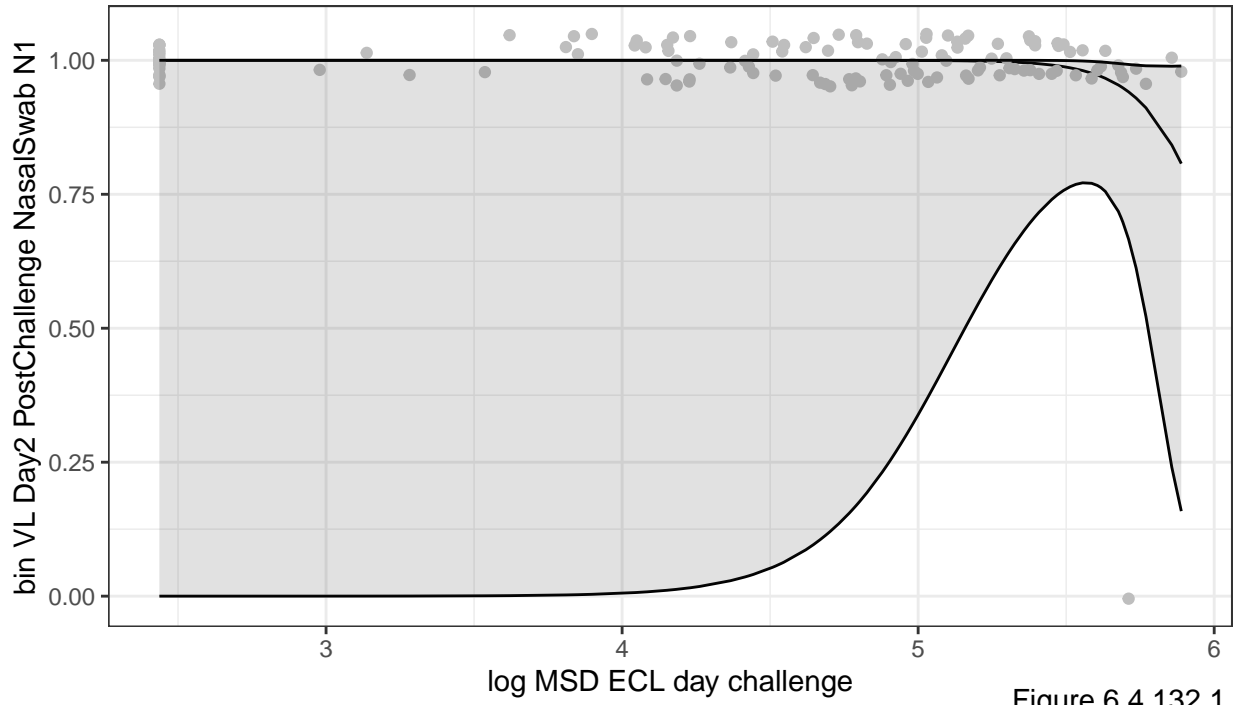

Figure 6.4.132.1

ns5

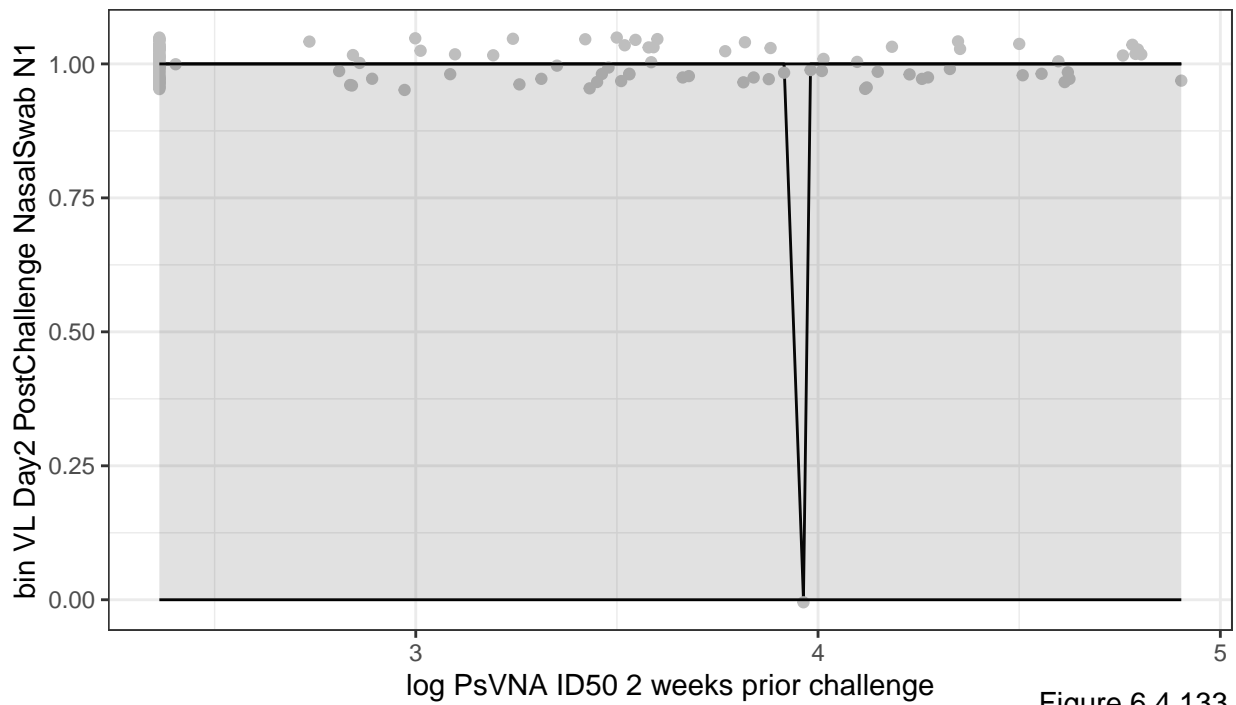

Figure 6.4.133

Logistic regression to address non-monotonicity

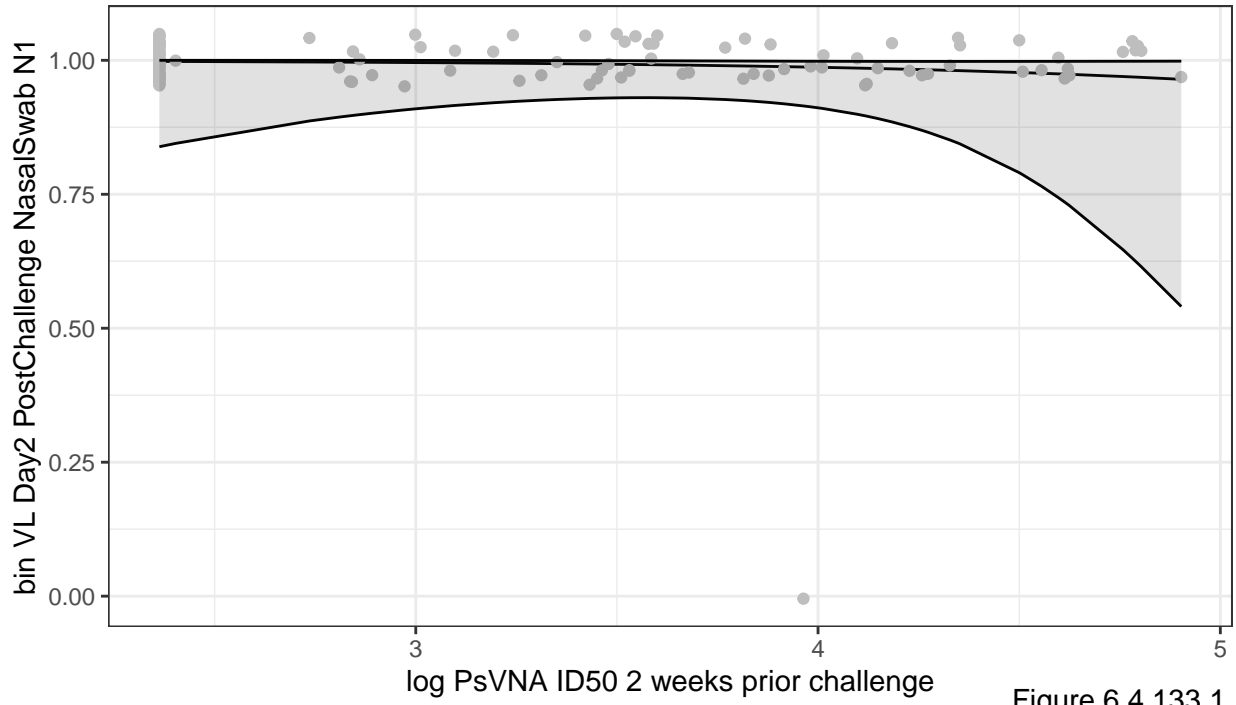

Figure 6.4.133.1

ns5

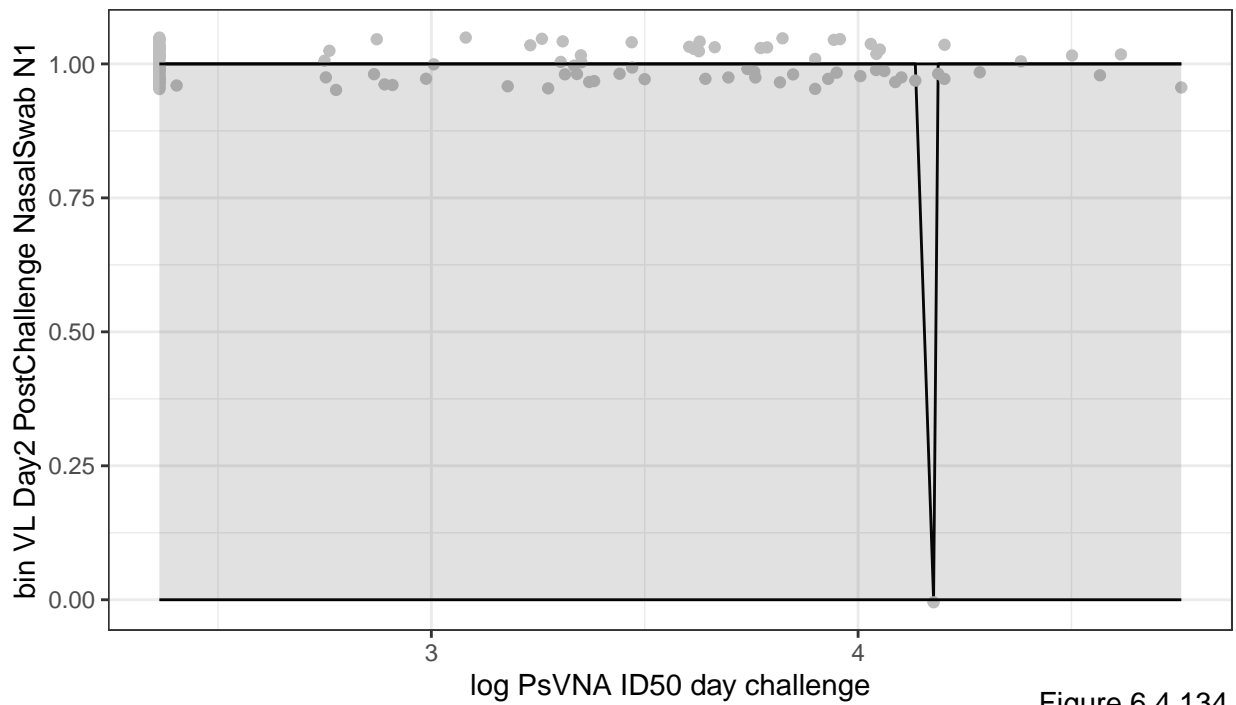

Figure 6.4.134

Logistic regression to address non-monotonicity

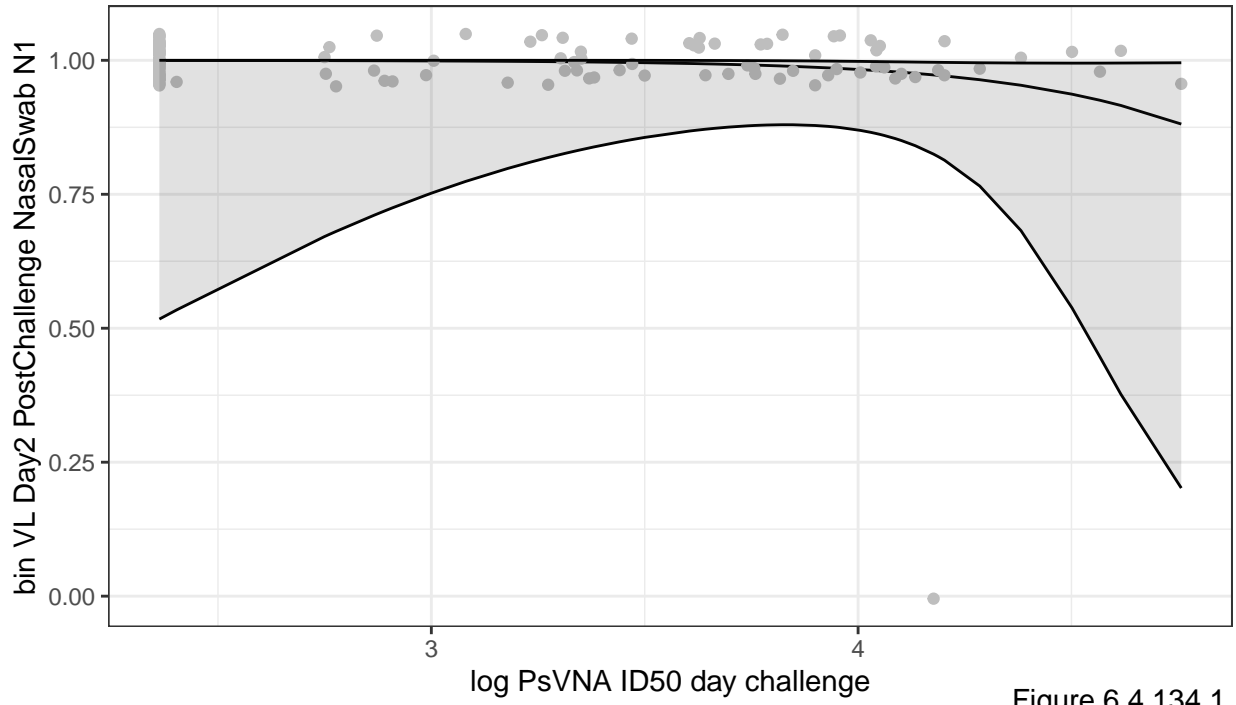

Figure 6.4.134.1

ns5

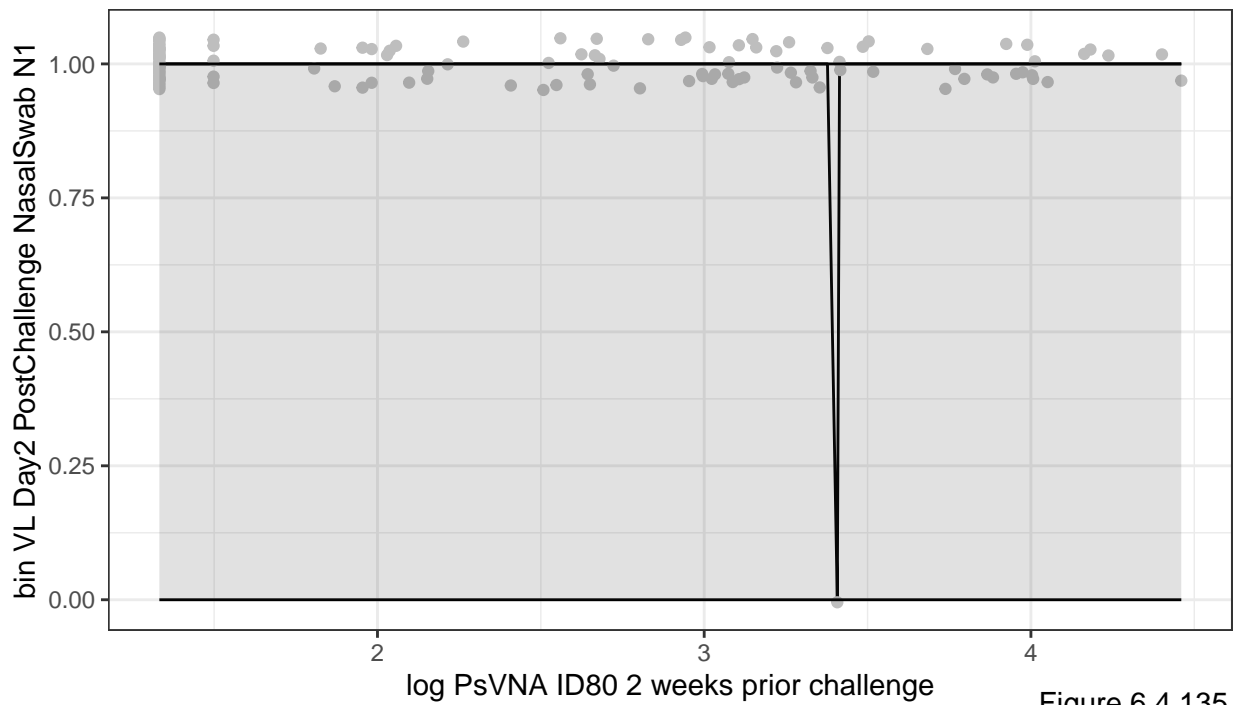

Figure 6.4.135

Logistic regression to address non-monotonicity

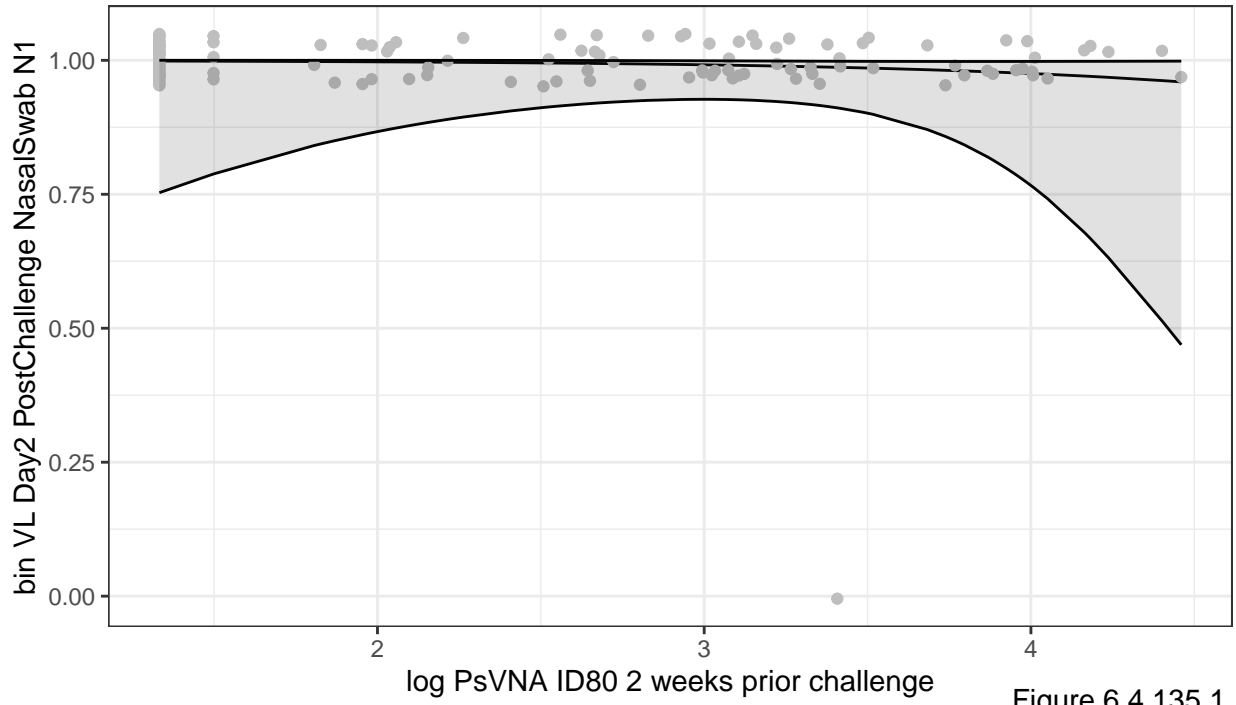

Figure 6.4.135.1

ns5

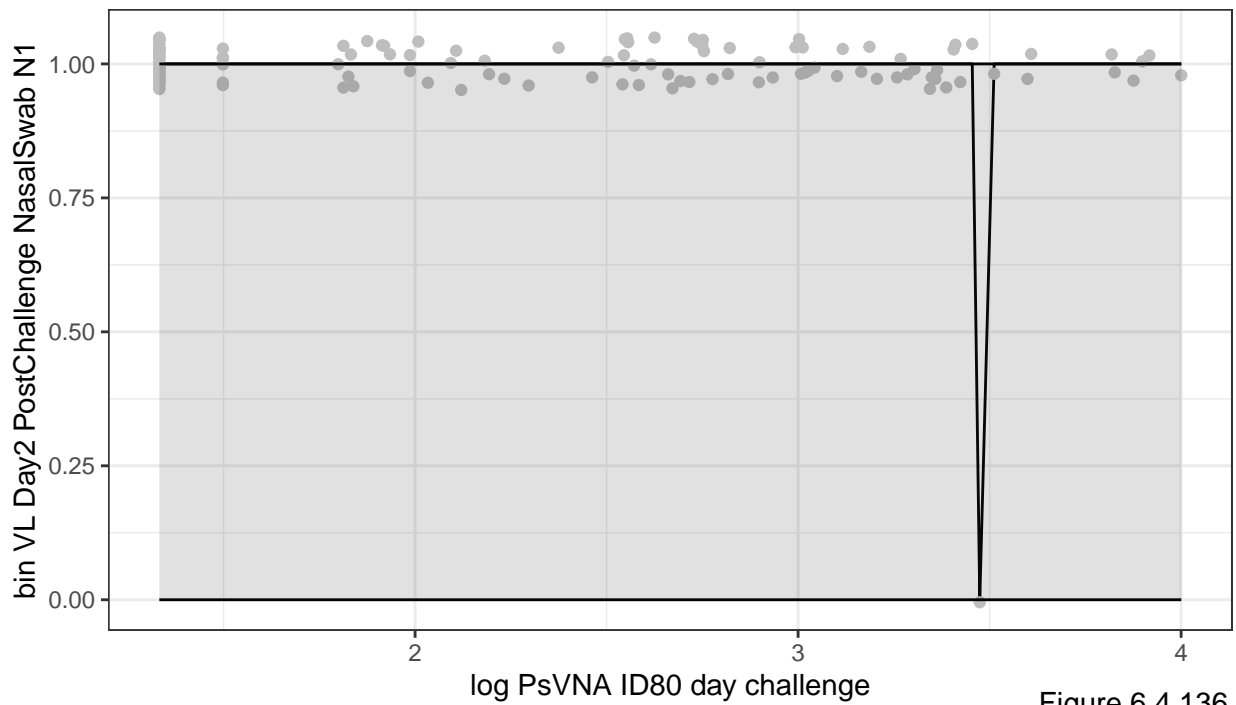

Figure 6.4.136

Logistic regression to address non-monotonicity

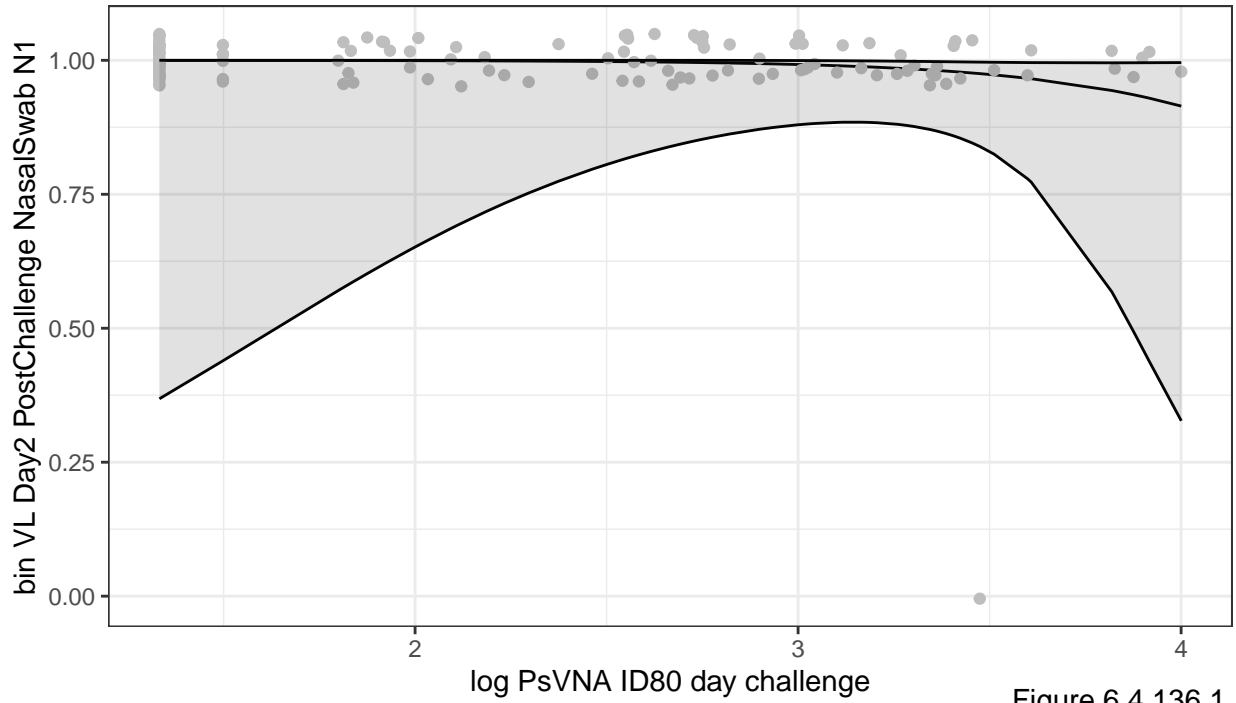

Figure 6.4.136.1

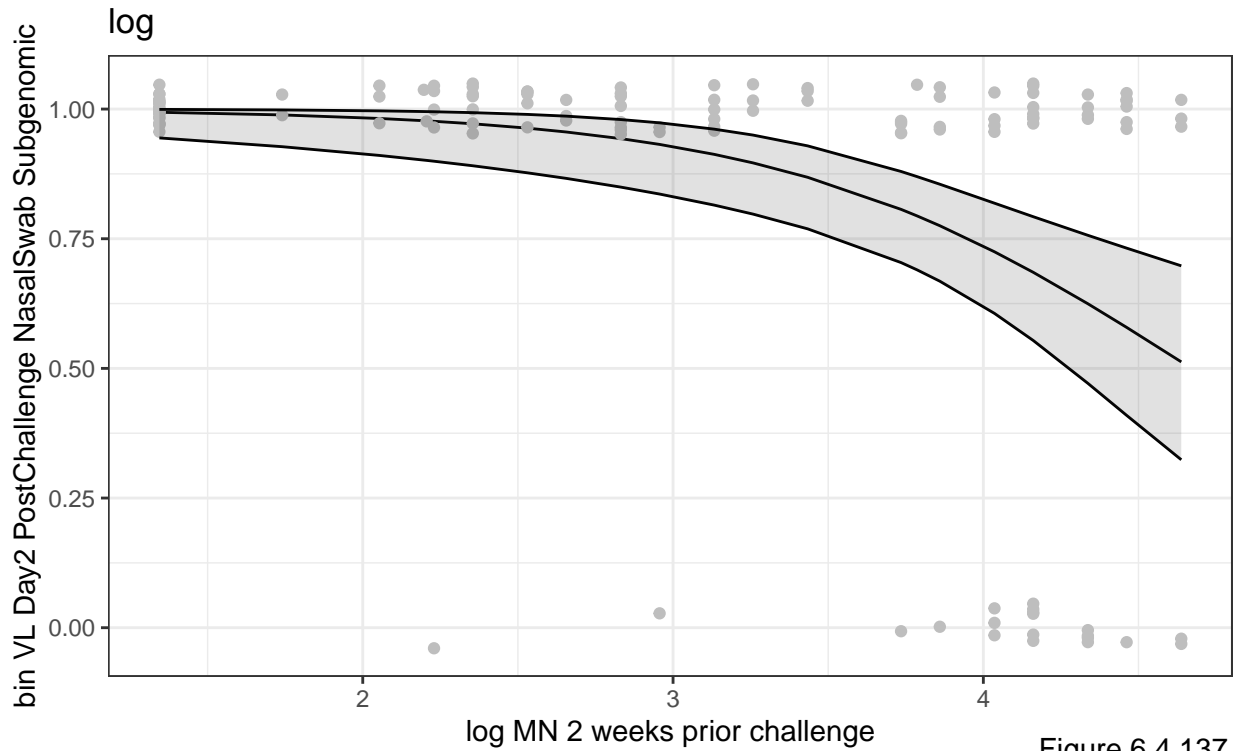

Figure 6.4.137

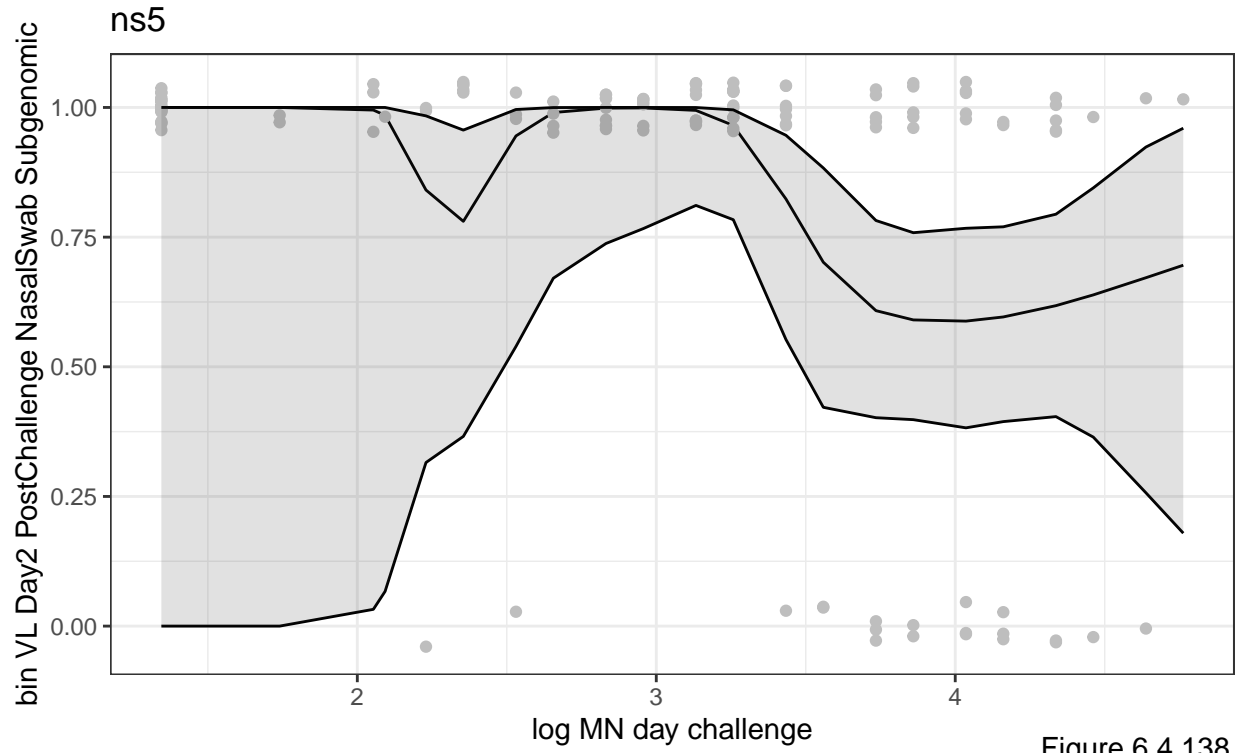

Figure 6.4.138

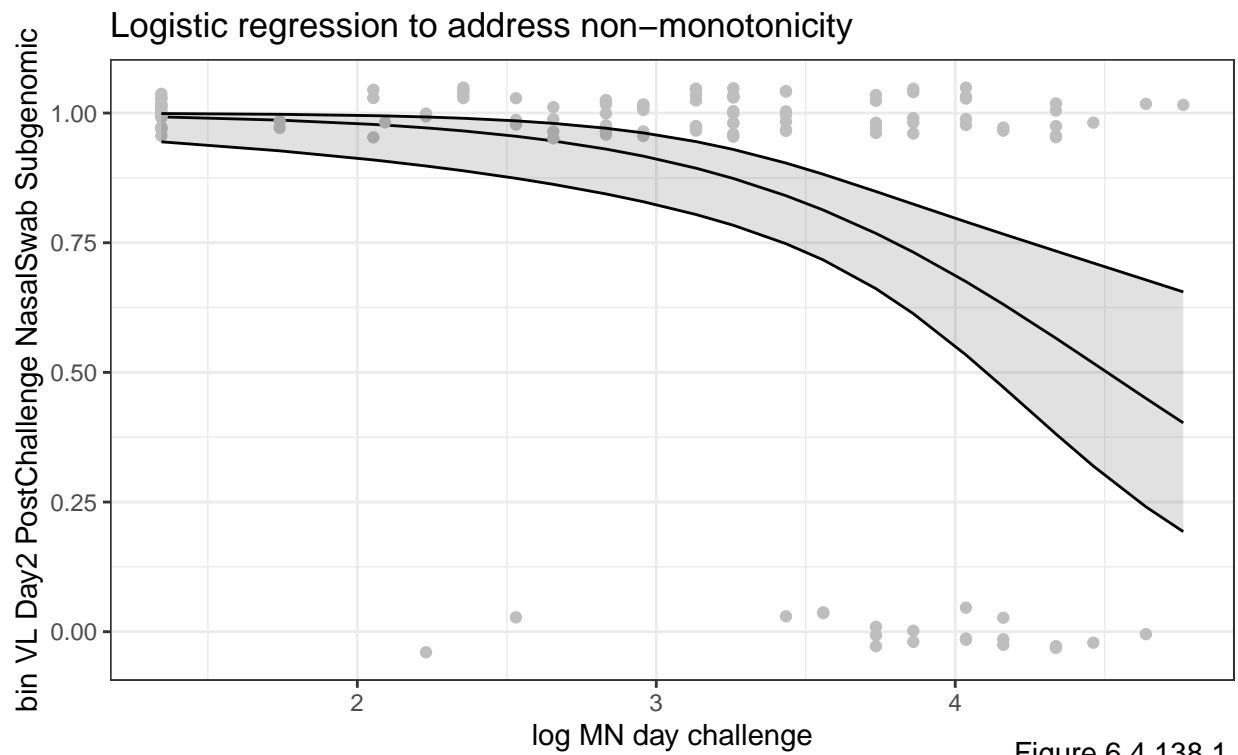

Figure 6.4.138.1

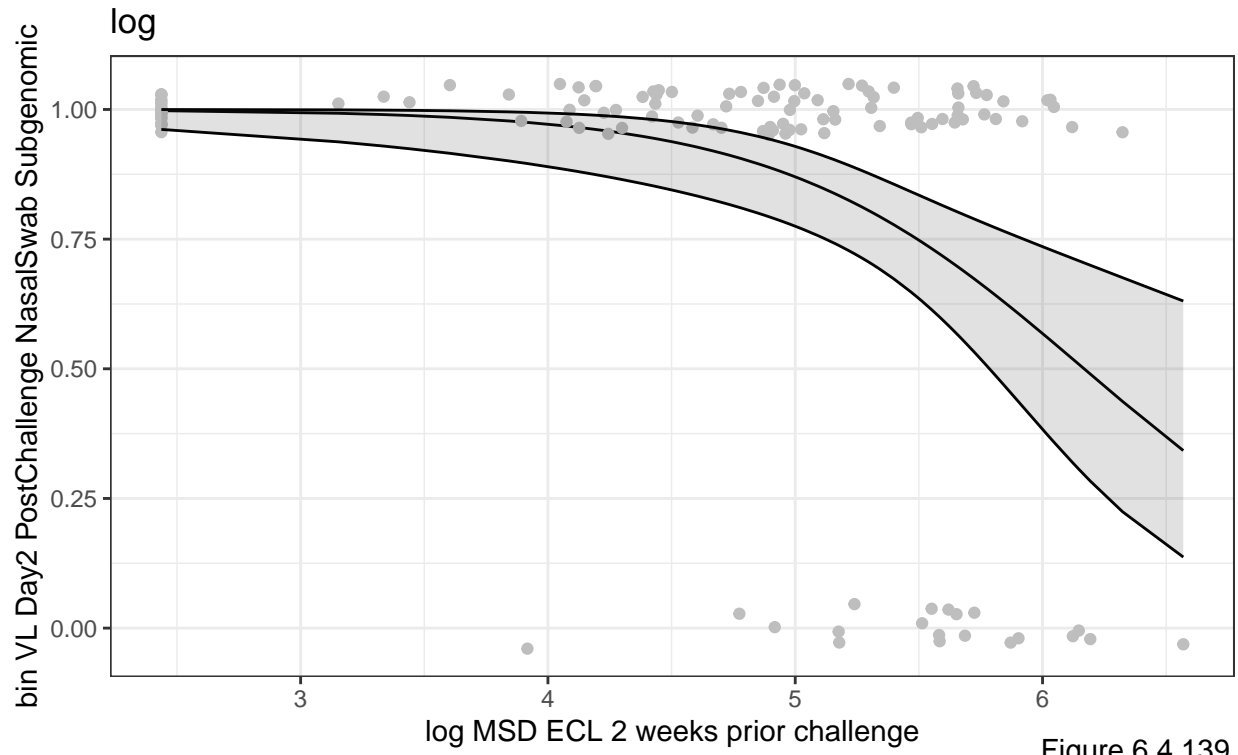

Figure 6.4.139

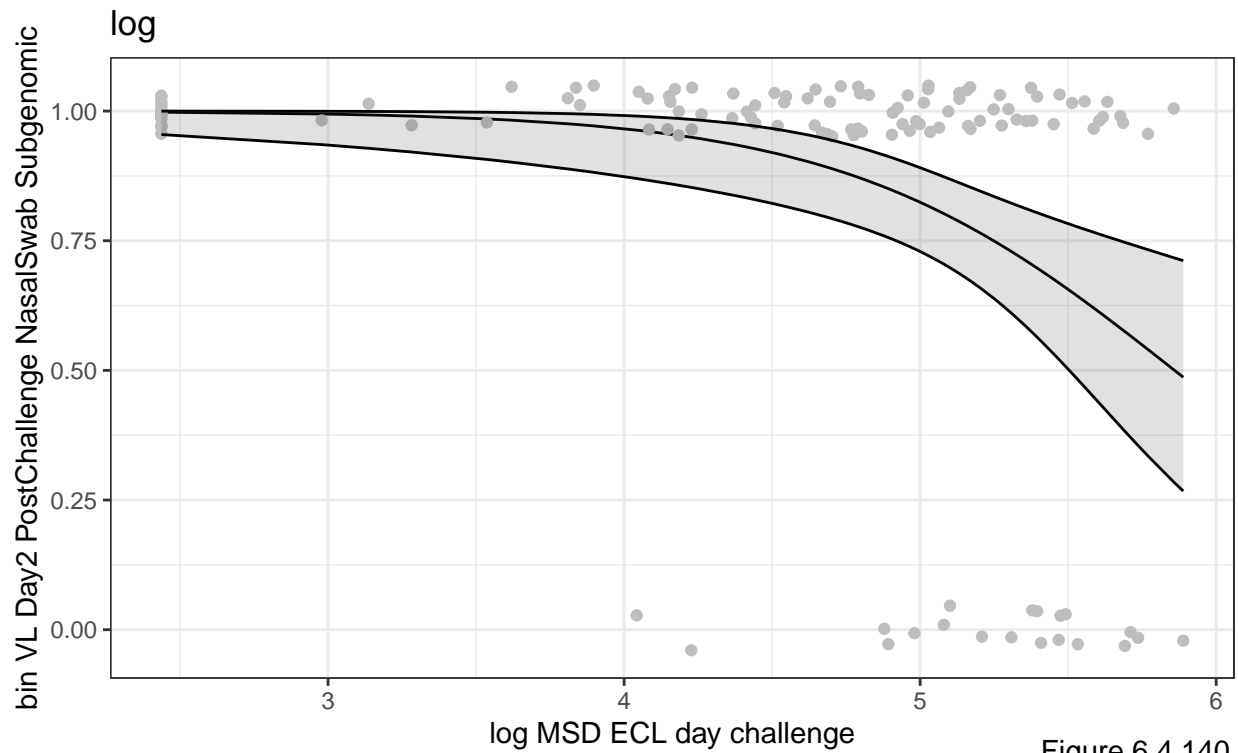

Figure 6.4.140

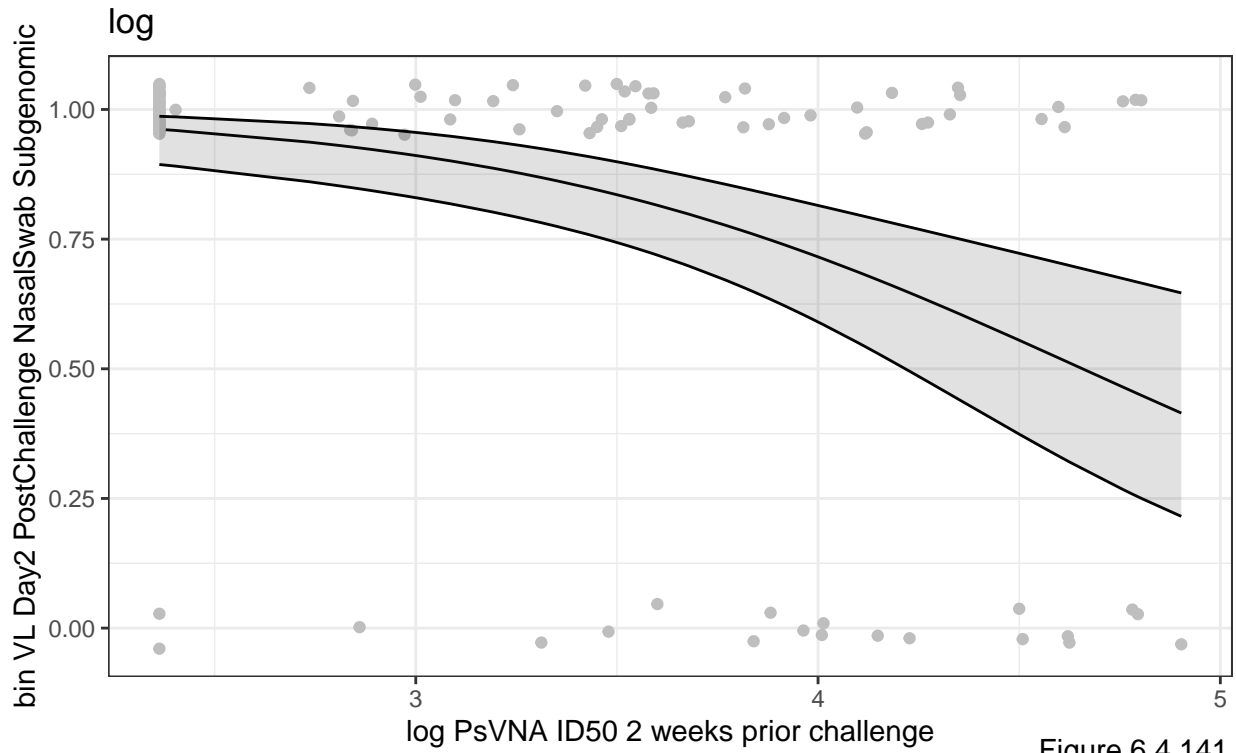

Figure 6.4.141

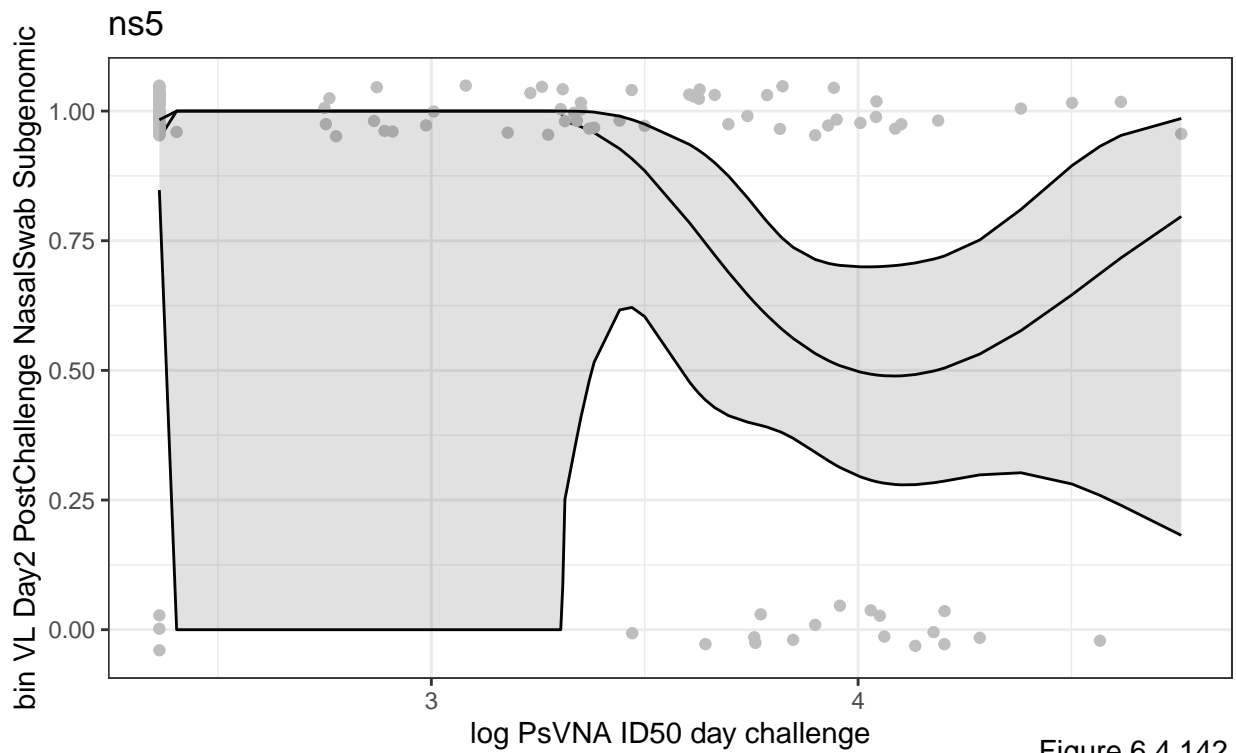

Figure 6.4.142

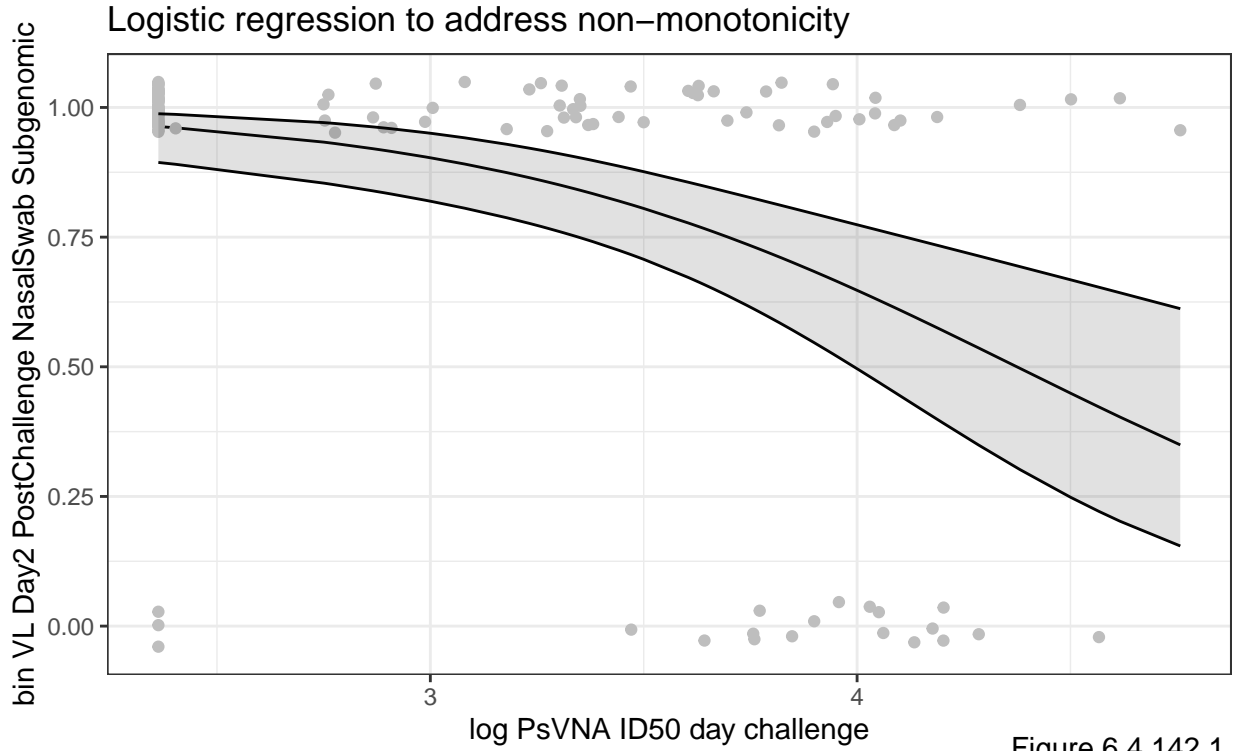

Figure 6.4.142.1

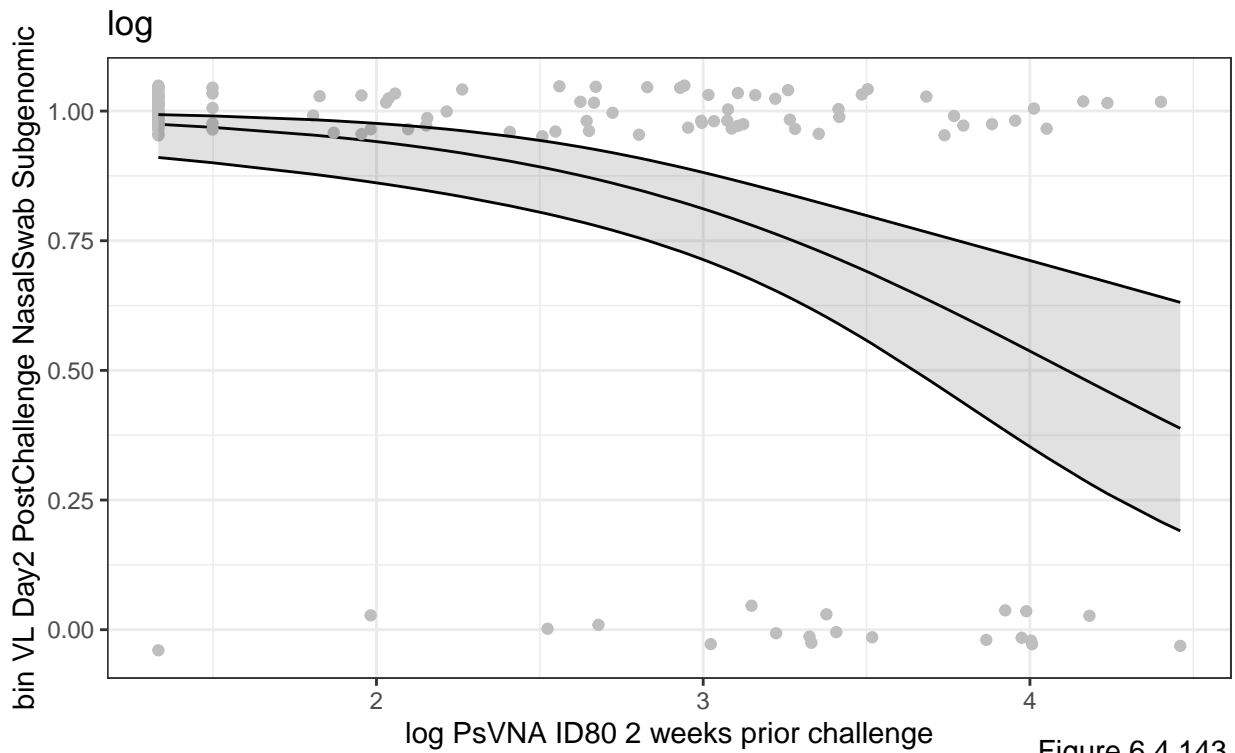

Figure 6.4.143

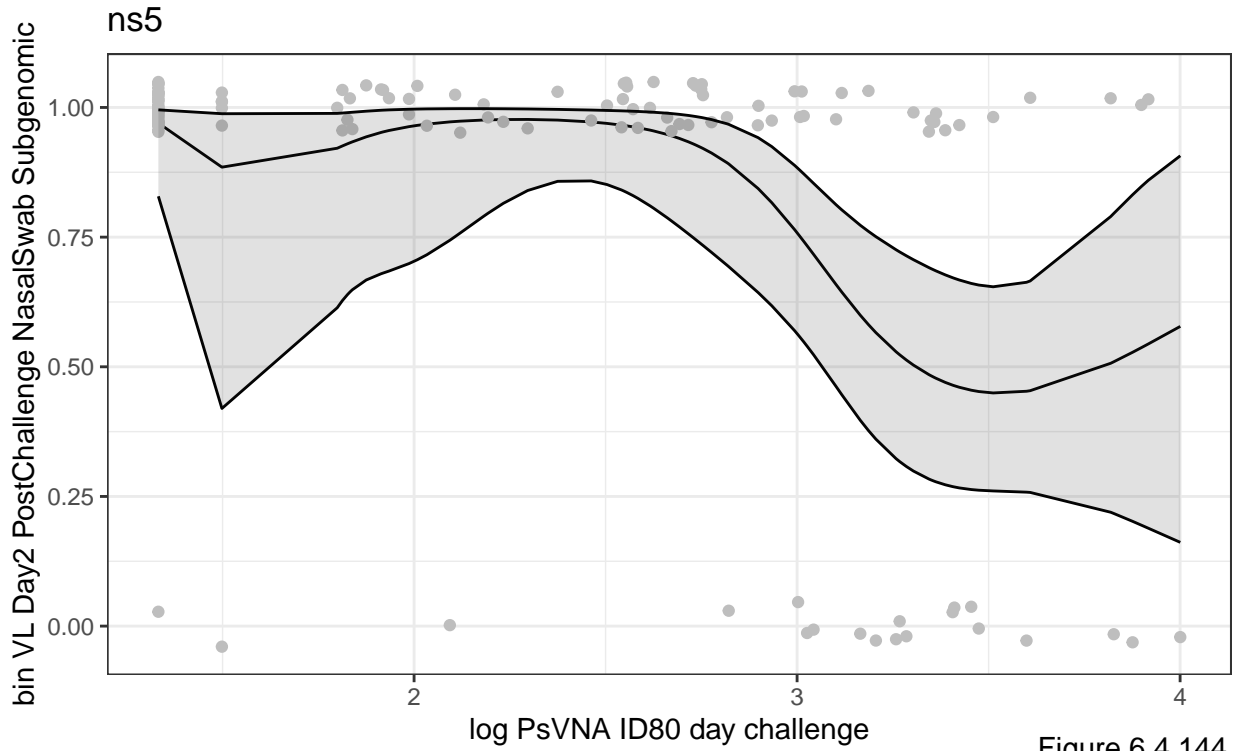

Figure 6.4.144

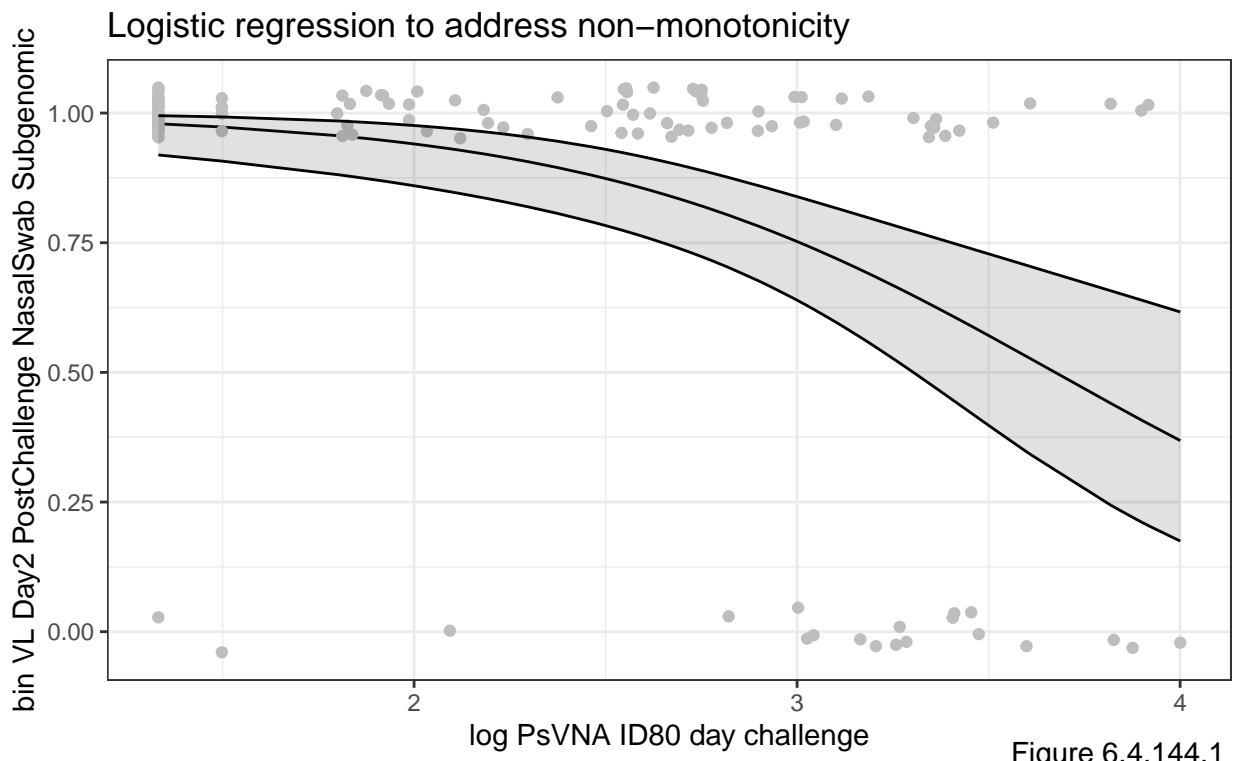

Figure 6.4.144.1
