# Supplementary material for: Humoral Immune Correlates Analysis of Four Vaccines Against SARS-CoV-2 in Rhesus Macaques
Source: Research Square preprint supplement (doi:10.21203/rs.3.rs-9404931/v1), 2026-04-30
Supplement: Supplementary file 8 [file 98f1693c06e64850c6a79890.pdf]

## CoP SAP 6.2

Allyson Mateja

May 17, 2024

### **6.2 Graphical Exploration of Virus-Specific Antibodies and Viral Load**

#### **Virus-Specific Antibodies**

##### **Plots**

Scatter plots of pairs of virus-specific antibodies will be generated to determine how well they correlate. All arms (different vaccine products, different dilutions, and controls) will be included on the same figure with different colors for dose groups and different panels for vaccine product.

Placebo

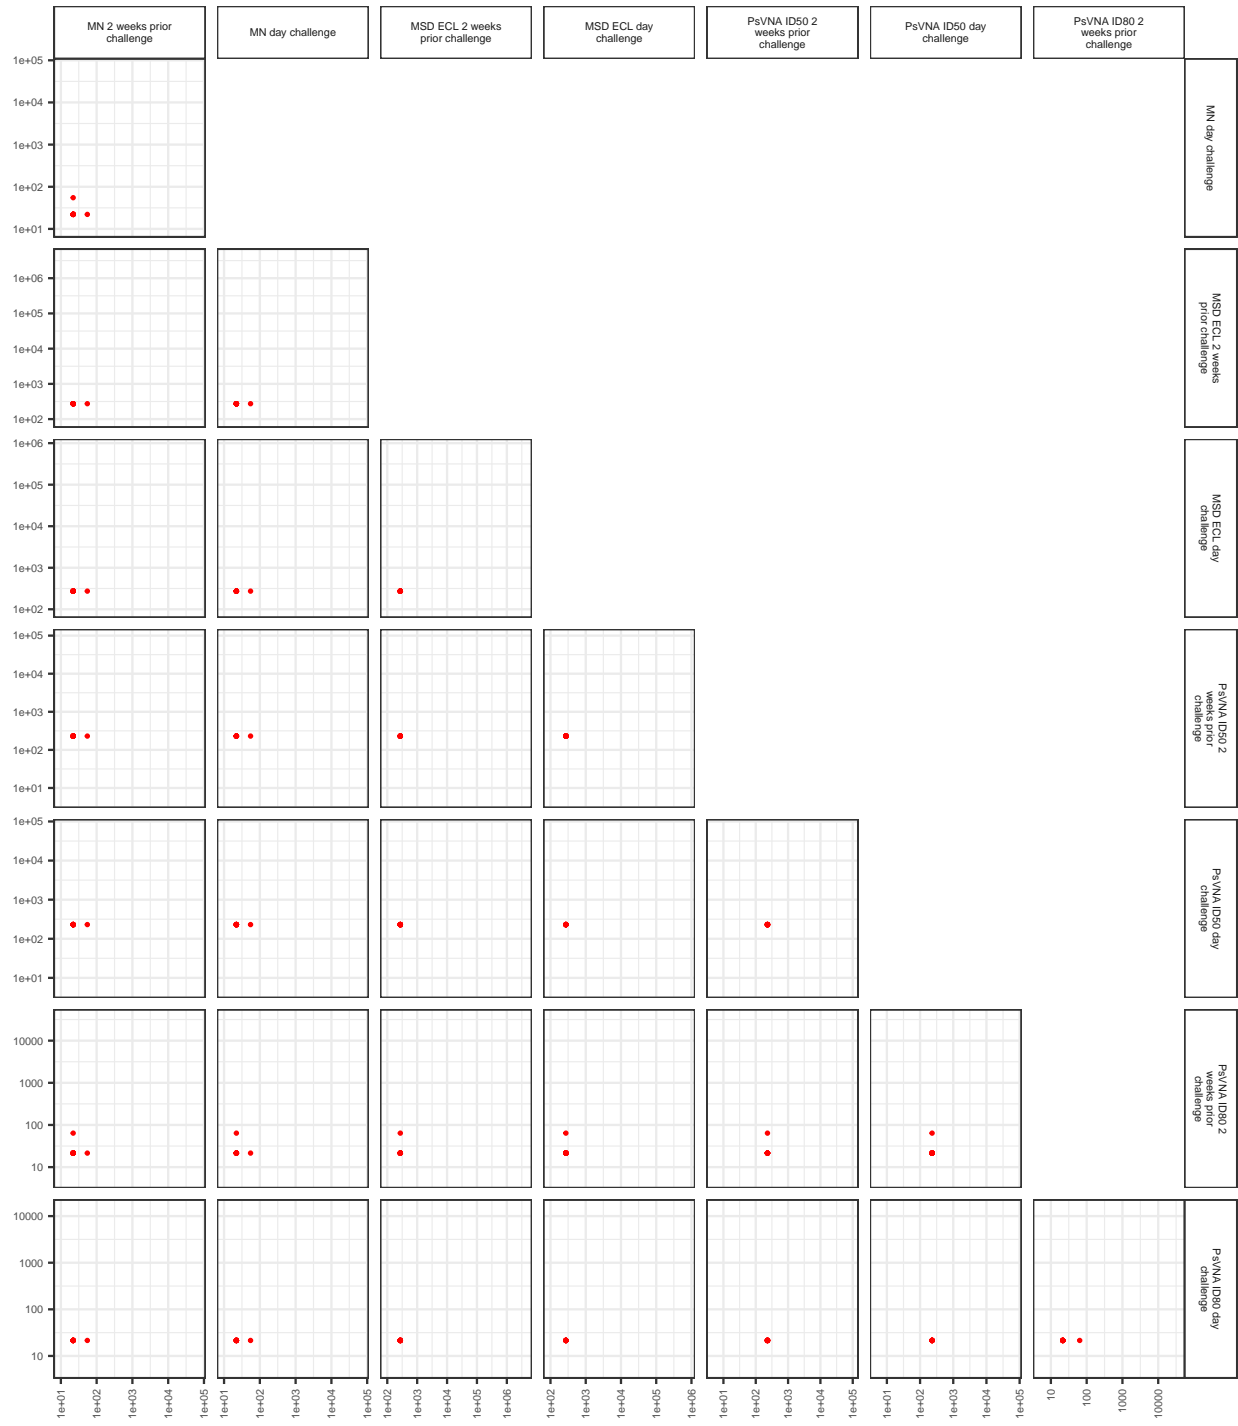

Dose Group • 5A

Figure 6.2.1

# Sanofi

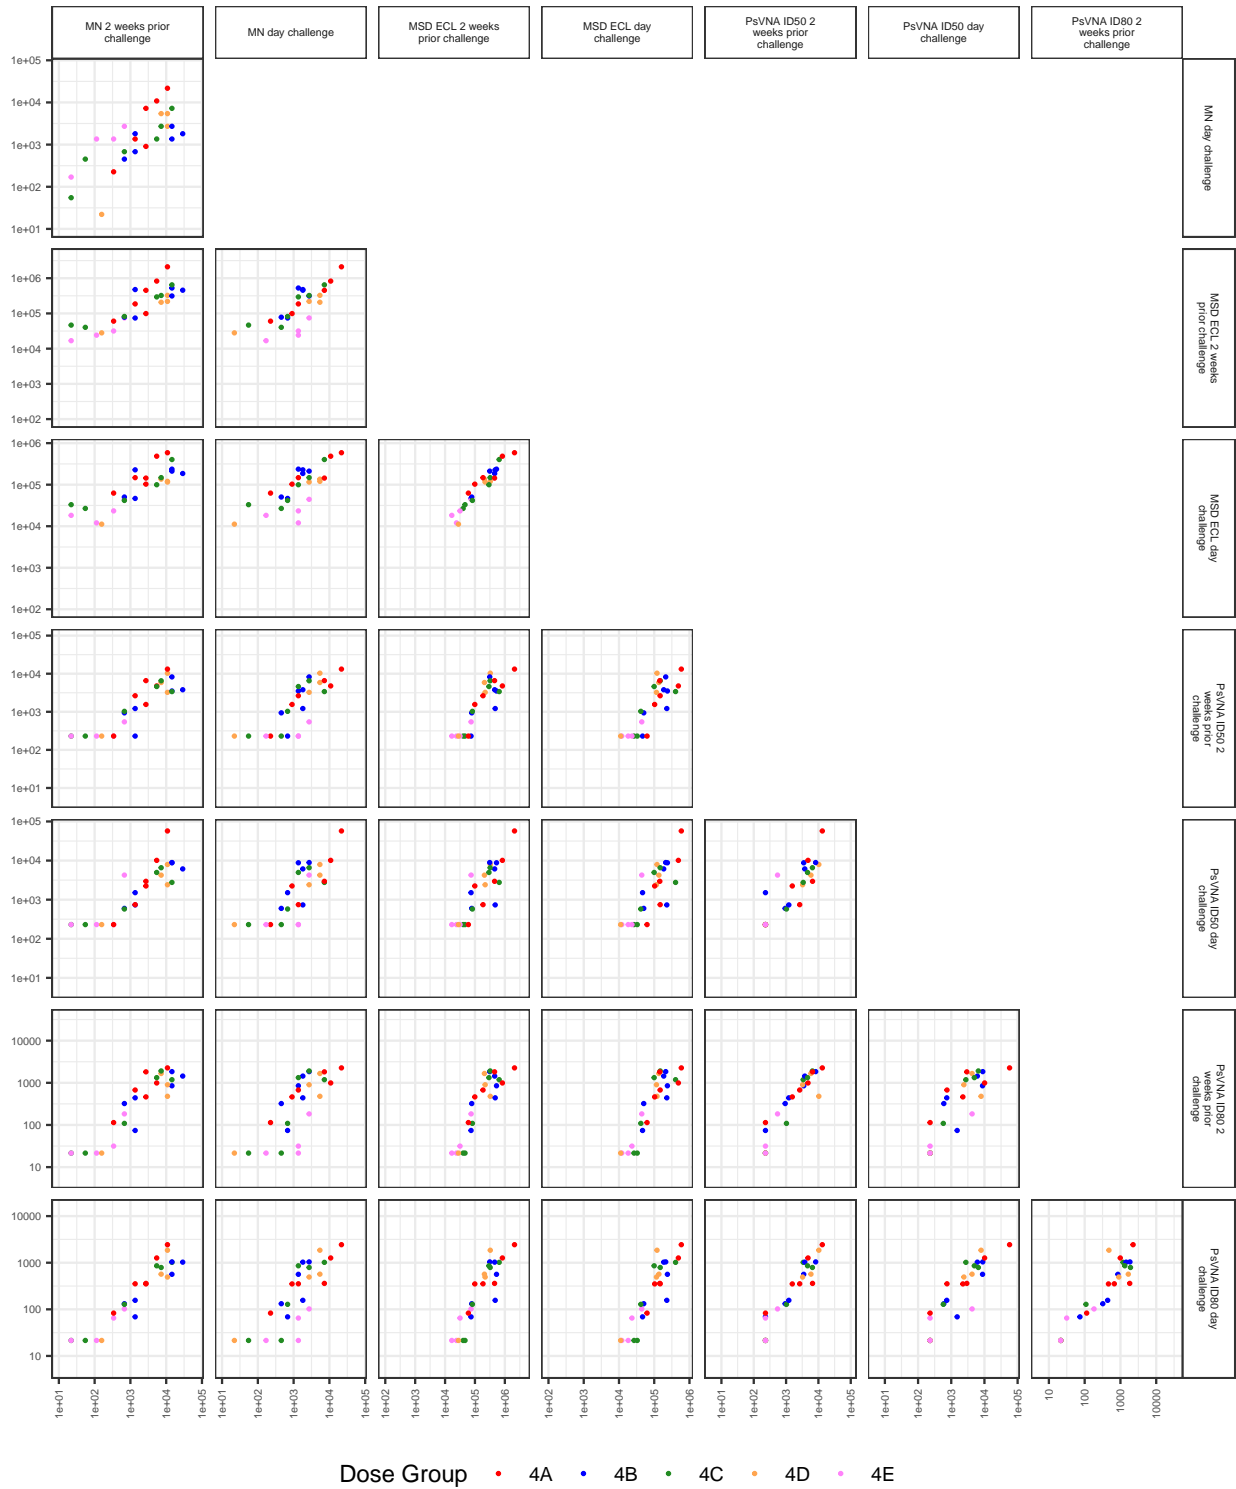

Figure 6.2.2

# Moderna

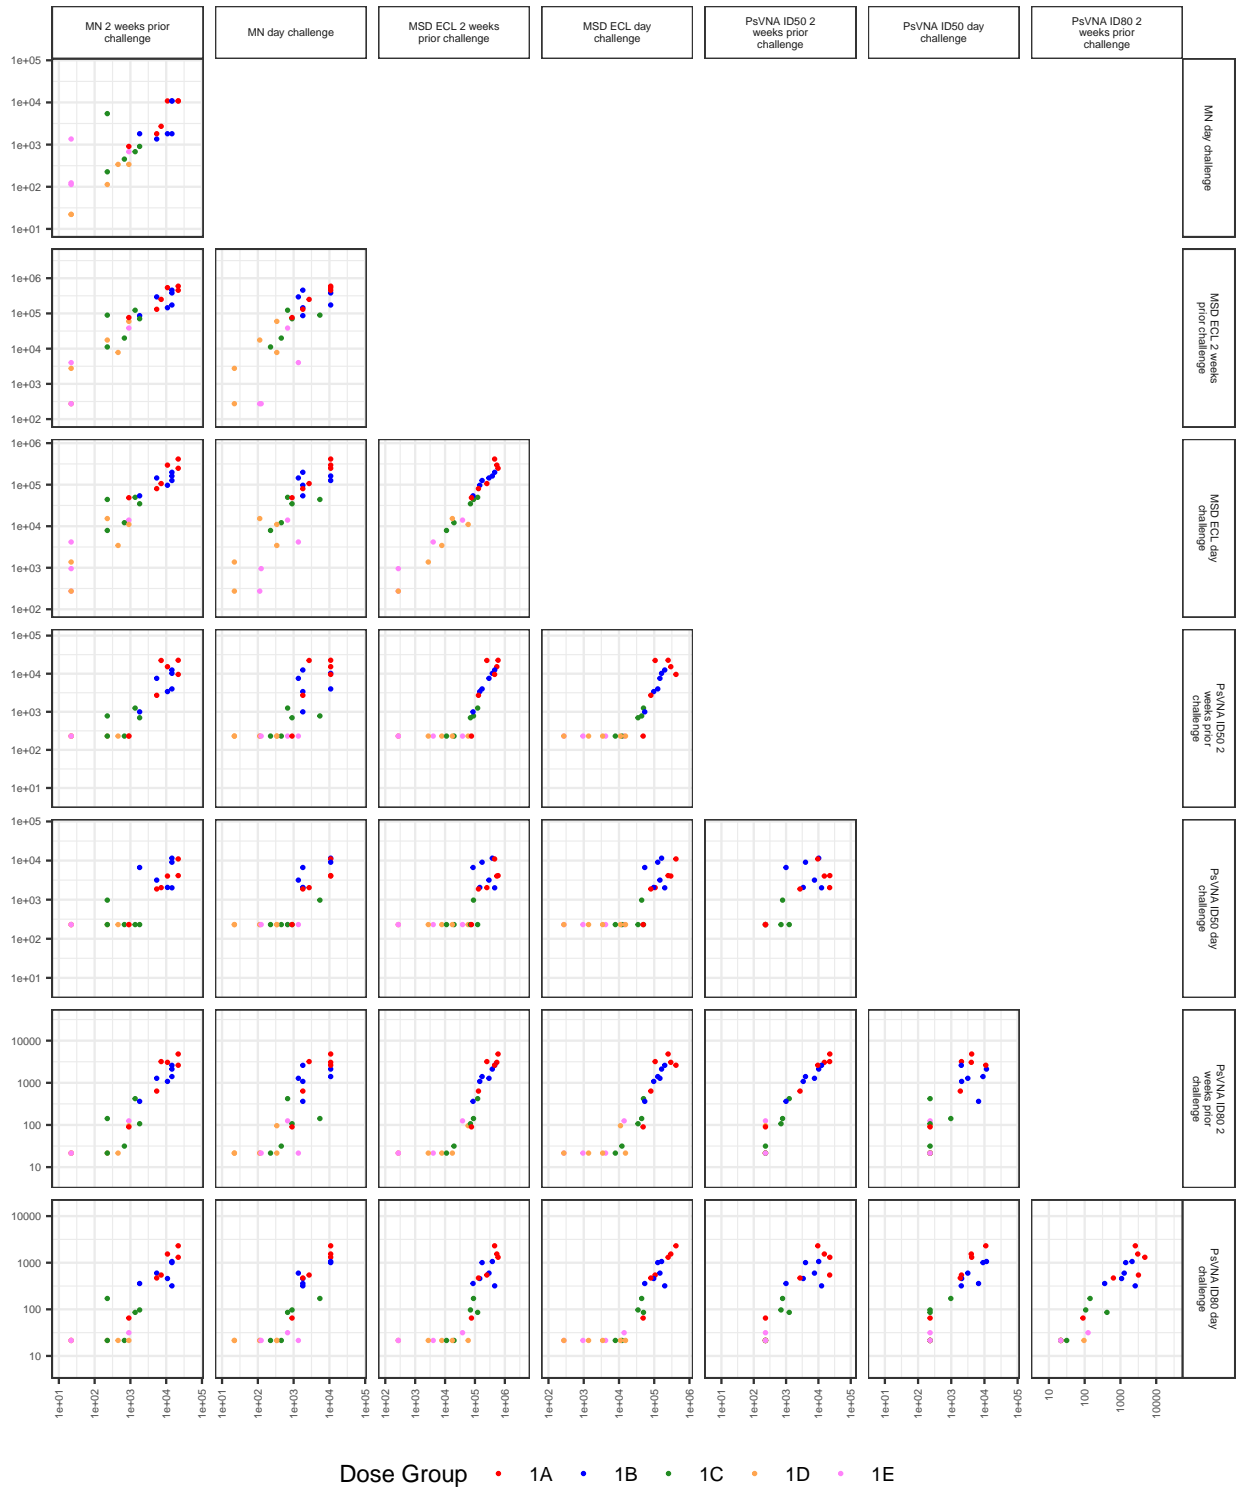

Figure 6.2.3

# Janssen

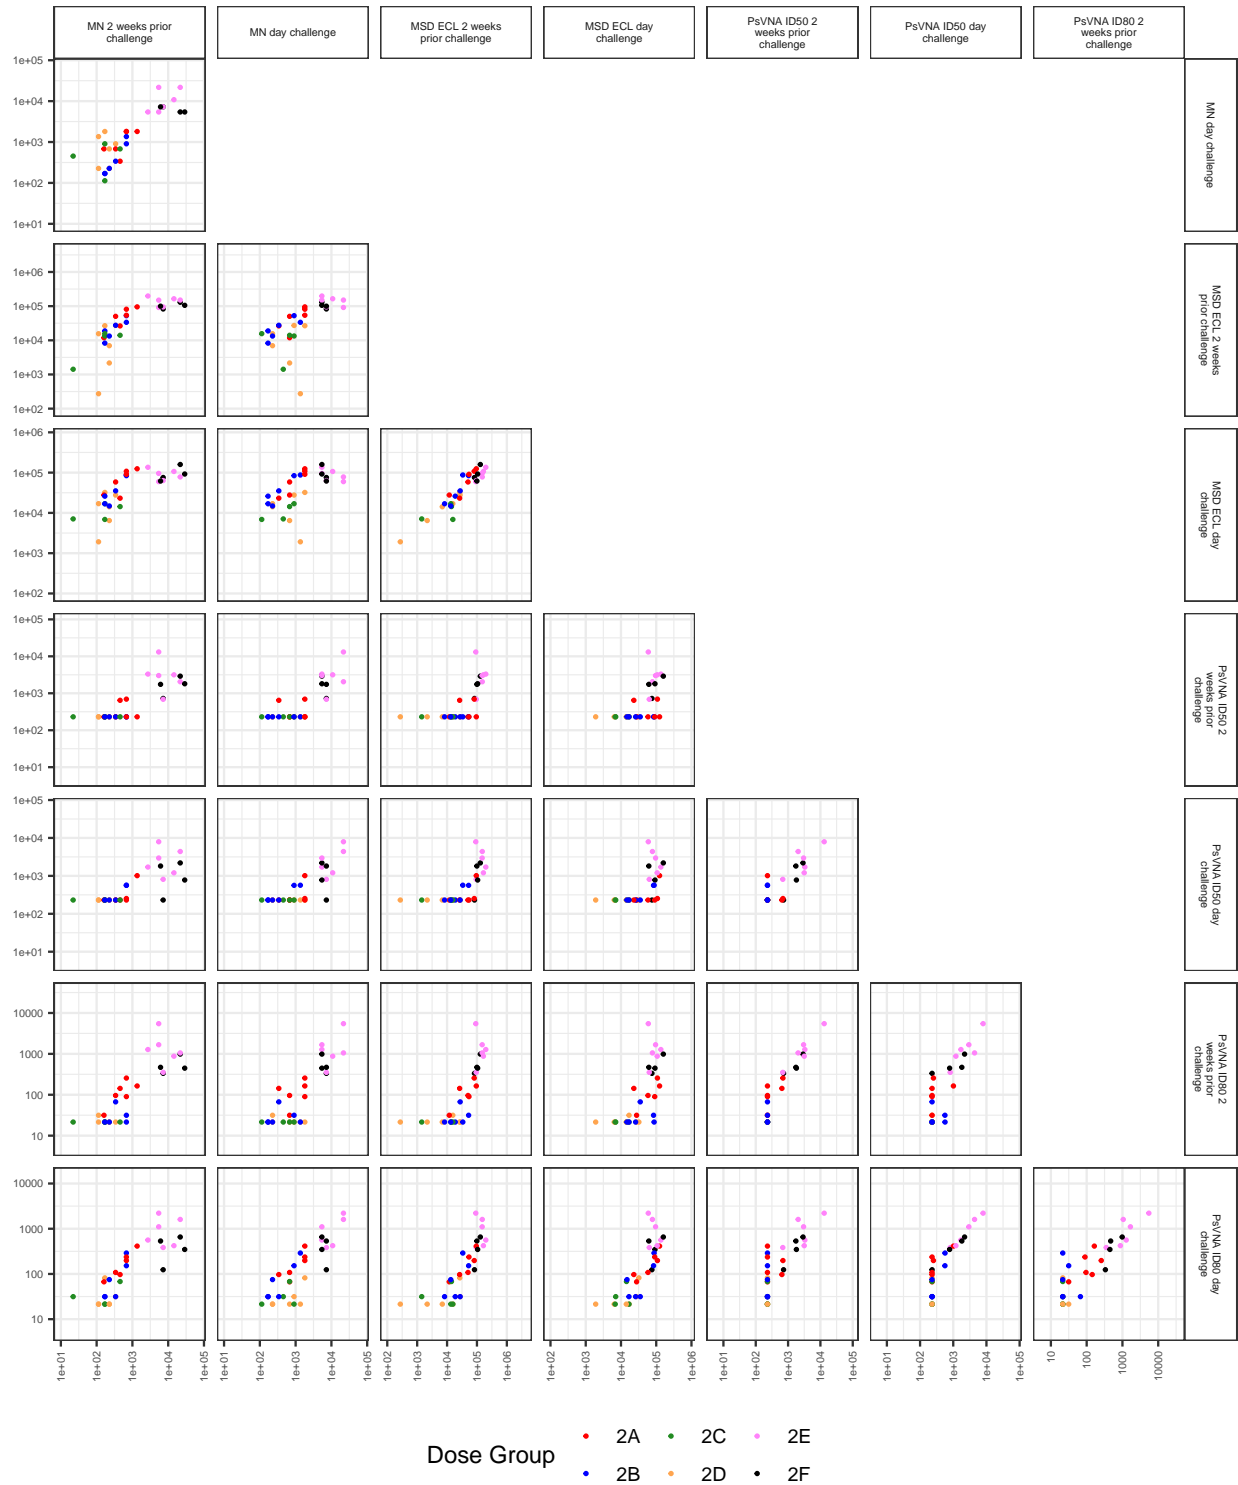

Figure 6.2.4

# Novavax

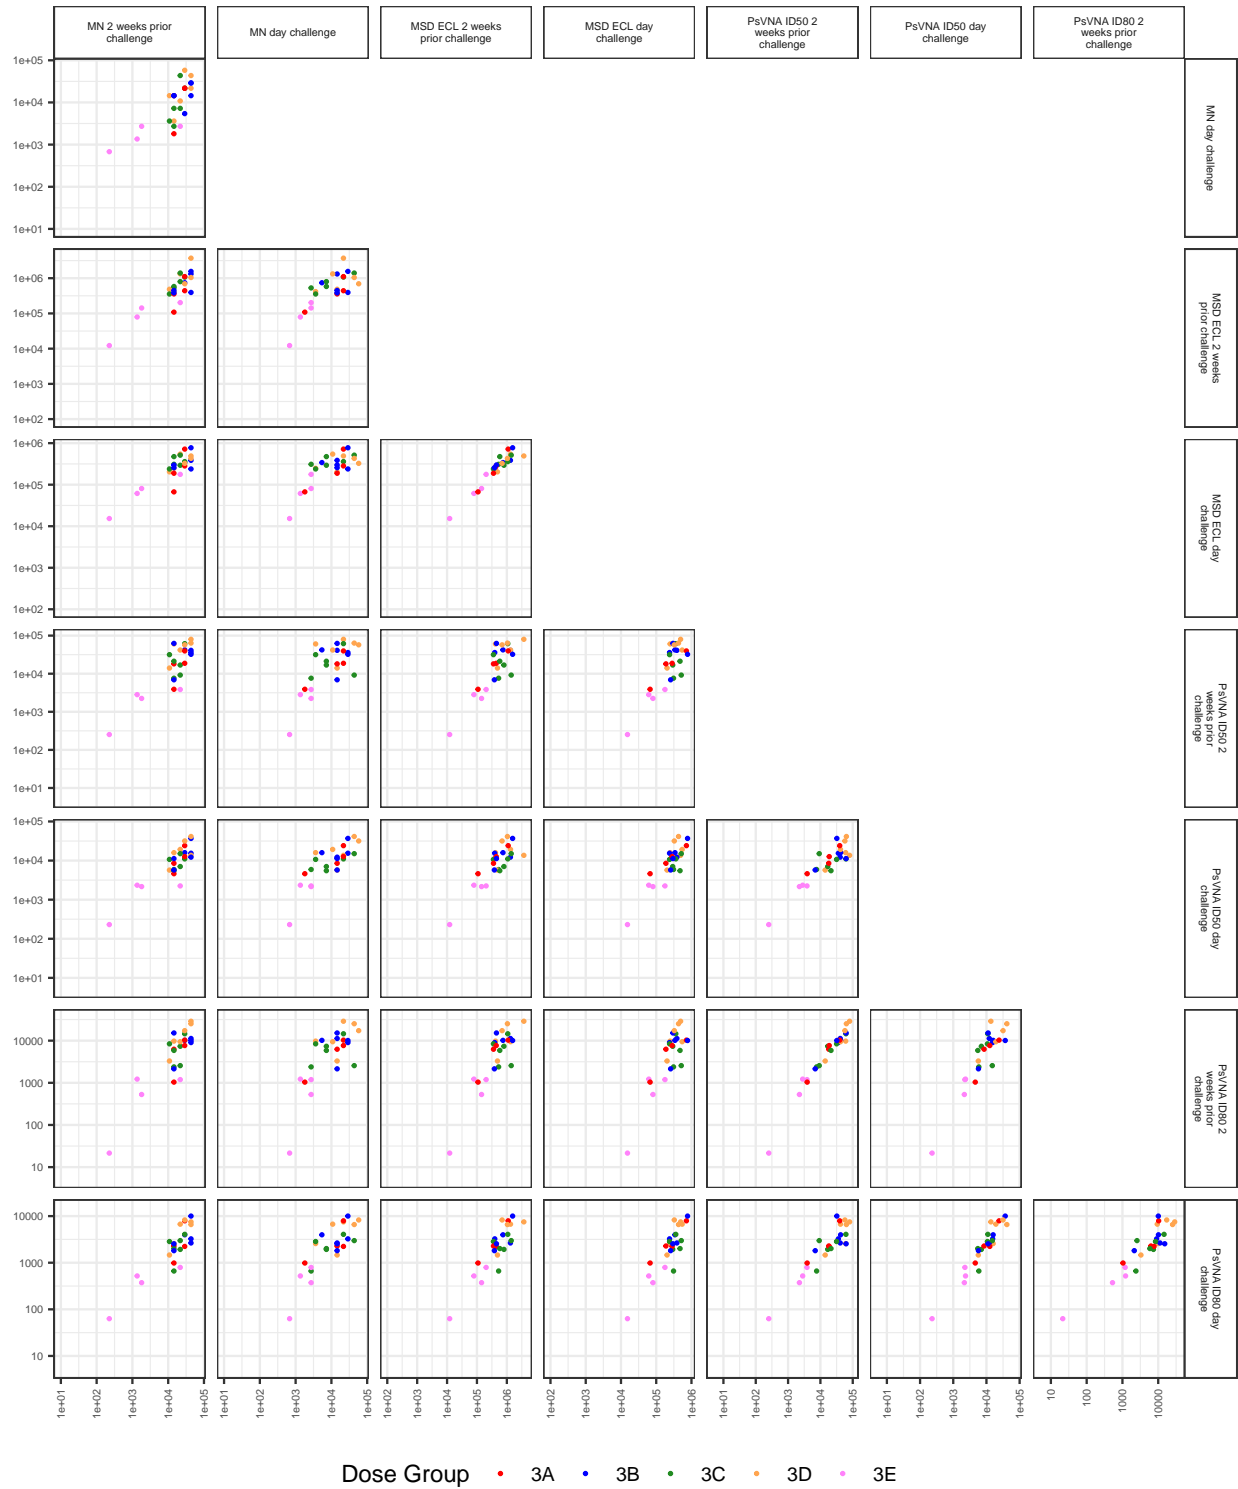

Figure 6.2.5

## Correlations

Simple statistics will be performed independent of the vaccine product. For example, the Spearman correlation between each pair of virus-specific antibodies will be calculated. Spearman (i.e., rank) correlations with confidence intervals will be generated; confidence intervals for the Spearman's correlation coefficient are calculated by using the ranks in a Pearson's correlation, which generally performs well (Caruso and Cliff, 1997). As there were not many ties, nonparametric bootstrap as a sensitivity analysis was not done.

Table 6.2.1: Spearman Correlations of Virus-Specific Antibodies

|                                                 | log<br>MN 2<br>weeks<br>prior<br>chal-<br>lenge | log<br>MN<br>day<br>chal-<br>lenge | log<br>MSD<br>ECL 2<br>weeks<br>prior<br>chal-<br>lenge | log<br>MSD<br>ECL<br>day<br>chal-<br>lenge | log<br>PsVNA<br>ID50 2<br>weeks<br>prior<br>chal-<br>lenge | log<br>PsVNA<br>ID50<br>day<br>chal-<br>lenge | log<br>PsVNA<br>ID80 2<br>weeks<br>prior<br>chal-<br>lenge | log<br>PsVNA<br>ID80<br>day<br>chal-<br>lenge |
|-------------------------------------------------|-------------------------------------------------|------------------------------------|---------------------------------------------------------|--------------------------------------------|------------------------------------------------------------|-----------------------------------------------|------------------------------------------------------------|-----------------------------------------------|
| log MN 2<br>weeks prior<br>challenge            | -                                               | -                                  | -                                                       | -                                          | -                                                          | -                                             | -                                                          | -                                             |
| log MN<br>day<br>challenge                      | 0.89<br>(0.85,<br>0.92)                         | -                                  | -                                                       | -                                          | -                                                          | -                                             | -                                                          | -                                             |
| log MSD<br>ECL 2<br>weeks prior<br>challenge    | 0.93<br>(0.9,<br>0.95)                          | 0.89<br>(0.84,<br>0.92)            | -                                                       | -                                          | -                                                          | -                                             | -                                                          | -                                             |
| log MSD<br>ECL day<br>challenge                 | 0.91<br>(0.88,<br>0.94)                         | 0.89<br>(0.84,<br>0.92)            | 0.98<br>(0.97,<br>0.98)                                 | -                                          | -                                                          | -                                             | -                                                          | -                                             |
| log PsVNA<br>ID50 2<br>weeks prior<br>challenge | 0.89<br>(0.85,<br>0.92)                         | 0.86<br>(0.8,<br>0.9)              | 0.91<br>(0.88,<br>0.94)                                 | 0.89<br>(0.84,<br>0.92)                    | -                                                          | -                                             | -                                                          | -                                             |
| log PsVNA<br>ID50 day<br>challenge              | 0.88<br>(0.83,<br>0.91)                         | 0.86<br>(0.81,<br>0.9)             | 0.9<br>(0.86,<br>0.93)                                  | 0.89<br>(0.85,<br>0.92)                    | 0.93<br>(0.9,<br>0.95)                                     | -                                             | -                                                          | -                                             |
| log PsVNA<br>ID80 2<br>weeks prior<br>challenge | 0.92<br>(0.89,<br>0.94)                         | 0.87<br>(0.83,<br>0.91)            | 0.93<br>(0.9,<br>0.95)                                  | 0.91<br>(0.88,<br>0.94)                    | 0.96<br>(0.94,<br>0.97)                                    | 0.92<br>(0.89,<br>0.94)                       | -                                                          | -                                             |
| log PsVNA<br>ID80 day<br>challenge              | 0.93<br>(0.9,<br>0.95)                          | 0.91<br>(0.88,<br>0.94)            | 0.93<br>(0.9,<br>0.95)                                  | 0.94<br>(0.91,<br>0.96)                    | 0.93<br>(0.91,<br>0.95)                                    | 0.94<br>(0.92,<br>0.96)                       | 0.95<br>(0.92,<br>0.96)                                    | -                                             |

## **Viral Load**

### **Plots**

Pairwise plots of each virus-specific antibody with each viral load measurement will be generated. Data will be plotted with different colors for dose group and different panels for vaccine product.

Placebo

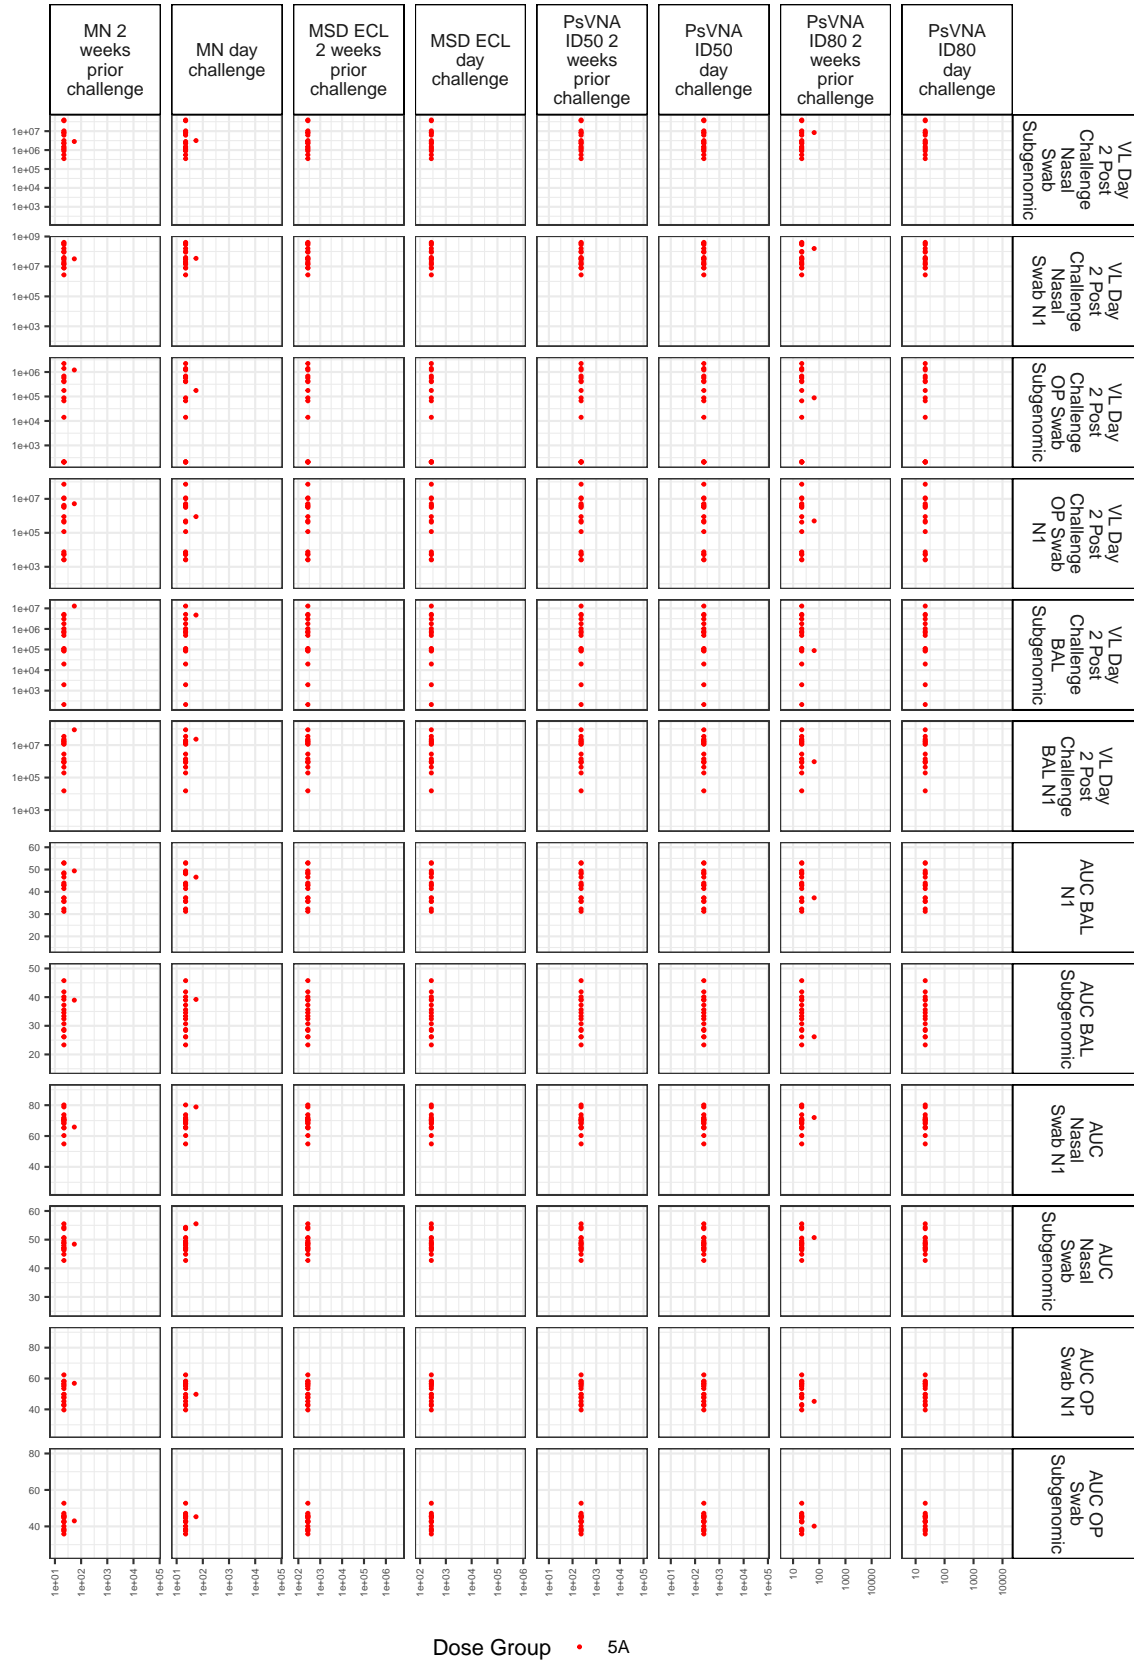

Figure 6.2.6

Sanofi

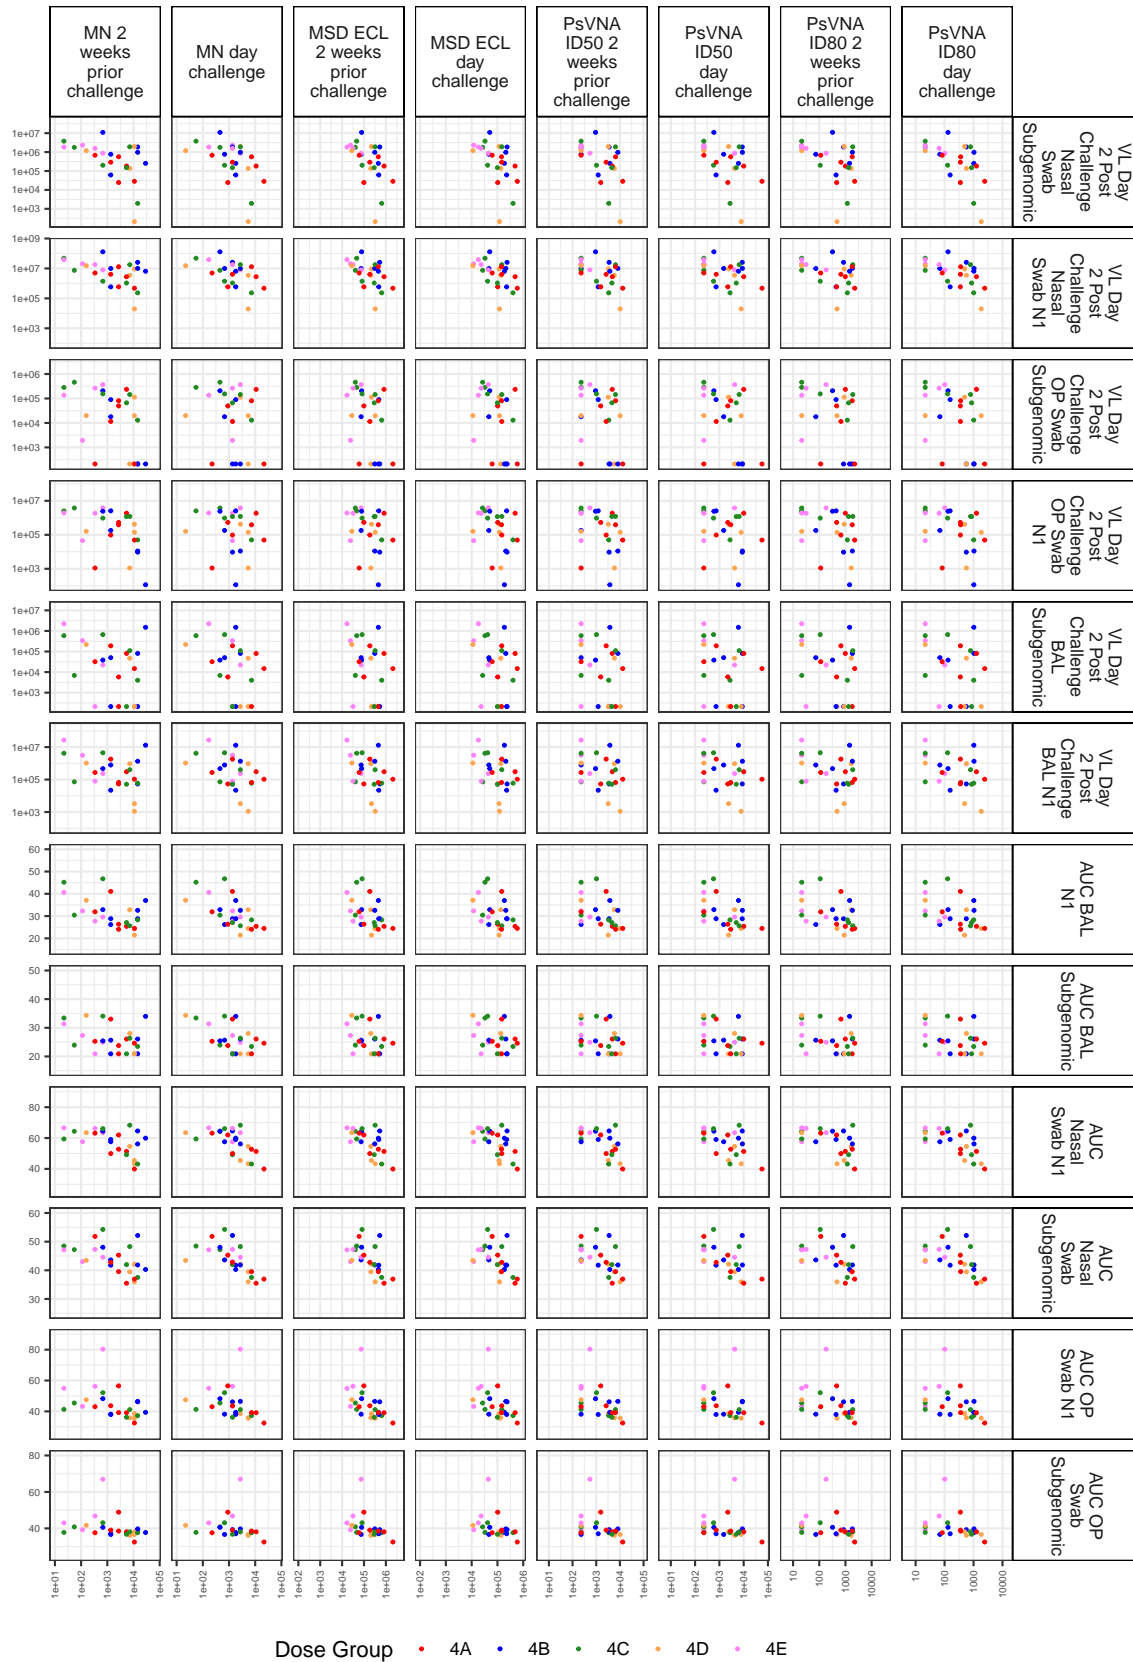

Figure 6.2.7

Moderna

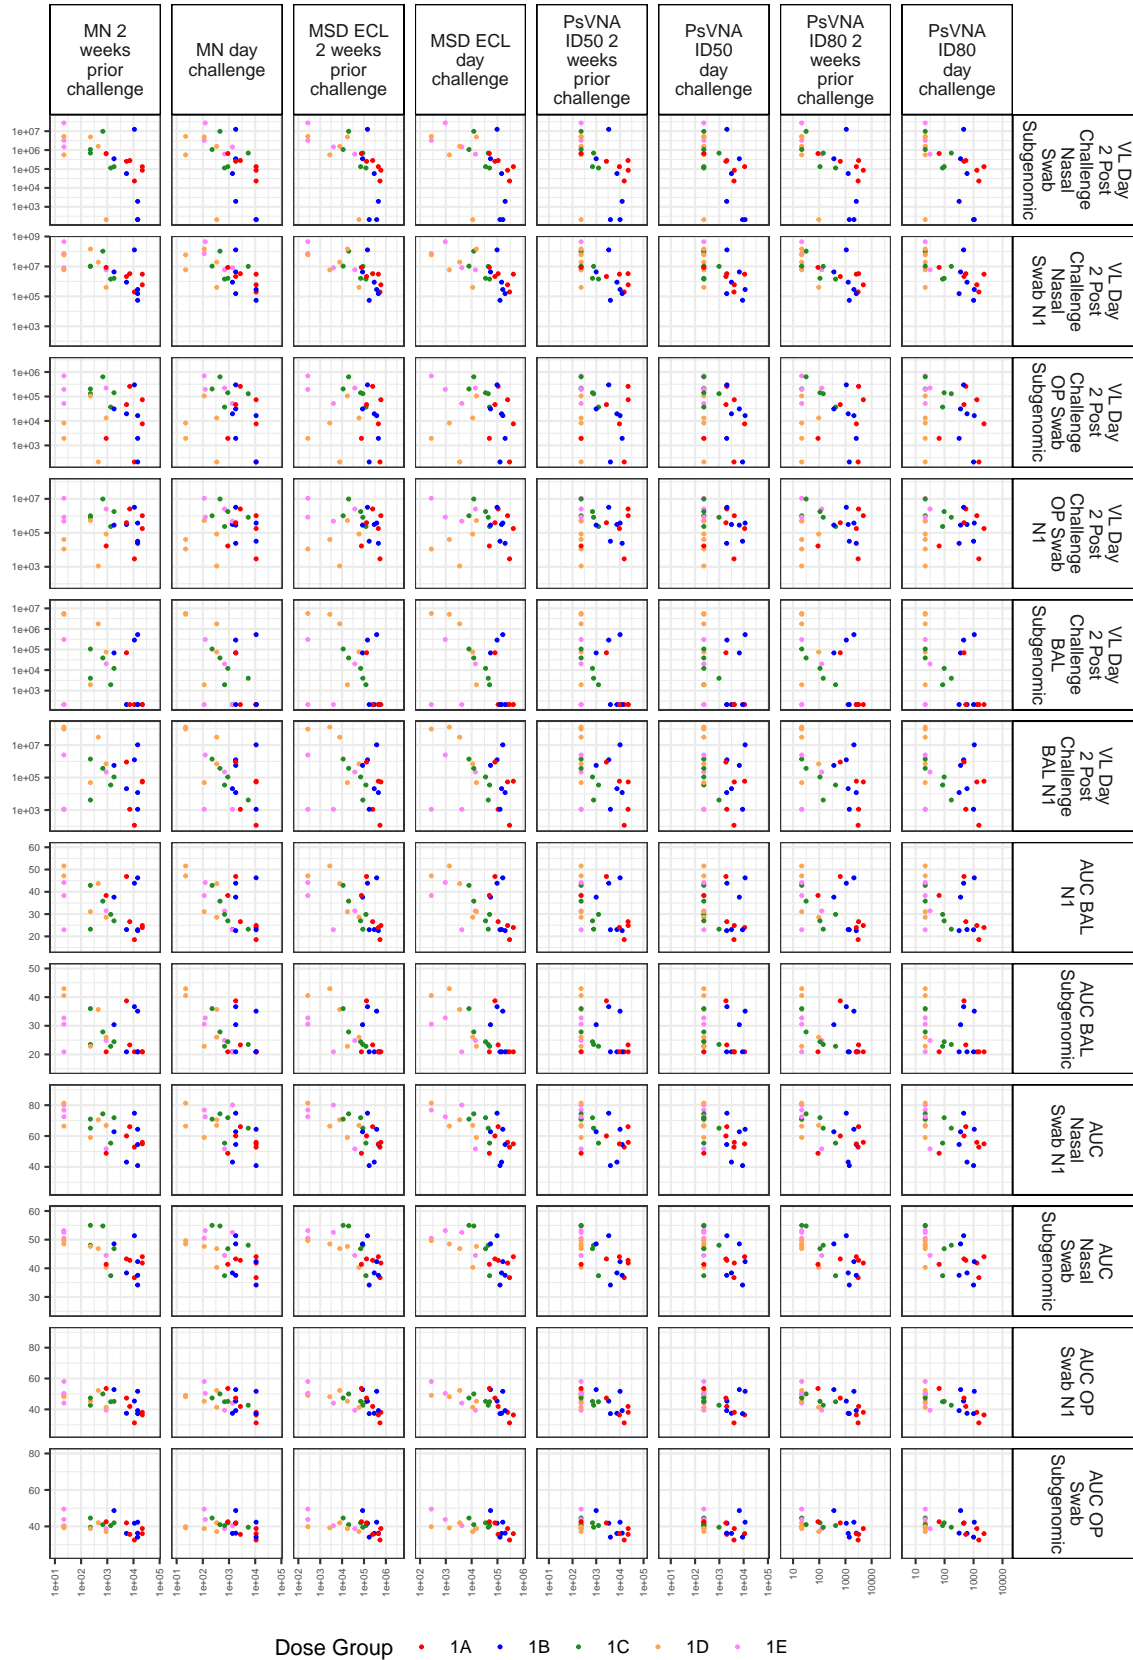

Figure 6.2.8

Janssen

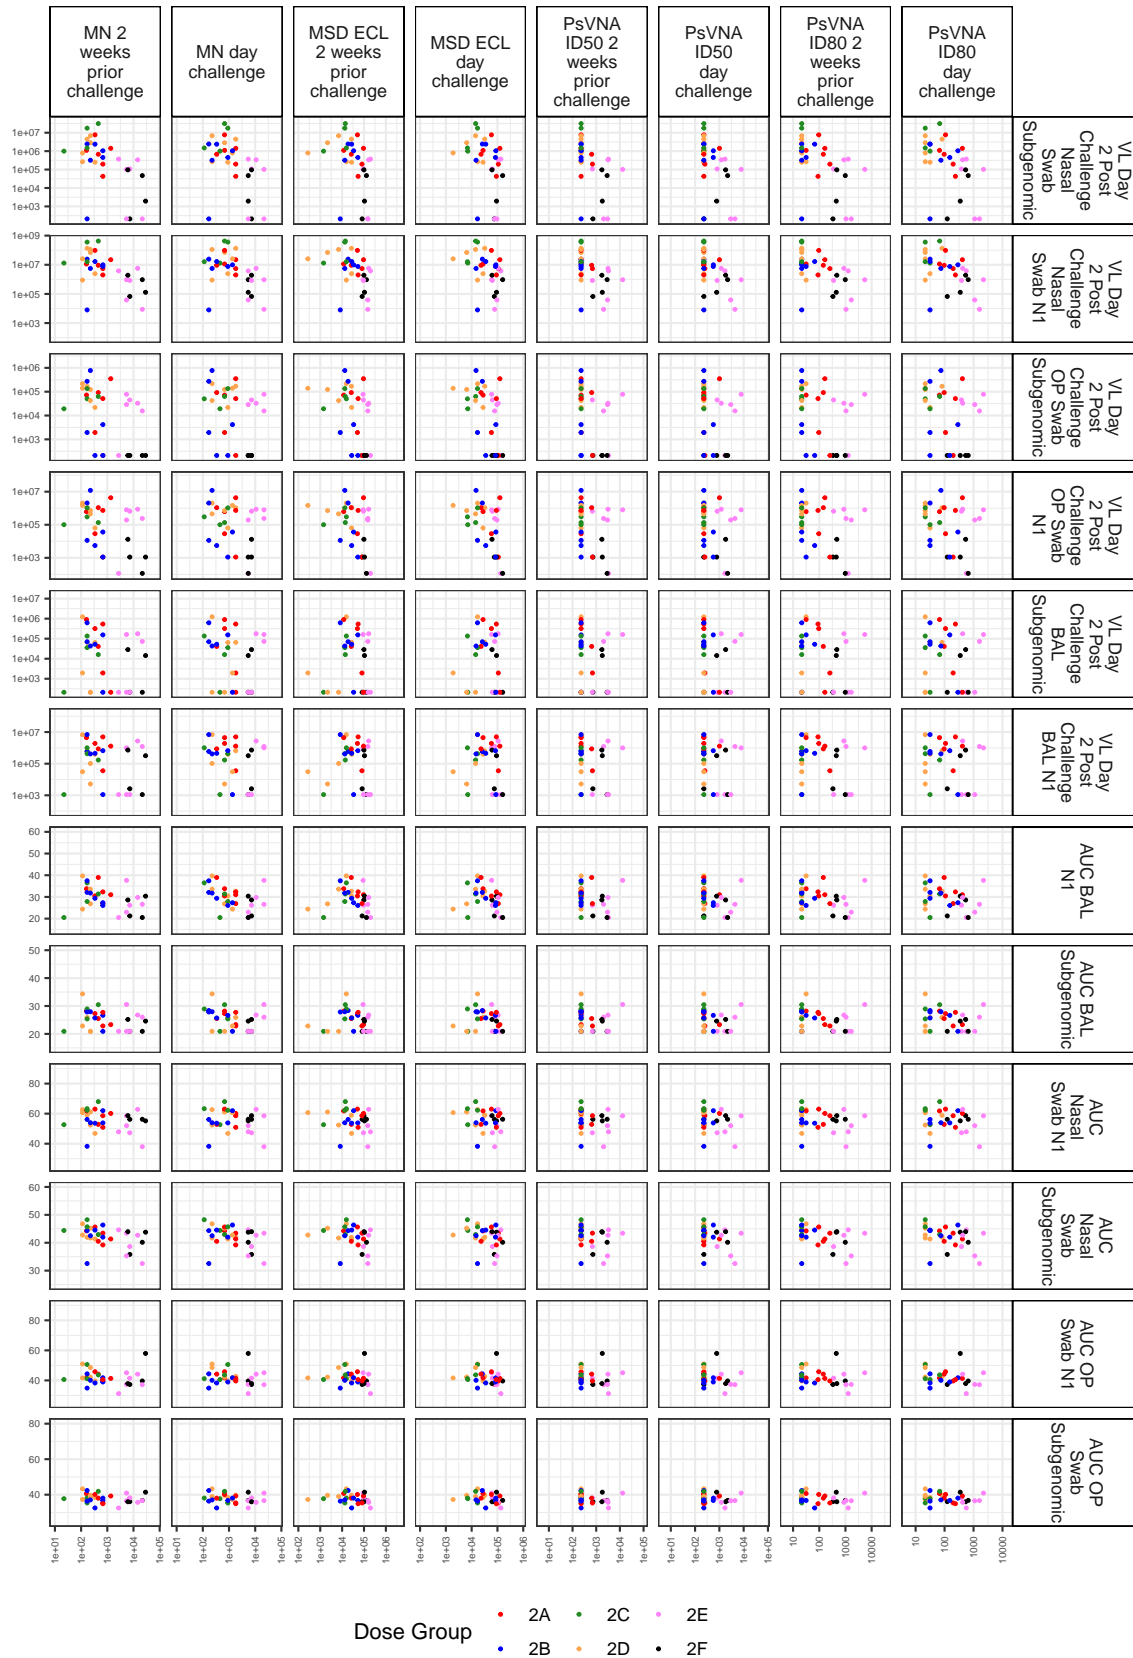

Figure 6.2.9

Novavax

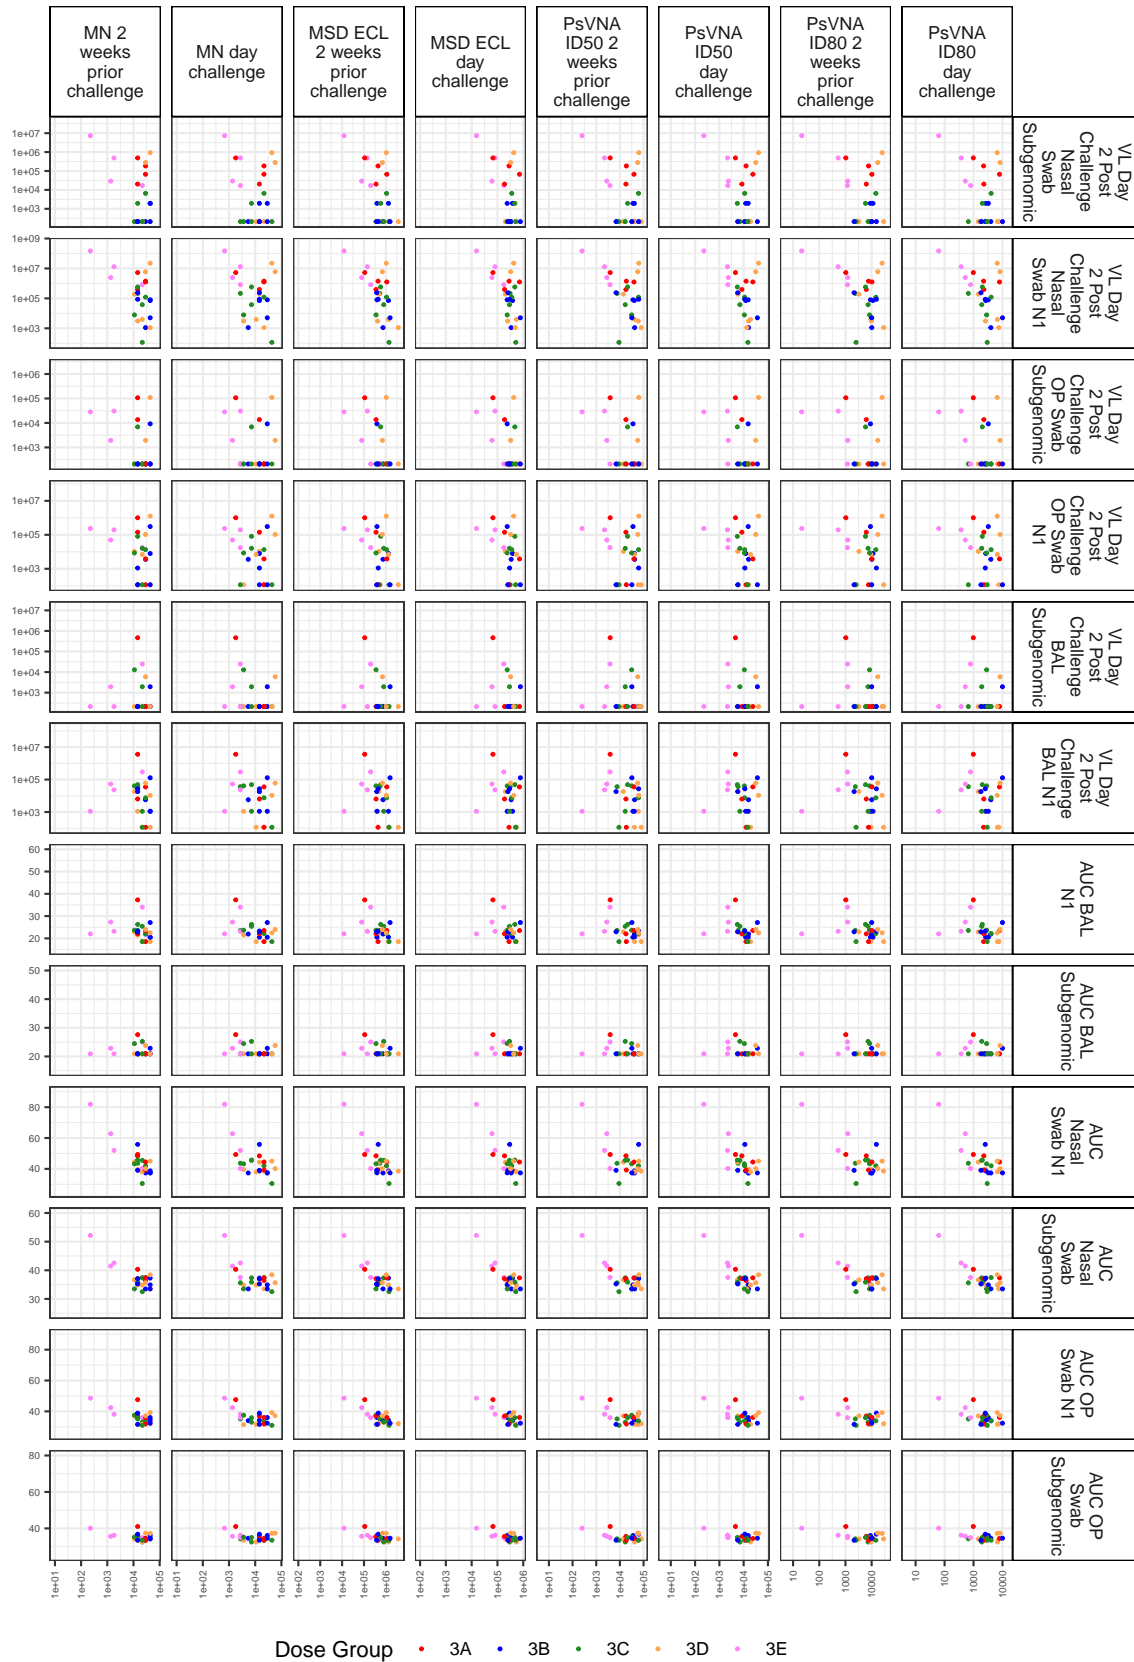

Dose Group • 3A • 3B • 3C • 3D • 3E

Figure 6.2.10

## **Correlations - Numeric Viral Load**

Spearman's correlations of all numeric viral load measurements with each other will be calculated.

Table 6.2.2: Spearman Correlations of Viral Load Outcomes

|                                                              | AUC<br>BAL<br>N1        | AUC<br>BAL<br>Subge-<br>nomic | AUC<br>Nasal<br>Swab<br>N1 | AUC<br>Nasal<br>Swab<br>Subge-<br>nomic | AUC<br>OP<br>Swab<br>N1 | AUC<br>OP<br>Swab<br>Subge-<br>nomic | log<br>VL<br>Day2<br>Post<br>Chal-<br>lenge<br>BAL<br>N1 | log<br>VL<br>Day2<br>Post<br>Chal-<br>lenge<br>BAL<br>Subge-<br>nomic | log<br>VL<br>Day2<br>Post<br>Chal-<br>lenge<br>OP-<br>swab<br>N1 | log<br>VL<br>Day2<br>Post<br>Chal-<br>lenge<br>OP-<br>swab<br>Subge-<br>nomic | log<br>VL<br>Day2<br>Post<br>Chal-<br>lenge<br>Nasal-<br>Swab<br>N1 | log<br>VL<br>Day2<br>Post<br>Chal-<br>lenge<br>Nasal-<br>Swab<br>Subge-<br>nomic |
|--------------------------------------------------------------|-------------------------|-------------------------------|----------------------------|-----------------------------------------|-------------------------|--------------------------------------|----------------------------------------------------------|-----------------------------------------------------------------------|------------------------------------------------------------------|-------------------------------------------------------------------------------|---------------------------------------------------------------------|----------------------------------------------------------------------------------|
| AUC BAL<br>N1                                                | -                       | -                             | -                          | -                                       | -                       | -                                    | -                                                        | -                                                                     | -                                                                | -                                                                             | -                                                                   | -                                                                                |
| AUC BAL<br>Subgenomic                                        | 0.88<br>(0.83,<br>0.91) | -                             | -                          | -                                       | -                       | -                                    | -                                                        | -                                                                     | -                                                                | -                                                                             | -                                                                   | -                                                                                |
| AUC Nasal<br>Swab N1                                         | 0.61<br>(0.49,<br>0.71) | 0.59<br>(0.46,<br>0.69)       | -                          | -                                       | -                       | -                                    | -                                                        | -                                                                     | -                                                                | -                                                                             | -                                                                   | -                                                                                |
| AUC Nasal<br>Swab<br>Subgenomic                              | 0.62<br>(0.5,<br>0.72)  | 0.55<br>(0.42,<br>0.66)       | 0.87<br>(0.82,<br>0.91)    | -                                       | -                       | -                                    | -                                                        | -                                                                     | -                                                                | -                                                                             | -                                                                   | -                                                                                |
| AUC OP<br>Swab N1                                            | 0.73<br>(0.64,<br>0.81) | 0.61<br>(0.49,<br>0.71)       | 0.78<br>(0.7,<br>0.84)     | 0.76<br>(0.67,<br>0.82)                 | -                       | -                                    | -                                                        | -                                                                     | -                                                                | -                                                                             | -                                                                   | -                                                                                |
| AUC OP<br>Swab<br>Subgenomic                                 | 0.7<br>(0.6,<br>0.78)   | 0.59<br>(0.46,<br>0.69)       | 0.69<br>(0.59,<br>0.78)    | 0.69<br>(0.59,<br>0.77)                 | 0.89<br>(0.85,<br>0.92) | -                                    | -                                                        | -                                                                     | -                                                                | -                                                                             | -                                                                   | -                                                                                |
| log VL Day2<br>PostChal-<br>lenge BAL<br>N1                  | 0.86<br>(0.81,<br>0.9)  | 0.88<br>(0.83,<br>0.91)       | 0.48<br>(0.33,<br>0.61)    | 0.47<br>(0.32,<br>0.6)                  | 0.57<br>(0.44,<br>0.68) | 0.55<br>(0.41,<br>0.66)              | -                                                        | -                                                                     | -                                                                | -                                                                             | -                                                                   | -                                                                                |
| log VL Day2<br>PostChal-<br>lenge BAL<br>Subgenomic          | 0.82<br>(0.75,<br>0.87) | 0.93<br>(0.9,<br>0.95)        | 0.48<br>(0.33,<br>0.6)     | 0.47<br>(0.32,<br>0.6)                  | 0.55<br>(0.42,<br>0.66) | 0.52<br>(0.37,<br>0.63)              | 0.93<br>(0.9,<br>0.95)                                   | -                                                                     | -                                                                | -                                                                             | -                                                                   | -                                                                                |
| log VL Day2<br>PostChal-<br>lenge<br>OPswab N1               | 0.43<br>(0.27,<br>0.56) | 0.35<br>(0.19,<br>0.5)        | 0.45<br>(0.3,<br>0.58)     | 0.47<br>(0.32,<br>0.59)                 | 0.52<br>(0.38,<br>0.64) | 0.57<br>(0.44,<br>0.68)              | 0.31<br>(0.14,<br>0.46)                                  | 0.27<br>(0.1,<br>0.42)                                                | -                                                                | -                                                                             | -                                                                   | -                                                                                |
| log VL Day2<br>PostChal-<br>lenge<br>OPswab<br>Subgenomic    | 0.45<br>(0.3,<br>0.58)  | 0.39<br>(0.23,<br>0.52)       | 0.5<br>(0.35,<br>0.62)     | 0.51<br>(0.37,<br>0.63)                 | 0.55<br>(0.42,<br>0.66) | 0.63<br>(0.51,<br>0.73)              | 0.33<br>(0.16,<br>0.48)                                  | 0.3<br>(0.13,<br>0.45)                                                | 0.97<br>(0.95,<br>0.98)                                          | -                                                                             | -                                                                   | -                                                                                |
| log VL Day2<br>PostChal-<br>lenge<br>NasalSwab<br>N1         | 0.55<br>(0.41,<br>0.66) | 0.47<br>(0.32,<br>0.6)        | 0.71<br>(0.61,<br>0.79)    | 0.75<br>(0.67,<br>0.82)                 | 0.66<br>(0.55,<br>0.75) | 0.59<br>(0.46,<br>0.69)              | 0.45<br>(0.3,<br>0.58)                                   | 0.41<br>(0.25,<br>0.55)                                               | 0.48<br>(0.33,<br>0.6)                                           | 0.54<br>(0.4,<br>0.65)                                                        | -                                                                   | -                                                                                |
| log VL Day2<br>PostChal-<br>lenge<br>NasalSwab<br>Subgenomic | 0.55<br>(0.42,<br>0.66) | 0.48<br>(0.34,<br>0.61)       | 0.71<br>(0.61,<br>0.79)    | 0.79<br>(0.71,<br>0.85)                 | 0.67<br>(0.56,<br>0.75) | 0.61<br>(0.49,<br>0.71)              | 0.45<br>(0.3,<br>0.58)                                   | 0.43<br>(0.27,<br>0.56)                                               | 0.48<br>(0.33,<br>0.6)                                           | 0.54<br>(0.4,<br>0.65)                                                        | 0.97<br>(0.96,<br>0.98)                                             | -                                                                                |

For numeric viral load, Spearman correlations with each virus-specific Ab will be calculated.

Table 6.2.3: Spearman Correlations of Virus-Specific Antibodies with Viral Load Measurements

|                                                              | log<br>MN 2<br>weeks<br>prior<br>chal-<br>lenge | log<br>MN<br>day<br>chal-<br>lenge | log<br>MSD<br>ECL 2<br>weeks<br>prior<br>chal-<br>lenge | log<br>MSD<br>ECL<br>day<br>chal-<br>lenge | log<br>PsVNA<br>ID50 2<br>weeks<br>prior<br>chal-<br>lenge | log<br>PsVNA<br>ID50<br>day<br>chal-<br>lenge | log<br>PsVNA<br>ID80 2<br>weeks<br>prior<br>chal-<br>lenge | log<br>PsVNA<br>ID80<br>day<br>chal-<br>lenge |
|--------------------------------------------------------------|-------------------------------------------------|------------------------------------|---------------------------------------------------------|--------------------------------------------|------------------------------------------------------------|-----------------------------------------------|------------------------------------------------------------|-----------------------------------------------|
| AUC BAL<br>N1                                                | -0.63<br>(-0.72,<br>-0.51)                      | -0.71<br>(-0.79,<br>-0.61)         | -0.65<br>(-0.74,<br>-0.54)                              | -0.67<br>(-0.75,<br>-0.56)                 | -0.62<br>(-0.72,<br>-0.5)                                  | -0.59<br>(-0.69,<br>-0.46)                    | -0.63<br>(-0.72,<br>-0.51)                                 | -0.65<br>(-0.74,<br>-0.54)                    |
| AUC BAL<br>Subgenomic                                        | -0.57<br>(-0.68,<br>-0.44)                      | -0.62<br>(-0.72,<br>-0.5)          | -0.59<br>(-0.69,<br>-0.47)                              | -0.61<br>(-0.71,<br>-0.48)                 | -0.54<br>(-0.66,<br>-0.41)                                 | -0.5<br>(-0.62,<br>-0.35)                     | -0.55<br>(-0.66,<br>-0.42)                                 | -0.57<br>(-0.67,<br>-0.43)                    |
| AUC Nasal<br>Swab N1                                         | -0.69<br>(-0.77,<br>-0.59)                      | -0.69<br>(-0.77,<br>-0.58)         | -0.7<br>(-0.78,<br>-0.6)                                | -0.73<br>(-0.8,<br>-0.63)                  | -0.63<br>(-0.73,<br>-0.52)                                 | -0.65<br>(-0.74,<br>-0.53)                    | -0.66<br>(-0.75,<br>-0.55)                                 | -0.73<br>(-0.8,<br>-0.63)                     |
| AUC Nasal<br>Swab<br>Subgenomic                              | -0.72<br>(-0.8,<br>-0.63)                       | -0.73<br>(-0.8,<br>-0.63)          | -0.72<br>(-0.79,<br>-0.62)                              | -0.73<br>(-0.8,<br>-0.63)                  | -0.67<br>(-0.76,<br>-0.57)                                 | -0.65<br>(-0.74,<br>-0.54)                    | -0.7<br>(-0.78,<br>-0.6)                                   | -0.74<br>(-0.81,<br>-0.66)                    |
| AUC OP<br>Swab N1                                            | -0.66<br>(-0.75,<br>-0.54)                      | -0.68<br>(-0.77,<br>-0.58)         | -0.71<br>(-0.79,<br>-0.61)                              | -0.72<br>(-0.8,<br>-0.63)                  | -0.65<br>(-0.74,<br>-0.53)                                 | -0.63<br>(-0.72,<br>-0.51)                    | -0.67<br>(-0.76,<br>-0.56)                                 | -0.72<br>(-0.79,<br>-0.62)                    |
| AUC OP<br>Swab<br>Subgenomic                                 | -0.59<br>(-0.7,<br>-0.47)                       | -0.61<br>(-0.71,<br>-0.48)         | -0.62<br>(-0.72,<br>-0.5)                               | -0.65<br>(-0.74,<br>-0.54)                 | -0.58<br>(-0.69,<br>-0.45)                                 | -0.55<br>(-0.66,<br>-0.41)                    | -0.61<br>(-0.71,<br>-0.49)                                 | -0.63<br>(-0.72,<br>-0.51)                    |
| log VL Day2<br>PostChal-<br>lenge BAL<br>N1                  | -0.5<br>(-0.62,<br>-0.35)                       | -0.57<br>(-0.67,<br>-0.43)         | -0.52<br>(-0.64,<br>-0.38)                              | -0.53<br>(-0.64,<br>-0.39)                 | -0.53<br>(-0.65,<br>-0.4)                                  | -0.47<br>(-0.6,<br>-0.32)                     | -0.5<br>(-0.62,<br>-0.36)                                  | -0.52<br>(-0.64,<br>-0.38)                    |
| log VL Day2<br>PostChal-<br>lenge BAL<br>Subgenomic          | -0.52<br>(-0.64,<br>-0.38)                      | -0.56<br>(-0.67,<br>-0.43)         | -0.54<br>(-0.65,<br>-0.4)                               | -0.54<br>(-0.66,<br>-0.41)                 | -0.53<br>(-0.64,<br>-0.39)                                 | -0.47<br>(-0.6,<br>-0.33)                     | -0.51<br>(-0.63,<br>-0.37)                                 | -0.52<br>(-0.64,<br>-0.38)                    |
| log VL Day2<br>PostChal-<br>lenge<br>OPswab N1               | -0.42<br>(-0.56,<br>-0.27)                      | -0.35<br>(-0.5,<br>-0.19)          | -0.38<br>(-0.52,<br>-0.22)                              | -0.42<br>(-0.55,<br>-0.26)                 | -0.37<br>(-0.51,<br>-0.21)                                 | -0.37<br>(-0.51,<br>-0.21)                    | -0.39<br>(-0.53,<br>-0.23)                                 | -0.4<br>(-0.54,<br>-0.25)                     |
| log VL Day2<br>PostChal-<br>lenge<br>OPswab<br>Subgenomic    | -0.49<br>(-0.61,<br>-0.34)                      | -0.41<br>(-0.55,<br>-0.26)         | -0.45<br>(-0.58,<br>-0.3)                               | -0.48<br>(-0.61,<br>-0.33)                 | -0.44<br>(-0.57,<br>-0.29)                                 | -0.44<br>(-0.57,<br>-0.29)                    | -0.46<br>(-0.59,<br>-0.31)                                 | -0.47<br>(-0.6,<br>-0.32)                     |
| log VL Day2<br>PostChal-<br>lenge<br>NasalSwab<br>N1         | -0.7<br>(-0.78,<br>-0.6)                        | -0.67<br>(-0.76,<br>-0.56)         | -0.7<br>(-0.78,<br>-0.6)                                | -0.69<br>(-0.77,<br>-0.58)                 | -0.69<br>(-0.77,<br>-0.58)                                 | -0.64<br>(-0.74,<br>-0.53)                    | -0.71<br>(-0.79,<br>-0.61)                                 | -0.71<br>(-0.79,<br>-0.61)                    |
| log VL Day2<br>PostChal-<br>lenge<br>NasalSwab<br>Subgenomic | -0.72<br>(-0.79,<br>-0.62)                      | -0.69<br>(-0.78,<br>-0.59)         | -0.71<br>(-0.79,<br>-0.61)                              | -0.7<br>(-0.78,<br>-0.6)                   | -0.7<br>(-0.78,<br>-0.59)                                  | -0.66<br>(-0.75,<br>-0.55)                    | -0.72<br>(-0.79,<br>-0.62)                                 | -0.72<br>(-0.8,<br>-0.63)                     |

## GMR - Binary Viral Load

For binary viral load, the geometric mean ratio (GMR) as the geometric mean of the virus-specific antibodies from those animals with a positive signal for the viral load measurement (e.g., viral sub-genomic RNA for nasal swab at day 2 post-challenge) over the geometric mean of the virus-specific antibodies from those animals without a positive signal will be calculated. The confidence interval and tests on the GMR will be calculated by t-test on the difference in means of the log<sub>10</sub> virus-specific antibody values, and back-transforming it to GMRs. NA is indicated when the binary responses are the same.

Table 6.2.4: Geometric Mean Ratios of Virus-Specific Antibodies with Binary Viral Load Measurements

|                                                 | bin VL<br>Day2<br>PostChal-<br>lenge BAL<br>N1 | bin VL<br>Day2<br>PostChal-<br>lenge BAL<br>Subge-<br>nomic | bin VL<br>Day2<br>PostChal-<br>lenge<br>OPswab<br>N1 | bin VL<br>Day2<br>PostChal-<br>lenge<br>OPswab<br>Subge-<br>nomic | bin VL<br>Day2<br>PostChal-<br>lenge<br>NasalSwab<br>N1 | bin VL<br>Day2<br>PostChal-<br>lenge<br>NasalSwab<br>Subge-<br>nomic |
|-------------------------------------------------|------------------------------------------------|-------------------------------------------------------------|------------------------------------------------------|-------------------------------------------------------------------|---------------------------------------------------------|----------------------------------------------------------------------|
| log MN 2<br>weeks prior<br>challenge            | 0.04 (0.02,<br>0.09)                           | 0.11 (0.05,<br>0.25)                                        | 0.05 (0.02,<br>0.09)                                 | 0.13 (0.05,<br>0.34)                                              | 0.05 (NA)                                               | 0.07 (0.03,<br>0.14)                                                 |
| log MN<br>day<br>challenge                      | 0.05 (0.03,<br>0.11)                           | 0.13 (0.06,<br>0.25)                                        | 0.1 (0.04,<br>0.23)                                  | 0.27 (0.12,<br>0.63)                                              | 0.02 (NA)                                               | 0.12 (0.06,<br>0.24)                                                 |
| log MSD<br>ECL 2<br>weeks prior<br>challenge    | 0.03 (0.01,<br>0.1)                            | 0.12 (0.05,<br>0.29)                                        | 0.06 (0.03,<br>0.14)                                 | 0.2 (0.07,<br>0.56)                                               | 0.03 (NA)                                               | 0.08 (0.04,<br>0.18)                                                 |
| log MSD<br>ECL day<br>challenge                 | 0.07 (0.04,<br>0.12)                           | 0.15 (0.07,<br>0.31)                                        | 0.09 (0.05,<br>0.16)                                 | 0.26 (0.1,<br>0.63)                                               | 0.06 (NA)                                               | 0.13 (0.07,<br>0.26)                                                 |
| log PsVNA<br>ID50 2<br>weeks prior<br>challenge | 0.05 (0.02,<br>0.15)                           | 0.15 (0.08,<br>0.29)                                        | 0.1 (0.04,<br>0.24)                                  | 0.19 (0.09,<br>0.41)                                              | 0.15 (NA)                                               | 0.11 (0.05,<br>0.27)                                                 |
| log PsVNA<br>ID50 day<br>challenge              | 0.09 (0.04,<br>0.19)                           | 0.23 (0.13,<br>0.42)                                        | 0.12 (0.06,<br>0.25)                                 | 0.25 (0.13,<br>0.48)                                              | 0.07 (NA)                                               | 0.15 (0.07,<br>0.32)                                                 |
| log PsVNA<br>ID80 2<br>weeks prior<br>challenge | 0.03 (0.01,<br>0.11)                           | 0.12 (0.05,<br>0.26)                                        | 0.06 (0.02,<br>0.14)                                 | 0.14 (0.06,<br>0.33)                                              | 0.1 (NA)                                                | 0.08 (0.03,<br>0.19)                                                 |
| log PsVNA<br>ID80 day<br>challenge              | 0.05 (0.02,<br>0.12)                           | 0.16 (0.09,<br>0.31)                                        | 0.09 (0.04,<br>0.19)                                 | 0.2 (0.1,<br>0.41)                                                | 0.07 (NA)                                               | 0.11 (0.05,<br>0.26)                                                 |

*Note:*

NA is indicated when there is only 1 negative signal and so a 95% CI can not be calculated.
