# Supplementary material for: Humoral Immune Correlates Analysis of Four Vaccines Against SARS-CoV-2 in Rhesus Macaques
Source: Research Square preprint supplement (doi:10.21203/rs.3.rs-9404931/v1), 2026-04-30
Supplement: Supplementary file 9 [file a419b44fcb17863536368536.docx]

SAP Report for: Assessing Correlates of Protection in Rhesus Macaques Administered Various Vaccine Candidates Designed to Protect Against SARS-CoV-2 Infection

Allyson Mateja, Michael Fay

May 27, 2025

Contents

[Summary 1](#_Toc139630290)

[Introduction: Study Design and Variables of Interest 2](#_Toc139630291)

[Overall Association between Virus Specific Antibody and Viral Load (Section 6.2) 3](#_Toc139630292)

[Dose Response of Vaccine Product on Virus Specific Antibody (Section 6.3) 4](#_Toc139630293)

[Dose Response of Vaccine Product on Post Challenge Viral Load (Section 6.3) 6](#_Toc139630294)

[Prediction of Post-Challenge Outcome with Single Immune Correlate (Section 6.4) 8](#_Toc139630295)

[Percent of Variance Explained by Immune Correlates (Section 6.5) 9](#_Toc139630296)

[Percent of Variance Explained by Vaccine Type and Immune Correlates (Section 6.6) 10](#_Toc139630297)

[Possible Future Work: Studying Two Immune Correlates at Once (Section 6.7) 11](#_Toc139630298)

[Cross Validation Prediction Using Vaccine Product (Section 6.8) 12](#_Toc139630299)

[Possible Future Work: Comparison with the Human Correlates Studies (Section 6.9) 13](#_Toc139630300)

[Possible Future Work: Machine Learning Approach (Section 6.10) 13](#_Toc139630301)

# Summary

The focus of this report is predicting viral response to SARS-CoV-2 challenge in nonhuman primates (NHPs) immunized with one of 4 vaccine types or placebo using antigen-specific antibody measurements. The study design included a range of doses for each vaccine type to provide a range of antibody measurements for each vaccine. We examined 8 different antibody measurements and 12 different viral load measurements explored in statistical models for each combination. Many of the antibody measurements predicted viral load well and the best fit of the 96 models had the presentation of antibodies as log-transformed MN50 values as determined by microneutralization assay (MN) on the day of challenge and predicted the viral load in BAL measured repeatedly using RT-qPCR of Nucleocapsid Gene Segment N1 and summarized using area under the curve (AUC). The model fit and 95% confidence region for that model is shown graphically in Figure 6.4.2. All models using only a single type of antibody measurement (i.e., one of the 8 different types of antibody measurements) only predicted at least 50% of the variability of the viral load measurement compared to the models that included vaccine type and dose in addition to the single antibody measurement. For the same viral load/antibody combination referenced above, the model with only antibody explained 98.2% (95% CI: 96.63%, 100%) of the variance compared to a model that additionally allowed different linear dose effects for each vaccine. To mimic how the antibody might be used as a correlate of protection, for each vaccine type we considered using the other 3 vaccine types to build a prediction model for viral load for NHPs given that vaccine, and see how well that prediction model agrees with the actual viral load measured in the NHPs immunized with that specific vaccine. For viral load/antibody combination depicted in Figure 6.4.2 the concordance between the model and the observed viral load showed moderate agreement. The concordance was between 0.25 and 0.59 for the 4 analyses, with 3 of the vaccine types having concordance significantly greater than 0 (i.e., greater than chance). The analyses for this report used over 96 viral load/antibody combinations without making statistical multiplicity corrections and thus should be considered exploratory. Among the other 95 combinations similar results were often seen with only slightly worse prediction. Overall, this study adds to the evidence that antibody measurements can be strong and useful predictors of the protective response to SARS-CoV-2 challenge.

# Introduction: Study Design and Variables of Interest

This report provides the prespecified analyses as detailed in the Statistical Analysis Plan (SAP) Version 2, March 3, 2022. The sections of the main body of this report are labeled with the Section numbers as in the SAP. Full detailed results for those sections of the SAP including figures and tables are provided in separate files. For example, a Figure or Table labeled 6.3.2 will be found in the file CoP_SAP_6.3_Final.pdf.

The details of the study are in the protocol. Briefly, this is a study of nonhuman primates (NHPs) (n=126, 63 rhesus macaques of each sex, all ≥2.5 years of age and ≥2.5 kg at initial vaccination) that were randomized to either one of 4 COVID-19 vaccine groups (Moderna, Janssen, Novavax, Sanofi) or a control group (see protocol Table 1). Within each vaccine group, animals were randomized to one of 5 or 6 dose levels. The Janssen vaccine had single dose regimens and two dose regimens, while the other vaccines all had only two dose regimens. All two dose regimens were scheduled so that the second dose was 28 days before challenge while the single dose of the Janssen vaccine was 42 days before challenge (see protocol Table 3). Logistically, the animals were challenged on 8 different days (see protocol Table 2). The NHPs were challenged with SARS-CoV-2 via the intratracheal (IT) (0.5 mL) and intranasal (IN) (0.25 mL per nostril) routes with a target dose of 1.0 X 106 TCID50. After challenge the schedule of measurements for virus specific antibody levels and viral load was the same for all animals.

This report will focus on 4 virus specific antibody (Ab) assay readouts,

- MN: Live virus Microneutralization assay
- MSD ECL: Meso scale discovery electrochemiluminescence immunoassay
- PsVNA ID50: Pseudovirus neutralizing assay, 50% inhibitory dose
- PsVNA ID80: Pseudovirus neutralizing assay, 80% inhibitory dose

at each of two measurement times: 2 weeks prior to challenge and the day of, but prior to, challenge. There are therefore 8 different ways of measuring virus specific antibody, which in this document, will be referred to as the 8 “antibody measurements”.

For the viral load measurements post challenge, we focused on 12 measurements: all combinations of three collection location/methods,

- Nasal Swab: nasopharyngeal swab
- OP Swab: oropharyngeal swab
- BAL: bronchioalveolar lavage

two time-summarization methods,

- Day 2 post challenge
- AUC: area under the curve, calculated from log10 transformed viral load measurement on Day 2, 4, 7, and 9 post challenge using the trapezoid rule with Day 0 values imputed from Study Day -14, and (untransformed) values below the limit of detection (LOD) set to LOD/2.

and two viral load measurement methods (all done using log10 transformations),

- N1: RT-qPCR of Nucleocapsid Gene Segment N1
- Subgenomic: RT-qPCR of the Small Envelope Protein (E) Gene Subgenomic RNA

In this summary “significant” refers to 95% confidence intervals excluding the null value of the parameter, which implies for regular hypotheses that the two-sided p-values are less than or equal to 0.05 (p-values are usually not explicitly calculated).

# Overall Association between Virus Specific Antibody and Viral Load (Section 6.2)

The 8 antibody measurements (4 ways of measuring the virus specific antibody at 2 different collection times) were all highly correlated within each of the 4 vaccines (Figures 6.2.2 – 6.2.5). When we combined all arms, there were large positive Spearman correlation (around 0.9) between the different ways of measuring virus specific antibody (Table 6.2.1).

We then considered the correlation between the 8 antibody measurements with 12 post-challenge viral load measurements. Graphically, this was done for each of the 4 vaccines (Figures 6.2.7-6.2.10). We measured the overall (i.e., combining all the arms) association between virus specific antibodies and viral load post-challenge in two ways. One way was to measure the Spearman correlations (i.e., the rank correlations) between each of the 8 ways of measuring the virus specific antibody with each of the 12 ways of measuring the viral load (see Table 6.2.2). As expected, the Spearman correlations were negative and substantially (i.e., < -0.3) and significantly different from zero. At Day 2 post challenge, the OP swabs had the least extreme correlations (Spearman correlations ranging from -0.49 to -0.35), the BAL was next (Spearman correlations ranging from -0.57 to -0.47), and the Nasal swabs had the most extreme (Spearman correlations ranging from -0.72 to -0.64). For the AUC measurement, which captures the effect over the period from Day 0 to 9 post challenge, the Spearman correlations were more similar between the collection locations, with ranges: (-0.72 to -0.55) for OP swab, (-0.71 to -0.50) for BAL, and (-0.74 to -0.63) for Nasal swab.

A second way to measure overall association between virus specific antibodies and viral load post-challenge is using geometric mean ratios:

where the detectable virus is measured at Day 2 post challenge in 6 ways (each of the 3 collection location/methods at each of the 2 viral load measurement methods), and using each of the 8 virus specific antibody assay time/methods. Table 6.2.3 shows the ratios were significantly less than 1, ranging from 0.02 to 0.27. Generally, we observed slightly more extreme (i.e., lower) values using virus specific antibody measurements 2 weeks prior to challenge compared to measurements on the day of challenge. Further, the N1 viral load measurements were slightly more extreme (i.e., lower) than their corresponding subgenomic measurements.

# Dose Response of Vaccine Product on Virus Specific Antibody (Section 6.3)

The dose score is a way to plot the responses to each of the different dose arms within (or between) vaccines on the same plot. All vaccines had two scheduled immunizations for each dose arm with each immunization having the same dose. The exception was Janssen, which also had four arms with a single immunization. Within each vaccine with two scheduled immunizations, if D is the dose for the arm and Dmin is the minimum dose among all arms for that vaccine, then the dose score is

,

so that the minimum dose has a dose score of 1, a dose score of 2 represents a dose that is 10 times the minimum dose, and a value of 3 is 100 times the minimum dose, etc.. The control is set to 0. Because the Janssen had some arms with one immunization and some with two immunizations, we considered three different methods to quantify the Janssen dose score:

- Janssen(s=1/2) means that each single immunization arm has its dose halved before scoring.
- Janssen(actual) means that single immunization arms and double immunization arms have the same dose scores if the dose of each immunization is the same.
- Janssen(2 dose) means that the single immunization arms are ignored and only the 2 dose immunization arms are included. Then the doses are scored analogously to the other vaccines.

We graph the different dose scores below. Because for the Janssen vaccine the minimum dose changes between the three methods, the Janssen arms with two immunizations will have different dose scores depending on the method (these scores are connected with dotted lines in the graph). For this summary, we focus on the overall scores using Janssen(s=1/2) (the single dose halved dose score) when summarizing results.

Figure 1: Dose scores for each vaccine.

First, we combined all 4 vaccines and the controls and calculated the overall Spearman correlation between the dose score and each of the 8 ways of measuring the virus specific antibody, for each of the 3 ways of calculating the Janssen dose scores. The resulting 24 Spearman correlations in Table 6.3.2 were all between 0.61 and 0.72. When we calculated the Spearman correlations separately for each vaccine (ignoring the placebo arm), there were different interpretations for each vaccine (see Table 6.3.1, and Figures 6.3.1-6.3.8). The Moderna vaccine showed substantial and significant association with the dose and the 8 ways of measuring virus specific antibody (Spearman correlations all significant, ranging from 0.74 to 0.86). The Janssen vaccine with the single dose halved showed less extreme correlation, but it was still significant for all 8 ways (Spearman correlations all significant, ranging from 0.46 to 0.74). See Table 6.3.1 for the other 2 ways of scoring the dose for the Janssen vaccine. The Sanofi vaccine had only 3 out of 8 significant, with all 8 correlation estimates positive (range: 0.15 to 0.60). The Novavax vaccine had no significant correlations, but all estimates positive (range: 0.17 to 0.34). It is difficult to compare dose effects on viral load across vaccines because of differences between the vaccine platforms, their minimum doses, and their range of doses. Thus, we do not expect the correlations to be similar for the different vaccines.

# Dose Response Effects of Vaccine Product on Post Challenge Viral Load (Section 6.3)

Next, we compared the dose scores to the different ways of measuring viral load. Overall, there were substantial and significant negative Spearman correlations with each of the 12 ways of measuring the viral load and the 3 ways of scoring the Janssen doses (Table 6.3.4). The 36 Spearman correlations in Table 6.3.4 were all between -0.57 and -0.24. When we calculated the Spearman correlations separately for each vaccine (ignoring the placebo arm), there were few significant correlations (Table 6.3.3, see also Figures 6.3.9-6.3.20). Only the Moderna and the Janssen (single dose halved) had any significant Spearman correlations. Further, the Moderna vaccine was significant only for the 4 Nasal swab viral load measurements, and the Janssen vaccine (single dose halved) was only significant for the 2 Nasal swab on Day 2 post-challenge. Since the vaccines vary in platforms, the dose scores relationship with viral load were not expected to be similar because each vaccine has a different minimum dose and dose spread.

We considered linear generalized estimating equation (GEE) models to compare the dose scores to each of the 12 ways to measure viral load. These models allow a different effect for each vaccine by estimating a different adjustment factor for each vaccine’s dose score. Of the 3 ways to define the dose scores for the Janssen study, we focused on Janssen(s=1/2), which was single dose halved dose score. For that case only, we include plots of the model on top of the raw data to help explain the fits. We performed linear models on the log10 viral load, except the AUC measurements which did not need to be log10 transformed, since they were calculated by using the log10 transformed viral loads at each time point.

We discuss the model for the Janssen(s=1/2) analysis on the AUC for the BAL N1 (Table 6.3.17, Figure 6.3.21). The model for each vaccine had the expected AUC value equal to the intercept plus a factor (unique for each vaccine) times the dose score,

VaccFactor * (Dose Score).

Thus, the Intercept represents the expected AUC for the placebo arm, and the Intercept plus the VaccFactor represents the expected AUC for the minimum dose for that vaccine. We reproduce Table 6.3.17 here:

Table 6.3.17: Vaccine Linear GEE Model Results for AUC BAL.N1

|  | Estimate | Lower | Upper | p |
| --- | --- | --- | --- | --- |
| Intercept | 38.23 | 35.40 | 41.06 | <0.001 |
| Janssen dose score* | -4.28 | -6.33 | -2.23 | 0.002 |
| Moderna dose score | -2.33 | -5.43 | 0.77 | 0.114 |
| Novavax dose score | -5.37 | -7.60 | -3.13 | 0.002 |
| Sanofi dose score | -4.13 | -6.12 | -2.14 | 0.002 |

*Single Dose Halved Dose Score

For this model, the expected AUC was: 38.23 for the control arm (Intercept) , 38.23-4.28 = 33.95 for the minimum Janssen(s=1/2) dose (2 x 109 viral particles, single dose), 38.23-2*4.28 = 29.67 for the Janssen(s=1/2) dose that is 10 times that minimum dose (2x 1010 viral particles, single dose), and the expected AUC for other dose scores and vaccine platforms were calculated similarly. Note that the Moderna dose score factor was not significantly different from zero, meaning the model for any Moderna dose was not significantly different from the placebo arm. We emphasize again that it is difficult to compare across the vaccines because the dose scales, minimum doses, and the dose ranges differ between the vaccines. Nevertheless, from Figure 6.3.21, we see that the model fit seems crude but reasonable.

Over the 12 different viral load analyses (see Table 6.3.17-6.3.28, Figures 6.3.21-6.3.32), we summarize the important points.

1. Although the estimates changed within a location when changing between N1 and subgenomic measurements, the significance levels did not change much. This is consistent with a shifting and rescaling of the measurement.
2. The day 2 post challenge OP swab analyses did not show significant effects for most of the vaccines. This could be due to the large variability in the placebo responses, or the lack of fit of the Janssen two dose data, which may increase the variance estimates for the whole model (see Figures 6.3.29 and 6.3.30).
3. In general, the AUC values showed more significant vaccine effects than the associated day 2 values. This may be due to the AUC measurements being derived from multiple measurements per individual which provides more information about the course of infection, as compared to a single timepoint. That extra information may have decreased the variability of the AUC values leading to more significant effects.
4. In a few cases the vaccine responses did not appear to decrease with increasing dose and the fit appears poor:
   1. for Novavax see Figures 6.3.23 (AUC Nasal swab N1), 6.3.31 and 6.3.32 (day 2 post challenge, nasal swab)
   2. for Janssen two dose, see Figure 6.3.29, 6.3.30 (day 2 post challenge OP swab).

We additionally had methods for associating the dose with binary viral responses (positive [i.e., detectable]/negative [i.e., undetectable] response). This was put into the SAP in case using the binary responses simplified or better clarified the results. In general, the binary response analyses did not add much useful information compared to the continuous viral responses. For example, rank tests (specifically, Wilcoxon-Mann-Whitney tests) when applied within vaccine type, were generally not able to detect differences in doses between the positive and negative viral load groups (Table 6.3.41), but in some cases were able to detect overall responses (Table 6.3.42). The logistic GEE models picked up fewer significant vaccine effects than the linear GEE models, likely because there were few negative responses (see Tables 6.3.43-6.3.51).

# Prediction of Post-Challenge Outcome with Single Immune Correlate (Section 6.4)

In this section, we predict post-challenge outcome on the data where all vaccines are included and with each of the 8 ways of measuring viral load using each of the 12 ways of measuring antibodies. We considered models based on either numeric viral load or the binary viral load (i.e., the dichotomizing the viral load based on detectability into positive or negative responses), but the binary models were not particularly illuminating, so we summarize here only the numeric viral load models. Because we did not know the shape of the curves ahead of time, we used cross validation to select among several types of models (linear, exponential, segmented line regression, natural cubic splines, and 4 parameter logistic). Of the 96 combinations (8 viral load x 12 antibody measurement), in 82 pairs the best model fit was a linear model, and in the other 14 pairs the best model fit was an exponential model. Thus, the simple models were selected in an objective manner. In Table 6.4.1 we give the results of the 96 pairs, sorted by the adjusted R-squared value, with the best fits first. The 96 best fit models are plotted in Figures 6.4.1-6.4.96. The strongest signal (i.e., best fit) was using the antibodies as log MN on the day of challenge to predict the viral load as AUC BAL N1 (see Figure 6.4.2, below) in an exponential model. That plot depicts the predicted viral load with the associated 95% confidence intervals for each point.


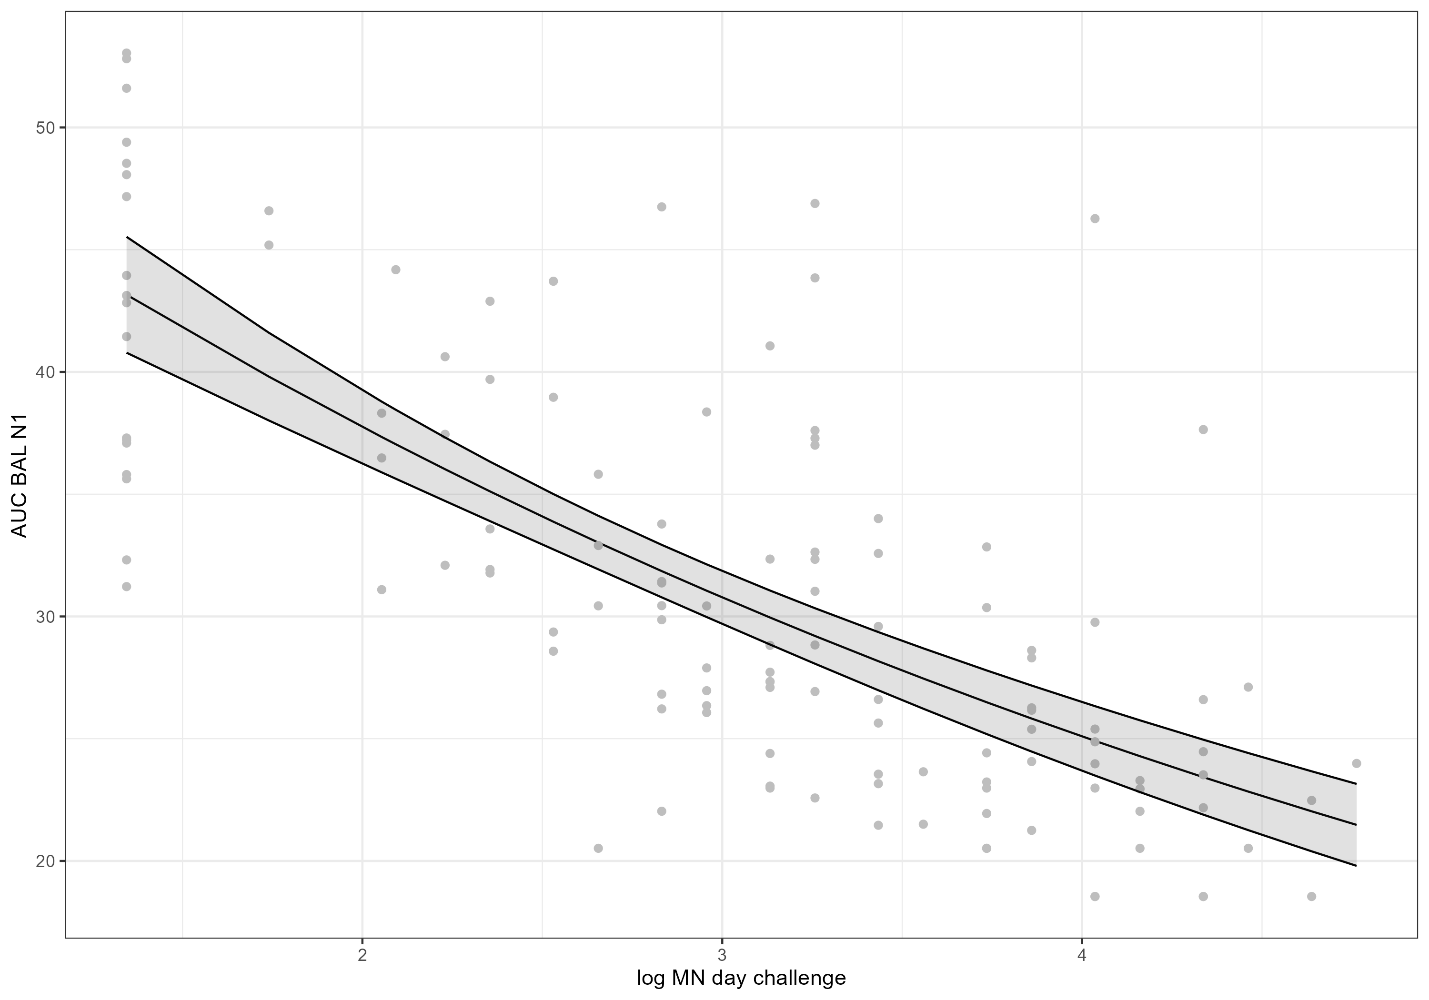


Figure 6.4.2: Best model fit, using MN antibodies on the day of challenge to predict AUC BAL N1

We stress that there were 96 combinations explored, and because of randomness (e.g., biological variability, assay variability, etc.) the strongest signal from these data may not necessarily be the strongest signal from future experiments. In other words, the best fit has not been shown statistically to be the best. This means that other models with good fit may be chosen based on other factors besides fit (e.g., one of the 8 antibody measurements may have been more useful than some of the others in human studies, and that information may be taken into account).

# Percent of Variance Explained by Immune Correlates (Section 6.5)

For this section and the next, we explore if the model for each antibody measurement predicts each viral load as well as the model that additionally includes other predictors such as dose and possibly vaccine type. One measure of how well a model fits is the R-squared value, which ranges from 0 to 1, with one being a perfect fit. An issue with using R-squared for comparing models is that adding more variables will increase the R-squared value even if the added variables represent noise. So instead of comparing the R-squared values for two models, we compared the two models using adjusted R-squared values. The adjusted R-squared value makes an adjustment for the number of variables added to a model, so that if the extra variables in a model represent noise without any signal, they will not increase its adjusted R-squared value on average. We define the percent of variance explained (PVE) as 100 times the ratio of two adjusted R-squared values, with the PVE capped at 100% (i.e., if the ratio is greater than 1, we set it to 1). A PVE of 100% indicates that the model with fewer variables is as good or better at predicting as the model with more variables. Symbolically, we write the PVE as

where represents the adjusted R-squared for the reference model (e.g., the model that only includes the antibody measurement for prediction), and represents the adjusted R-squared for the model that additionally adds some extra variables (e.g., dose scores). The terminology “percent variance explained” refers to the variance explained by the reference model compared to the more complicated one. For example, PVE=100% means that the simpler reference model explains all the variance that the more complicated model does. Confidence intervals for the PVE estimates are calculated using non-parametric bootstrap.

Because there were 8 ways of measured antibody and 12 ways of measured viral load, each analysis will be repeated 8 x 12=96 times, once for each antibody/viral-load combination.

We first considered predicting the numeric viral load, using the percent of variance explained with the reference model derived from Section 6.4, and the extra variables were the dose scores with a different parameter for each unique score. Table 6.5.1 gives the results. In general, the PVE estimates were large, ranging from 39% to 100%, with most (52/96=54%) of the 96 PVE estimated over 80%. All the PVE estimates below 60% came from the models that measured viral load with the OP swab at day 2 post challenge. From Section 6.4, the best fit model for predicting the viral load from antibody measurement alone was predicting AUC BAL N1 using log MN day of challenge, with the PVE of 93.85% (95% CI: 94.06%, 100%). The PVE is nearly 100%, so that the dose scores do not add much to the prediction model without the dose scores, implying that the antibody measurement is explaining nearly all the variance as explained by the model that additionally includes dose scores. This statistic is crude, because it is hard to define a dose score that is meaningful across all four vaccines and the placebo arm. A less crude version of PVE is given at the end of the next section.

Another troubling issue is that some of the 95% confidence intervals do not contain the estimate, as in the case mentioned above. One possibility for the cause of this strange confidence interval behavior is that the balanced design in the study perhaps produces atypical R-squared values compared to the random sample with replacement of the bootstrap, which will tend to be less balanced and more likely to be missing some dose categories. To explore that further, we redid the analyses after collapsing the dose responses into bins, so that it is less likely that a bootstrap sample will have dose categories with no selected individuals. This analysis with binning (see COPSAP6.5_6.6_Appendix.pdf, Table A6.5.1) had fewer cases with the 95% confidence interval excluding the estimate. For example, when we predicted AUC BAL N1 using log MN day of challenge, the resulting PVE is 97.6% (95% CI: 94.5%, 100%).

Because the binary viral load analyses did not add much insight, we do not discuss them here, but for completeness the results are given in Table 6.5.2 (and the binned version is in Table A6.5.2).

# Percent of Variance Explained by Vaccine Type and Immune Correlates (Section 6.6)

We next explored the percent variance explained (PVE) using the antibody measurements with dose scores from the previous section as the reference model and the extra variables using vaccine type (specifically, we allow a different parameter for each dose score/vaccine combination).

The results when treating the viral load as numeric are presented in Table 6.6.1. Except for the AUC OP swab viral load analyses, the remaining 80 of the 96 PVE estimates were all above 80%. Returning to the example where we predicted AUC BAL N1 using log MN day of challenge, the resulting PVE is 100% (95% CI: 94.76, 100%). This means that the antibody measurement and dose score explain the variability as well or better than the model adding information about vaccine type.

As in the previous section, we repeated the analysis after binning the dose scores. The results were similar to the results without the binning, except the confidence intervals were more likely to enclose the estimates. Table A6.6.1 gives those results, showing very high PVE except when viral load was measured by OP swab.

As in the previous section, we do not discuss the binary viral load analyses because they do not add much insight (see Tables 6.6.2 and A6.6.2).

Because the dose scores are crude (e.g., each vaccine’s minimum dose is arbitrarily defined as 1, and the placebo as 0, so that the difference in effect between the minimum dose and placebo is the same as the difference in effect between the minimum dose and the dose that is 10 times larger), we performed another PVE analysis that was not in the SAP. We calculated the PVE where (1) the reference models use only the antibody measurement as in Section 6.4 (specifically, using antibody as the only linear numeric effect in the linear predictor part of the generalized linear model (GLM), where the GLM is either a linear model or an exponential model depending on which fit better by cross validation), and (2) the “reference+extra” models additionally allow different linear effects for dose for each vaccine (i.e., the linear predictor part of the model adds the single dose-halved dose score as numeric as well as main effects for vaccine type and the interaction between vaccine type and the dose scores). This “reference+extra” model is different from the one described in the first paragraph of this section (which has a different parameter for each dose score/vaccine combination); the new model has fewer parameters (and hence has a smaller R-squared adjustment) and treats the dose scores as linear effects, but allows a different linear effect for each vaccine. Thus, this PVE analysis measures how well the model with just the antibody predicts viral load compared to the model that additionally has a different dose score linear effect for each vaccine type.

The results are in Table A6.6.3. For the 96 viral load/antibody combinations, the PVE estimates are all significant and substantial, ranging from 50.29% to 100% with most (54/96) viral load/antibody combinations above 80%. For the viral load/antibody model where we predicted AUC BAL N1 using log MN day of challenge, the resulting PVE was 98.2% (95% CI: 96.63%, 100%).

# Possible Future Work: Studying Two Immune Correlates at Once (Section 6.7)

The SAP includes combining two different classes of immune correlates (e.g., an antibody measurement with a T cell measurement). This type of analysis may be added in the future but is not part of the initial report.

# Cross Validation Prediction Using Vaccine Product (Section 6.8)

This section explores the robustness of the prediction of viral load by an antibody measurement by using cross validation leaving out a vaccine type. For the best models of each viral load/antibody measurement pair (see Section 6.4), we refit the model after removing data for animals given one vaccine product and use the fit of that model to predict the viral load for the excluded animals using their antibody measurements. We evaluated each cross-validation procedure using an agreement coefficient, checking the agreement between the predicted viral load with the observed viral load on the excluded animals. Agreement coefficients are scaled from -1 to 1, with 0 denoting chance agreement, and 1 denoting perfect agreement. Negative agreement coefficient values denote agreement worse than chance, and any good predictor would have a positive agreement coefficient. These agreement coefficients are like correlations, except correlations can be 1 if the prediction and the observed are linearly related but do not match exactly, but agreement coefficients are 1 only with exact matching.

Consider first the numeric viral load analyses, where the agreement coefficient is the random marginal agreement coefficient (RMAC) version of the concordance correlation coefficient, defined as CCRMAC. Of the two viral load measurement methods (N1 and subgenomic), N1 has fewer undetectable values, hence it generally provides better agreement than the subgenomic for the numeric analyses. See Tables 6.8.1-6.8.4 for the results for the 4 cross-validation procedures for each of the 12 ways of measuring viral load and 8 ways of measuring antibody. Across those 4 tables, one of the best pairs of viral-load/antibody-measurement is AUC-BAL-N1/log-MN-day-challenge, which was the best viral-load/antibody-measurement model chosen in the analyses associated with SAP Section 6.4 (Prediction of Post-Challenge Outcome with Single Immune Correlate). For that pair, there was significant agreement for Sanofi (CCRMAC = 0.59, 95% CI 0.30, 0.78), Moderna (CCRMAC = 0.44, 95% CI 0.07, 0.70), and Janssen (CCRMAC = 0.46, 95% CI 0.10, 0.72), since their 95% confidence intervals for CCRMAC exclude 0. Further , for Novavax, the concordance estimate was positive although not significant (CCRMAC = 0.25, 95% CI -0.25, 0.49).

Another way to pick the best pair is to take the average of the CCRMAC values over the 4 tables (Table 6.8.5). When that is done, the AUC-BAL-N1/log-MN-day-challenge pair has the second-best average (CCavg=0.4350), and it was surpassed only by the pair, Day-2-post-challenge-Nasal-sawb-N1/PsVNA-ID80-day-challenge which had a slightly higher average (CCavg=0.4375). For the latter pair, the agreement among the 4 vaccines was not too different than for the AUC-BAL-N1/log-MN-day-challenge pair (see Tables 6.8.1-6.8.4).

The SAP also requires pairwise analyses for the numeric viral load analyses, which uses only one vaccine product to create the prediction model and uses another vaccine product to calculate the agreement between the predicted and observed viral load. We will not discuss those pairwise analyses in this report, although the details are in Tables 6.8.5-6.8.16.

Finally, the SAP requires the binary analyses of the cross-validated agreement; however, that was included in the SAP in case those analyses gave further insight, and it does not appear that dichotomizing the response into binary values adds much value (see Tables 6.8.17-6.8.32).

# Possible Future Work: Comparison with the Human Correlates Studies (Section 6.9)

Further analyses that compare the data from the NHP study with human data may be done in the future but are not part of the initial report.

# Possible Future Work: Machine Learning Approach (Section 6.10)

Further analyses that use many more variables with machine learning may be done in the future but are not part of the initial report.
