# Supplementary material for: Humoral Immune Correlates Analysis of Four Vaccines Against SARS-CoV-2 in Rhesus Macaques
Source: Research Square preprint supplement (doi:10.21203/rs.3.rs-9404931/v1), 2026-04-30
Supplement: Supplementary file 10 [file b648aed0a321b68cefc0c01a.pdf]

# CoP SAP 6.8

Allyson Mateja

June 27, 2023

## 6.8 Cross Validation Prediction Using Vaccine Product

To explore the robustness of the prediction, a cross validation analysis using the 4 vaccine products will be explored. Specifically, a prediction model for viral load will be created using a virus-specific antibody based on data from all but one of the vaccine products (e.g., the final selected model in Section 6.4.1; for binary viral loads as in 6.4.2 logistic models are used). Then that model will be used to predict viral load in animals that got the vaccine product that was not used to build the model. We will use agreement measures to predict how well the modeled viral loads predict the observed viral load (in the animals that got the vaccine product left out of the prediction model). We will use the RMAC (random marginal agreement coefficient) versions of the concordance correlation coefficient for numeric viral load or the RMAC Cohen's Kappa coefficient for binary viral load. RMAC are the same as the usual agreement coefficients when the distribution of the predicted viral loads equal the distribution of the observed viral loads, but when those distributions differ the RMAC are slightly better because they do not imply greater agreement when those distributions disagree more (Fay, 2005). This cross validation prediction will be repeated for each vaccine product. See Fay, et al., (2012), for a similar idea predicting outcome in different species. We use a nonparametric bootstrap to perform the inferences.

These types of cross validation prediction will also be done for pairs of vaccine products. For example, build a prediction model using data from Vaccine A and use it to predict Vaccine B, predict using Vaccine A to predict Vaccine C, etc.

## Numeric Viral Load

Table 6.8.1: RMAC with Sanofi Vaccine Product Excluded

|                                                              | log<br>MN 2<br>weeks<br>prior<br>chal-<br>lenge | log<br>MN<br>day<br>chal-<br>lenge | log<br>MSD<br>ECL 2<br>weeks<br>prior<br>chal-<br>lenge | log<br>MSD<br>ECL<br>day<br>chal-<br>lenge | log<br>PsVNA<br>ID50 2<br>weeks<br>prior<br>chal-<br>lenge | log<br>PsVNA<br>ID50<br>day<br>chal-<br>lenge | log<br>PsVNA<br>ID80 2<br>weeks<br>prior<br>chal-<br>lenge | log<br>PsVNA<br>ID80<br>day<br>chal-<br>lenge |
|--------------------------------------------------------------|-------------------------------------------------|------------------------------------|---------------------------------------------------------|--------------------------------------------|------------------------------------------------------------|-----------------------------------------------|------------------------------------------------------------|-----------------------------------------------|
| AUC BAL<br>N1                                                | 0.44<br>(0.12,<br>0.7)                          | 0.59<br>(0.3,<br>0.78)             | 0.18<br>(-0.05,<br>0.42)                                | 0.22<br>(-0.04,<br>0.47)                   | 0.28<br>(0.03,<br>0.52)                                    | 0.36<br>(0.12,<br>0.56)                       | 0.32<br>(0.05,<br>0.53)                                    | 0.37<br>(0.08,<br>0.63)                       |
| AUC BAL<br>Subgenomic                                        | 0.3<br>(-0.06,<br>0.57)                         | 0.48<br>(0.12,<br>0.71)            | 0.14<br>(-0.11,<br>0.35)                                | 0.18<br>(-0.09,<br>0.4)                    | 0.18<br>(-0.07,<br>0.36)                                   | 0.19<br>(-0.05,<br>0.38)                      | 0.21<br>(-0.07,<br>0.43)                                   | 0.24<br>(-0.05,<br>0.46)                      |
| AUC Nasal<br>Swab N1                                         | 0.52<br>(0.18,<br>0.74)                         | 0.6<br>(0.34,<br>0.75)             | 0.34<br>(-0.07,<br>0.62)                                | 0.39<br>(0.02,<br>0.64)                    | 0.53<br>(0.2,<br>0.73)                                     | 0.46<br>(0.03,<br>0.74)                       | 0.47<br>(0.16,<br>0.68)                                    | 0.59<br>(0.26,<br>0.79)                       |
| AUC Nasal<br>Swab<br>Subgenomic                              | 0.42<br>(0.06,<br>0.72)                         | 0.54<br>(0.26,<br>0.76)            | 0.18<br>(-0.16,<br>0.52)                                | 0.22<br>(-0.13,<br>0.54)                   | 0.39<br>(0.08,<br>0.69)                                    | 0.37<br>(-0.02,<br>0.69)                      | 0.35<br>(0.04,<br>0.63)                                    | 0.44<br>(0.1,<br>0.73)                        |
| AUC OP<br>Swab N1                                            | 0.2<br>(0.02,<br>0.55)                          | 0.15<br>(-0.08,<br>0.59)           | 0.13<br>(-0.04,<br>0.45)                                | 0.15<br>(-0.03,<br>0.46)                   | 0.2<br>(0.03,<br>0.49)                                     | 0.11<br>(-0.13,<br>0.58)                      | 0.17<br>(0, 0.5)                                           | 0.22<br>(0.03,<br>0.55)                       |
| AUC OP<br>Swab<br>Subgenomic                                 | 0.08<br>(-0.05,<br>0.5)                         | 0.03<br>(-0.12,<br>0.55)           | 0.03<br>(-0.09,<br>0.37)                                | 0.05<br>(-0.08,<br>0.42)                   | 0.09<br>(-0.04,<br>0.45)                                   | 0<br>(-0.15,<br>0.53)                         | 0.06<br>(-0.06,<br>0.48)                                   | 0.09<br>(-0.05,<br>0.5)                       |
| log VL Day2<br>PostChal-<br>lenge BAL<br>N1                  | 0.19<br>(-0.23,<br>0.49)                        | 0.31<br>(-0.02,<br>0.51)           | -0.05<br>(-0.36,<br>0.17)                               | -0.02<br>(-0.32,<br>0.2)                   | 0.15<br>(-0.21,<br>0.4)                                    | 0.07<br>(-0.29,<br>0.34)                      | 0.11<br>(-0.22,<br>0.36)                                   | 0.19<br>(-0.22,<br>0.46)                      |
| log VL Day2<br>PostChal-<br>lenge BAL<br>Subgenomic          | 0.22<br>(-0.13,<br>0.47)                        | 0.29<br>(0.01,<br>0.49)            | 0.04<br>(-0.24,<br>0.24)                                | 0.06<br>(-0.22,<br>0.27)                   | 0.16<br>(-0.14,<br>0.38)                                   | 0.11<br>(-0.21,<br>0.35)                      | 0.16<br>(-0.13,<br>0.37)                                   | 0.19<br>(-0.12,<br>0.41)                      |
| log VL Day2<br>PostChal-<br>lenge<br>OPswab N1               | 0.3<br>(-0.06,<br>0.5)                          | 0.09<br>(-0.21,<br>0.27)           | 0.02<br>(-0.35,<br>0.2)                                 | 0.06<br>(-0.29,<br>0.23)                   | 0.13<br>(-0.17,<br>0.3)                                    | 0.11<br>(-0.23,<br>0.33)                      | 0.17<br>(-0.17,<br>0.34)                                   | 0.19<br>(-0.12,<br>0.37)                      |
| log VL Day2<br>PostChal-<br>lenge<br>OPswab<br>Subgenomic    | 0.33<br>(-0.02,<br>0.53)                        | 0.14<br>(-0.18,<br>0.37)           | 0.08<br>(-0.28,<br>0.29)                                | 0.12<br>(-0.23,<br>0.31)                   | 0.19<br>(-0.14,<br>0.38)                                   | 0.21<br>(-0.18,<br>0.46)                      | 0.21<br>(-0.11,<br>0.4)                                    | 0.24<br>(-0.09,<br>0.44)                      |
| log VL Day2<br>PostChal-<br>lenge<br>NasalSwab<br>N1         | 0.43<br>(0.04,<br>0.67)                         | 0.46<br>(0.13,<br>0.64)            | 0.13<br>(-0.27,<br>0.41)                                | 0.19<br>(-0.18,<br>0.44)                   | 0.4<br>(0.02,<br>0.65)                                     | 0.28<br>(-0.1,<br>0.56)                       | 0.32<br>(-0.03,<br>0.59)                                   | 0.49<br>(0.12,<br>0.71)                       |
| log VL Day2<br>PostChal-<br>lenge<br>NasalSwab<br>Subgenomic | 0.4<br>(-0.01,<br>0.66)                         | 0.42<br>(0.06,<br>0.6)             | 0.06<br>(-0.36,<br>0.32)                                | 0.12<br>(-0.28,<br>0.38)                   | 0.35<br>(-0.07,<br>0.59)                                   | 0.23<br>(-0.18,<br>0.51)                      | 0.27<br>(-0.08,<br>0.53)                                   | 0.44<br>(0.02,<br>0.67)                       |

Table 6.8.2: RMAC with Moderna Vaccine Product Excluded

|                                                              | log<br>MN 2<br>weeks<br>prior<br>chal-<br>lenge | log<br>MN<br>day<br>chal-<br>lenge | log<br>MSD<br>ECL 2<br>weeks<br>prior<br>chal-<br>lenge | log<br>MSD<br>ECL<br>day<br>chal-<br>lenge | log<br>PsVNA<br>ID50 2<br>weeks<br>prior<br>chal-<br>lenge | log<br>PsVNA<br>ID50<br>day<br>chal-<br>lenge | log<br>PsVNA<br>ID80 2<br>weeks<br>prior<br>chal-<br>lenge | log<br>PsVNA<br>ID80<br>day<br>chal-<br>lenge |
|--------------------------------------------------------------|-------------------------------------------------|------------------------------------|---------------------------------------------------------|--------------------------------------------|------------------------------------------------------------|-----------------------------------------------|------------------------------------------------------------|-----------------------------------------------|
| AUC BAL<br>N1                                                | 0.21<br>(-0.13,<br>0.48)                        | 0.44<br>(0.07,<br>0.7)             | 0.27<br>(-0.01,<br>0.52)                                | 0.41<br>(0.08,<br>0.67)                    | 0.16<br>(-0.13,<br>0.39)                                   | 0.1<br>(-0.18,<br>0.33)                       | 0.17<br>(-0.11,<br>0.4)                                    | 0.2<br>(-0.11,<br>0.44)                       |
| AUC BAL<br>Subgenomic                                        | 0.15<br>(-0.11,<br>0.37)                        | 0.32<br>(0.02,<br>0.53)            | 0.18<br>(-0.04,<br>0.38)                                | 0.32<br>(0.05,<br>0.53)                    | 0.08<br>(-0.14,<br>0.25)                                   | 0.03<br>(-0.18,<br>0.2)                       | 0.1<br>(-0.11,<br>0.28)                                    | 0.11<br>(-0.12,<br>0.29)                      |
| AUC Nasal<br>Swab N1                                         | 0.33<br>(-0.03,<br>0.57)                        | 0.28<br>(-0.06,<br>0.52)           | 0.46<br>(0.11,<br>0.67)                                 | 0.62<br>(0.31,<br>0.79)                    | 0.16<br>(-0.14,<br>0.36)                                   | 0.18<br>(-0.13,<br>0.4)                       | 0.22<br>(-0.07,<br>0.43)                                   | 0.32<br>(0.03,<br>0.51)                       |
| AUC Nasal<br>Swab<br>Subgenomic                              | 0.46<br>(0.15,<br>0.69)                         | 0.4<br>(0.1,<br>0.61)              | 0.52<br>(0.24,<br>0.72)                                 | 0.61<br>(0.37,<br>0.77)                    | 0.34<br>(0.08,<br>0.5)                                     | 0.26<br>(-0.03,<br>0.46)                      | 0.4<br>(0.12,<br>0.57)                                     | 0.43<br>(0.16,<br>0.59)                       |
| AUC OP<br>Swab N1                                            | 0.4<br>(0.05,<br>0.65)                          | 0.41<br>(0.06,<br>0.66)            | 0.54<br>(0.17,<br>0.77)                                 | 0.63<br>(0.3,<br>0.83)                     | 0.39<br>(0.04,<br>0.61)                                    | 0.24<br>(-0.15,<br>0.54)                      | 0.39<br>(0.06,<br>0.63)                                    | 0.44<br>(0.07,<br>0.69)                       |
| AUC OP<br>Swab<br>Subgenomic                                 | 0.28<br>(-0.04,<br>0.52)                        | 0.22<br>(-0.09,<br>0.45)           | 0.37<br>(0.01,<br>0.62)                                 | 0.48<br>(0.11,<br>0.72)                    | 0.27<br>(-0.04,<br>0.52)                                   | 0.09<br>(-0.25,<br>0.39)                      | 0.26<br>(-0.06,<br>0.52)                                   | 0.27<br>(-0.09,<br>0.55)                      |
| log VL Day2<br>PostChal-<br>lenge BAL<br>N1                  | 0.22<br>(-0.17,<br>0.46)                        | 0.42<br>(0.04,<br>0.64)            | 0.27<br>(-0.12,<br>0.51)                                | 0.34<br>(-0.12,<br>0.65)                   | 0.27<br>(0,<br>0.45)                                       | 0.18<br>(-0.08,<br>0.34)                      | 0.26<br>(-0.01,<br>0.43)                                   | 0.25<br>(-0.04,<br>0.44)                      |
| log VL Day2<br>PostChal-<br>lenge BAL<br>Subgenomic          | 0.3<br>(-0.07,<br>0.54)                         | 0.45<br>(0.1,<br>0.67)             | 0.34<br>(-0.01,<br>0.57)                                | 0.43<br>(-0.01,<br>0.72)                   | 0.34<br>(0.08,<br>0.52)                                    | 0.24<br>(-0.04,<br>0.41)                      | 0.33<br>(0.05,<br>0.51)                                    | 0.32<br>(0.03,<br>0.51)                       |
| log VL Day2<br>PostChal-<br>lenge<br>OPswab N1               | 0.04<br>(-0.35,<br>0.35)                        | -0.03<br>(-0.39,<br>0.25)          | 0.06<br>(-0.37,<br>0.44)                                | 0.07<br>(-0.41,<br>0.5)                    | -0.02<br>(-0.38,<br>0.3)                                   | 0.01<br>(-0.27,<br>0.23)                      | -0.01<br>(-0.36,<br>0.29)                                  | 0.05<br>(-0.3,<br>0.35)                       |
| log VL Day2<br>PostChal-<br>lenge<br>OPswab<br>Subgenomic    | 0.21<br>(-0.18,<br>0.49)                        | 0.14<br>(-0.25,<br>0.4)            | 0.2<br>(-0.23,<br>0.51)                                 | 0.21<br>(-0.23,<br>0.58)                   | 0.13<br>(-0.25,<br>0.42)                                   | 0.18<br>(-0.15,<br>0.41)                      | 0.15<br>(-0.24,<br>0.43)                                   | 0.22<br>(-0.15,<br>0.48)                      |
| log VL Day2<br>PostChal-<br>lenge<br>NasalSwab<br>N1         | 0.66<br>(0.34,<br>0.84)                         | 0.62<br>(0.35,<br>0.78)            | 0.72<br>(0.49,<br>0.84)                                 | 0.61<br>(0.38,<br>0.76)                    | 0.6<br>(0.33,<br>0.78)                                     | 0.54<br>(0.25,<br>0.72)                       | 0.65<br>(0.36,<br>0.82)                                    | 0.62<br>(0.32,<br>0.81)                       |
| log VL Day2<br>PostChal-<br>lenge<br>NasalSwab<br>Subgenomic | 0.57<br>(0.28,<br>0.77)                         | 0.5<br>(0.18,<br>0.71)             | 0.6<br>(0.36,<br>0.76)                                  | 0.51<br>(0.23,<br>0.69)                    | 0.46<br>(0.13,<br>0.71)                                    | 0.46<br>(0.11,<br>0.69)                       | 0.52<br>(0.24,<br>0.74)                                    | 0.47<br>(0.11,<br>0.74)                       |

Table 6.8.3: RMAC with Janssen Vaccine Product Excluded

|                                                              | log<br>MN 2<br>weeks<br>prior<br>chal-<br>lenge | log<br>MN<br>day<br>chal-<br>lenge | log<br>MSD<br>ECL 2<br>weeks<br>prior<br>chal-<br>lenge | log<br>MSD<br>ECL<br>day<br>chal-<br>lenge | log<br>PsVNA<br>ID50 2<br>weeks<br>prior<br>chal-<br>lenge | log<br>PsVNA<br>ID50<br>day<br>chal-<br>lenge | log<br>PsVNA<br>ID80 2<br>weeks<br>prior<br>chal-<br>lenge | log<br>PsVNA<br>ID80<br>day<br>chal-<br>lenge |
|--------------------------------------------------------------|-------------------------------------------------|------------------------------------|---------------------------------------------------------|--------------------------------------------|------------------------------------------------------------|-----------------------------------------------|------------------------------------------------------------|-----------------------------------------------|
| AUC BAL<br>N1                                                | 0.22<br>(-0.21,<br>0.57)                        | 0.46<br>(0.1,<br>0.72)             | -0.06<br>(-0.42,<br>0.38)                               | 0.16<br>(-0.22,<br>0.53)                   | -0.05<br>(-0.36,<br>0.21)                                  | 0.01<br>(-0.32,<br>0.3)                       | 0.05<br>(-0.3,<br>0.35)                                    | 0.17<br>(-0.2,<br>0.49)                       |
| AUC BAL<br>Subgenomic                                        | 0.15<br>(-0.22,<br>0.45)                        | 0.31<br>(-0.06,<br>0.59)           | -0.13<br>(-0.45,<br>0.26)                               | 0.09<br>(-0.28,<br>0.42)                   | -0.06<br>(-0.37,<br>0.21)                                  | -0.04<br>(-0.35,<br>0.21)                     | 0.02<br>(-0.35,<br>0.33)                                   | 0.09<br>(-0.29,<br>0.4)                       |
| AUC Nasal<br>Swab N1                                         | 0.12<br>(-0.25,<br>0.46)                        | 0.14<br>(-0.31,<br>0.53)           | -0.03<br>(-0.35,<br>0.26)                               | 0.11<br>(-0.22,<br>0.38)                   | -0.14<br>(-0.44,<br>0.14)                                  | -0.1<br>(-0.45,<br>0.24)                      | -0.03<br>(-0.39,<br>0.29)                                  | 0.08<br>(-0.31,<br>0.44)                      |
| AUC Nasal<br>Swab<br>Subgenomic                              | 0.28<br>(-0.1,<br>0.56)                         | 0.33<br>(-0.14,<br>0.68)           | 0.02<br>(-0.26,<br>0.28)                                | 0.17<br>(-0.11,<br>0.44)                   | -0.11<br>(-0.39,<br>0.15)                                  | -0.06<br>(-0.42,<br>0.27)                     | 0.04<br>(-0.29,<br>0.34)                                   | 0.2<br>(-0.22,<br>0.51)                       |
| AUC OP<br>Swab N1                                            | -0.01<br>(-0.37,<br>0.36)                       | 0.13<br>(-0.21,<br>0.48)           | -0.04<br>(-0.31,<br>0.21)                               | 0.09<br>(-0.17,<br>0.34)                   | -0.17<br>(-0.47,<br>0.07)                                  | -0.06<br>(-0.38,<br>0.19)                     | -0.05<br>(-0.39,<br>0.23)                                  | 0.1<br>(-0.26,<br>0.41)                       |
| AUC OP<br>Swab<br>Subgenomic                                 | 0.01<br>(-0.29,<br>0.31)                        | 0.13<br>(-0.23,<br>0.44)           | -0.1<br>(-0.34,<br>0.15)                                | 0.06<br>(-0.21,<br>0.3)                    | -0.24<br>(-0.53,<br>0.03)                                  | -0.21<br>(-0.49,<br>0.06)                     | -0.1<br>(-0.41,<br>0.17)                                   | -0.04<br>(-0.38,<br>0.27)                     |
| log VL Day2<br>PostChal-<br>lenge BAL<br>N1                  | 0.15<br>(-0.16,<br>0.38)                        | 0.24<br>(-0.07,<br>0.46)           | 0.01<br>(-0.29,<br>0.23)                                | 0.07<br>(-0.19,<br>0.23)                   | 0.12<br>(-0.12,<br>0.31)                                   | 0.11<br>(-0.11,<br>0.27)                      | 0.14<br>(-0.14,<br>0.36)                                   | 0.14<br>(-0.14,<br>0.35)                      |
| log VL Day2<br>PostChal-<br>lenge BAL<br>Subgenomic          | 0.16<br>(-0.1,<br>0.37)                         | 0.21<br>(-0.07,<br>0.45)           | 0.01<br>(-0.26,<br>0.24)                                | 0.07<br>(-0.16,<br>0.25)                   | 0.08<br>(-0.16,<br>0.29)                                   | 0.12<br>(-0.09,<br>0.29)                      | 0.14<br>(-0.14,<br>0.36)                                   | 0.14<br>(-0.14,<br>0.37)                      |
| log VL Day2<br>PostChal-<br>lenge<br>OPswab N1               | 0.26<br>(0.04,<br>0.41)                         | 0.17<br>(-0.04,<br>0.28)           | 0.21<br>(0.05,<br>0.31)                                 | 0.23<br>(0.09,<br>0.32)                    | 0.12<br>(-0.07,<br>0.26)                                   | 0.07<br>(-0.13,<br>0.21)                      | 0.18<br>(-0.04,<br>0.32)                                   | 0.16<br>(-0.03,<br>0.29)                      |
| log VL Day2<br>PostChal-<br>lenge<br>OPswab<br>Subgenomic    | 0.33<br>(0.11,<br>0.5)                          | 0.21<br>(-0.01,<br>0.36)           | 0.27<br>(0.11,<br>0.39)                                 | 0.29<br>(0.14,<br>0.4)                     | 0.16<br>(-0.06,<br>0.33)                                   | 0.1<br>(-0.12,<br>0.29)                       | 0.24<br>(0.02,<br>0.42)                                    | 0.22<br>(0,<br>0.39)                          |
| log VL Day2<br>PostChal-<br>lenge<br>NasalSwab<br>N1         | 0.5<br>(0.22,<br>0.71)                          | 0.36<br>(0.03,<br>0.61)            | 0.35<br>(0.09,<br>0.55)                                 | 0.29<br>(0.08,<br>0.46)                    | 0.34<br>(0.08,<br>0.56)                                    | 0.33<br>(0.04,<br>0.57)                       | 0.44<br>(0.13,<br>0.67)                                    | 0.43<br>(0.11,<br>0.67)                       |
| log VL Day2<br>PostChal-<br>lenge<br>NasalSwab<br>Subgenomic | 0.51<br>(0.24,<br>0.7)                          | 0.38<br>(0.07,<br>0.59)            | 0.32<br>(0.08,<br>0.5)                                  | 0.28<br>(0.08,<br>0.42)                    | 0.32<br>(0.09,<br>0.54)                                    | 0.31<br>(0.01,<br>0.59)                       | 0.43<br>(0.13,<br>0.64)                                    | 0.41<br>(0.11,<br>0.64)                       |

Table 6.8.4: RMAC with Novavax Vaccine Product Excluded

|                                                              | log<br>MN 2<br>weeks<br>prior<br>chal-<br>lenge | log<br>MN<br>day<br>chal-<br>lenge | log<br>MSD<br>ECL 2<br>weeks<br>prior<br>chal-<br>lenge | log<br>MSD<br>ECL<br>day<br>chal-<br>lenge | log<br>PsVNA<br>ID50 2<br>weeks<br>prior<br>chal-<br>lenge | log<br>PsVNA<br>ID50<br>day<br>chal-<br>lenge | log<br>PsVNA<br>ID80 2<br>weeks<br>prior<br>chal-<br>lenge | log<br>PsVNA<br>ID80<br>day<br>chal-<br>lenge |
|--------------------------------------------------------------|-------------------------------------------------|------------------------------------|---------------------------------------------------------|--------------------------------------------|------------------------------------------------------------|-----------------------------------------------|------------------------------------------------------------|-----------------------------------------------|
| AUC BAL<br>N1                                                | -0.22<br>(-0.6,<br>-0.01)                       | 0.25<br>(-0.25,<br>0.49)           | -0.14<br>(-0.63,<br>0.17)                               | -0.06<br>(-0.58,<br>0.24)                  | 0.06<br>(-0.45,<br>0.34)                                   | -0.15<br>(-0.61,<br>0.13)                     | 0.03<br>(-0.45,<br>0.32)                                   | -0.02<br>(-0.48,<br>0.21)                     |
| AUC BAL<br>Subgenomic                                        | -0.35<br>(-0.67,<br>-0.08)                      | 0.22<br>(-0.26,<br>0.57)           | -0.23<br>(-0.64,<br>0.13)                               | -0.06<br>(-0.51,<br>0.34)                  | -0.2<br>(-0.63,<br>0.15)                                   | -0.44<br>(-0.79,<br>-0.13)                    | -0.16<br>(-0.58,<br>0.21)                                  | -0.2<br>(-0.61,<br>0.13)                      |
| AUC Nasal<br>Swab N1                                         | 0.02<br>(-0.67,<br>0.32)                        | 0.01<br>(-0.61,<br>0.29)           | 0.03<br>(-0.62,<br>0.33)                                | 0.09<br>(-0.6,<br>0.38)                    | 0.06<br>(-0.63,<br>0.36)                                   | 0.02<br>(-0.63,<br>0.32)                      | 0.08<br>(-0.63,<br>0.4)                                    | 0.18<br>(-0.49,<br>0.43)                      |
| AUC Nasal<br>Swab<br>Subgenomic                              | 0.15<br>(-0.66,<br>0.48)                        | 0.14<br>(-0.53,<br>0.44)           | 0.03<br>(-0.64,<br>0.39)                                | 0.08<br>(-0.61,<br>0.41)                   | 0.33<br>(-0.42,<br>0.6)                                    | 0.08<br>(-0.61,<br>0.41)                      | 0.35<br>(-0.47,<br>0.64)                                   | 0.38<br>(-0.36,<br>0.6)                       |
| AUC OP<br>Swab N1                                            | -0.07<br>(-0.61,<br>0.26)                       | -0.04<br>(-0.59,<br>0.28)          | 0<br>(-0.57,<br>0.33)                                   | 0.06<br>(-0.55,<br>0.38)                   | 0.25<br>(-0.43,<br>0.55)                                   | -0.15<br>(-0.67,<br>0.19)                     | 0.17<br>(-0.5,<br>0.51)                                    | 0.24<br>(-0.36,<br>0.52)                      |
| AUC OP<br>Swab<br>Subgenomic                                 | -0.27<br>(-0.71,<br>0.07)                       | -0.33<br>(-0.77,<br>0.02)          | -0.24<br>(-0.7,<br>0.1)                                 | -0.15<br>(-0.66,<br>0.2)                   | 0 (-0.6,<br>0.36)                                          | -0.52<br>(-0.84,<br>-0.23)                    | -0.08<br>(-0.67,<br>0.28)                                  | -0.1<br>(-0.63,<br>0.24)                      |
| log VL Day2<br>PostChal-<br>lenge BAL<br>N1                  | -0.19<br>(-0.43,<br>-0.02)                      | 0.05<br>(-0.29,<br>0.28)           | -0.23<br>(-0.49,<br>-0.01)                              | -0.2<br>(-0.47,<br>0.02)                   | 0.02<br>(-0.29,<br>0.25)                                   | -0.18<br>(-0.45,<br>0.01)                     | -0.06<br>(-0.36,<br>0.17)                                  | -0.08<br>(-0.35,<br>0.11)                     |
| log VL Day2<br>PostChal-<br>lenge BAL<br>Subgenomic          | -0.26<br>(-0.69,<br>-0.02)                      | 0.05<br>(-0.54,<br>0.33)           | -0.28<br>(-0.76,<br>0.04)                               | -0.22<br>(-0.74,<br>0.09)                  | 0.06<br>(-0.46,<br>0.31)                                   | -0.23<br>(-0.73,<br>0.05)                     | -0.03<br>(-0.55,<br>0.23)                                  | -0.14<br>(-0.64,<br>0.11)                     |
| log VL Day2<br>PostChal-<br>lenge<br>OPswab N1               | -0.09<br>(-0.31,<br>0.07)                       | -0.19<br>(-0.41,<br>-0.03)         | -0.15<br>(-0.39,<br>0.02)                               | -0.13<br>(-0.36,<br>0.05)                  | -0.13<br>(-0.37,<br>0.05)                                  | -0.18<br>(-0.39,<br>-0.03)                    | -0.09<br>(-0.33,<br>0.09)                                  | -0.09<br>(-0.32,<br>0.08)                     |
| log VL Day2<br>PostChal-<br>lenge<br>OPswab<br>Subgenomic    | -0.08<br>(-0.47,<br>0.15)                       | -0.23<br>(-0.59,<br>0.02)          | -0.17<br>(-0.56,<br>0.08)                               | -0.14<br>(-0.52,<br>0.11)                  | -0.07<br>(-0.47,<br>0.17)                                  | -0.15<br>(-0.54,<br>0.08)                     | -0.03<br>(-0.45,<br>0.22)                                  | -0.04<br>(-0.42,<br>0.19)                     |
| log VL Day2<br>PostChal-<br>lenge<br>NasalSwab<br>N1         | 0.09<br>(-0.22,<br>0.34)                        | 0.02<br>(-0.28,<br>0.24)           | 0.09<br>(-0.19,<br>0.31)                                | 0.03<br>(-0.25,<br>0.26)                   | 0.25<br>(-0.07,<br>0.51)                                   | 0.1<br>(-0.18,<br>0.32)                       | 0.22<br>(-0.12,<br>0.5)                                    | 0.21<br>(-0.06,<br>0.42)                      |
| log VL Day2<br>PostChal-<br>lenge<br>NasalSwab<br>Subgenomic | 0.05<br>(-0.36,<br>0.33)                        | -0.05<br>(-0.46,<br>0.22)          | 0<br>(-0.38,<br>0.26)                                   | -0.05<br>(-0.42,<br>0.2)                   | 0.21<br>(-0.22,<br>0.47)                                   | 0<br>(-0.39,<br>0.27)                         | 0.19<br>(-0.25,<br>0.47)                                   | 0.13<br>(-0.28,<br>0.39)                      |

Table 6.8.5: RMAC Average

|                                                              | log MN<br>2 weeks<br>prior<br>chal-<br>lenge | log MN<br>day<br>chal-<br>lenge | log<br>MSD<br>ECL 2<br>weeks<br>prior<br>chal-<br>lenge | log<br>MSD<br>ECL<br>day<br>chal-<br>lenge | log<br>PsVNA<br>ID50 2<br>weeks<br>prior<br>chal-<br>lenge | log<br>PsVNA<br>ID50<br>day<br>chal-<br>lenge | log<br>PsVNA<br>ID80 2<br>weeks<br>prior<br>chal-<br>lenge | log<br>PsVNA<br>ID80<br>day<br>chal-<br>lenge |
|--------------------------------------------------------------|----------------------------------------------|---------------------------------|---------------------------------------------------------|--------------------------------------------|------------------------------------------------------------|-----------------------------------------------|------------------------------------------------------------|-----------------------------------------------|
| AUC BAL<br>N1                                                | 0.1625                                       | 0.4350                          | 0.0625                                                  | 0.1825                                     | 0.1125                                                     | 0.0800                                        | 0.1425                                                     | 0.1800                                        |
| AUC BAL<br>Subgenomic                                        | 0.0625                                       | 0.3325                          | -0.0100                                                 | 0.1325                                     | 0.0000                                                     | -0.0650                                       | 0.0425                                                     | 0.0600                                        |
| AUC Nasal<br>Swab N1                                         | 0.2475                                       | 0.2575                          | 0.2000                                                  | 0.3025                                     | 0.1525                                                     | 0.1400                                        | 0.1850                                                     | 0.2925                                        |
| AUC Nasal<br>Swab<br>Subgenomic                              | 0.3275                                       | 0.3525                          | 0.1875                                                  | 0.2700                                     | 0.2375                                                     | 0.1625                                        | 0.2850                                                     | 0.3625                                        |
| AUC OP<br>Swab N1                                            | 0.1300                                       | 0.1625                          | 0.1575                                                  | 0.2325                                     | 0.1675                                                     | 0.0350                                        | 0.1700                                                     | 0.2500                                        |
| AUC OP<br>Swab<br>Subgenomic                                 | 0.0250                                       | 0.0125                          | 0.0150                                                  | 0.1100                                     | 0.0300                                                     | -0.1600                                       | 0.0350                                                     | 0.0550                                        |
| log VL Day2<br>PostChal-<br>lenge BAL<br>N1                  | 0.0925                                       | 0.2550                          | 0.0000                                                  | 0.0475                                     | 0.1400                                                     | 0.0450                                        | 0.1125                                                     | 0.1250                                        |
| log VL Day2<br>PostChal-<br>lenge BAL<br>Subgenomic          | 0.1050                                       | 0.2500                          | 0.0275                                                  | 0.0850                                     | 0.1600                                                     | 0.0600                                        | 0.1500                                                     | 0.1275                                        |
| log VL Day2<br>PostChal-<br>lenge<br>OPswab N1               | 0.1275                                       | 0.0100                          | 0.0350                                                  | 0.0575                                     | 0.0250                                                     | 0.0025                                        | 0.0625                                                     | 0.0775                                        |
| log VL Day2<br>PostChal-<br>lenge<br>OPswab<br>Subgenomic    | 0.1975                                       | 0.0650                          | 0.0950                                                  | 0.1200                                     | 0.1025                                                     | 0.0850                                        | 0.1425                                                     | 0.1600                                        |
| log VL Day2<br>PostChal-<br>lenge<br>NasalSwab<br>N1         | 0.4200                                       | 0.3650                          | 0.3225                                                  | 0.2800                                     | 0.3975                                                     | 0.3125                                        | 0.4075                                                     | 0.4375                                        |
| log VL Day2<br>PostChal-<br>lenge<br>NasalSwab<br>Subgenomic | 0.3825                                       | 0.3125                          | 0.2450                                                  | 0.2150                                     | 0.3350                                                     | 0.2500                                        | 0.3525                                                     | 0.3625                                        |



Pairs of Vaccine Products

Table 6.8.6: RMAC using Sanofi to predict Moderna

|                                                              | log<br>MN 2<br>weeks<br>prior<br>chal-<br>lenge | log<br>MN<br>day<br>chal-<br>lenge | log<br>MSD<br>ECL 2<br>weeks<br>prior<br>chal-<br>lenge | log<br>MSD<br>ECL<br>day<br>chal-<br>lenge | log<br>PsVNA<br>ID50 2<br>weeks<br>prior<br>chal-<br>lenge | log<br>PsVNA<br>ID50<br>day<br>chal-<br>lenge | log<br>PsVNA<br>ID80 2<br>weeks<br>prior<br>chal-<br>lenge | log<br>PsVNA<br>ID80<br>day<br>chal-<br>lenge |
|--------------------------------------------------------------|-------------------------------------------------|------------------------------------|---------------------------------------------------------|--------------------------------------------|------------------------------------------------------------|-----------------------------------------------|------------------------------------------------------------|-----------------------------------------------|
| AUC BAL<br>N1                                                | 0.3<br>(-0.04,<br>0.56)                         | 0.46<br>(0.12,<br>0.7)             | 0.49<br>(0.17,<br>0.7)                                  | 0.47<br>(0.15,<br>0.69)                    | 0.27<br>(-0.01,<br>0.47)                                   | 0.21<br>(-0.06,<br>0.4)                       | 0.3<br>(0.02,<br>0.53)                                     | 0.28<br>(-0.02,<br>0.49)                      |
| AUC BAL<br>Subgenomic                                        | 0.21<br>(-0.06,<br>0.4)                         | 0.39<br>(0.08,<br>0.61)            | 0.39<br>(0.11,<br>0.59)                                 | 0.4<br>(0.12,<br>0.59)                     | 0.14<br>(-0.05,<br>0.29)                                   | 0.1<br>(-0.09,<br>0.23)                       | 0.2<br>(-0.02,<br>0.36)                                    | 0.17<br>(-0.05,<br>0.33)                      |
| AUC Nasal<br>Swab N1                                         | 0.36<br>(0.05,<br>0.54)                         | 0.34<br>(0.03,<br>0.55)            | 0.67<br>(0.43,<br>0.8)                                  | 0.67<br>(0.43,<br>0.81)                    | 0.32<br>(0.04,<br>0.5)                                     | 0.28<br>(0.02,<br>0.44)                       | 0.36<br>(0.09,<br>0.52)                                    | 0.41<br>(0.14,<br>0.56)                       |
| AUC Nasal<br>Swab<br>Subgenomic                              | 0.51<br>(0.27,<br>0.68)                         | 0.47<br>(0.22,<br>0.64)            | 0.65<br>(0.49,<br>0.75)                                 | 0.6<br>(0.42,<br>0.72)                     | 0.53<br>(0.31,<br>0.67)                                    | 0.38<br>(0.12,<br>0.54)                       | 0.54<br>(0.33,<br>0.67)                                    | 0.5<br>(0.27,<br>0.65)                        |
| AUC OP<br>Swab N1                                            | 0.53<br>(0.24,<br>0.7)                          | 0.44<br>(0.18,<br>0.6)             | 0.45<br>(0.19,<br>0.63)                                 | 0.47<br>(0.17,<br>0.66)                    | 0.6<br>(0.27,<br>0.79)                                     | 0.32<br>(0.03,<br>0.51)                       | 0.59<br>(0.32,<br>0.76)                                    | 0.52<br>(0.17,<br>0.72)                       |
| AUC OP<br>Swab<br>Subgenomic                                 | 0.37<br>(0.11,<br>0.53)                         | 0.19<br>(0,<br>0.29)               | 0.36<br>(0.02,<br>0.62)                                 | 0.35<br>(-0.03,<br>0.62)                   | 0.48<br>(0.2,<br>0.66)                                     | 0.15<br>(-0.06,<br>0.28)                      | 0.42<br>(0.16,<br>0.59)                                    | 0.34<br>(0.02,<br>0.54)                       |
| log VL Day2<br>PostChal-<br>lenge BAL<br>N1                  | 0.14<br>(-0.22,<br>0.38)                        | 0.29<br>(-0.05,<br>0.49)           | 0.19<br>(-0.27,<br>0.55)                                | 0.2<br>(-0.23,<br>0.55)                    | 0.2<br>(-0.07,<br>0.37)                                    | 0.08<br>(-0.16,<br>0.22)                      | 0.17<br>(-0.1,<br>0.34)                                    | 0.17<br>(-0.12,<br>0.35)                      |
| log VL Day2<br>PostChal-<br>lenge BAL<br>Subgenomic          | 0.26<br>(-0.11,<br>0.49)                        | 0.38<br>(0.03,<br>0.59)            | 0.3<br>(-0.17,<br>0.64)                                 | 0.32<br>(-0.13,<br>0.63)                   | 0.31<br>(0.05,<br>0.47)                                    | 0.15<br>(-0.08,<br>0.28)                      | 0.29<br>(0.01,<br>0.47)                                    | 0.27<br>(-0.03,<br>0.45)                      |
| log VL Day2<br>PostChal-<br>lenge<br>OPswab N1               | 0.08<br>(-0.28,<br>0.39)                        | 0.01<br>(-0.21,<br>0.15)           | 0.07<br>(-0.35,<br>0.46)                                | 0.04<br>(-0.41,<br>0.48)                   | 0.06<br>(-0.25,<br>0.33)                                   | 0.07<br>(-0.16,<br>0.26)                      | 0.06<br>(-0.28,<br>0.37)                                   | 0.08<br>(-0.25,<br>0.37)                      |
| log VL Day2<br>PostChal-<br>lenge<br>OPswab<br>Subgenomic    | 0.22<br>(-0.13,<br>0.48)                        | 0.11<br>(-0.16,<br>0.27)           | 0.18<br>(-0.25,<br>0.53)                                | 0.16<br>(-0.26,<br>0.55)                   | 0.17<br>(-0.17,<br>0.44)                                   | 0.21<br>(-0.09,<br>0.44)                      | 0.19<br>(-0.17,<br>0.46)                                   | 0.22<br>(-0.13,<br>0.47)                      |
| log VL Day2<br>PostChal-<br>lenge<br>NasalSwab<br>N1         | 0.49<br>(0.27,<br>0.64)                         | 0.48<br>(0.25,<br>0.63)            | 0.6<br>(0.36,<br>0.74)                                  | 0.53<br>(0.27,<br>0.69)                    | 0.5<br>(0.27,<br>0.67)                                     | 0.34<br>(0.14,<br>0.47)                       | 0.45<br>(0.27,<br>0.59)                                    | 0.49<br>(0.24,<br>0.67)                       |
| log VL Day2<br>PostChal-<br>lenge<br>NasalSwab<br>Subgenomic | 0.4<br>(0.17,<br>0.62)                          | 0.36<br>(0.08,<br>0.59)            | 0.44<br>(0.19,<br>0.65)                                 | 0.37<br>(0.08,<br>0.61)                    | 0.37<br>(0.06,<br>0.66)                                    | 0.27<br>(0.01,<br>0.49)                       | 0.35<br>(0.12,<br>0.58)                                    | 0.35<br>(0.03,<br>0.65)                       |

Table 6.8.7: RMAC using Sanofi to predict Janssen

|                                                              | log<br>MN 2<br>weeks<br>prior<br>chal-<br>lenge | log<br>MN<br>day<br>chal-<br>lenge | log<br>MSD<br>ECL 2<br>weeks<br>prior<br>chal-<br>lenge | log<br>MSD<br>ECL<br>day<br>chal-<br>lenge | log<br>PsVNA<br>ID50 2<br>weeks<br>prior<br>chal-<br>lenge | log<br>PsVNA<br>ID50<br>day<br>chal-<br>lenge | log<br>PsVNA<br>ID80 2<br>weeks<br>prior<br>chal-<br>lenge | log<br>PsVNA<br>ID80<br>day<br>chal-<br>lenge |
|--------------------------------------------------------------|-------------------------------------------------|------------------------------------|---------------------------------------------------------|--------------------------------------------|------------------------------------------------------------|-----------------------------------------------|------------------------------------------------------------|-----------------------------------------------|
| AUC BAL<br>N1                                                | 0.17<br>(-0.22,<br>0.5)                         | 0.41<br>(0.06,<br>0.66)            | -0.2<br>(-0.52,<br>0.19)                                | 0.01<br>(-0.33,<br>0.36)                   | -0.02<br>(-0.3,<br>0.21)                                   | -0.06<br>(-0.35,<br>0.21)                     | 0.07<br>(-0.27,<br>0.34)                                   | 0.13<br>(-0.22,<br>0.42)                      |
| AUC BAL<br>Subgenomic                                        | 0.12<br>(-0.21,<br>0.36)                        | 0.28<br>(-0.06,<br>0.55)           | -0.19<br>(-0.5,<br>0.14)                                | 0<br>(-0.35,<br>0.29)                      | -0.02<br>(-0.29,<br>0.19)                                  | -0.06<br>(-0.33,<br>0.15)                     | 0.04<br>(-0.29,<br>0.3)                                    | 0.07<br>(-0.26,<br>0.33)                      |
| AUC Nasal<br>Swab N1                                         | 0.12<br>(-0.21,<br>0.41)                        | 0.13<br>(-0.29,<br>0.48)           | -0.15<br>(-0.43,<br>0.11)                               | -0.02<br>(-0.31,<br>0.25)                  | -0.04<br>(-0.33,<br>0.24)                                  | -0.04<br>(-0.34,<br>0.23)                     | 0.05<br>(-0.28,<br>0.36)                                   | 0.1<br>(-0.27,<br>0.44)                       |
| AUC Nasal<br>Swab<br>Subgenomic                              | 0.18<br>(-0.14,<br>0.44)                        | 0.28<br>(-0.17,<br>0.62)           | -0.19<br>(-0.43,<br>0.01)                               | -0.06<br>(-0.29,<br>0.19)                  | -0.09<br>(-0.36,<br>0.15)                                  | -0.13<br>(-0.43,<br>0.14)                     | 0.04<br>(-0.27,<br>0.31)                                   | 0.13<br>(-0.24,<br>0.43)                      |
| AUC OP<br>Swab N1                                            | -0.09<br>(-0.41,<br>0.23)                       | 0.03<br>(-0.26,<br>0.3)            | -0.32<br>(-0.53,<br>-0.11)                              | -0.16<br>(-0.41,<br>0.08)                  | -0.22<br>(-0.52,<br>0.02)                                  | -0.18<br>(-0.49,<br>0.03)                     | -0.1<br>(-0.43,<br>0.16)                                   | 0.01<br>(-0.33,<br>0.31)                      |
| AUC OP<br>Swab<br>Subgenomic                                 | -0.2<br>(-0.46,<br>0.07)                        | -0.19<br>(-0.46,<br>0.05)          | -0.4<br>(-0.58,<br>-0.22)                               | -0.28<br>(-0.5,<br>-0.06)                  | -0.35<br>(-0.61,<br>-0.1)                                  | -0.38<br>(-0.61,<br>-0.18)                    | -0.24<br>(-0.51,<br>0)                                     | -0.22<br>(-0.51,<br>0.07)                     |
| log VL Day2<br>PostChal-<br>lenge BAL<br>N1                  | 0.07<br>(-0.17,<br>0.26)                        | 0.16<br>(-0.05,<br>0.31)           | -0.14<br>(-0.42,<br>0.13)                               | -0.02<br>(-0.24,<br>0.16)                  | 0.03<br>(-0.16,<br>0.18)                                   | 0<br>(-0.17,<br>0.13)                         | 0.04<br>(-0.16,<br>0.21)                                   | 0.06<br>(-0.16,<br>0.23)                      |
| log VL Day2<br>PostChal-<br>lenge BAL<br>Subgenomic          | 0.12<br>(-0.13,<br>0.31)                        | 0.18<br>(-0.06,<br>0.37)           | -0.12<br>(-0.4,<br>0.18)                                | 0.02<br>(-0.22,<br>0.22)                   | 0.03<br>(-0.18,<br>0.2)                                    | 0.03<br>(-0.15,<br>0.17)                      | 0.08<br>(-0.16,<br>0.27)                                   | 0.09<br>(-0.15,<br>0.29)                      |
| log VL Day2<br>PostChal-<br>lenge<br>OPswab N1               | 0.21<br>(-0.01,<br>0.37)                        | 0.07<br>(-0.06,<br>0.13)           | 0.08<br>(-0.09,<br>0.2)                                 | 0.15<br>(0,<br>0.26)                       | 0.06<br>(-0.11,<br>0.18)                                   | 0<br>(-0.16,<br>0.11)                         | 0.12<br>(-0.08,<br>0.25)                                   | 0.1<br>(-0.08,<br>0.22)                       |
| log VL Day2<br>PostChal-<br>lenge<br>OPswab<br>Subgenomic    | 0.28<br>(0.06,<br>0.45)                         | 0.13<br>(-0.02,<br>0.23)           | 0.15<br>(-0.05,<br>0.29)                                | 0.24<br>(0.07,<br>0.37)                    | 0.1<br>(-0.09,<br>0.26)                                    | 0.03<br>(-0.17,<br>0.2)                       | 0.18<br>(-0.03,<br>0.35)                                   | 0.16<br>(-0.04,<br>0.32)                      |
| log VL Day2<br>PostChal-<br>lenge<br>NasalSwab<br>N1         | 0.3<br>(0.11,<br>0.47)                          | 0.27<br>(0.02,<br>0.46)            | 0.19<br>(-0.05,<br>0.4)                                 | 0.2<br>(-0.02,<br>0.39)                    | 0.22<br>(0.03,<br>0.4)                                     | 0.16<br>(-0.03,<br>0.31)                      | 0.25<br>(0.05,<br>0.42)                                    | 0.3<br>(0.05,<br>0.52)                        |
| log VL Day2<br>PostChal-<br>lenge<br>NasalSwab<br>Subgenomic | 0.32<br>(0.11,<br>0.51)                         | 0.29<br>(0.05,<br>0.49)            | 0.13<br>(-0.1,<br>0.33)                                 | 0.17<br>(-0.03,<br>0.36)                   | 0.2 (0,<br>0.41)                                           | 0.13<br>(-0.08,<br>0.35)                      | 0.24<br>(0.03,<br>0.43)                                    | 0.29<br>(0.03,<br>0.54)                       |

Table 6.8.8: RMAC using Sanofi to predict Novavax

|                                                              | log<br>MN 2<br>weeks<br>prior<br>chal-<br>lenge | log<br>MN<br>day<br>chal-<br>lenge | log<br>MSD<br>ECL 2<br>weeks<br>prior<br>chal-<br>lenge | log<br>MSD<br>ECL<br>day<br>chal-<br>lenge | log<br>PsVNA<br>ID50 2<br>weeks<br>prior<br>chal-<br>lenge | log<br>PsVNA<br>ID50<br>day<br>chal-<br>lenge | log<br>PsVNA<br>ID80 2<br>weeks<br>prior<br>chal-<br>lenge | log<br>PsVNA<br>ID80<br>day<br>chal-<br>lenge |
|--------------------------------------------------------------|-------------------------------------------------|------------------------------------|---------------------------------------------------------|--------------------------------------------|------------------------------------------------------------|-----------------------------------------------|------------------------------------------------------------|-----------------------------------------------|
| AUC BAL<br>N1                                                | -0.17<br>(-0.52,<br>0.03)                       | 0.18<br>(-0.33,<br>0.44)           | -0.03<br>(-0.51,<br>0.32)                               | -0.14<br>(-0.63,<br>0.21)                  | 0.14<br>(-0.35,<br>0.43)                                   | -0.06<br>(-0.5,<br>0.23)                      | 0.13<br>(-0.32,<br>0.43)                                   | 0<br>(-0.45,<br>0.24)                         |
| AUC BAL<br>Subgenomic                                        | -0.38<br>(-0.69,<br>-0.1)                       | 0.17<br>(-0.33,<br>0.52)           | -0.24<br>(-0.61,<br>0.15)                               | -0.28<br>(-0.68,<br>0.11)                  | -0.16<br>(-0.59,<br>0.21)                                  | -0.36<br>(-0.73,<br>-0.03)                    | -0.13<br>(-0.54,<br>0.25)                                  | -0.21<br>(-0.62,<br>0.13)                     |
| AUC Nasal<br>Swab N1                                         | 0.09<br>(-0.62,<br>0.37)                        | 0.21<br>(-0.42,<br>0.43)           | 0.3<br>(-0.43,<br>0.59)                                 | 0.21<br>(-0.53,<br>0.5)                    | 0.42<br>(-0.33,<br>0.64)                                   | 0.11<br>(-0.58,<br>0.41)                      | 0.29<br>(-0.49,<br>0.56)                                   | 0.34<br>(-0.32,<br>0.54)                      |
| AUC Nasal<br>Swab<br>Subgenomic                              | 0.03<br>(-0.73,<br>0.41)                        | 0.27<br>(-0.41,<br>0.56)           | 0.24<br>(-0.5,<br>0.61)                                 | 0.14<br>(-0.59,<br>0.51)                   | 0.55<br>(-0.19,<br>0.77)                                   | 0.15<br>(-0.58,<br>0.5)                       | 0.37<br>(-0.47,<br>0.68)                                   | 0.38<br>(-0.38,<br>0.64)                      |
| AUC OP<br>Swab N1                                            | 0.13<br>(-0.48,<br>0.48)                        | -0.05<br>(-0.6,<br>0.3)            | 0.54<br>(-0.02,<br>0.75)                                | 0.44<br>(-0.24,<br>0.69)                   | 0.59<br>(-0.02,<br>0.81)                                   | -0.12<br>(-0.67,<br>0.24)                     | 0.5<br>(-0.21,<br>0.76)                                    | 0.45<br>(-0.13,<br>0.71)                      |
| AUC OP<br>Swab<br>Subgenomic                                 | -0.34<br>(-0.75,<br>0.02)                       | -0.57<br>(-0.87,<br>-0.29)         | 0.18<br>(-0.39,<br>0.46)                                | 0.06<br>(-0.53,<br>0.39)                   | 0.3<br>(-0.37,<br>0.59)                                    | -0.56<br>(-0.86,<br>-0.26)                    | 0.07<br>(-0.62,<br>0.41)                                   | 0<br>(-0.58,<br>0.35)                         |
| log VL Day2<br>PostChal-<br>lenge BAL<br>N1                  | -0.26<br>(-0.49,<br>-0.07)                      | -0.14<br>(-0.45,<br>0.11)          | -0.18<br>(-0.5,<br>0.1)                                 | -0.26<br>(-0.55,<br>-0.01)                 | -0.12<br>(-0.43,<br>0.14)                                  | -0.3<br>(-0.55,<br>-0.09)                     | -0.19<br>(-0.48,<br>0.06)                                  | -0.16<br>(-0.45,<br>0.05)                     |
| log VL Day2<br>PostChal-<br>lenge BAL<br>Subgenomic          | -0.32<br>(-0.72,<br>-0.05)                      | -0.06<br>(-0.63,<br>0.27)          | -0.19<br>(-0.67,<br>0.19)                               | -0.28<br>(-0.75,<br>0.09)                  | -0.09<br>(-0.61,<br>0.22)                                  | -0.38<br>(-0.81,<br>-0.06)                    | -0.14<br>(-0.65,<br>0.18)                                  | -0.23<br>(-0.7,<br>0.07)                      |
| log VL Day2<br>PostChal-<br>lenge<br>OPswab N1               | -0.01<br>(-0.24,<br>0.17)                       | -0.22<br>(-0.44,<br>-0.05)         | -0.07<br>(-0.34,<br>0.14)                               | -0.06<br>(-0.32,<br>0.13)                  | -0.03<br>(-0.3,<br>0.19)                                   | -0.14<br>(-0.36,<br>0.03)                     | 0.02<br>(-0.25,<br>0.24)                                   | -0.02<br>(-0.26,<br>0.18)                     |
| log VL Day2<br>PostChal-<br>lenge<br>OPswab<br>Subgenomic    | -0.01<br>(-0.41,<br>0.24)                       | -0.26<br>(-0.61,<br>-0.01)         | -0.02<br>(-0.47,<br>0.25)                               | -0.02<br>(-0.44,<br>0.24)                  | 0.08<br>(-0.36,<br>0.34)                                   | -0.11<br>(-0.52,<br>0.15)                     | 0.1<br>(-0.35,<br>0.37)                                    | 0.03<br>(-0.37,<br>0.28)                      |
| log VL Day2<br>PostChal-<br>lenge<br>NasalSwab<br>N1         | -0.07<br>(-0.36,<br>0.17)                       | -0.06<br>(-0.34,<br>0.16)          | 0.05<br>(-0.25,<br>0.3)                                 | 0 (-0.3,<br>0.25)                          | 0.1<br>(-0.2,<br>0.37)                                     | -0.08<br>(-0.35,<br>0.14)                     | -0.01<br>(-0.31,<br>0.26)                                  | 0.09<br>(-0.18,<br>0.31)                      |
| log VL Day2<br>PostChal-<br>lenge<br>NasalSwab<br>Subgenomic | -0.16<br>(-0.53,<br>0.11)                       | -0.17<br>(-0.55,<br>0.11)          | -0.05<br>(-0.45,<br>0.24)                               | -0.08<br>(-0.46,<br>0.2)                   | 0.06<br>(-0.37,<br>0.35)                                   | -0.19<br>(-0.55,<br>0.09)                     | -0.08<br>(-0.48,<br>0.21)                                  | 0.01<br>(-0.4,<br>0.3)                        |

Table 6.8.9: RMAC using Moderna to predict Sanofi

|                                                              | log<br>MN 2<br>weeks<br>prior<br>chal-<br>lenge | log<br>MN<br>day<br>chal-<br>lenge | log<br>MSD<br>ECL 2<br>weeks<br>prior<br>chal-<br>lenge | log<br>MSD<br>ECL<br>day<br>chal-<br>lenge | log<br>PsVNA<br>ID50 2<br>weeks<br>prior<br>chal-<br>lenge | log<br>PsVNA<br>ID50<br>day<br>chal-<br>lenge | log<br>PsVNA<br>ID80 2<br>weeks<br>prior<br>chal-<br>lenge | log<br>PsVNA<br>ID80<br>day<br>chal-<br>lenge |
|--------------------------------------------------------------|-------------------------------------------------|------------------------------------|---------------------------------------------------------|--------------------------------------------|------------------------------------------------------------|-----------------------------------------------|------------------------------------------------------------|-----------------------------------------------|
| AUC BAL<br>N1                                                | 0.43<br>(0.1,<br>0.63)                          | 0.58<br>(0.31,<br>0.75)            | 0.35<br>(0.13,<br>0.54)                                 | 0.32<br>(0.09,<br>0.51)                    | 0.32<br>(0.02,<br>0.53)                                    | 0.41<br>(0.18,<br>0.57)                       | 0.38<br>(0.05,<br>0.58)                                    | 0.41<br>(0.12,<br>0.61)                       |
| AUC BAL<br>Subgenomic                                        | 0.3<br>(-0.07,<br>0.56)                         | 0.51<br>(0.12,<br>0.71)            | 0.27<br>(-0.01,<br>0.48)                                | 0.26<br>(-0.03,<br>0.47)                   | 0.19<br>(-0.12,<br>0.41)                                   | 0.21<br>(-0.09,<br>0.39)                      | 0.27<br>(-0.1,<br>0.53)                                    | 0.27<br>(-0.06,<br>0.5)                       |
| AUC Nasal<br>Swab N1                                         | 0.37<br>(0.16,<br>0.51)                         | 0.38<br>(0.17,<br>0.52)            | 0.48<br>(0.25,<br>0.63)                                 | 0.45<br>(0.23,<br>0.6)                     | 0.32<br>(0.13,<br>0.47)                                    | 0.44<br>(0.12,<br>0.65)                       | 0.35<br>(0.13,<br>0.52)                                    | 0.49<br>(0.27,<br>0.62)                       |
| AUC Nasal<br>Swab<br>Subgenomic                              | 0.46<br>(0.18,<br>0.65)                         | 0.51<br>(0.31,<br>0.67)            | 0.4<br>(0.11,<br>0.65)                                  | 0.34<br>(0.06,<br>0.58)                    | 0.48<br>(0.24,<br>0.67)                                    | 0.5<br>(0.17,<br>0.72)                        | 0.45<br>(0.2,<br>0.64)                                     | 0.51<br>(0.24,<br>0.71)                       |
| AUC OP<br>Swab N1                                            | 0.24<br>(0.09,<br>0.5)                          | 0.17<br>(-0.03,<br>0.5)            | 0.21<br>(0.06,<br>0.48)                                 | 0.18<br>(0.03,<br>0.43)                    | 0.28<br>(0.12,<br>0.51)                                    | 0.17<br>(-0.05,<br>0.54)                      | 0.25<br>(0.09,<br>0.54)                                    | 0.26<br>(0.09,<br>0.53)                       |
| AUC OP<br>Swab<br>Subgenomic                                 | 0.14<br>(0.03,<br>0.47)                         | 0.07<br>(-0.06,<br>0.42)           | 0.13<br>(0.01,<br>0.52)                                 | 0.11<br>(-0.01,<br>0.47)                   | 0.19<br>(0.06,<br>0.52)                                    | 0.07<br>(-0.07,<br>0.54)                      | 0.15<br>(0.02,<br>0.55)                                    | 0.15<br>(0.03,<br>0.52)                       |
| log VL Day2<br>PostChal-<br>lenge BAL<br>N1                  | 0.21<br>(-0.15,<br>0.44)                        | 0.31<br>(-0.02,<br>0.53)           | 0.03<br>(-0.27,<br>0.22)                                | 0 (-0.3,<br>0.2)                           | 0.24<br>(-0.12,<br>0.48)                                   | 0.14<br>(-0.2,<br>0.36)                       | 0.2<br>(-0.13,<br>0.45)                                    | 0.22<br>(-0.18,<br>0.49)                      |
| log VL Day2<br>PostChal-<br>lenge BAL<br>Subgenomic          | 0.24<br>(-0.09,<br>0.46)                        | 0.31<br>(0.01,<br>0.52)            | 0.09<br>(-0.18,<br>0.27)                                | 0.06<br>(-0.21,<br>0.26)                   | 0.24<br>(-0.08,<br>0.47)                                   | 0.16<br>(-0.15,<br>0.39)                      | 0.23<br>(-0.1,<br>0.48)                                    | 0.22<br>(-0.1,<br>0.45)                       |
| log VL Day2<br>PostChal-<br>lenge<br>OPswab N1               | 0.06<br>(-0.05,<br>0.09)                        | 0.01<br>(-0.09,<br>0.02)           | 0.03<br>(-0.08,<br>0.05)                                | 0.03<br>(-0.07,<br>0.04)                   | 0.03<br>(-0.07,<br>0.07)                                   | 0.06<br>(-0.05,<br>0.12)                      | 0.04<br>(-0.06,<br>0.07)                                   | 0.06<br>(-0.04,<br>0.1)                       |
| log VL Day2<br>PostChal-<br>lenge<br>OPswab<br>Subgenomic    | 0.17<br>(0,<br>0.27)                            | 0.07<br>(-0.07,<br>0.16)           | 0.08<br>(-0.05,<br>0.14)                                | 0.08<br>(-0.05,<br>0.12)                   | 0.11<br>(-0.04,<br>0.19)                                   | 0.2<br>(-0.05,<br>0.35)                       | 0.13<br>(-0.03,<br>0.21)                                   | 0.16<br>(-0.01,<br>0.26)                      |
| log VL Day2<br>PostChal-<br>lenge<br>NasalSwab<br>N1         | 0.45<br>(0.13,<br>0.65)                         | 0.46<br>(0.16,<br>0.63)            | 0.26<br>(-0.08,<br>0.48)                                | 0.23<br>(-0.1,<br>0.45)                    | 0.44<br>(0.14,<br>0.62)                                    | 0.37<br>(0.02,<br>0.58)                       | 0.36<br>(0.07,<br>0.61)                                    | 0.49<br>(0.16,<br>0.69)                       |
| log VL Day2<br>PostChal-<br>lenge<br>NasalSwab<br>Subgenomic | 0.43<br>(0.07,<br>0.64)                         | 0.41<br>(0.09,<br>0.58)            | 0.18<br>(-0.22,<br>0.38)                                | 0.15<br>(-0.23,<br>0.36)                   | 0.41<br>(0.07,<br>0.59)                                    | 0.33<br>(-0.06,<br>0.54)                      | 0.34<br>(0.04,<br>0.58)                                    | 0.44<br>(0.05,<br>0.63)                       |

Table 6.8.10: RMAC using Moderna to predict Janssen

|                                                              | log<br>MN 2<br>weeks<br>prior<br>chal-<br>lenge | log<br>MN<br>day<br>chal-<br>lenge | log<br>MSD<br>ECL 2<br>weeks<br>prior<br>chal-<br>lenge | log<br>MSD<br>ECL<br>day<br>chal-<br>lenge | log<br>PsVNA<br>ID50 2<br>weeks<br>prior<br>chal-<br>lenge | log<br>PsVNA<br>ID50<br>day<br>chal-<br>lenge | log<br>PsVNA<br>ID80 2<br>weeks<br>prior<br>chal-<br>lenge | log<br>PsVNA<br>ID80<br>day<br>chal-<br>lenge |
|--------------------------------------------------------------|-------------------------------------------------|------------------------------------|---------------------------------------------------------|--------------------------------------------|------------------------------------------------------------|-----------------------------------------------|------------------------------------------------------------|-----------------------------------------------|
| AUC BAL<br>N1                                                | 0.02<br>(-0.35,<br>0.34)                        | 0.37<br>(0.02,<br>0.63)            | -0.14<br>(-0.47,<br>0.25)                               | 0.08<br>(-0.27,<br>0.42)                   | -0.2<br>(-0.48,<br>0.03)                                   | -0.15<br>(-0.42,<br>0.1)                      | -0.09<br>(-0.41,<br>0.19)                                  | 0.05<br>(-0.3,<br>0.36)                       |
| AUC BAL<br>Subgenomic                                        | 0<br>(-0.36,<br>0.32)                           | 0.27<br>(-0.1,<br>0.56)            | -0.18<br>(-0.49,<br>0.19)                               | 0.06<br>(-0.31,<br>0.39)                   | -0.22<br>(-0.5,<br>0.05)                                   | -0.19<br>(-0.46,<br>0.03)                     | -0.11<br>(-0.45,<br>0.2)                                   | -0.02<br>(-0.37,<br>0.3)                      |
| AUC Nasal<br>Swab N1                                         | -0.15<br>(-0.45,<br>0.16)                       | -0.11<br>(-0.47,<br>0.25)          | -0.21<br>(-0.46,<br>0.02)                               | -0.09<br>(-0.35,<br>0.16)                  | -0.36<br>(-0.58,<br>-0.15)                                 | -0.29<br>(-0.57,<br>-0.02)                    | -0.25<br>(-0.53,<br>0.03)                                  | -0.12<br>(-0.45,<br>0.21)                     |
| AUC Nasal<br>Swab<br>Subgenomic                              | 0.11<br>(-0.24,<br>0.39)                        | 0.16<br>(-0.25,<br>0.49)           | -0.06<br>(-0.31,<br>0.16)                               | 0.05<br>(-0.18,<br>0.31)                   | -0.22<br>(-0.47,<br>0.01)                                  | -0.16<br>(-0.47,<br>0.12)                     | -0.05<br>(-0.37,<br>0.23)                                  | 0.11<br>(-0.27,<br>0.42)                      |
| AUC OP<br>Swab N1                                            | -0.09<br>(-0.38,<br>0.2)                        | 0.05<br>(-0.26,<br>0.34)           | -0.06<br>(-0.32,<br>0.14)                               | 0.04<br>(-0.19,<br>0.22)                   | -0.2<br>(-0.49,<br>0.02)                                   | -0.12<br>(-0.43,<br>0.1)                      | -0.09<br>(-0.42,<br>0.17)                                  | 0.06<br>(-0.27,<br>0.34)                      |
| AUC OP<br>Swab<br>Subgenomic                                 | -0.12<br>(-0.39,<br>0.16)                       | -0.03<br>(-0.35,<br>0.24)          | -0.13<br>(-0.37,<br>0.07)                               | -0.02<br>(-0.26,<br>0.17)                  | -0.27<br>(-0.54,<br>-0.01)                                 | -0.27<br>(-0.53,<br>-0.03)                    | -0.15<br>(-0.44,<br>0.1)                                   | -0.1<br>(-0.41,<br>0.19)                      |
| log VL Day2<br>PostChal-<br>lenge BAL<br>N1                  | 0.11<br>(-0.13,<br>0.27)                        | 0.23<br>(-0.09,<br>0.47)           | 0.01<br>(-0.23,<br>0.18)                                | 0.05<br>(-0.2,<br>0.2)                     | 0.13<br>(-0.11,<br>0.31)                                   | 0.1<br>(-0.09,<br>0.24)                       | 0.15<br>(-0.14,<br>0.37)                                   | 0.14<br>(-0.15,<br>0.33)                      |
| log VL Day2<br>PostChal-<br>lenge BAL<br>Subgenomic          | 0.14<br>(-0.09,<br>0.32)                        | 0.21<br>(-0.08,<br>0.46)           | 0.01<br>(-0.23,<br>0.2)                                 | 0.06<br>(-0.17,<br>0.22)                   | 0.09<br>(-0.17,<br>0.31)                                   | 0.12<br>(-0.09,<br>0.29)                      | 0.15<br>(-0.14,<br>0.39)                                   | 0.14<br>(-0.14,<br>0.37)                      |
| log VL Day2<br>PostChal-<br>lenge<br>OPswab N1               | 0<br>(-0.13,<br>0.05)                           | -0.03<br>(-0.16,<br>0.01)          | -0.01<br>(-0.13,<br>0.04)                               | -0.01<br>(-0.14,<br>0.03)                  | -0.02<br>(-0.15,<br>0.03)                                  | -0.02<br>(-0.14,<br>0.04)                     | -0.01<br>(-0.13,<br>0.04)                                  | -0.01<br>(-0.13,<br>0.05)                     |
| log VL Day2<br>PostChal-<br>lenge<br>OPswab<br>Subgenomic    | 0.12<br>(-0.03,<br>0.21)                        | 0.07<br>(-0.06,<br>0.15)           | 0.07<br>(-0.06,<br>0.14)                                | 0.08<br>(-0.03,<br>0.13)                   | 0.04<br>(-0.11,<br>0.13)                                   | 0.03<br>(-0.14,<br>0.16)                      | 0.08<br>(-0.07,<br>0.18)                                   | 0.1<br>(-0.06,<br>0.2)                        |
| log VL Day2<br>PostChal-<br>lenge<br>NasalSwab<br>N1         | 0.42<br>(0.17,<br>0.63)                         | 0.33<br>(0.03,<br>0.56)            | 0.29<br>(0.08,<br>0.47)                                 | 0.21<br>(0.05,<br>0.35)                    | 0.29<br>(0.07,<br>0.49)                                    | 0.29<br>(0.04,<br>0.5)                        | 0.41<br>(0.11,<br>0.63)                                    | 0.37<br>(0.09,<br>0.59)                       |
| log VL Day2<br>PostChal-<br>lenge<br>NasalSwab<br>Subgenomic | 0.45<br>(0.2,<br>0.64)                          | 0.35<br>(0.07,<br>0.54)            | 0.28<br>(0.07,<br>0.42)                                 | 0.2<br>(0.04,<br>0.31)                     | 0.28<br>(0.08,<br>0.47)                                    | 0.28<br>(0.02,<br>0.53)                       | 0.41<br>(0.13,<br>0.61)                                    | 0.36<br>(0.11,<br>0.56)                       |

Table 6.8.11: RMAC using Moderna to predict Novavax

|                                                              | log<br>MN 2<br>weeks<br>prior<br>chal-<br>lenge | log<br>MN<br>day<br>chal-<br>lenge | log<br>MSD<br>ECL 2<br>weeks<br>prior<br>chal-<br>lenge | log<br>MSD<br>ECL<br>day<br>chal-<br>lenge | log<br>PsVNA<br>ID50 2<br>weeks<br>prior<br>chal-<br>lenge | log<br>PsVNA<br>ID50<br>day<br>chal-<br>lenge | log<br>PsVNA<br>ID80 2<br>weeks<br>prior<br>chal-<br>lenge | log<br>PsVNA<br>ID80<br>day<br>chal-<br>lenge |
|--------------------------------------------------------------|-------------------------------------------------|------------------------------------|---------------------------------------------------------|--------------------------------------------|------------------------------------------------------------|-----------------------------------------------|------------------------------------------------------------|-----------------------------------------------|
| AUC BAL<br>N1                                                | -0.37<br>(-0.69,<br>-0.12)                      | 0.21<br>(-0.29,<br>0.5)            | -0.03<br>(-0.53,<br>0.3)                                | -0.06<br>(-0.57,<br>0.26)                  | 0.16<br>(-0.31,<br>0.5)                                    | -0.25<br>(-0.66,<br>0.06)                     | 0.15<br>(-0.28,<br>0.51)                                   | -0.04<br>(-0.49,<br>0.22)                     |
| AUC BAL<br>Subgenomic                                        | -0.42<br>(-0.67,<br>-0.15)                      | 0.26<br>(-0.18,<br>0.63)           | -0.03<br>(-0.43,<br>0.39)                               | 0.04<br>(-0.4,<br>0.47)                    | -0.11<br>(-0.5,<br>0.29)                                   | -0.51<br>(-0.8,<br>-0.22)                     | -0.02<br>(-0.36,<br>0.43)                                  | -0.18<br>(-0.55,<br>0.19)                     |
| AUC Nasal<br>Swab N1                                         | 0.02<br>(-0.7,<br>0.38)                         | -0.09<br>(-0.68,<br>0.26)          | 0<br>(-0.66,<br>0.36)                                   | -0.01<br>(-0.68,<br>0.33)                  | 0.02<br>(-0.68,<br>0.4)                                    | 0.07<br>(-0.62,<br>0.43)                      | 0.22<br>(-0.6,<br>0.58)                                    | 0.2<br>(-0.51,<br>0.51)                       |
| AUC Nasal<br>Swab<br>Subgenomic                              | 0.19<br>(-0.68,<br>0.55)                        | 0<br>(-0.63,<br>0.37)              | 0.14<br>(-0.58,<br>0.52)                                | 0.06<br>(-0.63,<br>0.42)                   | 0.48<br>(-0.29,<br>0.75)                                   | 0.23<br>(-0.52,<br>0.57)                      | 0.65<br>(-0.16,<br>0.87)                                   | 0.5<br>(-0.24,<br>0.72)                       |
| AUC OP<br>Swab N1                                            | -0.03<br>(-0.59,<br>0.32)                       | 0.05<br>(-0.53,<br>0.39)           | 0.07<br>(-0.52,<br>0.41)                                | 0.05<br>(-0.56,<br>0.38)                   | 0.34<br>(-0.36,<br>0.64)                                   | 0.04<br>(-0.56,<br>0.39)                      | 0.39<br>(-0.34,<br>0.69)                                   | 0.29<br>(-0.32,<br>0.58)                      |
| AUC OP<br>Swab<br>Subgenomic                                 | -0.26<br>(-0.71,<br>0.1)                        | -0.32<br>(-0.76,<br>0.04)          | -0.14<br>(-0.65,<br>0.21)                               | -0.18<br>(-0.68,<br>0.17)                  | 0.15<br>(-0.52,<br>0.49)                                   | -0.29<br>(-0.76,<br>0.08)                     | 0.16<br>(-0.55,<br>0.49)                                   | -0.03<br>(-0.6,<br>0.31)                      |
| log VL Day2<br>PostChal-<br>lenge BAL<br>N1                  | -0.11<br>(-0.34,<br>0.04)                       | 0.25<br>(-0.11,<br>0.46)           | 0.03<br>(-0.28,<br>0.23)                                | 0.02<br>(-0.27,<br>0.2)                    | 0.16<br>(-0.17,<br>0.39)                                   | -0.01<br>(-0.29,<br>0.17)                     | 0.12<br>(-0.21,<br>0.34)                                   | 0.1<br>(-0.19,<br>0.26)                       |
| log VL Day2<br>PostChal-<br>lenge BAL<br>Subgenomic          | -0.15<br>(-0.57,<br>0.05)                       | 0.29<br>(-0.24,<br>0.53)           | 0.05<br>(-0.5,<br>0.29)                                 | 0.09<br>(-0.46,<br>0.29)                   | 0.23<br>(-0.19,<br>0.49)                                   | 0<br>(-0.47,<br>0.23)                         | 0.16<br>(-0.24,<br>0.42)                                   | 0.05<br>(-0.36,<br>0.23)                      |
| log VL Day2<br>PostChal-<br>lenge<br>OPswab N1               | -0.35<br>(-0.55,<br>-0.19)                      | -0.39<br>(-0.58,<br>-0.23)         | -0.35<br>(-0.55,<br>-0.18)                              | -0.36<br>(-0.55,<br>-0.2)                  | -0.35<br>(-0.55,<br>-0.19)                                 | -0.32<br>(-0.52,<br>-0.16)                    | -0.35<br>(-0.55,<br>-0.18)                                 | -0.33<br>(-0.52,<br>-0.17)                    |
| log VL Day2<br>PostChal-<br>lenge<br>OPswab<br>Subgenomic    | -0.35<br>(-0.67,<br>-0.11)                      | -0.39<br>(-0.7,<br>-0.15)          | -0.37<br>(-0.7,<br>-0.14)                               | -0.38<br>(-0.69,<br>-0.14)                 | -0.3<br>(-0.64,<br>-0.06)                                  | -0.23<br>(-0.6,<br>0.01)                      | -0.28<br>(-0.64,<br>-0.04)                                 | -0.23<br>(-0.59,<br>0)                        |
| log VL Day2<br>PostChal-<br>lenge<br>NasalSwab<br>N1         | 0.11<br>(-0.21,<br>0.36)                        | 0.07<br>(-0.24,<br>0.29)           | 0.17<br>(-0.11,<br>0.39)                                | 0.1<br>(-0.18,<br>0.31)                    | 0.26<br>(-0.06,<br>0.54)                                   | 0.19<br>(-0.1,<br>0.42)                       | 0.28<br>(-0.08,<br>0.59)                                   | 0.25<br>(-0.03,<br>0.46)                      |
| log VL Day2<br>PostChal-<br>lenge<br>NasalSwab<br>Subgenomic | 0.1<br>(-0.32,<br>0.36)                         | 0.01<br>(-0.4,<br>0.29)            | 0.15<br>(-0.25,<br>0.39)                                | 0.06<br>(-0.3,<br>0.29)                    | 0.23<br>(-0.2,<br>0.49)                                    | 0.15<br>(-0.27,<br>0.41)                      | 0.29<br>(-0.18,<br>0.57)                                   | 0.18<br>(-0.22,<br>0.43)                      |

Table 6.8.12: RMAC using Janssen to predict Sanofi

|                                                              | log<br>MN 2<br>weeks<br>prior<br>chal-<br>lenge | log<br>MN<br>day<br>chal-<br>lenge | log<br>MSD<br>ECL 2<br>weeks<br>prior<br>chal-<br>lenge | log<br>MSD<br>ECL<br>day<br>chal-<br>lenge | log<br>PsVNA<br>ID50 2<br>weeks<br>prior<br>chal-<br>lenge | log<br>PsVNA<br>ID50<br>day<br>chal-<br>lenge | log<br>PsVNA<br>ID80 2<br>weeks<br>prior<br>chal-<br>lenge | log<br>PsVNA<br>ID80<br>day<br>chal-<br>lenge |
|--------------------------------------------------------------|-------------------------------------------------|------------------------------------|---------------------------------------------------------|--------------------------------------------|------------------------------------------------------------|-----------------------------------------------|------------------------------------------------------------|-----------------------------------------------|
| AUC BAL<br>N1                                                | 0.23<br>(0.01,<br>0.42)                         | 0.43<br>(0.17,<br>0.66)            | 0.03<br>(-0.12,<br>0.12)                                | 0.1<br>(-0.09,<br>0.28)                    | 0.11<br>(-0.09,<br>0.32)                                   | 0.19<br>(-0.02,<br>0.39)                      | 0.13<br>(-0.07,<br>0.3)                                    | 0.17<br>(-0.03,<br>0.37)                      |
| AUC BAL<br>Subgenomic                                        | 0.13<br>(-0.08,<br>0.3)                         | 0.26<br>(0.04,<br>0.42)            | 0.01<br>(-0.12,<br>0.04)                                | 0.06<br>(-0.09,<br>0.17)                   | 0.06<br>(-0.11,<br>0.18)                                   | 0.07<br>(-0.1,<br>0.19)                       | 0.07<br>(-0.09,<br>0.2)                                    | 0.09<br>(-0.08,<br>0.21)                      |
| AUC Nasal<br>Swab N1                                         | 0.18<br>(-0.07,<br>0.29)                        | 0.15<br>(-0.06,<br>0.23)           | 0.11<br>(-0.16,<br>0.22)                                | 0.14<br>(-0.12,<br>0.25)                   | 0.18<br>(-0.1,<br>0.3)                                     | 0.21<br>(-0.14,<br>0.41)                      | 0.15<br>(-0.11,<br>0.26)                                   | 0.2<br>(-0.06,<br>0.31)                       |
| AUC Nasal<br>Swab<br>Subgenomic                              | 0.21<br>(-0.09,<br>0.49)                        | 0.28<br>(0.03,<br>0.48)            | 0.04<br>(-0.22,<br>0.26)                                | 0.09<br>(-0.18,<br>0.32)                   | 0.13<br>(-0.15,<br>0.37)                                   | 0.15<br>(-0.17,<br>0.42)                      | 0.11<br>(-0.16,<br>0.34)                                   | 0.2<br>(-0.09,<br>0.47)                       |
| AUC OP<br>Swab N1                                            | 0.01<br>(-0.1,<br>0.09)                         | 0.03<br>(-0.1,<br>0.2)             | 0.02<br>(-0.1,<br>0.16)                                 | 0.05<br>(-0.09,<br>0.21)                   | 0.03<br>(-0.09,<br>0.16)                                   | 0.03<br>(-0.13,<br>0.32)                      | 0.04<br>(-0.09,<br>0.19)                                   | 0.07<br>(-0.06,<br>0.27)                      |
| AUC OP<br>Swab<br>Subgenomic                                 | -0.02<br>(-0.12,<br>0.19)                       | -0.03<br>(-0.14,<br>0.26)          | -0.03<br>(-0.15,<br>0.15)                               | -0.01<br>(-0.13,<br>0.23)                  | -0.02<br>(-0.13,<br>0.19)                                  | -0.05<br>(-0.16,<br>0.2)                      | -0.02<br>(-0.13,<br>0.21)                                  | -0.02<br>(-0.13,<br>0.19)                     |
| log VL Day2<br>PostChal-<br>lenge BAL<br>N1                  | 0.17<br>(-0.13,<br>0.35)                        | 0.26<br>(0.02,<br>0.41)            | -0.02<br>(-0.2,<br>0.02)                                | 0.04<br>(-0.17,<br>0.13)                   | 0.11<br>(-0.21,<br>0.33)                                   | 0.08<br>(-0.24,<br>0.28)                      | 0.08<br>(-0.17,<br>0.24)                                   | 0.14<br>(-0.14,<br>0.3)                       |
| log VL Day2<br>PostChal-<br>lenge BAL<br>Subgenomic          | 0.17<br>(-0.06,<br>0.31)                        | 0.21<br>(0.03,<br>0.34)            | 0.01<br>(-0.11,<br>0.02)                                | 0.06<br>(-0.1,<br>0.13)                    | 0.1<br>(-0.12,<br>0.23)                                    | 0.1<br>(-0.16,<br>0.28)                       | 0.11<br>(-0.09,<br>0.22)                                   | 0.12<br>(-0.07,<br>0.23)                      |
| log VL Day2<br>PostChal-<br>lenge<br>OPswab N1               | 0.3<br>(-0.08,<br>0.52)                         | 0.09<br>(-0.17,<br>0.26)           | -0.02<br>(-0.4,<br>0.2)                                 | 0.08<br>(-0.29,<br>0.31)                   | 0.09<br>(-0.27,<br>0.31)                                   | 0.06<br>(-0.28,<br>0.26)                      | 0.13<br>(-0.24,<br>0.33)                                   | 0.15<br>(-0.15,<br>0.31)                      |
| log VL Day2<br>PostChal-<br>lenge<br>OPswab<br>Subgenomic    | 0.32<br>(-0.02,<br>0.53)                        | 0.14<br>(-0.14,<br>0.33)           | 0.06<br>(-0.31,<br>0.3)                                 | 0.17<br>(-0.21,<br>0.42)                   | 0.16<br>(-0.2,<br>0.38)                                    | 0.15<br>(-0.2,<br>0.36)                       | 0.18<br>(-0.15,<br>0.38)                                   | 0.2<br>(-0.09,<br>0.36)                       |
| log VL Day2<br>PostChal-<br>lenge<br>NasalSwab<br>N1         | 0.44<br>(0.07,<br>0.67)                         | 0.47<br>(0.2,<br>0.64)             | 0.18<br>(-0.2,<br>0.43)                                 | 0.31<br>(-0.02,<br>0.54)                   | 0.31<br>(-0.11,<br>0.62)                                   | 0.21<br>(-0.18,<br>0.5)                       | 0.26<br>(-0.1,<br>0.55)                                    | 0.49<br>(0.13,<br>0.7)                        |
| log VL Day2<br>PostChal-<br>lenge<br>NasalSwab<br>Subgenomic | 0.42<br>(0.03,<br>0.66)                         | 0.47<br>(0.2,<br>0.62)             | 0.12<br>(-0.29,<br>0.35)                                | 0.26<br>(-0.1,<br>0.5)                     | 0.28<br>(-0.17,<br>0.58)                                   | 0.2<br>(-0.21,<br>0.48)                       | 0.23<br>(-0.14,<br>0.49)                                   | 0.46<br>(0.07,<br>0.67)                       |

Table 6.8.13: RMAC using Janssen to predict Moderna

|                                                              | log<br>MN 2<br>weeks<br>prior<br>chal-<br>lenge | log<br>MN<br>day<br>chal-<br>lenge | log<br>MSD<br>ECL 2<br>weeks<br>prior<br>chal-<br>lenge | log<br>MSD<br>ECL<br>day<br>chal-<br>lenge | log<br>PsVNA<br>ID50 2<br>weeks<br>prior<br>chal-<br>lenge | log<br>PsVNA<br>ID50<br>day<br>chal-<br>lenge | log<br>PsVNA<br>ID80 2<br>weeks<br>prior<br>chal-<br>lenge | log<br>PsVNA<br>ID80<br>day<br>chal-<br>lenge |
|--------------------------------------------------------------|-------------------------------------------------|------------------------------------|---------------------------------------------------------|--------------------------------------------|------------------------------------------------------------|-----------------------------------------------|------------------------------------------------------------|-----------------------------------------------|
| AUC BAL<br>N1                                                | 0.09<br>(-0.16,<br>0.28)                        | 0.31<br>(0,<br>0.54)               | 0.02<br>(-0.17,<br>0.15)                                | 0.21<br>(-0.04,<br>0.41)                   | 0.05<br>(-0.19,<br>0.25)                                   | 0.02<br>(-0.23,<br>0.22)                      | 0.06<br>(-0.18,<br>0.24)                                   | 0.07<br>(-0.18,<br>0.25)                      |
| AUC BAL<br>Subgenomic                                        | 0.06<br>(-0.13,<br>0.22)                        | 0.18<br>(-0.04,<br>0.33)           | -0.02<br>(-0.17,<br>0.04)                               | 0.14<br>(-0.05,<br>0.29)                   | 0.01<br>(-0.17,<br>0.15)                                   | -0.01<br>(-0.19,<br>0.11)                     | 0.03<br>(-0.15,<br>0.16)                                   | 0.03<br>(-0.15,<br>0.15)                      |
| AUC Nasal<br>Swab N1                                         | -0.01<br>(-0.28,<br>0.16)                       | -0.07<br>(-0.33,<br>0.09)          | 0.02<br>(-0.26,<br>0.17)                                | 0.1<br>(-0.16,<br>0.26)                    | -0.07<br>(-0.35,<br>0.09)                                  | -0.04<br>(-0.33,<br>0.15)                     | -0.05<br>(-0.31,<br>0.12)                                  | -0.02<br>(-0.29,<br>0.14)                     |
| AUC Nasal<br>Swab<br>Subgenomic                              | 0.23<br>(-0.05,<br>0.44)                        | 0.16<br>(-0.1,<br>0.35)            | 0.17<br>(-0.09,<br>0.36)                                | 0.27<br>(0.02,<br>0.47)                    | 0.09<br>(-0.17,<br>0.25)                                   | 0.06<br>(-0.22,<br>0.25)                      | 0.14<br>(-0.13,<br>0.31)                                   | 0.17<br>(-0.09,<br>0.33)                      |
| AUC OP<br>Swab N1                                            | -0.03<br>(-0.27,<br>0.09)                       | 0.06<br>(-0.2,<br>0.21)            | 0.09<br>(-0.18,<br>0.26)                                | 0.22<br>(-0.07,<br>0.41)                   | 0.02<br>(-0.25,<br>0.18)                                   | 0.04<br>(-0.28,<br>0.26)                      | 0.06<br>(-0.22,<br>0.23)                                   | 0.12<br>(-0.18,<br>0.32)                      |
| AUC OP<br>Swab<br>Subgenomic                                 | 0<br>(-0.25,<br>0.18)                           | 0.02<br>(-0.25,<br>0.2)            | 0.06<br>(-0.23,<br>0.27)                                | 0.19<br>(-0.13,<br>0.42)                   | 0<br>(-0.27,<br>0.22)                                      | -0.07<br>(-0.34,<br>0.14)                     | 0.01<br>(-0.26,<br>0.23)                                   | -0.01<br>(-0.27,<br>0.19)                     |
| log VL Day2<br>PostChal-<br>lenge BAL<br>N1                  | 0.13<br>(-0.12,<br>0.26)                        | 0.29<br>(0.01,<br>0.45)            | 0.01<br>(-0.1,<br>0.02)                                 | 0.13<br>(-0.07,<br>0.23)                   | 0.22<br>(-0.01,<br>0.36)                                   | 0.14<br>(-0.07,<br>0.26)                      | 0.17<br>(-0.02,<br>0.27)                                   | 0.15<br>(-0.03,<br>0.24)                      |
| log VL Day2<br>PostChal-<br>lenge BAL<br>Subgenomic          | 0.19<br>(-0.05,<br>0.34)                        | 0.3<br>(0.04,<br>0.45)             | 0.01<br>(-0.11,<br>0.02)                                | 0.19<br>(-0.03,<br>0.3)                    | 0.22<br>(0.04,<br>0.34)                                    | 0.19<br>(-0.04,<br>0.33)                      | 0.21<br>(0.02,<br>0.31)                                    | 0.18<br>(0,<br>0.28)                          |
| log VL Day2<br>PostChal-<br>lenge<br>OPswab N1               | 0<br>(-0.37,<br>0.3)                            | -0.03<br>(-0.36,<br>0.21)          | 0.01<br>(-0.41,<br>0.36)                                | 0.06<br>(-0.41,<br>0.46)                   | -0.1<br>(-0.46,<br>0.24)                                   | -0.05<br>(-0.32,<br>0.15)                     | -0.07<br>(-0.42,<br>0.21)                                  | 0 (-0.3,<br>0.25)                             |
| log VL Day2<br>PostChal-<br>lenge<br>OPswab<br>Subgenomic    | 0.18<br>(-0.2,<br>0.45)                         | 0.13<br>(-0.21,<br>0.35)           | 0.16<br>(-0.26,<br>0.46)                                | 0.21<br>(-0.22,<br>0.57)                   | 0.08<br>(-0.31,<br>0.37)                                   | 0.11<br>(-0.19,<br>0.3)                       | 0.1<br>(-0.28,<br>0.36)                                    | 0.16<br>(-0.16,<br>0.38)                      |
| log VL Day2<br>PostChal-<br>lenge<br>NasalSwab<br>N1         | 0.65<br>(0.34,<br>0.83)                         | 0.57<br>(0.32,<br>0.73)            | 0.69<br>(0.42,<br>0.85)                                 | 0.65<br>(0.39,<br>0.8)                     | 0.55<br>(0.26,<br>0.75)                                    | 0.52<br>(0.21,<br>0.73)                       | 0.62<br>(0.32,<br>0.8)                                     | 0.6<br>(0.31,<br>0.78)                        |
| log VL Day2<br>PostChal-<br>lenge<br>NasalSwab<br>Subgenomic | 0.57<br>(0.27,<br>0.77)                         | 0.46<br>(0.15,<br>0.68)            | 0.55<br>(0.3,<br>0.74)                                  | 0.51<br>(0.22,<br>0.72)                    | 0.45<br>(0.11,<br>0.69)                                    | 0.45<br>(0.1,<br>0.69)                        | 0.51<br>(0.22,<br>0.71)                                    | 0.45<br>(0.11,<br>0.71)                       |

Table 6.8.14: RMAC using Janssen to predict Novavax

|                                                              | log<br>MN 2<br>weeks<br>prior<br>chal-<br>lenge | log<br>MN<br>day<br>chal-<br>lenge | log<br>MSD<br>ECL 2<br>weeks<br>prior<br>chal-<br>lenge | log<br>MSD<br>ECL<br>day<br>chal-<br>lenge | log<br>PsVNA<br>ID50 2<br>weeks<br>prior<br>chal-<br>lenge | log<br>PsVNA<br>ID50<br>day<br>chal-<br>lenge | log<br>PsVNA<br>ID80 2<br>weeks<br>prior<br>chal-<br>lenge | log<br>PsVNA<br>ID80<br>day<br>chal-<br>lenge |
|--------------------------------------------------------------|-------------------------------------------------|------------------------------------|---------------------------------------------------------|--------------------------------------------|------------------------------------------------------------|-----------------------------------------------|------------------------------------------------------------|-----------------------------------------------|
| AUC BAL<br>N1                                                | -0.2<br>(-0.61,<br>0)                           | 0.15<br>(-0.36,<br>0.37)           | -0.34<br>(-0.77,<br>-0.06)                              | -0.13<br>(-0.64,<br>0.13)                  | 0.09<br>(-0.4,<br>0.29)                                    | 0.05<br>(-0.41,<br>0.22)                      | -0.01<br>(-0.51,<br>0.21)                                  | -0.09<br>(-0.58,<br>0.12)                     |
| AUC BAL<br>Subgenomic                                        | -0.35<br>(-0.74,<br>-0.09)                      | -0.11<br>(-0.61,<br>0.22)          | -0.58<br>(-0.87,<br>-0.32)                              | -0.31<br>(-0.75,<br>0.02)                  | -0.16<br>(-0.63,<br>0.13)                                  | -0.25<br>(-0.7,<br>0.03)                      | -0.22<br>(-0.68,<br>0.07)                                  | -0.31<br>(-0.74,<br>-0.02)                    |
| AUC Nasal<br>Swab N1                                         | -0.16<br>(-0.74,<br>0.11)                       | -0.25<br>(-0.76,<br>0.03)          | -0.15<br>(-0.71,<br>0.11)                               | -0.15<br>(-0.72,<br>0.12)                  | -0.05<br>(-0.66,<br>0.19)                                  | 0.03<br>(-0.59,<br>0.25)                      | -0.08<br>(-0.69,<br>0.18)                                  | -0.11<br>(-0.69,<br>0.14)                     |
| AUC Nasal<br>Swab<br>Subgenomic                              | 0.15<br>(-0.59,<br>0.4)                         | -0.01<br>(-0.63,<br>0.27)          | -0.01<br>(-0.63,<br>0.27)                               | 0.02<br>(-0.62,<br>0.29)                   | 0.25<br>(-0.43,<br>0.45)                                   | 0.28<br>(-0.38,<br>0.46)                      | 0.25<br>(-0.48,<br>0.48)                                   | 0.23<br>(-0.45,<br>0.43)                      |
| AUC OP<br>Swab N1                                            | -0.37<br>(-0.75,<br>-0.09)                      | -0.26<br>(-0.7,<br>0.01)           | -0.19<br>(-0.65,<br>0.09)                               | -0.12<br>(-0.63,<br>0.15)                  | -0.17<br>(-0.67,<br>0.11)                                  | 0.02<br>(-0.52,<br>0.29)                      | -0.11<br>(-0.63,<br>0.18)                                  | -0.03<br>(-0.55,<br>0.23)                     |
| AUC OP<br>Swab<br>Subgenomic                                 | -0.19<br>(-0.63,<br>0.09)                       | -0.18<br>(-0.66,<br>0.12)          | -0.02<br>(-0.52,<br>0.25)                               | 0.08<br>(-0.46,<br>0.35)                   | 0.08<br>(-0.46,<br>0.34)                                   | -0.14<br>(-0.62,<br>0.13)                     | 0.1<br>(-0.48,<br>0.37)                                    | -0.12<br>(-0.61,<br>0.14)                     |
| log VL Day2<br>PostChal-<br>lenge BAL<br>N1                  | -0.2<br>(-0.43,<br>-0.03)                       | -0.06<br>(-0.37,<br>0.16)          | -0.39<br>(-0.6,<br>-0.21)                               | -0.27<br>(-0.51,<br>-0.07)                 | 0.07<br>(-0.22,<br>0.27)                                   | -0.05<br>(-0.32,<br>0.12)                     | -0.08<br>(-0.36,<br>0.12)                                  | -0.14<br>(-0.4,<br>0.04)                      |
| log VL Day2<br>PostChal-<br>lenge BAL<br>Subgenomic          | -0.32<br>(-0.75,<br>-0.06)                      | -0.17<br>(-0.71,<br>0.15)          | -0.54<br>(-0.88,<br>-0.26)                              | -0.38<br>(-0.83,<br>-0.07)                 | -0.12<br>(-0.66,<br>0.14)                                  | -0.11<br>(-0.63,<br>0.12)                     | -0.18<br>(-0.7,<br>0.09)                                   | -0.28<br>(-0.76,<br>-0.01)                    |
| log VL Day2<br>PostChal-<br>lenge<br>OPswab N1               | 0.14<br>(-0.06,<br>0.32)                        | 0.01<br>(-0.23,<br>0.19)           | 0.26<br>(0.03,<br>0.44)                                 | 0.34<br>(0.07,<br>0.53)                    | 0.18<br>(-0.11,<br>0.43)                                   | 0.09<br>(-0.11,<br>0.26)                      | 0.16<br>(-0.09,<br>0.38)                                   | 0.09<br>(-0.13,<br>0.26)                      |
| log VL Day2<br>PostChal-<br>lenge<br>OPswab<br>Subgenomic    | 0.19<br>(-0.17,<br>0.43)                        | -0.06<br>(-0.45,<br>0.2)           | 0.35<br>(0,<br>0.57)                                    | 0.45<br>(0.09,<br>0.69)                    | 0.32<br>(-0.07,<br>0.62)                                   | 0.07<br>(-0.32,<br>0.29)                      | 0.27<br>(-0.13,<br>0.54)                                   | 0.12<br>(-0.25,<br>0.34)                      |
| log VL Day2<br>PostChal-<br>lenge<br>NasalSwab<br>N1         | 0.25<br>(-0.07,<br>0.48)                        | 0.05<br>(-0.26,<br>0.28)           | 0.26<br>(0,<br>0.47)                                    | 0.2<br>(-0.08,<br>0.43)                    | 0.38<br>(-0.02,<br>0.67)                                   | 0.35<br>(-0.04,<br>0.62)                      | 0.35<br>(-0.02,<br>0.63)                                   | 0.3<br>(0.02,<br>0.52)                        |
| log VL Day2<br>PostChal-<br>lenge<br>NasalSwab<br>Subgenomic | 0.24<br>(-0.18,<br>0.49)                        | 0<br>(-0.42,<br>0.29)              | 0.21<br>(-0.18,<br>0.43)                                | 0.18<br>(-0.21,<br>0.42)                   | 0.37<br>(-0.11,<br>0.68)                                   | 0.28<br>(-0.14,<br>0.54)                      | 0.36<br>(-0.11,<br>0.65)                                   | 0.25<br>(-0.16,<br>0.52)                      |

Table 6.8.15: RMAC using Novavax to predict Sanofi

|                                                              | log<br>MN 2<br>weeks<br>prior<br>chal-<br>lenge | log<br>MN<br>day<br>chal-<br>lenge | log<br>MSD<br>ECL 2<br>weeks<br>prior<br>chal-<br>lenge | log<br>MSD<br>ECL<br>day<br>chal-<br>lenge | log<br>PsVNA<br>ID50 2<br>weeks<br>prior<br>chal-<br>lenge | log<br>PsVNA<br>ID50<br>day<br>chal-<br>lenge | log<br>PsVNA<br>ID80 2<br>weeks<br>prior<br>chal-<br>lenge | log<br>PsVNA<br>ID80<br>day<br>chal-<br>lenge |
|--------------------------------------------------------------|-------------------------------------------------|------------------------------------|---------------------------------------------------------|--------------------------------------------|------------------------------------------------------------|-----------------------------------------------|------------------------------------------------------------|-----------------------------------------------|
| AUC BAL<br>N1                                                | -0.23<br>(-0.42,<br>-0.08)                      | 0.28<br>(-0.01,<br>0.55)           | -0.08<br>(-0.28,<br>0.11)                               | -0.1<br>(-0.31,<br>0.1)                    | -0.02<br>(-0.24,<br>0.19)                                  | -0.05<br>(-0.25,<br>0.13)                     | -0.06<br>(-0.28,<br>0.12)                                  | -0.04<br>(-0.28,<br>0.16)                     |
| AUC BAL<br>Subgenomic                                        | -0.29<br>(-0.46,<br>-0.16)                      | -0.03<br>(-0.23,<br>0.14)          | -0.18<br>(-0.36,<br>-0.03)                              | -0.16<br>(-0.33,<br>0)                     | -0.17<br>(-0.35,<br>-0.02)                                 | -0.21<br>(-0.38,<br>-0.07)                    | -0.2<br>(-0.37,<br>-0.06)                                  | -0.22<br>(-0.39,<br>-0.08)                    |
| AUC Nasal<br>Swab N1                                         | 0.42<br>(0.17,<br>0.61)                         | 0.6<br>(0.32,<br>0.77)             | 0.53<br>(0.14,<br>0.78)                                 | 0.55<br>(0.25,<br>0.75)                    | 0.61<br>(0.29,<br>0.8)                                     | 0.53<br>(0.15,<br>0.74)                       | 0.54<br>(0.25,<br>0.72)                                    | 0.59<br>(0.31,<br>0.76)                       |
| AUC Nasal<br>Swab<br>Subgenomic                              | 0.5<br>(0.15,<br>0.71)                          | 0.41<br>(0.1,<br>0.66)             | 0.31<br>(-0.08,<br>0.64)                                | 0.4<br>(0.02,<br>0.69)                     | 0.47<br>(0.15,<br>0.76)                                    | 0.48<br>(0.08,<br>0.77)                       | 0.44<br>(0.14,<br>0.69)                                    | 0.55<br>(0.24,<br>0.78)                       |
| AUC OP<br>Swab N1                                            | 0.3<br>(0.08,<br>0.66)                          | 0.11<br>(-0.13,<br>0.58)           | 0.24<br>(0.04,<br>0.6)                                  | 0.29<br>(0.08,<br>0.63)                    | 0.19<br>(0.02,<br>0.51)                                    | 0.12<br>(-0.14,<br>0.61)                      | 0.19<br>(0,<br>0.54)                                       | 0.26<br>(0.06,<br>0.6)                        |
| AUC OP<br>Swab<br>Subgenomic                                 | 0.01<br>(-0.13,<br>0.33)                        | -0.11<br>(-0.26,<br>0.12)          | 0.01<br>(-0.12,<br>0.31)                                | 0.05<br>(-0.09,<br>0.42)                   | -0.02<br>(-0.18,<br>0.19)                                  | -0.1<br>(-0.23,<br>0.23)                      | -0.02<br>(-0.15,<br>0.26)                                  | -0.01<br>(-0.15,<br>0.26)                     |
| log VL Day2<br>PostChal-<br>lenge BAL<br>N1                  | -0.34<br>(-0.62,<br>-0.11)                      | -0.03<br>(-0.35,<br>0.22)          | -0.19<br>(-0.48,<br>0.05)                               | -0.28<br>(-0.55,<br>-0.07)                 | -0.23<br>(-0.53,<br>0.02)                                  | -0.35<br>(-0.61,<br>-0.13)                    | -0.3<br>(-0.56,<br>-0.08)                                  | -0.27<br>(-0.56,<br>-0.02)                    |
| log VL Day2<br>PostChal-<br>lenge BAL<br>Subgenomic          | -0.35<br>(-0.6,<br>-0.17)                       | -0.03<br>(-0.31,<br>0.19)          | -0.17<br>(-0.44,<br>0.04)                               | -0.15<br>(-0.43,<br>0.06)                  | -0.17<br>(-0.44,<br>0.03)                                  | -0.27<br>(-0.52,<br>-0.08)                    | -0.22<br>(-0.47,<br>-0.03)                                 | -0.27<br>(-0.52,<br>-0.08)                    |
| log VL Day2<br>PostChal-<br>lenge<br>OPswab N1               | 0.28<br>(-0.13,<br>0.53)                        | -0.11<br>(-0.46,<br>0.11)          | 0.08<br>(-0.3,<br>0.33)                                 | 0.19<br>(-0.17,<br>0.43)                   | 0<br>(-0.35,<br>0.19)                                      | 0.04<br>(-0.33,<br>0.28)                      | 0.04<br>(-0.33,<br>0.26)                                   | 0.13<br>(-0.23,<br>0.33)                      |
| log VL Day2<br>PostChal-<br>lenge<br>OPswab<br>Subgenomic    | 0.26<br>(-0.13,<br>0.5)                         | -0.13<br>(-0.48,<br>0.09)          | 0.07<br>(-0.32,<br>0.35)                                | 0.18<br>(-0.21,<br>0.44)                   | 0.09<br>(-0.26,<br>0.3)                                    | 0.02<br>(-0.37,<br>0.29)                      | 0.11<br>(-0.25,<br>0.34)                                   | 0.15<br>(-0.2,<br>0.37)                       |
| log VL Day2<br>PostChal-<br>lenge<br>NasalSwab<br>N1         | 0.44<br>(0.14,<br>0.62)                         | 0.18<br>(-0.25,<br>0.46)           | 0.39<br>(0.04,<br>0.63)                                 | 0.43<br>(0.12,<br>0.62)                    | 0.49<br>(0.16,<br>0.68)                                    | 0.37<br>(0.01,<br>0.6)                        | 0.38<br>(0.07,<br>0.62)                                    | 0.55<br>(0.28,<br>0.7)                        |
| log VL Day2<br>PostChal-<br>lenge<br>NasalSwab<br>Subgenomic | 0.35<br>(-0.07,<br>0.64)                        | -0.25<br>(-0.65,<br>0.04)          | 0.16<br>(-0.23,<br>0.44)                                | 0.29<br>(-0.07,<br>0.54)                   | 0.3<br>(-0.14,<br>0.56)                                    | 0.27<br>(-0.12,<br>0.55)                      | 0.22<br>(-0.15,<br>0.48)                                   | 0.36<br>(-0.09,<br>0.62)                      |

Table 6.8.16: RMAC using Novavax to predict Moderna

|                                                              | log<br>MN 2<br>weeks<br>prior<br>chal-<br>lenge | log<br>MN<br>day<br>chal-<br>lenge | log<br>MSD<br>ECL 2<br>weeks<br>prior<br>chal-<br>lenge | log<br>MSD<br>ECL<br>day<br>chal-<br>lenge | log<br>PsVNA<br>ID50 2<br>weeks<br>prior<br>chal-<br>lenge | log<br>PsVNA<br>ID50<br>day<br>chal-<br>lenge | log<br>PsVNA<br>ID80 2<br>weeks<br>prior<br>chal-<br>lenge | log<br>PsVNA<br>ID80<br>day<br>chal-<br>lenge |
|--------------------------------------------------------------|-------------------------------------------------|------------------------------------|---------------------------------------------------------|--------------------------------------------|------------------------------------------------------------|-----------------------------------------------|------------------------------------------------------------|-----------------------------------------------|
| AUC BAL<br>N1                                                | -0.22<br>(-0.44,<br>-0.05)                      | 0.21<br>(-0.13,<br>0.48)           | 0.14<br>(-0.15,<br>0.42)                                | 0.15<br>(-0.15,<br>0.42)                   | -0.04<br>(-0.29,<br>0.18)                                  | -0.12<br>(-0.37,<br>0.09)                     | -0.07<br>(-0.32,<br>0.14)                                  | -0.07<br>(-0.33,<br>0.14)                     |
| AUC BAL<br>Subgenomic                                        | -0.24<br>(-0.41,<br>-0.12)                      | -0.04<br>(-0.24,<br>0.12)          | -0.07<br>(-0.26,<br>0.1)                                | -0.02<br>(-0.23,<br>0.16)                  | -0.15<br>(-0.34,<br>-0.01)                                 | -0.19<br>(-0.36,<br>-0.06)                    | -0.18<br>(-0.35,<br>-0.04)                                 | -0.19<br>(-0.37,<br>-0.06)                    |
| AUC Nasal<br>Swab N1                                         | 0.57<br>(0.3,<br>0.72)                          | 0.41<br>(0.07,<br>0.65)            | 0.62<br>(0.4,<br>0.73)                                  | 0.56<br>(0.38,<br>0.67)                    | 0.39<br>(0.09,<br>0.6)                                     | 0.5<br>(0.17,<br>0.71)                        | 0.54<br>(0.25,<br>0.73)                                    | 0.57<br>(0.27,<br>0.76)                       |
| AUC Nasal<br>Swab<br>Subgenomic                              | 0.66<br>(0.39,<br>0.81)                         | 0.3<br>(-0.02,<br>0.55)            | 0.66<br>(0.45,<br>0.78)                                 | 0.6<br>(0.42,<br>0.73)                     | 0.49<br>(0.25,<br>0.64)                                    | 0.45<br>(0.13,<br>0.66)                       | 0.62<br>(0.36,<br>0.77)                                    | 0.59<br>(0.32,<br>0.76)                       |
| AUC OP<br>Swab N1                                            | 0.51<br>(0.16,<br>0.73)                         | 0.33<br>(-0.06,<br>0.62)           | 0.61<br>(0.27,<br>0.81)                                 | 0.6<br>(0.3,<br>0.77)                      | 0.36<br>(0, 0.6)                                           | 0.3<br>(-0.14,<br>0.63)                       | 0.42<br>(0.08,<br>0.67)                                    | 0.48<br>(0.1,<br>0.73)                        |
| AUC OP<br>Swab<br>Subgenomic                                 | 0.11<br>(-0.22,<br>0.38)                        | -0.12<br>(-0.41,<br>0.12)          | 0.36<br>(-0.05,<br>0.65)                                | 0.46<br>(0.05,<br>0.73)                    | 0<br>(-0.29,<br>0.26)                                      | -0.09<br>(-0.43,<br>0.21)                     | 0.05<br>(-0.26,<br>0.32)                                   | 0.05<br>(-0.29,<br>0.35)                      |
| log VL Day2<br>PostChal-<br>lenge BAL<br>N1                  | -0.06<br>(-0.3,<br>0.09)                        | 0.28<br>(-0.03,<br>0.46)           | 0.27<br>(-0.12,<br>0.51)                                | 0.22<br>(-0.11,<br>0.41)                   | 0.06<br>(-0.2,<br>0.22)                                    | -0.05<br>(-0.29,<br>0.11)                     | 0.02<br>(-0.21,<br>0.17)                                   | 0.03<br>(-0.21,<br>0.18)                      |
| log VL Day2<br>PostChal-<br>lenge BAL<br>Subgenomic          | -0.22<br>(-0.43,<br>-0.08)                      | 0.2<br>(-0.08,<br>0.38)            | 0.17<br>(-0.12,<br>0.38)                                | 0.26<br>(-0.06,<br>0.47)                   | 0.02<br>(-0.22,<br>0.2)                                    | -0.11<br>(-0.35,<br>0.05)                     | -0.04<br>(-0.27,<br>0.12)                                  | -0.11<br>(-0.33,<br>0.05)                     |
| log VL Day2<br>PostChal-<br>lenge<br>OPswab N1               | -0.03<br>(-0.41,<br>0.28)                       | -0.26<br>(-0.57,<br>-0.02)         | 0.08<br>(-0.36,<br>0.46)                                | 0.06<br>(-0.39,<br>0.47)                   | -0.17<br>(-0.5,<br>0.11)                                   | -0.08<br>(-0.37,<br>0.15)                     | -0.16<br>(-0.48,<br>0.11)                                  | -0.04<br>(-0.37,<br>0.25)                     |
| log VL Day2<br>PostChal-<br>lenge<br>OPswab<br>Subgenomic    | 0.11<br>(-0.3,<br>0.41)                         | -0.21<br>(-0.55,<br>0.05)          | 0.19<br>(-0.25,<br>0.5)                                 | 0.2<br>(-0.22,<br>0.57)                    | 0<br>(-0.37,<br>0.28)                                      | -0.03<br>(-0.37,<br>0.2)                      | 0.02<br>(-0.36,<br>0.29)                                   | 0.11<br>(-0.27,<br>0.37)                      |
| log VL Day2<br>PostChal-<br>lenge<br>NasalSwab<br>N1         | 0.62<br>(0.35,<br>0.81)                         | 0.43<br>(0.11,<br>0.64)            | 0.53<br>(0.35,<br>0.68)                                 | 0.4<br>(0.17,<br>0.59)                     | 0.64<br>(0.37,<br>0.82)                                    | 0.58<br>(0.27,<br>0.78)                       | 0.7<br>(0.42,<br>0.86)                                     | 0.55<br>(0.22,<br>0.76)                       |
| log VL Day2<br>PostChal-<br>lenge<br>NasalSwab<br>Subgenomic | 0.57<br>(0.24,<br>0.77)                         | 0.03<br>(-0.33,<br>0.26)           | 0.6<br>(0.39,<br>0.72)                                  | 0.48<br>(0.22,<br>0.66)                    | 0.43<br>(0.11,<br>0.67)                                    | 0.51<br>(0.13,<br>0.76)                       | 0.5<br>(0.22,<br>0.71)                                     | 0.45<br>(0.1,<br>0.7)                         |

Table 6.8.17: RMAC using Novavax to predict Janssen

|                                                              | log<br>MN 2<br>weeks<br>prior<br>chal-<br>lenge | log<br>MN<br>day<br>chal-<br>lenge | log<br>MSD<br>ECL 2<br>weeks<br>prior<br>chal-<br>lenge | log<br>MSD<br>ECL<br>day<br>chal-<br>lenge | log<br>PsVNA<br>ID50 2<br>weeks<br>prior<br>chal-<br>lenge | log<br>PsVNA<br>ID50<br>day<br>chal-<br>lenge | log<br>PsVNA<br>ID80 2<br>weeks<br>prior<br>chal-<br>lenge | log<br>PsVNA<br>ID80<br>day<br>chal-<br>lenge |
|--------------------------------------------------------------|-------------------------------------------------|------------------------------------|---------------------------------------------------------|--------------------------------------------|------------------------------------------------------------|-----------------------------------------------|------------------------------------------------------------|-----------------------------------------------|
| AUC BAL<br>N1                                                | -0.22<br>(-0.45,<br>-0.05)                      | 0.28<br>(-0.06,<br>0.53)           | 0.04<br>(-0.25,<br>0.27)                                | 0.03<br>(-0.22,<br>0.22)                   | 0.06<br>(-0.22,<br>0.27)                                   | 0.01<br>(-0.25,<br>0.21)                      | 0.03<br>(-0.25,<br>0.26)                                   | 0<br>(-0.25,<br>0.21)                         |
| AUC BAL<br>Subgenomic                                        | -0.31<br>(-0.48,<br>-0.17)                      | -0.06<br>(-0.28,<br>0.12)          | -0.15<br>(-0.34,<br>-0.01)                              | -0.12<br>(-0.32,<br>0.03)                  | -0.15<br>(-0.35,<br>0)                                     | -0.21<br>(-0.4,<br>-0.06)                     | -0.19<br>(-0.39,<br>-0.05)                                 | -0.22<br>(-0.42,<br>-0.08)                    |
| AUC Nasal<br>Swab N1                                         | -0.04<br>(-0.37,<br>0.26)                       | 0.15<br>(-0.28,<br>0.53)           | -0.05<br>(-0.35,<br>0.24)                               | 0.01<br>(-0.29,<br>0.25)                   | -0.04<br>(-0.37,<br>0.26)                                  | -0.13<br>(-0.5,<br>0.22)                      | 0<br>(-0.36,<br>0.33)                                      | -0.02<br>(-0.39,<br>0.32)                     |
| AUC Nasal<br>Swab<br>Subgenomic                              | 0.28<br>(-0.1,<br>0.55)                         | 0.32<br>(-0.11,<br>0.66)           | 0.14<br>(-0.16,<br>0.43)                                | 0.17<br>(-0.11,<br>0.44)                   | 0.07<br>(-0.22,<br>0.33)                                   | 0.06<br>(-0.34,<br>0.41)                      | 0.17<br>(-0.19,<br>0.47)                                   | 0.21<br>(-0.21,<br>0.53)                      |
| AUC OP<br>Swab N1                                            | 0.06<br>(-0.35,<br>0.47)                        | 0.11<br>(-0.23,<br>0.49)           | 0.07<br>(-0.22,<br>0.36)                                | 0.12<br>(-0.16,<br>0.41)                   | 0.07<br>(-0.21,<br>0.32)                                   | 0.13<br>(-0.15,<br>0.38)                      | 0.14<br>(-0.19,<br>0.43)                                   | 0.2<br>(-0.15,<br>0.52)                       |
| AUC OP<br>Swab<br>Subgenomic                                 | 0.17<br>(-0.12,<br>0.4)                         | 0<br>(-0.27,<br>0.2)               | 0.21<br>(-0.03,<br>0.42)                                | 0.25<br>(0,<br>0.45)                       | 0.11<br>(-0.15,<br>0.31)                                   | 0.07<br>(-0.17,<br>0.24)                      | 0.2<br>(-0.08,<br>0.41)                                    | 0.14<br>(-0.13,<br>0.35)                      |
| log VL Day2<br>PostChal-<br>lenge BAL<br>N1                  | -0.17<br>(-0.46,<br>0.02)                       | 0.04<br>(-0.27,<br>0.26)           | -0.03<br>(-0.34,<br>0.18)                               | -0.09<br>(-0.39,<br>0.11)                  | -0.04<br>(-0.3,<br>0.12)                                   | -0.13<br>(-0.41,<br>0.04)                     | -0.08<br>(-0.37,<br>0.1)                                   | -0.1<br>(-0.41,<br>0.09)                      |
| log VL Day2<br>PostChal-<br>lenge BAL<br>Subgenomic          | -0.31<br>(-0.52,<br>-0.15)                      | -0.04<br>(-0.29,<br>0.16)          | -0.11<br>(-0.34,<br>0.05)                               | -0.09<br>(-0.33,<br>0.08)                  | -0.11<br>(-0.34,<br>0.03)                                  | -0.2<br>(-0.42,<br>-0.04)                     | -0.15<br>(-0.38,<br>0)                                     | -0.22<br>(-0.45,<br>-0.06)                    |
| log VL Day2<br>PostChal-<br>lenge<br>OPswab N1               | 0.31<br>(0.03,<br>0.49)                         | 0.05<br>(-0.26,<br>0.23)           | 0.32<br>(0.1,<br>0.44)                                  | 0.4<br>(0.18,<br>0.52)                     | 0.14<br>(-0.09,<br>0.25)                                   | 0.12<br>(-0.11,<br>0.24)                      | 0.18<br>(-0.07,<br>0.32)                                   | 0.17<br>(-0.07,<br>0.31)                      |
| log VL Day2<br>PostChal-<br>lenge<br>OPswab<br>Subgenomic    | 0.33<br>(0.07,<br>0.51)                         | -0.05<br>(-0.31,<br>0.13)          | 0.37<br>(0.16,<br>0.51)                                 | 0.45<br>(0.23,<br>0.59)                    | 0.17<br>(-0.03,<br>0.29)                                   | 0.07<br>(-0.15,<br>0.2)                       | 0.23<br>(0.01,<br>0.38)                                    | 0.19<br>(-0.04,<br>0.35)                      |
| log VL Day2<br>PostChal-<br>lenge<br>NasalSwab<br>N1         | 0.54<br>(0.2,<br>0.79)                          | 0.18<br>(-0.12,<br>0.43)           | 0.26<br>(-0.03,<br>0.53)                                | 0.32<br>(0.03,<br>0.55)                    | 0.33<br>(0.05,<br>0.58)                                    | 0.35<br>(0,<br>0.65)                          | 0.45<br>(0.12,<br>0.7)                                     | 0.41<br>(0.03,<br>0.71)                       |
| log VL Day2<br>PostChal-<br>lenge<br>NasalSwab<br>Subgenomic | 0.54<br>(0.26,<br>0.72)                         | -0.08<br>(-0.43,<br>0.13)          | 0.38<br>(0.1,<br>0.58)                                  | 0.37<br>(0.12,<br>0.55)                    | 0.36<br>(0.16,<br>0.52)                                    | 0.38<br>(0.04,<br>0.67)                       | 0.45<br>(0.18,<br>0.63)                                    | 0.39<br>(0.11,<br>0.6)                        |

## Binary Viral Load

Table 6.8.18: Binary RMAC with Sanofi Vaccine Product Excluded

|                                                              | log<br>MN 2<br>weeks<br>prior<br>chal-<br>lenge | log<br>MN<br>day<br>chal-<br>lenge | log<br>MSD<br>ECL 2<br>weeks<br>prior<br>chal-<br>lenge | log<br>MSD<br>ECL<br>day<br>chal-<br>lenge | log<br>PsVNA<br>ID50 2<br>weeks<br>prior<br>chal-<br>lenge | log<br>PsVNA<br>ID50<br>day<br>chal-<br>lenge | log<br>PsVNA<br>ID80 2<br>weeks<br>prior<br>chal-<br>lenge | log<br>PsVNA<br>ID80<br>day<br>chal-<br>lenge |
|--------------------------------------------------------------|-------------------------------------------------|------------------------------------|---------------------------------------------------------|--------------------------------------------|------------------------------------------------------------|-----------------------------------------------|------------------------------------------------------------|-----------------------------------------------|
| bin VL Day2<br>PostChal-<br>lenge BAL<br>N1                  | -0.02<br>(-0.06,<br>1)                          | 1 (1,<br>1)                        | -0.02<br>(-0.06,<br>1)                                  | 1 (1,<br>1)                                | 1 (1,<br>1)                                                | -0.02<br>(-0.06,<br>1)                        | -0.02<br>(-0.06,<br>1)                                     | 1 (1,<br>1)                                   |
| bin VL Day2<br>PostChal-<br>lenge BAL<br>Subgenomic          | 0.25<br>(-0.17,<br>0.61)                        | 0.02<br>(-0.36,<br>0.41)           | 0.05<br>(-0.33,<br>0.44)                                | 0.19<br>(-0.24,<br>0.56)                   | -0.02<br>(-0.41,<br>0.35)                                  | 0.09<br>(-0.31,<br>0.46)                      | -0.02<br>(-0.41,<br>0.35)                                  | -0.33<br>(-0.68,<br>0.03)                     |
| bin VL Day2<br>PostChal-<br>lenge<br>OPswab N1               | 0.46<br>(-0.08,<br>1)                           | -0.06<br>(-0.13,<br>1)             | -0.08<br>(-0.18,<br>-0.02)                              | -0.06<br>(-0.16,<br>1)                     | -0.02<br>(-0.06,<br>1)                                     | -0.04<br>(-0.11,<br>1)                        | -0.04<br>(-0.11,<br>1)                                     | 0.65<br>(-0.06,<br>1)                         |
| bin VL Day2<br>PostChal-<br>lenge<br>OPswab<br>Subgenomic    | 0.08<br>(-0.3,<br>0.49)                         | 0.19<br>(-0.22,<br>0.6)            | -0.03<br>(-0.41,<br>0.35)                               | 0.5<br>(-0.08,<br>0.88)                    | -0.17<br>(-0.46,<br>0.16)                                  | 0.13<br>(-0.27,<br>0.53)                      | 0.42<br>(-0.11,<br>0.8)                                    | 0.28<br>(-0.18,<br>0.66)                      |
| bin VL Day2<br>PostChal-<br>lenge<br>NasalSwab<br>N1         | 1 (1,<br>1)                                     | 1 (1,<br>1)                        | 1 (1,<br>1)                                             | 1 (1,<br>1)                                | -0.02<br>(-0.06,<br>1)                                     | 1 (1,<br>1)                                   | 1 (1,<br>1)                                                | 1 (1,<br>1)                                   |
| bin VL Day2<br>PostChal-<br>lenge<br>NasalSwab<br>Subgenomic | -0.13<br>(-0.24,<br>-0.04)                      | -0.11<br>(-0.21,<br>-0.04)         | -0.08<br>(-0.18,<br>-0.02)                              | -0.06<br>(-0.13,<br>1)                     | 0.11<br>(-0.24,<br>0.57)                                   | -0.16<br>(-0.3,<br>-0.06)                     | -0.02<br>(-0.06,<br>1)                                     | -0.13<br>(-0.24,<br>-0.04)                    |

Table 6.8.19: Binary RMAC with Moderna Vaccine Product Excluded

|                                                              | log<br>MN 2<br>weeks<br>prior<br>chal-<br>lenge | log<br>MN<br>day<br>chal-<br>lenge | log<br>MSD<br>ECL 2<br>weeks<br>prior<br>chal-<br>lenge | log<br>MSD<br>ECL<br>day<br>chal-<br>lenge | log<br>PsVNA<br>ID50 2<br>weeks<br>prior<br>chal-<br>lenge | log<br>PsVNA<br>ID50<br>day<br>chal-<br>lenge | log<br>PsVNA<br>ID80 2<br>weeks<br>prior<br>chal-<br>lenge | log<br>PsVNA<br>ID80<br>day<br>chal-<br>lenge |
|--------------------------------------------------------------|-------------------------------------------------|------------------------------------|---------------------------------------------------------|--------------------------------------------|------------------------------------------------------------|-----------------------------------------------|------------------------------------------------------------|-----------------------------------------------|
| bin VL Day2<br>PostChal-<br>lenge BAL<br>N1                  | -0.02<br>(-0.06,<br>1)                          | -0.04<br>(-0.11,<br>1)             | -0.02<br>(-0.06,<br>1)                                  | -0.02<br>(-0.06,<br>1)                     | -0.02<br>(-0.06,<br>1)                                     | -0.04<br>(-0.11,<br>1)                        | -0.02<br>(-0.06,<br>1)                                     | -0.02<br>(-0.06,<br>1)                        |
| bin VL Day2<br>PostChal-<br>lenge BAL<br>Subgenomic          | 0.31<br>(-0.1,<br>0.67)                         | -0.19<br>(-0.47,<br>0.17)          | -0.14<br>(-0.53,<br>0.26)                               | 0.38<br>(-0.05,<br>0.73)                   | 0.17<br>(-0.24,<br>0.52)                                   | 0.31<br>(-0.1,<br>0.67)                       | 0.58<br>(0.2,<br>0.84)                                     | 0.01<br>(-0.35,<br>0.4)                       |
| bin VL Day2<br>PostChal-<br>lenge<br>OPswab N1               | -0.06<br>(-0.13,<br>1)                          | -0.06<br>(-0.13,<br>1)             | -0.06<br>(-0.13,<br>1)                                  | -0.04<br>(-0.11,<br>1)                     | -0.06<br>(-0.16,<br>1)                                     | -0.06<br>(-0.13,<br>1)                        | 1 (1,<br>1)                                                | -0.02<br>(-0.06,<br>1)                        |
| bin VL Day2<br>PostChal-<br>lenge<br>OPswab<br>Subgenomic    | -0.33<br>(-0.53,<br>-0.18)                      | 0.13<br>(-0.27,<br>0.51)           | -0.24<br>(-0.41,<br>-0.11)                              | 0.01<br>(-0.3,<br>0.42)                    | -0.24<br>(-0.41,<br>-0.11)                                 | 0.42<br>(-0.11,<br>0.8)                       | 0.08<br>(-0.3,<br>0.49)                                    | 0.06<br>(-0.27,<br>0.5)                       |
| bin VL Day2<br>PostChal-<br>lenge<br>NasalSwab<br>N1         | 1 (1,<br>1)                                     | 1 (1,<br>1)                        | 1 (1,<br>1)                                             | 1 (1,<br>1)                                | -0.02<br>(-0.06,<br>1)                                     | 1 (1,<br>1)                                   | 1 (1,<br>1)                                                | 1 (1,<br>1)                                   |
| bin VL Day2<br>PostChal-<br>lenge<br>NasalSwab<br>Subgenomic | 0.11<br>(-0.24,<br>0.6)                         | -0.11<br>(-0.21,<br>-0.02)         | -0.11<br>(-0.21,<br>-0.02)                              | 0.25<br>(-0.16,<br>0.78)                   | 0.25<br>(-0.16,<br>0.78)                                   | 0.26<br>(-0.18,<br>0.7)                       | -0.16<br>(-0.3,<br>-0.06)                                  | 0.34<br>(-0.13,<br>1)                         |

Table 6.8.20: Binary RMAC with Janssen Vaccine Product Excluded

|                                                              | log<br>MN 2<br>weeks<br>prior<br>chal-<br>lenge | log<br>MN<br>day<br>chal-<br>lenge | log<br>MSD<br>ECL 2<br>weeks<br>prior<br>chal-<br>lenge | log<br>MSD<br>ECL<br>day<br>chal-<br>lenge | log<br>PsVNA<br>ID50 2<br>weeks<br>prior<br>chal-<br>lenge | log<br>PsVNA<br>ID50<br>day<br>chal-<br>lenge | log<br>PsVNA<br>ID80 2<br>weeks<br>prior<br>chal-<br>lenge | log<br>PsVNA<br>ID80<br>day<br>chal-<br>lenge |
|--------------------------------------------------------------|-------------------------------------------------|------------------------------------|---------------------------------------------------------|--------------------------------------------|------------------------------------------------------------|-----------------------------------------------|------------------------------------------------------------|-----------------------------------------------|
| bin VL Day2<br>PostChal-<br>lenge BAL<br>N1                  | -0.03<br>(-0.08,<br>1)                          | 1 (1,<br>1)                        | 1 (1,<br>1)                                             | 1 (1,<br>1)                                | 1 (1,<br>1)                                                | -0.02<br>(-0.05,<br>1)                        | 1 (1,<br>1)                                                | 1 (1,<br>1)                                   |
| bin VL Day2<br>PostChal-<br>lenge BAL<br>Subgenomic          | -0.15<br>(-0.47,<br>0.18)                       | 0.13<br>(-0.25,<br>0.48)           | 0.08<br>(-0.28,<br>0.42)                                | 0.07<br>(-0.29,<br>0.42)                   | -0.28<br>(-0.42,<br>-0.16)                                 | -0.13<br>(-0.39,<br>0.18)                     | 0<br>(-0.31,<br>0.36)                                      | 0.23<br>(-0.16,<br>0.58)                      |
| bin VL Day2<br>PostChal-<br>lenge<br>OPswab N1               | -0.03<br>(-0.08,<br>1)                          | -0.07<br>(-0.14,<br>-0.02)         | 0.65<br>(-0.05,<br>1)                                   | -0.03<br>(-0.08,<br>1)                     | -0.05<br>(-0.12,<br>1)                                     | -0.03<br>(-0.08,<br>1)                        | -0.05<br>(-0.1,<br>1)                                      | -0.05<br>(-0.1,<br>1)                         |
| bin VL Day2<br>PostChal-<br>lenge<br>OPswab<br>Subgenomic    | 0.18<br>(-0.21,<br>0.56)                        | -0.04<br>(-0.36,<br>0.32)          | -0.19<br>(-0.31,<br>-0.08)                              | 0.09<br>(-0.21,<br>0.52)                   | 0.09<br>(-0.21,<br>0.52)                                   | 0.01<br>(-0.25,<br>0.38)                      | -0.25<br>(-0.42,<br>-0.14)                                 | -0.13<br>(-0.39,<br>0.18)                     |
| bin VL Day2<br>PostChal-<br>lenge<br>NasalSwab<br>N1         | 1 (1,<br>1)                                     | 1 (1,<br>1)                        | 1 (1,<br>1)                                             | 1 (1,<br>1)                                | 1 (1,<br>1)                                                | 1 (1,<br>1)                                   | 1 (1,<br>1)                                                | 1 (1,<br>1)                                   |
| bin VL Day2<br>PostChal-<br>lenge<br>NasalSwab<br>Subgenomic | -0.08<br>(-0.16,<br>-0.02)                      | 0.26<br>(-0.12,<br>0.78)           | -0.1<br>(-0.21,<br>-0.03)                               | 0.2<br>(-0.14,<br>0.65)                    | 0.2<br>(-0.14,<br>0.65)                                    | -0.12<br>(-0.23,<br>-0.05)                    | -0.14<br>(-0.25,<br>-0.05)                                 | -0.08<br>(-0.16,<br>-0.02)                    |

Table 6.8.21: Binary RMAC with Novavax Vaccine Product Excluded

|                                                              | log<br>MN 2<br>weeks<br>prior<br>chal-<br>lenge | log<br>MN<br>day<br>chal-<br>lenge | log<br>MSD<br>ECL 2<br>weeks<br>prior<br>chal-<br>lenge | log<br>MSD<br>ECL<br>day<br>chal-<br>lenge | log<br>PsVNA<br>ID50 2<br>weeks<br>prior<br>chal-<br>lenge | log<br>PsVNA<br>ID50<br>day<br>chal-<br>lenge | log<br>PsVNA<br>ID80 2<br>weeks<br>prior<br>chal-<br>lenge | log<br>PsVNA<br>ID80<br>day<br>chal-<br>lenge |
|--------------------------------------------------------------|-------------------------------------------------|------------------------------------|---------------------------------------------------------|--------------------------------------------|------------------------------------------------------------|-----------------------------------------------|------------------------------------------------------------|-----------------------------------------------|
| bin VL Day2<br>PostChal-<br>lenge BAL<br>N1                  | -0.11<br>(-0.21,<br>-0.02)                      | -0.16<br>(-0.3,<br>-0.06)          | 0.25<br>(-0.16,<br>0.78)                                | -0.11<br>(-0.21,<br>-0.02)                 | -0.17<br>(-0.46,<br>0.17)                                  | -0.08<br>(-0.18,<br>-0.02)                    | 0.16<br>(-0.26,<br>0.53)                                   | 0.01<br>(-0.3,<br>0.41)                       |
| bin VL Day2<br>PostChal-<br>lenge BAL<br>Subgenomic          | -0.14<br>(-0.52,<br>0.21)                       | 0.09<br>(-0.31,<br>0.46)           | -0.24<br>(-0.62,<br>0.14)                               | -0.1<br>(-0.48,<br>0.28)                   | 0.02<br>(-0.33,<br>0.41)                                   | 0.05<br>(-0.36,<br>0.39)                      | -0.22<br>(-0.49,<br>0.11)                                  | -0.26<br>(-0.64,<br>0.09)                     |
| bin VL Day2<br>PostChal-<br>lenge<br>OPswab N1               | -0.08<br>(-0.37,<br>0.28)                       | -0.04<br>(-0.33,<br>0.35)          | 0.01<br>(-0.3,<br>0.41)                                 | -0.18<br>(-0.33,<br>-0.08)                 | -0.18<br>(-0.33,<br>-0.08)                                 | -0.18<br>(-0.33,<br>-0.08)                    | 0.02<br>(-0.33,<br>0.41)                                   | 0.19<br>(-0.24,<br>0.61)                      |
| bin VL Day2<br>PostChal-<br>lenge<br>OPswab<br>Subgenomic    | -0.31<br>(-0.68,<br>0.05)                       | -0.08<br>(-0.46,<br>0.3)           | -0.24<br>(-0.62,<br>0.14)                               | 0.07<br>(-0.33,<br>0.44)                   | 0.23<br>(-0.17,<br>0.6)                                    | 0.23<br>(-0.17,<br>0.54)                      | 0.12<br>(-0.3,<br>0.51)                                    | 0.35<br>(-0.04,<br>0.69)                      |
| bin VL Day2<br>PostChal-<br>lenge<br>NasalSwab<br>N1         | -0.02<br>(-0.06,<br>1)                          | -0.02<br>(-0.06,<br>1)             | -0.02<br>(-0.06,<br>1)                                  | -0.02<br>(-0.06,<br>1)                     | -0.02<br>(-0.06,<br>1)                                     | -0.02<br>(-0.06,<br>1)                        | -0.02<br>(-0.06,<br>1)                                     | -0.02<br>(-0.06,<br>1)                        |
| bin VL Day2<br>PostChal-<br>lenge<br>NasalSwab<br>Subgenomic | -0.22<br>(-0.49,<br>0.11)                       | -0.03<br>(-0.41,<br>0.34)          | -0.44<br>(-0.68,<br>-0.27)                              | -0.37<br>(-0.58,<br>-0.21)                 | -0.19<br>(-0.53,<br>0.16)                                  | -0.19<br>(-0.53,<br>0.16)                     | -0.3<br>(-0.49,<br>-0.16)                                  | 0.03<br>(-0.38,<br>0.39)                      |

Table 6.8.22: Binary RMAC Average

|                                                              | log MN<br>2 weeks<br>prior<br>chal-<br>lenge | log MN<br>day<br>chal-<br>lenge | log<br>MSD<br>ECL 2<br>weeks<br>prior<br>chal-<br>lenge | log<br>MSD<br>ECL<br>day<br>chal-<br>lenge | log<br>PsVNA<br>ID50 2<br>weeks<br>prior<br>chal-<br>lenge | log<br>PsVNA<br>ID50<br>day<br>chal-<br>lenge | log<br>PsVNA<br>ID80 2<br>weeks<br>prior<br>chal-<br>lenge | log<br>PsVNA<br>ID80<br>day<br>chal-<br>lenge |
|--------------------------------------------------------------|----------------------------------------------|---------------------------------|---------------------------------------------------------|--------------------------------------------|------------------------------------------------------------|-----------------------------------------------|------------------------------------------------------------|-----------------------------------------------|
| bin VL Day2<br>PostChal-<br>lenge BAL<br>N1                  | -0.0450                                      | 0.4500                          | 0.3025                                                  | 0.4675                                     | 0.4525                                                     | -0.0400                                       | 0.2800                                                     | 0.4975                                        |
| bin VL Day2<br>PostChal-<br>lenge BAL<br>Subgenomic          | 0.0675                                       | 0.0125                          | -0.0625                                                 | 0.1350                                     | -0.0275                                                    | 0.0800                                        | 0.0850                                                     | -0.0875                                       |
| bin VL Day2<br>PostChal-<br>lenge<br>OPswab N1               | 0.0725                                       | -0.0575                         | 0.1300                                                  | -0.0775                                    | -0.0775                                                    | -0.0775                                       | 0.2325                                                     | 0.1925                                        |
| bin VL Day2<br>PostChal-<br>lenge<br>OPswab<br>Subgenomic    | -0.0950                                      | 0.0500                          | -0.1750                                                 | 0.1675                                     | -0.0225                                                    | 0.1975                                        | 0.0925                                                     | 0.1400                                        |
| bin VL Day2<br>PostChal-<br>lenge<br>NasalSwab<br>N1         | 0.7450                                       | 0.7450                          | 0.7450                                                  | 0.7450                                     | 0.2350                                                     | 0.7450                                        | 0.7450                                                     | 0.7450                                        |
| bin VL Day2<br>PostChal-<br>lenge<br>NasalSwab<br>Subgenomic | -0.0800                                      | 0.0025                          | -0.1825                                                 | 0.0050                                     | 0.0925                                                     | -0.0525                                       | -0.1550                                                    | 0.0400                                        |

## Pairs of Vaccine Products

Table 6.8.23: Binary RMAC using Sanofi to predict Moderna

|                                                              | log<br>MN 2<br>weeks<br>prior<br>chal-<br>lenge | log<br>MN<br>day<br>chal-<br>lenge | log<br>MSD<br>ECL 2<br>weeks<br>prior<br>chal-<br>lenge | log<br>MSD<br>ECL<br>day<br>chal-<br>lenge | log<br>PsVNA<br>ID50 2<br>weeks<br>prior<br>chal-<br>lenge | log<br>PsVNA<br>ID50<br>day<br>chal-<br>lenge | log<br>PsVNA<br>ID80 2<br>weeks<br>prior<br>chal-<br>lenge | log<br>PsVNA<br>ID80<br>day<br>chal-<br>lenge |
|--------------------------------------------------------------|-------------------------------------------------|------------------------------------|---------------------------------------------------------|--------------------------------------------|------------------------------------------------------------|-----------------------------------------------|------------------------------------------------------------|-----------------------------------------------|
| bin VL Day2<br>PostChal-<br>lenge BAL<br>N1                  | -0.02<br>(-0.06,<br>1)                          | -0.02<br>(-0.06,<br>1)             | -0.02<br>(-0.06,<br>1)                                  | -0.02<br>(-0.06,<br>1)                     | -0.02<br>(-0.06,<br>1)                                     | -0.02<br>(-0.06,<br>1)                        | -0.02<br>(-0.06,<br>1)                                     | -0.02<br>(-0.06,<br>1)                        |
| bin VL Day2<br>PostChal-<br>lenge BAL<br>Subgenomic          | 0.08<br>(-0.32,<br>0.48)                        | 0.27<br>(-0.19,<br>0.69)           | -0.14<br>(-0.43,<br>0.21)                               | 0.01<br>(-0.39,<br>0.4)                    | 0.38<br>(-0.05,<br>0.73)                                   | 0.12<br>(-0.28,<br>0.52)                      | -0.14<br>(-0.43,<br>0.21)                                  | 0.18<br>(-0.25,<br>0.59)                      |
| bin VL Day2<br>PostChal-<br>lenge<br>OPswab N1               | -0.04<br>(-0.11,<br>1)                          | -0.04<br>(-0.11,<br>1)             | -0.02<br>(-0.06,<br>1)                                  | -0.02<br>(-0.06,<br>1)                     | -0.04<br>(-0.11,<br>1)                                     | -0.02<br>(-0.06,<br>1)                        | 1 (1,<br>1)                                                | 1 (1,<br>1)                                   |
| bin VL Day2<br>PostChal-<br>lenge<br>OPswab<br>Subgenomic    | 0.01<br>(-0.3,<br>0.41)                         | -0.16<br>(-0.3,<br>-0.06)          | 0.06<br>(-0.27,<br>0.5)                                 | -0.16<br>(-0.3,<br>-0.06)                  | -0.24<br>(-0.41,<br>-0.11)                                 | -0.13<br>(-0.24,<br>-0.04)                    | 0.19<br>(-0.24,<br>0.6)                                    | -0.16<br>(-0.3,<br>-0.06)                     |
| bin VL Day2<br>PostChal-<br>lenge<br>NasalSwab<br>N1         | 1 (1,<br>1)                                     | 1 (1,<br>1)                        | 1 (1,<br>1)                                             | 1 (1,<br>1)                                | 1 (1,<br>1)                                                | 1 (1,<br>1)                                   | 1 (1,<br>1)                                                | 1 (1,<br>1)                                   |
| bin VL Day2<br>PostChal-<br>lenge<br>NasalSwab<br>Subgenomic | -0.08<br>(-0.18,<br>-0.02)                      | -0.06<br>(-0.13,<br>1)             | -0.06<br>(-0.16,<br>1)                                  | -0.06<br>(-0.16,<br>1)                     | 0.17<br>(-0.18,<br>0.65)                                   | 0.34<br>(-0.13,<br>1)                         | -0.08<br>(-0.18,<br>-0.02)                                 | -0.06<br>(-0.13,<br>1)                        |

Table 6.8.24: Binary RMAC using Sanofi to predict Janssen

|                                                              | log<br>MN 2<br>weeks<br>prior<br>chal-<br>lenge | log<br>MN<br>day<br>chal-<br>lenge | log<br>MSD<br>ECL 2<br>weeks<br>prior<br>chal-<br>lenge | log<br>MSD<br>ECL<br>day<br>chal-<br>lenge | log<br>PsVNA<br>ID50 2<br>weeks<br>prior<br>chal-<br>lenge | log<br>PsVNA<br>ID50<br>day<br>chal-<br>lenge | log<br>PsVNA<br>ID80 2<br>weeks<br>prior<br>chal-<br>lenge | log<br>PsVNA<br>ID80<br>day<br>chal-<br>lenge |
|--------------------------------------------------------------|-------------------------------------------------|------------------------------------|---------------------------------------------------------|--------------------------------------------|------------------------------------------------------------|-----------------------------------------------|------------------------------------------------------------|-----------------------------------------------|
| bin VL Day2<br>PostChal-<br>lenge BAL<br>N1                  | 1 (1,<br>1)                                     | 1 (1,<br>1)                        | 1 (1,<br>1)                                             | 1 (1,<br>1)                                | 1 (1,<br>1)                                                | 1 (1,<br>1)                                   | 1 (1,<br>1)                                                | 1 (1,<br>1)                                   |
| bin VL Day2<br>PostChal-<br>lenge BAL<br>Subgenomic          | -0.02<br>(-0.36,<br>0.33)                       | 0.23<br>(-0.17,<br>0.56)           | 0.12<br>(-0.25,<br>0.45)                                | 0.38<br>(-0.02,<br>0.71)                   | -0.28<br>(-0.42,<br>-0.16)                                 | -0.13<br>(-0.39,<br>0.18)                     | 0.09<br>(-0.25,<br>0.45)                                   | 0.33<br>(-0.06,<br>0.67)                      |
| bin VL Day2<br>PostChal-<br>lenge<br>OPswab N1               | 0.35<br>(-0.1,<br>1)                            | -0.08<br>(-0.16,<br>-0.02)         | 0.65<br>(-0.05,<br>1)                                   | -0.05<br>(-0.12,<br>1)                     | -0.05<br>(-0.12,<br>1)                                     | -0.03<br>(-0.08,<br>1)                        | -0.07<br>(-0.14,<br>-0.02)                                 | -0.05<br>(-0.1,<br>1)                         |
| bin VL Day2<br>PostChal-<br>lenge<br>OPswab<br>Subgenomic    | 0.18<br>(-0.21,<br>0.56)                        | -0.28<br>(-0.45,<br>-0.16)         | -0.19<br>(-0.31,<br>-0.08)                              | 0.09<br>(-0.21,<br>0.52)                   | 0.09<br>(-0.21,<br>0.52)                                   | -0.03<br>(-0.28,<br>0.33)                     | -0.23<br>(-0.39,<br>-0.12)                                 | -0.17<br>(-0.42,<br>0.13)                     |
| bin VL Day2<br>PostChal-<br>lenge<br>NasalSwab<br>N1         | 1 (1,<br>1)                                     | 1 (1,<br>1)                        | 1 (1,<br>1)                                             | 1 (1,<br>1)                                | 1 (1,<br>1)                                                | 1 (1,<br>1)                                   | 1 (1,<br>1)                                                | 1 (1,<br>1)                                   |
| bin VL Day2<br>PostChal-<br>lenge<br>NasalSwab<br>Subgenomic | -0.08<br>(-0.16,<br>-0.02)                      | -0.07<br>(-0.14,<br>-0.02)         | -0.07<br>(-0.14,<br>-0.02)                              | -0.07<br>(-0.14,<br>-0.02)                 | -0.08<br>(-0.16,<br>-0.02)                                 | -0.07<br>(-0.14,<br>-0.02)                    | -0.1<br>(-0.21,<br>-0.03)                                  | -0.07<br>(-0.14,<br>-0.02)                    |

Table 6.8.25: Binary RMAC using Sanofi to predict Novavax

|                                                              | log<br>MN 2<br>weeks<br>prior<br>chal-<br>lenge | log<br>MN<br>day<br>chal-<br>lenge | log<br>MSD<br>ECL 2<br>weeks<br>prior<br>chal-<br>lenge | log<br>MSD<br>ECL<br>day<br>chal-<br>lenge | log<br>PsVNA<br>ID50 2<br>weeks<br>prior<br>chal-<br>lenge | log<br>PsVNA<br>ID50<br>day<br>chal-<br>lenge | log<br>PsVNA<br>ID80 2<br>weeks<br>prior<br>chal-<br>lenge | log<br>PsVNA<br>ID80<br>day<br>chal-<br>lenge |
|--------------------------------------------------------------|-------------------------------------------------|------------------------------------|---------------------------------------------------------|--------------------------------------------|------------------------------------------------------------|-----------------------------------------------|------------------------------------------------------------|-----------------------------------------------|
| bin VL Day2<br>PostChal-<br>lenge BAL<br>N1                  | -0.08<br>(-0.18,<br>-0.02)                      | -0.08<br>(-0.18,<br>-0.02)         | -0.08<br>(-0.18,<br>-0.02)                              | -0.08<br>(-0.18,<br>-0.02)                 | -0.08<br>(-0.18,<br>-0.02)                                 | -0.08<br>(-0.18,<br>-0.02)                    | -0.08<br>(-0.18,<br>-0.02)                                 | -0.08<br>(-0.18,<br>-0.02)                    |
| bin VL Day2<br>PostChal-<br>lenge BAL<br>Subgenomic          | 0.21<br>(-0.2,<br>0.54)                         | -0.17<br>(-0.55,<br>0.21)          | -0.38<br>(-0.73,<br>-0.01)                              | -0.39<br>(-0.73,<br>-0.04)                 | -0.26<br>(-0.63,<br>0.1)                                   | -0.33<br>(-0.68,<br>0.02)                     | 0.21<br>(-0.2,<br>0.59)                                    | 0.12<br>(-0.3,<br>0.46)                       |
| bin VL Day2<br>PostChal-<br>lenge<br>OPswab N1               | -0.04<br>(-0.44,<br>0.32)                       | -0.18<br>(-0.33,<br>-0.08)         | 0.06<br>(-0.27,<br>0.5)                                 | -0.18<br>(-0.33,<br>-0.08)                 | -0.18<br>(-0.33,<br>-0.08)                                 | -0.18<br>(-0.33,<br>-0.08)                    | 0.05<br>(-0.36,<br>0.42)                                   | -0.17<br>(-0.44,<br>0.19)                     |
| bin VL Day2<br>PostChal-<br>lenge<br>OPswab<br>Subgenomic    | 0.03<br>(-0.36,<br>0.39)                        | 0<br>(-0.39,<br>0.38)              | 0.31<br>(-0.08,<br>0.67)                                | 0.45<br>(0.05,<br>0.77)                    | 0.03<br>(-0.37,<br>0.41)                                   | -0.58<br>(-0.86,<br>-0.3)                     | 0.16<br>(-0.26,<br>0.54)                                   | 0.14<br>(-0.26,<br>0.51)                      |
| bin VL Day2<br>PostChal-<br>lenge<br>NasalSwab<br>N1         | -0.02<br>(-0.06,<br>1)                          | -0.02<br>(-0.06,<br>1)             | -0.02<br>(-0.06,<br>1)                                  | -0.02<br>(-0.06,<br>1)                     | -0.02<br>(-0.06,<br>1)                                     | -0.02<br>(-0.06,<br>1)                        | -0.02<br>(-0.06,<br>1)                                     | -0.02<br>(-0.06,<br>1)                        |
| bin VL Day2<br>PostChal-<br>lenge<br>NasalSwab<br>Subgenomic | -0.17<br>(-0.44,<br>0.16)                       | -0.03<br>(-0.41,<br>0.34)          | -0.33<br>(-0.53,<br>-0.18)                              | -0.37<br>(-0.58,<br>-0.21)                 | 0.14<br>(-0.26,<br>0.51)                                   | -0.13<br>(-0.41,<br>0.26)                     | -0.3<br>(-0.49,<br>-0.16)                                  | 0.03<br>(-0.37,<br>0.41)                      |

Table 6.8.26: Binary RMAC using Moderna to predict Sanofi

|                                                              | log<br>MN 2<br>weeks<br>prior<br>chal-<br>lenge | log<br>MN<br>day<br>chal-<br>lenge | log<br>MSD<br>ECL 2<br>weeks<br>prior<br>chal-<br>lenge | log<br>MSD<br>ECL<br>day<br>chal-<br>lenge | log<br>PsVNA<br>ID50 2<br>weeks<br>prior<br>chal-<br>lenge | log<br>PsVNA<br>ID50<br>day<br>chal-<br>lenge | log<br>PsVNA<br>ID80 2<br>weeks<br>prior<br>chal-<br>lenge | log<br>PsVNA<br>ID80<br>day<br>chal-<br>lenge |
|--------------------------------------------------------------|-------------------------------------------------|------------------------------------|---------------------------------------------------------|--------------------------------------------|------------------------------------------------------------|-----------------------------------------------|------------------------------------------------------------|-----------------------------------------------|
| bin VL Day2<br>PostChal-<br>lenge BAL<br>N1                  | -0.02<br>(-0.06,<br>1)                          | -0.02<br>(-0.06,<br>1)             | -0.04<br>(-0.11,<br>1)                                  | -0.06<br>(-0.13,<br>1)                     | 1 (1,<br>1)                                                | -0.02<br>(-0.06,<br>1)                        | -0.02<br>(-0.06,<br>1)                                     | 1 (1,<br>1)                                   |
| bin VL Day2<br>PostChal-<br>lenge BAL<br>Subgenomic          | 0.15<br>(-0.26,<br>0.53)                        | 0.02<br>(-0.36,<br>0.41)           | 0.15<br>(-0.26,<br>0.51)                                | 0.03<br>(-0.37,<br>0.42)                   | 0.1<br>(-0.3,<br>0.49)                                     | 0.09<br>(-0.31,<br>0.45)                      | 0.1<br>(-0.3,<br>0.49)                                     | -0.31<br>(-0.69,<br>0.05)                     |
| bin VL Day2<br>PostChal-<br>lenge<br>OPswab N1               | -0.02<br>(-0.06,<br>1)                          | -0.02<br>(-0.06,<br>1)             | -0.02<br>(-0.06,<br>1)                                  | -0.02<br>(-0.06,<br>1)                     | -0.02<br>(-0.06,<br>1)                                     | -0.02<br>(-0.06,<br>1)                        | -0.02<br>(-0.06,<br>1)                                     | -0.02<br>(-0.06,<br>1)                        |
| bin VL Day2<br>PostChal-<br>lenge<br>OPswab<br>Subgenomic    | 0.01<br>(-0.3,<br>0.42)                         | -0.16<br>(-0.3,<br>-0.06)          | -0.13<br>(-0.24,<br>-0.04)                              | 0.5<br>(-0.08,<br>0.88)                    | -0.18<br>(-0.33,<br>-0.08)                                 | 0.13<br>(-0.27,<br>0.53)                      | -0.16<br>(-0.3,<br>-0.06)                                  | 0.33<br>(-0.16,<br>0.75)                      |
| bin VL Day2<br>PostChal-<br>lenge<br>NasalSwab<br>N1         | 1 (1,<br>1)                                     | 1 (1,<br>1)                        | 1 (1,<br>1)                                             | 1 (1,<br>1)                                | 1 (1,<br>1)                                                | 1 (1,<br>1)                                   | 1 (1,<br>1)                                                | 1 (1,<br>1)                                   |
| bin VL Day2<br>PostChal-<br>lenge<br>NasalSwab<br>Subgenomic | -0.06<br>(-0.16,<br>1)                          | -0.08<br>(-0.18,<br>-0.02)         | -0.13<br>(-0.24,<br>-0.04)                              | -0.06<br>(-0.13,<br>1)                     | 0.34<br>(-0.13,<br>1)                                      | -0.16<br>(-0.3,<br>-0.06)                     | -0.02<br>(-0.06,<br>1)                                     | -0.11<br>(-0.21,<br>-0.02)                    |

Table 6.8.27: Binary RMAC using Moderna to predict Janssen

|                                                              | log<br>MN 2<br>weeks<br>prior<br>chal-<br>lenge | log<br>MN<br>day<br>chal-<br>lenge | log<br>MSD<br>ECL 2<br>weeks<br>prior<br>chal-<br>lenge | log<br>MSD<br>ECL<br>day<br>chal-<br>lenge | log<br>PsVNA<br>ID50 2<br>weeks<br>prior<br>chal-<br>lenge | log<br>PsVNA<br>ID50<br>day<br>chal-<br>lenge | log<br>PsVNA<br>ID80 2<br>weeks<br>prior<br>chal-<br>lenge | log<br>PsVNA<br>ID80<br>day<br>chal-<br>lenge |
|--------------------------------------------------------------|-------------------------------------------------|------------------------------------|---------------------------------------------------------|--------------------------------------------|------------------------------------------------------------|-----------------------------------------------|------------------------------------------------------------|-----------------------------------------------|
| bin VL Day2<br>PostChal-<br>lenge BAL<br>N1                  | -0.03<br>(-0.08,<br>1)                          | -0.03<br>(-0.08,<br>1)             | 1 (1,<br>1)                                             | 1 (1,<br>1)                                | 1 (1,<br>1)                                                | -0.03<br>(-0.08,<br>1)                        | 1 (1,<br>1)                                                | 1 (1,<br>1)                                   |
| bin VL Day2<br>PostChal-<br>lenge BAL<br>Subgenomic          | 0.02<br>(-0.35,<br>0.36)                        | 0.22<br>(-0.17,<br>0.56)           | 0.03<br>(-0.33,<br>0.37)                                | -0.04<br>(-0.36,<br>0.28)                  | -0.13<br>(-0.39,<br>0.18)                                  | 0<br>(-0.33,<br>0.33)                         | -0.13<br>(-0.39,<br>0.2)                                   | 0.07<br>(-0.28,<br>0.42)                      |
| bin VL Day2<br>PostChal-<br>lenge<br>OPswab N1               | -0.03<br>(-0.08,<br>1)                          | -0.03<br>(-0.08,<br>1)             | -0.03<br>(-0.08,<br>1)                                  | -0.03<br>(-0.08,<br>1)                     | -0.03<br>(-0.08,<br>1)                                     | -0.03<br>(-0.08,<br>1)                        | -0.03<br>(-0.08,<br>1)                                     | -0.03<br>(-0.08,<br>1)                        |
| bin VL Day2<br>PostChal-<br>lenge<br>OPswab<br>Subgenomic    | -0.16<br>(-0.28,<br>-0.07)                      | -0.21<br>(-0.33,<br>-0.1)          | -0.19<br>(-0.31,<br>-0.08)                              | 0.01<br>(-0.25,<br>0.38)                   | -0.16<br>(-0.28,<br>-0.07)                                 | 0.01<br>(-0.25,<br>0.38)                      | -0.19<br>(-0.31,<br>-0.08)                                 | -0.06<br>(-0.31,<br>0.27)                     |
| bin VL Day2<br>PostChal-<br>lenge<br>NasalSwab<br>N1         | 1 (1,<br>1)                                     | 1 (1,<br>1)                        | 1 (1,<br>1)                                             | 1 (1,<br>1)                                | 1 (1,<br>1)                                                | 1 (1,<br>1)                                   | 1 (1,<br>1)                                                | 1 (1,<br>1)                                   |
| bin VL Day2<br>PostChal-<br>lenge<br>NasalSwab<br>Subgenomic | -0.1<br>(-0.19,<br>-0.03)                       | 0.26<br>(-0.12,<br>0.78)           | -0.12<br>(-0.23,<br>-0.05)                              | 0.14<br>(-0.19,<br>0.61)                   | 0.14<br>(-0.19,<br>0.61)                                   | -0.12<br>(-0.23,<br>-0.05)                    | -0.14<br>(-0.25,<br>-0.05)                                 | -0.1<br>(-0.21,<br>-0.03)                     |

Table 6.8.28: Binary RMAC using Moderna to predict Novavax

|                                                              | log<br>MN 2<br>weeks<br>prior<br>chal-<br>lenge | log<br>MN<br>day<br>chal-<br>lenge | log<br>MSD<br>ECL 2<br>weeks<br>prior<br>chal-<br>lenge | log<br>MSD<br>ECL<br>day<br>chal-<br>lenge | log<br>PsVNA<br>ID50 2<br>weeks<br>prior<br>chal-<br>lenge | log<br>PsVNA<br>ID50<br>day<br>chal-<br>lenge | log<br>PsVNA<br>ID80 2<br>weeks<br>prior<br>chal-<br>lenge | log<br>PsVNA<br>ID80<br>day<br>chal-<br>lenge |
|--------------------------------------------------------------|-------------------------------------------------|------------------------------------|---------------------------------------------------------|--------------------------------------------|------------------------------------------------------------|-----------------------------------------------|------------------------------------------------------------|-----------------------------------------------|
| bin VL Day2<br>PostChal-<br>lenge BAL<br>N1                  | -0.16<br>(-0.3,<br>-0.06)                       | -0.02<br>(-0.41,<br>0.35)          | 0.1<br>(-0.31,<br>0.49)                                 | 0.22<br>(-0.22,<br>0.6)                    | -0.17<br>(-0.46,<br>0.17)                                  | -0.11<br>(-0.21,<br>-0.02)                    | 0.1<br>(-0.31,<br>0.46)                                    | -0.22<br>(-0.49,<br>0.11)                     |
| bin VL Day2<br>PostChal-<br>lenge BAL<br>Subgenomic          | -0.08<br>(-0.44,<br>0.28)                       | 0.34<br>(-0.13,<br>0.69)           | -0.19<br>(-0.53,<br>0.16)                               | 0.08<br>(-0.3,<br>0.49)                    | 0.13<br>(-0.27,<br>0.53)                                   | 0.04<br>(-0.36,<br>0.41)                      | 0.08<br>(-0.3,<br>0.49)                                    | -0.14<br>(-0.49,<br>0.23)                     |
| bin VL Day2<br>PostChal-<br>lenge<br>OPswab N1               | -0.16<br>(-0.3,<br>-0.06)                       | -0.16<br>(-0.3,<br>-0.06)          | -0.16<br>(-0.27,<br>-0.06)                              | -0.16<br>(-0.3,<br>-0.06)                  | -0.16<br>(-0.3,<br>-0.06)                                  | -0.16<br>(-0.27,<br>-0.06)                    | -0.16<br>(-0.3,<br>-0.06)                                  | -0.16<br>(-0.3,<br>-0.06)                     |
| bin VL Day2<br>PostChal-<br>lenge<br>OPswab<br>Subgenomic    | -0.33<br>(-0.69,<br>0.02)                       | -0.01<br>(-0.41,<br>0.35)          | -0.49<br>(-0.73,<br>-0.3)                               | -0.41<br>(-0.7,<br>-0.08)                  | 0.14<br>(-0.26,<br>0.53)                                   | 0<br>(-0.39,<br>0.37)                         | -0.36<br>(-0.64,<br>-0.03)                                 | -0.17<br>(-0.55,<br>0.21)                     |
| bin VL Day2<br>PostChal-<br>lenge<br>NasalSwab<br>N1         | -0.02<br>(-0.06,<br>1)                          | -0.02<br>(-0.06,<br>1)             | -0.02<br>(-0.06,<br>1)                                  | -0.02<br>(-0.06,<br>1)                     | -0.02<br>(-0.06,<br>1)                                     | -0.02<br>(-0.06,<br>1)                        | -0.02<br>(-0.06,<br>1)                                     | -0.02<br>(-0.06,<br>1)                        |
| bin VL Day2<br>PostChal-<br>lenge<br>NasalSwab<br>Subgenomic | -0.26<br>(-0.58,<br>0.08)                       | 0.09<br>(-0.31,<br>0.46)           | -0.36<br>(-0.64,<br>-0.08)                              | -0.37<br>(-0.58,<br>-0.21)                 | -0.14<br>(-0.48,<br>0.22)                                  | -0.3<br>(-0.63,<br>0.05)                      | -0.37<br>(-0.58,<br>-0.21)                                 | 0.03<br>(-0.38,<br>0.39)                      |

Table 6.8.29: Binary RMAC using Janssen to predict Sanofi

|                                                              | log<br>MN 2<br>weeks<br>prior<br>chal-<br>lenge | log<br>MN<br>day<br>chal-<br>lenge | log<br>MSD<br>ECL 2<br>weeks<br>prior<br>chal-<br>lenge | log<br>MSD<br>ECL<br>day<br>chal-<br>lenge | log<br>PsVNA<br>ID50 2<br>weeks<br>prior<br>chal-<br>lenge | log<br>PsVNA<br>ID50<br>day<br>chal-<br>lenge | log<br>PsVNA<br>ID80 2<br>weeks<br>prior<br>chal-<br>lenge | log<br>PsVNA<br>ID80<br>day<br>chal-<br>lenge |
|--------------------------------------------------------------|-------------------------------------------------|------------------------------------|---------------------------------------------------------|--------------------------------------------|------------------------------------------------------------|-----------------------------------------------|------------------------------------------------------------|-----------------------------------------------|
| bin VL Day2<br>PostChal-<br>lenge BAL<br>N1                  | 1 (1,<br>1)                                     | 1 (1,<br>1)                        | 1 (1,<br>1)                                             | 1 (1,<br>1)                                | 1 (1,<br>1)                                                | 1 (1,<br>1)                                   | 1 (1,<br>1)                                                | 1 (1,<br>1)                                   |
| bin VL Day2<br>PostChal-<br>lenge BAL<br>Subgenomic          | -0.31<br>(-0.63,<br>0.02)                       | -0.27<br>(-0.44,<br>-0.13)         | 0.1<br>(-0.31,<br>0.49)                                 | -0.26<br>(-0.53,<br>0.08)                  | -0.08<br>(-0.44,<br>0.28)                                  | 0.15<br>(-0.26,<br>0.53)                      | -0.14<br>(-0.49,<br>0.21)                                  | 0.15<br>(-0.26,<br>0.53)                      |
| bin VL Day2<br>PostChal-<br>lenge<br>OPswab N1               | 0.34<br>(-0.13,<br>1)                           | -0.06<br>(-0.13,<br>1)             | -0.22<br>(-0.49,<br>0.13)                               | -0.08<br>(-0.37,<br>0.28)                  | -0.11<br>(-0.21,<br>-0.02)                                 | -0.08<br>(-0.18,<br>-0.02)                    | -0.06<br>(-0.16,<br>1)                                     | 0.65<br>(-0.06,<br>1)                         |
| bin VL Day2<br>PostChal-<br>lenge<br>OPswab<br>Subgenomic    | -0.08<br>(-0.37,<br>0.28)                       | -0.04<br>(-0.33,<br>0.35)          | 0.02<br>(-0.37,<br>0.39)                                | -0.08<br>(-0.46,<br>0.3)                   | 0.28<br>(-0.17,<br>0.65)                                   | -0.17<br>(-0.44,<br>0.19)                     | 0.1<br>(-0.31,<br>0.49)                                    | 0.16<br>(-0.27,<br>0.53)                      |
| bin VL Day2<br>PostChal-<br>lenge<br>NasalSwab<br>N1         | 1 (1,<br>1)                                     | 1 (1,<br>1)                        | 1 (1,<br>1)                                             | 1 (1,<br>1)                                | 1 (1,<br>1)                                                | 1 (1,<br>1)                                   | 1 (1,<br>1)                                                | 1 (1,<br>1)                                   |
| bin VL Day2<br>PostChal-<br>lenge<br>NasalSwab<br>Subgenomic | -0.11<br>(-0.21,<br>-0.02)                      | -0.08<br>(-0.18,<br>-0.02)         | -0.11<br>(-0.21,<br>-0.02)                              | -0.06<br>(-0.13,<br>1)                     | 0.11<br>(-0.24,<br>0.57)                                   | -0.16<br>(-0.3,<br>-0.06)                     | -0.02<br>(-0.06,<br>1)                                     | -0.13<br>(-0.24,<br>-0.04)                    |

Table 6.8.30: Binary RMAC using Janssen to predict Moderna

|                                                              | log<br>MN 2<br>weeks<br>prior<br>chal-<br>lenge | log<br>MN<br>day<br>chal-<br>lenge | log<br>MSD<br>ECL 2<br>weeks<br>prior<br>chal-<br>lenge | log<br>MSD<br>ECL<br>day<br>chal-<br>lenge | log<br>PsVNA<br>ID50 2<br>weeks<br>prior<br>chal-<br>lenge | log<br>PsVNA<br>ID50<br>day<br>chal-<br>lenge | log<br>PsVNA<br>ID80 2<br>weeks<br>prior<br>chal-<br>lenge | log<br>PsVNA<br>ID80<br>day<br>chal-<br>lenge |
|--------------------------------------------------------------|-------------------------------------------------|------------------------------------|---------------------------------------------------------|--------------------------------------------|------------------------------------------------------------|-----------------------------------------------|------------------------------------------------------------|-----------------------------------------------|
| bin VL Day2<br>PostChal-<br>lenge BAL<br>N1                  | -0.02<br>(-0.06,<br>1)                          | -0.02<br>(-0.06,<br>1)             | -0.02<br>(-0.06,<br>1)                                  | -0.02<br>(-0.06,<br>1)                     | -0.02<br>(-0.06,<br>1)                                     | -0.02<br>(-0.06,<br>1)                        | -0.02<br>(-0.06,<br>1)                                     | -0.02<br>(-0.06,<br>1)                        |
| bin VL Day2<br>PostChal-<br>lenge BAL<br>Subgenomic          | 0.08<br>(-0.32,<br>0.48)                        | 0.08<br>(-0.32,<br>0.48)           | -0.39<br>(-0.69,<br>-0.1)                               | 0.08<br>(-0.33,<br>0.48)                   | 0.17<br>(-0.28,<br>0.52)                                   | 0.31<br>(-0.1,<br>0.67)                       | 0.02<br>(-0.39,<br>0.41)                                   | -0.1<br>(-0.39,<br>0.27)                      |
| bin VL Day2<br>PostChal-<br>lenge<br>OPswab N1               | -0.08<br>(-0.18,<br>-0.02)                      | -0.04<br>(-0.11,<br>1)             | -0.18<br>(-0.33,<br>-0.08)                              | -0.13<br>(-0.27,<br>-0.04)                 | -0.13<br>(-0.24,<br>-0.04)                                 | -0.08<br>(-0.18,<br>-0.02)                    | -0.06<br>(-0.13,<br>1)                                     | -0.04<br>(-0.11,<br>1)                        |
| bin VL Day2<br>PostChal-<br>lenge<br>OPswab<br>Subgenomic    | -0.37<br>(-0.58,<br>-0.21)                      | -0.16<br>(-0.3,<br>-0.06)          | -0.13<br>(-0.41,<br>0.22)                               | 0.13<br>(-0.27,<br>0.56)                   | -0.03<br>(-0.37,<br>0.34)                                  | 0.19<br>(-0.21,<br>0.61)                      | -0.17<br>(-0.46,<br>0.17)                                  | -0.27<br>(-0.44,<br>-0.13)                    |
| bin VL Day2<br>PostChal-<br>lenge<br>NasalSwab<br>N1         | 1 (1,<br>1)                                     | 1 (1,<br>1)                        | 1 (1,<br>1)                                             | 1 (1,<br>1)                                | 1 (1,<br>1)                                                | 1 (1,<br>1)                                   | 1 (1,<br>1)                                                | 1 (1,<br>1)                                   |
| bin VL Day2<br>PostChal-<br>lenge<br>NasalSwab<br>Subgenomic | 0.01<br>(-0.3,<br>0.41)                         | -0.11<br>(-0.21,<br>-0.02)         | -0.11<br>(-0.21,<br>-0.02)                              | 0.5<br>(-0.11,<br>1)                       | 0.33<br>(-0.16,<br>0.78)                                   | 0.19<br>(-0.24,<br>0.62)                      | -0.16<br>(-0.3,<br>-0.06)                                  | 0.34<br>(-0.13,<br>1)                         |

Table 6.8.31: Binary RMAC using Janssen to predict Novavax

|                                                              | log<br>MN 2<br>weeks<br>prior<br>chal-<br>lenge | log<br>MN<br>day<br>chal-<br>lenge | log<br>MSD<br>ECL 2<br>weeks<br>prior<br>chal-<br>lenge | log<br>MSD<br>ECL<br>day<br>chal-<br>lenge | log<br>PsVNA<br>ID50 2<br>weeks<br>prior<br>chal-<br>lenge | log<br>PsVNA<br>ID50<br>day<br>chal-<br>lenge | log<br>PsVNA<br>ID80 2<br>weeks<br>prior<br>chal-<br>lenge | log<br>PsVNA<br>ID80<br>day<br>chal-<br>lenge |
|--------------------------------------------------------------|-------------------------------------------------|------------------------------------|---------------------------------------------------------|--------------------------------------------|------------------------------------------------------------|-----------------------------------------------|------------------------------------------------------------|-----------------------------------------------|
| bin VL Day2<br>PostChal-<br>lenge BAL<br>N1                  | -0.08<br>(-0.18,<br>-0.02)                      | -0.08<br>(-0.18,<br>-0.02)         | -0.08<br>(-0.18,<br>-0.02)                              | -0.08<br>(-0.18,<br>-0.02)                 | -0.08<br>(-0.18,<br>-0.02)                                 | -0.08<br>(-0.18,<br>-0.02)                    | -0.08<br>(-0.18,<br>-0.02)                                 | -0.08<br>(-0.18,<br>-0.02)                    |
| bin VL Day2<br>PostChal-<br>lenge BAL<br>Subgenomic          | 0.21<br>(-0.2,<br>0.54)                         | -0.17<br>(-0.55,<br>0.21)          | -0.24<br>(-0.62,<br>0.14)                               | 0.02<br>(-0.36,<br>0.41)                   | -0.42<br>(-0.73,<br>-0.08)                                 | 0.28<br>(-0.14,<br>0.64)                      | -0.24<br>(-0.58,<br>0.12)                                  | -0.2<br>(-0.58,<br>0.15)                      |
| bin VL Day2<br>PostChal-<br>lenge<br>OPswab N1               | -0.26<br>(-0.53,<br>0.08)                       | 0.02<br>(-0.33,<br>0.41)           | -0.08<br>(-0.46,<br>0.3)                                | -0.17<br>(-0.55,<br>0.21)                  | -0.39<br>(-0.73,<br>-0.08)                                 | -0.33<br>(-0.7,<br>0.02)                      | -0.01<br>(-0.42,<br>0.37)                                  | -0.14<br>(-0.52,<br>0.23)                     |
| bin VL Day2<br>PostChal-<br>lenge<br>OPswab<br>Subgenomic    | 0.15<br>(-0.26,<br>0.53)                        | 0<br>(-0.39,<br>0.38)              | 0.49<br>(0.01,<br>0.83)                                 | 0.28<br>(-0.18,<br>0.68)                   | -0.03<br>(-0.41,<br>0.35)                                  | -0.31<br>(-0.69,<br>0.05)                     | 0.15<br>(-0.26,<br>0.53)                                   | 0.14<br>(-0.26,<br>0.51)                      |
| bin VL Day2<br>PostChal-<br>lenge<br>NasalSwab<br>N1         | -0.02<br>(-0.06,<br>1)                          | -0.02<br>(-0.06,<br>1)             | -0.02<br>(-0.06,<br>1)                                  | -0.02<br>(-0.06,<br>1)                     | -0.02<br>(-0.06,<br>1)                                     | -0.02<br>(-0.06,<br>1)                        | -0.02<br>(-0.06,<br>1)                                     | -0.02<br>(-0.06,<br>1)                        |
| bin VL Day2<br>PostChal-<br>lenge<br>NasalSwab<br>Subgenomic | -0.19<br>(-0.53,<br>0.16)                       | 0.1<br>(-0.3,<br>0.49)             | -0.24<br>(-0.62,<br>0.14)                               | -0.37<br>(-0.58,<br>-0.21)                 | 0.05<br>(-0.36,<br>0.45)                                   | -0.2<br>(-0.58,<br>0.19)                      | 0.28<br>(-0.14,<br>0.61)                                   | 0.03<br>(-0.37,<br>0.39)                      |

Table 6.8.32: Binary RMAC using Novavax to predict Sanofi

|                                                              | log<br>MN 2<br>weeks<br>prior<br>chal-<br>lenge | log<br>MN<br>day<br>chal-<br>lenge | log<br>MSD<br>ECL 2<br>weeks<br>prior<br>chal-<br>lenge | log<br>MSD<br>ECL<br>day<br>chal-<br>lenge | log<br>PsVNA<br>ID50 2<br>weeks<br>prior<br>chal-<br>lenge | log<br>PsVNA<br>ID50<br>day<br>chal-<br>lenge | log<br>PsVNA<br>ID80 2<br>weeks<br>prior<br>chal-<br>lenge | log<br>PsVNA<br>ID80<br>day<br>chal-<br>lenge |
|--------------------------------------------------------------|-------------------------------------------------|------------------------------------|---------------------------------------------------------|--------------------------------------------|------------------------------------------------------------|-----------------------------------------------|------------------------------------------------------------|-----------------------------------------------|
| bin VL Day2<br>PostChal-<br>lenge BAL<br>N1                  | -0.02<br>(-0.06,<br>1)                          | 1 (1,<br>1)                        | -0.02<br>(-0.06,<br>1)                                  | 1 (1,<br>1)                                | -0.02<br>(-0.06,<br>1)                                     | -0.02<br>(-0.06,<br>1)                        | -0.02<br>(-0.06,<br>1)                                     | 1 (1,<br>1)                                   |
| bin VL Day2<br>PostChal-<br>lenge BAL<br>Subgenomic          | 0<br>(-0.39,<br>0.38)                           | 0.08<br>(-0.33,<br>0.44)           | -0.46<br>(-0.79,<br>-0.1)                               | 0.14<br>(-0.26,<br>0.51)                   | 0.19<br>(-0.22,<br>0.54)                                   | -0.16<br>(-0.55,<br>0.23)                     | 0.07<br>(-0.33,<br>0.45)                                   | -0.33<br>(-0.69,<br>0.03)                     |
| bin VL Day2<br>PostChal-<br>lenge<br>OPswab N1               | 0.25<br>(-0.16,<br>0.78)                        | -0.13<br>(-0.24,<br>-0.04)         | -0.13<br>(-0.24,<br>-0.04)                              | -0.06<br>(-0.16,<br>1)                     | -0.04<br>(-0.11,<br>1)                                     | -0.06<br>(-0.13,<br>1)                        | -0.13<br>(-0.27,<br>-0.04)                                 | 0.46<br>(-0.08,<br>1)                         |
| bin VL Day2<br>PostChal-<br>lenge<br>OPswab<br>Subgenomic    | -0.08<br>(-0.37,<br>0.28)                       | 0.12<br>(-0.3,<br>0.49)            | 0.22<br>(-0.22,<br>0.6)                                 | 0.57<br>(0.11,<br>0.9)                     | 0.34<br>(-0.1,<br>0.69)                                    | 0.1<br>(-0.31,<br>0.49)                       | 0.22<br>(-0.22,<br>0.61)                                   | 0.28<br>(-0.14,<br>0.64)                      |
| bin VL Day2<br>PostChal-<br>lenge<br>NasalSwab<br>N1         | 1 (1,<br>1)                                     | 1 (1,<br>1)                        | 1 (1,<br>1)                                             | 1 (1,<br>1)                                | -0.04<br>(-0.11,<br>1)                                     | 1 (1,<br>1)                                   | 1 (1,<br>1)                                                | 1 (1,<br>1)                                   |
| bin VL Day2<br>PostChal-<br>lenge<br>NasalSwab<br>Subgenomic | -0.13<br>(-0.24,<br>-0.04)                      | -0.04<br>(-0.33,<br>0.35)          | -0.11<br>(-0.21,<br>-0.02)                              | -0.08<br>(-0.18,<br>-0.02)                 | 0.11<br>(-0.24,<br>0.57)                                   | -0.16<br>(-0.3,<br>-0.06)                     | -0.04<br>(-0.11,<br>1)                                     | -0.16<br>(-0.3,<br>-0.06)                     |

Table 6.8.33: Binary RMAC using Novavax to predict Moderna

|                                                              | log<br>MN 2<br>weeks<br>prior<br>chal-<br>lenge | log<br>MN<br>day<br>chal-<br>lenge | log<br>MSD<br>ECL 2<br>weeks<br>prior<br>chal-<br>lenge | log<br>MSD<br>ECL<br>day<br>chal-<br>lenge | log<br>PsVNA<br>ID50 2<br>weeks<br>prior<br>chal-<br>lenge | log<br>PsVNA<br>ID50<br>day<br>chal-<br>lenge | log<br>PsVNA<br>ID80 2<br>weeks<br>prior<br>chal-<br>lenge | log<br>PsVNA<br>ID80<br>day<br>chal-<br>lenge |
|--------------------------------------------------------------|-------------------------------------------------|------------------------------------|---------------------------------------------------------|--------------------------------------------|------------------------------------------------------------|-----------------------------------------------|------------------------------------------------------------|-----------------------------------------------|
| bin VL Day2<br>PostChal-<br>lenge BAL<br>N1                  | -0.02<br>(-0.06,<br>1)                          | -0.06<br>(-0.16,<br>1)             | -0.02<br>(-0.06,<br>1)                                  | -0.02<br>(-0.06,<br>1)                     | -0.06<br>(-0.14,<br>1)                                     | -0.04<br>(-0.11,<br>1)                        | -0.04<br>(-0.11,<br>1)                                     | -0.02<br>(-0.06,<br>1)                        |
| bin VL Day2<br>PostChal-<br>lenge BAL<br>Subgenomic          | -0.36<br>(-0.72,<br>-0.04)                      | 0.26<br>(-0.16,<br>0.63)           | 0.43<br>(0.03,<br>0.76)                                 | 0.35<br>(-0.05,<br>0.68)                   | 0.03<br>(-0.4,<br>0.43)                                    | 0.03<br>(-0.37,<br>0.41)                      | 0.12<br>(-0.3,<br>0.5)                                     | -0.1<br>(-0.5,<br>0.26)                       |
| bin VL Day2<br>PostChal-<br>lenge<br>OPswab N1               | -0.08<br>(-0.18,<br>-0.02)                      | -0.06<br>(-0.13,<br>1)             | -0.06<br>(-0.13,<br>1)                                  | -0.06<br>(-0.16,<br>1)                     | -0.21<br>(-0.37,<br>-0.08)                                 | -0.06<br>(-0.13,<br>1)                        | -0.04<br>(-0.11,<br>1)                                     | -0.08<br>(-0.18,<br>-0.02)                    |
| bin VL Day2<br>PostChal-<br>lenge<br>OPswab<br>Subgenomic    | -0.08<br>(-0.37,<br>0.28)                       | -0.14<br>(-0.52,<br>0.22)          | -0.21<br>(-0.37,<br>-0.11)                              | 0.06<br>(-0.27,<br>0.5)                    | -0.27<br>(-0.44,<br>-0.13)                                 | 0.13<br>(-0.27,<br>0.5)                       | 0.08<br>(-0.3,<br>0.49)                                    | 0.08<br>(-0.3,<br>0.46)                       |
| bin VL Day2<br>PostChal-<br>lenge<br>NasalSwab<br>N1         | 1 (1,<br>1)                                     | 1 (1,<br>1)                        | 1 (1,<br>1)                                             | 1 (1,<br>1)                                | -0.02<br>(-0.06,<br>1)                                     | 1 (1,<br>1)                                   | 1 (1,<br>1)                                                | 1 (1,<br>1)                                   |
| bin VL Day2<br>PostChal-<br>lenge<br>NasalSwab<br>Subgenomic | -0.08<br>(-0.37,<br>0.28)                       | 0.01<br>(-0.3,<br>0.41)            | -0.16<br>(-0.3,<br>-0.06)                               | 0.17<br>(-0.18,<br>0.65)                   | 0.33<br>(-0.16,<br>0.78)                                   | 0.13<br>(-0.27,<br>0.56)                      | -0.18<br>(-0.33,<br>-0.08)                                 | 0.25<br>(-0.16,<br>0.78)                      |

Table 6.8.34: Binary RMAC using Novavax to predict Janssen

|                                                              | log<br>MN 2<br>weeks<br>prior<br>chal-<br>lenge | log<br>MN<br>day<br>chal-<br>lenge | log<br>MSD<br>ECL 2<br>weeks<br>prior<br>chal-<br>lenge | log<br>MSD<br>ECL<br>day<br>chal-<br>lenge | log<br>PsVNA<br>ID50 2<br>weeks<br>prior<br>chal-<br>lenge | log<br>PsVNA<br>ID50<br>day<br>chal-<br>lenge | log<br>PsVNA<br>ID80 2<br>weeks<br>prior<br>chal-<br>lenge | log<br>PsVNA<br>ID80<br>day<br>chal-<br>lenge |
|--------------------------------------------------------------|-------------------------------------------------|------------------------------------|---------------------------------------------------------|--------------------------------------------|------------------------------------------------------------|-----------------------------------------------|------------------------------------------------------------|-----------------------------------------------|
| bin VL Day2<br>PostChal-<br>lenge BAL<br>N1                  | -0.03<br>(-0.08,<br>1)                          | -0.02<br>(-0.05,<br>1)             | 1 (1,<br>1)                                             | 1 (1,<br>1)                                | -0.03<br>(-0.08,<br>1)                                     | -0.03<br>(-0.08,<br>1)                        | 1 (1,<br>1)                                                | 1 (1,<br>1)                                   |
| bin VL Day2<br>PostChal-<br>lenge BAL<br>Subgenomic          | -0.12<br>(-0.49,<br>0.2)                        | 0.04<br>(-0.32,<br>0.37)           | -0.22<br>(-0.55,<br>0.12)                               | -0.22<br>(-0.56,<br>0.12)                  | -0.19<br>(-0.52,<br>0.12)                                  | -0.06<br>(-0.43,<br>0.28)                     | -0.19<br>(-0.52,<br>0.12)                                  | -0.56<br>(-0.83,<br>-0.27)                    |
| bin VL Day2<br>PostChal-<br>lenge<br>OPswab N1               | 0.47<br>(-0.07,<br>1)                           | -0.14<br>(-0.25,<br>-0.05)         | 0.65<br>(-0.05,<br>1)                                   | -0.07<br>(-0.14,<br>-0.02)                 | -0.03<br>(-0.28,<br>0.33)                                  | -0.03<br>(-0.08,<br>1)                        | 0.2<br>(-0.14,<br>0.65)                                    | 0.2<br>(-0.14,<br>0.65)                       |
| bin VL Day2<br>PostChal-<br>lenge<br>OPswab<br>Subgenomic    | 0.39<br>(-0.03,<br>0.74)                        | -0.02<br>(-0.38,<br>0.33)          | -0.16<br>(-0.28,<br>-0.07)                              | 0.29<br>(-0.14,<br>0.71)                   | -0.03<br>(-0.28,<br>0.32)                                  | 0.18<br>(-0.21,<br>0.59)                      | -0.17<br>(-0.42,<br>0.13)                                  | 0.08<br>(-0.29,<br>0.42)                      |
| bin VL Day2<br>PostChal-<br>lenge<br>NasalSwab<br>N1         | 1 (1,<br>1)                                     | 1 (1,<br>1)                        | 1 (1,<br>1)                                             | 1 (1,<br>1)                                | -0.1<br>(-0.21,<br>-0.03)                                  | 1 (1,<br>1)                                   | -0.02<br>(-0.05,<br>1)                                     | 1 (1,<br>1)                                   |
| bin VL Day2<br>PostChal-<br>lenge<br>NasalSwab<br>Subgenomic | 0.05<br>(-0.23,<br>0.43)                        | 0.04<br>(-0.28,<br>0.42)           | -0.12<br>(-0.23,<br>-0.05)                              | 0.26<br>(-0.12,<br>0.78)                   | 0.05<br>(-0.23,<br>0.43)                                   | -0.16<br>(-0.28,<br>-0.07)                    | -0.16<br>(-0.28,<br>-0.07)                                 | -0.14<br>(-0.25,<br>-0.07)                    |
